# Supplementary material for: Impaired amino acid uptake leads to global metabolic imbalance of Candida albicans biofilms
Source: NPJ Biofilms Microbiomes. 2022 Oct 13;8:78. doi: 10.1038/s41522-022-00341-9 (PMC9556537; doi:10.1038/s41522-022-00341-9)
Supplement: Supplementary file 2 — S1 Transcriptomics data set [file 41522_2022_341_MOESM2_ESM.xlsx]

## Sheet: Biofilm.results.fc.pval
	gene.id	locus.tag	oxygen.8h.stp2.vs.WTlog2FoldChange	oxygen.8h.stp2.vs.WTpadj	oxygen.24h.stp2.vs.WTlog2FoldChange	oxygen.24h.stp2.vs.WTpadj	oxygen.48h.stp2.vs.WTlog2FoldChange	oxygen.48h.stp2.vs.WTpadj	hypoxia.8h.stp2.vs.WTbaseMean	hypoxia.8h.stp2.vs.WTlog2FoldChange	hypoxia.8h.stp2.vs.WTpadj	hypoxia.24h.stp2.vs.WTbaseMean	hypoxia.24h.stp2.vs.WTlog2FoldChange	hypoxia.24h.stp2.vs.WTpadj	hypoxia.48h.stp2.vs.WTbaseMean	hypoxia.48h.stp2.vs.WTlog2FoldChange	hypoxia.48h.stp2.vs.WTpadj	oxygen.WT.24h.vs.8hbaseMean	oxygen.WT.24h.vs.8hlog2FoldChange	oxygen.WT.24h.vs.8hpadj	oxygen.WT.48h.vs.8hbaseMean	oxygen.WT.48h.vs.8hlog2FoldChange	oxygen.WT.48h.vs.8hpadj	oxygen.WT.48h.vs.24hbaseMean	oxygen.WT.48h.vs.24hlog2FoldChange	oxygen.WT.48h.vs.24hpadj	oxygen.stp2d.24h.vs.8hbaseMean	oxygen.stp2d.24h.vs.8hlog2FoldChange	oxygen.stp2d.24h.vs.8hpadj	oxygen.stp2d.48h.vs.8hbaseMean	oxygen.stp2d.48h.vs.8hlog2FoldChange	oxygen.stp2d.48h.vs.8hpadj	oxygen.stp2d.48h.vs.24hbaseMean	oxygen.stp2d.48h.vs.24hlog2FoldChange	oxygen.stp2d.48h.vs.24hpadj	hypoxia.WT.24h.vs.8hbaseMean	hypoxia.WT.24h.vs.8hlog2FoldChange	hypoxia.WT.24h.vs.8hpadj	hypoxia.WT.48h.vs.8hbaseMean	hypoxia.WT.48h.vs.8hlog2FoldChange	hypoxia.WT.48h.vs.8hpadj	hypoxia.WT.48h.vs.24hbaseMean	hypoxia.WT.48h.vs.24hlog2FoldChange	hypoxia.WT.48h.vs.24hpadj	hypoxia.stp2d.24h.vs.8hbaseMean	hypoxia.stp2d.24h.vs.8hlog2FoldChange	hypoxia.stp2d.24h.vs.8hpadj	hypoxia.stp2d.48h.vs.8hbaseMean	hypoxia.stp2d.48h.vs.8hlog2FoldChange
C3_05580C	GAP2	C3_05580C	-8.17899	9.31667e-48	-6.29118	4.12864e-28	-6.61463	4.7309e-48	1749.44	-4.95992	4.01128e-80	3145.7	-5.45677	5.12363e-110	1947.05	-4.49447	2.64399e-139	23416.6	0.98542	0.104434	23416.6	0.570661	0.374427	23416.6	-0.41476	0.654645	277.23	2.88149	1.3319e-06	277.23	2.17259	0.000225287	277.23	-0.708898	0.326929	4217.6	1.08498	3.61102e-06	4217.6	-0.320552	0.184693	4217.6	-1.40553	3.0059e-10	153.176	0.61218	0.209103	153.176	0.19298
C4_06220C		C4_06220C	3.9968	0.111727	0.445407	0.835287	-5.04319	0.0184548	24.0249	0.894442	0.506359	30.7173	-0.505274	0.560655	71.0681	1.49099	0.0262446	21.7983	4.64234	0.000460946	21.7983	5.81877	5.28573e-06	21.7983	1.17643	0.393234	16.1847	1.11063	0.512193	16.1847	-3.17422	0.0453513	16.1847	-4.28485	0.00886326	27.3102	1.33955	0.161779	27.3102	0.699563	0.423676	27.3102	-0.639983	0.477038	53.6192	-0.0170285	0.990392	53.6192	1.3667
C6_00330C	GNP1	C6_00330C	-5.28195	4.92165e-150	-3.73516	3.45608e-16	-4.7101	0.000105032	16066.7	-2.71723	8.18733e-05	5793.1	-2.54144	4.16991e-34	9353.85	-4.20871	5.26039e-128	9187.86	-2.46048	0.000479003	9187.86	-0.101718	0.910381	9187.86	2.35876	0.00315028	392.149	-0.905212	0.0719501	392.149	0.500983	0.318354	392.149	1.4062	0.00374664	16608.6	-1.27	2.87869e-09	16608.6	-1.10999	8.99163e-08	16608.6	0.160001	0.523619	2652.79	-1.05189	0.109465	2652.79	-2.53434
C1_13350W	STP2	C1_13350W	-3.66939	1.2728e-118	-4.65505	1.01918e-26	-4.03767	4.7309e-48	12475.8	-4.08124	5.75506e-66	12233.4	-3.95231	3.04281e-60	12139	-3.97593	8.35821e-114	13445.9	0.962386	0.0162341	13445.9	1.32413	0.000592673	13445.9	0.361745	0.549177	920.492	-0.0147197	0.971894	920.492	0.997442	0.000385315	920.492	1.01216	0.000647917	21279.6	0.192704	0.540329	21279.6	-0.50306	0.0325853	21279.6	-0.695765	0.00309502	1623.83	0.352917	0.352396	1623.83	-0.339638
C6_01060C	CAN2	C6_01060C	-3.79142	3.09087e-79	-4.09491	2.27061e-23	-3.33992	4.02493e-13	9664.23	-5.33888	4.80883e-14	6379.52	-4.99739	5.70625e-140	6036.74	-4.35657	1.69107e-174	14611.6	-1.21316	0.00698626	14611.6	0.519514	0.290167	14611.6	1.73267	0.000366864	1472.44	-1.50419	0.000252216	1472.44	1.00574	0.0133321	1472.44	2.50993	3.28625e-10	13229	-0.383542	0.102259	13229	-1.1715	1.62893e-09	13229	-0.787957	9.07452e-05	514.138	0.00528456	0.995757	514.138	-0.11793
C4_00290C		C4_00290C	0.354008	0.662911	0.960513	0.549947	-3.19287	0.000143083	132.907	1.98164	2.21582e-06	164.534	0.646053	0.0697676	462.349	0.637703	0.0149438	210.792	1.51558	0.0241441	210.792	1.69804	0.0100113	210.792	0.182455	0.878467	255.54	2.13013	0.00320228	255.54	-1.81995	0.0114121	255.54	-3.95007	2.2479e-08	148.181	1.48096	3.6106e-05	148.181	2.29163	1.24277e-12	148.181	0.810663	0.0148329	334.571	0.167395	0.688784	334.571	0.993317
C5_02790C	GAP1	C5_02790C	-3.06337	6.892e-50	-1.93968	0.020865	-2.70579	6.79216e-06	6053.42	-1.51838	8.51734e-07	6188.35	-1.73959	1.90902e-14	13102.4	-2.86469	3.36885e-66	6399.64	-2.27279	5.78729e-05	6399.64	0.0293553	0.967437	6399.64	2.30214	0.000247302	1141.5	-1.13825	0.0287199	1141.5	0.420909	0.442248	1141.5	1.55916	0.00225725	11702.5	0.311678	0.232144	11702.5	0.902542	1.55086e-05	11702.5	0.590864	0.0069423	3397.48	0.125631	0.798189	3397.48	-0.386159
C5_01800C	HIP1	C5_01800C	-4.01531	1.13969e-65	-3.09544	8.55629e-12	-2.52606	5.0773e-09	4001.24	-2.37429	5.33423e-15	3001.46	-1.78581	1.53531e-23	3938.35	-1.70229	3.52579e-21	3169.8	-0.337448	0.455241	3169.8	0.298592	0.514197	3169.8	0.63604	0.234899	467.221	0.588319	0.265509	467.221	1.82336	3.36339e-05	467.221	1.23504	0.0105407	5244.86	-0.301845	0.198509	5244.86	-0.61258	0.00148239	5244.86	-0.310735	0.13868	1637.73	0.323145	0.426568	1637.73	0.11818
C3_06580W	JEN1	C3_06580W	-1.7995	0.0187548	-3.41736	5.44271e-06	-2.52051	0.013108	26.8307	1.46237	0.309262	54.5054	-0.0836734	0.925973	116.735	0.00049572	0.999671	158.151	0.839516	0.263535	158.151	1.68943	0.0142004	158.151	0.849917	0.384131	32.2661	-0.782854	0.481273	32.2661	1.00117	0.296995	32.2661	1.78402	0.0729321	52.2454	2.20072	0.0174831	52.2454	2.56506	0.00189449	52.2454	0.364339	0.70813	72.5342	0.701822	0.501989	72.5342	1.18427
C1_10450W	GLY1	C1_10450W	-2.54487	0.00223177	-1.75348	0.0855014	-2.37267	0.000482764	4259.73	0.0234419	0.98682	2848.59	0.365966	0.304716	10629.8	-2.9564	7.93248e-39	6145.66	-0.0280118	0.974145	6145.66	1.74015	0.00350549	6145.66	1.76816	0.0098371	1544.58	0.776615	0.453583	1544.58	1.94885	0.0229076	1544.58	1.17223	0.241935	6616.35	-0.536982	0.121769	6616.35	1.69922	2.20824e-09	6616.35	2.2362	4.29605e-15	3775.88	-0.150512	0.903165	3775.88	-1.2147
C7_03740C		C7_03740C	2.72368	0.0829031	-2.37926	8.28854e-05	-2.08648	8.50128e-05	94.3198	2.93546	6.11604e-08	133.898	0.101553	0.893724	295.924	-0.412941	0.391147	2687.4	7.95502	4.31216e-30	2687.4	10.9364	7.68731e-57	2687.4	2.9814	3.57802e-06	765.868	2.86655	7.15263e-15	765.868	6.16823	9.09305e-70	765.868	3.30168	4.32755e-24	132.829	2.79677	4.58815e-07	132.829	3.49411	1.87915e-11	132.829	0.697345	0.21092	199.836	-0.0073694	0.993598	199.836	0.205219
C2_06020W	CNT	C2_06020W	-1.52005	6.41539e-13	-1.35816	0.153569	-1.99863	0.00547982	7433.4	-1.58774	0.0669281	3417.19	-0.85799	0.000950231	8485.22	-2.79471	2.33118e-75	7417.49	-0.202383	0.750527	7417.49	1.01552	0.058159	7417.49	1.2179	0.0522988	2739.94	-0.0304982	0.96767	2739.94	0.571344	0.316079	2739.94	0.601843	0.344416	8597.81	-1.11572	1.85503e-05	8597.81	-0.047517	0.871531	8597.81	1.0682	2.06988e-05	3121.76	-0.342557	0.69478	3121.76	-1.18735
C3_07670W		C3_07670W	0.334014	0.282822	0.152375	0.890421	-1.93638	0.00743201	860.242	0.909045	0.00598106	927.426	0.876324	0.000954066	1554.07	-0.50491	0.0222275	1783.56	-0.022442	0.975287	1783.56	2.46123	6.94544e-07	1783.56	2.48367	4.76165e-06	1089.08	-0.194404	0.691576	1089.08	0.228538	0.595975	1089.08	0.422942	0.352179	853.29	0.355898	0.196306	853.29	1.15129	1.29888e-07	853.29	0.795389	0.00043858	1342.4	0.353033	0.336765	1342.4	-0.209319
C1_02980W	GOR1	C1_02980W	-0.609564	0.0568186	-1.71257	0.0175153	-1.93612	1.89995e-06	312.735	0.00270008	0.996559	323.038	-0.790036	0.00325041	607.566	-0.243352	0.370707	1467.77	-0.291342	0.555986	1467.77	1.83992	6.14304e-06	1467.77	2.13126	1.35235e-06	605.008	-1.38253	0.000646297	605.008	0.554085	0.185707	605.008	1.93662	1.09576e-06	403.249	0.616604	0.0884483	403.249	0.618908	0.0519373	403.249	0.00230389	0.994736	388.437	-0.162847	0.80403	388.437	0.410132
C5_03500W	GAP6	C5_03500W	-3.02311	0.00184283	-1.68391	0.00694597	-1.79938	3.5876e-05	22764.8	-2.45302	6.36536e-14	17573.4	-1.6864	2.64339e-16	27082.2	-1.43056	7.95823e-21	11541.2	-0.102924	0.846214	11541.2	1.34096	0.00101125	11541.2	1.44388	0.00172582	3579.61	1.24963	0.151775	3579.61	2.61199	0.000592204	3579.61	1.36236	0.122514	31279.8	-0.294912	0.198123	31279.8	-0.419841	0.0294165	31279.8	-0.124929	0.577134	10671.8	0.509217	0.20547	10671.8	0.663971
C4_05430C	GAP5	C4_05430C	-2.21167	4.6284e-25	-1.44128	0.180402	-1.78291	0.0422619	2309.64	-0.893085	0.0744042	1653.55	0.291665	0.406624	3546.87	-1.78364	3.8001e-16	2263.01	-0.37908	0.587951	2263.01	0.174228	0.810095	2263.01	0.553308	0.546476	776.702	0.397923	0.567224	776.702	0.631314	0.290203	776.702	0.233391	0.766493	2773.82	-0.788338	0.00598092	2773.82	0.415305	0.130442	2773.82	1.20364	4.13087e-06	1896.59	0.438158	0.606691	1896.59	-0.411755
C1_11990W		C1_11990W	0.0471196	0.933749	-0.0542748	0.977627	-1.71045	0.00101618	690.731	-0.752983	0.132416	431.788	-1.05596	0.000270915	313.199	-1.59825	5.19607e-07	1408.24	-1.36549	0.00189282	1408.24	0.836156	0.0679666	1408.24	2.20164	1.71856e-06	1041.48	-1.46034	0.000262211	1041.48	-0.883148	0.0277171	1041.48	0.577189	0.213798	600.171	-0.344206	0.368905	600.171	-1.33893	3.80954e-06	600.171	-0.994722	0.000963104	370.321	-0.630775	0.228874	370.321	-2.14183
C5_04490C	CAR1	C5_04490C	-2.01222	1.03066e-31	-0.14865	0.922875	-1.67706	0.0192873	10016.7	-1.53232	8.20087e-11	11273.9	-2.63079	1.53697e-30	7120.03	-1.75437	0.0450207	23814.2	-3.43441	1.07668e-09	23814.2	-1.87345	0.00137615	23814.2	1.56096	0.0251929	8704.04	-1.56146	4.51644e-09	8704.04	-1.49984	9.33555e-09	8704.04	0.0616153	0.882024	14447.1	0.607972	0.530586	14447.1	-0.900061	0.23655	14447.1	-1.50803	0.0443924	4332.97	-0.461735	0.0300825	4332.97	-1.06895
C3_02650W		C3_02650W	0.100653	0.943346	-0.0307833	0.983802	-1.66902	0.00186862	81.7594	1.40498	0.0714609	144.712	-0.712384	0.0917277	257.721	-1.06323	0.00252809	292.586	1.62451	0.000100491	292.586	3.98164	3.25732e-25	292.586	2.35713	1.82469e-08	161.461	1.50556	0.0022127	161.461	2.25901	7.59008e-07	161.461	0.753445	0.157986	161.406	2.22827	1.41625e-06	161.406	2.4997	8.65026e-09	161.406	0.271428	0.596929	143.029	0.153967	0.845085	143.029	0.103803
C6_02080W		C6_02080W	-0.102249	0.925899	-0.949696	0.482924	-1.64996	0.00369458	786.113	0.757537	0.115705	728.37	0.895013	0.000241332	1435.2	-0.43993	0.0978117	766.87	2.47669	9.4993e-06	766.87	3.46443	1.60201e-10	766.87	0.987738	0.191129	386.613	1.64245	0.00404996	386.613	1.96374	0.000267118	386.613	0.321289	0.663009	755.745	0.028942	0.933474	755.745	1.04164	1.24935e-06	755.745	1.0127	4.08997e-06	1154.73	0.204883	0.731827	1154.73	-0.095553
C4_02720C		C4_02720C	0.409291	0.100388	-0.367231	0.81122	-1.54211	0.0114349	2904.8	0.551067	0.0638455	1912.86	0.247201	0.472001	4639.18	-0.292602	0.158743	5910.93	0.644968	0.269657	5910.93	1.47634	0.00557703	5910.93	0.831374	0.249439	4653.98	-0.126098	0.795239	4653.98	-0.424743	0.276623	4653.98	-0.298645	0.519612	2577.61	-0.202472	0.556993	2577.61	0.658615	0.00928519	2577.61	0.861087	0.000695796	3462.79	-0.476327	0.0722464	3462.79	-0.131624
C7_03310W		C7_03310W	-1.39085	0.0248634	-1.88412	0.00932804	-1.48131	0.000482764	726.929	-0.730725	0.043648	302.543	-1.74598	0.000105905	300.63	-0.109547	0.824083	652.475	1.97069	6.85686e-05	652.475	1.89906	0.000112667	652.475	-0.0716309	0.941957	254.659	1.4965	0.00493598	254.659	1.86032	0.000197305	254.659	0.363818	0.585933	532.8	-0.732081	0.0979973	532.8	-1.99921	6.24787e-08	532.8	-1.26713	0.00106338	354.655	-1.72446	2.26489e-05	354.655	-1.32644
C3_05170W	WOR2	C3_05170W	0.242391	0.519656	-0.0925088	0.962003	-1.47574	0.0085668	823.106	0.0294132	0.959545	1108.3	-0.294731	0.436943	2099.22	-0.92659	6.05217e-09	7422.65	2.89737	8.3315e-09	7422.65	4.58864	5.43835e-21	7422.65	1.69126	0.00436503	4677.08	2.5755	1.91465e-18	4677.08	2.92062	5.75886e-24	4677.08	0.345112	0.365613	1347.06	0.8129	0.00176207	1347.06	1.2985	3.13878e-08	1347.06	0.485595	0.0571351	1186.73	0.520673	0.164647	1186.73	0.397412
C4_02740W		C4_02740W	-0.359946	0.0655347	0.489242	0.519578	-1.45342	0.0024494	15673.2	0.140829	0.720759	9846.99	0.454995	0.023447	21853.4	-1.10641	1.09161e-07	48453.4	-0.0396149	0.933481	48453.4	1.05579	0.00230313	48453.4	1.0954	0.00555699	41875.4	0.819235	0.00600358	41875.4	0.0129966	0.972657	41875.4	-0.806239	0.00823518	14708.6	-0.616113	0.0182586	14708.6	0.545574	0.0224761	14708.6	1.16169	6.08294e-07	15433.4	-0.271415	0.26215	15433.4	-0.648547
C6_00960W	CAN1	C6_00960W	0.636599	0.0283594	-0.161966	0.924959	-1.36597	0.0374256	2940.12	2.08323	0.00495033	3030.02	2.07425	1.87174e-16	5522.22	-0.421864	0.138296	7689.44	2.50996	2.27712e-07	7689.44	3.32586	2.08262e-12	7689.44	0.815894	0.228799	5850.43	1.72117	2.76852e-05	5850.43	1.3688	0.000672206	5850.43	-0.352377	0.501673	2250.21	0.274541	0.534667	2250.21	2.03682	6.05884e-11	2250.21	1.76228	3.08027e-08	5382.03	0.307451	0.718094	5382.03	-0.406595
C2_03640W	UGA11	C2_03640W	0.324681	0.730644	-2.42702	0.0096545	-1.34164	0.00369458	1385.15	-0.429625	0.141811	1061.58	-1.06165	3.16927e-07	1668.86	-0.144602	0.615293	7351.64	1.72036	0.00397384	7351.64	3.03156	9.2334e-08	7351.64	1.3112	0.0739395	3644.98	-1.02036	0.0337338	3644.98	1.40293	0.00149185	3644.98	2.42328	5.31149e-08	1442.18	0.078362	0.83032	1442.18	-0.316475	0.228956	1442.18	-0.394837	0.140103	1220.97	-0.530726	0.0117072	1220.97	0.014178
C2_02290C		C2_02290C	-0.0579991	0.924748	0.126605	0.926185	-1.33543	0.0381907	214.831	-0.208483	0.712154	184.411	-0.139388	0.792031	205.361	-0.292728	0.553892	297.889	-0.289498	0.571388	297.889	0.48156	0.316729	297.889	0.771057	0.178728	268.613	-0.0950573	0.814821	268.613	-0.747888	0.0130242	268.613	-0.652831	0.0475413	196.971	-0.0277995	0.96222	196.971	-0.482357	0.207804	196.971	-0.454558	0.259404	209.238	0.0646113	0.931998	209.238	-0.522953
C1_02530C	DIP5	C1_02530C	-1.90097	1.54398e-53	-1.6825	2.55995e-09	-1.28968	0.0114349	36937.2	-2.52341	3.56809e-49	30055.4	-2.43644	8.1e-55	18540.1	-1.14097	5.26581e-15	39244.4	-0.581096	0.13424	39244.4	-0.46595	0.240655	39244.4	0.115147	0.859898	15262.6	-0.35289	0.102081	15262.6	0.182994	0.402274	15262.6	0.535884	0.0102844	44679.4	-0.0840251	0.697802	44679.4	-1.76073	3.83789e-35	44679.4	-1.67671	2.28024e-31	11776.6	0.0307529	0.920786	11776.6	-0.326224
CR_06140W		CR_06140W	0.158574	0.778918	0.358227	0.763922	-1.27885	0.0114349	2450.5	0.455157	0.197483	3366.33	0.558452	0.0766594	6701.29	-0.128217	0.576977	5339.76	3.40281	3.67394e-21	5339.76	4.72708	9.62365e-41	5339.76	1.32427	0.00205631	4357.55	3.61515	2.22171e-22	4357.55	3.3408	1.31862e-19	4357.55	-0.27435	0.598668	3284.15	0.627123	0.0586448	3284.15	1.30376	4.0607e-06	3284.15	0.676634	0.0250789	4751.53	0.756633	0.000596091	4751.53	0.771342
C2_03220C	STP4	C2_03220C	0.375562	0.273665	0.426557	0.797768	-1.25387	0.0203216	6095.76	0.355176	0.334156	6722.78	0.451471	0.0453748	14278.1	-0.844084	6.60254e-05	7469.34	2.06395	0.000189937	7469.34	2.20174	5.44513e-05	7469.34	0.137787	0.893575	8128.92	2.12162	1.1588e-10	8128.92	0.622475	0.0776627	8128.92	-1.49914	1.28641e-05	8045.19	0.314509	0.331545	8045.19	1.32187	9.05835e-08	8045.19	1.00737	7.6653e-05	9078.53	0.442387	0.0637004	9078.53	0.176345
C6_02450W		C6_02450W	0.0132239	0.978492	-1.62417	0.00956791	-1.25331	0.0385715	385.159	0.93564	0.0268015	680.84	0.353541	0.212376	1113.63	0.166436	0.500424	6019.44	2.43393	1.53618e-08	6019.44	3.32589	2.51544e-15	6019.44	0.891956	0.11756	3089.37	0.805027	0.0249116	3089.37	2.09192	5.71369e-11	3089.37	1.28689	0.000192417	547.907	1.40371	1.81212e-07	547.907	1.53083	1.95231e-09	547.907	0.127115	0.688755	880.213	0.838299	0.0059333	880.213	0.802635
C3_02850C		C3_02850C	0.0414904	0.935517	-0.697352	0.186779	-1.20719	0.000771029	464.805	0.304692	0.534929	429.179	-0.0220133	0.961217	698.558	-0.394104	0.0891296	1021.7	0.909578	0.000364319	1021.7	1.84291	1.50539e-14	1021.7	0.933331	0.00095835	714.113	0.183016	0.548834	714.113	0.637633	0.00844272	714.113	0.454618	0.0942965	475.703	0.28307	0.470472	475.703	0.472619	0.121432	475.703	0.189549	0.585124	563.573	-0.0121223	0.980777	563.573	-0.170959
C3_02640C	ZCF1	C3_02640C	-0.0309928	0.955196	0.122024	0.857476	-1.19547	0.00894637	1111.91	1.38368	2.61459e-06	1959.67	0.929316	0.000751118	3661.16	-0.808235	3.57597e-05	4369.84	2.91639	2.66159e-24	4369.84	3.97303	2.92124e-45	4369.84	1.05664	0.00205631	3505.63	3.08028	5.98841e-57	3505.63	2.85864	4.29615e-49	3505.63	-0.221643	0.393232	1773.93	1.36042	6.23385e-07	1773.93	2.46397	2.4117e-22	1773.93	1.10355	3.24335e-05	2545.97	0.936569	0.000146792	2545.97	0.326566
C7_04230W	NRG1	C7_04230W	-0.514527	0.198383	0.28392	0.801223	-1.17285	0.00888329	4158.44	0.809937	0.00262357	3187.31	0.612674	0.027056	7322.97	-0.865248	1.54612e-06	7494.26	2.04736	3.87787e-07	7494.26	1.87801	3.25598e-06	7494.26	-0.169346	0.814379	7541.2	2.8562	3.90424e-20	7541.2	1.26723	7.68985e-05	7541.2	-1.58897	1.45464e-06	4078.86	-0.0326774	0.931428	4078.86	1.18937	5.66923e-07	4078.86	1.22205	4.2857e-07	5263.99	-0.200157	0.507956	5263.99	-0.430167
C5_01560C		C5_01560C	-0.469089	0.0371099	0.0137751	0.989477	-1.13079	0.0152216	2631.94	0.545671	0.167868	1778.7	0.874828	2.53492e-05	3961.45	-0.629018	0.00113592	3806.35	-0.405995	0.305917	3806.35	0.764765	0.0386999	3806.35	1.17076	0.0037734	3001.31	0.0853537	0.817481	3001.31	0.148642	0.63767	3001.31	0.0632887	0.876603	2256.3	-0.544306	0.0450916	2256.3	0.711348	0.0028382	2256.3	1.25565	1.03724e-07	3128.76	-0.180493	0.635078	3128.76	-0.405577
C3_00670C	FKH2	C3_00670C	-0.67547	0.0192303	0.254935	0.806883	-1.0899	0.0328177	576.971	-0.165502	0.696224	559.294	-0.167293	0.654343	1205.74	-0.814473	0.000653081	944.126	-0.0740564	0.869306	944.126	1.05052	0.00248945	944.126	1.12457	0.00443445	774.611	0.865712	0.00417877	774.611	0.68121	0.0213864	774.611	-0.184502	0.635142	767.925	0.181889	0.572646	767.925	0.876158	0.000122536	767.925	0.69427	0.00333871	698.336	0.205867	0.612594	698.336	0.274469
C2_01540W		C2_01540W	1.29749	8.29666e-10	-1.61839	0.00465793	-1.08877	0.0023664	537.999	0.702097	0.0442797	1933.51	1.38488	6.0308e-05	2121.41	0.869952	1.41739e-05	34888.9	3.24717	4.59215e-22	34888.9	3.20305	1.28578e-21	34888.9	-0.0441213	0.951445	21162	0.340007	0.331292	21162	0.858131	0.00339594	21162	0.518124	0.123185	874.417	1.61402	5.53705e-08	874.417	1.41582	7.66475e-07	874.417	-0.198208	0.566159	2312.93	2.3125	1.5197e-15	2312.93	1.62781
C1_07220W		C1_07220W	-2.01753	7.74613e-31	-1.77361	1.17759e-06	-1.06467	0.0128388	16287.2	-1.61939	8.52117e-08	16814.1	-1.21963	7.18205e-11	32051.6	-1.46003	2.7831e-19	16850.8	0.407079	0.214385	16850.8	0.97092	0.00111544	16850.8	0.563841	0.146706	7515.47	0.658836	0.0216327	7515.47	1.97155	7.91732e-15	7515.47	1.31271	1.22558e-06	27379.3	0.165083	0.587212	27379.3	0.479183	0.0328281	27379.3	0.3141	0.192472	12552.8	0.596969	0.0375346	12552.8	0.692559
C7_02460C		C7_02460C	-1.2182	4.74829e-17	-0.987619	0.0220577	-1.0571	0.00987576	1392.82	-0.722651	0.00308845	1208.11	-0.77309	0.000115127	2144.79	-1.45995	5.05623e-18	2823.87	-0.141189	0.621612	2823.87	-0.0999052	0.727375	2823.87	0.0412836	0.930319	1601.38	0.0988829	0.76117	1601.38	0.106128	0.712656	1601.38	0.0072451	0.982938	1842.16	0.0398191	0.890495	1842.16	0.401713	0.0381201	1842.16	0.361894	0.0732774	1136.07	0.0184368	0.962274	1136.07	-0.284585
C4_06120W	GDH3	C4_06120W	-0.218954	0.821259	-3.11517	1.3215e-12	-0.97196	0.0159967	13641.7	0.553454	0.106474	35395	-0.476632	0.226065	44512.7	-0.168993	0.566339	47691.2	3.39069	1.58648e-18	47691.2	3.55412	2.11738e-20	47691.2	0.163434	0.819105	20178.4	0.502771	0.204945	20178.4	2.84834	1.60924e-18	20178.4	2.34557	4.69549e-12	29707	2.12478	4.61788e-13	29707	1.63473	1.61463e-08	29707	-0.490049	0.129182	31748.2	1.11371	0.00115694	31748.2	0.953343
CR_00680W	BUD22	CR_00680W	-0.0604312	0.832491	0.258512	0.832472	-0.932662	0.043215	1113.41	0.595322	0.115856	936.525	0.456399	0.0896588	2295.24	-0.741199	2.23571e-05	2358.3	0.133286	0.772542	2358.3	0.861387	0.0220955	2358.3	0.728101	0.120127	2337.96	0.46073	0.102697	2337.96	0.0308582	0.92382	2337.96	-0.429872	0.142107	1237.97	0.059215	0.870563	1237.97	1.23807	6.72622e-08	1237.97	1.17886	4.78401e-07	1496.57	-0.0472651	0.920032	1496.57	-0.0417478
CR_07250C		CR_07250C	0.201371	0.42709	-0.10078	0.933319	0.859571	0.0422619	6284.11	-0.239777	0.41751	6003.03	-0.0958174	0.733961	6287.33	0.891347	6.00795e-07	3728.04	0.502895	0.194476	3728.04	-0.00452582	0.992578	3728.04	-0.507421	0.309091	5646.78	0.20998	0.407227	5646.78	0.694129	0.000726077	5646.78	0.484149	0.0341211	5475.1	0.0931143	0.756227	5475.1	-1.0863	6.81912e-08	5475.1	-1.17941	7.00103e-09	7199.04	0.262467	0.215041	7199.04	0.0939194
CR_04660C	UGP1	CR_04660C	0.231084	0.18548	0.302851	0.730806	0.881307	0.0254032	6204.81	0.333495	0.234452	3452.08	-0.0837052	0.753894	5876.4	0.365153	0.080527	4508.42	-0.924622	0.00186623	4508.42	-1.94357	4.01009e-12	4508.42	-1.01895	0.00223703	6971.4	-0.844987	6.49767e-06	6971.4	-1.25123	1.99139e-12	6971.4	-0.406245	0.050979	4244.46	-0.402834	0.0972527	4244.46	-0.555225	0.00822577	4244.46	-0.152392	0.534888	6078.03	-0.794884	9.71086e-06	6078.03	-0.473344
CR_09070C		CR_09070C	-0.458552	0.0980578	0.398846	0.562845	0.899708	0.0411151	6271.2	0.216767	0.468255	1256.01	-0.93637	0.00978509	1898.41	-0.484665	0.0181645	4504.58	-2.76645	6.16739e-22	4504.58	-3.01277	4.21514e-26	4504.58	-0.246322	0.622195	4896.58	-1.90141	1.98758e-15	4896.58	-1.61423	1.22065e-11	4896.58	0.287181	0.353677	2962.04	-1.59064	3.6594e-07	2962.04	-1.84828	4.98995e-10	2962.04	-0.257641	0.471397	3427.9	-2.71647	3.22256e-54	3427.9	-2.4998
C1_10100C	NTF2	C1_10100C	-0.114797	0.646867	-0.0768238	0.928284	0.921717	0.0346409	5229.24	0.195633	0.476632	4155.12	0.0679249	0.831805	7616.44	0.194887	0.322999	6289.36	-0.0771561	0.804091	6289.36	-0.724964	0.00291541	6289.36	-0.647808	0.0245659	8830.43	-0.0286805	0.930609	8830.43	0.357115	0.12442	8830.43	0.385796	0.127299	4691	-0.0393388	0.881243	4691	0.0845643	0.669179	4691	0.123903	0.546337	6411.5	-0.141367	0.640077	6411.5	0.133685
CR_02380C		CR_02380C	-0.0581152	0.891417	-0.588279	0.455482	0.980554	0.0274067	1181.26	-0.489956	0.172022	589.084	-0.452229	0.0936987	747.97	1.11254	5.27193e-05	667.835	-0.267616	0.491237	667.835	-0.503494	0.165289	667.835	-0.235878	0.672347	924.901	-0.787407	0.000794231	924.901	0.576808	0.0117936	924.901	1.36421	1.69717e-09	799.64	-0.793046	0.0056855	799.64	-2.00371	1.73199e-15	799.64	-1.21066	4.39277e-06	896.91	-0.729708	0.0194359	896.91	-0.3515
C2_05930W	COX9	C2_05930W	0.159434	0.49289	0.0569474	0.948379	1.02276	0.038666	12396.9	0.154717	0.641209	8570.53	0.127004	0.644518	9092.22	0.0420113	0.857393	9668.79	-0.409831	0.0861628	9668.79	-1.36847	1.66014e-10	9668.79	-0.958641	8.68839e-05	14616.3	-0.501549	0.0904188	14616.3	-0.459924	0.100203	14616.3	0.0416247	0.918501	8828.11	-0.29124	0.199188	8828.11	-0.846045	3.71433e-06	8828.11	-0.554805	0.00375673	11721.1	-0.295232	0.228874	11721.1	-0.910035
C7_02220C		C7_02220C	1.09091	3.85004e-09	0.731439	0.163241	1.06657	0.0160332	1558.73	0.211393	0.615075	1805.22	-0.180975	0.544758	1700.75	0.517491	0.0157314	1048.88	0.977107	0.00244237	1048.88	0.926329	0.00399187	1048.88	-0.0507784	0.936016	2438.72	0.627478	0.00192961	2438.72	0.942776	5.85683e-07	2438.72	0.315299	0.162416	1492.88	0.635103	0.0016277	1492.88	-0.505379	0.0078448	1492.88	-1.14048	6.42003e-10	1988.98	0.263611	0.513283	1988.98	-0.15735
CR_00780C	GSY1	CR_00780C	0.393917	0.0817441	-0.306168	0.667505	1.07008	0.0194311	12674.2	-0.0990768	0.758537	6767.83	-0.235676	0.30113	7462.5	0.246325	0.188917	9161.89	-0.21482	0.537586	9161.89	-0.83951	0.00504831	9161.89	-0.62469	0.0949479	14535.7	-0.906209	0.000659468	14535.7	-0.122336	0.69193	14535.7	0.783873	0.00452156	8447.99	-0.614524	0.00169688	8447.99	-1.39979	1.12995e-15	8447.99	-0.785271	1.72047e-05	9845.36	-0.727241	6.94715e-06	9845.36	-1.00629
CR_00990W		CR_00990W	0.337286	0.181994	-1.0722	0.115436	1.07386	0.00996444	1707.17	0.465082	0.0811311	1446.93	0.325527	0.141969	2274.18	1.55477	1.7848e-12	1596.75	-0.0676188	0.883567	1596.75	-0.58388	0.125418	1596.75	-0.516261	0.298451	2298.58	-1.46297	1.98661e-08	2298.58	0.196954	0.517214	2298.58	1.65993	2.82487e-10	1198.16	0.0669537	0.821168	1198.16	-0.77088	9.8459e-05	1198.16	-0.837833	2.99849e-05	2467.25	-0.0461436	0.91489	2467.25	0.370677
C1_12850W	BLP1	C1_12850W	0.297874	0.169426	-0.268082	0.795507	1.08992	0.0114349	176271	-0.149042	0.712154	67271.7	0.0169214	0.967119	42792.8	0.839439	5.86188e-06	75309.3	-0.128822	0.760606	75309.3	-0.827454	0.0168146	75309.3	-0.698633	0.103274	116916	-0.684601	0.00951158	116916	0.00606898	0.986455	116916	0.69067	0.0104359	90628.3	-1.24437	6.08865e-06	90628.3	-3.05315	5.21261e-34	90628.3	-1.80878	3.7712e-12	110471	-1.05308	8.51612e-09	110471	-2.01447
C2_10110W	CYC1	C2_10110W	0.117414	0.70898	-0.368939	0.455482	1.13223	0.0343341	6256.06	1.48542	6.71767e-10	5483.08	0.502378	0.0338788	5568.61	0.63415	9.68957e-05	5129.18	0.788899	0.00317533	5129.18	-0.34712	0.233597	5129.18	-1.13602	7.32684e-05	7311.35	0.312288	0.383586	7311.35	0.709344	0.0184161	7311.35	0.397056	0.262538	3737.52	0.690768	0.00159999	3737.52	-0.0511391	0.830166	3737.52	-0.741907	0.000314823	8382.95	-0.261053	0.339089	8382.95	-0.847362
C2_06570C		C2_06570C	-0.884056	8.57295e-05	-0.88537	0.189065	1.13319	0.0110013	57281.9	-0.863472	0.0110919	38622	-0.948252	0.000122086	54452.2	0.909509	0.00010972	9660.79	0.0803111	0.846712	9660.79	0.704499	0.0350049	9660.79	0.624188	0.133197	14966.2	0.0882718	0.847369	14966.2	2.76174	2.34271e-19	14966.2	2.67346	2.1739e-17	51069.7	-0.310548	0.398149	51069.7	-1.42514	2.10741e-07	51069.7	-1.1146	7.96873e-05	48044.4	-0.371764	0.290813	48044.4	0.400209
C1_01620C		C1_01620C	0.0857107	0.800767	0.243114	0.678259	1.14459	0.0311542	5640.4	0.946867	0.0025122	5692.93	1.10798	1.84182e-05	4751.65	1.30856	1.04317e-14	2203.34	-0.0672093	0.849893	2203.34	-1.03323	0.00014565	2203.34	-0.966017	0.00188355	3555	0.100097	0.792851	3555	0.0684633	0.84521	3555	-0.0316342	0.939345	3192.39	0.134226	0.727001	3192.39	-0.952063	0.000302379	3192.39	-1.08629	4.47152e-05	8333.69	0.317246	0.313131	8333.69	-0.543667
C4_02220C	ZCF25	C4_02220C	2.71855	4.80345e-23	1.53593	0.000124773	1.16515	0.0194311	425.305	2.26506	2.21065e-10	621.112	0.947528	0.000487147	1207.6	0.73216	9.49462e-05	240.113	1.79373	2.19279e-07	240.113	2.01225	3.02384e-09	240.113	0.218515	0.707664	875.749	0.622681	0.0451152	875.749	0.503504	0.0924008	875.749	-0.119177	0.772415	413.692	1.76276	2.4163e-07	413.692	2.1732	1.38478e-11	413.692	0.410442	0.26153	1075.38	0.468453	0.0458609	1075.38	0.688194
C5_04380C		C5_04380C	2.11961	0.000586565	-0.327653	0.774663	1.17014	0.00743201	614.449	2.56943	2.88681e-25	1024.95	-0.206755	0.700003	2036.55	0.837009	0.000239677	2503.35	-3.50341	1.36259e-14	2503.35	-2.9961	4.85848e-11	2503.35	0.507307	0.48431	11575.8	-5.94569	3.09103e-97	11575.8	-3.90813	2.42013e-42	11575.8	2.03756	3.52874e-11	801.342	2.85905	1.60275e-14	801.342	2.58362	1.36403e-12	801.342	-0.275421	0.530737	1587.24	0.107241	0.76154	1587.24	0.901659
C4_04850C	CSR1	C4_04850C	-0.68516	0.00497438	0.53381	0.592701	1.19829	0.0114349	1785.26	-1.04646	0.00275323	1532.69	-0.82576	0.00312645	2466.2	-0.781722	2.12874e-05	3203.6	-1.02069	0.0138063	3203.6	-2.60496	1.07223e-11	3203.6	-1.58428	0.000379384	3973.33	0.20828	0.602602	3973.33	-0.681103	0.0322666	3973.33	-0.889383	0.00742466	2209.36	-0.0717136	0.873283	2209.36	-0.0846814	0.806427	2209.36	-0.0129678	0.973055	1471.62	0.173149	0.625856	1471.62	0.226867
C7_02290W		C7_02290W	-0.562435	0.0123256	-0.455856	0.566043	1.19853	0.0425579	1338.6	-0.841343	0.00381083	1352.57	-0.822404	0.000571386	1489.32	0.435619	0.0486827	1250.23	-0.211015	0.586015	1250.23	-0.474553	0.183063	1250.23	-0.263537	0.619813	1734.87	-0.0955103	0.83923	1734.87	1.32859	4.77053e-05	1734.87	1.4241	2.99163e-05	1478.28	0.23518	0.448038	1478.28	-0.89825	0.000101524	1478.28	-1.13343	1.08577e-06	1305.47	0.274612	0.391058	1305.47	0.424502
CR_09560C		CR_09560C	0.282484	0.271808	0.750005	0.435495	1.22166	0.00624593	1801.11	-0.632272	0.118432	1177.53	-0.89194	0.000128915	1229.26	0.991315	1.79002e-06	806.583	-1.4514	8.76635e-06	806.583	-1.6048	6.03823e-07	806.583	-0.153409	0.792017	1487.98	-0.975914	0.00646604	1487.98	-0.623289	0.0799767	1487.98	0.352625	0.41428	1451.84	-0.288685	0.416127	1451.84	-1.8692	6.88934e-13	1451.84	-1.58051	3.08802e-09	1388.26	-0.526519	0.102077	1388.26	-0.20066
CR_04480C	LAP3	CR_04480C	-0.403203	0.153883	0.425757	0.79723	1.22333	0.0318718	5585.18	-0.355897	0.77752	7392.73	-1.01702	0.00189009	6532.33	-0.270626	0.194329	21695.6	-2.1914	1.65335e-05	21695.6	-3.83244	3.8238e-15	21695.6	-1.64104	0.00550348	24420.9	-1.35307	0.000682097	24420.9	-2.16865	5.59774e-09	24420.9	-0.81558	0.0596643	7304.37	0.881429	0.127744	7304.37	-0.270088	0.627741	7304.37	-1.15152	0.0242537	5820.17	0.237441	0.79247	5820.17	-0.146052
C3_01930W	PXP2	C3_01930W	1.41364	7.6763e-08	0.424042	0.619468	1.22847	0.0462801	1765.71	1.65692	1.24627e-06	1621.05	0.865109	0.00119711	3157.08	0.750779	0.000610614	4606.87	-0.439962	0.414761	4606.87	-1.50341	0.00149445	4606.87	-1.06345	0.0722221	11841.5	-1.4228	1.36801e-07	11841.5	-1.65442	2.34108e-10	11841.5	-0.231621	0.511936	1239.61	0.661978	0.0523451	1239.61	1.00981	0.000661185	1239.61	0.347834	0.298746	3123.93	-0.114533	0.811883	3123.93	0.146642
C6_03270C	AYR2	C6_03270C	0.712802	0.00375049	-0.271331	0.795507	1.23611	0.029193	2729.88	0.188767	0.570504	1382.19	0.111319	0.720268	2080.61	0.923622	4.0433e-05	1922.17	-0.840872	0.0367297	1922.17	-1.84047	9.0303e-07	1922.17	-0.999595	0.0314135	3463.94	-1.81352	1.30428e-09	3463.94	-1.28223	1.7185e-05	3463.94	0.531291	0.131605	1633.5	-0.7152	0.00771084	1633.5	-1.2882	6.25864e-08	1633.5	-0.573002	0.0257598	2550.54	-0.76849	7.49476e-05	2550.54	-0.504694
C1_14480W		C1_14480W	1.54699	0.000433949	-2.15323	0.0217936	1.2371	0.0255978	349.084	0.855665	0.0320544	316.332	0.0286547	0.958568	433.737	2.04771	1.72304e-10	531.708	1.99823	0.000114073	531.708	0.954385	0.0849611	531.708	-1.04385	0.117096	777.304	-1.68315	0.00307568	777.304	0.681649	0.248704	777.304	2.3648	2.16509e-05	233.996	0.557968	0.226867	233.996	-1.01916	0.00774527	233.996	-1.57713	3.07486e-05	519.333	-0.245533	0.607188	519.333	0.220795
C7_03200C		C7_03200C	-0.0251228	0.955196	0.117357	0.945073	1.25111	0.0178428	698.708	0.836111	0.00437764	1071.39	0.0135804	0.978297	3001.15	0.573783	0.00791943	1124.17	-1.10825	0.0103225	1124.17	0.495184	0.289965	1124.17	1.60343	0.000604666	2303.08	-0.955554	0.0162855	2303.08	1.81608	4.63009e-07	2303.08	2.77164	2.92856e-14	1112.43	1.31654	2.58326e-06	1112.43	1.80785	4.56002e-12	1112.43	0.491317	0.0897614	1865.93	0.521412	0.0761934	1865.93	1.59714
CR_07270C	HGT16	CR_07270C	0.930165	2.76241e-06	0.376661	0.701872	1.25256	0.000585473	2032.69	0.371211	0.32675	1710.9	-0.409339	0.0824653	2034.46	1.18873	1.83185e-08	1352.99	-0.27968	0.520324	1352.99	-1.35848	0.000215043	1352.99	-1.0788	0.0126747	2868.07	-0.823302	7.00367e-05	2868.07	-0.996731	4.47859e-07	2868.07	-0.173429	0.512098	1573.23	0.365283	0.172841	1573.23	-0.974022	8.03463e-06	1573.23	-1.33931	8.98251e-10	2364.13	-0.394554	0.243564	2364.13	-0.110267
CR_09570W		CR_09570W	0.345401	0.0943962	0.230213	0.880019	1.27264	0.0114349	3663.11	-0.447544	0.296083	1589.85	-0.536141	0.0217194	1584.74	1.4926	9.29133e-09	2134.61	-1.59711	2.89297e-05	2134.61	-1.8234	1.20025e-06	2134.61	-0.22629	0.729477	3723.92	-1.70403	5.0821e-06	3723.92	-0.855211	0.0249688	3723.92	0.848819	0.0395896	2229.21	-0.939998	0.00278901	2229.21	-2.80528	4.11254e-24	2229.21	-1.86529	7.56681e-11	2452.98	-1.00708	0.000590112	2452.98	-0.818155
C4_00720W	CSP2	C4_00720W	-0.645049	0.000883148	-0.461244	0.717632	1.27863	0.00895965	3673.01	-1.06343	2.14703e-05	1799.99	-1.10948	0.000822279	1760.37	0.724194	0.0101818	1501.2	-0.367085	0.431943	1501.2	-0.147441	0.764523	1501.2	0.219644	0.753643	2312.61	-0.172884	0.719298	2312.61	1.82094	1.19709e-07	2312.61	1.99383	2.23822e-08	2793.99	-0.78743	0.0231888	2793.99	-2.36317	1.90046e-15	2793.99	-1.57574	3.22049e-07	2061.03	-0.807174	0.00953413	2061.03	-0.522414
CR_09580C		CR_09580C	0.0627237	0.840086	0.269747	0.707893	1.29915	0.000234219	3216.4	0.855137	0.00632187	1755.88	-0.456645	0.147117	2922.59	-0.0479365	0.881508	1900.5	-0.907754	0.000675109	1900.5	-1.47456	7.91287e-09	1900.5	-0.566802	0.0930865	3115.21	-0.691846	0.00119115	3115.21	-0.19258	0.409001	3115.21	0.499265	0.0275262	2164.28	0.0517244	0.89955	2164.28	-0.0842605	0.791081	2164.28	-0.135985	0.681543	3091.03	-1.24114	7.24113e-06	3091.03	-0.94337
C2_08290C	UCF1	C2_08290C	0.554663	0.0268123	-0.779855	0.316519	1.31971	0.00743201	206422	0.0574478	0.878355	104139	0.259225	0.203615	91591.8	0.502084	0.018664	95885.4	0.61367	0.171487	95885.4	-0.684469	0.122854	95885.4	-1.29814	0.0060553	143719	-0.711781	0.0231328	143719	0.121864	0.729039	143719	0.833644	0.00788248	116808	-0.866507	5.22544e-05	116808	-1.87458	7.90781e-22	116808	-1.00808	7.75623e-07	162976	-0.639466	0.00124761	162976	-1.37888
C3_02660W		C3_02660W	1.04518	0.0162076	-0.0371986	0.977254	1.32187	0.0188978	209.176	1.94616	4.55808e-08	655.907	0.372936	0.445362	547.59	1.64418	7.96726e-09	197.618	1.65288	7.18299e-07	197.618	1.30275	0.000110167	197.618	-0.350129	0.491633	409.094	0.582971	0.0981082	409.094	1.62177	9.7206e-08	409.094	1.0388	0.00159309	301.282	2.95815	1.10804e-12	301.282	1.16222	0.00646459	301.282	-1.79593	1.26253e-05	702.612	1.4095	2.37945e-08	702.612	0.91004
C2_10150W		C2_10150W	0.673645	0.0699348	0.565261	0.415819	1.32622	0.0446207	172.166	0.96494	0.116077	403.534	-0.411	0.19997	838.5	1.4337	1.91619e-09	269.798	0.741823	0.0306329	269.798	0.973952	0.00312057	269.798	0.232129	0.668932	635.117	0.643127	0.120696	635.117	1.66975	3.1383e-06	635.117	1.02663	0.00932162	312.808	2.20712	5.16529e-08	312.808	1.49728	0.000158892	312.808	-0.709846	0.0928743	597.415	0.853366	0.00181269	597.415	2.01249
C7_01540W	ALK6	C7_01540W	1.61423	0.00990013	0.547284	0.452036	1.34836	0.0346711	159.215	1.36879	0.00320891	185.926	0.568624	0.204199	475.054	0.891857	0.00135626	203.006	2.67827	3.66303e-08	203.006	2.93113	9.48594e-10	203.006	0.25286	0.763065	522.54	1.6246	1.36343e-05	522.54	2.7081	1.04958e-14	522.54	1.0835	0.00535122	160.767	0.979152	0.0349101	160.767	1.44504	0.000334468	160.767	0.465888	0.302324	366.85	0.195626	0.66923	366.85	1.01257
C3_05060W		C3_05060W	-0.187247	0.526275	-0.48198	0.598555	1.45921	0.0114901	793.209	0.384624	0.342895	857.39	0.156358	0.559183	1090.48	0.661011	0.00107458	1269	1.19652	0.0012973	1269	-0.430448	0.298312	1269	-1.62697	4.62547e-05	1735.72	0.911576	0.0177497	1735.72	1.26188	0.000392194	1735.72	0.350304	0.444813	714.273	0.463388	0.0701583	714.273	-0.162165	0.510456	714.273	-0.625554	0.0057766	1140.61	0.254583	0.457346	1140.61	0.158674
C1_05840W	PRN1	C1_05840W	0.875589	0.00306716	0.0418582	0.986571	1.46509	0.0128388	545.341	2.82227	2.73458e-18	672.442	-0.030439	0.948569	1536.17	-0.289373	0.31388	924.948	2.12909	5.65538e-07	924.948	2.66343	1.5224e-10	924.948	0.534344	0.400361	2283.55	1.30454	0.0210871	2283.55	3.28551	7.7026e-11	2283.55	1.98097	0.000291269	684.926	2.55856	5.91678e-15	684.926	3.18506	6.09459e-24	684.926	0.626494	0.0700122	1064.47	-0.262456	0.469169	1064.47	0.133406
CR_09600C	YKE2	CR_09600C	-0.12039	0.527933	0.761759	0.145344	1.50821	0.0114349	15154.5	0.439876	0.201645	7977.31	-0.170869	0.662879	11721.8	-0.248654	0.188203	12444	-1.1569	8.80311e-05	12444	-2.2903	2.89969e-16	12444	-1.1334	0.000589174	20478	-0.266902	0.567499	20478	-0.615383	0.108823	20478	-0.348481	0.455022	10146.9	-0.379939	0.155648	10146.9	-0.473343	0.0389831	10146.9	-0.0934046	0.733936	13189.7	-0.972852	0.0017911	13189.7	-1.11804
CR_02820W	PGM2	CR_02820W	0.137016	0.468746	0.231435	0.759431	1.52851	0.000197242	28192	-0.462728	0.151285	7628.34	0.350916	0.250009	7547.45	1.17818	4.07708e-10	6842.72	-1.12553	0.000540596	6842.72	-1.87185	1.79874e-09	6842.72	-0.746325	0.0649996	11530.5	-1.02136	9.87212e-07	11530.5	-0.442026	0.0403459	11530.5	0.579335	0.010209	13912.3	-2.05879	7.92048e-15	13912.3	-3.27798	4.78808e-38	13912.3	-1.21918	6.22003e-06	15964.5	-1.21973	2.51761e-11	15964.5	-1.58728
C6_03260W		C6_03260W	-0.152323	0.610658	0.176811	0.856194	1.55802	0.000197242	20980.8	-0.0709993	0.86664	6570.45	-0.618495	0.0210347	8039.83	0.113236	0.684514	6174.93	-1.39789	1.59817e-07	6174.93	-1.95684	4.63692e-14	6174.93	-0.558945	0.110776	9485.15	-1.06143	0.00197363	9485.15	-0.205052	0.596907	9485.15	0.856381	0.0173044	11546.4	-1.20773	5.1527e-06	11546.4	-1.93603	3.57572e-15	11546.4	-0.728305	0.00588408	12602.2	-1.72978	3.55071e-16	12602.2	-1.70352
CR_01810C		CR_01810C	0.215291	0.713775	1.09831	0.288901	1.57891	0.0222055	210.342	0.836048	0.0787092	289.112	0.0882424	0.845871	689.465	-0.841382	0.000413472	202.432	1.34109	0.0146361	202.432	-0.811053	0.167039	202.432	-2.15214	0.000289917	491.607	2.23033	4.00734e-11	491.607	0.596381	0.105339	491.607	-1.63395	3.03758e-06	356.553	1.11822	0.000261077	356.553	2.09215	2.3401e-14	356.553	0.973927	0.000628873	380.966	0.389225	0.35986	380.966	0.454315
C1_04590W		C1_04590W	-0.566331	0.00268087	0.0442783	0.980425	1.59452	2.07088e-06	51315.6	-0.296983	0.326352	35672.1	-0.549018	0.017953	48652	0.32385	0.259777	17904.3	-1.34446	4.36595e-05	17904.3	-1.56047	1.32689e-06	17904.3	-0.216001	0.69914	26308.2	-0.724194	0.0649628	26308.2	0.643443	0.0844681	26308.2	1.36764	0.000214499	43622.7	-0.19146	0.545339	43622.7	-0.848134	0.00021135	43622.7	-0.656674	0.00571205	46426.6	-0.421195	0.200069	46426.6	-0.179035
C7_02240W	FMP45	C7_02240W	1.13375	5.86574e-05	0.718439	0.462056	1.61838	0.00479006	2281.12	2.52551	3.62562e-25	1983.36	1.32721	2.59503e-10	2846.2	-0.0816511	0.733977	1055.4	1.44684	0.0040951	1055.4	-1.3672	0.00698459	1055.4	-2.81403	6.03114e-08	2422.08	1.0405	0.000754173	2422.08	-0.833838	0.00592919	2422.08	-1.87434	3.51313e-10	1309.25	0.970569	0.000225919	1309.25	1.65844	4.36591e-12	1309.25	0.687871	0.00701565	3574.26	-0.207231	0.429763	3574.26	-0.902862
C4_02190C		C4_02190C	3.33145	0.124477	2.02019	5.44271e-06	1.64356	0.00638948	60.7927	2.68132	0.00934763	91.9768	2.39673	2.81586e-06	469.596	1.66209	1.58524e-10	134.791	4.35689	1.27056e-07	134.791	3.17878	0.000154513	134.791	-1.17811	0.307806	647.973	3.06466	2.21216e-10	647.973	1.54047	0.00186412	647.973	-1.52419	0.00362698	68.1491	1.06783	0.261836	68.1491	3.3275	5.38302e-06	68.1491	2.25967	0.00245397	316.619	0.807935	0.102405	316.619	2.35107
C4_02610C	SUL2	C4_02610C	0.255678	0.714732	0.891375	0.449734	1.7358	0.0035399	205.507	2.01595	9.41482e-09	358.598	1.45679	1.80123e-08	475.512	1.53277	1.99656e-11	164.287	0.341648	0.610628	164.287	0.501902	0.4342	164.287	0.160255	0.878279	445.829	0.992039	0.0336562	445.829	2.01663	1.38969e-06	445.829	1.02459	0.0291121	153.419	1.45927	2.32534e-05	153.419	1.12433	0.000576318	153.419	-0.334933	0.35643	568.776	0.919434	9.92826e-05	568.776	0.684445
C2_00860C		C2_00860C	-1.3454	0.0293098	0.632418	0.725524	1.84312	6.74776e-09	1480.38	-0.281913	0.832575	1710.63	-0.877564	0.0186485	1546.96	-1.33121	7.80539e-08	6727.89	-1.32709	0.0235922	6727.89	-4.12045	1.21856e-14	6727.89	-2.79335	3.0668e-06	6750.58	0.664145	0.235063	6750.58	-0.887154	0.077396	6750.58	-1.5513	0.00232201	1846.82	0.670673	0.465449	1846.82	-0.0133431	0.986226	1846.82	-0.684016	0.386642	1316.46	0.0980649	0.856695	1316.46	-1.01643
C4_01160W	CRD2	C4_01160W	0.821977	0.026467	-0.782378	0.551838	1.93497	2.08624e-05	1568.71	1.21839	2.3581e-08	3439.32	0.105097	0.683002	3372.11	2.16922	8.42627e-31	1461.71	2.47955	5.44317e-10	1461.71	0.903544	0.03739	1461.71	-1.57601	0.0006342	2553.61	0.887506	0.126837	2553.61	2.05554	4.90122e-05	2553.61	1.16803	0.0412746	1812.27	2.03975	1.87093e-26	1812.27	-0.0788026	0.732387	1812.27	-2.11855	2.4997e-29	4050.77	0.950199	1.73901e-06	4050.77	0.918
C2_02590W	ZRT2	C2_02590W	-0.530206	0.0664539	1.00369	0.455293	2.09816	2.70626e-07	21461.4	-0.685123	0.167411	25527	-1.26496	0.0410843	27973.4	-1.12123	4.81243e-07	44777.2	-0.63455	0.236975	44777.2	-3.09094	2.42997e-11	44777.2	-2.45639	1.71856e-06	75916.9	0.912688	0.0882399	75916.9	-0.424721	0.437762	75916.9	-1.33741	0.0100479	30589.9	0.668159	0.345372	30589.9	0.0739109	0.90765	30589.9	-0.594248	0.344808	18228.2	0.112811	0.841558	18228.2	-0.313593
C2_02180W		C2_02180W	-0.300705	0.359901	-0.124925	0.934013	2.45935	8.90188e-11	10472.9	-1.27591	2.48875e-06	6886	-1.36188	2.45432e-05	4270.42	-0.00488932	0.990573	18191.8	-0.217623	0.703591	18191.8	-2.90008	5.67437e-11	18191.8	-2.68246	2.98884e-08	25694.9	-0.0298092	0.951949	25694.9	-0.0952001	0.812798	25694.9	-0.0653909	0.895321	9363.87	-0.356112	0.360115	9363.87	-2.25333	6.43506e-15	9363.87	-1.89722	1.40928e-10	5333.32	-0.418007	0.292633	5333.32	-0.932486
C4_06970C	ZRT1	C4_06970C	-0.223353	0.805483	0.695825	0.709993	2.80257	2.654e-12	7275.38	-0.877391	0.481418	11528.3	-1.26385	0.0784529	7805.05	-0.569295	0.0542119	23242.2	-0.696757	0.276102	23242.2	-3.79648	3.83328e-12	23242.2	-3.09973	2.56456e-07	38951.7	0.236802	0.837407	38951.7	-0.728987	0.431276	38951.7	-0.965789	0.338696	11166.2	1.01073	0.198123	11166.2	-0.475466	0.509866	11166.2	-1.48619	0.0281739	6878.04	0.643749	0.479711	6878.04	-0.122706
C4_06980W	PRA1	C4_06980W	-0.255894	0.768539	1.03072	0.530818	2.87464	4.99204e-13	20894.9	-0.471862	0.741317	40479.9	-1.44761	0.0366546	22516.9	-0.75682	0.115228	96625.3	-1.38463	0.0207765	96625.3	-4.83028	5.67911e-19	96625.3	-3.44566	8.94574e-09	153164	-0.0838078	0.946188	153164	-1.65947	0.0502954	153164	-1.57566	0.0899253	36158.2	1.50851	0.061414	36158.2	-0.239886	0.769074	36158.2	-1.7484	0.0165731	21469.6	0.551554	0.596057	21469.6	-0.481235
C1_13870W	MET3	C1_13870W	1.20533	0.101137	0.698867	0.626021	2.90359	0.00545646	689.614	2.55671	1.22782e-08	883.716	3.10351	6.89928e-61	758.42	2.41674	3.35413e-22	71.7757	2.29456	0.00124763	71.7757	0.771111	0.336411	71.7757	-1.52345	0.0836041	263.516	1.79635	0.0133906	263.516	2.5121	0.000190845	263.516	0.715756	0.401574	187.19	0.102362	0.881128	187.19	-0.20289	0.694005	187.19	-0.305252	0.568221	1538.31	0.681278	0.0300842	1538.31	-0.289581
C2_06630C		C2_06630C	1.28673	8.99092e-07	0.863605	0.509264	3.07954	2.654e-12	474.499	0.931752	0.0633226	807.74	-0.108791	0.773145	1749.49	1.24978	2.6321e-07	911.516	-1.24272	0.0334958	911.516	-3.51618	6.13914e-11	911.516	-2.27346	0.000258426	2854.86	-1.66142	2.65057e-05	2854.86	-1.67955	1.08316e-05	2854.86	-0.0181215	0.974143	653.269	1.58243	9.9723e-06	653.269	1.20346	0.000460829	653.269	-0.378966	0.329615	1303.57	0.563099	0.143256	1303.57	1.56876
C7_04080C		C7_04080C	5.3683	0.191576	-0.674747	0.811376	8.23851	9.22546e-05	56.7987	8.09809	6.11604e-08	41.9242	4.79613	1.34187e-07	99.656	-0.789469	0.127331	4.24799	6.44016	0.0278228	4.24799	0	1	4.24799	-6.12729	0.0826833	28.026	0.394049	0.810403	28.026	3.20931	0.00610841	28.026	2.81526	0.0246775	30.3522	3.03908	0.121919	30.3522	7.80139	2.59631e-07	30.3522	4.76231	5.2846e-06	100.778	-0.220281	0.800919	100.778	-1.02657
[truncated: 33 more columns]
