# Supplementary material for: Impaired amino acid uptake leads to global metabolic imbalance of Candida albicans biofilms
Source: NPJ Biofilms Microbiomes. 2022 Oct 13;8:78. doi: 10.1038/s41522-022-00341-9 (PMC9556537; doi:10.1038/s41522-022-00341-9)
Supplement: Supplementary file 3 — S2 Metabolomics data set [file 41522_2022_341_MOESM3_ESM.xlsx]

## Sheet: Biofilm.metabolite.results.fc.p
	log2FC.bf.stp2.Normoxia.8.h.vs.bf.WT.Normoxia.8.h	p.value.bf.stp2.Normoxia.8.h.vs.bf.WT.Normoxia.8.h	log2FC.bf.stp2.Normoxia.24.h.vs.bf.WT.Normoxia.24.h	p.value.bf.stp2.Normoxia.24.h.vs.bf.WT.Normoxia.24.h	log2FC.bf.stp2.Normoxia.48.h.vs.bf.WT.Normoxia.48.h	p.value.bf.stp2.Normoxia.48.h.vs.bf.WT.Normoxia.48.h	log2FC.bf.stp2.Hypoxia.8.h.vs.bf.WT.Hypoxia.8.h	p.value.bf.stp2.Hypoxia.8.h.vs.bf.WT.Hypoxia.8.h	log2FC.bf.stp2.Hypoxia.24.h.vs.bf.WT.Hypoxia.24.h	p.value.bf.stp2.Hypoxia.24.h.vs.bf.WT.Hypoxia.24.h	log2FC.bf.stp2.Hypoxia.48.h.vs.bf.WT.Hypoxia.48.h	p.value.bf.stp2.Hypoxia.48.h.vs.bf.WT.Hypoxia.48.h	log2FC.bf.WT.Hypoxia.8.h.vs.bf.WT.Normoxia.8.h	p.value.bf.WT.Hypoxia.8.h.vs.bf.WT.Normoxia.8.h	log2FC.bf.WT.Hypoxia.24.h.vs.bf.WT.Normoxia.24.h	p.value.bf.WT.Hypoxia.24.h.vs.bf.WT.Normoxia.24.h	log2FC.bf.WT.Hypoxia.48.h.vs.bf.WT.Normoxia.48.h	p.value.bf.WT.Hypoxia.48.h.vs.bf.WT.Normoxia.48.h	log2FC.bf.stp2.Hypoxia.8.h.vs.bf.stp2.Normoxia.8.h	p.value.bf.stp2.Hypoxia.8.h.vs.bf.stp2.Normoxia.8.h	log2FC.bf.stp2.Hypoxia.24.h.vs.bf.stp2.Normoxia.24.h	p.value.bf.stp2.Hypoxia.24.h.vs.bf.stp2.Normoxia.24.h	log2FC.bf.stp2.Hypoxia.48.h.vs.bf.stp2.Normoxia.48.h	p.value.bf.stp2.Hypoxia.48.h.vs.bf.stp2.Normoxia.48.h	log2FC.bf.WT.Normoxia.8.h.vs.RPMI.WT.Normoxia.8.h	p.value.bf.WT.Normoxia.8.h.vs.RPMI.WT.Normoxia.8.h	log2FC.bf.WT.Normoxia.24.h.vs.RPMI.WT.Normoxia.8.h	p.value.bf.WT.Normoxia.24.h.vs.RPMI.WT.Normoxia.8.h	log2FC.bf.WT.Normoxia.48.h.vs.RPMI.WT.Normoxia.8.h	p.value.bf.WT.Normoxia.48.h.vs.RPMI.WT.Normoxia.8.h	log2FC.bf.stp2.Normoxia.8.h.vs.RPMI.stp2.Normoxia.8.h	p.value.bf.stp2.Normoxia.8.h.vs.RPMI.stp2.Normoxia.8.h	log2FC.bf.stp2.Normoxia.24.h.vs.RPMI.stp2.Normoxia.8.h	p.value.bf.stp2.Normoxia.24.h.vs.RPMI.stp2.Normoxia.8.h	log2FC.bf.stp2.Normoxia.48.h.vs.RPMI.stp2.Normoxia.8.h	p.value.bf.stp2.Normoxia.48.h.vs.RPMI.stp2.Normoxia.8.h	log2FC.bf.WT.Hypoxia.8.h.vs.RPMI.WT.Normoxia.8.h	p.value.bf.WT.Hypoxia.8.h.vs.RPMI.WT.Normoxia.8.h	log2FC.bf.WT.Hypoxia.24.h.vs.RPMI.WT.Normoxia.8.h	p.value.bf.WT.Hypoxia.24.h.vs.RPMI.WT.Normoxia.8.h	log2FC.bf.WT.Hypoxia.48.h.vs.RPMI.WT.Normoxia.8.h	p.value.bf.WT.Hypoxia.48.h.vs.RPMI.WT.Normoxia.8.h	log2FC.bf.stp2.Hypoxia.8.h.vs.RPMI.stp2.Normoxia.8.h	p.value.bf.stp2.Hypoxia.8.h.vs.RPMI.stp2.Normoxia.8.h	log2FC.bf.stp2.Hypoxia.24.h.vs.RPMI.stp2.Normoxia.8.h	p.value.bf.stp2.Hypoxia.24.h.vs.RPMI.stp2.Normoxia.8.h	log2FC.bf.stp2.Hypoxia.48.h.vs.RPMI.stp2.Normoxia.8.h	p.value.bf.stp2.Hypoxia.48.h.vs.RPMI.stp2.Normoxia.8.h	log2FC.bf.WT.Normoxia.24.h.vs.bf.WT.Normoxia.8.h
N6-carboxymethyllysine	-0.73112	0.437265	0.674122	0.775583	0.939818	0.727137	2.02466	0.508179	2.29838	0.236317	1.36183	0.641474	-1.95434	0.000581433	-1.12034	0.300479	-1.28901	0.404097	0.801434	0.600647	0.503917	0.716861	-0.866991	0.532389	-1.72842	0.000209862	-2.4889	0.0312835	-1.21646	0.24255	-1.5228	0.011804	-0.878039	0.0561739	0.660103	0.0695353	-3.68276	4.12091e-06	-3.60924	1.87783e-06	-2.50546	0.00086101	-0.721366	0.58953	-0.374121	0.756502	-0.206888	0.88168	-0.76048
asparagine	0.794688	0.109766	1.49655	0.035059	-0.0267976	0.993798	-0.0337464	0.93847	1.23481	0.0280207	0.939281	0.511093	-0.406406	0.0578141	-0.976116	0.0321305	-0.108874	0.914683	-1.23484	0.0133412	-1.23785	0.00346836	0.857205	0.437459	-2.33635	7.51405e-06	-3.05646	4.29735e-06	-4.4099	0.000543381	-2.09173	3.60695e-05	-2.10998	0.000146381	-4.98676	0.000577154	-2.74276	1.63395e-08	-4.03257	1.3997e-06	-4.51877	2.61849e-06	-3.32657	8.39841e-06	-3.34783	1.21894e-08	-4.12955	2.37312e-05	-0.720107
N-acetylaspartate (NAA)	1.03154	0.148688	0.614712	0.449426	1.64655	0.522421	0.812467	0.304926	1.18105	0.0237807	0.396599	0.82479	-3.40598	6.4271e-05	-3.36679	3.34932e-06	-0.976417	0.333892	-3.62506	5.66821e-05	-2.80046	0.00054287	-2.22637	0.0371675	-2.17598	0.000215755	-1.72134	1.28538e-05	-3.34731	0.00113892	-2.2488	3.72141e-05	-2.21099	0.000834123	-2.80513	0.0001328	-5.58196	1.31306e-07	-5.08814	4.96753e-08	-4.32373	8.03522e-06	-5.87386	8.91445e-08	-5.01145	5.73295e-08	-5.03149	0.000118549	0.454634
N-acetylalanine	-0.313191	0.452702	-0.501586	0.572158	0.598315	0.730755	-0.0610243	0.912607	0.25394	0.501799	0.00837136	0.990811	-2.15437	2.63218e-05	-1.73453	0.00207672	-1.05383	0.248206	-1.9022	0.00180128	-0.979007	0.00905442	-1.64377	0.00380671	-1.5537	0.000219591	-2.00431	0.000501127	-2.72123	0.00306088	-2.1109	6.99744e-06	-2.74991	3.14345e-05	-2.36692	2.70004e-05	-3.70807	1.64513e-07	-3.73885	9.47864e-07	-3.77506	4.37875e-06	-4.0131	5.79643e-06	-3.72891	4.61944e-09	-4.01069	1.66818e-06	-0.450611
aspartate	0.138476	0.548522	0.486015	0.451542	0.147058	0.92063	-0.636999	0.0989737	0.102758	0.728376	-0.293199	0.641474	-1.95437	7.9007e-06	-2.12575	0.000475175	-1.59839	0.10178	-2.72985	1.3248e-05	-2.50901	2.4793e-06	-2.03864	0.00085551	-1.68279	1.62449e-06	-1.83608	0.000333898	-2.76613	0.00265759	-1.34261	1.58139e-05	-1.14836	0.000146381	-2.41737	0.000129929	-3.63717	1.1394e-08	-3.96184	1.22148e-07	-4.36452	4.03308e-07	-4.07246	4.01801e-08	-3.65737	2.08083e-09	-4.45601	1.15508e-08	-0.153288
alanine	-0.0172491	0.980205	-0.182386	0.800231	0.310873	0.792472	-0.358587	0.43079	0.0952071	0.675807	0.000882733	0.997711	-0.943283	0.000169154	-1.29176	0.00225593	-0.999672	0.148682	-1.28462	0.000816118	-1.01417	0.00171316	-1.30966	0.000180525	-0.806862	0.000360392	-0.678396	0.0310064	-1.17965	0.0168351	-0.996084	8.85376e-05	-1.03276	0.000816827	-1.04075	2.75408e-05	-1.75014	9.49821e-07	-1.97016	2.42193e-06	-2.17932	6.02303e-05	-2.28071	3.24672e-06	-2.04693	4.96373e-08	-2.35041	4.56466e-07	0.128466
N-acetylasparagine	1.35087	0.00493373	0.466626	0.217703	1.27568	0.131716	0.561786	0.239467	0.957016	0.00108765	0.564401	0.641074	-0.88165	0.00260466	-1.7862	2.5651e-05	-0.817317	0.221245	-1.67074	0.000292813	-1.29581	0.000117973	-1.5286	0.00270458	-0.939826	0.000338717	0.366186	0.0831207	-0.180142	0.59455	-1.23321	0.000160928	-0.811438	0.000649963	-0.548709	0.0036886	-1.82148	1.56068e-05	-1.42002	6.35612e-06	-0.997458	0.0136713	-2.90394	5.08242e-07	-2.10725	1.72555e-07	-2.07731	0.00013661	1.30601
glucosamine-6-phosphate	0.798365	0.843816	3.07031	0.104123	0.254297	0.863408	1.04883	0.521406	4.84356	0.0199277	1.03732	0.817014	1.72155	0.144574	-0.0797564	0.953464	2.76625	0.129615	1.97201	0.342836	1.6935	0.129064	3.54927	0.0894766	4.48536	0.00255274	1.49033	0.120473	0.0264949	0.960378	4.40183	0.0231495	3.67875	0.001327	-0.601099	0.41789	6.2069	8.9817e-07	1.41058	0.123727	2.79274	0.0317269	6.37384	0.000349711	5.37225	0.000490578	2.94817	0.108061	-2.99502
N-acetyl-glucosamine 1-phosphate	-0.374551	0.807637	0.618837	0.583332	0.307036	0.863408	-0.600058	0.521406	0.657107	0.185572	0.346008	0.641474	-2.32093	0.00245452	-2.21315	0.000960462	-0.878099	0.221605	-2.54644	0.0107351	-2.17488	0.00184716	-0.839128	0.226226	-0.473602	0.378973	-1.98193	0.00491383	-3.31699	0.00146136	-1.20649	0.0817711	-1.72144	0.00131365	-3.36829	8.6271e-05	-2.79453	0.000209467	-4.19509	9.19701e-07	-4.19509	1.44797e-06	-3.75293	3.76288e-05	-3.89632	6.02597e-06	-4.20742	1.41739e-05	-1.50833
N-acetylglucosamine 6-phosphate	-0.503212	0.664613	0.464528	0.699793	-0.598267	0.696003	-0.967541	0.521406	2.04659	0.159626	0.178267	0.951594	-2.3104	0.00104725	-4.13149	3.87661e-05	-2.49461	0.00551573	-2.77473	0.0251604	-2.54942	0.0360868	-1.71808	0.169954	0.0528851	0.915983	-1.60326	0.0133347	-2.76997	0.00167219	-0.824288	0.209281	-1.5127	0.012544	-3.7422	6.66533e-06	-2.25752	0.00100565	-5.73475	9.97688e-07	-5.26459	3.50935e-06	-3.59902	0.00168193	-4.06212	0.00166702	-5.46028	0.000613867	-1.65615
N-acetylglucosamine/N-acetylgalactosamine	-0.487021	0.427657	-0.314464	0.685246	-0.269162	0.863408	-1.10585	0.0989737	-0.582573	0.13999	-0.981001	0.159707	-1.45542	0.000148596	-1.41409	0.000217247	0.341353	0.469324	-2.07425	0.00141447	-1.6822	0.00206108	-0.370486	0.580391	2.55288	1.5535e-05	2.6728	2.54705e-05	0.980594	0.0249686	1.38563	0.0145729	1.67811	0.00484704	0.031203	0.968648	1.09746	0.00224161	1.25871	0.000256947	1.32195	0.00156468	-0.688617	0.133622	-0.00409051	0.993132	-0.339283	0.387243	0.119923
erythronate*	-0.170418	0.609722	-0.0890215	0.959514	0.210958	0.890957	0.238499	0.724827	0.390993	0.445315	0.0846647	0.952713	-1.00106	0.00854054	-0.98288	0.0584697	-0.232598	0.797453	-0.592142	0.226137	-0.502866	0.059447	-0.358891	0.464674	-1.73854	0.000148216	-1.09701	0.019482	-1.86787	0.0245871	-1.80328	1.86471e-06	-1.08035	0.000572175	-1.55123	3.10742e-06	-2.7396	7.0361e-06	-2.07989	0.000125591	-2.10047	0.000138319	-2.39542	0.000321792	-1.58322	8.57206e-06	-1.91012	0.00198443	0.641528
diacetylchitobiose	1.06251	0.181993	-0.30465	0.46099	0.895874	0.696003	-0.960587	0.173123	-0.984272	0.0405699	-0.445613	0.583055	1.43988	0.0013828	-0.341746	0.291434	-1.02486	0.26048	-0.583219	0.270798	-1.02137	0.00118951	-2.36635	0.000282203	-0.0977959	0.748939	1.21842	0.00228087	1.26341	0.0865088	1.42318	0.00453668	1.37224	7.91859e-06	2.61775	1.55733e-05	1.34208	0.00198325	0.876669	0.0206015	0.238548	0.44425	0.839964	0.0135369	0.35087	0.0408757	0.251407	0.199094	1.31621
threonate	-0.646451	0.640531	-0.11588	0.963302	1.25366	0.522421	0.134623	0.853392	0.509698	0.617757	0.335655	0.82479	-1.03756	0.165678	-1.62355	0.101743	-0.336182	0.726192	-0.256489	0.700035	-0.99797	0.116295	-1.25418	0.0639139	-3.07456	0.00106901	-1.54046	0.0449879	-2.80533	0.00180915	-2.89425	0.000747514	-0.829585	0.00879037	-0.724916	0.00347408	-4.11212	3.04721e-07	-3.16401	0.000342515	-3.14151	0.00014251	-3.15074	6.43387e-05	-1.82756	0.00686058	-1.9791	0.00506283	1.5341
gulonate*	1.52284	0.259745	0.568945	0.583332	1.24678	0.541075	0.22805	0.521406	0.226641	0.501799	0.33457	0.619495	-0.842244	0.205577	-2.85957	3.70969e-06	-3.4545	0.00263092	-2.13703	0.00239526	-3.20187	0.000491514	-4.36671	1.86699e-05	-4.39735	0.000148961	-2.38003	1.91931e-05	-1.7851	0.013121	-2.42908	0.000439544	-1.36565	0.016263	-0.0928858	0.761122	-5.23959	7.15269e-10	-5.23959	9.23889e-10	-5.23959	1.85462e-09	-4.56611	6.82599e-07	-4.56752	4.70367e-07	-4.45959	1.07541e-06	2.01732
3-deoxyoctulosonate	1.41257	0.109766	0.834988	0.544685	1.23554	0.590432	0.807555	0.508179	0.615647	0.179878	0.365076	0.641474	-2.35828	0.000102343	-1.48844	0.000463434	-0.596009	0.436492	-2.9633	0.00287349	-1.70778	0.0348694	-1.46647	0.0145401	-4.21115	8.80114e-06	-5.08099	7.32677e-07	-5.97342	8.8098e-05	-3.48698	2.54723e-05	-4.9344	7.70624e-05	-5.42629	2.72281e-09	-6.56943	7.85152e-11	-6.56943	1.03849e-10	-6.56943	2.13406e-10	-6.45028	4.37015e-06	-6.64218	4.95315e-08	-6.89275	7.45491e-07	-0.869842
homo-cis-aconitate	1.54199	0.24336	2.33431	0.0439124	0.769559	0.696003	1.25678	0.508179	1.03235	0.177342	0.452315	0.823517	-1.50342	0.0299936	-0.933146	0.0800078	0.541408	0.436476	-1.78863	0.102781	-2.23511	0.00716512	0.224164	0.844614	-1.81772	0.0171494	-2.388	0.0019869	-3.32114	3.6626e-05	1.08592	0.044809	1.30796	0.0173527	-1.18994	0.0788649	-3.32114	9.13277e-07	-3.32114	1.04637e-06	-2.77973	0.000380559	-0.702714	0.406373	-0.927144	0.124659	-0.965771	0.291683	-0.570278
2-acetamidobutanoate	-0.0295287	0.99316	-1.04742	0.348001	0.476415	0.696003	-0.257989	0.521406	0.10565	0.879767	-0.0161345	0.990811	-0.201269	0.738424	-0.866683	0.214325	0.3782	0.366398	-0.429729	0.410238	0.286384	0.427347	-0.11435	0.815995	-2.02004	0.00567171	-1.32819	0.0466887	-2.4793	5.47917e-05	-2.34223	0.00168036	-2.66826	1.4233e-06	-2.29554	0.000174454	-2.22131	0.000157071	-2.19487	0.000287847	-2.1011	0.00018561	-2.77196	3.08103e-09	-2.38188	7.0315e-05	-2.40989	2.2708e-05	0.691854
p-aminobenzoate (PABA)	-0.0249261	0.992404	-0.0379781	0.981268	0.465997	0.771734	-0.936622	0.131632	-0.476603	0.393087	-0.0426554	0.983163	-1.3324	0.00217975	-1.20466	0.062534	-0.998358	0.24488	-2.2441	0.00169417	-1.64329	0.00313311	-1.50701	0.00218329	-1.30051	0.00211464	-0.845083	0.132686	-0.889731	0.135565	-1.33095	0.00532188	-0.888573	0.0108292	-0.429246	0.0305692	-2.63291	2.82306e-07	-2.04975	2.7891e-05	-1.88809	0.000226942	-3.57505	3.6826e-06	-2.53186	1.59217e-05	-1.93626	0.000129125	0.455426
benzoate	0.521808	0.50957	-0.277255	0.886256	-0.350649	0.793437	-0.344195	0.509907	-0.344504	0.386109	-0.0272155	0.984655	0.0900424	0.764569	-0.656439	0.318345	-1.22758	0.0426676	-0.77596	0.0798821	-0.723687	0.115136	-0.904149	0.0537831	0.254153	0.172779	1.00094	0.0999842	1.48052	0.00179153	0.406831	0.346351	0.354558	0.449176	0.760744	0.0654787	0.344195	0.165379	0.344504	0.169973	0.252939	0.206371	-0.369129	0.0547145	-0.369129	0.0554499	-0.143406	0.572597	0.74679
biocytin	-0.29077	0.790404	-0.22606	0.884324	0.000271411	0.999796	-2.80867e-16	0.521406	-2.80867e-16	0.501799	-2.80867e-16	0.641474	-1.03303	0.0170634	-1.74964	0.00050644	-1.36804	0.078421	-0.742255	0.109865	-1.52358	0.0109446	-1.36831	0.000224199	-3.42296	3.13969e-05	-2.70634	3.89028e-05	-3.08795	0.000742704	-2.46801	0.000403151	-1.68668	0.00645804	-1.84195	3.00694e-05	-4.45599	3.16776e-12	-4.45599	3.16776e-12	-4.45599	3.17949e-12	-3.21026	1.57486e-08	-3.21026	7.08688e-09	-3.21026	2.48215e-08	0.71662
biotin	0.733511	0.269005	-0.0787622	0.959514	0.554939	0.702885	-0.113908	0.758586	0.204963	0.501799	-0.0115677	0.990811	-0.671355	0.0930685	-1.3744	0.00576569	-0.906406	0.255305	-1.51877	0.000724138	-1.09067	0.000403924	-1.47291	0.000288044	0.847688	0.0176417	1.77539	0.00100162	1.37034	0.031729	-0.792207	0.00997049	-0.676779	0.00291268	-0.448129	0.0645889	0.176332	0.384381	0.400991	0.0161573	0.463932	0.0557551	-2.31098	3.24672e-06	-1.76745	1.11917e-05	-1.92104	3.84189e-06	0.927701
deoxycarnitine	-0.86047	0.107338	-0.602006	0.413536	-0.198468	0.843898	0.904649	0.0989737	0.163913	0.783945	-0.891622	0.485764	-2.95751	2.49344e-05	-2.39581	0.000166492	-1.20476	0.0612872	-1.19239	0.00154965	-1.62989	0.00790479	-1.89792	0.00924507	-1.91632	5.21089e-05	-2.39231	4.76216e-05	-2.30349	0.000759277	-0.69509	0.0124729	-0.912614	0.0116446	-0.420256	0.0382326	-4.87383	4.6939e-08	-4.78812	4.24375e-08	-3.50826	1.67167e-07	-1.88748	1.34811e-05	-2.5425	0.00013305	-2.31817	0.00148856	-0.475987
carnitine	0.0779575	0.947445	-0.557988	0.555408	0.311771	0.835223	-0.129618	0.916041	0.691652	0.108595	-0.300041	0.851508	-3.29201	0.000333867	-5.19439	2.85076e-06	-2.23533	0.049994	-3.49958	0.0033587	-3.94475	4.09386e-05	-2.84714	0.00227819	-1.96013	0.000209662	-0.94443	0.0135245	-2.12678	0.00557776	-1.69928	0.000829855	-1.31952	0.00950782	-1.6321	5.82547e-05	-5.25214	5.54791e-06	-6.13881	3.68604e-08	-4.36211	1.60468e-05	-5.19886	0.000123237	-5.26426	4.58833e-08	-4.47925	6.91195e-05	1.0157
N-stearoyl-sphingosine (d18:1/18:0)*	-0.980944	0.452702	0.607431	0.699793	0.823403	0.734082	-0.382017	0.543758	-0.824559	0.475241	-0.656499	0.379858	0.356003	0.565017	3.72197	3.58337e-05	4.32066	0.000150935	0.95493	0.139318	2.28998	0.0435953	2.84075	0.0112784	-0.71118	0.255108	-2.25801	0.000265377	-2.39058	0.00110861	-0.29273	0.681368	-0.251187	0.816064	-0.167781	0.872665	-0.355177	0.435119	1.46396	0.0115062	1.93008	0.000883276	0.662201	0.272023	2.03879	0.0259699	2.67297	0.00118391	-1.54683
thioproline	-0.26381	0.593501	-0.0136011	0.977816	-0.515935	0.863408	-1.05847	0.0989737	-0.200081	0.830457	-0.699136	0.583055	-1.10785	0.00199462	-1.02373	0.0172768	1.47303	0.261649	-1.90252	0.000736592	-1.21021	0.0725097	1.28982	0.200965	1.26977	0.000290944	1.2286	8.1922e-05	-1.59689	0.107987	0.251308	0.191448	0.46035	0.00376336	-2.86748	0.00430054	0.161912	0.383587	0.204868	0.523985	-0.123868	0.694259	-1.65121	0.000293446	-0.74986	0.19945	-1.57765	0.00234373	-0.0411668
lauryl sulfate	-0.497733	0.606539	-0.351755	0.939454	-0.133385	0.954896	-0.0690308	0.721171	-0.0624459	0.501799	-0.0785788	0.641474	-4.05375	2.90755e-05	-2.46199	0.0365119	-1.19604	0.233546	-3.62505	3.52473e-05	-2.17269	0.0139969	-1.14123	0.152913	4.12936	3.25145e-05	2.65469	0.0244601	1.39128	0.0900716	3.70607	9.43106e-06	2.37738	0.00804854	1.33234	0.0661606	0.0756162	0.521614	0.192697	0.067901	0.195243	0.0732695	0.0810263	0.455936	0.204692	0.0101342	0.191105	0.0297874	-1.47467
2-iminopiperidine	0.458195	0.462668	0.151927	0.685246	0	NA	0	NA	0	NA	0	NA	-0.278509	0.313515	0	NA	0	NA	-0.736704	0.0126496	-0.151927	0.360806	0	NA	-2.61198	3.00966e-05	-2.89049	1.30077e-08	-2.89049	2.53961e-07	-3.18038	1.27142e-05	-3.76516	1.69588e-06	-3.91709	2.69572e-08	-2.89049	1.32432e-09	-2.89049	1.78098e-09	-2.89049	3.98767e-09	-3.91709	2.43513e-08	-3.91709	1.12163e-08	-3.91709	3.48518e-08	-0.278509
phenol red	-0.238307	0.520805	-0.498802	0.426002	0.220562	0.863408	-0.649596	0.186023	0.0571807	0.867924	-0.405919	0.583055	-2.04206	7.93365e-06	-1.92882	0.000620529	-0.945894	0.221605	-2.45335	0.000134143	-1.37284	0.000187841	-1.57238	0.000134189	0.0843255	0.640825	0.41133	0.194805	-0.129062	0.795817	-0.332404	0.0956657	-0.265894	0.155218	-0.0869222	0.584228	-1.95773	2.39443e-07	-1.51749	5.64618e-05	-1.07496	0.00195093	-2.78575	8.81426e-06	-1.63874	1.70919e-05	-1.6593	4.40158e-05	0.327005
bicine	0.519388	0.851448	1.30361	0.685246	0.683344	0.825287	0.344383	0.865788	-0.693299	0.73394	-0.306778	0.886161	-0.170688	0.888728	1.04639	0.462279	0.821739	0.547472	-0.345693	0.800487	-0.950517	0.554249	-0.168383	0.877267	0.939812	0.457175	0.175977	0.90142	0.763467	0.590195	0.51523	0.703478	0.535619	0.724774	0.502841	0.626872	0.769125	0.553558	1.22237	0.349683	1.58521	0.15946	0.169538	0.888195	-0.414898	0.766239	0.334458	0.793041	-0.763835
sulfate*	0.0379348	0.947445	-0.3658	0.514843	0.230381	0.819574	-0.407234	0.131632	-0.0412912	0.902027	-0.0423624	0.939528	-1.04295	0.000457396	-1.19864	0.00136014	-0.830678	0.123121	-1.48812	3.51414e-05	-0.874136	0.00858782	-1.10342	0.000469852	0.0840855	0.634671	0.421272	0.0993803	0.0842019	0.80372	-0.667693	0.00906662	-0.734242	0.0132004	-0.475131	0.0338699	-0.958865	5.30765e-05	-0.777373	0.000236224	-0.746476	0.00209986	-2.15581	5.84308e-06	-1.60838	0.000213791	-1.57855	0.00013661	0.337186
p-toluic acid	0.43586	0.24094	-0.114305	0.774533	-0.716491	0.541075	0.850488	0.0735862	0.206045	0.501799	-0.234581	0.641474	-0.841097	0.0103341	-0.308585	0.197081	-0.263365	0.309153	-0.426469	0.000604984	0.0117643	0.946557	0.218546	0.539041	-0.0184793	0.950365	0.0990444	0.709832	0.254916	0.335594	0.752365	0.00324432	0.319724	0.121236	-0.126591	0.732252	-0.859576	0.00845108	-0.209541	0.385217	-0.00844916	0.971932	0.325896	0.100825	0.331488	0.158803	0.0919547	0.710443	0.117524
2,4-di-tert-butylphenol	-0.0422446	0.980205	0.0407699	0.985998	1.16336	0.696003	-0.161332	0.521406	-0.376248	0.308439	-0.655102	0.409259	-0.916282	0.0113262	-1.43536	0.0456881	-0.242147	0.655492	-1.03537	0.0109505	-1.85238	0.0196782	-2.06061	0.0610297	-2.81695	0.000837235	-1.86011	0.0324986	-2.51941	0.00580296	-2.19521	0.00199617	-1.15536	0.150319	-0.692073	0.464734	-3.73323	3.53942e-05	-3.29548	0.000146325	-2.76156	0.000563163	-3.23058	3.58392e-05	-3.00774	5.88674e-05	-2.75268	0.00029424	0.956842
creatinine	0.735308	0.404312	0.054242	0.985742	0.117593	0.807241	0.234719	0.398297	0.302298	0.145569	0.103584	0.641474	-0.286059	0.426176	-0.786323	0.425406	-0.0626634	0.538758	-0.786648	0.0369182	-0.538267	0.214914	-0.0766718	0.690908	-4.73362	7.22185e-06	-4.56551	0.00156309	-5.32173	2.67896e-07	-4.7591	5.81606e-06	-5.27206	7.02597e-06	-5.96493	8.83887e-09	-5.01968	8.91617e-09	-5.35184	3.70754e-09	-5.3844	4.131e-09	-5.54574	1.99729e-09	-5.81032	2.08083e-09	-6.0416	4.4939e-09	0.168104
palmitoleoyl-oleoyl-glycerol (16:1/18:1) [2]*	-3.15804	0.211559	-1.16953	0.800231	-0.880757	0.843175	0.88172	0.521406	-0.9424	0.501799	-0.981783	0.641474	-3.11705	0.0295054	-1.03949	0.445177	1.53657	0.33612	0.92271	0.417475	-0.812355	0.654718	1.43554	0.419685	-3.01961	0.0222071	-2.41924	0.0857734	-4.90373	0.00328455	-1.89425	0.346351	0.694622	0.806062	-1.50109	0.488143	-6.13666	1.0028e-06	-3.45873	1.8688e-05	-3.36717	1.34502e-05	-0.971539	0.595414	-0.117733	0.954551	-0.0655503	0.976047	0.600369
stearoyl-linoleoyl-glycerol (18:0/18:2) [2]*	-0.818724	0.520805	-0.0692692	0.977816	0.76008	0.696003	-0.13181	0.869845	0.0676457	0.951141	0.0327767	0.986174	-2.78671	0.00119977	-2.02678	0.00816811	-1.30958	0.138406	-2.09979	0.0150756	-1.88987	0.0499977	-2.03688	0.00113927	-2.02689	0.0037541	-2.29769	0.00766452	-3.0187	0.00190689	-2.76084	0.00551044	-2.28218	0.0107995	-2.17385	0.00381331	-4.8136	3.22134e-05	-4.32447	1.03165e-05	-4.32828	5.964e-05	-4.86063	1.88054e-05	-4.17205	0.000442588	-4.21073	3.04098e-05	-0.270798
oleoyl-linolenoyl-glycerol (18:1/18:3) [2]*	-0.774063	0.520805	0.0100897	0.996242	-0.891454	0.835223	0.87031	0.521406	-0.332604	0.787776	-0.606962	0.641474	-5.37559	6.90643e-05	-2.13342	0.214544	-2.09546	0.00215209	-3.73122	0.000604984	-2.47612	0.214914	-1.81097	0.325996	0.0380905	0.98819	-1.3772	0.573212	-0.922595	0.672585	1.45839	0.499901	0.827249	0.794283	0.380309	0.894228	-5.3375	0.0169159	-3.51062	0.0825638	-3.01806	0.128064	-2.27283	0.286692	-1.64887	0.447842	-1.43066	0.51964	-1.41529
palmitoyl-linolenoyl-glycerol (16:0/18:3) [2]*	-0.447925	0.704295	0.422692	0.778771	0.706068	0.696003	0.850617	0.521406	0.322505	0.801203	-0.455278	0.70558	-4.80365	0.000277006	-3.10427	0.000695999	-2.49514	0.00240827	-3.5051	0.00224792	-3.20445	0.0119379	-3.65649	0.00126957	-1.03616	0.0733407	-1.47434	0.0379924	-1.94275	0.00782135	-1.8105	0.0161186	-1.37806	0.0387652	-1.56309	0.00789213	-5.83981	5.64972e-05	-4.57861	1.65939e-05	-4.43789	1.60129e-05	-5.3156	1.79308e-05	-4.58251	0.000559978	-5.21958	4.07861e-05	-0.438179
palmitoyl-oleoyl-glycerol (16:0/18:1) [2]*	-0.892671	0.259745	-0.172436	0.959514	0.0835756	0.932832	-0.0320302	0.956227	-0.693533	0.467139	-0.820249	0.16229	-2.38904	0.000389708	-1.14139	0.0507316	0.0191502	0.950182	-1.5284	0.0171343	-1.66249	0.063861	-0.884674	0.0915818	-1.62646	0.00165183	-1.57166	0.0203789	-2.52518	0.000572922	-1.41206	0.0219749	-0.637035	0.348962	-1.33454	0.0267947	-4.0155	1.13013e-05	-2.71305	1.44413e-05	-2.50603	2.78568e-05	-2.94047	0.000306126	-2.29952	0.00712872	-2.21921	0.000784613	0.054794
linolenoyl-linolenoyl-glycerol (18:3/18:3) [2]*	-0.172217	0.936802	0.884668	0.562021	1.36558	0.522421	-0.0308152	0.93847	0.744003	0.214105	0.167058	0.821591	-4.65458	6.91119e-05	-4.84876	1.16738e-05	-3.94769	0.000235481	-4.51318	7.49541e-05	-4.98943	0.00023303	-5.14621	7.26437e-05	-0.930618	0.139151	-0.936434	0.0782148	-1.6603	0.00358193	-2.04675	0.00785438	-0.995678	0.194059	-1.23863	0.0788649	-5.5852	1.82526e-07	-5.7852	2.83033e-08	-5.60799	2.88109e-07	-6.55993	9.77902e-07	-5.98511	6.026e-06	-6.38484	2.2746e-06	-0.00581566
oleoyl-oleoyl-glycerol (18:1/18:1) [2]*	-0.782542	0.301637	-0.559176	0.783473	-0.494342	0.749625	0.583878	0.521406	-0.927129	0.308439	-0.658997	0.369636	-3.22514	0.00018837	-1.58614	0.049671	0.191569	0.419258	-1.85872	0.0175765	-1.95409	0.0454038	0.0269136	0.967024	-2.45119	0.000433839	-1.86122	0.0324004	-3.17524	0.000238278	-1.86761	0.0150034	-1.05428	0.230842	-2.30347	0.0102867	-5.67633	4.0894e-06	-3.44736	1.6594e-05	-2.98368	3.66208e-05	-3.72634	0.00069059	-3.00837	0.00290316	-2.27656	0.00423001	0.589965
palmitoyl-linoleoyl-glycerol (16:0/18:2) [2]*	-0.79848	0.41334	0.0613282	0.973263	0.224502	0.835223	-0.199223	0.779587	-0.338602	0.69047	-0.77595	0.159707	-3.58782	9.86681e-05	-2.36735	0.0003783	-1.64954	0.00263092	-2.98856	0.000745107	-2.76728	0.00790479	-2.64999	0.000216938	-1.4488	0.00211464	-1.72915	0.00334718	-2.15673	0.00061018	-2.09195	0.00343584	-1.51249	0.0182212	-1.77689	0.00173373	-5.03661	3.43723e-06	-4.0965	2.66907e-07	-3.80627	6.91784e-07	-5.08051	1.03991e-06	-4.27977	0.000142832	-4.42688	1.67485e-06	-0.280352
linoleoyl-linolenoyl-glycerol (18:2/18:3) [2]*	-0.504539	0.67148	0.228285	0.927752	0.832639	0.541075	0.418634	0.521406	0.551448	0.501799	0.123727	0.886161	-4.76247	3.13273e-05	-4.39611	9.16716e-05	-3.49058	0.000880342	-3.8393	0.000682482	-4.07294	0.000775037	-4.19949	4.28912e-05	-1.93876	0.00466716	-1.83233	0.0176184	-2.57974	0.0010213	-2.55448	0.00463655	-1.71522	0.0246308	-1.85827	0.0036886	-6.70124	7.31117e-07	-6.22844	3.08387e-07	-6.07032	1.89833e-06	-6.39378	1.62485e-06	-5.78816	1.06284e-05	-6.05777	2.09991e-06	0.106435
diacylglycerol (14:0/18:1, 16:0/16:1) [2]*	-0.944012	0.352816	0.0937445	0.963302	-0.228532	0.863408	0.0776012	0.92935	-0.665456	0.501799	-1.05745	0.222184	-2.41967	0.00164885	-0.873308	0.0898786	-0.109138	0.67421	-1.39805	0.0765754	-1.63251	0.0832025	-0.938054	0.170608	-1.60195	0.00105612	-1.61496	0.00809241	-2.1697	0.00032336	-1.97098	0.00797405	-0.946239	0.180808	-1.82325	0.00832823	-4.02162	2.93755e-05	-2.48827	9.60503e-06	-2.27884	9.53994e-06	-3.36904	0.000257462	-2.57875	0.00372394	-2.76131	0.000362194	-0.013013
diacylglycerol (16:1/18:2 [2], 16:0/18:3 [1])*	-1.14777	0.24336	-0.0618599	0.977816	0.177734	0.861536	0.169196	0.844301	-0.327789	0.674008	-0.667795	0.425692	-3.75065	9.05592e-05	-2.51728	0.000718931	-1.59087	0.000798328	-2.43368	0.0045117	-2.78321	0.00864107	-2.4364	0.00146516	-2.37637	0.000338426	-2.15368	0.00228728	-2.73981	0.000103292	-2.88534	0.000740439	-1.57673	0.0370394	-1.92328	0.00247751	-6.12703	7.30479e-07	-4.67096	2.5841e-07	-4.33069	4.4088e-07	-5.31903	1.03365e-05	-4.35995	0.000106017	-4.35968	1.97623e-05	0.222695
linoleoyl-linoleoyl-glycerol (18:2/18:2) [2]*	-1.03044	0.366075	-0.0633423	0.977816	0.644581	0.696003	-0.151548	0.856511	-0.363731	0.666269	-0.623936	0.491352	-4.44485	8.44309e-05	-3.76275	8.39583e-05	-2.58112	0.000150935	-3.56597	0.000572092	-4.06314	0.00184716	-3.84963	0.000187832	-2.58777	0.000288144	-2.10143	0.00232726	-2.8491	9.96928e-05	-3.35839	0.000869906	-1.90495	0.0252667	-1.9447	0.00542435	-7.03263	6.50651e-07	-5.86418	6.0294e-08	-5.43022	8.26429e-08	-6.92436	1.57381e-06	-5.96809	3.02719e-05	-5.79434	8.40332e-06	0.486344
oleoyl-linoleoyl-glycerol (18:1/18:2) [2]	-1.0744	0.192024	-0.181144	0.953196	0.155194	0.869184	0.182456	0.809972	-0.408498	0.537576	-0.679675	0.357115	-3.64299	6.91119e-05	-2.42284	0.000699534	-1.34511	0.00156921	-2.38614	0.00180387	-2.65019	0.00875141	-2.17998	0.00270458	-2.04042	0.000229725	-1.7072	0.0045297	-2.28681	0.000145722	-2.13945	0.00300427	-0.912982	0.215078	-1.15625	0.0469351	-5.68341	6.92506e-07	-4.13004	1.50222e-07	-3.63192	1.39404e-07	-4.52559	2.12005e-05	-3.56317	0.000319325	-3.33623	0.000119774	0.333215
palmitoyl-linoleoyl-glycerol (16:0/18:2) [1]*	-0.904608	0.338917	0.187364	0.800231	0.55393	0.696003	-1.01868	0.173123	-0.76585	0.494154	-1.17233	0.485764	-4.0788	7.29949e-06	-2.40794	0.000342562	-2.45365	0.00346269	-4.19287	0.000234302	-3.36116	0.00146429	-4.1799	0.000723639	1.86117	0.149282	1.61339	0.206852	1.85735	0.205687	-0.511752	0.289974	0.332442	0.292477	0.942964	0.0316839	-2.21762	0.0816517	-0.794547	0.504595	-0.596298	0.619216	-4.70462	3.24672e-06	-3.02871	0.000978275	-3.23694	0.000754384	-0.247778
palmitoyl-oleoyl-glycerol (16:0/18:1) [1]*	-1.02569	0.236461	0.0669562	0.962627	0.232883	0.841296	-1.1922	0.0955152	-1.38895	0.178371	-1.37388	0.159707	-2.52992	0.000106616	-0.869111	0.0185073	-0.371306	0.438052	-2.69644	0.000628555	-2.32502	0.0124691	-1.97807	0.00212505	0.887372	0.0260032	0.899485	0.0243205	0.94016	0.0125564	0.379879	0.375058	1.48463	0.00175501	1.69124	0.00296929	-1.64255	0.000454199	0.0303744	0.90297	0.568855	0.144742	-2.31656	6.18616e-05	-0.840384	0.225103	-0.286834	0.265729	0.0121127
linoleoyl-linolenoyl-glycerol (18:2/18:3) [1]*	-0.590277	0.606539	0.571731	0.511139	1.10879	0.522421	0.00204814	0.995874	-0.0948884	0.865663	-0.845314	0.485764	-5.64762	1.53883e-05	-3.99004	1.16738e-05	-3.70978	0.00101771	-5.0553	8.57513e-05	-4.65666	3.21066e-05	-5.66388	4.28912e-05	0.872465	0.092198	0.795321	0.0450419	1.0917	0.00292549	-0.56095	0.223877	0.523914	0.135278	1.35735	0.0146165	-4.77516	3.47454e-07	-3.19472	3.87484e-07	-2.61808	0.00014557	-5.61625	8.7722e-07	-4.13274	5.58139e-06	-4.30653	4.23642e-06	-0.0771439
oleoyl-linoleoyl-glycerol (18:1/18:2) [1]	-1.12108	0.198045	-0.080277	0.959514	0.425616	0.696003	-0.909419	0.250968	-1.07751	0.126899	-1.09072	0.267954	-3.69747	2.13117e-05	-2.22721	0.000154908	-1.74967	0.0204637	-3.48581	0.000332317	-3.22445	0.000375665	-3.26601	0.000180525	0.0754885	0.83477	0.42553	0.127738	0.674395	0.024097	-0.439922	0.317614	0.950923	0.0357994	1.70568	0.00304878	-3.62198	7.93927e-07	-1.80168	0.000146325	-1.07528	0.020542	-3.92573	1.38798e-05	-2.27352	0.000664442	-1.56033	0.00114673	0.350042
palmitoleoyl-linoleoyl-glycerol (16:1/18:2) [1]*	-1.12994	0.384128	0.0712663	0.963302	0.360457	0.822334	-0.512693	0.508179	-1.0821	0.188068	-1.67384	0.159707	-4.30593	3.93377e-05	-2.81205	0.00030864	-2.19337	0.0149011	-3.68868	0.000559677	-3.96542	0.000405688	-4.22766	7.71844e-05	-0.586082	0.220702	-0.0579571	0.894666	0.158871	0.659243	-1.5684	0.0254898	0.16093	0.74465	0.666949	0.188291	-4.89201	1.0028e-06	-2.87001	2.44882e-05	-2.0345	0.00180603	-5.25708	3.73013e-07	-3.80449	7.38836e-05	-3.56071	3.84189e-06	0.528125
linoleoyl-linoleoyl-glycerol (18:2/18:2) [1]*	-1.26861	0.259745	0.105142	0.959514	0.647978	0.696003	-0.96288	0.173123	-0.876925	0.243211	-1.35834	0.222184	-4.66784	1.14766e-05	-3.5351	2.88751e-05	-3.14623	0.00278526	-4.36211	0.000234302	-4.51717	0.000126212	-5.15255	4.28912e-05	-0.298008	0.425355	0.117627	0.668615	0.523905	0.0694196	-1.70945	0.0132506	0.0799343	0.884521	1.02905	0.0629366	-4.96585	6.68515e-08	-3.41747	2.30491e-06	-2.62233	0.000189732	-6.07156	7.15039e-07	-4.43723	1.58564e-05	-4.1235	5.70458e-06	0.415635
oleoyl-oleoyl-glycerol (18:1/18:1) [1]*	-1.13999	0.606539	-0.989833	0.685246	0.23514	0.861536	0	NA	-1.55423	0.169835	-2.28392	0.16229	-3.21601	0.0101176	-1.74356	0.0518439	-0.778708	0.261649	-2.07602	0.00300458	-2.30796	0.0437323	-3.29777	0.00241365	0.555034	0.676471	1.12409	0.248457	1.46625	0.147967	-0.0846227	0.915972	0.634592	0.588832	2.20173	0.0186348	-2.66097	0.007144	-0.619466	0.524655	0.687547	0.438551	-2.16064	0.00811848	-1.67336	0.0464239	-1.09604	0.225088	0.569056
N-stearoyl-sphinganine (d18:0/18:0)*	-0.775445	0.563759	-0.12054	0.973263	0.295322	0.913352	-0.951233	0.277698	-0.896544	0.389469	-0.187921	0.871766	1.61944	0.0275213	3.4876	0.00012845	3.34978	0.00547129	1.44365	0.0331926	2.71159	0.0600599	2.86654	0.0427887	0.247861	0.66409	-0.76101	0.0452704	-0.944736	0.155055	0.264606	0.645393	-0.0893603	0.944435	0.142776	0.908082	1.8673	0.000987753	2.72659	0.000154267	2.40504	4.51079e-05	1.70826	0.00234021	2.62223	0.00188302	3.00931	0.000432279	-1.00887
N-palmitoyl-sphinganine (d18:0/16:0)	-0.319574	0.606539	0.452918	0.685246	0.439494	0.779318	-0.854793	0.384306	-1.17477	0.36806	-0.736112	0.641474	0.623812	0.329584	2.48033	0.00137516	2.34107	0.00263092	0.088592	0.410238	0.852646	0.35093	1.16547	0.252033	0.254876	0.50139	-0.0646976	0.387957	0.0450017	0.74983	-2.80867e-16	0.392956	0.452918	0.419479	0.549194	0.259135	0.878688	0.0771184	2.41563	0.000974752	2.38607	5.39877e-05	0.088592	0.361953	1.30556	0.0582785	1.71466	0.0348096	-0.319574
N-stearoyl-phytosphingosine (t18:0/18:0)*	-0.70143	0.41334	0.147801	0.914297	1.24988	0.604921	-0.801835	0.508179	-1.03648	0.394102	-0.62714	0.369636	1.48755	0.0422552	2.56602	0.000379247	0.679737	0.408585	1.38714	0.00293759	1.38173	0.116911	-1.19728	0.0185366	-2.01404	0.0014993	-2.25021	3.04977e-05	0.0557323	0.930103	-1.64186	0.0112325	-1.0288	0.135278	2.37922	0.00227128	-0.526495	0.272843	0.315814	0.398357	0.735469	0.00434795	-0.254721	0.629243	0.352938	0.663374	1.18194	0.0553206	-0.236163
(3'-5')-adenylyladenosine*	-0.694444	0.356436	-0.196156	0.869547	-0.373294	0.861536	-1.45304	0.0989737	-0.113008	0.851384	-0.661337	0.267954	-2.51157	0.000606649	-1.54493	0.0124277	-0.0679355	0.948746	-3.27017	0.000112038	-1.46178	0.00411816	-0.355978	0.236672	1.13813	0.00570578	0.327109	0.488795	-2.09721	0.0298454	0.651138	0.153666	0.338403	0.310592	-2.26305	0.000144902	-1.37344	0.0197965	-1.21782	0.012564	-2.16515	0.000300203	-2.61903	2.73236e-06	-1.12338	0.00842347	-2.61903	3.45034e-06	-0.811022
(3'-5')-uridylyluridine	-0.0323826	0.989048	0.235234	0.800231	-0.176128	0.696003	-0.504136	0.382784	-0.0877752	0.89311	2.80867e-16	0.641474	-1.83063	0.000212328	-0.180441	0.603396	-0.176128	0.436492	-2.30238	0.000798855	-0.50345	0.332501	2.80867e-16	0.419685	-1.17402	0.000368905	-2.87222	3.00553e-05	-3.47683	1.42928e-05	0.19595	0.653303	-1.23464	0.00965765	-2.25061	7.16564e-06	-3.00464	4.5825e-06	-3.05267	2.41894e-06	-3.65296	4.75956e-08	-2.10643	2.20253e-05	-1.73809	0.0022678	-2.25061	7.15087e-06	-1.69821
(3'-5')-guanylyluridine	-0.386463	0.583023	-0.0145767	0.994038	-0.125373	0.935634	-0.347249	0.536642	-0.663856	0.213211	-0.53378	0.585781	-2.56988	3.0745e-05	-0.586606	0.369264	-0.0709167	0.938807	-2.53067	0.00110165	-1.23589	0.0166037	-0.479324	0.369471	0.0676183	0.773446	-0.994788	0.135169	-2.62663	0.00405595	1.45281	0.00786141	0.762291	0.0587297	-0.980349	0.0633482	-2.50227	3.72182e-05	-1.58139	0.000177393	-2.69755	0.000124577	-1.07786	0.0215999	-0.473594	0.23754	-1.45967	0.000877604	-1.06241
(3'-5')-cytidylyluridine*	-0.633375	0.606539	-0.470302	0.622296	-0.358272	0.696003	-0.217356	0.521406	-0.648348	0.141936	-0.135902	0.641474	-2.25295	6.23472e-05	0.16123	0.649147	-0.222371	0.66341	-1.83693	0.0248095	-0.0168165	0.96301	0	NA	-1.34774	0.00171751	-2.96382	6.2729e-05	-3.47176	0.000218404	0.025651	0.971202	-1.42736	0.00844713	-1.82328	0.00021082	-3.60068	7.3548e-07	-2.80259	7.02213e-06	-3.69414	9.71678e-07	-1.81128	0.000174242	-1.44418	0.0022678	-1.82328	0.0001779	-1.61608
(3'-5')-adenylyluridine	-0.686862	0.448029	-0.410219	0.555408	-0.317374	0.863408	-1.23438	0.0989737	-0.174906	0.73394	-0.543154	0.635947	-2.35401	8.69696e-05	-0.818629	0.0488289	0.182512	0.85155	-2.90153	0.000835945	-0.583316	0.125067	-0.0432679	0.92653	-1.27564	0.00342107	-2.62499	3.57497e-05	-4.87436	0.000314952	-0.133078	0.751767	-1.20579	0.00264986	-3.36231	4.92056e-05	-3.62965	1.53086e-07	-3.44362	3.10537e-06	-4.69185	3.72003e-06	-3.03461	3.31349e-05	-1.78911	0.000325636	-3.40558	2.4886e-06	-1.34936
(3'-5')-uridylyladenosine	-0.57579	0.3745	-1.39899	0.045646	-0.229224	0.696003	-2.80867e-16	0.521406	-2.80867e-16	0.501799	-2.80867e-16	0.641474	-2.04686	3.56401e-05	-2.35182	9.91667e-06	-0.229224	0.436492	-1.47107	0.00071152	-0.952831	0.0124691	-2.80867e-16	0.419685	-1.21479	0.00147911	-0.909829	0.00446926	-3.03243	4.64704e-05	1.04041	0.0199286	0.522175	0.23333	-0.430656	0.14162	-3.26165	1.53061e-08	-3.26165	2.33778e-08	-3.26165	4.62386e-08	-0.430656	0.133577	-0.430656	0.136006	-0.430656	0.143086	0.304966
(3'-5')-cytidylyladenosine	-0.874156	0.452702	-0.27659	0.704154	-0.306243	0.696003	0.0461732	0.521406	-0.0661622	0.501799	1.40433e-16	0.641474	-1.78409	0.000253302	-0.956582	0.00772899	-0.306243	0.436492	-0.863759	0.18078	-0.746154	0.00875141	1.40433e-16	0.419685	0.0702314	0.850653	-0.691113	0.0688509	-1.40761	0.00924058	-0.323466	0.589784	-0.487244	0.155549	-1.2334	0.000579348	-1.71386	3.40556e-05	-1.64769	7.18978e-05	-1.71386	4.8768e-05	-1.18723	0.00069059	-1.2334	0.000479582	-1.2334	0.000504751	-0.761345
(3'-5')-adenylylguanosine*	-0.0456201	0.96204	-1.40433e-16	0.685246	-1.66533e-16	0.696003	-1.40433e-16	0.521406	-1.40433e-16	0.501799	-1.40433e-16	0.641474	-0.17149	0.383678	-1.40433e-16	0.390824	-1.66533e-16	0.436492	-0.12587	0.410238	-1.40433e-16	0.408512	-1.40433e-16	0.419685	-1.73302	8.09412e-05	-1.90451	7.29449e-07	-1.90451	6.24583e-06	-1.50794	0.000195533	-1.63381	3.02803e-05	-1.63381	9.57294e-06	-1.90451	7.64825e-08	-1.90451	9.9293e-08	-1.90451	1.92565e-07	-1.63381	7.91964e-06	-1.63381	7.06347e-06	-1.63381	9.41836e-06	-0.17149
valylglutamine	-1.24421	0.269433	-0.723953	0.594904	6.66134e-16	0.696003	-2.80867e-16	0.521406	-2.80867e-16	0.501799	-2.80867e-16	0.641474	-2.94165	5.32477e-07	-2.40414	0.000323925	6.66134e-16	0.436492	-1.69744	0.025735	-1.68019	0.0103949	-2.80867e-16	0.419685	-0.856394	0.0132573	-1.39391	0.0131445	-3.79804	1.84538e-05	-1.73371	0.0231495	-1.75096	0.0105779	-3.43115	5.8744e-07	-3.79804	3.18507e-07	-3.79804	3.87484e-07	-3.79804	6.64204e-07	-3.43115	4.71378e-07	-3.43115	3.23506e-07	-3.43115	7.47421e-07	-0.537511
glycylvaline	-0.509378	0.515049	-0.110846	0.88464	-0.426056	0.824259	-0.378455	0.521406	0.493836	0.427897	0.00970005	0.641474	-2.94249	0.000102921	-3.52371	2.85076e-06	-0.772039	0.221605	-2.81157	0.000347869	-2.91903	0.000282309	-0.336284	0.4317	-1.03453	0.00101308	-0.698394	0.00446926	-3.72791	0.000273827	-2.0121	0.00131346	-1.27743	0.00268954	-4.62216	6.44175e-06	-3.97702	7.05674e-06	-4.22211	3.02064e-07	-4.49995	2.00617e-08	-4.82367	3.36586e-08	-4.19646	2.78479e-06	-4.95844	1.11893e-08	0.336134
glycylleucine	-0.959575	0.404312	-0.333162	0.838006	-3.33067e-16	0.696003	0	NA	0	NA	0	NA	-2.32584	1.58328e-05	-1.88167	4.22892e-05	-3.33067e-16	0.436492	-1.36626	0.0414956	-1.54851	0.0380205	0	NA	-1.49057	0.00126836	-1.93474	0.000299368	-3.8164	1.13431e-05	-2.9621	0.00116608	-2.77986	0.00292165	-4.32837	2.14153e-07	-3.8164	1.57497e-07	-3.8164	2.02378e-07	-3.8164	3.48587e-07	-4.32837	1.6121e-07	-4.32837	9.97966e-08	-4.32837	2.47011e-07	-0.444168
phenylalanylglycine	-0.870952	0.384128	-0.438758	0.740822	-6.66134e-16	0.696003	0	NA	0	NA	0	NA	-2.10283	3.56312e-05	-1.56485	0.000329357	-6.66134e-16	0.436492	-1.23188	0.0324775	-1.12609	0.0720782	0	NA	-0.677381	0.0463568	-1.21536	0.00412641	-2.78021	2.52187e-05	-1.48872	0.0130015	-1.5945	0.0192371	-2.72059	1.71342e-07	-2.78021	4.61967e-07	-2.78021	5.43451e-07	-2.78021	9.11306e-07	-2.72059	1.18234e-07	-2.72059	7.18382e-08	-2.72059	2.0306e-07	-0.53798
isoleucylglycine	-0.557586	0.606539	0.0381872	0.985742	0	NA	0	NA	0	NA	0	NA	-1.87317	0.000179847	-1.05074	0.0518439	0	NA	-1.31558	0.0344283	-1.08893	0.0517018	0	NA	-2.38486	0.000432072	-3.20728	0.000505102	-4.25803	3.05213e-05	-2.93154	0.000976121	-3.15819	0.000590229	-4.24712	5.8744e-07	-4.25803	6.61562e-07	-4.25803	7.53055e-07	-4.25803	1.22499e-06	-4.24712	4.69969e-07	-4.24712	3.18908e-07	-4.24712	7.45491e-07	-0.822423
tyrosylglycine	-0.400622	0.461991	-0.312825	0.685246	-0.910826	0.696003	0	NA	0.0847376	0.501799	0.261991	0.641474	-2.76139	1.91372e-06	-2.90172	4.88296e-07	-1.07437	0.129353	-2.36076	7.06113e-05	-2.50415	0.000187841	0.0984481	0.809619	-1.06746	0.00141692	-0.927132	0.00196208	-2.75448	0.00152696	-1.81173	0.000250937	-1.58361	0.00193799	-4.00895	3.98795e-07	-3.82885	1.63395e-08	-3.82885	2.48544e-08	-3.82885	4.92e-08	-4.1725	1.08584e-08	-4.08776	2.26309e-08	-3.91051	3.80354e-06	0.140331
valylglycine	-0.193465	0.707351	5.61733e-16	0.685246	0	NA	5.61733e-16	0.521406	5.61733e-16	0.501799	5.61733e-16	0.641474	-0.352123	0.197089	5.61733e-16	0.390824	0	NA	-0.158658	0.251013	5.61733e-16	0.408512	5.61733e-16	0.419685	-2.28142	0.00170613	-2.63354	0.000432035	-2.63354	0.00160147	-2.88708	0.000175287	-3.04574	0.000119105	-3.04574	5.20562e-05	-2.63354	0.000202901	-2.63354	0.000223311	-2.63354	0.000257682	-3.04574	3.80607e-05	-3.04574	3.87284e-05	-3.04574	4.61904e-05	-0.352123
histidylalanine	-0.0606568	0.927803	0.261152	0.756305	-3.33067e-16	0.696003	2.80867e-16	0.521406	2.80867e-16	0.501799	2.80867e-16	0.641474	-0.172286	0.383678	-0.209944	0.195975	-3.33067e-16	0.436492	-0.111629	0.336243	-0.471096	0.214907	2.80867e-16	0.419685	-0.921458	0.0053381	-0.883799	0.00335956	-1.09374	0.00087206	-2.05169	6.99744e-06	-1.69222	0.00190669	-2.16332	2.28317e-07	-1.09374	8.05346e-05	-1.09374	8.91724e-05	-1.09374	0.000109546	-2.16332	1.74997e-07	-2.16332	1.11917e-07	-2.16332	2.6785e-07	0.0376584
glycylisoleucine	0.19163	0.790404	-0.0733878	0.944799	0	NA	2.80867e-16	0.521406	2.80867e-16	0.501799	2.80867e-16	0.641474	-0.161862	0.383678	-0.401289	0.0749676	0	NA	-0.353493	0.2998	-0.327901	0.0853208	2.80867e-16	0.419685	-2.51729	7.03371e-05	-2.27787	0.000153328	-2.67915	0.00010144	-2.65919	0.000195533	-2.68478	4.44136e-05	-3.01268	2.26048e-06	-2.67915	3.7037e-06	-2.67915	4.18745e-06	-2.67915	6.56895e-06	-3.01268	1.84223e-06	-3.01268	1.49681e-06	-3.01268	2.37296e-06	0.239427
phenylalanylalanine	-0.0312544	0.606539	-0.0613239	0.959514	-9.99201e-16	0.696003	0.382116	0.521406	-2.80867e-16	0.501799	0.242599	0.641474	-0.0312544	0.383678	-0.203068	0.390824	-9.99201e-16	0.436492	0.382116	0.410238	-0.141744	0.408512	0.242599	0.419685	-0.0171668	0.80001	0.154647	0.518096	-0.0484212	0.45287	-0.0519496	0.392956	0.0897943	0.639314	-0.0519496	0.39237	-0.0484212	0.362714	-0.0484212	0.373574	-0.0484212	0.371987	0.330167	0.431127	-0.0519496	0.375707	0.190649	0.513475	0.171813
tryptophylglycine	0.117225	0.540018	-0.291958	0.752447	-0.108995	0.696003	-2.80867e-16	0.521406	-2.80867e-16	0.501799	-2.80867e-16	0.641474	-2.80867e-16	0.383678	-0.525257	0.196948	-0.108995	0.436492	-0.117225	0.302293	-0.233299	0.229229	-2.80867e-16	0.419685	-2.60563	1.28518e-06	-2.08037	0.000852392	-2.49663	2.52209e-05	-2.99916	1.27142e-05	-2.88309	3.14345e-05	-3.11639	1.57949e-06	-2.60563	1.02935e-07	-2.60563	1.35398e-07	-2.60563	2.57511e-07	-3.11639	1.24456e-06	-3.11639	1.00127e-06	-3.11639	1.75545e-06	0.525257
trehalose 6-phosphate	0	NA	0	NA	6.66134e-16	0.696003	1.52734	0.521406	0.602608	0.501799	0.989777	0.641474	0	NA	0	NA	6.66134e-16	0.436492	1.52734	0.348429	0.602608	0.408512	0.989777	0.419685	0	NA	0	NA	-6.66134e-16	0.339103	0	NA	0	NA	0	NA	0	NA	0	NA	0	NA	1.52734	0.286692	0.602608	0.375707	0.989777	0.387243	0
trehalose	-0.889671	0.807515	-1.85419	0.0920114	-0.487855	0.861536	1.92489	0.380203	0.648532	0.382421	-0.017731	0.990811	-1.30969	0.329584	-3.724	3.87661e-05	1.63754	0.234196	1.50487	0.404932	-1.22127	0.0749867	2.10766	0.0207914	-0.431085	0.746412	3.88198	2.46447e-05	1.04004	0.308057	0.256441	0.866487	3.60498	0.00734183	2.12938	0.0494641	-1.74077	0.00162164	0.15798	0.724888	2.67758	0.000589209	1.76131	0.192701	2.38371	0.0241341	4.23705	0.00228312	4.31306
geranyllinalool	-1.75204	0.0771915	-0.482315	0.815831	-0.633087	0.696003	-2.80867e-16	0.521406	0.0534275	0.501799	-0.603922	0.511346	-3.89505	3.02348e-06	-3.17148	0.00028742	0.532097	0.461439	-2.143	0.00172351	-2.63574	0.00760124	0.561262	0.296778	0.119618	0.708194	-0.603945	0.258024	-2.75849	0.00192868	-1.13963	0.0573876	-0.59347	0.46727	-2.89879	0.000152942	-3.77543	2.12724e-08	-3.77543	3.20467e-08	-2.22639	1.80112e-05	-3.28264	5.00807e-06	-3.22921	5.82683e-06	-2.33753	0.000586101	-0.723563
S-carboxymethyl-L-cysteine	-0.36341	0.606539	-0.0849573	0.959514	0.19156	0.841296	-0.157503	0.92935	1.25783	0.501799	0.392824	0.880264	0.317522	0.742915	-1.41432	0.0220491	-1.71184	0.084463	0.523429	0.600647	-0.07153	0.961756	-1.51057	0.227056	-0.660855	0.121567	-0.568272	0.0483048	-0.239533	0.521435	0.403549	0.226361	0.774584	0.119809	1.37984	0.00148246	-0.343333	0.69975	-1.98259	0.00406731	-1.95137	0.00639014	0.926978	0.329645	0.703054	0.561833	-0.130732	0.90723	0.0925824
N-carbamoylglutamate	0.751302	0.366075	5.61733e-16	0.685246	0.432664	0.727137	-0.582648	0.521406	0.179002	0.812363	-0.32796	0.844936	1.67326	0.00409821	0.953886	0.0128691	0.881576	0.436492	0.339307	0.500235	1.13289	0.0357822	0.120952	0.824482	-2.03323	3.94046e-07	-2.03323	3.16644e-07	-1.3489	0.0137167	-1.69689	0.00532628	-2.4482	1.87348e-06	-1.3312	0.000458904	-0.359976	0.391884	-1.07935	0.00595546	-0.467328	0.435723	-1.35759	0.000558757	-1.31531	0.0151476	-1.21025	0.0232456	5.61733e-16
stearoyl ethanolamide	-0.520825	0.259745	-0.459926	0.420665	-0.150736	0.832782	-0.131032	0.700927	-0.412996	0.393087	-0.490318	0.348972	-1.31651	1.53883e-05	-0.789996	0.00189897	-0.108811	0.617159	-0.926719	0.0241965	-0.743066	0.0900908	-0.448393	0.164148	-0.0719443	0.606299	0.13005	0.455011	0.209266	0.147967	-0.3417	0.251314	-0.0788059	0.828507	0.309599	0.261202	-1.38846	9.0328e-06	-0.659946	0.00180569	0.100455	0.575571	-1.26842	0.00107898	-0.821872	0.0262431	-0.138794	0.542405	0.201995
oleoyl ethanolamide	-2.09457	0.0520252	-1.49611	0.202028	-0.503129	0.696003	0	NA	-0.405135	0.382421	-1.24793	0.286903	-2.73395	2.56414e-05	-2.20617	0.000434095	-0.759648	0.233546	-0.639379	0.217842	-1.11519	0.091296	-1.50445	0.0185366	0.982433	0.0301837	0.859786	0.0361518	1.51208	0.00292549	-0.414945	0.522559	0.0608665	0.944172	1.70614	0.0153913	-1.75152	0.000111182	-1.34638	0.00604385	0.752433	0.128441	-1.05432	0.0418694	-1.05432	0.0425841	0.201697	0.731988	-0.122647
palmitoyl ethanolamide	-0.844585	0.124237	-0.580334	0.129119	-0.379625	0.696003	0.229753	0.521406	-0.382303	0.204365	-0.547447	0.357115	-2.53797	1.65015e-05	-1.11861	0.000536374	-1.0327	0.0484543	-1.46363	0.00116503	-0.920577	0.0028677	-1.20052	0.00351523	0.39608	0.0692889	0.0706372	0.664474	0.981285	0.0114169	-0.213233	0.521684	-0.274424	0.373308	0.836932	0.0188865	-2.14189	9.58649e-06	-1.04797	0.000669805	-0.0514133	0.813458	-1.67686	0.000134791	-1.195	0.000846578	-0.363587	0.225088	-0.325443
linoleoyl ethanolamide	-0.130277	0.961929	-1.46075	0.311375	0.919025	0.771939	2.80867e-16	0.521406	2.80867e-16	0.501799	-0.521035	0.409259	-0.909988	0.0428955	-2.76879	0.000103944	-2.50691	0.0290892	-0.779711	0.230391	-1.30804	0.0867486	-3.94697	0.00210916	-1.19914	0.12523	0.659659	0.374282	0.918814	0.342584	-0.514168	0.504443	0.0141567	0.984866	2.65309	0.0191205	-2.10913	0.00634593	-2.10913	0.00661974	-1.58809	0.0376309	-1.29388	0.0264046	-1.29388	0.026738	-1.29388	0.027842	1.8588
palmitoleoyl ethanolamide*	-1.36999	0.119837	-1.3052	0.38053	-0.809358	0.696003	-2.80867e-16	0.521406	-0.147045	0.501799	-1.2675	0.267954	-2.04397	3.56401e-05	-1.79763	0.0177571	-2.24276	0.0143412	-0.673978	0.152826	-0.639479	0.20879	-2.7009	0.000838239	0.969211	0.0327118	0.869922	0.214372	3.02447	0.00160611	-0.131588	0.819042	-0.166088	0.820312	2.48431	0.000253761	-1.07476	0.00682966	-0.927711	0.0251046	0.781713	0.0642858	-0.805567	0.0540188	-0.805567	0.054665	-0.216593	0.726796	-0.0992889
(S)-3-hydroxybutyrylcarnitine	1.18006	0.462668	0.44081	0.735367	0.765371	0.696003	0.691075	0.508179	1.03067	0.399304	0.600091	0.82119	-1.27093	0.0653639	-2.84194	0.000607244	-0.156923	0.911986	-1.75992	0.0646976	-2.25208	0.0284735	-0.322204	0.767953	-4.51899	0.000127893	-2.54898	1.74774e-05	-4.25427	0.000520308	-3.81951	0.000393441	-2.58875	0.00177153	-3.96948	5.41544e-06	-5.78992	3.74038e-10	-5.39092	2.71107e-06	-4.41119	0.000344752	-5.57942	4.36446e-06	-4.84083	4.51167e-05	-4.29168	0.00101018	1.97
acetylcarnitine (C2)	-0.585554	0.606539	1.12341	0.622296	-0.270181	0.894704	0.719842	0.587899	-0.167668	0.821745	-0.547381	0.767661	-0.785342	0.142406	-0.696983	0.101748	-1.76198	0.148682	0.520053	0.623575	-1.98806	0.10113	-2.03918	0.076673	-3.96111	0.00013539	-4.24017	0.00010041	-2.25158	0.0424419	-4.8489	8.78803e-05	-3.41899	0.00836862	-2.82399	0.000782493	-4.74645	2.5033e-05	-4.93716	6.35612e-06	-4.01356	6.60921e-05	-4.32884	0.0011887	-5.40706	9.63495e-06	-4.86317	0.000324318	-0.279062
linoleoylcholine*	-0.979088	0.488763	0.246687	0.959514	4.13906	0.131716	0	NA	-0.180994	0.62042	-0.39571	0.817014	-2.60021	0.000845953	-1.0172	0.316102	-0.437216	0.775847	-1.62112	0.0219282	-1.44488	0.0712874	-4.97198	0.000114575	2.17792	0.0035794	0.908509	0.34898	1.24745	0.268201	1.45324	0.0339378	1.4096	0.0755144	5.64091	1.14584e-06	-0.422292	0.0843573	-0.108693	0.724888	0.81023	0.202582	-0.167885	0.361953	-0.0352792	0.887853	0.668928	0.221692	-1.26941
palmitoylcholine	-0.421041	0.843816	-0.0192813	0.994038	2.43442	0.040198	-0.19219	0.521406	-0.472485	0.501799	-0.657028	0.648175	-1.69574	0.07489	0.159188	0.830197	-0.676662	0.448439	-1.46689	0.0223408	-0.294015	0.715497	-3.76811	0.00082018	1.74842	0.0602637	1.11149	0.143496	2.79524	0.000351279	1.46689	0.0167659	1.23172	0.0678982	5.36917	3.73727e-07	0.0526776	0.81912	1.27068	0.00075348	2.11857	0.00380778	1.40433e-16	0.361953	0.937707	0.0609976	1.60106	0.0181538	-0.636925
N-oleoylglycine	2.80867e-16	0.606539	2.80867e-16	0.685246	0.9852	0.696003	2.80867e-16	0.521406	2.80867e-16	0.501799	-0.62952	0.583055	2.80867e-16	0.383678	2.80867e-16	0.390824	-0.276039	0.778308	2.80867e-16	0.410238	2.80867e-16	0.408512	-1.89076	0.0305511	-0.684235	0.19391	-0.684235	0.199427	0.221324	0.795646	-2.80867e-16	0.392956	-2.80867e-16	0.419479	1.89076	0.0181526	-0.684235	0.178424	-0.684235	0.184864	-0.0547145	0.937036	-2.80867e-16	0.361953	-2.80867e-16	0.375707	-2.80867e-16	0.387243	2.80867e-16
N-palmitoylglycine	-0.31844	0.758087	-0.600009	0.473961	1.14583	0.696003	2.80867e-16	0.521406	2.80867e-16	0.501799	-1.05234	0.357115	-0.786532	0.0760034	-2.40788	6.24121e-06	-0.392792	0.719261	-0.468093	0.226939	-1.80787	0.001926	-2.59096	0.00989633	-1.62154	0.0674759	-0.000194025	0.999764	-0.456308	0.688729	-1.41423	0.0123093	-0.0744574	0.893831	1.21527	0.0992824	-2.40807	0.00590931	-2.40807	0.00618066	-0.8491	0.274479	-1.88233	0.000195379	-1.88233	0.0001932	-1.37569	0.0150347	1.62134
butyrylcarnitine (C4)	0.64492	0.452702	0	NA	-0.391046	0.696003	0	NA	0	NA	0	NA	0	NA	0	NA	-0.391046	0.436492	-0.64492	0.22592	0	NA	0	NA	-3.72111	1.28518e-06	-3.72111	8.4e-07	-3.33006	0.000345339	-2.44635	0.00121108	-3.09127	1.94877e-06	-3.09127	4.59767e-07	-3.72111	1.03581e-07	-3.72111	1.35581e-07	-3.72111	2.57511e-07	-3.09127	3.57476e-07	-3.09127	2.46416e-07	-3.09127	5.91341e-07	0
propionylcarnitine (C3)	0.442467	0.679035	0.405273	0.959514	0.520655	0.863408	0.213434	0.521406	5.61733e-16	0.501799	-0.217416	0.641474	-0.39933	0.285799	-3.8623	0.000649812	-3.98199	0.0308277	-0.628363	0.288723	-4.26757	0.021898	-4.72006	0.000738638	-1.60688	0.064459	1.85609	0.0863202	2.19319	0.134053	-2.51128	0.00469394	0.914492	0.578034	1.36698	0.150967	-2.00621	0.0144942	-2.00621	0.0153802	-1.7888	0.0340463	-3.13965	0.000113578	-3.35308	4.43547e-05	-3.35308	5.23313e-05	3.46297
malonate	-0.381296	0.452702	-0.516989	0.23086	0.322016	0.835223	0.373728	0.521406	0.0749309	0.830457	-0.277597	0.784606	-2.20511	5.61248e-05	-1.51777	0.000311689	0.0359823	0.965863	-1.45008	0.00299788	-0.925851	0.00578177	-0.56363	0.125072	-0.098113	0.663112	0.491124	0.0231127	-0.666076	0.259926	-0.797704	0.00363669	-0.34416	0.0943425	-0.662355	0.00567266	-2.30322	1.03199e-06	-1.02665	0.000261968	-0.630094	0.126145	-2.24779	5.44542e-05	-1.27001	0.000216727	-1.22599	0.00169033	0.589237
(16 or 17)-methylstearate (a19:0 or i19:0)	0.289967	0.628842	0.119026	0.959514	0.140899	0.863408	-0.0890872	0.762745	-0.382517	0.135703	-0.438672	0.641474	-0.366585	0.221676	-0.205453	0.565273	-0.0490726	0.911986	-0.745639	0.0434864	-0.706996	0.108234	-0.628644	0.209738	-0.447868	0.281387	-0.257912	0.573331	-0.289016	0.504731	0.0912127	0.847704	0.110228	0.866076	0.100996	0.848401	-0.814452	0.0301516	-0.463365	0.177717	-0.338088	0.371987	-0.654426	0.128285	-0.596769	0.147937	-0.527647	0.312347	0.189956
2-hydroxyadipate	0.213843	0.968572	1.40528	0.583332	0.713215	0.772302	1.11058	0.521406	-0.731936	0.555732	1.27377	0.641474	-1.89303	0.15433	0.0195975	0.986008	-0.162684	0.915315	-0.996295	0.410238	-2.11762	0.0772876	0.39787	0.612726	-2.58757	0.0457541	-3.42671	0.00406581	-3.48387	0.00686195	-3.12805	0.00457733	-2.77575	0.0116463	-3.52498	5.99681e-07	-4.48061	4.98704e-05	-3.40711	0.00204862	-3.64655	0.00151852	-4.12435	0.000640878	-4.89337	3.31685e-05	-3.12711	0.00166122	-0.839134
maleate	-0.78506	0.0355813	0.0604141	0.963302	0.0323921	0.988363	0.138481	0.669212	-0.190169	0.617757	0.0297692	0.986174	-0.915371	0.00323836	0.230591	0.452937	0.448985	0.469499	0.00817031	0.962173	-0.0199924	0.961756	0.446362	0.454424	-1.08746	0.0131928	-1.55507	0.00456079	-1.57659	0.0244297	-2.16718	6.99744e-06	-1.78932	0.000590229	-1.83886	0.00537594	-2.00283	0.000301228	-1.32448	0.00438746	-1.12761	0.0125433	-2.15901	9.96399e-06	-1.80931	0.000121498	-1.3925	0.00111732	-0.467608
dodecanedioate (C12)	0.595934	0.790404	0.460534	0.886256	0.347422	0.906028	0.0878238	0.950024	-0.270534	0.865601	0.267886	0.898762	-0.168264	0.865609	-0.103996	0.931239	0.306511	0.82317	-0.676374	0.557773	-0.835063	0.482635	0.226974	0.867485	1.63664	0.0277981	1.69039	0.0912911	1.28051	0.168342	0.938438	0.45951	0.856786	0.471321	0.333789	0.812358	1.46838	0.123879	1.5864	0.0369025	1.58702	0.0395697	0.262063	0.784971	0.0217229	0.987225	0.560763	0.629586	0.0537496
3-hydroxyadipate	-0.0185959	0.99316	-0.274479	0.685246	0	NA	0.275233	0.521406	2.80867e-16	0.501799	0.204719	0.641474	-0.337395	0.383678	-0.274479	0.390824	0	NA	-0.0435654	0.928842	2.80867e-16	0.408512	0.204719	0.419685	0.337395	0.389019	0.274479	0.387957	0	NA	0.318799	0.392956	-2.80867e-16	0.419479	-2.80867e-16	0.39237	-2.80867e-16	0.362714	-2.80867e-16	0.373574	-2.80867e-16	0.371987	0.275233	0.361953	-2.80867e-16	0.375707	0.204719	0.387243	-0.0629161
sebacate (C10-DC)	0.347373	0.790404	0.225698	0.915854	0.214821	0.890957	-0.330817	0.727043	0.117609	0.892266	0.443789	0.673111	0.175174	0.76756	-0.306811	0.6265	-0.128741	0.856776	-0.503016	0.482097	-0.4149	0.514685	0.100227	0.890583	0.672174	0.0733407	0.656111	0.259717	0.416157	0.393087	0.26343	0.730939	0.125692	0.878434	-0.125138	0.872665	0.847348	0.14842	0.3493	0.379959	0.287416	0.464949	-0.239586	0.68832	-0.289208	0.655863	-0.0249113	0.973918	-0.0160627
2-hydroxysebacate	0.744827	0.51687	-0.477706	0.685246	-0.0466811	0.935603	-0.309169	0.794996	-0.535652	0.501799	0.167927	0.845615	1.73556	0.0282068	0.789232	0.261479	0.196563	0.678259	0.681562	0.410238	0.731286	0.135994	0.411171	0.277191	0.31356	0.227462	0.608823	0.224407	0.193384	0.339103	0.958241	0.114312	0.0309718	0.890328	0.0465572	0.845254	2.04912	0.00678807	1.39806	0.0088294	0.389947	0.172741	1.6398	0.0133401	0.762258	0.0900583	0.457729	0.143312	0.295264
azelate (C9-DC)	0.339191	0.750167	-0.792577	0.488438	0.0243599	0.988363	-0.417796	0.521406	-0.296546	0.610094	-0.126814	0.784606	-0.134868	0.777855	-2.0452	0.0100819	-0.807429	0.129615	-0.891855	0.0900299	-1.54917	0.0028677	-0.958603	0.0218468	0.584252	0.129876	1.93267	0.00735674	0.499928	0.211306	0.720059	0.277374	0.936711	0.0857338	0.320904	0.560591	0.449384	0.233502	-0.112524	0.713593	-0.307501	0.122606	-0.171796	0.709234	-0.612454	0.288838	-0.637699	0.224082	1.34842
glutarate (C5-DC)	0.59922	0.24336	-0.0262195	0.97812	0.0454422	0.921994	0.784723	0.382784	-0.189034	0.602325	-0.0756025	0.901179	-2.30339	8.98569e-05	-1.80153	0.000977687	-1.33892	0.00439858	-2.11789	0.00136133	-1.96434	8.15971e-05	-1.45997	0.00167568	-1.59742	0.000288144	-0.865305	0.0150891	-0.284836	0.260475	-1.95018	1.34514e-05	-1.8435	3.02803e-05	-1.19137	1.62063e-05	-3.90082	1.11982e-07	-2.66683	3.34758e-06	-1.62376	4.40391e-06	-4.06807	8.73083e-06	-3.80784	8.26301e-08	-2.65133	2.058e-05	0.73212
dodecadienoate (12:2)*	0.0968126	0.721297	0.259277	0.886256	0.494358	0.696003	0	NA	0	NA	-0.0604379	0.952713	-0.025085	0.383678	-2.22637	0.00012845	-2.58779	0.00551573	-0.121898	0.410238	-2.48565	0.00346594	-3.14259	4.36929e-05	0.025085	0.389019	2.22637	0.000110606	2.92933	0.000311195	-0.57767	0.487202	1.78608	0.108449	2.72412	0.00807333	0	NA	0	NA	0.341537	0.187889	-0.699568	0.361953	-0.699568	0.375707	-0.418469	0.630814	2.20129
2-hydroxyglutarate	-0.369652	0.851448	-0.35353	0.917294	0.520651	0.835223	0.588189	0.521406	-0.315528	0.564203	0.509021	0.585781	0.98697	0.203777	1.43749	0.117246	0.325641	0.720644	1.94481	0.0435962	1.47549	0.111284	0.314011	0.639401	2.53896	0.00383689	3.7021	0.00301716	4.52296	0.000813596	1.59712	0.0712275	2.77638	0.00710202	4.47143	0.000162927	3.52593	0.000186731	5.13958	9.14532e-07	4.8486	1.22379e-05	3.54194	3.03475e-05	4.25187	2.8468e-05	4.78544	1.56067e-06	1.16314
2S,3R-dihydroxybutyrate	0.478245	0.646659	-0.127377	0.963302	0.215668	0.911535	0.10821	0.740285	0.658082	0.321022	0.750007	0.641474	-2.40514	0.0020384	-1.18668	0.149542	-1.40844	0.323327	-2.77518	0.000206396	-0.401216	0.592166	-0.874105	0.102206	-2.61845	0.00123932	-3.20507	0.00109129	-2.91247	0.0102837	-1.17018	0.00457733	-2.36242	0.010208	-1.72677	9.97175e-05	-5.02359	2.14565e-09	-4.39175	4.03898e-06	-4.32091	5.07671e-05	-3.94535	4.84355e-07	-2.76364	7.84892e-07	-2.60087	0.000174288	-0.58662
2R,3R-dihydroxybutyrate	0.441958	0.437265	0.27253	0.716546	0.877518	0.696003	0.816072	0.242088	1.5717	0.000142155	0.476886	0.773537	-2.90572	1.48866e-05	-3.80386	6.24121e-06	-2.70062	0.0471788	-2.53161	0.000441996	-2.50469	3.05299e-05	-3.10126	0.00045894	-2.58341	5.87906e-05	-1.57937	0.000914516	-1.66171	0.0128146	-2.21238	5.81606e-06	-1.37778	0.000590229	-0.855122	0.000735648	-5.48913	1.81851e-09	-5.38323	1.09373e-08	-4.36233	9.481e-05	-4.74399	1.91219e-06	-3.88247	2.88162e-09	-3.95638	2.87719e-05	1.00403
8-hydroxyoctanoate	-0.371217	0.840651	0.0963647	0.963302	-0.33338	0.863408	-0.310481	0.828142	-0.373685	0.785062	-0.511448	0.697652	0.833324	0.256367	0.319012	0.690506	0.192542	0.85155	0.89406	0.417475	-0.151038	0.878137	0.0144745	0.9844	1.41208	0.00723205	1.10812	0.0989508	0.810064	0.276486	0.300843	0.730912	0.464467	0.484445	-0.263334	0.680098	2.2454	0.0103891	1.42713	0.0628207	1.00261	0.115376	1.1949	0.150446	0.313429	0.697251	-0.248859	0.698182	-0.303957
4-hydroxybutyrate (GHB)	-0.49459	0.606539	0.666816	0.685246	-1.33227e-15	0.696003	0.1317	0.521406	0.190386	0.529101	0.380502	0.641474	-0.49459	0.383678	0.0121297	0.390824	-1.33227e-15	0.436492	0.1317	0.410238	-0.4643	0.583298	0.380502	0.419685	-0.382777	0.749835	-0.877367	0.387957	-0.877367	0.45287	-0.599482	0.190588	0.0673341	0.944435	-0.599482	0.18177	-0.877367	0.362714	-0.865237	0.379693	-0.877367	0.371987	-0.467782	0.300358	-0.396966	0.401767	-0.218979	0.730094	-0.49459
13-HODE + 9-HODE	-0.59129	0.606539	-0.276624	0.716546	0.103506	0.91209	-1.1844	0.166318	-0.402157	0.501799	-0.436168	0.641474	-1.28991	0.00956243	-1.33704	0.004575	-1.34003	0.056454	-1.88302	0.0173851	-1.46258	0.00681488	-1.8797	0.00228589	1.62436	0.00696895	1.28354	0.00963989	1.23326	0.0452287	0.760796	0.366436	0.734642	0.348962	1.06449	0.146658	0.334449	0.352066	-0.053501	0.890894	-0.106768	0.776133	-1.12222	0.161001	-0.727934	0.31527	-0.815212	0.291494	-0.340819
3-hydroxyarachidate*	0.464538	0.563759	0.599331	0.666106	-1.66533e-16	0.696003	-0.21423	0.595605	0.0105153	0.98533	-0.0204694	0.990811	0.0696063	0.813248	-0.260391	0.621461	0.394897	0.538758	-0.609161	0.202361	-0.849207	0.0592082	0.374428	0.234465	-0.671437	0.0650545	-0.288106	0.597941	-0.923293	0.0260349	-0.0424427	0.938112	0.475682	0.4011	-0.758836	0.0845186	-0.601831	0.142998	-0.548497	0.163809	-0.528396	0.328484	-0.651604	0.138707	-0.373525	0.401767	-0.384408	0.430783	0.383331
5-hydroxyhexanoate	0	NA	-0.0716466	0.685246	-1.66533e-16	0.696003	0	NA	0	NA	0	NA	0	NA	-0.0716466	0.390824	-1.66533e-16	0.436492	0	NA	0	NA	0	NA	-0.222521	0.172779	-0.150874	0.397854	-0.222521	0.241335	0	NA	0	NA	0	NA	-0.222521	0.159498	-0.222521	0.166086	-0.222521	0.167429	0	NA	0	NA	0	NA	0.0716466
3-hydroxydecanoate	0.199411	0.520805	0.0291939	0.963302	0.0964744	0.825287	0.140667	0.569854	0.11763	0.458507	0.0700375	0.845615	-0.135179	0.436519	-0.444076	0.0140802	-0.1836	0.461439	-0.193923	0.30176	-0.355639	0.0815458	-0.210036	0.156453	-0.133249	0.29839	0.182524	0.213549	-0.0841416	0.472991	-0.220208	0.590542	-0.0746531	0.884521	-0.274038	0.50539	-0.268427	0.119639	-0.261552	0.0426445	-0.267741	0.151631	-0.414131	0.297181	-0.430292	0.272198	-0.484074	0.231049	0.315772
3-hydroxyhexanoate	0.0143154	0.606539	-0.156465	0.865059	-0.237945	0.793437	0.000840164	0.521406	2.80867e-16	0.501799	2.80867e-16	0.641474	2.80867e-16	0.383678	-0.335664	0.247087	-0.300162	0.436492	-0.0134753	0.435998	-0.179199	0.408512	-0.0622166	0.419685	-0.0795423	0.389019	0.256121	0.378042	0.22062	0.497455	-0.537287	0.053584	-0.372403	0.284682	-0.489385	0.0767279	-0.0795423	0.362714	-0.0795423	0.373574	-0.0795423	0.371987	-0.550762	0.0413217	-0.551602	0.0417727	-0.551602	0.043674	0.335664
3-hydroxyoctanoate	-0.364752	0.520805	-0.696055	0.592682	-0.203896	0.863408	-2.80867e-16	0.521406	-2.80867e-16	0.501799	-2.80867e-16	0.641474	-0.364752	0.265504	-0.809816	0.195975	-0.706632	0.228009	-2.80867e-16	0.410238	-0.113761	0.408512	-0.502735	0.174233	-0.8044	0.115998	-0.359337	0.594404	-0.462521	0.45287	-0.982486	0.189312	-0.868726	0.265845	-0.479751	0.538144	-1.16915	0.00889826	-1.16915	0.00936541	-1.16915	0.00997358	-0.982486	0.167857	-0.982486	0.171961	-0.982486	0.181557	0.445064
3-hydroxylaurate	-0.0275464	0.992404	0.568501	0.622296	-0.160101	0.863408	0.938125	0.380203	1.02317	0.177342	-0.0144192	0.990811	-0.722538	0.0505502	-1.1214	0.00179527	-0.277419	0.616509	0.243133	0.696946	-0.666732	0.360918	-0.131736	0.803983	-0.641064	0.0235252	-0.293557	0.0863202	-0.23744	0.401349	-1.05917	0.190588	-0.115613	0.900976	-0.788097	0.279795	-1.3636	0.000157706	-1.41496	5.65966e-05	-0.514858	0.108272	-0.816033	0.296585	-0.782345	0.319952	-0.919834	0.226995	0.347507
2-hydroxypalmitate	-0.41172	0.520805	-1.01269	0.303304	0.598725	0.749625	-0.256366	0.521406	-0.803995	0.177342	-1.47507	0.583055	0.0368621	0.875216	-0.805122	0.0919864	1.24187	0.410542	0.192216	0.594899	-0.596425	0.254996	-0.831927	0.349998	0.629169	0.0860455	2.01706	0.000747234	2.82896	0.00140931	0.0735301	0.829271	0.860446	0.105566	3.28377	0.000188819	0.666031	0.0720316	1.21194	0.0215304	4.07083	0.0016072	0.265746	0.245613	0.264022	0.20702	2.45184	0.00213078	1.38789
3-hydroxybehenate*	0.0838337	0.70677	-0.420639	0.752447	0.488315	0.808235	-0.405953	0.521406	-0.00224739	0.996342	-0.408277	0.772213	0.656976	0.105383	-1.50354	0.0049223	0.744139	0.319777	0.16719	0.579021	-1.08515	0.0720782	-0.152453	0.858074	-1.34446	0.0117105	0.539114	0.356848	-0.753631	0.202565	-0.949222	0.0356695	0.42988	0.492621	0.04609	0.955026	-0.687486	0.216638	-0.964425	0.0477347	-0.0094917	0.986095	-0.782033	0.107256	-0.655266	0.154256	-0.106363	0.87283	1.88358
2-hydroxystearate	-0.0784227	0.96204	-0.721238	0.544685	1.75692	0.696003	0.0578721	0.92224	-0.957143	0.215722	-1.92109	0.379858	-0.557578	0.249213	-0.744757	0.239665	1.60562	0.227239	-0.421284	0.387647	-0.980662	0.0720782	-2.07238	0.0915818	0.163839	0.752953	2.10666	0.00204526	2.75725	0.00974089	-0.0729138	0.852832	1.22709	0.0516588	4.35584	0.000300579	-0.393739	0.278202	1.3619	0.0305011	4.36287	0.000114851	-0.494197	0.327971	0.246428	0.508092	2.28345	0.0208791	1.94282
folate	-0.130616	0.704295	-0.509007	0.451572	0.0899696	0.93023	-0.636128	0.0735862	-0.140622	0.722281	-0.287242	0.641474	-1.56111	3.61889e-05	-1.64787	0.00125929	-0.952842	0.19854	-2.06662	3.51414e-05	-1.27949	0.00313311	-1.33005	0.000431393	0.122647	0.524589	0.513288	0.122997	0.0105516	0.982581	-0.272129	0.144015	-0.25988	0.279196	-0.16364	0.314351	-1.43846	5.54791e-06	-1.13459	0.000328171	-0.942291	0.00298908	-2.33875	1.91219e-06	-1.53937	0.000299157	-1.49369	0.000151576	0.39064
shikimate	-0.203299	0.936802	0.494852	0.511139	-0.324502	0.793437	0.635403	0.584972	1.62442	0.178324	0.879282	0.731692	-2.08441	0.0216468	0.031307	0.961466	0.621561	0.461067	-1.2457	0.226942	1.16088	0.117062	1.82535	0.201998	1.28367	0.0781989	-0.410813	0.333607	-1.20303	0.0174388	-0.378026	0.470894	-1.37436	7.70624e-05	-2.98593	1.23158e-05	-0.800735	0.110674	-0.379506	0.44753	-0.581467	0.311047	-1.62373	0.0452474	-0.213481	0.734539	-1.16058	0.339484	-1.69448
2-dimethylaminoethanol	-1.0031	0.41334	-0.525094	0.685246	0.193884	0.863408	0.0929632	0.883232	-0.10404	0.894069	0.727626	0.358319	-2.07598	0.00599474	-1.02584	0.140314	-0.884177	0.101543	-0.979923	0.109865	-0.604787	0.204392	-0.350435	0.491094	-2.58052	0.000574535	-3.75252	0.000165072	-4.82557	3.22274e-05	-3.87701	9.30109e-05	-4.57101	3.10276e-06	-4.92508	2.23701e-06	-4.6565	4.29991e-06	-4.77836	4.31907e-06	-5.70975	1.04485e-07	-4.85693	1.06546e-07	-5.17579	4.82868e-07	-5.27551	6.66177e-07	-1.172
gluconate	-0.960819	0.0818187	-1.03074	0.282483	-0.750357	0.825287	0.604969	0.58548	0.827355	0.320804	-0.113936	0.944836	-1.86895	0.0124898	-1.73645	0.014636	-1.19496	0.436492	-0.303158	0.623575	0.121636	0.806661	-0.558537	0.419685	2.14437	0.000274358	1.46833	0.013625	0.228716	0.848826	2.02249	0.00149341	1.27653	0.0293121	0.317296	0.440829	0.275427	0.64999	-0.268129	0.578393	-0.966241	0.0284943	1.71933	0.0248772	1.39816	0.0145452	-0.241241	0.729869	-0.676047
homocitrate	1.07363	0.0355813	0.96158	0.352337	1.05902	0.696003	3.34013	0.0735862	3.49738	0.00117564	1.23814	0.668638	-4.43442	9.33383e-07	-3.98191	9.06789e-05	-0.367616	0.85155	-2.16792	0.0407839	-1.44611	0.025179	-0.188491	0.867119	-2.40298	3.24686e-05	-2.4933	0.000169866	-4.19488	0.000538979	0.179024	0.383427	-0.0233432	0.958915	-1.62749	0.000878632	-6.8374	4.82361e-09	-6.47521	4.21193e-07	-4.5625	0.00436105	-1.9889	0.0351714	-1.46946	0.000826351	-1.81598	0.0766726	-0.090313
2-isopropylmalate	1.63414	0.0355813	1.20763	0.26908	2.62461	0.0114058	1.88527	0.380203	0.657889	0.186089	-0.0225412	0.990811	-2.02388	0.00010059	-0.651157	0.184188	2.35781	0.0134912	-1.77275	0.154117	-1.2009	0.0381418	-0.289338	0.683123	-0.932669	0.032174	-0.542062	0.270161	-2.43593	0.00112381	-0.390527	0.219004	-0.426429	0.355328	-0.903315	0.000806847	-2.95655	2.6134e-06	-1.19322	0.00475073	-0.0781166	0.863956	-2.16328	0.0547145	-1.62732	0.000386691	-1.19265	0.0886636	0.390608
2,3-dihydroxyisovalerate	-0.651075	0.129714	-0.433124	0.688152	-0.951334	0.696003	1.70127	0.326337	1.41515	0.0500155	-0.690778	0.645951	-4.15264	5.32477e-07	-3.41107	2.05164e-05	0.196308	0.844289	-1.8003	0.0767815	-1.56279	0.0312938	0.456865	0.517452	-0.473284	0.0292723	-0.269434	0.417622	-1.70247	0.0143254	-0.955565	0.00475298	-0.533764	0.267473	-2.48501	5.2367e-06	-4.62593	1.59919e-08	-3.6805	7.02914e-08	-1.50616	0.0129246	-2.75586	0.00807989	-2.09656	0.00118608	-2.02814	0.0120655	0.20385
quinate	3.14654	0.00428771	3.88891	0.0046102	3.82357	0.037523	3.12089	0.0735862	3.86723	2.7592e-05	1.07417	0.641474	-2.05242	0.00251259	-2.86458	0.00030729	0.221264	0.870766	-2.07808	0.0214949	-2.88626	2.50057e-05	-2.52814	0.0455177	-2.25675	4.76965e-05	-2.06545	0.00138959	-3.35105	0.00205353	-3.14785	9.75201e-05	-2.21417	6.62214e-05	-3.56511	3.98795e-07	-4.30917	1.42263e-05	-4.93003	2.00789e-07	-3.12978	0.00234149	-5.22592	2.19779e-05	-5.10043	4.98246e-09	-6.09325	0.000224547	0.191303
pyrraline	-0.799997	0.259745	-0.387532	0.685246	-6.66134e-16	0.696003	5.61733e-16	0.521406	5.61733e-16	0.501799	5.61733e-16	0.641474	-0.799997	0.0652786	-0.387532	0.390824	-6.66134e-16	0.436492	5.61733e-16	0.410238	5.61733e-16	0.408512	5.61733e-16	0.419685	0.0725445	0.88268	-0.339921	0.519739	-0.727452	0.0541911	-5.61733e-16	0.392956	-5.61733e-16	0.419479	-5.61733e-16	0.39237	-0.727452	0.0244657	-0.727452	0.0255093	-0.727452	0.0269446	-5.61733e-16	0.361953	-5.61733e-16	0.375707	-5.61733e-16	0.387243	-0.412465
histidinol	-0.309423	0.606539	0	NA	0	NA	0	NA	0	NA	0	NA	-0.309423	0.383678	0	NA	0	NA	0	NA	0	NA	0	NA	-2.84168	7.96736e-05	-3.1511	1.95097e-09	-3.1511	6.26056e-08	-0.5841	0.201035	-0.5841	0.219311	-0.5841	0.191979	-3.1511	2.9621e-10	-3.1511	3.87325e-10	-3.1511	8.33056e-10	-0.5841	0.181137	-0.5841	0.185405	-0.5841	0.196174	-0.309423
stachydrine	1.05861	0.50957	0.390249	0.914297	0.565647	0.696003	0.316847	0.835097	0.813053	0.341879	-0.469896	0.817014	-1.67804	0.121251	-1.40312	0.107262	-0.972628	0.35718	-2.41981	0.0288144	-0.980314	0.362554	-2.00817	0.0371675	0.122242	0.883092	-0.727353	0.350333	-0.177336	0.694571	0.959099	0.00169406	-0.558861	0.533119	0.166554	0.609459	-1.5558	0.014489	-2.13047	7.02213e-06	-1.14996	0.0597324	-1.46071	0.109569	-1.53918	0.0130616	-1.84162	0.0235644	-0.849595
(S)-a-amino-omega-caprolactam	-0.109315	0.843816	-0.766357	0.104021	-0.0205525	0.99045	-0.156026	0.858132	0.767532	0.46874	0.730897	0.665686	-2.01862	6.23472e-05	-3.4438	0.00029436	-2.11229	0.169969	-2.06533	0.00936474	-1.90991	0.00385667	-1.36084	0.0407284	-1.91133	3.90821e-05	-1.10969	0.000155149	-2.27844	0.0110044	-1.81874	2.54723e-05	-1.67413	0.000106686	-2.09708	7.54679e-07	-3.92996	1.23564e-08	-4.55348	1.39701e-05	-4.39073	0.000271838	-3.88407	0.000107044	-3.58404	2.14502e-05	-3.45792	0.000135654	0.801647
erythritol	1.05762	0.0191084	0.625882	0.279199	6.66134e-16	0.696003	0.277562	0.521406	8.426e-16	0.501799	0.236903	0.641474	-0.116446	0.281017	-0.747507	0.0243902	6.66134e-16	0.436492	-0.896501	0.043831	-1.37339	2.92892e-05	0.236903	0.419685	-3.40459	1.76188e-07	-2.77353	2.46447e-05	-3.52104	1.32224e-07	-2.49545	6.99744e-06	-2.29612	2.44479e-06	-3.66951	6.42731e-10	-3.52104	6.63344e-10	-3.52104	8.25008e-10	-3.52104	1.73141e-09	-3.39195	7.10511e-06	-3.66951	3.31492e-10	-3.43261	3.18305e-06	0.631061
ethyl beta-glucopyranoside	-0.249192	0.606539	0.125958	0.915617	-0.190552	0.696003	5.61733e-16	0.521406	-0.0414319	0.501799	0.347955	0.641474	-0.249192	0.383678	-0.113292	0.542975	-0.190552	0.436492	5.61733e-16	0.410238	-0.280682	0.408512	0.347955	0.419685	-0.101335	0.843021	-0.195802	0.654411	-0.159974	0.74983	-0.846921	0.211812	-0.566238	0.45838	-0.846921	0.202311	-0.350526	0.362714	-0.309094	0.43154	-0.350526	0.371987	-0.846921	0.191345	-0.846921	0.195147	-0.498966	0.51633	-0.0944675
3-dehydroshikimate	-1.40433e-16	0.606539	-1.40433e-16	0.685246	0	NA	2.10475	0.332394	1.97392	0.321022	1.19069	0.68128	0.47719	0.0960608	0.150695	0.390824	0.147699	0.538758	2.58194	0.0412115	2.12461	0.13334	1.33839	0.419685	1.40433e-16	0.389019	1.40433e-16	0.387957	0	NA	1.40433e-16	0.392956	1.40433e-16	0.419479	1.40433e-16	0.39237	0.47719	0.0782338	0.150695	0.373574	0.147699	0.371987	2.58194	0.0266914	2.12461	0.107543	1.33839	0.387243	-1.40433e-16
1,2,3-butanetriol	-0.293345	0.824438	0.0925577	0.963302	-0.292557	0.835223	0.118509	0.521406	0.114671	0.501799	0.194712	0.641474	-0.484673	0.383678	-0.663729	0.109406	-0.575653	0.275512	-0.0728194	0.78084	-0.641616	0.157583	-0.0883841	0.844614	-3.05719	0.000913144	-2.87814	0.000268127	-2.96621	0.000759277	-3.32236	6.99744e-06	-2.7574	0.000229953	-3.23059	1.51472e-05	-3.54187	5.59317e-07	-3.54187	6.42293e-07	-3.54187	1.04759e-06	-3.39518	1.14123e-07	-3.39901	5.94839e-08	-3.31897	1.77669e-06	0.179056
mannonate*	0.910426	0.437265	-0.41951	0.699793	-0.0278405	0.954896	0.152409	0.929323	0.575985	0.557914	-0.339586	0.871766	2.57571	0.0171095	2.08155	0.0335522	1.47829	0.117351	1.81769	0.139318	3.07705	0.000132127	1.16654	0.197322	-1.16469	0.00598766	-0.116931	0.805679	-1.01574	0.0125598	-0.219777	0.72697	-0.501949	0.229575	-1.00909	0.00596553	1.41101	0.124774	1.96462	0.022935	0.462548	0.441292	1.59791	0.0939176	2.5751	4.48822e-05	0.157454	0.854279	1.04776
levulinate (4-oxovalerate)	2.80867e-16	0.606539	-0.770535	0.504293	-0.490028	0.696003	2.80867e-16	0.521406	2.80867e-16	0.501799	2.80867e-16	0.641474	2.80867e-16	0.383678	-0.910553	0.117246	-0.490028	0.267183	2.80867e-16	0.410238	-0.140018	0.408512	2.80867e-16	0.419685	-2.80867e-16	0.389019	0.910553	0.107576	0.490028	0.161411	-2.80867e-16	0.392956	0.140018	0.419479	-2.80867e-16	0.39237	-2.80867e-16	0.362714	-2.80867e-16	0.373574	-2.80867e-16	0.371987	-2.80867e-16	0.361953	-2.80867e-16	0.375707	-2.80867e-16	0.387243	0.910553
3-formylindole	-1.74321	0.22143	-0.790701	0.494076	0.32766	0.841296	-0.0787726	0.889968	-0.294857	0.172711	-0.610319	0.462829	-2.20146	0.00601152	-1.95832	0.00181013	-1.84494	0.0768382	-0.537021	0.410238	-1.46247	0.0067461	-2.78292	5.13849e-05	0.167355	0.751273	0.637626	0.146988	1.00969	0.0972938	-1.48675	0.0231492	-0.0639692	0.890147	1.42645	0.00095576	-2.0341	0.000184305	-1.32069	2.90831e-06	-0.835258	0.0304655	-2.02377	1.79506e-05	-1.52644	2.14723e-06	-1.35647	3.64795e-06	0.470271
N-carboxymethylalanine	-0.11133	0.606539	-0.578241	0.773866	0.485495	0.862837	0.930604	0.521406	1.38463	0.386109	0.527577	0.871766	-0.11133	0.383678	-0.742628	0.390824	-1.45471	0.302045	0.930604	0.410238	1.22024	0.277052	-1.41263	0.419685	0.11133	0.389019	0.742628	0.387957	2.03538	0.0236422	0	NA	0.164387	0.419479	2.52087	0.00414901	0	NA	0	NA	0.580667	0.357556	0.930604	0.361953	1.38463	0.178278	1.10824	0.387243	0.631298
3-indoleglyoxylic acid	-0.388801	0.31117	-0.785262	0.704225	0.956037	0.696003	-0.305744	0.730367	-0.0907682	0.925884	-0.455789	0.789523	0.253789	0.621672	0.30498	0.741775	-1.01178	0.413198	0.336846	0.423921	0.999474	0.197546	-2.4236	0.0121247	-0.284618	0.382769	1.07532	0.218167	2.09517	0.0228262	-1.58956	5.27545e-06	-0.626084	0.284052	2.13506	0.000125995	-0.0308293	0.954225	1.3803	0.0172488	1.08339	0.0616538	-1.25272	0.0111289	0.37339	0.400042	-0.28854	0.666207	1.35994
mannitol/sorbitol	0.357759	0.872164	2.26137	0.104123	0.10039	0.897511	0.552019	0.647281	2.98578	0.00733859	0.0859518	0.990811	-0.930853	0.217317	-1.35961	0.0303546	1.16501	0.436492	-0.736592	0.52335	-0.635207	0.421299	1.15057	0.419685	0.71653	0.305369	-1.25422	0.0150856	-2.88508	0.000363505	0.269069	0.72697	0.201929	0.784912	-3.58991	2.39587e-07	-0.214323	0.514063	-2.61383	0.000206	-1.72007	0.0911799	-0.467523	0.547903	-0.433278	0.345606	-2.43934	0.061235	-1.97075
fructose	0.173986	0.968958	0.699958	0.573923	-0.455419	0.838733	1.41996	0.402049	2.78757	0.0233162	-0.0964205	0.986174	-0.510999	0.344532	-2.38452	0.00761109	1.09246	0.512244	0.734976	0.588195	-0.296907	0.641127	1.45146	0.287712	2.48104	0.00542104	2.62837	0.00476562	0.292513	0.762837	1.91436	0.186034	2.58766	0.0210572	-0.903576	0.336608	1.97004	0.00528581	0.243859	0.720856	1.38497	0.198495	2.64934	0.0391933	2.29076	0.0370417	0.547882	0.705487	0.147331
mannose	-0.340957	0.851448	-1.06179	0.544685	-0.952326	0.696003	-0.0255426	0.967126	-0.434881	0.560116	-1.86798	0.159707	-1.71194	0.00512918	-2.12633	0.00268374	0.86632	0.157294	-1.39653	0.172672	-1.49942	0.125067	-0.0493382	0.953338	5.12984	1.25378e-05	5.9421	8.76084e-07	3.66594	5.2086e-05	4.70561	0.000292558	4.79703	0.000446393	2.63035	0.00270558	3.4179	6.85939e-08	3.81577	5.55395e-06	4.53226	2.72418e-07	3.30909	0.000209602	3.29761	8.47284e-05	2.58101	0.000509084	0.812252
galactose 1-phosphate	0.514066	0.851448	0.250581	0.685246	3.33067e-16	0.696003	1.86648	0.508179	2.19986	0.117816	0.567296	0.767661	0.877435	0.350166	-8.426e-16	0.390824	0.175416	0.538758	2.22985	0.220539	1.94928	0.0745807	0.742712	0.419685	0.938149	0.175883	8.426e-16	0.387957	-3.33067e-16	0.339103	1.45222	0.199249	0.250581	0.419479	8.426e-16	0.39237	1.81558	0.00785094	8.426e-16	0.373574	0.175416	0.371987	3.68207	0.00834401	2.19986	0.0290524	0.742712	0.387243	-0.938149
gamma-glutamylcysteine	-1.77188	0.606539	1.0454	0.704225	-0.432191	0.696003	0.426654	0.579318	-0.0560973	0.956187	0.476453	0.819582	-4.59672	0.00323836	-0.52155	0.508186	-0.154466	0.833222	-2.39819	0.160163	-1.62305	0.211695	0.754178	0.419685	-7.01138	0.000310623	-10.75	1.37077e-06	-11.2306	9.20988e-07	-6.58237	0.00135915	-7.50368	0.00029478	-9.46192	3.53257e-11	-11.6081	5.68542e-11	-11.2715	2.39592e-08	-11.3851	8.55322e-09	-8.98056	5.35949e-07	-9.12673	4.20762e-08	-8.70774	1.1339e-05	-3.73859
gamma-glutamylglycine	-0.207533	0.868164	0.407702	0.843786	-0.0729512	0.960728	0.513914	0.508179	-0.306476	0.41638	-0.325511	0.68128	-2.34446	0.000288549	-0.258527	0.687987	0.209996	0.794239	-1.62302	0.0199308	-0.972705	0.11057	-0.0425637	0.924926	-1.65987	0.00301684	-3.4155	0.000609403	-3.22708	0.000808998	-2.27052	0.000829855	-3.41091	0.000476446	-3.70315	1.01563e-05	-4.00433	8.94525e-09	-3.67402	9.51321e-07	-3.01709	4.51079e-05	-3.89354	8.81426e-06	-4.38362	6.00563e-09	-3.74572	1.65168e-06	-1.75563
gamma-glutamylserine	-0.0700317	0.96204	-0.101222	0.963302	0.720116	0.831692	0.112379	0.896211	0.0941346	0.90868	0.0149455	0.990811	-2.90725	0.000235376	-2.46018	0.00879307	-0.815513	0.541316	-2.72484	0.00180842	-2.26482	0.00491044	-1.52068	0.0937955	-3.24156	3.13969e-05	-3.35949	0.00133319	-4.75401	0.0026084	-2.76075	6.27874e-05	-2.90986	3.02803e-05	-3.48305	0.000205142	-6.14881	2.86461e-07	-5.81967	8.29939e-08	-5.56952	7.55972e-07	-5.48559	5.60759e-06	-5.17469	8.76947e-06	-5.00373	2.07357e-05	-0.117925
gamma-glutamylleucine	-0.799636	0.162188	0.180685	0.778771	0.826721	0.696003	5.61733e-16	0.521406	-0.363976	0.141936	-0.293047	0.647314	-2.53201	6.37306e-09	-1.85201	0.000530089	-1.24522	0.233546	-1.73238	0.000745107	-2.39667	2.87939e-10	-2.36499	0.000180525	-2.46301	1.50185e-07	-2.77904	2.4716e-05	-3.13985	0.00277547	-2.05614	0.00037118	-1.39185	5.55877e-05	-1.10662	0.00382013	-4.99502	2.00793e-11	-4.63105	1.01109e-08	-4.38506	8.53683e-07	-3.78852	4.01801e-08	-3.78852	2.26309e-08	-3.4716	1.33981e-06	-0.316029
gamma-glutamyl-2-aminobutyrate	0.0505246	0.989048	0.657412	0.274761	-0.267749	0.737048	0	NA	0	NA	0.25433	0.725672	-0.89991	0.0614316	-0.353353	0.140314	-0.244526	0.617159	-0.950434	0.066668	-1.01076	0.00296867	0.277553	0.419685	-3.43994	8.13219e-05	-3.9865	1.37077e-06	-3.83768	1.30324e-05	-3.76048	8.26552e-05	-3.70015	6.29794e-06	-4.47649	1.8852e-07	-4.33985	1.45688e-09	-4.33985	2.04041e-09	-4.08221	1.2632e-06	-4.71091	1.08541e-08	-4.71091	4.98246e-09	-4.19893	1.20034e-06	-0.546557
gamma-glutamylisoleucine*	-1.30645	0.068016	-0.0351039	0.98	0.53372	0.825287	-0.811376	0.0735862	-0.875801	0.0254919	-0.406241	0.641474	-2.78012	9.49787e-06	-1.46177	0.0140624	-1.02454	0.390142	-2.28504	0.000403701	-2.30247	4.22137e-06	-1.96451	0.00302522	-2.94173	2.38728e-06	-3.04063	0.000178292	-3.095	0.00341715	-1.33088	0.00408252	-0.158431	0.196566	0.356027	0.40746	-5.72185	4.89509e-09	-4.5024	4.24375e-08	-4.11954	1.43557e-05	-3.61592	1.02931e-08	-2.4609	2.57756e-07	-1.60848	5.19642e-06	-0.0988976
gamma-glutamylalanine	-0.241293	0.563759	1.03811	0.413536	0.337068	0.91209	-0.300171	0.570074	0.0294624	0.944621	0.000877386	0.997711	-0.624083	0.0575062	0.919174	0.147776	0.332276	0.814081	-0.682961	0.0845318	-0.0894688	0.821928	-0.00391444	0.995817	-1.33455	0.000637405	-2.28549	0.00333678	-1.47788	0.198978	-1.60677	5.81606e-06	-1.2783	0.00484704	-1.17173	0.175199	-1.95864	4.33882e-05	-1.36631	0.000329253	-1.1456	0.0071093	-2.28973	8.78381e-05	-1.36777	5.7216e-05	-1.17565	9.73645e-05	-0.950931
gamma-glutamylglutamine	-0.181233	0.606539	1.08002	0.249829	-0.147162	0.96307	0.305554	0.601835	0.604218	0.177342	-0.21396	0.863573	-4.49748	5.32477e-07	-3.16924	0.000329357	-1.98137	0.247929	-4.01069	8.83901e-05	-3.64504	7.66777e-06	-2.04817	0.0214676	-1.88746	4.13486e-06	-1.83108	0.00335956	-2.01892	0.125088	-1.0118	0.00037118	0.305835	0.164098	-1.10918	0.0514752	-6.38494	1.45688e-09	-5.00032	3.68604e-08	-4.00029	1.91739e-06	-5.02249	2.51226e-06	-3.33921	3.35698e-07	-3.15736	0.000108016	0.0563789
gamma-glutamyltryptophan	-0.0188658	0.606539	0.0592586	0.963302	-1.66533e-16	0.696003	-1.40433e-16	0.521406	-1.40433e-16	0.501799	-1.40433e-16	0.641474	-0.0188658	0.383678	-0.337124	0.311291	-1.66533e-16	0.436492	-1.40433e-16	0.410238	-0.396382	0.153994	-1.40433e-16	0.419685	-3.77145	2.95545e-10	-3.45319	1.28538e-05	-3.79032	7.0243e-09	-0.44952	0.199962	-0.0531379	0.908902	-0.44952	0.190479	-3.79032	2.00793e-11	-3.79032	2.71597e-11	-3.79032	4.54338e-11	-0.44952	0.179697	-0.44952	0.184041	-0.44952	0.194648	0.318258
gamma-glutamylglutamate	-0.33345	0.616726	0.469589	0.583332	-0.73571	0.831764	0.516479	0.521406	-1.4854	0.000520123	-1.27933	0.462479	-3.21736	7.29949e-06	0.0735393	0.852937	1.34526	0.321919	-2.36743	0.00943664	-1.88145	4.6927e-05	0.801641	0.424809	-2.83304	2.19133e-05	-2.92134	6.74655e-05	-2.82121	0.0119478	-2.60571	8.50523e-05	-1.89097	3.62977e-05	-2.99614	0.00330463	-6.0504	2.00793e-11	-2.8478	2.33239e-07	-1.47595	0.00865336	-4.97314	3.01319e-05	-3.77243	6.3507e-09	-2.1945	0.00339889	-0.0883012
gamma-glutamylhistidine	-0.61886	0.452702	-0.123808	0.914297	-0.0139066	0.996127	-1.06534	0.304064	-1.09322	0.000611284	-0.937394	0.411008	-3.05763	7.94962e-05	-1.87814	2.55002e-05	-0.0570094	0.959377	-3.50411	0.000507011	-2.84755	0.000105705	-0.980496	0.0432856	-2.9984	4.04357e-05	-1.81782	1.74774e-05	-2.94116	0.00546907	-1.74833	0.000688446	-0.0726948	0.862631	-1.08614	0.00763604	-6.05603	9.24944e-09	-3.69595	1.27086e-09	-2.99817	9.481e-05	-5.25244	4.51724e-06	-2.92024	1.31217e-07	-2.06663	4.43181e-05	1.18058
gamma-glutamyltyrosine	-1.32022	0.16406	0.0383972	0.980611	-0.468849	0.793437	-2.80867e-16	0.521406	-2.80867e-16	0.501799	-2.80867e-16	0.641474	-1.32022	0.0258824	-1.64453	0.00356353	-1.50429	0.0722301	-2.80867e-16	0.410238	-1.68293	0.00152371	-1.03544	0.0121083	-4.64157	4.25222e-05	-4.31726	1.91924e-05	-4.4575	0.000216991	-1.50662	4.24624e-05	0.176305	0.658969	-0.47118	0.185169	-5.96179	3.74038e-10	-5.96179	5.14414e-10	-5.96179	1.06861e-09	-1.50662	1.36188e-05	-1.50662	1.2866e-05	-1.50662	1.69385e-05	0.324313
gamma-glutamylphenylalanine	-0.550055	0.406422	0.605408	0.622296	0.702923	0.706841	5.61733e-16	0.521406	5.61733e-16	0.501799	5.61733e-16	0.641474	-0.550055	0.143052	-0.720295	0.201053	-0.790878	0.234029	5.61733e-16	0.410238	-1.3257	7.08162e-05	-1.4938	0.0188666	-3.59225	2.25384e-05	-3.422	0.000235139	-3.35142	0.000466911	-1.50405	0.00993327	-0.178345	0.74465	-0.010247	0.986257	-4.1423	7.85152e-11	-4.1423	1.03849e-10	-4.1423	2.13406e-10	-1.50405	0.00757711	-1.50405	0.00776446	-1.50405	0.00811311	0.170241
gamma-glutamylmethionine	-1.13638	0.0818187	0.101043	0.963302	-0.698728	0.821888	0	NA	0	NA	-1.1661	0.348972	-1.6148	0.00011215	-1.077	0.107799	-0.728769	0.538758	-0.478418	0.116675	-1.17804	0.0120176	-1.19614	0.121532	-3.14634	5.72512e-06	-3.68414	0.000348826	-2.86627	0.00590157	-2.70088	2.65598e-05	-2.00125	0.000758531	-1.98315	0.0112592	-4.76114	3.06495e-11	-4.76114	3.94065e-11	-3.59504	0.000109548	-3.17929	3.09007e-11	-3.17929	3.09007e-11	-3.17929	3.09577e-11	-0.537799
gamma-glutamylvaline	-0.690731	0.24445	0.349495	0.77033	0.247944	0.863408	-0.590823	0.508179	-1.06384	0.0199277	-0.565636	0.583055	-3.72041	3.46979e-05	-1.28324	0.0357666	-0.999091	0.305604	-3.6205	3.51414e-05	-2.69657	4.6927e-05	-1.81267	0.00113927	-2.15437	5.32562e-05	-2.19134	0.00288847	-1.8581	0.0138879	-1.56794	0.00037555	-0.564685	0.0065163	-0.332995	0.313906	-5.87478	2.86461e-07	-3.47458	4.12006e-08	-2.85719	8.81506e-05	-5.18844	4.01801e-08	-3.26126	2.22514e-06	-2.14567	2.64104e-06	-0.0369723
gamma-glutamylthreonine	0.628687	0.112682	0.800719	0.279199	0.60918	0.696003	0.667653	0.521406	1.21581	0.0280207	1.0444	0.641474	-1.91206	0.000133626	-2.05267	0.000988497	-2.93386	0.0544454	-1.87309	0.00610611	-1.63758	0.00123322	-2.49865	0.0111895	-2.61722	1.43375e-05	-2.43835	0.000202284	-1.83498	0.0115226	-1.27981	0.000132406	-0.928905	0.00484704	-0.517082	0.0549575	-4.52928	3.77924e-07	-4.49101	6.20181e-07	-4.76885	0.000152027	-3.15291	0.000106589	-2.56648	2.03704e-06	-3.01573	0.00146626	0.178876
gamma-glutamyl-epsilon-lysine	-2.80867e-16	0.606539	-1.14899	0.413536	-0.156413	0.890957	-2.80867e-16	0.521406	-2.80867e-16	0.501799	-0.422958	0.686983	-2.80867e-16	0.383678	-1.98232	0.0113984	-1.33477	0.148682	-2.80867e-16	0.410238	-0.833329	0.0420213	-1.60132	0.00781437	-2.40464	1.89276e-05	-0.422319	0.516748	-0.161037	0.74983	-1.75515	0.0350406	-0.921817	0.284052	0.33204	0.676279	-2.40464	3.43527e-06	-2.40464	3.84124e-06	-1.49581	0.0115418	-1.75515	0.0295161	-1.75515	0.0300352	-1.26928	0.132921	1.98232
gamma-glutamyl-alpha-lysine	-1.13809	0.259745	-1.59377	0.00738056	-0.64768	0.696003	0	NA	-0.0693728	0.501799	-1.07659	0.287301	-1.13809	0.0651867	-3.45315	1.04556e-07	-1.82186	0.0899545	0	NA	-1.92876	8.38329e-05	-2.25078	4.36929e-05	-2.6678	0.00107431	-0.283367	0.0426245	-0.68788	0.240648	-0.697087	0.187751	1.23167	0.0508087	1.77324	0.0073328	-3.80589	2.9621e-10	-3.73651	3.33877e-09	-2.50974	0.00026645	-0.697087	0.166426	-0.697087	0.170503	-0.477535	0.365989	2.38443
glutamate, gamma-methyl ester	-0.981387	0.606539	1.37747	0.685246	-0.898194	0.696003	0.613716	0.642842	0.222407	0.903607	0.129901	0.985746	-3.25435	9.34875e-05	-0.899753	0.425406	1.38393	0.436492	-1.65924	0.256582	-2.05481	0.212981	2.41202	0.0474912	-2.01245	0.000179449	-4.07156	0.0036989	-6.74571	0.000345339	-3.9536	0.00320361	-3.65386	0.00672738	-8.60367	6.50622e-10	-5.2668	9.10707e-07	-4.97132	6.0414e-06	-5.36179	0.000300203	-5.61285	0.00017954	-5.70867	0.000664442	-6.19165	0.000184599	-2.05911
gamma-aminobutyrate (GABA)	-1.06193	0.198045	0.839865	0.33997	0.20221	0.906028	-0.0871573	0.92935	-0.15746	0.666269	-0.231032	0.883494	-2.34568	4.94784e-05	-0.259352	0.447901	0.0233293	0.979192	-1.3709	0.14294	-1.25668	0.0159101	-0.409912	0.611353	-0.47278	0.0107375	-1.85176	0.000323323	-2.19808	0.0103825	-1.68506	0.00346279	-1.16224	0.0101787	-2.14621	0.000577154	-2.81846	1.95131e-06	-2.11111	1.4934e-06	-2.17475	0.000464366	-3.05596	0.00148363	-2.41892	5.1601e-06	-2.55612	0.00247267	-1.37898
glutamate	0.127395	0.78689	0.48946	0.311375	0.289543	0.863408	0.0702706	0.896211	0.309259	0.436617	-0.0349887	0.986174	-1.32103	6.23472e-05	-1.17032	0.00203628	0.259032	0.769613	-1.37816	0.0119193	-1.35052	0.000875388	-0.065499	0.897068	-1.94036	1.25378e-05	-2.42053	3.89446e-06	-3.75607	0.0010213	-1.96265	2.09043e-05	-2.08075	2.27891e-05	-3.61621	3.71335e-06	-3.2614	5.1455e-09	-3.59085	2.50323e-07	-3.49704	9.83133e-07	-3.3408	1.68458e-05	-3.43127	2.51471e-08	-3.68171	6.48706e-06	-0.480163
S-1-pyrroline-5-carboxylate	-0.613824	0.50957	0.188603	0.959514	1.13402	0.696003	-0.473694	0.524646	-1.31928	0.0744443	-0.385516	0.814252	-1.57894	0.0308445	0.79554	0.362983	1.38828	0.220473	-1.43881	0.00704468	-0.712342	0.251063	-0.131258	0.873987	-0.560241	0.181639	-1.55824	0.0684626	-1.84119	0.0295884	-0.859324	0.0218683	-1.0549	0.043877	-0.392429	0.351669	-2.13918	0.00189631	-0.762701	0.0369025	-0.452912	0.257953	-2.29813	1.59758e-05	-1.76724	0.000870402	-0.523687	0.39888	-0.998
glutamine	-0.0666746	0.784733	0.0862947	0.915854	0.0957552	0.909918	-0.170794	0.521406	0.220274	0.322196	-0.02272	0.985888	-1.68689	1.55724e-05	-1.57695	0.0003783	-0.925588	0.13572	-1.79101	3.51414e-05	-1.44297	4.09386e-05	-1.04406	0.000295131	-0.779267	0.000175771	-0.705038	0.0123699	-1.28955	0.0101044	-1.22082	3.68532e-07	-0.993619	0.000136123	-1.56867	1.74095e-07	-2.46616	6.24529e-08	-2.28199	1.84268e-07	-2.21514	5.66013e-06	-3.01183	1.06546e-07	-2.43659	3.40024e-09	-2.61274	2.30759e-07	0.0742289
2-pyrrolidinone	-0.714604	0.457994	-2.30096	0.0286501	-0.623621	0.696003	0.667911	0.521406	0.182477	0.805892	-0.322069	0.641474	-5.33316	3.48447e-07	-4.98231	8.40334e-06	-4.93356	0.000880342	-3.95064	0.000886172	-2.49888	0.00307156	-4.63201	5.72117e-06	-0.270068	0.383885	-0.410774	0.295928	-0.347598	0.45287	0.769058	0.178826	-0.957999	0.0506192	0.782512	0.0658394	-5.60323	5.96625e-09	-5.39308	1.74821e-07	-5.28116	2.04709e-06	-3.18158	0.00046527	-3.45688	0.000131038	-3.8495	1.38422e-06	-0.140706
N-acetylglutamate	-0.0904955	0.93937	-0.924985	0.352337	-0.387802	0.736148	0.485366	0.521406	0.531209	0.040154	0.355081	0.817014	-2.40993	4.34664e-05	-2.90785	4.10994e-05	-1.4477	0.182684	-1.83407	0.00551401	-1.45166	0.0111032	-0.704821	0.124151	-2.36866	2.25384e-05	-0.928378	0.0127505	-1.80374	0.00205353	-2.44285	0.000123381	-1.83705	0.00270389	-2.17523	9.44093e-06	-4.77859	1.03254e-08	-3.83623	1.44378e-08	-3.25144	0.000436864	-4.27692	2.32706e-06	-3.28871	3.24748e-09	-2.88005	2.07622e-05	1.44029
N-acetylglutamine	0.258936	0.612559	0.0441529	0.968439	0.229485	0.835223	0.116844	0.798083	0.973621	0.00194481	-0.106344	0.880264	-3.44751	5.34585e-06	-3.30568	4.00872e-06	-0.899495	0.170207	-3.5896	7.03801e-05	-2.37621	0.000219711	-1.23532	0.00137805	-1.74924	3.13969e-05	-0.229303	0.299043	-0.799766	0.0593725	-1.3261	0.00113274	-0.0209473	0.950486	-0.406077	0.0227188	-5.19675	1.49947e-08	-3.53499	2.83033e-08	-1.69926	0.000185281	-4.9157	1.74997e-07	-2.39716	1.26647e-08	-1.6414	2.37042e-05	1.51994
alpha-ketoglutaramate*	0.050191	0.989048	-0.225984	0.945791	1.04301	0.696003	0.209665	0.837762	0.859277	0.0821433	0.920736	0.641474	-2.87692	0.000199129	-3.38823	0.00126975	-2.47337	0.115316	-2.71745	0.0137857	-2.30297	0.00406923	-2.59564	0.0185535	-1.29096	0.00349484	-0.120084	0.863191	-0.658731	0.462507	-1.64462	0.0257035	-0.749912	0.194059	-0.0195675	0.955026	-4.16788	6.74083e-06	-3.50831	2.24657e-06	-3.1321	0.000810648	-4.36206	8.01703e-05	-3.05288	6.52163e-06	-2.61521	0.0090215	1.17088
pyroglutamine*	0.147191	0.872164	0.374198	0.84925	0.283984	0.835223	-0.584376	0.521406	0.12113	0.737548	0.040685	0.982354	-0.385919	0.389266	-1.06883	0.169705	-1.38656	0.106743	-1.11749	0.0487558	-1.3219	0.0114318	-1.62986	0.000432146	-0.24509	0.414206	0.837275	0.25447	1.78253	0.0100889	-0.520953	0.138202	0.788418	0.0437231	1.64346	4.91901e-06	-0.631008	0.126354	-0.231559	0.301881	0.395966	0.236908	-1.63844	0.000824899	-0.533483	0.0247467	0.0135972	0.951095	1.08236
4-hydroxyglutamate	-0.680991	0.606539	-1.13119	0.339718	0.169184	0.882094	0.0794528	0.83838	-0.749114	0.117816	-0.78655	0.513438	-3.19725	0.00122768	-2.52919	7.37302e-05	-2.61617	0.00697158	-2.4368	0.00125136	-2.14712	0.00900448	-3.57191	0.000255642	-4.05519	0.000270727	-3.39542	1.26157e-05	-2.87858	0.000812577	-3.02263	0.000239051	-2.81307	0.00117893	-0.995848	0.00194484	-7.25244	1.71956e-09	-5.92461	5.14414e-10	-5.49475	3.35242e-08	-5.45944	5.70049e-08	-4.96018	4.39306e-07	-4.56775	1.50159e-05	0.659771
propionylglutamine	5.61733e-16	0.606539	2.94338	0.0921598	-1.24784	0.792472	5.61733e-16	0.521406	5.61733e-16	0.501799	5.61733e-16	0.641474	5.61733e-16	0.383678	-1.58622	0.0330395	-2.77723	0.200702	5.61733e-16	0.410238	-4.5296	0.00023303	-1.52939	0.00191959	-0.232045	0.172779	1.35417	0.0595078	2.54518	0.135318	-0.344361	0.190588	4.18524	0.000438732	1.18503	0.0130742	-0.232045	0.159498	-0.232045	0.166086	-0.232045	0.167429	-0.344361	0.169778	-0.344361	0.173919	-0.344361	0.183175	1.58622
glutathione, reduced (GSH)	-0.719786	0.853983	1.16868	0.750608	-0.369736	0.696003	1.22414	0.590453	0.71853	0.679553	0.783947	0.822738	-5.26923	0.00163235	-2.24434	0.130952	0.533852	0.698947	-3.32531	0.199904	-2.6945	0.121749	1.68753	0.279056	-5.71647	0.000338426	-8.75325	8.1922e-05	-11.9326	2.67896e-07	-5.93357	0.00551902	-7.08188	0.000527151	-11.7996	9.4797e-10	-10.9857	1.68558e-07	-10.9976	5.27513e-07	-11.3987	1.88071e-06	-9.25887	0.000267436	-9.77638	1.32098e-05	-10.1121	6.21936e-05	-3.03679
glutathione, oxidized (GSSG)	-0.0378894	0.96204	1.27073	0.153269	-0.834374	0.808235	-0.331652	0.695854	0.411882	0.501799	-0.462843	0.82119	-1.69335	1.58328e-05	-1.0698	0.070929	0.929782	0.522668	-1.98711	0.0150756	-1.92864	0.00215514	1.30131	0.252033	-0.304618	0.0640396	-1.409	0.00473455	-3.97584	0.00483813	-0.779618	0.0123093	-0.575381	0.114293	-5.24732	2.9841e-05	-1.99797	6.42541e-08	-2.4788	9.59212e-05	-3.04605	0.000232019	-2.76673	0.00141271	-2.50403	5.69824e-05	-3.94601	0.000722142	-1.10438
CoA-glutathione*	0.522834	0.540018	0.467823	0.709144	-0.403232	0.696003	-0.577675	0.521406	0.899611	0.321022	-0.338837	0.788903	-1.99304	0.000590213	-2.29411	0.00340864	0.330788	0.715476	-3.09355	0.00136133	-1.86232	0.0166037	0.395183	0.237078	-0.114059	0.769463	-1.12181	0.0150891	-3.68235	0.000273827	0.044278	0.90174	-1.01849	0.0859477	-4.45008	2.33683e-08	-2.1071	6.07818e-05	-3.41592	0.000109896	-3.35156	0.000244088	-3.04927	0.000311558	-2.88081	3.89326e-05	-4.0549	2.77365e-06	-1.00776
S-(1,2-dicarboxyethyl)glutathione	-1.03991	0.671161	1.44176	0.622296	-0.487798	0.854686	0.416803	0.654762	-1.32344	0.110617	-0.50501	0.641474	-3.99596	0.0020384	0.0289516	0.960688	0.555634	0.62509	-2.53925	0.0833138	-2.73625	0.071242	0.538421	0.449868	-4.75114	0.000745931	-7.3092	2.67477e-06	-7.57007	0.000178156	-5.42721	0.00113274	-5.5036	0.00229593	-7.69403	8.97968e-07	-8.74711	1.65233e-08	-7.28025	8.29939e-08	-7.01444	3.6929e-07	-7.96646	2.18945e-06	-8.23985	2.21794e-07	-7.15561	1.07541e-06	-2.55806
ophthalmate	-0.0821501	0.980205	0.649647	0.23086	0.502223	0.807206	0.852066	0.369309	1.72932	0.000151168	0.0459437	0.986174	-2.98893	0.000968144	-2.67416	5.03687e-06	-0.704182	0.522668	-2.05472	0.0181559	-1.59449	0.000668879	-1.16046	0.0828876	-2.78755	0.00170613	-3.0096	9.8772e-06	-3.83421	0.00140931	-3.47312	0.000214526	-2.96338	7.4838e-06	-3.93541	2.93832e-08	-5.77648	3.53506e-09	-5.68376	8.86488e-09	-4.53839	1.60129e-05	-5.52784	2.51471e-06	-4.55787	1.12163e-08	-5.09587	1.42715e-05	-0.222057
S-methylglutathione	1.12346	0.484495	2.23229	0.202028	-6.66134e-16	0.696003	-1.12347e-15	0.521406	-1.12347e-15	0.501799	0.253346	0.641474	-0.762451	0.167247	-0.739022	0.185773	0.000498946	0.538758	-1.88591	0.0294031	-2.97131	0.00619722	0.253845	0.419685	-3.08964	0.000377643	-3.11307	0.000467149	-3.85209	1.92484e-06	-2.23821	0.0113978	-1.15281	0.177722	-4.12412	5.8448e-09	-3.85209	1.89531e-08	-3.85209	2.83033e-08	-3.85159	5.46896e-08	-4.12412	7.28811e-09	-4.12412	2.88162e-09	-3.87027	3.02915e-06	-0.0234294
S-lactoylglutathione	0	NA	0	NA	-6.66134e-16	0.696003	0.791682	0.521406	0.250823	0.501799	0.699265	0.641474	0	NA	0	NA	-6.66134e-16	0.436492	0.791682	0.410238	0.250823	0.408512	0.699265	0.419685	0	NA	0	NA	6.66134e-16	0.339103	0	NA	0	NA	0	NA	0	NA	0	NA	0	NA	0.791682	0.361953	0.250823	0.375707	0.699265	0.387243	0
cysteinylglycine	0.0220896	0.606539	8.426e-16	0.685246	3.33067e-16	0.696003	8.426e-16	0.521406	8.426e-16	0.501799	8.426e-16	0.641474	8.426e-16	0.383678	8.426e-16	0.390824	3.33067e-16	0.436492	-0.0220896	0.410238	8.426e-16	0.408512	8.426e-16	0.419685	-3.73432	1.50185e-07	-3.73432	7.46849e-08	-3.73432	7.3467e-07	-3.11088	1.00624e-07	-3.13297	1.4494e-07	-3.13297	1.3152e-08	-3.73432	6.56899e-09	-3.73432	9.79151e-09	-3.73432	1.92916e-08	-3.13297	1.0372e-08	-3.13297	4.84025e-09	-3.13297	1.45476e-08	8.426e-16
2-aminobutyrate	0.215442	0.606539	-0.15533	0.685246	-0.0195009	0.988363	0.227883	0.521406	0.388385	0.135703	0.629318	0.641474	0.280544	0.00259448	-0.0760118	0.684112	0.0193489	0.971754	0.292985	0.387647	0.467703	0.0196649	0.668168	0.269408	0	NA	0.15533	0.387957	0.386073	0.20672	0.215442	0.392956	0	NA	0.366573	0.253463	0.280544	0.00178663	0.0793185	0.140451	0.405422	0.204967	0.508426	0.0100708	0.467703	0.0122738	1.03474	0.0269236	0.15533
2-hydroxybutyrate/2-hydroxyisobutyrate	-0.158048	0.606539	-0.334639	0.735367	-0.432965	0.696003	-0.13749	0.521406	-2.80867e-16	0.501799	0.347025	0.613383	-0.0205575	0.925961	-0.511024	0.255034	-0.913556	1.02049e-05	-2.80867e-16	0.410238	-0.176385	0.258336	-0.133566	0.75659	0.0272062	0.905286	0.380183	0.387957	0.782714	0.00165491	-0.228935	0.392956	-0.0525496	0.884521	0.251656	0.509353	0.00664876	0.97466	-0.130841	0.310646	-0.130841	0.309236	-0.228935	0.361953	-0.228935	0.375707	0.11809	0.759861	0.352976
cysteine-glutathione disulfide	0.240043	0.849904	-1.01608	0.572158	0.449428	0.825287	-1.16729	0.521406	-0.508415	0.666269	-0.753963	0.655596	-0.448974	0.41063	-1.55694	0.016526	-0.542193	0.60282	-1.8563	0.136372	-1.04928	0.381014	-1.74558	0.0908015	0.958468	0.0478957	2.54414	0.00171956	1.77341	0.0346079	-0.227706	0.627017	0.101842	0.895462	0.796619	0.0233424	0.509494	0.257867	0.987196	0.00217429	1.23122	0.0268657	-2.08401	0.0513885	-0.947436	0.286094	-0.948965	0.270718	1.58567
5-oxoproline	0.142859	0.843816	0.00416088	0.996242	0.767864	0.705422	-0.428624	0.521406	0.181487	0.806574	0.151234	0.898762	-1.61011	0.00715855	-1.64045	0.0811484	-1.83272	0.136205	-2.1816	0.000683829	-1.46313	0.0893499	-2.44935	0.0014668	-0.697804	0.046101	-0.0272968	0.977568	0.483441	0.555937	-1.07847	0.00343854	-0.546662	0.41231	0.727779	0.00660224	-2.30792	0.000460278	-1.66775	0.000453492	-1.34928	0.00639563	-3.26007	1.07145e-05	-2.00979	0.00235267	-1.72157	0.00498506	0.670507
glycerol 3-phosphate	-0.859933	0.338917	0.331143	0.84925	0.00317829	0.999796	0.952607	0.521406	0.595051	0.501799	-0.0441602	0.990811	-2.12634	0.00175919	-0.24835	0.759727	0.474711	0.698947	-0.313801	0.717091	0.0155582	0.973354	0.427372	0.701887	-0.432107	0.640825	-2.48973	0.0381404	-2.72203	0.0639506	-1.04574	0.117033	-1.91228	0.00828746	-2.47255	0.0127271	-2.55845	0.012496	-2.73808	0.0134969	-2.24732	0.025033	-1.35954	0.162487	-1.89672	0.0171786	-2.04518	0.0510694	-2.05762
glycerol	-0.0285785	0.980205	0.392693	0.514843	0.615858	0.696003	0.128829	0.782564	0.511685	0.110797	-0.0485543	0.953547	-0.858503	0.00551706	-0.320753	0.2537	0.455233	0.46969	-0.701095	0.0855665	-0.20176	0.41165	-0.209179	0.422278	-0.534517	0.0900427	-1.05509	0.00570125	-1.41627	0.0183155	-0.589631	0.0340567	-0.688929	0.0293121	-0.826944	0.00458106	-1.39302	8.39025e-05	-1.37584	0.000259652	-0.961034	0.00886529	-1.29073	0.00492086	-0.890689	0.00373783	-1.03612	0.00432868	-0.52057
glycerophosphoglycerol	-0.0501019	0.949777	0.5779	0.129806	0.271586	0.793437	0.217414	0.642842	0.541745	0.341879	0.0182278	0.990811	-1.83615	0.000277006	-1.90954	0.000400992	-0.717966	0.236929	-1.56863	0.00106272	-1.9457	0.00023303	-0.971324	0.152913	-1.03591	0.000142777	-0.969683	8.92487e-05	-1.88678	3.6626e-05	-1.38938	0.000376611	-0.695155	0.00750878	-1.91857	0.000253761	-2.87206	3.62996e-06	-2.87922	7.85974e-06	-2.60475	8.77666e-05	-2.95802	1.96245e-06	-2.64085	3.40237e-06	-2.88989	0.000295189	0.0662268
O-acetylhomoserine	-1.35848	0.578672	1.12599	0.666476	0.292611	0.793437	1.1368	0.521406	1.77954	0.243211	1.25244	0.641474	-3.31919	0.00122882	-1.4436	0.054029	0.458522	0.538758	-0.823911	0.623544	-0.790052	0.566666	1.41835	0.372014	0.81797	0.00545332	-2.75274	0.00121996	-4.5075	1.09036e-06	-1.32226	0.309615	-2.40851	0.0302033	-4.99665	1.37406e-06	-2.50122	0.00449094	-4.19634	4.31907e-06	-4.04898	6.88309e-05	-2.14618	0.0654649	-3.19856	0.00652314	-3.5783	0.0185996	-3.57071
serine	0.129885	0.741318	0.350598	0.45032	0.652574	0.696003	0.225711	0.521406	0.849227	0.0199277	0.239152	0.823517	-2.12546	6.37616e-06	-1.88755	0.00012845	-0.251594	0.761134	-2.02964	0.000150711	-1.38892	0.000156215	-0.665016	0.162283	-1.42206	0.000104964	-1.83763	6.28959e-05	-3.26925	0.000892335	-1.56584	0.000145082	-1.7607	7.64626e-05	-2.89035	2.59018e-06	-3.54753	9.96095e-08	-3.72518	4.21193e-07	-3.52085	1.5965e-05	-3.59548	4.14604e-07	-3.14962	4.95315e-08	-3.55536	1.42715e-05	-0.415566
homoserine lactone	1.24269	0.193735	1.09285	0.171416	0.127558	0.793437	2.14443	0.0735862	2.56326	0.00374752	-0.30645	0.84293	-0.228522	0.482567	-1.58755	0.00348008	1.54786	0.117351	0.673218	0.285685	-0.117145	0.81706	1.11385	0.025002	-2.79886	3.13969e-05	-2.53326	0.000342278	-4.12082	6.72131e-07	-1.01954	0.0484527	-0.903787	0.00304452	-3.45663	4.15915e-07	-3.02739	1.88585e-06	-4.12082	8.48717e-09	-2.57295	0.00222356	-0.346326	0.346634	-1.02093	0.0424705	-2.34278	0.000201697	0.2656
glycine	-0.12949	0.851448	0.116159	0.914297	0.599662	0.696003	-0.222298	0.521406	0.1876	0.467139	0.0101586	0.990811	-2.15697	2.0823e-05	-1.30291	0.00231169	-0.2118	0.770544	-2.24978	0.000441996	-1.23147	0.00104136	-0.801303	0.0178156	-1.076	0.000452534	-1.61445	0.000374501	-2.61596	0.00152696	-1.36565	0.00170333	-1.65845	0.000259143	-2.17645	2.2337e-06	-3.23297	1.65233e-08	-2.91736	9.36584e-08	-2.82776	8.44274e-06	-3.61543	7.46426e-07	-2.88992	7.12098e-08	-2.97775	3.84189e-06	-0.538449
homoserine	0.554116	0.606539	0.155466	0.959514	-0.126138	0.92063	0.564185	0.521406	1.2369	0.000611284	0.419836	0.680647	-2.07703	0.00176977	-2.22004	0.000136764	-0.471739	0.541316	-2.06697	0.00774142	-1.1386	0.105276	0.0742359	0.900502	-2.20301	0.00155164	-2.12014	0.000330631	-3.22359	0.000466911	-2.32714	0.000266132	-2.64291	0.00288113	-4.02796	1.15252e-05	-4.28005	3.83196e-08	-4.34018	4.12747e-08	-3.69533	2.70454e-05	-4.3941	1.26667e-05	-3.78151	4.95315e-08	-3.95373	9.37122e-06	0.0828749
threonine	0.499397	0.0818187	0.55508	0.399688	1.13296	0.522421	0.806311	0.0989737	1.7625	0.0004043	0.983895	0.583055	-2.17365	6.37616e-06	-2.89814	6.33317e-05	-1.81416	0.0874112	-1.86674	0.00021626	-1.69072	3.31858e-05	-1.96323	0.00952427	-1.99173	2.82085e-06	-1.69562	0.000521349	-2.61707	0.00111816	-1.40007	6.99744e-06	-1.04828	0.000229079	-1.39185	0.000124656	-4.16538	3.25598e-09	-4.59376	2.42845e-08	-4.43123	1.56679e-05	-3.26681	8.8973e-07	-2.739	4.98246e-09	-3.35507	0.000135654	0.296107
phosphothreonine	-0.602844	0.447716	0.180167	0.884324	-0.982492	0.696003	-0.114093	0.90034	0.0238451	0.959341	0.251374	0.845615	-1.27923	0.0347946	-1.90745	0.00219087	-1.06911	0.330482	-0.790483	0.237814	-2.06377	0.000170448	0.164751	0.812506	-2.17779	0.000116442	-1.96616	0.0013443	-2.76528	0.00783045	-0.828542	0.0418646	0.166097	0.486865	-1.79568	0.000579348	-3.45702	3.17136e-05	-3.87361	3.29848e-08	-3.83439	8.95911e-07	-1.61902	0.0111594	-1.89767	0.000167622	-1.63093	0.0164857	0.211627
betaine	0.293208	0.606539	0.420713	0.562021	0.383084	0.696003	0.0862393	0.788031	0.348389	0.108977	-0.055192	0.903086	-0.178278	0.45554	-0.14763	0.552165	0.374282	0.357518	-0.385247	0.246067	-0.219953	0.421299	-0.0639942	0.815995	-2.19795	3.13969e-05	-2.18324	2.77158e-05	-2.718	6.24115e-05	-2.04227	4.03275e-05	-1.90005	0.000138974	-2.47244	8.97968e-07	-2.37623	3.20404e-08	-2.33087	7.28883e-08	-2.34372	3.8698e-07	-2.42751	2.51874e-06	-2.12	4.02187e-08	-2.53644	1.68818e-06	0.014715
N-acetylglycine	0.416755	0.41334	0.136033	0.89204	0.739395	0.696003	0.814406	0.23651	0.926555	0.0387085	0.392398	0.641474	-1.58739	6.78299e-05	-1.38111	0.00456507	-1.16129	0.132178	-1.18974	0.019428	-0.590584	0.0613947	-1.50829	0.00282094	-0.854965	0.000164572	-1.32985	0.00133319	-1.22891	0.0143901	-2.34956	7.56741e-05	-3.10517	1.25054e-05	-2.40086	5.6734e-06	-2.44236	1.03199e-06	-2.71096	3.18755e-06	-2.3902	9.61507e-05	-3.53931	6.33238e-06	-3.69576	9.41148e-08	-3.90915	2.69891e-06	-0.474887
N-acetylthreonine	0.842391	0.269005	0.363052	0.707041	0.754652	0.696003	0.554973	0.384306	0.690628	0.00108765	0.358324	0.652101	-1.63459	0.000699232	-2.00059	7.9944e-07	-0.900291	0.153873	-1.92201	0.00244832	-1.67301	0.00727171	-1.29662	0.0199633	-3.37843	2.25384e-05	-2.67806	8.4e-07	-3.10704	0.000313018	-2.5051	7.15266e-05	-2.28407	0.00120723	-2.32145	1.35344e-06	-5.01302	1.45688e-09	-4.67865	2.89247e-09	-4.00733	2.57511e-07	-4.42711	1.03195e-06	-3.95708	2.08083e-09	-3.61807	1.98881e-05	0.700369
N-acetylserine	0.290489	0.520805	-0.103748	0.800231	0.0853019	0.881063	-0.0585111	0.85862	0.432547	0.0699424	0.0417042	0.983163	-1.49518	9.05592e-05	-1.88379	1.88057e-05	-1.31673	0.0368575	-1.84418	0.000336258	-1.34749	6.92091e-05	-1.36033	0.00228589	-2.35738	7.51405e-06	-1.93552	3.63397e-06	-2.04961	0.000193653	-2.08687	2.33725e-05	-2.05924	7.49442e-06	-1.98429	5.8744e-07	-3.85256	8.91617e-09	-3.81931	3.29848e-08	-3.36634	3.4711e-06	-3.93105	1.93595e-07	-3.40674	2.88162e-09	-3.34462	3.64795e-06	0.421864
2-methylserine	1.07177	0.457994	0.177563	0.93632	-0.744636	0.696003	-0.085903	0.521406	-0.235335	0.475241	1.12347e-15	0.641474	0.085903	0.383678	-0.024635	0.953464	-0.744636	0.436492	-1.07177	0.229784	-0.437533	0.408512	1.12347e-15	0.419685	-4.76629	1.76188e-07	-4.50632	5.43349e-06	-4.02165	0.00164852	-2.858	0.0644519	-3.49223	0.0223928	-3.92977	0.00650976	-4.68038	2.68086e-08	-4.53095	2.40176e-07	-4.76629	3.30964e-08	-3.92977	0.00590905	-3.92977	0.00609215	-3.92977	0.0062803	0.25997
dihydroxyacetone phosphate (DHAP)	-2.09654	0.269005	0.628543	0.77033	1.9984e-15	0.696003	2.49813	0.508179	1.27701	0.501799	1.66062	0.645951	-3.09888	0.00106471	-0.275182	0.390824	0.0206303	0.538758	1.49579	0.455551	0.37328	0.842859	1.68125	0.419685	1.40851	0.0950875	-1.48708	0.0278402	-1.76226	0.0128146	-1.21567	0.201035	-1.38618	0.191088	-2.28991	0.000214801	-1.69037	0.00528581	-1.76226	0.00408272	-1.74163	0.00470837	0.280112	0.869195	-1.0129	0.486525	-0.608661	0.766383	-2.89559
glucose	-0.0270756	0.99316	-0.190417	0.944799	-0.979718	0.696003	0.25319	0.58548	1.62271	0.0555514	-0.34716	0.777474	0.560331	0.47214	-1.53348	0.00560698	2.45761	0.0332738	0.840596	0.43379	0.279645	0.727052	3.09017	0.0015838	5.00542	0.000229236	5.11866	1.29694e-06	1.65703	0.0119478	4.3493	0.00263778	4.29919	0.0002949	0.0482616	0.938236	5.56576	9.28971e-08	3.58518	8.63842e-06	4.11463	3.36035e-05	5.1899	1.9687e-07	4.57884	5.523e-06	3.13843	2.5517e-05	0.113231
glucose 6-phosphate	1.43267	0.735249	2.94541	0.0690523	0	NA	1.78214	0.508179	3.9125	0.142918	0.935579	0.828432	2.07779	0.19733	-0.186587	0.794011	1.17975	0.410542	2.42726	0.292087	0.780508	0.67701	2.11533	0.334677	3.04954	0.0499066	0.673054	0.142643	0	NA	4.48221	0.0253428	3.61846	0.00108761	5.61733e-16	0.39237	5.12733	4.5538e-06	0.486466	0.373574	1.17975	0.197002	6.90948	0.000220634	4.39897	0.0190569	2.11533	0.268752	-2.37649
3-phosphoglycerate	0.149547	0.920954	1.17451	0.311375	0.231702	0.92756	0.645535	0.636509	2.22154	0.148463	0.458387	0.890394	-1.26537	0.0129578	-1.38936	0.0169812	2.10376	0.248206	-0.769383	0.473345	-0.342323	0.762224	2.33045	0.192498	1.91524	0.00608794	0.677994	0.178253	-2.85503	0.0449009	0.68775	0.35504	0.475462	0.588832	-4.00037	0.000423607	0.64987	0.208439	-0.711365	0.255724	-0.75127	0.337578	-0.0816333	0.936114	0.133139	0.900754	-1.66992	0.300724	-1.23725
glucose 1-phosphate	1.63453	0.612559	1.72704	0.279199	6.66134e-16	0.696003	1.63725	0.508179	3.71978	0.0295578	0.56098	0.871766	2.12235	0.137304	0.202824	0.536935	1.23162	0.218133	2.12507	0.296068	2.19556	0.125067	1.7926	0.282122	1.66628	0.20409	-0.0534447	0.740074	-0.125295	0.45287	2.9367	0.0776267	1.30949	0.183702	-0.489402	0.154921	3.78863	2.20672e-06	0.149379	0.652163	1.10632	0.101815	5.06177	0.00113478	3.50505	0.0060923	1.30319	0.385594	-1.71973
phosphoenolpyruvate (PEP)	0.210274	0.843816	1.23861	0.224408	0.253741	0.91209	0.536252	0.681227	2.34263	0.110617	0.446578	0.886161	-1.3395	0.00648518	-1.81891	0.00438992	1.71965	0.288685	-1.01353	0.361942	-0.714887	0.48118	1.91248	0.256981	1.88476	0.00517417	0.788825	0.116703	-2.53709	0.0425216	0.889097	0.168759	0.8215	0.276388	-3.48929	0.000508648	0.545254	0.271458	-1.03008	0.108465	-0.817445	0.285288	-0.12443	0.893983	0.106613	0.910728	-1.5768	0.290279	-1.09593
glycerate	-0.555465	0.204998	-0.334161	0.685246	0.138186	0.916678	0.453007	0.723582	0.788233	0.428348	-0.254534	0.880264	-3.7043	8.33857e-06	-3.67411	7.8551e-06	-1.3251	0.18768	-2.69583	0.0175765	-2.55172	0.00623036	-1.71782	0.0482611	-1.16794	0.000303752	-0.773957	0.0317633	-2.36862	0.00761806	-1.38849	0.00024835	-0.773202	0.0156253	-1.89552	1.41784e-07	-4.87225	2.86461e-07	-4.44807	1.89619e-08	-3.69372	5.39398e-06	-4.08432	0.000964795	-3.32492	0.00047488	-3.61334	0.000613867	0.393986
pyruvate	-0.709898	0.259745	0.386723	0.885606	-0.478236	0.811167	0.132159	0.87169	0.846307	0.00488685	0.805563	0.585781	-1.7804	0.000288549	-1.63841	0.00586549	-0.908134	0.404097	-0.938341	0.187564	-1.17883	0.207804	0.375665	0.475044	-2.01637	0.000858291	-1.77848	0.00979045	-2.17075	0.0185296	-2.91478	0.00031369	-1.58027	0.122294	-2.8375	0.000221856	-3.79677	6.88868e-06	-3.41689	8.32885e-06	-3.07888	0.000271838	-3.85312	0.000293446	-2.7591	7.43875e-05	-2.46183	0.0016852	0.237894
lactate	-0.9497	0.0355813	-0.168927	0.914297	-0.0687016	0.954045	0.488795	0.700927	0.645686	0.467139	0.691089	0.641474	-0.387291	0.397112	-0.166216	0.746729	-0.196828	0.775918	1.0512	0.255245	0.648396	0.251801	0.562962	0.419685	-2.62489	0.000215557	-2.0376	0.00164015	-2.71608	0.00254084	-4.83518	2.33072e-05	-3.46712	0.000592988	-4.04538	4.68707e-05	-3.01218	0.000334867	-2.20381	0.00284006	-2.91291	0.000214988	-3.78398	0.00215284	-2.81872	0.000576685	-3.48241	0.000688334	0.58729
Isobar: hexose diphosphates	-5.61733e-16	0.606539	0.165479	0.959514	2.01983	0.137037	2.71733	0.521406	2.21633	0.501799	1.61458	0.76916	0.191692	0.383678	-0.409473	0.390824	-0.00853242	0.990472	2.90902	0.292087	1.64138	0.495036	-0.413787	0.881773	5.61733e-16	0.389019	0.409473	0.387957	0.521805	0.247908	-0.507423	0.119324	0.0675296	0.936385	2.03422	0.00162305	0.191692	0.362714	5.61733e-16	0.373574	0.513273	0.371987	2.4016	0.322526	1.70891	0.425074	1.62043	0.519147	0.409473
4-guanidinobutanoate	0.283636	0.606539	-0.097198	0.904351	0.597953	0.736148	0.347909	0.738805	0.728244	0.362854	0.364389	0.826377	-2.01155	0.00189362	-1.37766	0.0091186	-0.687129	0.58761	-1.94728	0.0196917	-0.55222	0.209188	-0.920693	0.0796764	-1.99091	5.32562e-05	-1.63907	0.00018989	-2.69632	0.00456894	-1.62628	0.000208463	-1.65527	5.18848e-05	-2.01738	2.90413e-06	-4.00246	8.69628e-06	-3.01673	2.70077e-05	-3.38345	0.000855668	-3.57356	0.000284804	-2.20749	0.000226265	-2.93807	7.82703e-05	0.351842
5-aminolevulinate	-0.912543	0.437265	-1.23524	0.497292	-0.382109	0.893036	-1.18856	0.173123	0.0411208	0.962346	-1.38939	0.16229	-1.97997	0.000606649	-2.46854	0.00546711	0.0844268	0.955995	-2.25599	0.0126496	-1.19218	0.167479	-0.922854	0.186474	-1.88369	0.000293851	-3.22008	0.000390698	-6.74277	0.00103538	-2.03289	0.00560689	-3.69199	0.00108761	-6.36154	2.37064e-06	-3.86366	9.28971e-08	-5.68862	4.55536e-07	-6.65834	1.93887e-08	-4.28889	1.01653e-05	-4.88416	1.17666e-06	-7.2844	2.30759e-07	-1.33639
protoporphyrin IX	-0.489279	0.462668	0.317446	0.800231	0.486144	0.825287	-0.33721	0.521406	5.61733e-16	0.501799	-0.148966	0.641474	-0.152069	0.768239	-0.263572	0.390824	-0.194835	0.699547	5.61733e-16	0.410238	-0.581018	0.238435	-0.829945	0.236672	-2.27209	0.00239774	-2.4978	0.00112018	-2.41757	0.00405595	-2.38326	0.010089	-1.80224	0.0670426	-1.55331	0.119002	-2.42416	0.00148436	-2.76137	8.39898e-05	-2.6124	0.000241981	-2.38326	0.00770876	-2.38326	0.00791996	-2.38326	0.00827463	-0.225707
histidine	0.186408	0.828103	0.413254	0.685246	0.404105	0.835223	-0.517043	0.173123	0.180258	0.501799	-0.0158391	0.990811	-1.37372	0.00177425	-1.09389	0.000329357	-0.0572925	0.948746	-2.07717	0.000441996	-1.32688	0.0257504	-0.477236	0.40834	-2.40123	8.13904e-05	-2.89418	2.01464e-06	-4.24845	0.00061018	-2.29559	8.96478e-05	-2.5617	0.000764472	-3.92512	4.11057e-07	-3.77495	4.27726e-08	-3.98807	2.65004e-08	-4.30574	8.34831e-08	-4.37276	4.80685e-08	-3.88858	4.95315e-08	-4.40236	1.06607e-05	-0.492952
imidazole propionate	1.12243	0.543905	0.2255	0.959514	-3.33067e-16	0.696003	-1.01044	0.521406	-0.399156	0.806574	-0.247741	0.641474	1.59797	0.0841656	0.602544	0.629438	0.247741	0.538758	-0.534896	0.637748	-0.0221116	0.980819	-2.80867e-16	0.419685	-0.164217	0.864351	0.0567169	0.962917	-0.645865	0.45287	1.11568	0.277872	0.439693	0.653054	-0.488389	0.39237	1.43375	0.142998	0.659261	0.566508	-0.398123	0.603006	0.580788	0.522083	0.417581	0.614885	-0.488389	0.387243	0.220934
1-methylhistidine	-0.422294	0.851448	-1.00215	0.516299	-0.243675	0.863408	-5.61733e-16	0.521406	-5.61733e-16	0.501799	-5.61733e-16	0.641474	-1.40002	0.0882318	-2.31132	1.93379e-05	-1.01553	0.0795471	-0.977729	0.226942	-1.30917	0.102656	-0.771852	0.145364	-3.82218	0.000785714	-2.91089	8.64776e-06	-4.20668	5.25004e-05	-2.33781	0.0115526	-2.00637	0.0253269	-2.54369	0.00075795	-5.22221	3.15907e-10	-5.22221	4.64569e-10	-5.22221	9.90866e-10	-3.31554	9.03082e-07	-3.31554	6.91422e-07	-3.31554	1.38422e-06	0.911296
homocarnosine	-0.159763	0.606539	0.100604	0.624693	0	NA	0	NA	0	NA	0.308936	0.641474	-0.159763	0.383678	0	NA	0	NA	0	NA	-0.100604	0.312526	0.308936	0.419685	-2.07057	5.75502e-05	-2.23033	4.38495e-06	-2.23033	3.41834e-05	-0.280857	0.199962	-0.180252	0.451037	-0.280857	0.190479	-2.23033	7.93927e-07	-2.23033	9.19701e-07	-2.23033	1.44797e-06	-0.280857	0.179697	-0.280857	0.184041	0.0280792	0.951095	-0.159763
histamine	-0.229841	0.462668	-0.222149	0.685246	-0.139873	0.696003	-5.61733e-16	0.521406	-5.61733e-16	0.501799	-5.61733e-16	0.641474	-0.229841	0.209699	-0.222149	0.390824	-0.139873	0.436492	-5.61733e-16	0.410238	-5.61733e-16	0.408512	-5.61733e-16	0.419685	-1.58512	0.00120645	-1.59281	0.00295605	-1.67509	0.00247587	-0.684448	0.0151906	-0.684448	0.0173527	-0.684448	0.0136768	-1.81496	0.000131446	-1.81496	0.000145072	-1.81496	0.000170571	-0.684448	0.0122139	-0.684448	0.0126761	-0.684448	0.0131829	-0.00769176
imidazole lactate	-0.682136	0.185974	-1.26068	0.0286501	-0.303032	0.779318	-0.785087	0.521406	-0.788977	0.0143946	-0.245611	0.680647	-1.96597	5.6361e-05	-0.923085	0.00037385	-0.299679	0.620847	-2.06892	0.0106623	-0.451377	0.125067	-0.242258	0.204583	-0.554897	0.0107375	0.420595	0.0198046	-0.101391	0.771232	-1.54022	0.000181282	-1.14328	0.000834123	-0.707613	0.0011677	-2.52086	6.80174e-07	-0.502491	0.000378923	-0.40107	0.204551	-3.60914	0.000155296	-1.59466	1.14533e-05	-0.949871	4.23642e-06	0.975492
N-acetylhistidine	0.0246133	0.991705	-0.267229	0.751766	0.114819	0.91209	-0.385366	0.521406	0.169053	0.45527	0.188098	0.871766	-2.11232	0.00012554	-2.17815	7.8551e-06	-0.602693	0.436492	-2.5223	0.000873833	-1.74187	0.00200518	-0.529415	0.318929	-2.05741	5.75502e-05	-0.850961	0.000437458	-1.93602	0.00256869	-1.74306	0.000318763	-0.82845	0.0463322	-1.53146	0.000237298	-4.16973	2.38222e-08	-3.02911	2.16432e-08	-2.53872	4.51079e-05	-4.26535	3.5918e-06	-2.57032	4.58833e-08	-2.06088	0.000553349	1.20645
3-methylhistidine	-0.931392	0.342074	0.0872977	0.959514	0.177693	0.945673	0.27491	0.521406	0	NA	-0.106477	0.986174	-3.57756	5.34585e-06	-5.02353	3.34932e-06	-2.21158	0.222345	-2.37126	0.00337928	-5.11083	3.15636e-06	-2.49575	0.0689259	-3.18262	1.28713e-05	-1.73665	0.000993419	-3.44234	0.017873	-2.72012	0.000439544	-0.255458	0.432935	-1.87076	0.000613879	-6.76018	2.00793e-11	-6.76018	2.0497e-11	-5.65392	6.56895e-06	-5.09138	6.2404e-07	-5.36629	3.25024e-10	-4.36651	0.00231138	1.44597
1-ribosyl-imidazoleacetate*	-0.203139	0.606539	-0.226433	0.884324	-1.67725	0.367187	0	NA	0	NA	0	NA	-0.203139	0.383678	-3.53785	9.37027e-06	-1.67725	0.0873849	0	NA	-3.31142	0.000240797	0	NA	-0.709664	0.170143	2.62505	0.00109129	0.764449	0.367073	-0.396013	0.392956	2.91541	0.00233	-0.396013	0.39237	-0.912803	0.0521344	-0.912803	0.0533274	-0.912803	0.0554275	-0.396013	0.361953	-0.396013	0.375707	-0.396013	0.387243	3.33472
1-methyl-5-imidazoleacetate	-1.74635	0.129714	-2.80966	0.00738056	-0.466573	0.825287	-5.61733e-16	0.521406	-5.61733e-16	0.501799	-5.61733e-16	0.641474	-1.74635	0.0183255	-3.35225	1.08111e-08	-2.51664	0.00439858	-5.61733e-16	0.410238	-0.542589	0.232013	-2.05007	0.00513287	1.22846	0.106376	2.83436	0.000104218	1.99875	0.0125564	5.61733e-16	0.392956	0.542589	0.229633	2.05007	0.00261305	-0.517892	0.162853	-0.517892	0.169536	-0.517892	0.170902	5.61733e-16	0.361953	5.61733e-16	0.375707	5.61733e-16	0.387243	1.6059
4-imidazoleacetate	-0.520074	0.288992	-1.06487	0.0297514	0.238481	0.835223	0.0739313	0.883232	-1.28154	0.00526303	-0.945819	0.289774	-3.27894	1.58328e-05	-2.65849	3.80279e-05	-2.39158	0.014343	-2.68493	0.000145199	-2.87516	2.4793e-06	-3.57588	6.14874e-06	-0.523527	0.0238249	1.11839	0.00109453	1.07689	0.0256256	-0.642938	0.018027	0.454178	0.00808897	1.71604	1.49779e-05	-3.80247	7.97911e-07	-1.54011	0.000109744	-1.31469	0.00519871	-3.32787	1.53577e-06	-2.42098	1.76203e-07	-1.85985	9.69659e-06	1.64191
formiminoglutamate	0.581848	0.606539	0.53777	0.709144	-0.17716	0.92063	-0.287136	0.834232	-0.450026	0.71205	-0.495048	0.784606	2.17992	0.0108736	1.02884	0.203282	0.89605	0.438052	1.31094	0.217842	0.041048	0.96301	0.578161	0.489667	-0.428044	0.389019	0.448825	0.519739	0.43284	0.607288	-2.08698	0.0151111	-1.25419	0.0299036	-1.9851	0.00479885	1.75188	0.0521463	1.47767	0.0613669	1.32889	0.10335	-0.776045	0.228816	-1.21314	0.106213	-1.40694	0.0438763	0.876868
inositol 1-phosphate (I1P)	0.0254037	0.99316	-0.580365	0.797946	-0.284493	0.91209	-0.523468	0.521406	-0.772104	0.386109	-0.270305	0.882436	-3.27889	0.000251561	-2.65212	0.00280766	-0.865145	0.536194	-3.82776	0.00036358	-2.84386	0.0171834	-0.850957	0.419685	3.01164	0.000228404	2.63351	0.000612213	1.03242	0.262932	2.95731	0.00273896	1.97341	0.0857338	0.668182	0.481839	-0.267244	0.633927	-0.0186074	0.977288	0.16727	0.832107	-0.870452	0.0531124	-0.870452	0.0537492	-0.182775	0.785241	-0.37813
myo-inositol	0.168664	0.872164	-0.0367135	0.963302	0.456819	0.696003	-0.246132	0.521406	0.0384051	0.885182	-0.193492	0.720793	-2.29384	0.000146898	-1.66225	3.83764e-05	-0.678911	0.301839	-2.70864	0.000405161	-1.58713	0.00073496	-1.32922	0.00108871	-2.65449	6.54987e-05	-2.96141	7.29449e-07	-3.72549	0.000214458	-2.34301	0.000439544	-2.85531	3.51338e-05	-3.12585	4.93871e-07	-4.94833	2.94555e-09	-4.62366	9.09732e-09	-4.4044	5.34871e-08	-5.05165	1.1644e-07	-4.44244	4.64392e-08	-4.45507	7.9698e-07	-0.306923
3-hydroxybutyrate (BHBA)	0.218765	0.606539	-0.423031	0.583332	-0.0633296	0.954896	0.491733	0.402049	0.557775	0.149515	0.144452	0.898762	-1.94159	1.97016e-06	-2.21613	0.000123015	-0.681266	0.436492	-1.66862	0.00204858	-1.23533	0.00575211	-0.473484	0.30041	-2.46151	4.54613e-06	-2.18697	0.000192795	-2.82365	0.0010213	-2.32889	6.07958e-05	-2.69615	2.43691e-05	-2.97313	1.28292e-06	-4.4031	2.02102e-09	-4.4031	2.89247e-09	-3.50491	2.35028e-05	-3.99752	2.73236e-06	-3.93147	1.35501e-06	-3.44661	2.87719e-05	0.274542
leucine	0.217633	0.259745	0.327189	0.399688	1.34429	0.414263	-0.419249	0.173123	0.562164	0.0821433	0.366825	0.641474	-1.3281	9.75795e-06	-1.51241	0.000476164	-0.420169	0.617159	-1.96498	3.51414e-05	-1.27744	1.93904e-05	-1.39763	0.000826144	-1.10255	2.56348e-06	-1.0982	0.000474903	-2.33736	0.00363414	-1.42025	6.99744e-06	-1.30634	1.94877e-06	-1.5284	2.07993e-06	-2.43066	4.2464e-08	-2.61062	7.06436e-07	-2.75753	3.8224e-05	-3.38523	4.01801e-08	-2.58378	2.11605e-08	-2.92603	2.14161e-06	0.00435156
isoleucine	-0.0843792	0.46707	0.125713	0.752447	1.0172	0.522421	-0.488647	0.127858	0.300273	0.217242	0.172906	0.790274	-1.07973	2.3935e-05	-1.19622	0.000709325	-0.343025	0.617159	-1.484	5.66821e-05	-1.02166	2.31958e-05	-1.18732	0.000380788	-0.871447	1.43273e-05	-0.874092	0.00120385	-1.80848	0.00580296	-0.578321	7.23105e-05	-0.370873	0.00105372	-0.413777	0.0036886	-1.95118	2.4854e-07	-2.07031	9.47864e-07	-2.1515	4.25012e-05	-2.06232	6.82599e-07	-1.39253	3.51403e-07	-1.60109	9.11712e-06	-0.00264465
valine	0.000174382	0.999463	0.0972629	0.959514	0.546585	0.696003	-0.269315	0.521406	0.441189	0.108595	0.198967	0.777474	-2.14963	2.16481e-05	-2.05763	0.000530089	-1.19963	0.0862351	-2.41912	0.000126555	-1.71371	0.000246273	-1.54725	0.00171049	-2.22881	0.000102528	-2.21507	0.000612213	-3.07499	0.000520768	-2.29279	3.33197e-05	-2.18196	3.51338e-05	-2.59256	2.29863e-06	-4.37844	9.96095e-08	-4.2727	2.02378e-07	-4.27462	1.22499e-06	-4.71191	4.70004e-08	-3.89566	1.68423e-08	-4.13981	8.105e-07	0.0137402
2,3-dihydroxy-3-methylvalerate	-0.634848	0.259745	-0.399472	0.64488	-0.300147	0.845738	0.0644538	0.521406	0.166036	0.666269	-0.556104	0.641474	-2.27464	8.79711e-06	-2.62642	2.26837e-06	-0.239416	0.775847	-1.57534	0.000546571	-2.06092	0.00230715	-0.495374	0.419685	0.205548	0.428544	0.626399	0.0201327	-0.617533	0.33374	-0.257427	0.521684	0.398799	0.423627	-0.745807	0.0537846	-2.06909	1.79502e-06	-2.00003	4.66533e-06	-0.856949	0.0304655	-1.83276	0.000388074	-1.66212	0.00294573	-1.24118	0.0553206	0.42085
N-acetylleucine	-0.827637	0.448029	-0.926083	0.0921598	0.406952	0.736148	-1.50148	0.0927802	-0.567443	0.141936	-0.61243	0.485764	-2.69144	2.63218e-05	-2.02189	0.000168759	-0.770912	0.344622	-3.36529	0.00132256	-1.66325	0.000284499	-1.79029	5.72117e-06	-1.7095	0.00190833	-1.70988	0.00208636	-2.40888	0.0037359	-3.23816	0.000393441	-3.33699	1.59457e-06	-2.70296	1.74095e-07	-4.40094	1.0028e-06	-3.73177	3.88468e-06	-3.17979	0.000109544	-6.60345	4.41483e-07	-5.00024	2.96528e-08	-4.49325	4.4939e-09	-0.00038119
5-methylnorleucine	0.0810728	0.939195	-0.139802	0.866059	0.662448	0.696003	0.0884169	0.836282	0.0855274	0.787776	0.00131178	0.997711	-0.616224	0.0534679	-0.938408	0.0110895	0.140546	0.85155	-0.60888	0.126067	-0.713079	0.0229943	-0.520589	0.177761	-1.19171	0.000623378	-1.00358	0.00625824	-1.85675	0.00465662	-1.57011	0.000877917	-1.60286	0.000136123	-1.65378	6.16578e-05	-1.80793	9.43264e-05	-1.94199	1.61846e-05	-1.71621	0.0015578	-2.17899	4.13582e-06	-2.31594	1.14616e-06	-2.17437	3.98743e-05	0.188122
N-acetylvaline	-0.636441	0.425035	-0.935685	0.171416	0.45511	0.768957	-0.0197573	0.951225	-0.3003	0.501799	-0.10948	0.880264	-2.97677	1.53883e-05	-2.63194	0.000186615	-1.57921	0.0823224	-2.36009	0.000746188	-1.99655	0.000178068	-2.1438	0.000114575	-2.11821	0.00124672	-1.95748	0.0028702	-2.67929	0.00469475	-2.50845	0.000124259	-2.64696	8.8613e-06	-1.97798	3.30269e-06	-5.09498	7.93927e-07	-4.58942	4.35245e-06	-4.2585	1.34822e-05	-4.86854	1.39426e-07	-4.64352	1.12163e-08	-4.12178	2.41641e-07	0.160731
N-acetylisoleucine	-1.69633	0.0341709	-1.05517	0.181818	0.0566373	0.964238	-0.714626	0.382784	-0.7461	0.08686	-0.363747	0.641474	-2.79785	6.71646e-05	-2.07192	0.000912284	-1.17433	0.227239	-1.81615	0.00307783	-1.76285	0.000827263	-1.59472	1.86699e-05	-2.01536	9.03764e-05	-2.03078	0.00117711	-2.42379	0.00455115	-1.89834	0.000648934	-1.2726	0.000652752	-0.5538	0.0018784	-4.81321	8.68594e-07	-4.1027	2.67164e-07	-3.59812	2.9131e-05	-3.71449	9.91264e-07	-3.03545	1.57067e-06	-2.14852	2.47011e-07	-0.0154165
methylsuccinate	-0.195355	0.904392	0.300181	0.77036	0.117364	0.863408	-0.418518	0.521406	0.00560554	0.994045	0.480417	0.641474	-0.218674	0.725696	-0.708542	0.0411926	-0.648894	0.115316	-0.441838	0.342197	-1.00312	0.0711866	-0.285841	0.491094	-1.07835	0.105592	-0.979271	0.0318259	-1.27508	0.0106317	-0.87971	0.0713389	-0.285095	0.578034	-0.763719	0.0549575	-1.29702	0.0116912	-1.68781	0.000792455	-1.92397	0.000644973	-1.32155	0.00501848	-1.28821	0.00850135	-1.04956	0.0312554	0.0990789
2-hydroxy-3-methylvalerate	-1.24658	0.000267302	-1.45992	0.119429	-0.686094	0.696003	0.128865	0.521406	-0.0484438	0.501799	-0.215991	0.863573	-3.83714	6.37306e-09	-4.54563	2.16475e-05	-3.19087	0.0156896	-2.4617	1.3248e-05	-3.13415	3.53425e-06	-2.72076	0.00082018	-1.23581	4.33849e-05	-0.478878	0.306005	-1.27408	0.091672	-1.31688	2.09043e-05	-0.773288	0.00828746	-0.794661	0.00118908	-5.07295	2.9621e-10	-5.0245	8.25008e-10	-4.46494	1.29696e-06	-3.77857	1.32365e-07	-3.90744	3.85474e-09	-3.51542	6.30506e-05	0.75693
alpha-hydroxyisocaproate	-2.11875	0.0142575	-1.88987	0.0345385	-0.960559	0.696003	0.0889891	0.521406	2.80867e-16	0.501799	-0.357663	0.680647	-3.88792	1.92208e-06	-4.44018	1.23711e-05	-3.34054	0.0167218	-1.68018	0.00104311	-2.55031	5.16105e-06	-2.73764	0.000168204	-0.696015	0.0182092	-0.14375	0.713977	-0.723938	0.288489	-3.35472	2.09043e-05	-2.57358	7.31687e-06	-2.22445	9.97175e-05	-4.58393	7.85152e-11	-4.58393	1.03849e-10	-4.06448	1.30242e-05	-5.0349	7.77276e-09	-5.12389	5.79262e-10	-4.96209	8.23375e-08	0.552265
isobutyrylglycine (C4)	-0.215404	0.616726	-0.321335	0.807096	0.515777	0.696003	0	NA	0.131848	0.514837	0	NA	-0.222618	0.383678	-0.557003	0.289851	-0.262131	0.436492	-0.00721317	0.410238	-0.10382	0.762224	-0.777908	0.0897631	0.222618	0.389019	0.560462	0.266315	0.262131	0.339103	0.00721317	0.392956	0.239127	0.419479	0.777908	0.0601275	0	NA	0.00345942	0.373574	0	NA	0	NA	0.135307	0.375707	0	NA	0.337844
3-hydroxyisobutyrate	0.120333	0.606539	0	NA	-0.0803893	0.696003	0	NA	0	NA	0	NA	0	NA	0	NA	-0.0803893	0.436492	-0.120333	0.410238	0	NA	0	NA	-0.282937	0.389019	-0.282937	0.387957	-0.202548	0.601228	0.120333	0.392956	0	NA	0	NA	-0.282937	0.362714	-0.282937	0.373574	-0.282937	0.371987	0	NA	0	NA	0	NA	0
beta-hydroxyisovalerate	-0.0323105	0.980205	-0.13283	0.838006	0.13205	0.863408	-0.131509	0.521406	0.0130151	0.96896	-0.0699235	0.871766	-0.104451	0.635466	-0.300557	0.203729	-0.280407	0.340734	-0.203649	0.410238	-0.154712	0.531157	-0.48238	0.16119	0.105131	0.631107	0.466896	0.0287697	0.473013	0.0534413	0.00364277	0.989035	0.264889	0.259756	0.535885	0.055343	0.000680248	0.9947	0.16634	0.241666	0.192606	0.0385235	-0.200006	0.110567	0.110177	0.537452	0.0535049	0.808191	0.361765
alpha-hydroxyisovalerate	-1.02551	0.0675666	-0.901072	0.282483	0.0529849	0.965047	0.457782	0.521406	0.102282	0.830457	0.593207	0.583055	-2.30692	6.18726e-05	-1.97839	0.00156114	-2.20783	0.0368575	-0.823624	0.125314	-0.975035	0.0312938	-1.66761	0.00188042	-1.68656	5.62353e-05	-1.09906	0.0232767	-1.24529	0.0424344	-2.87797	2.09043e-05	-2.16603	4.63678e-05	-1.3582	0.000640906	-3.99348	3.86281e-07	-3.07745	3.87484e-07	-3.45312	1.60129e-05	-3.70159	1.40471e-05	-3.14107	8.55935e-06	-3.02581	3.84189e-06	0.587493
isovalerylglycine	0.177029	0.947445	-0.203919	0.963302	2.57648	0.275176	-0.263143	0.521406	-0.423609	0.737587	0.0462115	0.986174	-0.141734	0.792805	-0.00383321	0.997381	-0.504317	0.698947	-0.581907	0.410238	-0.223523	0.849794	-3.03459	0.00085551	0.00413513	0.994785	0.565593	0.636218	0.481517	0.645314	0.0699199	0.937268	0.250429	0.850539	2.94675	0.00122786	-0.137599	0.794639	0.561759	0.477176	-0.0227999	0.971584	-0.511987	0.361953	0.0269059	0.979239	-0.0878328	0.915013	0.561457
isobutyrylcarnitine (C4)	0.236986	0.606539	-0.825311	0.348001	-0.746013	0.696003	-0.0512888	0.950024	-0.224404	0.501799	0.284624	0.777474	0.704329	0.134852	-0.65695	0.235887	-0.501695	0.62465	0.416054	0.457844	-0.056044	0.408512	0.528942	0.23691	0	NA	0.881355	0.0709635	0.746013	0.339103	0.236986	0.392956	0.056044	0.419479	0	NA	0.704329	0.109683	0.224404	0.373574	0.244318	0.371987	0.653041	0.170642	0	NA	0.528942	0.183175	0.881355
3-methyl-2-oxovalerate	-0.478529	0.461991	-3.75843	0.0947258	-3.58901	0.037523	0.754889	0.508179	-1.16308	0.264869	-0.31667	0.845615	-0.608775	0.0837747	-2.54883	0.0583727	-4.88252	0.00278936	0.624643	0.320557	0.0465274	0.949978	-1.61018	0.0474912	-0.0231933	0.95766	4.21849	0.00368914	7.17234	1.30324e-05	-1.62122	0.000124259	-0.659438	0.243535	2.46382	0.000876031	-0.631968	0.0351523	1.66967	0.0184235	2.28981	0.00613979	-0.996581	0.0890519	-0.612911	0.157383	0.853643	0.0904929	4.24169
3-methyl-2-oxobutyrate	-0.220297	0.725397	-3.20092	0.131258	-4.18926	0.037523	0.491069	0.521406	-0.484799	0.482826	-0.436388	0.788903	-0.34513	0.277056	-3.997	0.00735969	-6.29985	0.000858141	0.366235	0.429576	-1.28088	0.0120015	-2.54698	0.0155677	-1.18923	0.00491587	3.16226	0.0162446	6.03039	2.52209e-05	-2.40512	4.14864e-05	-1.03425	0.0233523	0.845543	0.144238	-1.53436	2.15709e-06	-0.834734	0.0429147	-0.269458	0.578415	-2.03889	0.0016226	-2.31513	6.08188e-05	-1.70144	0.0197273	4.3515
4-methyl-2-oxopentanoate	-0.950427	0.269005	-3.12335	0.161806	-3.09381	0.114394	0.493368	0.508179	-0.20402	0.817269	-0.245967	0.883494	-0.950427	0.0719342	-2.88781	0.0344051	-5.19209	0.00236795	0.493368	0.227255	0.0315159	0.96301	-2.34425	0.022114	0.950427	0.0649061	3.80472	0.00597607	6.92254	1.30324e-05	-1.12422	0.0115502	-0.442851	0.492068	2.70451	0.00194484	1.40433e-16	0.362714	0.916908	0.0558498	1.73046	0.00848106	-0.630855	0.209844	-0.411335	0.44279	0.360265	0.607682	2.85429
isovalerate (C5)	-0.37482	0.891224	-1.19532	0.838006	1.73261	0.696003	-1.03514	0.521406	-0.986088	0.501799	0.0967901	0.986174	-0.144785	0.813248	-0.480377	0.78795	-2.84185	0.268673	-0.805107	0.529339	-0.271148	0.886473	-4.47767	0.00294204	1.76552	0.000548488	3.68387	0.057529	5.88751	0.00651691	1.3907	0.227263	2.48855	0.135278	7.62013	1.59526e-08	1.62073	0.012124	3.2035	3.34758e-06	3.04567	0.00865336	0.585589	0.311804	2.21741	0.0232828	3.14246	0.00808685	1.91836
palmitoleate (16:1n7)	-0.730963	0.457994	-0.128148	0.959514	0.0293163	0.99045	-1.93954	0.0925735	-1.43511	0.0312149	-0.86236	0.417153	-2.14995	0.00121947	-0.521584	0.20107	-0.333496	0.757239	-3.35853	0.000887048	-1.82854	0.027643	-1.22517	0.136537	2.93735	0.000763025	1.53172	0.0224744	1.04324	0.292915	2.35737	0.0147888	1.55455	0.114293	1.22354	0.190479	0.7874	0.136324	1.01013	0.0475363	0.709741	0.183628	-1.00115	0.224549	-0.273988	0.714857	-0.00163604	0.998105	-1.40564
oleate/vaccenate (18:1)	-0.371261	0.768642	0.053485	0.981268	0.648078	0.835223	-1.19323	0.158987	-0.890333	0.347025	-1.37226	0.358319	-2.08967	0.00443488	-1.49405	0.0356468	0.45346	0.683841	-2.91164	0.000873833	-2.43786	0.0196649	-1.56688	0.154351	1.34176	0.0671268	0.991664	0.156166	0.0378646	0.971718	1.44668	0.107238	1.52134	0.159933	1.16213	0.253463	-0.747909	0.212315	-0.502382	0.43154	0.491325	0.381743	-1.46495	0.0662321	-0.916527	0.264713	-0.40475	0.668214	-0.350094
10-heptadecenoate (17:1n7)	-0.438975	0.642858	0.371354	0.821624	0.391513	0.854686	-0.635313	0.326337	-0.374318	0.447159	-0.65998	0.358319	-1.55642	0.00848979	-1.00198	0.0278229	0.116535	0.88134	-1.75275	0.00526186	-1.74765	0.0281032	-0.934958	0.168098	1.29173	0.0373656	0.737768	0.167558	0.170826	0.80372	0.462032	0.522936	0.718402	0.424883	0.171618	0.849551	-0.264689	0.521614	-0.26421	0.496926	0.28736	0.490858	-1.29072	0.0639069	-1.02925	0.136984	-0.76334	0.261532	-0.553959
eicosenoate (20:1n9 or 1n11)	-0.129257	0.947445	0.107827	0.963302	0.233666	0.91209	-0.840944	0.165601	-0.677602	0.240586	-1.2039	0.267954	-1.94875	0.00248391	-1.36593	0.0214851	-0.444791	0.639485	-2.66044	0.00116503	-2.15136	0.0130485	-1.88236	0.0450855	0.29176	0.655106	-0.490745	0.432775	-0.600379	0.495982	0.609195	0.411885	0.0637744	0.944435	0.0799795	0.938236	-1.65699	0.0103891	-1.85667	0.00772412	-1.04517	0.0886715	-2.05125	0.00663031	-2.08758	0.00691132	-1.80238	0.0227384	-0.782505
10-nonadecenoate (19:1n9)	0.360586	0.78689	0.508399	0.838006	0.189449	0.916678	-0.0638203	0.894104	0.300415	0.501799	-0.688355	0.462829	-1.26948	0.0527177	-1.28003	0.070929	-0.513446	0.515605	-1.69388	0.00636214	-1.48801	0.11853	-1.39125	0.086344	0.294078	0.725721	0.00963714	0.991889	-0.0685877	0.937964	-0.114905	0.882798	-0.251533	0.844439	-0.648709	0.502495	-0.975397	0.129094	-1.27039	0.0503518	-0.582034	0.400482	-1.80879	0.0282146	-1.73954	0.0400616	-2.03996	0.0126896	-0.284441
erucate (22:1n9)	0.0580122	0.851448	0.0381007	0.959514	0.241247	0.81063	-0.189287	0.460219	-0.0340983	0.865601	-0.450354	0.16229	-0.0834433	0.51428	-0.135135	0.318345	0.141566	0.613332	-0.330743	0.0429147	-0.207334	0.31466	-0.550035	0.0932135	-0.320008	0.126632	-0.340988	0.0770777	-0.205341	0.463525	-0.2821	0.0824572	-0.322992	0.15613	0.015801	0.958693	-0.403451	0.0283208	-0.476124	0.0246608	-0.0637756	0.696595	-0.612843	0.00348547	-0.530327	0.00517033	-0.534234	0.0100667	-0.0209807
hexadecatrienoate (16:3n3)	-0.786924	0.445503	-0.0855565	0.980611	0.281596	0.894704	-1.59075	0.0735862	-1.75619	0.000142155	0.270966	0.82479	-5.22198	1.74808e-05	-2.40128	0.00603357	-3.57455	0.0176509	-6.0258	2.37291e-05	-4.07191	0.00454713	-3.58518	0.00197107	4.78616	5.52482e-05	1.81016	0.0353782	1.6612	0.104035	3.81689	0.00350638	1.54226	0.283421	1.76046	0.106078	-0.43582	0.362714	-0.591121	0.173539	-1.91335	0.00333429	-2.20891	0.0307225	-2.52965	0.0145412	-1.82472	0.0919006	-2.976
hexadecadienoate (16:2n6)	-0.953565	0.384128	-0.241611	0.939454	-0.000241967	0.999796	-2.74583	0.0892095	-1.75423	0.0163792	-0.412815	0.777474	-3.84917	6.4271e-05	-1.60653	0.0049223	-2.3708	0.0912056	-5.64143	0.000332317	-3.11914	0.00657459	-2.78337	0.0112784	3.84166	0.000209662	1.46826	0.0278402	1.06388	0.299326	2.10608	0.038664	0.444646	0.714689	0.281629	0.791308	-0.00751031	0.989021	-0.138263	0.760142	-1.30692	0.042018	-3.53535	0.00617851	-2.6745	0.00977213	-2.50174	0.0242439	-2.37339
linolenate (18:3n3 or 3n6)	-0.273278	0.851448	0.424609	0.806966	0.85364	0.783218	-1.57868	0.330324	-0.720349	0.344289	-0.248338	0.871766	-4.45463	0.000105843	-2.39466	0.00100179	-2.20663	0.0873849	-5.76002	0.000365955	-3.53962	0.00243299	-3.3086	0.00843401	4.12298	0.000367103	2.17006	0.00963989	1.57648	0.146446	3.18821	0.00894332	1.93317	0.0963759	1.76863	0.10732	-0.331643	0.582605	-0.224596	0.673008	-0.630144	0.276361	-2.57182	0.0327119	-1.60644	0.101839	-1.53998	0.159781	-1.95292
linoleate (18:2n6)	-0.55178	0.606539	0.100839	0.963302	0.485138	0.863408	-1.75239	0.117048	-1.07208	0.149515	-0.989096	0.440353	-3.25232	0.000351406	-2.26459	0.0015064	-1.28042	0.268821	-4.45293	0.000276357	-3.43751	0.00146429	-2.75465	0.0110235	2.1523	0.0117385	1.21693	0.111603	0.523589	0.6116	1.53972	0.126348	1.25697	0.236123	0.947923	0.37782	-1.10001	0.114371	-1.04766	0.0992798	-0.756831	0.239185	-2.91321	0.00978922	-2.18054	0.0362248	-1.80673	0.0777165	-0.935371
dihomolinoleate (20:2n6)	-0.331807	0.78689	0.0349443	0.985742	0.477704	0.863408	-0.352704	0.521406	-0.0968663	0.904322	-0.861462	0.641474	-3.28543	0.00047839	-2.91193	0.000960462	-1.29378	0.383393	-3.30633	0.000192539	-3.04374	0.00305504	-2.63295	0.0161867	0.468096	0.423162	0.137876	0.800298	-0.682175	0.489847	0.137983	0.850416	0.174515	0.863319	-0.202776	0.848401	-2.81734	0.000671493	-2.77406	0.000928907	-1.97596	0.0156072	-3.16835	0.000421975	-2.86923	0.00195825	-2.83572	0.00248879	-0.33022
dihomolinolenate (20:3n3 or 3n6)	0.133053	0.927803	0.224398	0.89204	0.597027	0.732273	-0.151547	0.521406	-0.0996091	0.73394	-0.11061	0.822738	-1.83324	0.00115495	-1.43275	0.00314879	-0.618155	0.212169	-2.11784	0.000838364	-1.75675	0.01098	-1.32579	0.0490092	0.689787	0.156786	0.273909	0.516748	-0.287782	0.545348	0.669185	0.298324	0.344652	0.658278	0.15559	0.848401	-1.14345	0.00442625	-1.15884	0.00603188	-0.905937	0.0164518	-1.44866	0.0171757	-1.4121	0.0199719	-1.1702	0.0503429	-0.415878
tetradecadienoate (14:2)*	0.177486	0.936802	0.769336	0.704225	1.64088	0.696003	-0.488289	0.508179	-0.35593	0.713511	-0.13507	0.922845	-0.54152	0.349867	-0.848896	0.304429	-3.03397	0.132874	-1.2073	0.0767815	-1.97416	0.0612045	-4.80991	7.71844e-05	0.461362	0.364903	1.14341	0.0705004	3.28537	0.0419723	-0.156271	0.888785	1.11763	0.414663	4.13113	0.002367	-0.0801587	0.850599	0.294517	0.63097	0.251404	0.591171	-1.36357	0.164887	-0.856531	0.397401	-0.678784	0.53594	0.682051
arachidonate (20:4n6)	5.61733e-16	0.606539	-1.69002	0.426002	1.78448	0.696003	5.61733e-16	0.521406	-0.0747189	0.929498	-0.716353	0.466184	5.61733e-16	0.383678	-3.25096	0.000709325	-1.20661	0.522668	5.61733e-16	0.410238	-1.63566	0.159153	-3.70744	0.00191959	-3.4861	0.000298163	0.489673	0.449408	0.663499	0.6751	-2.30813	0.0123093	-0.0223777	0.984866	3.62595	0.00536402	-3.4861	0.000157367	-2.76129	0.00442868	-0.543109	0.381743	-2.30813	0.00961504	-1.65804	0.0484005	-0.081494	0.921668	3.97577
palmitate (16:0)	0.0248675	0.989048	0.0861273	0.963302	0.266229	0.863408	-0.289862	0.521406	-0.203045	0.699432	-0.624249	0.497609	-1.28687	0.0013828	-0.88129	0.0413429	0.0659823	0.925418	-1.6016	0.000946385	-1.17046	0.051527	-0.824496	0.168098	0.882723	0.0435913	0.414382	0.30696	-0.11658	0.855301	0.923892	0.0905348	0.51681	0.432935	0.16595	0.791308	-0.404148	0.271242	-0.466908	0.289955	-0.0505982	0.885668	-0.677708	0.16417	-0.653652	0.2001	-0.658546	0.264755	-0.468341
nonadecanoate (19:0)	0.388845	0.520805	0.200506	0.869547	0.585669	0.696003	0.229834	0.521406	-0.000107005	0.999557	-0.425201	0.641474	-0.95112	0.00279346	-0.173036	0.558639	0.446215	0.297764	-1.11013	0.0116841	-0.373649	0.40351	-0.564655	0.327039	0.311015	0.40523	-0.274539	0.490463	-0.403534	0.379127	0.25745	0.511926	-0.516444	0.321797	-0.260275	0.554776	-0.640105	0.0776306	-0.447575	0.222529	0.0426807	0.903644	-0.852681	0.0331371	-0.890092	0.0172136	-0.824931	0.100674	-0.585554
margarate (17:0)	0.158124	0.843816	0.225593	0.886256	0.238235	0.882094	0.138849	0.589909	-0.0586522	0.904293	-0.703853	0.369636	-1.427	0.00111736	-1.325	0.00488481	-0.184391	0.787354	-1.44627	0.00159242	-1.60924	0.0232678	-1.12648	0.0824972	0.679684	0.139151	0.634235	0.153847	0.211666	0.74983	0.540889	0.301469	0.562909	0.432768	0.152982	0.822144	-0.747313	0.0530851	-0.690761	0.114805	0.0272747	0.940693	-0.905383	0.0657322	-1.04633	0.0475238	-0.973496	0.0930175	-0.0454484
stearate (18:0)	0.360638	0.404312	-0.188999	0.838006	0.227435	0.831692	0.199949	0.521406	-0.0878592	0.874165	-0.490855	0.641474	-0.593336	0.00350252	-0.562515	0.175118	0.308903	0.450793	-0.754025	0.0247984	-0.461376	0.244305	-0.409386	0.419685	0.0580398	0.834864	0.168109	0.58976	-0.32033	0.440797	0.500853	0.111549	0.0612861	0.890328	-0.0107196	0.97447	-0.535297	0.0655478	-0.394406	0.33511	-0.0114268	0.969524	-0.253172	0.342024	-0.40009	0.154256	-0.420106	0.333018	0.110069
pentadecanoate (15:0)	0.0109646	0.992404	-0.130841	0.84925	0.133848	0.882094	-0.239189	0.242088	-0.174066	0.587811	-0.550093	0.357115	-0.356401	0.0300112	-0.494376	0.0581457	0.154349	0.723282	-0.606555	0.00551401	-0.537602	0.09879	-0.529592	0.150194	0.467141	0.0970777	0.536143	0.0712134	0.383865	0.391143	0.331963	0.191448	0.25916	0.426048	0.37157	0.186122	0.11074	0.653256	0.0417675	0.889199	0.538213	0.0581861	-0.274591	0.160739	-0.278441	0.246512	-0.158022	0.607682	0.069002
arachidate (20:0)	0.406347	0.379293	-0.152115	0.884324	0.256715	0.825287	-0.0625267	0.817715	-0.367365	0.514837	-0.887106	0.583055	-0.073629	0.63443	0.192057	0.633457	1.32921	0.0449333	-0.542503	0.0774812	-0.0231921	0.961756	0.18539	0.791102	-0.244604	0.389019	0.00470058	0.990641	-0.32143	0.446578	0.255449	0.406426	-0.0537086	0.900976	0.0289908	0.941533	-0.318233	0.278202	0.196758	0.646109	1.00778	0.0206332	-0.287054	0.226888	-0.0769008	0.802185	0.214381	0.72504	0.249304
behenate (22:0)*	-0.150573	0.606539	0.0996134	0.903441	0.570262	0.696003	-0.161857	0.521406	-0.344885	0.530282	-0.69973	0.641474	-0.143135	0.448218	0.60866	0.109268	1.84222	0.00357658	-0.154419	0.216436	0.164161	0.677323	0.572227	0.419685	-0.380511	0.306305	-0.256624	0.492193	-0.40475	0.341595	-0.690939	0.0102352	-0.316866	0.299613	0.00565706	0.986257	-0.523646	0.133863	0.352036	0.402985	1.43747	0.00470837	-0.845359	0.00318839	-0.152705	0.673297	0.577884	0.330658	0.123887
N6-methyllysine	-0.985439	0.124237	-0.72673	0.127224	-1.36068	0.696003	-0.769079	0.508179	-0.717416	0.41638	-0.746042	0.583055	-2.2797	6.18726e-05	-1.18671	0.00280766	-0.145519	0.882422	-2.06334	0.00907741	-1.1774	0.0644488	0.469121	0.419685	-1.08623	0.000550234	-2.05175	1.91924e-05	-3.3258	0.00192868	-0.810327	0.0287107	-1.51713	0.000209024	-3.42514	2.11493e-05	-3.36593	4.61967e-07	-3.23846	6.21192e-07	-3.47132	8.8207e-06	-2.87366	0.000384542	-2.69453	0.000652497	-2.95602	9.31367e-05	-0.965516
N6,N6,N6-trimethyllysine	-0.323201	0.606539	0.36678	0.685246	0.120362	0.942916	0.0304958	0.968022	0.963387	0.0699424	0.224427	0.880264	-3.20214	7.29949e-06	-2.55891	3.13868e-05	-1.72506	0.153873	-2.84844	0.00567543	-1.96231	0.0035185	-1.62099	0.0361199	-1.74848	2.25384e-05	-2.85291	1.35477e-06	-3.17794	0.00390884	-1.47521	0.00158301	-1.88965	0.00121464	-2.4611	2.40663e-06	-4.95062	1.31681e-08	-5.41182	1.35314e-08	-4.90299	1.49444e-06	-4.32365	0.000140067	-3.85196	7.08363e-07	-4.08209	9.30166e-05	-1.10442
N-acetyl-cadaverine	-5.00417	0.0198357	-3.55653	0.0345385	-2.91322	0.146462	-2.02921	0.173123	-1.75671	0.00466212	-0.060387	0.990811	-0.784532	0.40975	-0.296106	0.602159	-0.302548	0.85155	2.19044	0.0278749	1.50371	0.0524819	2.55028	0.00952427	-2.44394	0.0259658	-2.67564	0.00115455	-4.01844	0.000309958	-0.0591306	0.882798	1.15682	0.130246	0.457322	0.517511	-3.22847	3.26914e-06	-2.97174	6.39484e-06	-4.32099	0.00234149	2.13131	0.0218603	2.66053	6.40576e-05	3.00761	0.000111376	-0.231697
saccharopine	-0.509719	0.608577	0.236065	0.826976	-0.431218	0.831692	0.686761	0.590959	0.728812	0.0520579	-0.0221967	0.990811	-2.01147	0.00227639	-1.45002	0.00050644	0.724734	0.436492	-0.814986	0.440972	-0.957276	0.0592082	1.13376	0.165549	-2.15195	0.00153008	-2.10161	9.09754e-05	-3.56082	0.00126664	-2.71268	0.000177996	-1.91656	0.00113739	-4.04305	8.12993e-07	-4.16342	2.13515e-08	-3.55163	4.12006e-08	-2.83609	1.04716e-05	-3.52767	0.00386586	-2.87383	1.19751e-06	-2.9093	0.00129319	0.0503431
fructosyllysine	0.591916	0.437265	-0.415644	0.757466	0.31464	0.862837	0.154465	0.521406	1.57335	0.0166571	0.393295	0.776149	-0.132543	0.692062	-2.12156	0.000577963	0.282385	0.778308	-0.569994	0.0612685	-0.132566	0.838794	0.36104	0.495618	0.144395	0.660958	1.12318	0.0068599	-1.10123	0.0385325	-0.0756448	0.793118	-0.104425	0.87315	-1.59854	0.00745798	0.0118517	0.939279	-0.99838	0.000980702	-0.818843	0.18327	-0.645639	0.00182306	-0.236991	0.461148	-1.2375	0.000708921	0.97878
N,N,N-trimethyl-5-aminovalerate	-0.0824878	0.979329	0.161868	0.959514	1.3437	0.241095	0.0379568	0.959503	0.41786	0.501799	-0.228189	0.898762	-0.528641	0.47214	-0.391676	0.488552	0.457086	0.617159	-0.408196	0.447675	-0.135684	0.869782	-1.11481	0.170608	-4.14463	0.000127893	-3.89461	8.46606e-05	-5.36345	2.28756e-05	-4.32238	6.51913e-06	-3.82801	0.000794154	-4.11501	1.71342e-07	-4.67327	8.36541e-06	-4.28629	4.68429e-07	-4.90637	1.74974e-05	-4.73057	4.94197e-06	-3.96369	1.17714e-06	-5.22982	4.65243e-05	0.250014
N6,N6-dimethyllysine	-1.6362	0.41334	-0.510624	0.402268	-1.81194	0.543379	0.190662	0.85862	-0.39499	0.677905	-0.928315	0.348972	-3.37445	0.000131611	-2.61501	0.000279201	-1.79737	0.0826388	-1.54759	0.246067	-2.49938	0.00623757	-0.913743	0.237078	-1.6341	4.33849e-05	-1.61473	1.74774e-05	-2.67445	0.00122829	2.12983	0.0632119	3.27477	1.02373e-05	0.913743	0.182004	-5.00855	3.00896e-06	-4.22975	3.17565e-06	-4.47181	6.67806e-06	0.582236	0.300611	0.775392	0.195147	5.61733e-16	0.387243	0.0193677
5-aminovalerate	0.407405	0.597239	-1.41396	0.0297514	-0.578099	0.361353	0.82163	0.508179	0.502066	0.399304	-0.245018	0.845615	-2.97758	3.18702e-05	-3.45549	8.40334e-06	-1.38686	0.084463	-2.56336	0.0041753	-1.53947	0.00573565	-1.05378	0.0358899	-0.729391	0.0738721	-0.25148	0.456679	-1.72681	0.000809025	-1.71166	0.000202226	-3.05512	1.87348e-06	-3.69458	1.41784e-07	-3.70697	5.58042e-08	-3.70697	7.28883e-08	-3.11367	0.00012764	-4.27502	7.71755e-05	-4.59458	3.37539e-06	-4.74836	3.84189e-06	0.477911
N6-carboxyethyllysine	-0.391678	0.721297	0.00799917	0.994918	-0.841949	0.696003	1.07253	0.521406	0.676741	0.501799	-0.0685211	0.986174	-2.75516	0.000321028	-3.28919	0.000210352	-1.22487	0.277178	-1.29096	0.232727	-2.62045	0.0120176	-0.451441	0.671728	-3.5145	0.000157323	-2.47718	0.00137037	-3.95806	0.00112381	-2.97991	0.000376326	-1.54291	0.00983851	-3.87374	3.931e-05	-6.26966	1.59919e-08	-5.76637	5.15803e-08	-5.18293	8.36209e-06	-4.27086	0.00111961	-4.16336	0.00047488	-4.32518	0.00135473	1.03732
lysine	-0.442956	0.404312	-0.764178	0.0531394	-0.279744	0.835223	-0.199747	0.508179	0.0884372	0.728376	-0.257817	0.641474	-2.6334	5.34585e-06	-2.60323	6.24121e-06	-2.15392	0.0176509	-2.39019	7.03801e-05	-1.75062	5.09906e-05	-2.13199	5.27382e-05	-0.733556	0.00252983	-0.423693	0.0027523	-0.941306	0.0720752	-1.02521	0.00216498	-1.03657	0.00103735	-1.06975	5.56246e-05	-3.36696	2.45802e-09	-3.02693	2.50323e-07	-3.09523	1.46089e-06	-3.4154	3.36586e-08	-2.78719	7.0558e-09	-3.20174	1.06479e-06	0.309863
cadaverine	-0.183543	0.606539	-0.493205	0.274761	-4.996e-16	0.696003	5.61733e-16	0.521406	5.61733e-16	0.501799	5.61733e-16	0.641474	-0.183543	0.383678	-0.493205	0.0652036	-4.996e-16	0.436492	5.61733e-16	0.410238	5.61733e-16	0.408512	5.61733e-16	0.419685	-0.523155	0.169294	-0.213493	0.571647	-0.706698	0.0658443	-0.0468121	0.392956	-0.0468121	0.419479	-0.0468121	0.39237	-0.706698	0.0311644	-0.706698	0.0325577	-0.706698	0.0340463	-0.0468121	0.361953	-0.0468121	0.375707	-0.0468121	0.387243	0.309662
6-oxopiperidine-2-carboxylate	0.143756	0.606539	0.628281	0.514843	1.22391	0.178126	0.277435	0.521406	0.885366	0.0449904	0.0597579	0.952713	-5.61733e-16	0.383678	0.0532568	0.854261	1.15862	0.084463	0.133679	0.716212	0.310342	0.508693	-0.00553233	0.986208	-2.14409	1.33143e-06	-1.99921	2.49266e-05	-1.82103	0.00165836	-2.27888	1.33275e-05	-1.64948	0.00576963	-0.875673	0.00173373	-2.14409	1.2887e-07	-1.94596	4.41482e-05	-0.662412	0.0388958	-2.1452	0.000155296	-1.33914	3.79715e-05	-0.881205	0.0102276	0.144875
N6-acetyllysine	-0.920109	0.41334	-1.46814	0.0297514	-0.292155	0.841296	-0.205353	0.772193	-0.350671	0.243211	-0.680523	0.485764	-2.87399	0.000172346	-3.45438	4.89988e-06	-2.34735	0.0308277	-2.15923	0.0107351	-2.3369	0.000104811	-2.73572	4.36929e-05	-2.02269	0.00263947	-0.107807	0.752496	-0.326873	0.602075	-2.12381	0.00131515	-0.756956	0.0185424	0.199967	0.282477	-4.89668	2.06262e-07	-3.56218	2.27439e-06	-2.67423	0.00018561	-4.28304	1.72648e-05	-3.09386	1.73988e-07	-2.53576	1.04587e-05	1.91489
N2,N6-diacetyllysine	-0.932168	0.515049	-2.59894	0.117037	-1.11712	0.696003	2.80867e-16	0.521406	-0.573352	0.350399	-0.871391	0.583055	-3.08501	0.000324958	-3.68781	0.000420116	-1.07078	0.392232	-2.15284	0.00506022	-1.66223	0.0512696	-0.825046	0.0490092	-2.67244	0.00102338	0.690533	0.268014	0.0189943	0.97874	-2.84732	0.00104632	-1.15112	0.111748	-0.340842	0.255027	-5.75744	3.45896e-09	-2.99728	3.84124e-06	-1.05179	0.0886715	-5.00016	8.6011e-09	-2.81334	4.12905e-05	-1.16589	0.00157408	3.36297
N2-acetyllysine	-0.844449	0.448029	-2.94506	0.0355819	-0.825466	0.696003	0	NA	-0.806226	0.00325683	-1.17853	0.358319	-2.5184	0.000277006	-5.06996	1.48402e-05	-2.13068	0.0978735	-1.67395	0.00520898	-2.93113	0.00113013	-2.48375	7.26437e-05	-1.333	0.0270981	2.16694	0.00407091	0.736843	0.33374	-1.24985	0.0489767	0.149476	0.850539	0.838979	0.0715481	-3.8514	1.7329e-06	-2.90303	1.59348e-05	-1.39384	0.0433183	-2.9238	3.70003e-05	-2.78165	6.70541e-05	-1.64478	0.00239026	3.49994
2-aminoadipate	1.39966	0.10388	-0.828938	0.357301	-0.0536135	0.964238	1.02006	0.521406	-1.17268	0.0523289	-0.667807	0.575875	-1.12086	0.0287595	2.18518	3.65004e-05	2.54484	0.00845283	-1.50047	0.114845	1.84144	0.01145	1.93064	0.00337051	-2.83411	0.000349426	-1.9331	0.000249206	-1.42801	0.0188478	-2.28328	7.99015e-05	-3.61087	0.000158708	-2.33046	0.000173881	-3.95497	2.32559e-06	0.252077	0.46233	1.11683	0.025033	-3.78375	0.00094412	-1.76943	0.000607596	-0.399813	0.259934	0.901006
pipecolate	-1.64538	0.0210712	-0.972741	0.0355819	-0.525355	0.696003	-0.641541	0.250968	-1.48502	0.0359459	-0.436451	0.641474	-1.42342	0.00124405	1.41211	0.000835636	-0.305653	0.66341	-0.419582	0.246067	0.899827	0.0591158	-0.216749	0.496599	-0.700754	0.0188935	0.143188	0.573212	1.96643	0.00189592	-0.922782	0.0218381	0.593794	0.0357994	2.86442	6.845e-06	-2.12417	1.47824e-05	1.55529	3.66415e-05	1.66077	0.00190241	-1.34236	0.00152836	1.49362	0.00804189	2.64767	6.45104e-05	0.843942
1-stearoyl-GPE (18:0)	-0.28661	0.92608	0.317396	0.751117	1.73641	0.696003	-0.646418	0.521406	-1.50258	0.177342	-0.467196	0.647314	-0.9132	0.252986	1.59265	0.00281552	2.63537	0.00233668	-1.27301	0.254019	-0.227323	0.781887	0.431761	0.693358	-1.20425	0.140053	-2.49544	0.00179226	-4.41972	0.000347114	-1.50628	0.141798	-2.19347	0.00629209	-2.69873	0.0196859	-2.11745	0.012496	-0.902789	0.170493	-1.78435	0.0170728	-2.77929	0.00152849	-2.42079	0.00852598	-2.26696	0.00384706	-1.29119
1-lignoceroyl-GPC (24:0)	-0.857343	0.563759	0.476372	0.709144	0.557246	0.696003	-1.34662	0.131632	-1.0529	0.308439	-0.707568	0.485764	-0.394315	0.426176	0.441164	0.419434	0.950317	0.0978735	-0.883589	0.297017	-1.08811	0.165638	-0.314497	0.511661	-0.833925	0.0733232	-1.50854	0.00818284	-1.98516	0.000192107	-1.00124	0.193067	-0.342133	0.533866	-0.737879	0.1248	-1.22824	0.00795059	-1.06737	0.0229991	-1.03484	0.0222986	-1.88483	0.0014202	-1.43024	0.0342781	-1.05238	0.0161238	-0.674611
1-stearoyl-GPI (18:0)	-0.546283	0.434886	-0.147856	0.963302	0.359594	0.863408	-1.55994	0.219916	-0.699291	0.501799	-0.839706	0.641474	-2.38087	0.00116339	-1.92825	0.0278252	-1.29494	0.233546	-3.39453	0.000745107	-2.47969	0.0595552	-2.49424	0.0298883	0.521128	0.388016	-1.01595	0.180094	-0.629161	0.460682	0.121033	0.807761	-1.01762	0.386375	-0.123378	0.883022	-1.85974	0.00992954	-2.9442	0.00172473	-1.9241	0.0120615	-3.27349	0.00128305	-3.4973	0.000809304	-2.61762	0.00847787	-1.53708
1-palmitoyl-GPE (16:0)	-0.57273	0.826958	0.1485	0.9448	0.27411	0.921758	0.234397	0.825466	-1.10631	0.179878	-0.449601	0.641474	-1.89018	0.0111947	0.894134	0.0825811	0.832276	0.436492	-1.08305	0.410238	-0.36068	0.568458	0.108566	0.924926	-2.80972	0.00344084	-3.42151	0.000988719	-3.82761	0.0058069	-2.84458	0.0360733	-2.73514	0.001327	-3.01563	0.0176237	-4.6999	8.87255e-05	-2.52738	0.0026124	-2.99534	0.00119465	-3.92763	0.000354102	-3.09582	0.00060703	-2.90706	0.000304853	-0.611792
1-stearoyl-GPC (18:0)	-0.256352	0.93937	0.499211	0.665146	0.811221	0.696003	-0.190261	0.788606	-0.599876	0.501799	-0.315858	0.652101	-0.696933	0.321473	-0.577682	0.195124	0.395232	0.436492	-0.630842	0.526432	-1.67677	0.0515633	-0.731847	0.162283	-1.851	0.0111044	-1.47437	0.00170474	-2.83316	3.41834e-05	-1.80814	0.084816	-0.675943	0.224365	-1.72272	0.00676617	-2.54794	9.1026e-05	-2.05206	0.00033423	-2.43793	0.000145971	-2.43898	0.000683261	-2.35271	0.00609215	-2.45457	0.000160449	0.376631
1-palmitoyl-GPI* (16:0)	-0.838413	0.340618	-0.461651	0.84898	0.444184	0.861536	-1.55754	0.209922	-0.767139	0.501799	-1.07624	0.425692	-3.1584	0.000253302	-3.0293	0.00392461	-2.66383	0.0469514	-3.87753	0.000572092	-3.33479	0.00836968	-4.18426	0.000756012	0.313807	0.640825	-0.566515	0.449344	-0.423312	0.655314	0.0700545	0.911365	-0.433506	0.68033	0.615532	0.441587	-2.84459	0.00250772	-3.59582	0.00161593	-3.08714	0.00198925	-3.80747	0.000484197	-3.7683	0.000409386	-3.56873	0.000372151	-0.880322
1-palmitoyl-GPA (16:0)	0.109515	0.902617	0.149727	0.853762	0.126499	0.793437	0.042124	0.521406	0	NA	0	NA	-0.20241	0.193693	-0.178356	0.390824	4.996e-16	0.436492	-0.269801	0.43118	-0.328083	0.207219	-0.126499	0.419685	-2.63993	0.000365407	-2.66398	0.000549828	-2.84234	0.000938463	-2.31571	0.00296373	-2.29955	0.00212765	-2.50113	0.000585341	-2.84234	9.00945e-05	-2.84234	0.000100262	-2.84234	0.000122061	-2.58551	0.000293446	-2.62763	0.000258654	-2.62763	0.000278439	-0.0240544
1-linoleoyl-GPS (18:2)*	0	NA	-0.225725	0.685246	0.285072	0.793437	0	NA	0	NA	0	NA	0	NA	-0.225725	0.390824	-6.66134e-16	0.436492	0	NA	0	NA	-0.285072	0.419685	-0.640891	0.17795	-0.415166	0.432775	-0.640891	0.247002	-0.344722	0.392956	-0.344722	0.419479	-0.0596502	0.922846	-0.640891	0.164015	-0.640891	0.170364	-0.640891	0.172105	-0.344722	0.361953	-0.344722	0.375707	-0.344722	0.387243	0.225725
1-oleoyl-GPS (18:1)	-5.61733e-16	0.606539	-0.315898	0.685246	0.705839	0.696003	-5.61733e-16	0.521406	-5.61733e-16	0.501799	0.0342866	0.935793	-5.61733e-16	0.383678	-0.315898	0.390824	0.088406	0.538758	-5.61733e-16	0.410238	-5.61733e-16	0.408512	-0.583147	0.372014	-1.10286	0.0602972	-0.786965	0.240542	-1.10286	0.100308	-0.158436	0.392956	-0.158436	0.419479	0.547404	0.343519	-1.10286	0.0530972	-1.10286	0.0545519	-1.01446	0.0794948	-0.158436	0.361953	-0.158436	0.375707	-0.035743	0.884032	0.315898
2-stearoyl-GPE (18:0)*	0.518485	0.606539	-2.80867e-16	0.685246	0.412742	0.793437	-2.80867e-16	0.521406	0.148569	0.501799	-2.80867e-16	0.641474	-2.80867e-16	0.383678	-2.80867e-16	0.390824	0	NA	-0.518485	0.410238	0.148569	0.408512	-0.412742	0.419685	-1.18451	0.187938	-1.18451	0.193737	-1.18451	0.256489	-0.498964	0.56089	-1.01745	0.13287	-0.604707	0.440829	-1.18451	0.172923	-1.18451	0.179191	-1.18451	0.181401	-1.01745	0.109077	-0.86888	0.180197	-1.01745	0.11637	-2.80867e-16
1-palmitoyl-GPS (16:0)*	0.403852	0.78689	0.0754045	0.980611	0.920931	0.825287	-0.789393	0.369409	-0.828745	0.321022	-0.224003	0.901179	0.108651	0.833571	0.153847	0.879016	0.511829	0.716488	-1.08459	0.138152	-0.750303	0.266137	-0.633105	0.625593	-2.81113	0.00926379	-2.72862	0.0374052	-2.60974	0.0698813	-1.96389	0.042785	-2.20982	0.028206	-1.24542	0.293371	-2.70248	0.0108081	-2.57477	0.0187216	-2.09792	0.0536228	-3.04848	0.000498068	-2.96012	0.000662695	-1.87852	0.0473813	0.0825132
1-oleoyl-GPE (18:1)	0.119264	0.980205	0.317946	0.84925	0.516952	0.863408	0.684545	0.521406	-1.57789	0.159626	-0.668257	0.511346	-1.3601	0.0179248	1.23404	0.0704368	1.76816	0.125213	-0.794819	0.515271	-0.661795	0.408512	0.582951	0.612067	-4.3781	0.000376646	-3.72283	0.00137037	-4.15141	0.00474243	-3.32345	0.0155471	-2.4695	0.00252672	-2.69907	0.0273647	-5.7382	7.0361e-06	-2.4888	0.00358804	-2.38325	0.00333429	-4.11827	0.000241869	-3.1313	0.00244303	-2.11612	0.00381229	0.655263
1-linoleoyl-GPE (18:2)*	-0.0152624	0.99316	0.659044	0.573923	0.54859	0.824259	0.35395	0.521406	-0.606324	0.393087	-0.616808	0.583055	-1.06622	0.0387034	0.0825687	0.896053	0.264111	0.717322	-0.697003	0.484351	-1.1828	0.0129122	-0.901287	0.260725	-4.39072	0.000264195	-4.05675	0.000679992	-3.99239	0.001823	-3.73493	0.0048555	-2.72665	0.00015966	-2.77274	0.00243938	-5.45694	5.00544e-06	-3.97418	0.000120131	-3.72828	0.000163575	-4.43193	9.5325e-06	-3.90945	3.17968e-05	-3.67403	7.69972e-05	0.33397
1-oleoyl-GPG (18:1)*	-2.80867e-16	0.606539	-0.336072	0.914297	0.640987	0.841296	0.046737	0.521406	-2.80867e-16	0.501799	-2.80867e-16	0.641474	-2.80867e-16	0.383678	-1.48019	0.0220491	-0.771586	0.436492	0.046737	0.410238	-1.14412	0.207219	-1.41257	0.156453	-2.94419	0.0134819	-1.464	0.21083	-2.1726	0.143877	-0.890456	0.239498	0.253663	0.850539	0.522117	0.648067	-2.94419	0.0112561	-2.94419	0.0118953	-2.94419	0.0125923	-0.843719	0.242456	-0.890456	0.222359	-0.890456	0.234388	1.48019
1-palmitoyl-GPC (16:0)	-0.283185	0.947445	-0.0498834	0.977816	0.530695	0.725138	0.16131	0.8318	-0.666243	0.386109	-0.648966	0.425692	-1.28245	0.097905	-2.14749	0.000285039	-1.06164	0.194907	-0.837957	0.50599	-2.76385	0.00435396	-2.24131	0.000316563	-4.1209	0.000331679	-1.87283	0.000510789	-2.86749	0.00109177	-3.60542	0.0133233	-1.12404	0.0919651	-1.53812	0.00513983	-5.40336	1.02718e-07	-4.02033	4.15339e-07	-3.92913	5.86268e-06	-4.44337	3.31792e-05	-3.8879	7.12734e-05	-3.77943	5.8084e-06	2.24807
2-palmitoleoyl-GPC* (16:1)*	0.461064	0.765663	-0.0195853	0.992365	0.0493374	0.965047	0.552954	0.521406	-0.399555	0.560116	-0.535445	0.641474	-0.392903	0.231538	-1.68247	0.00177475	-0.492832	0.527098	-0.301013	0.718345	-2.06244	0.0391648	-1.07761	0.0314503	-6.22122	4.54613e-06	-3.87489	5.07061e-05	-5.11163	0.000216991	-4.1976	0.000665281	-2.33191	0.0106236	-3.49973	5.05673e-06	-6.61412	4.23348e-08	-5.55735	3.57962e-07	-5.60446	1.62323e-06	-4.49861	2.49565e-05	-4.39435	4.91357e-05	-4.57735	1.17777e-05	2.34633
1-linoleoyl-GPI* (18:2)*	-0.284133	0.843816	-1.0357	0.494076	0.88218	0.726662	0.195688	0.598653	-0.807898	0.321022	-1.67402	0.296668	-5.39411	5.47166e-09	-5.36392	7.63928e-06	-3.15672	0.0315564	-4.91429	0.000332317	-5.13612	0.000414197	-5.71292	0.000205181	-0.560381	0.404949	1.79738	0.0388449	0.36969	0.739811	-0.590823	0.500129	1.01537	0.27765	1.50556	0.064653	-5.95449	1.13193e-05	-3.56654	0.000506988	-2.78703	0.00410282	-5.50512	2.41728e-05	-4.12075	0.000441808	-4.20736	0.000784613	2.35776
1-oleoyl-GPI (18:1)	-0.448003	0.735249	-1.24976	0.461703	0.820503	0.768957	-0.768597	0.521406	-0.496871	0.617757	-1.51568	0.348329	-3.85318	0.000179808	-4.58252	0.00037385	-1.46884	0.212169	-4.17377	0.00136133	-3.82964	0.00306234	-3.80503	0.00231202	0.266678	0.721465	3.04934	0.00430442	1.03896	0.342584	0.937551	0.335356	2.91845	0.0179337	2.97834	0.00676607	-3.5865	0.00178663	-1.53319	0.106417	-0.429885	0.557515	-3.23622	0.00314319	-0.911184	0.259297	-0.82669	0.363033	2.78266
1-linoleoyl-GPC (18:2)	-0.057014	0.99316	-0.0576605	0.971655	1.43092	0.696003	0.988389	0.508179	-0.298536	0.713404	-0.832001	0.358319	-2.93839	0.0006248	-3.51446	1.24431e-05	-1.18683	0.527098	-1.89298	0.243571	-3.75534	0.0014129	-3.44975	4.29076e-05	-5.16217	4.63212e-05	-2.19716	6.74655e-05	-3.95537	0.0255884	-4.36915	0.00873729	-1.40479	0.0402696	-1.67442	0.0014394	-8.10055	2.45682e-09	-5.71162	2.85866e-07	-5.14219	1.03883e-06	-6.26213	2.2248e-05	-5.16013	2.34863e-05	-5.12416	3.01646e-06	2.96501
1-palmitoyl-GPG (16:0)*	0.594903	0.78689	-0.0619519	0.973263	0.909414	0.793437	1.29881	0.399247	0.731312	0.560116	-0.652223	0.686983	-0.278188	0.383678	-2.76925	0.00147046	-0.46164	0.744747	0.425723	0.73576	-1.97599	0.082821	-2.02328	0.0833844	-5.89786	0.000133715	-2.73625	0.00688346	-3.8171	0.0162837	-4.29581	0.0066546	-1.79105	0.0720821	-1.90054	0.0735183	-6.17605	2.29153e-05	-5.5055	0.000223215	-4.27874	0.00155007	-3.87009	0.00308446	-3.76704	0.00459529	-3.92381	0.00171684	3.16161
1-oleoyl-GPC (18:1)	-0.256812	0.96204	-0.080813	0.968439	0.54889	0.808235	0.990586	0.508179	-0.472944	0.530282	-0.741541	0.267954	-1.75555	0.0366419	-2.44666	3.79065e-05	-0.540955	0.587631	-0.508154	0.740551	-2.83879	0.0120015	-1.83138	0.000189845	-4.70927	0.000238005	-1.30628	0.0063874	-2.80079	0.00984219	-3.4531	0.036724	0.125887	0.884521	-0.738921	0.094182	-6.46482	1.4688e-07	-3.75294	1.75772e-06	-3.34175	2.0653e-05	-3.96125	0.000532805	-2.7129	0.00267444	-2.57031	0.000129261	3.40299
1-palmitoleoyl-GPC* (16:1)*	0.323816	0.93937	-0.0820849	0.968439	0.403081	0.843175	0.838234	0.521406	-0.491204	0.544311	-1.05912	0.17118	-0.941313	0.340674	-2.22732	2.5651e-05	-0.382965	0.713681	-0.426896	0.734479	-2.63644	0.0213878	-1.84516	0.000319958	-5.52377	0.000349225	-2.12015	0.000454638	-3.7251	0.00301864	-3.98557	0.00584354	-0.987845	0.22367	-2.10763	0.000615221	-6.46509	2.754e-07	-4.34747	1.07103e-06	-4.10807	1.17073e-05	-4.41246	0.00032773	-3.62429	0.000607596	-3.9528	8.72468e-06	3.40362
1-linolenoyl-GPC (18:3)*	1.24973	0.619521	0.433889	0.765597	1.49165	0.696003	0.941681	0.380203	0.197965	0.865601	-0.0966536	0.951488	-1.69947	0.0760034	-3.98069	4.45246e-05	-2.19023	0.180047	-2.00751	0.202361	-4.21661	0.00243598	-3.77853	4.28912e-05	-5.48081	0.000337597	-2.07195	0.00242378	-3.74635	0.00983737	-3.92145	0.014174	-1.32843	0.0639939	-1.94507	0.00102358	-7.18028	2.9607e-08	-6.05264	6.20181e-07	-5.93657	8.98162e-06	-5.92897	9.78028e-06	-5.54504	8.78842e-05	-5.72359	2.00393e-06	3.40886
1-linoleoyl-GPG (18:2)*	0.161247	0.67185	-0.335558	0.886256	0.473011	0.863408	0.018982	0.521406	0.0451703	0.501799	-0.175151	0.641474	-0.0242567	0.383678	-3.44451	0.000129129	-1.99952	0.114827	-0.166522	0.455551	-3.06378	0.0037683	-2.64768	0.00843401	-3.7347	0.00873025	-0.31445	0.800227	-1.58429	0.330352	-2.70635	0.00403828	0.217096	0.854588	-0.244174	0.822144	-3.75896	0.00694049	-3.75896	0.00727434	-3.58381	0.0102451	-2.87287	0.00149022	-2.84669	0.00166983	-2.89186	0.00152734	3.42025
2-palmitoyl-GPC* (16:0)*	0.586312	0.792447	-0.83092	0.751766	1.37397	0.696003	1.12347e-15	0.521406	-0.0399279	0.959341	-1.06976	0.488216	-0.515651	0.19492	-3.68875	3.79065e-05	-1.26975	0.45388	-1.10196	0.346375	-2.89776	0.0424967	-3.71349	0.000255642	-5.29422	0.000127893	-1.62329	0.0371922	-3.26356	0.040634	-3.90553	0.00899467	-1.65183	0.228339	-1.08721	0.14174	-5.80987	1.00977e-05	-5.31204	4.50179e-05	-4.53331	0.000577692	-5.00749	1.28692e-05	-4.54959	6.61236e-05	-4.8007	3.67066e-05	3.67093
heptanoate (7:0)	0.0111897	0.99316	-0.191064	0.945791	0.127033	0.890957	-1.46765	0.131632	-0.473254	0.519736	-0.137992	0.880264	0.46946	0.336694	-0.0124803	0.98326	-0.597127	0.323327	-1.00938	0.181206	-0.29467	0.698894	-0.862151	0.0824855	1.34573	0.00524614	2.0852	0.00464447	2.60131	0.000618737	1.34024	0.0342696	1.87745	0.00510501	2.71165	8.78781e-06	1.81519	0.000474892	2.07272	8.31024e-06	2.00418	8.05941e-05	0.330858	0.42477	1.58278	0.0194169	1.8495	0.00129674	0.739467
cysteine sulfinic acid	-1.78007	0.280237	0.575853	0.489587	-0.8731	0.696003	-2.18141	0.0989737	0.193184	0.830457	-1.06447	0.267954	-3.14192	0.000812604	-2.04321	0.0147234	-0.0672479	0.931846	-3.54326	0.00702002	-2.42588	0.000302715	-0.258616	0.636245	-0.450517	0.251954	-3.22336	1.9122e-05	-4.59762	0.000238278	-1.25794	0.178826	-1.67485	0.00329582	-4.49808	6.50304e-06	-3.59244	0.000113221	-5.26657	2.82382e-05	-4.66487	6.64204e-07	-4.8012	9.96399e-06	-4.10074	4.33276e-07	-4.75669	5.36157e-06	-2.77284
N-acetylcysteine	-0.929321	0.606539	0.483665	0.778771	-1.46992	0.131716	1.18912	0.165601	0.55345	0.501799	0.34963	0.822738	-4.48789	6.23472e-05	-2.54327	0.00480271	-0.959083	0.319403	-2.36945	0.0431656	-2.47348	0.0110593	0.860464	0.147033	-3.22078	0.000219591	-4.88299	1.21881e-05	-6.12832	6.24583e-06	-4.09927	0.00199812	-4.3485	0.0002949	-7.54741	1.30741e-08	-7.70867	1.60073e-08	-7.42626	6.50536e-07	-7.08741	2.02553e-06	-6.46872	2.56e-07	-6.82198	1.61969e-07	-6.68695	1.56067e-06	-1.66221
S-adenosylmethionine (SAM)	1.41027	0.10388	0.715618	0.685246	-0.191096	0.894704	2.97885	0.0735862	3.4571	0.000271145	-0.362104	0.819582	-2.66473	8.69696e-05	-3.40779	0.000671453	2.62269	0.0248133	-1.09615	0.14018	-0.666308	0.319781	2.45169	0.0112784	-3.99774	2.25384e-05	-3.95182	0.000255097	-6.79683	3.22274e-05	-2.65062	9.60153e-05	-3.29935	0.000548286	-7.05107	3.98795e-07	-6.66247	6.20541e-09	-7.35961	1.97955e-08	-4.17414	1.35837e-05	-3.74676	0.000132895	-3.96565	1.91931e-06	-4.59938	5.65592e-05	0.0459205
3-sulfo-L-alanine	-1.18837	0.302076	0.403234	0.685246	0.55953	0.696003	-1.04176	0.380203	0.424591	0.494154	-0.181905	0.851024	-1.57805	0.0153464	-0.918682	0.0543497	0.250122	0.734151	-1.43144	0.0697387	-0.897325	0.0381418	-0.491312	0.192498	1.50118	0.00398101	-0.127571	0.776614	-1.10596	0.0824622	0.161451	0.83615	0.12431	0.850539	-0.697782	0.194548	-0.0768733	0.901494	-1.04625	0.0522702	-0.855836	0.13527	-1.26999	0.0256453	-0.773015	0.122264	-1.18909	0.0279442	-1.62875
N-acetylmethionine	-0.63147	0.116684	-0.520719	0.357899	-0.0651014	0.964238	-0.561405	0.508179	-0.412256	0.501799	-0.479369	0.583055	-4.18145	7.4451e-07	-3.16863	0.00012845	-1.84233	0.0912056	-4.11139	6.22008e-05	-3.06017	2.31958e-05	-2.25659	4.28912e-05	-1.71962	0.000192191	-2.30313	1.96858e-05	-3.69366	0.00140782	-1.92406	5.81606e-06	-2.39682	5.45111e-05	-3.33173	2.93832e-08	-5.90107	6.26288e-09	-5.47176	1.4934e-06	-5.53598	4.11342e-07	-6.03545	6.07883e-07	-5.45699	7.98797e-10	-5.58833	3.85767e-08	-0.583514
cysteine	-0.439271	0.606539	-0.259271	0.685246	-0.759042	0.696003	0.37857	0.55039	0.54075	0.321022	0.0738415	0.964872	-2.94502	1.68873e-05	-2.42505	3.67285e-05	-0.259637	0.740886	-2.12718	0.00852495	-1.62503	0.0037683	0.573246	0.361616	-1.8908	0.000359581	-1.98739	4.76216e-05	-4.25575	0.000296625	-2.52433	0.000404528	-2.44092	0.000138974	-5.20905	1.19424e-06	-4.83583	1.35463e-08	-4.41244	2.59617e-07	-4.51538	1.59196e-06	-4.65152	1.27968e-05	-4.06595	2.23471e-06	-4.6358	1.10297e-05	-0.0965867
homocysteine	-1.66483	0.258526	-0.0590567	0.973263	-0.176728	0.696003	5.61733e-16	0.521406	0.204949	0.501799	-0.162791	0.641474	-2.01381	0.0130727	-0.597763	0.224483	-0.0139363	0.962006	-0.348974	0.410238	-0.333757	0.435949	5.61733e-16	0.419685	-2.566	0.0037541	-3.98204	5.14457e-05	-4.40308	6.72131e-07	-4.07796	4.14864e-05	-3.88823	2.60351e-05	-4.42693	2.69572e-08	-4.57981	7.22539e-10	-4.57981	9.44858e-10	-4.41701	1.32313e-07	-4.42693	2.43513e-08	-4.22198	5.96752e-07	-4.42693	3.48518e-08	-1.41604
methionine	-0.218709	0.606539	-0.0360487	0.963302	0.278412	0.726662	-0.267926	0.166379	-0.0164666	0.929498	-0.131253	0.648175	-1.04735	0.000451906	-0.56071	0.0011189	0.114394	0.770544	-1.09657	0.000611733	-0.541128	0.0756641	-0.295271	0.0798594	-0.932541	0.00351139	-1.25078	0.000170667	-1.89167	0.00131234	-1.27941	0.00021583	-1.41499	0.00103735	-1.74142	5.66936e-07	-1.97989	3.43527e-06	-1.81149	9.12325e-06	-1.77728	1.59781e-05	-2.37598	1.07769e-07	-1.95612	3.02917e-07	-2.03669	2.09991e-06	-0.31824
N-formylmethionine	-0.545865	0.228287	-0.174252	0.800231	0.106558	0.933091	-0.610956	0.521406	-0.174581	0.633771	-0.41581	0.641474	-2.50886	8.33667e-06	-2.74898	0.000129129	-1.85505	0.0724149	-2.57395	0.00118743	-2.7493	3.13388e-06	-2.37742	5.48994e-05	-2.05695	4.93844e-05	-1.81541	0.000398557	-2.57994	0.00405595	-2.3227	6.99744e-06	-1.70955	2.02748e-05	-2.19327	1.87491e-07	-4.56581	2.34242e-08	-4.56439	5.30177e-07	-4.435	9.68854e-07	-4.89665	6.33238e-06	-4.45885	3.31492e-10	-4.57069	2.60795e-07	0.241542
hypotaurine	-1.5399	0.0818187	-0.981481	0.180321	-1.7641	0.275176	-1.39635	0.0989737	-0.677449	0.146321	-1.20465	0.159707	-4.25339	6.37616e-06	-3.62791	1.8778e-05	-4.65625	0.00159512	-4.10985	0.000210853	-3.32388	5.35869e-05	-4.0968	2.88115e-05	-2.94018	2.61969e-05	-3.60019	1.87477e-06	-3.43443	0.0010213	-2.57958	0.000179718	-2.68117	8.13131e-05	-3.29803	5.8744e-07	-7.19358	7.95236e-10	-7.2281	1.14294e-08	-8.09068	1.06861e-09	-6.68942	3.19024e-07	-6.00505	2.55837e-09	-7.39483	7.7026e-08	-0.66001
lanthionine	-0.298931	0.425035	0.0494134	0.959514	-1.03681	0.696003	-1.6182	0.0735862	-0.239245	0.705715	-0.769673	0.641474	-2.41823	6.37616e-06	-3.26195	0.000118767	-1.96098	0.12444	-3.7375	0.000115255	-3.55061	1.64474e-05	-1.69384	0.0178631	-1.85144	5.72512e-06	-1.40516	9.47554e-05	-2.14229	0.0214639	-1.33164	0.00037555	-0.537018	0.0541749	-2.36037	2.93681e-05	-4.26967	3.45896e-09	-4.66711	1.99929e-06	-4.10326	9.84184e-06	-5.06914	2.9614e-06	-4.08763	7.08363e-07	-4.05421	4.65243e-05	0.446277
S-methylcysteine	2.89521	0.198045	1.84785	0.416365	-0.724994	0.825287	-0.338107	0.521406	0.160066	0.902027	-1.49266	0.425692	-1.03523	0.359656	-2.46123	0.0704368	0.214255	0.895462	-4.26855	0.000555017	-4.14902	0.00113013	-0.553407	0.419685	-5.47532	0.000748525	-3.69638	0.0094191	-5.57025	0.00113892	0.546397	0.694317	1.27798	0.353994	-3.16874	0.0384428	-6.51055	1.88585e-06	-6.15761	1.33389e-05	-5.356	0.00023513	-3.72215	0.00976749	-2.87104	0.0515442	-3.72215	0.0105256	1.77893
2-hydroxy-4-(methylthio)butanoic acid	-0.143852	0.895249	0.295975	0.869547	1.09701	0.696003	-0.202591	0.598653	-0.0167589	0.98533	-0.154047	0.880264	-4.10706	1.30453e-06	-3.78559	0.000295162	-1.66606	0.144531	-4.1658	0.000126555	-4.09832	0.000267016	-2.91712	4.28912e-05	-0.888647	0.000476577	0.108094	0.84018	-0.96141	0.177936	-1.5407	0.00725166	-0.104135	0.837722	-0.372607	0.104651	-4.99571	1.35463e-08	-3.67749	5.27513e-07	-2.62747	0.000169179	-5.70651	5.26008e-08	-4.20246	9.77841e-06	-3.28973	1.67485e-06	0.996741
methionine sulfone	0	NA	0	NA	6.66134e-16	0.696003	0	NA	-0.0626437	0.501799	-0.776854	0.358319	0	NA	0.0626437	0.390824	0.781347	0.186849	0	NA	0	NA	0.00449296	0.419685	0	NA	0	NA	-6.66134e-16	0.339103	0	NA	0	NA	0	NA	0	NA	0.0626437	0.373574	0.781347	0.0527025	0	NA	0	NA	0.00449296	0.387243	0
N-acetylmethionine sulfoxide	-0.275949	0.591515	-0.472361	0.181818	0.0047446	0.997772	0.261157	0.788606	-0.0171459	0.98533	-0.431968	0.735282	-3.43518	0.000100967	-3.95653	5.50096e-07	-2.19256	0.011233	-2.89808	0.00123576	-3.50132	0.00023303	-2.62928	0.00297442	-1.24615	6.99392e-05	-0.283946	0.127363	-1.2231	0.0112282	-1.52064	0.000490802	-0.754843	0.00270389	-1.21689	0.000137618	-4.68133	4.2936e-06	-4.24048	2.89247e-09	-3.41567	3.41672e-06	-4.41871	2.72014e-05	-4.25616	1.99233e-05	-3.84617	0.000147412	0.962204
taurine	-1.4005	0.0644324	-0.906972	0.44421	-0.451708	0.718988	-1.18283	0.171431	-0.243675	0.663995	-0.792883	0.511346	-3.1041	1.53883e-05	-2.98219	0.000695999	-4.2426	0.000861524	-2.88644	0.000931756	-2.31889	0.00179587	-4.58377	6.52726e-05	-1.89274	7.03371e-05	-2.31493	0.00202098	-1.82826	0.0037359	-2.10987	0.000771602	-2.03853	0.00071975	-1.0966	0.00519016	-4.99685	5.82495e-08	-5.29712	3.74047e-08	-6.07086	8.26429e-08	-4.99631	4.51724e-06	-4.35742	5.82683e-06	-5.68037	3.93171e-06	-0.422182
methionine sulfoxide	-0.435029	0.41334	-0.805866	0.171798	0.563744	0.696003	-0.019778	0.971269	-0.300542	0.617757	-0.159561	0.886161	0.837155	0.135036	1.79602	0.00117171	0.831222	0.116986	1.25241	0.0101947	2.30135	0.00114092	0.107918	0.862643	-0.768238	0.00299059	-0.621268	0.02815	-0.168501	0.627887	-1.15239	0.00121108	-1.37625	0.000590229	0.446123	0.0415384	0.0689167	0.882257	1.17475	0.00185107	0.662721	0.00097238	0.100019	0.732659	0.925092	0.0320695	0.554041	0.315501	0.14697
S-carboxyethylcysteine	0.2494	0.778587	0.21302	0.963302	-0.286019	0.835223	0.150322	0.521406	0.835741	0.205231	-0.174484	0.894459	-2.84769	9.66165e-06	-3.42187	4.09036e-05	-2.07025	0.0509934	-2.94677	0.000234309	-2.79915	0.0554056	-1.95872	0.00717193	0.555434	0.0817913	1.45829	0.000747234	1.24734	0.0463204	0.133375	0.733507	0.999847	0.432768	0.289865	0.203006	-2.29225	5.69499e-07	-1.96359	0.00029821	-0.822912	0.0661179	-2.81339	4.31535e-06	-1.7993	0.000652925	-1.66885	0.00943489	0.902851
N-propionylmethionine	0	NA	0.489751	0.688152	-0.870388	0.696003	0	NA	0	NA	0	NA	0	NA	-0.257148	0.318345	-0.870388	0.226713	0	NA	-0.7469	0.198149	0	NA	0	NA	0.257148	0.299043	0.870388	0.124423	0	NA	0.7469	0.192376	0	NA	0	NA	0	NA	0	NA	0	NA	0	NA	0	NA	0.257148
cystathionine	-1.0683	0.198045	-0.663882	0.328175	-1.00714	0.522421	0.094714	0.916041	0.241559	0.501799	-0.782226	0.515407	-3.99662	5.34585e-06	-3.79441	5.79014e-08	-1.58288	0.0708303	-2.83361	0.00574898	-2.88897	0.000291713	-1.35797	0.0165439	-3.10735	1.28713e-05	-1.88809	5.73238e-07	-2.611	0.00087206	-3.01372	7.66559e-05	-1.39004	0.00450511	-2.45621	9.57738e-07	-7.10397	3.12382e-10	-5.6825	2.40209e-10	-4.19389	1.35236e-06	-5.84732	1.57563e-05	-4.27901	2.2679e-07	-3.81418	1.52428e-05	1.21926
N-acetyltaurine	-1.60015	0.24094	-2.19291	0.153269	-0.110397	0.93537	2.80867e-16	0.521406	0.271706	0.501799	0.187751	0.766959	-2.34431	0.000895532	-4.51176	2.08526e-05	-3.93107	0.00240827	-0.744167	0.230391	-2.04715	0.0279654	-3.63292	4.28912e-05	-3.42066	0.000142614	-1.25321	0.0226408	-1.77704	0.0197493	-3.38686	0.000439544	-1.81218	0.0302637	-0.253494	0.362433	-5.76497	7.22539e-10	-5.76497	9.44858e-10	-5.70811	4.131e-09	-4.13103	6.25718e-08	-3.85932	5.54977e-06	-3.88642	4.19182e-06	2.16745
cystine	1.09824	0.606539	-2.90659	0.427287	2.52083	0.696003	-1.43738	0.521406	-1.27788	0.501799	-0.233375	0.972183	4.53787	0.000109001	0.355514	0.678268	0.862216	0.720644	2.00224	0.363639	1.98423	0.393229	-1.89199	0.339953	-1.12347e-15	0.389019	5.08303	0.000203647	5.06167	0.0188751	1.09824	0.392956	2.17643	0.232643	7.5825	1.59929e-08	4.53787	5.11842e-05	5.43854	7.28972e-07	5.92389	4.70183e-05	3.10049	0.0520345	4.16066	0.00736417	5.69052	0.00635799	5.08303
S-adenosylhomocysteine (SAH)	-0.00474262	0.99316	-1.03566	0.035059	-0.233468	0.843898	-0.107044	0.871584	-0.0147444	0.977885	-0.807294	0.249465	-1.91118	0.000140617	-1.6711	6.56858e-05	-1.55637	0.0544454	-2.01348	0.00437982	-0.650192	0.0731894	-2.1302	6.73694e-05	0.188717	0.242896	1.48469	8.1922e-05	1.87831	0.00361044	0.267758	0.45304	0.532815	0.0797722	1.72862	0.000162843	-1.72247	0.000185996	-0.186416	0.325813	0.32194	0.272425	-1.74573	0.00234021	-0.117377	0.691331	-0.40157	0.103731	1.29597
cysteine s-sulfate	-0.260332	0.93937	-0.928975	0.61186	1.06016	0.696003	-0.824816	0.482832	-0.240941	0.763933	-0.209253	0.901179	1.10566	0.15433	-0.168923	0.807825	-1.07126	0.248206	0.54118	0.601596	0.519111	0.487744	-2.34067	0.0225566	0.341939	0.749098	2.29684	0.0442295	3.45787	0.0145831	-1.24703	0.286042	0.0392341	0.960911	3.18939	0.000946956	1.4476	0.11045	2.12792	0.0313417	2.38661	0.0175095	-0.705846	0.330643	0.558345	0.448941	0.848722	0.387243	1.9549
mevalonate	-0.479972	0.828155	0.503154	0.685246	-0.247146	0.835223	-0.379439	0.521406	0.812568	0.0699424	-0.111496	0.871766	-2.34413	0.0114399	-1.2482	0.0102879	0.323929	0.521116	-2.24359	0.0210012	-0.938785	0.0627671	0.459578	0.252033	-2.7108	0.00465108	-4.55158	4.9594e-06	-5.56093	1.13431e-05	-2.96644	0.00306435	-3.82409	3.51338e-05	-5.58374	1.09135e-07	-5.05493	6.34079e-09	-5.79978	5.96427e-09	-5.237	9.02354e-09	-5.21003	6.82599e-07	-4.76288	1.9171e-07	-5.12416	6.66177e-07	-1.84078
mevalonolactone	-0.294573	0.895249	0.39896	0.740822	-0.187384	0.86494	-0.430301	0.521406	0.879142	0.0699424	0.289861	0.680647	-1.9867	0.0178833	-1.40067	0.0243181	-0.109983	0.883427	-2.12243	0.0247984	-0.920487	0.0284938	0.367261	0.260397	-2.41654	0.00399457	-3.91822	4.06866e-05	-4.81769	6.78908e-05	-2.59846	0.00517594	-3.4066	4.02358e-05	-4.89242	2.81898e-07	-4.40324	4.66516e-07	-5.31888	1.30638e-07	-4.92767	8.68474e-07	-4.72089	1.95266e-06	-4.32708	6.66498e-08	-4.52516	4.32903e-07	-1.50167
3-hydroxy-3-methylglutarate	0.201871	0.851448	0.671491	0.291925	0.20662	0.906028	0.0495516	0.93847	0.403287	0.205231	0.264255	0.823517	-0.56881	0.203542	-0.282392	0.390824	0.85526	0.385397	-0.721129	0.249544	-0.550596	0.0567998	0.912895	0.226226	-3.42196	5.52482e-05	-2.76809	2.20391e-05	-3.48922	0.00160611	-2.97452	3.88894e-05	-1.85103	6.99966e-05	-3.03702	6.16578e-05	-3.99077	1.98558e-08	-3.05048	4.21193e-07	-2.63396	6.56895e-06	-3.69565	3.26598e-05	-2.40162	1.08439e-07	-2.12413	0.00191184	0.653875
N,N-dimethyl-pro-pro	0.698704	0.405143	0.282268	0.752447	0.529527	0.749625	1.90774	0.0735862	2.1236	0.000142155	0.837191	0.641474	-2.75151	6.23472e-05	-3.24344	6.06844e-06	-1.69712	0.138435	-1.54247	0.0151079	-1.40211	0.00657459	-1.38946	0.107317	-3.1145	2.61969e-05	-2.15673	7.56097e-06	-2.95314	0.00190154	-2.80044	4.86169e-05	-2.25911	0.000438357	-2.80826	3.68623e-08	-5.866	1.19327e-09	-5.40017	6.31115e-09	-4.65026	1.23827e-05	-4.34292	3.67848e-06	-3.66123	2.08083e-09	-4.19772	0.000277976	0.957765
acetylcholine	0.173793	0.927803	0.240159	0.963302	-0.65738	0.755731	1.19771	0.508179	1.39622	0.321022	0.21253	0.880264	-4.68311	1.55724e-05	-2.72591	0.0663353	2.24498	0.0912056	-3.6592	0.00527778	-1.56985	0.324102	3.11489	0.000328207	-1.86379	0.000264195	-3.42637	0.0199763	-6.45552	0.000193653	-1.00954	0.121591	-2.50575	0.0750513	-6.43243	2.41058e-09	-6.54691	3.49017e-07	-6.15228	1.83117e-06	-4.21053	2.23768e-05	-4.66874	0.000124826	-4.0756	0.000467257	-3.31754	5.65592e-05	-1.56258
quinolinate	-0.57202	0.606539	0.584409	0.409972	0.129508	0.863408	-0.101352	0.521406	-0.154508	0.865663	-1.34526	0.485764	-1.80161	0.00304426	0.397797	0.488552	1.37432	0.267183	-1.33095	0.0208751	-0.34112	0.432515	-0.10045	0.767953	1.90297	0.00170613	0.0884435	0.387957	0.112599	0.339103	1.33095	0.0155471	0.672853	0.0795264	0.242107	0.39237	0.101352	0.362714	0.486241	0.373574	1.48692	0.0787209	-2.80867e-16	0.361953	0.331732	0.185405	0.141657	0.186819	-1.81452
nicotinate ribonucleoside	0.010935	0.99316	0.0697777	0.985742	0.585743	0.825287	0.985479	0.380203	1.24309	0.0368927	0.17425	0.883494	-1.8216	0.00571207	-0.434554	0.670623	0.648228	0.511265	-0.847056	0.216436	0.738761	0.408512	0.236735	0.77447	-1.90407	0.00943919	-3.14044	0.013436	-4.33006	0.00143114	-2.43217	0.00303618	-3.6097	0.00591209	-4.28335	0.000328881	-3.72567	1.16053e-05	-3.575	6.12706e-05	-3.68183	3.75394e-05	-3.27923	0.00101622	-2.87094	0.000321529	-4.04662	0.000295189	-1.23637
nicotinic acid mononucleotide (NaMN)	0.123574	0.971884	1.29664	0.113928	-0.673855	0.696003	-0.0863851	0.916041	1.25229	0.182514	0.606987	0.816328	-0.209776	0.748283	-0.771477	0.179187	-1.10638	0.222345	-0.419735	0.609564	-0.81583	0.169299	0.174461	0.891371	-4.18227	0.000229236	-5.39307	1.13703e-06	-5.65308	8.92564e-05	-4.30969	0.000113236	-4.34742	3.58994e-06	-6.57793	6.84418e-08	-4.39205	1.12063e-08	-6.16455	5.27513e-07	-6.75946	2.9729e-08	-4.72942	3.31349e-05	-5.16325	3.37539e-06	-6.40347	0.000330309	-1.2108
nicotinamide riboside	-0.0687141	0.978888	-0.00527553	0.996242	-0.0408854	0.974219	1.26266	0.12655	0.793381	0.0955531	0.0486835	0.965738	-2.84322	2.20625e-05	-1.22837	0.0451307	-0.422889	0.561069	-1.51184	0.0414956	-0.429714	0.536674	-0.333321	0.372014	-2.10647	0.000179449	-3.06122	0.000741016	-3.54041	0.000725884	-2.55287	0.00214462	-3.44419	0.00117893	-3.95899	7.16698e-06	-4.94968	9.49821e-07	-4.28959	9.19701e-07	-3.9633	1.26058e-05	-4.06472	1.23078e-05	-3.8739	6.04076e-06	-4.29231	2.09991e-06	-0.95475
nicotinamide ribonucleotide (NMN)	-0.245421	0.619521	0.188632	0.805259	-0.786205	0.696003	-0.171653	0.569434	0.473869	0.300715	-0.176611	0.880264	-1.92052	3.77134e-05	-1.61334	0.000803575	-0.441316	0.521966	-1.84675	0.000602929	-1.3281	0.00407685	0.168278	0.798063	-1.705	7.00903e-05	-2.60273	4.41497e-06	-4.05814	9.94302e-05	-1.64516	0.000189889	-2.10884	0.000160393	-4.53908	3.7206e-06	-3.62552	9.55232e-11	-4.21607	1.33396e-07	-4.49945	4.96255e-07	-3.49191	8.04566e-07	-3.43694	2.41834e-07	-4.37081	1.33251e-05	-0.897733
trigonelline (N'-methylnicotinate)	-0.0531637	0.980205	-0.431708	0.685246	0.563791	0.768957	0.152226	0.698077	-0.00566908	0.98533	0.321127	0.801892	-0.396715	0.353761	-0.821585	0.049671	0.0170391	0.978995	-0.191325	0.588195	-0.395546	0.201512	-0.225625	0.772441	-0.251916	0.721465	0.142702	0.825851	-0.390808	0.6116	-0.339443	0.600122	-0.323368	0.654174	0.138621	0.872665	-0.648631	0.250942	-0.678883	0.241211	-0.373768	0.543636	-0.530768	0.389941	-0.718914	0.243211	-0.087004	0.916107	0.394619
NADHX*	-2.80867e-16	0.606539	-2.80867e-16	0.685246	9.99201e-16	0.696003	0.0428755	0.521406	-2.80867e-16	0.501799	0.0309596	0.641474	-2.80867e-16	0.383678	-2.80867e-16	0.390824	9.99201e-16	0.436492	0.0428755	0.410238	-2.80867e-16	0.408512	0.0309596	0.419685	-0.617154	0.173763	-0.617154	0.179166	-0.617154	0.242373	-1.7726	0.000376825	-1.7726	0.000493298	-1.7726	0.000253761	-0.617154	0.1601	-0.617154	0.167046	-0.617154	0.168395	-1.72972	0.00026161	-1.7726	0.000201345	-1.74164	0.000257933	-2.80867e-16
nicotinate	0.0958559	0.816418	-0.462743	0.282483	0.425893	0.732273	-0.337195	0.464591	-0.0949565	0.754332	-0.441624	0.641474	-1.33021	0.00102349	-1.09377	0.00152075	-1.07807	0.173799	-1.76326	8.00044e-06	-0.725988	0.01098	-1.94559	0.000432027	0.254931	0.389019	0.795783	0.0278402	0.69697	0.195771	0.811002	0.241277	0.793255	0.274132	1.58308	0.038271	-1.07527	0.00484062	-0.297992	0.241211	-0.381102	0.328532	-0.952255	0.158523	0.0672671	0.922226	-0.36251	0.612194	0.540852
nicotinamide	0.406446	0.414554	0.215467	0.927752	0.879624	0.696003	0.0434	0.951225	0.816492	0.135703	0.555273	0.641474	-0.608364	0.219933	-0.791656	0.255034	-1.336	0.209266	-0.971411	0.0588861	-0.19063	0.668402	-1.66035	4.28912e-05	-1.30367	0.000376646	-1.02902	0.111603	-0.530389	0.397739	-1.60492	0.000239051	-1.52125	0.00484704	-0.358463	0.028518	-1.91203	0.00179051	-1.82068	0.000298143	-1.86639	0.00223621	-2.57633	0.000135641	-1.71188	6.12068e-05	-2.01881	7.73426e-06	0.274646
NAD+	2.93585	0.0644324	1.15155	0.18845	-0.477987	0.835223	0.649305	0.553145	1.09852	0.135703	-0.135638	0.982354	0.627249	0.376248	-1.53824	0.0104733	0.422458	0.699547	-1.6593	0.128022	-1.59128	0.0106639	0.764807	0.539041	-6.57261	1.70656e-05	-4.19866	7.56097e-06	-6.58744	4.04723e-05	-3.69944	0.000239051	-3.10979	5.15626e-05	-7.12811	2.07993e-06	-5.94536	7.83869e-08	-5.7369	2.51876e-07	-6.16498	6.67806e-06	-5.35874	8.01703e-05	-4.70107	9.50584e-07	-6.3633	0.00022641	2.37395
UDP-galactose	-0.0139747	0.99316	1.05644	0.685246	-0.134552	0.696003	1.50217	0.463269	0.971525	0.501799	0.859894	0.641474	-1.46204	0.0443012	-1.19702	0.151665	-0.134552	0.436492	0.0541	0.959251	-1.28193	0.32282	0.859894	0.419685	-4.46658	0.000128837	-5.0166	0.000256297	-6.07906	6.72131e-07	-4.34312	0.000250937	-3.82273	0.00252672	-6.07619	7.16927e-07	-5.92862	3.28696e-08	-6.21362	2.35051e-09	-6.21362	4.32666e-09	-4.28902	0.00159282	-5.10466	0.000523104	-5.2163	0.000877604	-0.550021
UDP-glucose	0.556746	0.67148	1.1307	0.685246	-0.198081	0.696003	1.53941	0.478409	1.14527	0.41638	0.88956	0.648175	-1.14483	0.154279	-1.19443	0.175118	-0.17032	0.515605	-0.162172	0.870324	-1.17986	0.372424	0.91732	0.419685	-4.61157	0.000153868	-5.04005	0.000330631	-6.11073	1.3872e-06	-4.19462	0.000155582	-4.04915	0.00248238	-6.44861	9.33999e-07	-5.7564	4.42388e-07	-6.23448	4.06308e-09	-6.28105	4.32666e-09	-4.3568	0.00159282	-5.22901	0.000503542	-5.53129	0.000942546	-0.428476
UDP-N-acetylglucosamine/galactosamine	0.529954	0.843816	-0.190685	0.951979	-0.0716922	0.974219	0.721511	0.572277	1.1854	0.177342	0.507078	0.699366	-1.96039	0.0865375	-3.10995	0.00247668	-2.37048	0.0986781	-1.76883	0.178043	-1.73386	0.0183905	-1.79171	0.0454466	-3.61576	0.00351139	-2.73138	0.00399056	-3.96642	0.00314256	-2.3188	0.038551	-2.15506	0.00750878	-3.27111	0.00131214	-5.57615	2.47672e-05	-5.84133	3.84124e-06	-6.3369	9.25093e-06	-4.08763	0.000947506	-3.88892	0.000154545	-5.06282	4.98945e-05	0.884379
acetylphosphate	0.0993655	0.992404	2.24267	0.269997	0.513791	0.772302	1.07227	0.508179	3.32531	0.0500155	0.172102	0.985746	0.835875	0.50484	-0.547278	0.521736	2.23443	0.107459	1.80878	0.271365	0.535366	0.677323	1.89274	0.330951	2.07499	0.152653	0.426752	0.652818	-1.42747	0.125519	0.900919	0.489936	1.39599	0.119404	-2.18712	0.000794636	2.91086	0.00140914	-0.120527	0.866173	0.806955	0.379442	2.7097	0.00542819	1.93135	0.0680484	-0.294377	0.869736	-1.64824
phosphate	-0.164247	0.606539	-0.33349	0.144477	-0.271029	0.696003	-0.351388	0.12655	0.0700137	0.699432	-0.235488	0.595431	-1.34358	2.11649e-05	-0.994176	0.000102111	-0.79372	0.0568583	-1.53072	6.21196e-05	-0.590673	0.00214785	-0.758178	0.000504384	-0.640362	0.000476408	-0.736422	9.47554e-05	-0.92359	0.00306088	-0.994517	0.000174595	-1.25982	1.25054e-05	-1.38453	2.29863e-06	-1.98394	8.25753e-08	-1.7306	4.01671e-07	-1.71731	6.86833e-06	-2.52523	3.07381e-08	-1.85049	1.76203e-07	-2.14271	1.58228e-07	-0.0960601
pantetheine	-0.105688	0.991705	0.641227	0.84925	-6.66134e-16	0.696003	0.378119	0.521406	0.469187	0.501799	0.476612	0.665686	-3.57593	0.00275322	-2.22289	0.0116833	0.034525	0.538758	-3.09212	0.0494867	-2.39493	0.0919167	0.511137	0.419685	-6.00799	0.000206783	-7.36102	2.2371e-05	-9.58392	3.06073e-07	-6.2372	0.00124046	-6.84332	0.000590229	-9.70744	2.04983e-08	-9.58392	2.14565e-09	-9.58392	3.12651e-09	-9.54939	6.43227e-09	-9.32932	3.47037e-07	-9.23825	6.59527e-07	-9.1963	1.80283e-06	-1.35304
phosphopantetheine	0.031567	0.99316	0.217135	0.685246	-6.66134e-16	0.696003	5.61733e-16	0.521406	5.61733e-16	0.501799	5.61733e-16	0.641474	-0.739515	0.259699	5.61733e-16	0.390824	-6.66134e-16	0.436492	-0.771082	0.228558	-0.217135	0.408512	5.61733e-16	0.419685	-5.58833	4.33849e-05	-6.32785	1.95097e-09	-6.32785	6.26056e-08	-5.33886	4.24423e-05	-5.8928	1.39431e-06	-6.10994	2.41058e-09	-6.32785	2.5705e-10	-6.32785	3.30493e-10	-6.32785	7.74007e-10	-6.10994	3.08103e-09	-6.10994	1.52964e-09	-6.10994	4.4939e-09	-0.739515
CoA	0.468355	0.843816	0.206486	0.685246	0	NA	5.61733e-16	0.521406	5.61733e-16	0.501799	5.61733e-16	0.641474	-0.648006	0.329584	5.61733e-16	0.390824	0	NA	-1.11636	0.255215	-0.206486	0.408512	5.61733e-16	0.419685	-5.49907	5.32562e-05	-6.14708	3.07352e-08	-6.14708	3.63783e-07	-4.457	0.00116805	-5.36687	1.94877e-06	-5.57336	2.93832e-08	-6.14708	2.72404e-09	-6.14708	3.91144e-09	-6.14708	7.29662e-09	-5.57336	2.84607e-08	-5.57336	1.39276e-08	-5.57336	3.85767e-08	-0.648006
pantoate	-0.375406	0.520805	-0.704423	0.44421	0.277264	0.841296	0.105195	0.882392	-0.511282	0.110797	-0.617453	0.613383	-3.18542	3.76122e-05	-1.85455	0.00101985	-1.63076	0.0797379	-2.70482	0.000745107	-1.66141	0.00207809	-2.52547	0.00046711	-1.09	0.00119146	-0.916489	0.0324004	-1.21422	0.0517285	-1.45609	0.00176484	-1.6116	0.00223929	-0.927644	0.00202743	-4.27542	1.0028e-06	-2.77104	2.5841e-07	-2.84497	1.34502e-05	-4.16091	1.14636e-05	-3.27301	1.71818e-06	-3.45312	4.27719e-05	0.173508
pantothenate (Vitamin B5)	-0.10806	0.891224	-0.210015	0.704225	0.0314339	0.967331	-0.34078	0.528795	-0.35793	0.08686	-0.26018	0.71792	-2.03511	0.000253777	-1.5404	0.000514069	-1.04112	0.0873849	-2.26783	0.000887048	-1.68831	4.22137e-06	-1.33274	0.00593183	-2.5955	4.76965e-05	-2.14183	0.000105834	-2.33877	0.000890074	-2.2135	2.54723e-05	-1.86178	1.4233e-06	-1.81728	2.23538e-07	-4.63061	6.90765e-08	-3.68223	4.24375e-08	-3.3799	6.64204e-07	-4.48133	2.26143e-06	-3.5501	7.08688e-09	-3.15001	1.60431e-05	0.453667
branched-chain, straight-chain, or cyclopropyl 12:1 fatty acid*	-0.31	0.606539	1.21855	0.685246	-0.0245625	0.988363	0	NA	-0.0461762	0.501799	-0.202632	0.641474	-0.31	0.383678	-0.75738	0.420257	-3.42307	0.00547129	0	NA	-2.0221	0.0815158	-3.60114	8.6512e-06	0.0421367	0.930939	0.535693	0.578794	3.35784	0.00192868	-0.638312	0.392956	1.38379	0.304484	2.96282	0.00401656	-0.267863	0.362714	-0.221687	0.46233	-0.0652309	0.863956	-0.638312	0.361953	-0.638312	0.375707	-0.638312	0.387243	0.493557
arabitol/xylitol	0.19535	0.843816	0.373448	0.685246	0.356442	0.835223	1.14023	0.435667	1.11097	0.020522	0.449913	0.788903	-3.07655	9.15312e-06	-3.5885	3.58337e-05	-1.15681	0.227239	-2.13166	0.0278647	-2.85098	7.86155e-05	-1.06334	0.234465	-1.1591	0.00278391	-1.22795	0.00972352	-3.32938	0.00149101	-1.8897	0.00143536	-1.78045	0.0002949	-3.89889	3.46367e-07	-4.23565	1.70254e-08	-4.81645	4.24141e-08	-4.48619	1.04372e-06	-4.02136	0.000284804	-4.63143	1.57967e-07	-4.96223	0.000134541	-0.0688505
ribulose/xylulose	-0.784104	0.3745	-1.02657	0.348001	-1.03398	0.696003	0.230895	0.772193	0.352328	0.69047	-0.0968294	0.951594	-2.207	0.00520158	-2.6616	0.000488439	-1.2822	0.173332	-1.19201	0.0175765	-1.2827	0.117062	-0.345052	0.627205	3.54552	2.36563e-05	3.09004	2.2371e-05	1.8113	0.0146091	1.99884	0.011804	1.3009	0.111033	0.0147515	0.986257	1.33851	0.0163234	0.428449	0.197788	0.529101	0.0838657	0.806835	0.191372	0.0182043	0.984744	-0.3303	0.668441	-0.455472
ribitol	-0.113717	0.843816	-0.219205	0.719405	0.133611	0.915295	0.370318	0.589909	0.334692	0.321022	0.13537	0.880264	-2.43044	1.53883e-05	-1.99037	0.000129189	-1.17934	0.18768	-1.9464	0.00690697	-1.43648	0.000504234	-1.17758	0.0161867	0.159275	0.412776	-0.307277	0.152265	-0.963642	0.133812	-0.615739	0.0134506	-1.18778	0.00103735	-1.49133	5.62731e-06	-2.27116	3.87023e-07	-2.29765	2.49213e-06	-2.14298	1.65937e-05	-2.56214	0.000581142	-2.62425	1.20294e-07	-2.66891	7.2031e-05	-0.466552
ribose	-0.538896	0.520805	-1.03479	0.1672	-0.01958	0.988363	0.151028	0.690315	-0.0786709	0.812363	-0.613238	0.401676	-3.00048	1.30453e-06	-2.46679	0.000162076	-1.44844	0.049994	-2.31056	0.00212738	-1.51067	0.00160618	-2.0421	0.00046711	1.4163	0.000917051	1.06595	0.0291829	0.544749	0.266322	1.1897	0.11277	0.34346	0.580512	0.837465	0.180155	-1.58419	0.000676902	-1.40084	0.0014294	-0.903692	0.0385235	-1.12086	0.0654649	-1.16721	0.0531732	-1.20463	0.0472176	-0.350345
ribonate	0.0453618	0.969666	0.237294	0.735367	0.400864	0.811167	0.555133	0.521406	0.34188	0.383444	-0.159933	0.886677	-3.32923	6.18726e-05	-1.86209	0.000380754	-0.555604	0.463935	-2.81946	0.00136133	-1.75751	0.000311581	-1.1164	0.0831048	-2.34625	4.63212e-05	-2.52129	5.00176e-05	-3.19199	0.00121983	-2.33538	9.43106e-06	-2.31849	3.58994e-06	-2.82562	2.93832e-08	-5.67548	1.76155e-07	-4.38338	1.01109e-08	-3.74759	1.74612e-07	-5.15484	9.96399e-06	-4.076	1.3151e-07	-3.94202	6.10103e-05	-0.17504
arabonate/xylonate	-0.243443	0.597239	-0.0807765	0.963302	0.230767	0.89409	0.702957	0.521406	0.431768	0.346698	0.360359	0.822738	-4.09503	9.49787e-06	-3.43031	0.00012746	-2.08006	0.104331	-3.14863	0.000867042	-2.91777	2.31958e-05	-1.95047	0.0225566	-1.53826	0.000804382	-0.704316	0.151695	-2.20094	0.0290142	-2.20173	2.82436e-05	-1.20512	0.00168209	-2.3902	2.48109e-06	-5.63329	7.24318e-07	-4.13463	3.05212e-06	-4.281	1.15583e-05	-5.35036	9.09723e-06	-4.12288	3.14247e-08	-4.34066	0.000128058	0.833946
sedoheptulose	0.16294	0.96204	0.0698211	0.959514	0.604481	0.696003	1.21151	0.380869	1.15362	0.186089	-0.317364	0.871766	-1.71971	0.00366279	-1.86862	4.09121e-12	-0.741896	0.542411	-0.671149	0.550571	-0.784825	0.282664	-1.66374	0.00952427	2.21019	5.75502e-05	1.86862	4.12916e-12	1.59564	0.0197245	1.86737	0.119133	1.43269	0.0648713	1.69437	0.0170948	0.490472	0.159925	0	NA	0.853747	0.235665	1.19622	0.15335	0.64786	0.414225	0.0306242	0.97158	-0.341563
ribulonate/xylulonate/lyxonate*	1.1406	0.606539	1.20985	0.214985	0.715894	0.793437	0.689933	0.662631	1.87371	0.0683326	0.73192	0.822316	-0.980869	0.383678	-3.8866	5.02558e-05	-0.643928	0.677197	-1.43154	0.30176	-3.22274	0.00243598	-0.627902	0.659443	-2.22226	0.0390454	0.0989953	0.881856	-2.47131	0.0378168	-1.77701	0.0619958	0.613491	0.0971117	-2.45077	0.000384355	-3.20313	0.00291293	-3.78761	3.47021e-05	-3.11524	0.00650847	-3.20855	0.00631751	-2.60925	0.00325536	-3.07867	0.0318687	2.32126
sedoheptulose-7-phosphate	2.48	0.340618	1.02662	0.451542	-0.138245	0.890855	0.295609	0.676521	3.12645	0.108977	0.0126989	0.997711	3.27494	0.00285421	-1.6451	0.179187	2.39594	0.18768	1.09055	0.410238	0.454735	0.607529	2.54689	0.0500878	0.919499	0.250542	2.27965	0.000747234	-1.19958	0.0146746	3.73276	0.0109638	3.63952	0.000395463	-1.00457	0.00477724	4.19444	3.49268e-07	0.634551	0.527905	1.19636	0.279313	4.82331	7.95103e-06	4.09426	0.000181113	1.54232	0.154355	1.36015
phenylalanine	0.484027	0.0619846	0.593805	0.161806	1.48771	0.210779	0.0723079	0.811194	1.00332	0.00474482	0.631501	0.641474	-1.73139	8.3364e-06	-2.06688	0.000103636	-0.812658	0.383393	-2.14311	5.66821e-05	-1.65736	3.15636e-06	-1.66887	0.0026284	-1.28733	2.75892e-05	-1.1729	0.000847262	-2.49016	0.00160611	-1.02033	2.54723e-05	-0.796124	6.5167e-05	-1.21948	6.08735e-06	-3.01872	3.20404e-08	-3.23978	2.02558e-07	-3.30282	4.89087e-05	-3.16344	3.33569e-07	-2.45349	3.72836e-09	-2.88835	3.32211e-05	0.114426
N-acetylphenylalanine	-0.0622654	0.96204	-0.163328	0.886256	1.0949	0.541075	0.115504	0.721171	-0.117048	0.772304	0.212249	0.791673	-2.43835	8.20698e-06	-2.7159	0.00038213	-1.48224	0.110301	-2.26058	0.000746188	-2.66962	1.64474e-05	-2.36489	2.83196e-05	-1.41606	0.00355863	-0.712751	0.166186	-1.40025	0.050326	-1.7946	0.000796976	-1.19235	0.000218683	-0.621629	0.00313695	-3.85441	1.62601e-06	-3.42865	1.53516e-05	-2.88249	0.00018142	-4.05518	2.82934e-07	-3.86197	6.40446e-08	-2.98651	6.6232e-07	0.70331
phenyllactate (PLA)	-0.257879	0.448029	-0.109855	0.853762	0.25905	0.854686	1.68502	0.394682	0.745718	0.0547547	0.189044	0.880264	-2.71952	4.95544e-06	-2.99492	1.23711e-05	-1.54758	0.0832581	-0.776624	0.436477	-2.13935	3.17047e-05	-1.61758	0.0197579	-0.452473	0.0467176	0.456485	0.0426214	-0.0253766	0.967043	-2.25171	5.80849e-06	-1.19473	0.000708527	-1.30769	3.99173e-05	-3.17199	6.90765e-08	-2.53844	5.08739e-06	-1.57296	0.000257682	-3.02834	0.00941451	-3.33408	6.76807e-08	-2.92527	0.000409684	0.908957
4-hydroxyphenylacetate	-2.31458	0.141643	-2.57784	0.0670999	-1.62091	0.040198	2.80867e-16	0.521406	2.80867e-16	0.501799	2.80867e-16	0.641474	-3.20253	0.000104127	-4.66813	2.16274e-06	-5.65069	1.08753e-05	-0.887946	0.268978	-2.09029	0.0131832	-4.02978	4.06585e-07	-1.47177	0.0131928	-0.00617742	0.99006	0.976382	0.0295408	-0.142922	0.873973	1.05942	0.243535	2.99891	0.000513305	-4.6743	3.68964e-08	-4.6743	4.89442e-08	-4.6743	1.02432e-07	-1.03087	0.0674795	-1.03087	0.0687437	-1.03087	0.0727914	1.4656
phenylacetate	-1.25343	0.162188	-2.69667	0.0286501	-0.345547	0.792472	-2.80867e-16	0.521406	-2.80867e-16	0.501799	-2.80867e-16	0.641474	-1.41013	0.00984306	-3.63746	5.5984e-05	-3.97007	0.000235481	-0.156703	0.410238	-0.940789	0.0307318	-3.62452	6.14874e-06	-0.911785	0.0649061	1.31555	0.0153249	1.64815	0.00370417	0.153773	0.400414	0.937859	0.0268429	3.62159	7.52759e-07	-2.32192	1.00293e-07	-2.32192	1.33396e-07	-2.32192	2.56532e-07	-0.0029304	0.361953	-0.0029304	0.375707	-0.0029304	0.387243	2.22733
1-palmitoyl-2-oleoyl-GPA (16:0/18:1)	-0.0664589	0.980205	-0.227	0.685246	0.599457	0.696003	0.490512	0.508179	-0.38779	0.529101	-0.271351	0.82479	-1.20319	0.0208992	-1.53792	0.00251526	0.24738	0.699069	-0.64622	0.268978	-1.69871	0.00435396	-0.623428	0.30041	-1.82795	0.000922249	-0.564305	0.044571	-1.64099	0.000137573	-1.14525	0.0712712	-0.0421438	0.911804	-0.292371	0.525483	-3.03114	1.39917e-06	-2.10222	3.28397e-05	-1.39361	0.00763926	-1.79147	0.00135417	-1.74085	0.00687808	-0.915798	0.0998721	1.26365
1,2-dilinoleoyl-GPA (18:2/18:2)*	0.0695512	0.968958	-0.0393127	0.963302	0.818874	0.604744	0.0566941	0.521406	0.0148655	0.759061	-0.0291386	0.986174	-1.97315	0.000136335	-3.37183	3.34932e-06	-2.29733	0.00346269	-1.98601	0.00101059	-3.31765	2.4793e-06	-3.14534	0.000118	-2.77354	5.09545e-05	-1.3625	0.00104101	-2.02814	0.00101939	-2.48594	0.00294795	-1.18377	0.044472	-0.991225	0.0835201	-4.74669	3.45896e-09	-4.73434	5.3139e-09	-4.32547	3.6929e-07	-4.47195	1.26667e-05	-4.50143	1.07664e-05	-4.13657	6.27538e-05	1.41104
1,2-dipalmitoyl-GPC (16:0/16:0)	-0.554101	0.616726	0.605448	0.617477	0.723897	0.696003	-0.676027	0.508179	-0.275425	0.783052	-0.36475	0.613383	0.322565	0.582544	0.485108	0.288107	0.96592	0.0308277	0.200639	0.710808	-0.395765	0.627493	-0.122727	0.793296	-4.11338	0.000109013	-4.39409	8.63765e-06	-4.70462	3.5861e-06	-4.41414	0.000960784	-3.53531	0.00354027	-3.72738	0.00156141	-3.79081	2.43762e-06	-3.90898	1.52269e-06	-3.7387	7.73315e-07	-4.2135	0.000611036	-3.93107	0.00280346	-3.85011	0.000784613	-0.280714
1-myristoyl-2-palmitoyl-GPC (14:0/16:0)	-0.380781	0.843816	0.0272484	0.985742	0.331362	0.845844	-0.908914	0.304926	-0.600522	0.527911	-0.48494	0.485764	2.71305	0.00522089	2.17984	0.000854199	2.86451	0.00278526	2.18491	0.0106623	1.55207	0.0945165	2.04821	0.00593183	-3.12831	0.00173719	-2.56758	9.65764e-05	-3.30662	0.000417722	-3.24306	0.0023983	-2.27429	0.01029	-2.70922	0.00316376	-0.415264	0.172923	-0.387735	0.23864	-0.442101	0.0502668	-1.05814	0.107256	-0.722222	0.384816	-0.661005	0.272142	0.560735
1-palmitoyl-2-arachidonoyl-GPC (16:0/20:4n6)	-0.401013	0.851448	0.0262706	0.994918	-1.3181	0.696003	0.291458	0.521406	-0.02023	0.988217	0.0196668	0.990811	-1.32905	0.0767399	-1.65048	0.232561	0.50483	0.698947	-0.636578	0.447675	-1.69698	0.234686	1.8426	0.00635954	-5.68061	7.68253e-05	-4.60079	0.00414973	-5.69155	0.000549686	-6.11916	0.00019274	-4.61206	0.00651775	-7.0472	9.57738e-07	-7.00966	8.47982e-09	-6.25127	4.35245e-06	-5.18672	2.2454e-05	-6.75574	3.47662e-06	-6.30904	2.44398e-05	-5.20459	4.94734e-05	1.07982
1-myristoyl-2-arachidonoyl-GPC (14:0/20:4)*	-0.343419	0.869881	0.0248603	0.994494	-0.927158	0.696003	0.0380418	0.521406	0.458751	0.575066	-0.693544	0.641474	-0.881812	0.234556	-1.25492	0.140314	1.2543	0.200367	-0.500352	0.440972	-0.821027	0.535545	1.48792	0.0450855	-6.71026	4.23919e-05	-6.04442	9.21621e-05	-6.66492	5.25004e-05	-7.29817	3.72141e-05	-6.26405	0.00108761	-7.83656	2.58681e-07	-7.59207	7.31256e-09	-7.29934	5.94049e-08	-5.41062	4.01915e-06	-7.79852	2.14898e-07	-7.08507	9.12431e-06	-6.34865	2.39348e-05	0.665843
1-stearoyl-2-oleoyl-GPC (18:0/18:1)	-0.0116267	0.99316	0.165212	0.917294	0.736151	0.696003	-0.0175028	0.971269	-0.683115	0.467201	-0.576925	0.348972	0.294803	0.603043	0.405429	0.389569	1.67249	0.0105264	0.288927	0.718345	-0.442899	0.503417	0.359412	0.407862	-2.81383	0.000745931	-1.46599	0.00526646	-2.14265	0.00160907	-2.08492	0.0203634	-0.560239	0.299404	-0.665967	0.134712	-2.51902	4.4688e-05	-1.06056	0.00894315	-0.470164	0.0461129	-1.79599	0.00729238	-1.00314	0.116167	-0.306554	0.462104	1.34784
1-palmitoleoyl-2-linolenoyl-GPC (16:1/18:3)*	0.187056	0.947445	0.6713	0.544685	1.12189	0.661058	0.933449	0.508179	-0.224692	0.806574	-0.810906	0.267954	-2.77122	0.00120946	-2.3717	0.00122554	-0.742975	0.287824	-2.02482	0.0702162	-3.26769	0.00199728	-2.67577	0.00045894	-3.93406	6.68644e-05	-2.2988	0.000536457	-3.18267	0.000890415	-4.08476	0.00121108	-1.96525	0.00329582	-2.39854	0.000366667	-6.70528	1.98436e-07	-4.6705	1.29744e-06	-3.92565	3.1688e-07	-6.10958	8.37988e-06	-5.23294	2.7871e-05	-5.07431	3.07374e-06	1.63526
1-linoleoyl-2-linolenoyl-GPC (18:2/18:3)*	0.593465	0.750167	0.511742	0.685246	1.38864	0.522421	0.836692	0.521406	-0.128291	0.899207	-0.514615	0.619495	-3.46437	0.00029731	-3.12152	0.000786102	-1.60566	0.0735998	-3.22114	0.0128716	-3.76156	0.000545224	-3.50892	0.000168204	-3.70812	8.09412e-05	-2.0914	0.0023613	-2.78958	0.00296898	-3.57784	0.00346279	-2.04284	0.00104576	-1.86411	0.000502574	-7.17249	2.57045e-07	-5.21292	2.70988e-06	-4.39524	3.24897e-07	-6.79898	2.27025e-06	-5.80439	8.05312e-06	-5.37303	3.80354e-06	1.61672
1,2-dilinolenoyl-GPC (18:3/18:3)*	1.14959	0.491368	1.10436	0.24464	2.03168	0.146462	0.469677	0.380203	0.871079	0.178324	-0.177604	0.886161	-2.21243	0.000546446	-3.79308	4.00898e-05	-1.76229	0.0311726	-2.89234	0.0102333	-4.02636	0.000135318	-3.97158	0.000704309	-3.46466	6.68644e-05	-1.75586	0.00208758	-2.70089	0.0010213	-3.48587	0.00346279	-1.8223	0.00457395	-1.84001	0.00403957	-5.67709	1.86776e-09	-5.54894	3.94006e-08	-4.46319	2.72418e-07	-6.37821	6.01321e-07	-5.84866	2.61828e-06	-5.81159	2.02733e-05	1.7088
1-palmitoyl-2-palmitoleoyl-GPC (16:0/16:1)*	-0.011701	0.99316	0.271089	0.778771	0.524535	0.696003	-0.100655	0.90034	-0.734032	0.427897	-0.766184	0.180832	-0.00624232	0.990252	0.308501	0.447614	1.06704	0.0873849	-0.0951966	0.911666	-0.696621	0.287046	-0.223682	0.538251	-3.20159	0.000288144	-1.84006	0.000247868	-2.03361	0.00197291	-3.20531	0.00201462	-1.56099	0.00484704	-1.50109	0.00159425	-3.20783	1.4739e-06	-1.53156	0.000619982	-0.966572	2.18408e-05	-3.3005	0.000340769	-2.25761	0.0022532	-1.72478	0.000567117	1.36153
1-palmitoleoyl-2-linoleoyl-GPC (16:1/18:2)*	-0.00945496	0.994834	0.126638	0.959514	0.675666	0.696003	0.226266	0.788606	-0.797517	0.399304	-1.06185	0.159707	-1.70148	0.0154284	-1.63974	0.0113213	-0.198759	0.770544	-1.46575	0.190935	-2.5639	0.00411816	-1.93627	0.000521488	-3.49602	0.000147239	-1.5047	0.00317028	-2.28705	0.00392954	-3.20461	0.00453668	-1.07719	0.0268108	-1.31051	0.00098469	-5.1975	1.73078e-07	-3.14444	1.80099e-05	-2.48581	2.78984e-07	-4.67036	1.73383e-05	-3.64109	6.40576e-05	-3.24678	2.04023e-06	1.99132
1,2-dilinoleoyl-GPC (18:2/18:2)	0.0892415	0.988849	0.111454	0.959514	0.856884	0.696003	0.346837	0.654762	-0.648663	0.501799	-0.813666	0.222184	-2.69175	0.00149657	-2.55434	0.000982344	-1.21046	0.145203	-2.43415	0.0412115	-3.31446	0.000838114	-2.88101	0.000105002	-3.43765	0.000110874	-1.40457	0.00406581	-1.99295	0.0103983	-3.29666	0.00530104	-1.24138	0.00819515	-1.08432	0.00157611	-6.1294	1.64568e-07	-3.95891	2.94678e-06	-3.20341	1.62902e-08	-5.73082	1.95266e-06	-4.55583	1.35924e-05	-3.96533	2.5194e-06	2.03307
1-oleoyl-2-linoleoyl-GPC (18:1/18:2)*	-0.0712452	0.989048	-0.0625928	0.963302	0.434447	0.696003	0.303608	0.690315	-0.875543	0.321022	-0.795676	0.159707	-1.84772	0.00950165	-1.5019	0.00590618	-0.237428	0.617159	-1.47287	0.152656	-2.31485	0.00489054	-1.46755	0.000800244	-2.87026	0.000328598	-0.73715	0.0139325	-1.24837	0.0104175	-2.44759	0.0112962	-0.305828	0.431519	-0.320003	0.184984	-4.71798	2.62995e-07	-2.23905	8.8468e-05	-1.48579	6.14958e-07	-3.92046	2.95306e-05	-2.62067	0.000446049	-1.78755	4.43181e-05	2.13311
1-palmitoyl-2-oleoyl-GPC (16:0/18:1)	-0.152221	0.961164	-0.0179402	0.988258	0.53615	0.696003	0.126304	0.87169	-0.75847	0.393087	-0.818897	0.159707	-0.368396	0.51452	-0.0233101	0.961981	0.788837	0.146805	-0.0898707	0.908686	-0.763839	0.219742	-0.56621	0.12789	-2.87438	0.000524005	-1.27113	0.00266863	-1.18971	0.0135459	-2.51206	0.00429215	-0.77453	0.102557	-0.139017	0.698882	-3.24278	1.18074e-06	-1.29444	0.00318718	-0.400874	0.00965878	-2.60193	0.00109174	-1.53837	0.0122738	-0.705227	0.0457858	1.60325
1,2-dipalmitoleoyl-GPC (16:1/16:1)*	-0.00108857	0.999463	0.215547	0.914297	0.482879	0.793437	0.226803	0.846026	-0.840131	0.41638	-1.03629	0.159707	-0.524435	0.389266	-0.607427	0.31895	0.87248	0.317067	-0.296543	0.790821	-1.66311	0.0474031	-0.646693	0.0884255	-4.13278	0.000141044	-1.93632	0.00456079	-3.00688	0.00292549	-3.51566	0.00350638	-1.10256	0.0469316	-1.90579	0.000158653	-4.65721	2.40407e-06	-2.54374	0.000274535	-2.1344	0.000133908	-3.81221	0.000604919	-2.76567	0.000835423	-2.55249	1.94174e-05	2.19646
1-stearoyl-2-oleoyl-GPE (18:0/18:1)	0.114449	0.96204	0.500682	0.61186	1.3274	0.696003	-0.305987	0.662604	-1.40422	0.215722	-0.724249	0.583055	0.56574	0.359316	2.98076	0.000729245	4.95393	0.000798328	0.145305	0.79816	1.07586	0.149275	2.90228	0.0427887	-2.74665	0.000636952	-2.9889	9.65764e-05	-4.58229	0.000221711	-2.46592	0.00152245	-2.32193	0.000681879	-3.0886	0.0149758	-2.18091	0.000295837	-0.00813626	0.985045	0.371643	0.162582	-2.32061	0.000881582	-1.24607	0.0811352	-0.186322	0.752468	-0.242246
1-palmitoyl-2-oleoyl-GPE (16:0/18:1)	0.0107422	0.99316	0.372977	0.685246	0.878735	0.779318	-0.0859073	0.90034	-1.27742	0.176189	-0.776736	0.358745	-0.317875	0.564733	2.26149	0.00100811	3.59288	0.000880342	-0.414524	0.484351	0.61109	0.332501	1.93741	0.093407	-2.95132	0.000349619	-2.90123	3.47933e-05	-3.89286	0.000190413	-2.32232	0.00131515	-1.90998	0.00113739	-2.39586	0.0235605	-3.2692	1.13193e-05	-0.639737	0.12167	-0.29998	0.144205	-2.73684	0.000237517	-1.29889	0.0327519	-0.458452	0.302606	0.0500975
1,2-dipalmitoleoyl-GPE (16:1/16:1)*	-0.158486	0.93937	0.762144	0.26908	0.408779	0.863408	0.0433426	0.954649	-1.35648	0.176189	-1.16406	0.16229	-0.100583	0.863942	1.75536	0.00492909	3.43256	0.000150935	0.101246	0.88419	-0.363271	0.546037	1.85972	0.0829626	-3.6716	0.000209662	-3.02241	1.28538e-05	-4.27223	1.30324e-05	-3.50347	0.000132406	-1.93365	0.000816827	-3.53684	0.00224542	-3.77218	3.1433e-06	-1.26706	0.0124339	-0.839676	0.00179705	-3.40222	0.000284804	-2.29692	0.00209836	-1.67712	0.00218478	0.649185
1,2-dipalmitoyl-GPE (16:0/16:0)*	-0.102201	0.961929	2.80867e-16	0.685246	-6.66134e-16	0.696003	-0.337088	0.492403	0.0709563	0.501799	2.80867e-16	0.641474	-0.0883358	0.86373	2.80867e-16	0.390824	-6.66134e-16	0.436492	-0.323223	0.227585	0.0709563	0.408512	2.80867e-16	0.419685	-3.40015	0.000356529	-3.82557	5.72446e-06	-3.82557	4.1287e-05	-3.11156	0.00131346	-3.43478	0.000652752	-3.43478	0.000365581	-3.48848	8.57449e-06	-3.82557	1.294e-06	-3.82557	2.00272e-06	-3.43478	0.000293285	-3.36382	0.000361523	-3.43478	0.000311702	-0.425424
1-oleoyl-2-linoleoyl-GPE (18:1/18:2)*	-0.0268366	0.99316	0.10587	0.959514	0.666731	0.732273	-0.113926	0.90034	-1.37236	0.205231	-0.728816	0.583055	-0.797188	0.254872	0.61041	0.336357	2.21715	0.00231706	-0.884278	0.343201	-0.867824	0.184157	0.821607	0.371898	-3.38105	0.000222479	-2.38703	0.000279317	-3.73698	4.1287e-05	-2.76823	0.00343584	-1.6415	0.00201193	-2.43059	0.00389134	-4.17824	1.10454e-05	-1.77662	0.00618725	-1.51982	0.00014925	-3.65251	0.000133045	-2.50933	0.00129399	-1.60899	0.0115939	0.994024
1-palmitoyl-2-palmitoleoyl-GPG (16:0/16:1)*	0	NA	0.361147	0.685246	0.473669	0.835223	1.173	0.508179	-0.864095	0.459383	-0.597638	0.680647	0.469226	0.254872	2.49457	6.33317e-05	2.42028	0.0176509	1.64222	0.0527066	1.26933	0.145544	1.34898	0.231509	-2.31037	0.000228404	-2.31037	0.0002559	-1.90128	0.0121865	-2.37356	0.00381387	-2.01241	0.0234077	-1.4908	0.115683	-1.84115	0.00493765	0.184195	0.676876	0.519	0.311047	-0.731335	0.39912	-0.743083	0.388077	-0.14182	0.882649	0
1-palmitoyl-2-oleoyl-GPG (16:0/18:1)	0.995325	0.452702	0.998914	0.550502	0.750408	0.696003	1.33968	0.521406	-0.471945	0.572485	-0.587293	0.462479	-0.21687	0.746294	1.67499	0.0664083	2.1134	0.00278526	0.127482	0.904931	0.204129	0.757911	0.775702	0.163404	-4.47056	5.33877e-05	-3.85034	0.000935229	-3.60417	9.25722e-05	-2.60567	0.00316716	-1.98186	0.00255326	-1.9842	0.00344852	-4.68743	1.25104e-05	-2.17535	0.000425232	-1.49077	0.000387844	-2.47819	0.0233383	-1.77773	0.0181167	-1.2085	0.0223572	0.620222
1-palmitoyl-2-oleoyl-GPI (16:0/18:1)*	-0.674513	0.520805	-0.0961563	0.959514	0.285987	0.772763	-0.178272	0.853448	-0.952614	0.313064	-0.693926	0.159707	-1.78372	0.00152766	-0.601846	0.205843	-0.183704	0.640688	-1.28748	0.151702	-1.4583	0.0476963	-1.16362	0.00197107	-1.14391	0.0011964	-0.766402	0.0665859	-1.20806	0.00756805	-0.802484	0.186034	0.153383	0.697354	0.0938649	0.736756	-2.92763	3.28833e-05	-1.36825	0.00165783	-1.39177	0.000126891	-2.08996	0.00446585	-1.30492	0.0362248	-1.06975	0.00109493	0.37751
1-palmitoyl-2-linoleoyl-GPI (16:0/18:2)	-0.561873	0.606539	0.213603	0.84925	0.402851	0.696003	-0.273812	0.787109	-1.03028	0.320804	-0.818524	0.159707	-3.26767	0.000245509	-1.86545	0.0026996	-1.84076	0.00278526	-2.97961	0.00517723	-3.10933	0.00227427	-3.06214	1.67713e-05	-1.31332	0.000377643	-1.35205	0.00535128	-1.3554	0.00189592	-1.8523	0.0112962	-1.11555	0.00574815	-0.929653	0.00382013	-4.58099	9.3167e-06	-3.21749	2.64142e-06	-3.19616	3.79927e-07	-4.83191	1.3563e-05	-4.22488	0.000102168	-3.99179	3.15567e-07	-0.0387309
1-stearoyl-2-oleoyl-GPI (18:0/18:1)*	-0.580974	0.340618	-0.308326	0.666476	0.167702	0.793437	-0.177027	0.698077	-0.773158	0.172034	-0.202933	0.676459	-0.731586	0.0117847	-0.273385	0.333635	0.176174	0.536194	-0.32764	0.426046	-0.738217	0.0919167	-0.19446	0.484462	-0.188549	0.107975	0.224723	0.343045	-0.0243808	0.905093	-0.330621	0.399287	0.355299	0.279196	0.582223	0.0483621	-0.920135	0.0016686	-0.0486617	0.724888	0.151794	0.207334	-0.658261	0.0713555	-0.382918	0.353097	0.387762	0.264755	0.413272
1-stearoyl-2-linoleoyl-GPI (18:0/18:2)	-0.93083	0.679035	-0.015896	0.990379	0.44484	0.696003	-0.255516	0.85862	-1.21922	0.45527	-0.775043	0.697652	-3.65146	0.00122309	-2.13689	0.00591083	-1.73819	0.0873849	-2.97615	0.0763957	-3.34021	0.00896104	-2.95807	0.0168512	-1.49219	0.000360392	-0.932222	0.0418022	-1.15135	0.0125564	-2.57861	0.0713389	-1.10371	0.0175274	-0.862101	0.0227188	-5.14365	7.89837e-05	-3.06911	0.000133539	-2.88954	0.000590156	-5.55475	3.09361e-05	-4.44391	0.000984542	-3.82017	0.00248879	0.559966
1,2-dioleoyl-GPI (18:1/18:1)	-1.15623	0.563759	-0.309309	0.826976	-0.0360169	0.958315	-0.511796	0.740285	-1.83994	0.165223	-0.81605	0.220024	-2.99274	0.00501612	-0.531826	0.363532	-0.259227	0.571678	-2.3483	0.116675	-2.06246	0.0478923	-1.03926	0.00191959	-1.46348	0.000814618	-0.967153	0.0719517	-1.10152	0.00481975	-1.50081	0.176706	-0.157551	0.727964	-0.0186248	0.955026	-4.45622	0.000252256	-1.49898	0.00109445	-1.36075	0.00151852	-3.84911	0.000914943	-2.22001	0.0203023	-1.05789	0.00149428	0.496331
1-palmitoyl-2-linoleoyl-GPS (16:0/18:2)	-0.0906603	0.927803	0.3811	0.541935	0.467353	0.835223	-0.45246	0.521406	-0.921167	0.377348	-0.312799	0.785028	-1.16465	0.0277628	-0.41823	0.320924	1.62734	0.0873849	-1.52645	0.00307783	-1.7205	0.021898	0.847184	0.312765	-1.72067	0.00105858	-1.27768	0.00392026	-2.66727	0.0043304	-2.13057	3.79933e-05	-1.21582	0.000359643	-2.51916	0.000946956	-2.88532	4.36558e-05	-1.69591	0.000861306	-1.03993	0.00260045	-3.65702	5.52987e-06	-2.93632	0.00079325	-1.67197	0.0100667	0.442987
1-stearoyl-2-oleoyl-GPS (18:0/18:1)	0.585608	0.606539	0.881559	0.383775	0.961965	0.723849	-0.294377	0.781055	-0.912205	0.516599	-0.488234	0.641474	0.598893	0.383678	2.07002	0.0590438	3.83676	7.00754e-05	-0.281093	0.675502	0.276259	0.725889	2.38656	0.0616732	-3.27618	0.00019598	-3.01603	0.000513324	-3.78215	3.88743e-05	-2.36164	0.00302375	-1.80554	0.00329619	-2.49125	0.0258867	-2.67729	0.000785416	-0.946008	0.272129	0.0546113	0.846259	-2.64273	0.00223194	-1.52928	0.0750883	-0.10469	0.881872	0.260151
1-palmitoyl-2-oleoyl-GPS (16:0/18:1)	-0.0112188	0.99316	0.233823	0.704225	0.133594	0.932832	-0.261811	0.727043	-0.791014	0.393087	-0.563062	0.641474	-0.23086	0.559577	0.714901	0.169452	2.06951	0.00200076	-0.481452	0.409494	-0.309936	0.499872	1.37285	0.130737	-2.16202	0.000482979	-1.64983	0.000600247	-2.50371	0.000265088	-1.18654	0.00207902	-0.429321	0.13986	-1.38343	0.0540458	-2.39287	3.45163e-05	-0.934933	0.0628207	-0.434203	0.115442	-1.668	0.00764873	-0.739257	0.106789	-0.0105756	0.983319	0.512181
glycerophosphoserine*	-0.927568	0.597376	1.17766	0.572158	-1.0022	0.863408	-0.940075	0.0989737	-0.232256	0.761975	0.156689	0.697989	-1.63206	0.0114985	1.72003	0.0185073	1.32284	0.616509	-1.64457	0.0727065	0.310111	0.757911	2.48173	0.0915818	1.31847	0.0581439	-3.13174	0.00059514	-2.58957	0.247799	0.403257	0.585453	-1.94172	0.0541749	-3.57942	0.0142179	-0.313591	0.396244	-1.41171	0.0251046	-1.26673	0.0105774	-1.24131	0.00190138	-1.63161	0.00197765	-1.09769	0.00036066	-4.45021
ethanolamine	-2.15132	0.198045	-0.952891	0.685246	-0.662808	0.696003	-0.484915	0.585721	-0.0366081	0.984972	-0.493025	0.822316	-3.07141	0.000192702	-2.76776	0.00931972	0.461267	0.716488	-1.405	0.22592	-1.85148	0.125067	0.63105	0.419685	-1.23407	0.000317829	-1.65221	0.0202236	-5.54522	0.000222104	-1.85732	0.068497	-1.07703	0.269236	-4.67996	2.28317e-07	-4.30548	1.09421e-05	-4.41997	5.56975e-05	-5.08396	5.86872e-05	-3.26232	0.000205672	-2.92851	0.00193981	-4.04891	0.000565205	-0.41814
glycerophosphoethanolamine	-0.238126	0.606539	0.577464	0.572158	-0.0658555	0.970709	-0.446702	0.326337	-0.22639	0.41638	-0.10768	0.877767	-1.27145	0.00011215	0.373939	0.274753	-0.0131707	0.986382	-1.48002	0.00102439	-0.429915	0.30407	-0.054995	0.904552	-1.16727	0.000162988	-2.69824	4.13745e-05	-2.51166	0.0107715	-1.43052	0.000126857	-2.1459	0.000583441	-2.60263	4.92056e-05	-2.43872	8.39161e-08	-2.32431	3.33698e-07	-2.52483	9.11306e-07	-2.91054	9.6536e-07	-2.57581	9.75681e-08	-2.65763	1.11091e-05	-1.53097
glycerophosphoinositol*	-0.773629	0.259745	-0.0907865	0.886256	-0.90523	0.696003	-0.909093	0.0735862	-0.335323	0.393087	-0.365392	0.583055	-2.1782	6.90643e-05	-1.37629	0.000788733	-1.29959	0.250097	-2.31367	0.000315879	-1.62083	0.000182625	-0.759754	0.130737	1.59823	0.000335427	0.124518	0.414737	-0.0527946	0.954806	0.726963	0.0325733	-0.0639088	0.798864	-1.05566	0.0194976	-0.579971	0.00185467	-1.25177	0.000468509	-1.35239	5.12846e-05	-1.5867	3.71264e-05	-1.68474	3.14539e-06	-1.81542	3.39649e-05	-1.47371
glycerophosphorylcholine (GPC)	-0.222974	0.520805	0.102397	0.77033	-0.0230814	0.988363	-0.265392	0.510154	0.0840102	0.707826	-0.147831	0.784606	-1.6402	5.34585e-06	-1.21105	1.23711e-05	-0.397228	0.463935	-1.68262	0.000332317	-1.22944	0.000529494	-0.521977	0.104687	-0.390347	0.00439882	-1.03619	1.2235e-06	-1.67515	0.0049744	-0.272522	0.195313	-0.592995	0.0127922	-1.35744	5.78165e-05	-2.03054	2.04141e-08	-2.24724	4.77848e-08	-2.07238	1.56695e-07	-1.95514	1.39004e-05	-1.82244	5.99167e-06	-1.87941	7.82703e-05	-0.645845
choline	0.0244082	0.978888	-0.218443	0.77033	0.395781	0.696003	0.321207	0.382784	0.559073	0.00786526	0.0904415	0.903086	-0.857341	0.000636292	-0.781964	0.00844878	-0.087752	0.856776	-0.560543	0.0256702	-0.00444795	0.984636	-0.393092	0.23428	-0.714333	0.00131437	-0.659838	0.0140163	-1.32714	0.00247936	-0.677377	0.00270226	-0.865733	0.012544	-0.918809	3.931e-05	-1.57167	1.79502e-06	-1.4418	4.81831e-06	-1.41489	0.0004986	-1.23792	7.12355e-05	-0.870181	9.33294e-06	-1.3119	0.00116868	0.0544952
trimethylamine N-oxide	-0.371609	0.612559	0.28764	0.774533	-0.0877838	0.890957	0.0682811	0.90034	0.0491322	0.925063	-0.840784	0.222184	-0.472301	0.221676	-0.147764	0.762481	-0.166122	0.699547	-0.0324106	0.944219	-0.386272	0.181762	-0.919123	0.00895048	-0.16359	0.700347	-0.644607	0.220685	-0.458765	0.195771	-0.322071	0.392956	-0.143839	0.542308	-0.333421	0.291351	-0.63589	0.0816517	-0.792371	0.0498058	-0.624888	0.136134	-0.354481	0.333676	-0.530111	0.0835855	-1.25254	0.000114133	-0.481018
CDP-choline	0.599	0.734282	1.03688	0.38053	0.380414	0.831764	0.130286	0.80562	1.09643	0.215722	0.928432	0.641474	0.768631	0.349867	-1.35351	0.0634812	-1.187	0.173799	0.299917	0.630352	-1.29396	0.0460751	-0.638986	0.467434	-4.83477	0.000272788	-3.53327	9.90751e-05	-4.45448	0.00018632	-4.38224	6.89762e-05	-2.64286	0.000339178	-4.22054	2.56236e-06	-4.06614	1.18002e-08	-4.88678	4.77591e-06	-5.64148	3.87388e-07	-4.08232	4.72623e-06	-3.93682	6.42254e-06	-4.85952	0.0001779	1.3015
phosphoethanolamine (PE)	0.191258	0.936802	0.213067	0.863716	-0.287157	0.863408	0.236345	0.772193	0.691921	0.253926	0.643771	0.641474	-1.0258	0.192241	-0.830987	0.108422	-1.83321	0.085449	-0.980717	0.166914	-0.352132	0.408512	-0.902281	0.256001	-1.15045	0.0970777	-0.344664	0.324476	-0.306981	0.627887	-1.20377	0.0295339	-0.376172	0.393345	-0.838714	0.0530727	-2.17625	0.000258696	-1.17565	0.0103746	-2.14019	0.000230253	-2.18448	0.0012733	-0.728304	0.0212635	-1.74099	0.0173071	0.805785
phosphocholine	0.511195	0.697942	0.0460851	0.967446	0.414047	0.696003	0.456785	0.521406	0.51652	0.0295578	0.205931	0.776149	0.850225	0.177186	-0.289399	0.238292	-0.590097	0.228009	0.795815	0.268978	0.181036	0.583298	-0.798213	0.0319446	-3.79067	0.000179449	-1.81253	4.52904e-05	-1.25486	0.00453245	-3.53375	0.000250937	-2.02072	0.00146913	-1.09509	0.00348786	-2.94045	1.64568e-07	-2.10193	3.81647e-07	-1.84495	1.06066e-05	-2.73794	0.000532805	-1.83968	0.000154545	-1.8933	0.00102621	1.97814
putrescine	-0.9017	0.448029	-2.24545	0.311375	-1.20759	0.696003	-1.06513	0.0989737	0.0217542	0.977885	0.213516	0.824752	-3.44105	4.74371e-05	-2.58544	0.00180458	-3.04194	0.0784966	-3.60448	0.000561297	-0.318238	0.786375	-1.62083	0.00212505	-1.26036	0.0132407	-2.53736	0.000442552	-3.68078	0.00815378	-1.02427	0.0714642	-3.64502	0.0101687	-3.75058	6.44175e-06	-4.70142	9.79237e-09	-5.1228	1.49115e-06	-6.72272	7.2133e-07	-4.62875	1.54118e-06	-3.96326	2.4485e-07	-5.37141	7.0298e-08	-1.277
N-acetylputrescine	-6.06043	0.00782237	-4.53202	0.127224	-5.14586	0.131716	-2.1744	0.0735862	-1.42259	0.0128797	-0.466686	0.777474	-1.30219	0.0372832	-0.0187622	0.976494	-0.860809	0.536194	2.58384	0.0294031	3.09067	0.0699976	3.81836	0.0103642	-1.0867	0.0502721	-2.86843	0.000548853	-3.4275	0.00335378	-0.883997	0.305895	-1.13731	0.4621	-2.31022	0.0437711	-2.38889	6.45316e-06	-2.88719	8.47623e-06	-4.28831	0.0001672	1.69984	0.00941451	1.95335	1.64211e-05	1.50814	0.00420921	-1.78173
spermidine	-0.205725	0.851448	-1.41704	0.311375	-0.561406	0.863408	-1.07685	0.160129	-0.205826	0.762634	0.150519	0.908423	-2.29862	0.000960661	-2.65835	0.00407395	-2.04815	0.248206	-3.16974	0.00037258	-1.44714	0.0376578	-1.33623	0.0901211	-0.78438	0.0929019	-0.874918	0.143496	-2.59017	0.0717968	-1.10215	0.0581146	-2.404	0.00548972	-3.26362	0.000168734	-3.083	6.13258e-06	-3.53327	3.47021e-05	-4.63832	1.58816e-06	-4.27188	2.0488e-05	-3.85114	2.85457e-05	-4.59984	0.000126386	-0.0905382
5-methylthioadenosine (MTA)	1.41653	0.0228712	0.620006	0.314976	0.924157	0.696003	1.94673	0.0735862	2.88147	2.7592e-05	-0.028918	0.990811	-0.975653	0.00854054	-2.44344	9.67396e-05	1.98541	0.119624	-0.445459	0.387647	-0.181974	0.408512	1.03233	0.0161867	-2.02924	3.32464e-05	-1.27957	0.00214875	-3.30961	0.0023481	-0.960756	0.0048555	-1.00762	0.00175501	-2.7335	1.05937e-05	-3.00489	3.35394e-06	-3.72302	2.5841e-07	-1.3242	0.0256495	-1.40621	0.00512859	-1.18959	2.45003e-06	-1.70117	3.24847e-05	0.749665
spermine	0.0744582	0.989048	-0.965268	0.685246	-0.99107	0.736148	-1.51357	0.44277	-1.11239	0.501799	0.700102	0.82479	3.21162	0.00352932	2.40486	0.0862485	-0.0888706	0.962006	1.6236	0.160163	2.25774	0.0380205	1.6023	0.234465	-1.5677	0.027801	-1.6056	0.123613	-1.88007	0.101999	-0.944158	0.392956	-2.02179	0.0561739	-2.32206	0.0318753	1.64392	0.0241342	0.799265	0.35359	-1.96894	0.087216	0.679437	0.507517	0.235959	0.836512	-0.719763	0.601807	-0.037901
4-acetamidobutanoate	-1.00123	0.404312	-2.49006	0.0690523	-0.771503	0.696003	1.35303	0.482832	1.28489	0.263444	-0.797106	0.641474	-6.45634	1.30453e-06	-6.31644	7.17337e-06	-5.69251	0.0021389	-4.10207	0.00425749	-2.5415	0.0235618	-5.71811	0.000134189	-0.237138	0.415541	-0.466697	0.257717	-0.312709	0.446414	1.4763	0.0320993	-0.242082	0.725789	1.63046	0.00167121	-6.69348	3.99823e-08	-6.78314	1.3375e-07	-6.00522	1.67757e-05	-2.62577	0.00918968	-2.78358	0.00246708	-4.08765	0.000181359	-0.22956
(N(1) + N(8))-acetylspermidine	0.535759	0.606539	-0.559687	0.685246	-0.512881	0.696003	1.12347e-15	0.521406	1.12347e-15	0.501799	1.12347e-15	0.641474	1.12347e-15	0.383678	-0.559687	0.390824	-0.512881	0.436492	-0.535759	0.410238	1.12347e-15	0.408512	1.12347e-15	0.419685	-5.8844	1.50185e-07	-5.32471	8.36682e-05	-5.37152	0.000100289	-5.57349	7.30601e-05	-6.10925	2.41854e-07	-6.10925	2.77713e-08	-5.8844	7.31256e-09	-5.8844	1.03788e-08	-5.8844	2.00617e-08	-6.10925	2.52195e-08	-6.10925	1.20366e-08	-6.10925	3.53724e-08	0.559687
N-acetyl-isoputreanine	3.33443	0.000267302	2.35201	0.0046102	2.21409	0.0378107	0.707606	0.622835	1.53638	0.243211	-0.463605	0.709549	-4.29657	9.86681e-05	-6.23545	1.52846e-05	-2.55219	0.00704054	-6.92339	0.000248444	-7.05109	4.6927e-05	-5.22989	9.0299e-05	-2.05806	0.000439138	-0.156327	0.685779	-0.246033	0.636983	-2.85154	5.27545e-06	-1.93222	3.43553e-06	-2.15985	9.18634e-08	-6.35463	3.60279e-06	-6.39178	2.94678e-06	-2.79823	6.60921e-05	-9.77493	5.59541e-06	-8.98331	1.63599e-06	-7.38974	2.96691e-06	1.90173
pterin	0.0214662	0.99316	-0.0140586	0.990379	-3.33067e-16	0.696003	-0.0709305	0.914728	0.438908	0.501799	0.0952378	0.918557	-0.362207	0.51494	-0.332956	0.297606	0.445783	0.307588	-0.454604	0.410238	0.12001	0.838794	0.541021	0.162283	-1.96784	0.00472396	-2.54895	6.2729e-05	-3.25468	1.50906e-05	-1.47676	0.00545008	-2.09339	0.00132772	-2.78507	1.5907e-06	-2.33005	9.1769e-05	-2.8819	5.00078e-06	-2.8089	3.68663e-05	-1.93136	0.00135528	-1.97338	0.00153143	-2.24405	0.00029424	-0.58111
methylphosphate	-1.07098	0.259745	0.076181	0.963302	-0.248909	0.835223	0.356798	0.677947	-0.0100331	0.996075	-0.480467	0.784606	-1.71927	0.00190081	-0.915894	0.110082	0.078036	0.933754	-0.291492	0.681402	-1.00211	0.26462	-0.153523	0.833126	-1.9505	0.00217108	-2.96232	0.000939037	-3.47407	0.000578021	-3.00833	0.000599049	-2.87299	0.000529525	-3.70983	1.94615e-05	-3.66977	7.62454e-05	-3.87821	5.07404e-05	-3.39603	0.00110263	-3.29982	0.000307429	-3.8751	0.000624549	-3.86335	0.000190071	-1.01182
inosine	-0.128421	0.96204	1.89011	0.208494	0.547884	0.793437	3.00273	0.213561	2.55556	0.0500155	-0.592216	0.841796	-2.96475	0.000739242	-2.12813	0.00390873	2.39112	0.0999694	0.166402	0.905655	-1.46269	0.186447	1.25102	0.388789	-2.72839	0.000903597	-3.46879	9.16413e-05	-5.59076	0.000230738	-1.42477	0.0685872	-0.146641	0.878434	-3.61084	6.88148e-05	-5.69314	1.70983e-06	-5.59692	4.32424e-06	-3.19964	0.00204115	-1.25837	0.310059	-1.60933	0.0461701	-2.35982	0.0686569	-0.740401
hypoxanthine	-0.153541	0.813447	0.10228	0.959514	-0.358251	0.793437	1.5031	0.166318	0.752756	0.141936	0.601932	0.880264	-3.2523	0.000123698	-3.04605	5.36611e-05	-1.47864	0.553334	-1.59565	0.0094798	-2.39558	0.000694872	-0.518452	0.303697	-1.68747	0.000151129	-1.88135	0.00033477	-2.8967	0.000538979	-0.307836	0.328763	-0.245893	0.54154	-1.72178	0.000414585	-4.93976	2.68911e-06	-4.9274	1.43881e-07	-4.37534	0.0270223	-1.90349	0.00142225	-2.64147	1.61355e-05	-2.24023	0.000368369	-0.193879
xanthine	-0.224299	0.633937	-0.625912	0.217703	0.218878	0.824259	-0.220724	0.676959	-0.162651	0.609302	-0.718651	0.267954	-2.97815	9.75795e-06	-2.549	2.88751e-05	-1.89234	0.0144837	-2.97457	0.000240717	-2.08574	0.000104811	-2.82987	6.55956e-07	-2.81725	1.05204e-06	-2.15019	2.24701e-05	-2.67462	0.000216991	-2.03387	0.000292558	-1.76843	0.000263584	-1.44807	0.000107548	-5.7954	2.82598e-08	-4.69918	3.81926e-08	-4.56695	6.3112e-07	-5.00845	8.60286e-07	-3.85416	3.02917e-07	-4.27793	8.23375e-08	0.667061
inosine 5'-monophosphate (IMP)	-0.155884	0.606539	1.12347e-15	0.685246	1.33227e-15	0.696003	0.848169	0.521406	1.12347e-15	0.501799	0.575118	0.641474	-0.155884	0.383678	1.12347e-15	0.390824	1.33227e-15	0.436492	0.848169	0.410238	1.12347e-15	0.408512	0.575118	0.419685	-1.80551	0.0198456	-1.9614	0.0127451	-1.9614	0.0251987	-3.18483	0.00121108	-3.18483	0.00138375	-3.18483	0.00090288	-1.9614	0.00941359	-1.9614	0.00990657	-1.9614	0.0105204	-2.33666	0.0632698	-3.18483	0.000756168	-2.60971	0.0168983	-0.155884
N1-methylinosine	0.20279	0.78689	0.48008	0.765597	0.785354	0.696003	0	NA	0	NA	0	NA	-0.22398	0.271989	-0.767562	0.224127	-0.755478	0.236852	-0.42677	0.225925	-1.24764	0.0151015	-1.54083	0.000800244	-3.93248	3.74249e-06	-3.3889	0.000609403	-3.40098	0.000536778	-3.04704	4.991e-05	-2.22616	0.00103735	-1.93297	0.00020302	-4.15646	2.99392e-08	-4.15646	4.1713e-08	-4.15646	8.46865e-08	-3.47381	5.0285e-08	-3.47381	3.1759e-08	-3.47381	8.23375e-08	0.543582
xanthosine	0.0827447	0.898519	-0.153801	0.794493	1.3223	0.537798	0	NA	0.28908	0.534174	0.592258	0.641474	-0.113862	0.383678	0.151713	0.622535	0.172175	0.844289	-0.196607	0.410238	0.594594	0.10113	-0.557865	0.388133	-4.22845	1.05204e-06	-4.13035	3.85978e-06	-3.45193	0.000955366	-2.97097	1.27142e-05	-3.10942	2.41854e-07	-0.954905	0.00538883	-4.34231	1.53061e-08	-3.97864	3.63662e-07	-3.27976	2.26719e-05	-3.16758	1.02931e-08	-2.51483	4.36241e-05	-1.51277	0.0108341	0.098098
allantoin	0.395504	0.790404	-0.245556	0.863716	0.407136	0.863408	-0.539993	0.521406	-5.61733e-16	0.501799	-0.113713	0.641474	-0.532539	0.50484	-6.71341	3.46445e-06	-4.28792	0.0130131	-1.46804	0.0231245	-6.46785	8.65733e-07	-4.80877	5.27382e-05	-5.0669	0.00012574	0.573974	0.386823	-1.7378	0.142805	-3.66216	0.000198312	1.33766	0.00263311	-0.321428	0.54055	-5.59944	5.20919e-05	-6.13943	9.43951e-07	-6.02572	2.13431e-06	-5.1302	7.28811e-09	-5.1302	2.88162e-09	-5.1302	7.30155e-09	5.64088
2'-AMP	-0.569304	0.461991	-0.635625	0.303304	-0.748741	0.825287	-0.140088	0.758586	-0.447081	0.176189	-0.648638	0.641474	-4.09205	6.89636e-06	-3.34442	1.23711e-05	-1.69276	0.305601	-3.66283	0.000112038	-3.15588	1.31059e-05	-1.59266	0.0394951	-1.68732	0.000524005	-1.89969	0.000295529	-4.53403	0.00564339	-0.227891	0.508687	-0.506579	0.0535541	-3.25404	8.16853e-06	-5.77936	2.14089e-09	-5.24411	5.98702e-10	-6.22679	1.74612e-07	-3.89072	3.24672e-06	-3.66246	1.00259e-06	-4.8467	3.24018e-05	-0.212368
3'-AMP	-0.612642	0.462708	0.0904471	0.915854	-0.504694	0.834533	-0.168649	0.859299	0.296754	0.617757	-0.968618	0.190829	-1.89476	8.4923e-05	-1.35371	0.00314879	0.154353	0.882422	-1.45077	0.105277	-1.1474	0.0279654	-0.309572	0.448172	-2.23456	1.70656e-05	-2.97865	2.01464e-06	-4.99411	0.000578021	-1.17156	0.169103	-1.21256	0.122909	-3.82316	0.000735648	-4.12932	1.03254e-08	-4.33236	2.67164e-07	-4.83976	1.02432e-07	-2.62233	0.0157138	-2.35997	0.0110818	-4.13273	0.000318428	-0.744092
AMP	0.0221755	0.992404	0.431092	0.249088	0.252978	0.890957	-0.31996	0.585721	0.230115	0.608537	0.396597	0.863217	-1.68509	0.000277006	-1.12387	0.0058082	-0.669819	0.675924	-2.02723	0.0037456	-1.32485	0.00113013	-0.526199	0.419685	-2.48011	3.85502e-05	-2.87575	5.80102e-08	-4.19152	0.00110861	-2.28215	3.33197e-05	-2.26888	1.02373e-05	-3.76276	6.67513e-06	-4.1652	7.22539e-10	-3.99962	9.19701e-07	-4.86134	0.000438647	-4.30938	8.39841e-06	-3.59373	6.40446e-08	-4.28896	1.42715e-05	-0.395639
adenosine 3',5'-diphosphate	-0.387418	0.872164	0	NA	-3.33067e-16	0.696003	-0.0148128	0.971269	0.633565	0.529101	0.543475	0.641474	1.06996	0.200595	1.24128	0.0243181	-3.33067e-16	0.436492	1.44256	0.153726	1.87485	0.0207399	0.543475	0.419685	0.342903	0.756283	-1.12024	0.185813	-1.12024	0.248364	0.405358	0.718875	-0.670362	0.419479	-0.670362	0.39237	1.41286	0.103679	0.121045	0.890718	-1.12024	0.173925	1.84792	0.0469642	1.20448	0.23445	-0.126887	0.906784	-1.46314
adenylosuccinate	-0.777052	0.623315	1.35438	0.274761	-6.66134e-16	0.696003	0.353261	0.521406	0.557258	0.501799	0.723359	0.641474	-1.1569	0.203777	-5.61733e-16	0.390824	-6.66134e-16	0.436492	-0.0265905	0.962173	-0.797118	0.408512	0.723359	0.419685	-4.76104	0.000641292	-5.91794	7.29449e-07	-5.91794	6.33348e-06	-6.04158	4.14864e-05	-5.06706	0.000406806	-6.42143	1.53522e-06	-5.91794	8.2063e-08	-5.91794	1.07039e-07	-5.91794	2.05917e-07	-6.06817	9.96399e-06	-5.86417	6.12068e-05	-5.69807	0.000270434	-1.1569
1-methyladenosine	-0.427432	0.520805	-1.1997	0.18845	-0.923309	0.808235	-5.61733e-16	0.521406	0.0890223	0.501799	-0.15656	0.845615	-3.58455	3.48447e-07	-4.106	2.26837e-06	-2.3269	0.138435	-3.15712	7.03801e-05	-2.81728	0.000401963	-1.56015	0.077286	-3.29056	1.05204e-06	-2.76911	1.77469e-05	-4.19237	0.00552136	-2.5351	0.000267073	-2.78592	0.000590229	-3.93279	0.000494958	-6.87511	2.22259e-11	-6.87511	2.96346e-11	-6.51927	8.26429e-08	-5.69222	3.51325e-08	-5.6032	4.02187e-08	-5.49293	5.62541e-07	0.521447
adenosine	-0.207196	0.606539	-1.2333	0.583332	0.155093	0.835223	-0.441982	0.676924	-0.144463	0.830457	-0.839469	0.641474	-1.20045	0.000170876	-0.958098	0.016526	-0.409362	0.561473	-1.43524	0.114793	0.130737	0.912331	-1.40392	0.156453	0.842531	0.00652191	0.676412	0.0553664	0.00609268	0.984452	0.465367	0.392956	-0.726853	0.541538	-0.00878104	0.986257	-0.357924	0.197261	-0.281686	0.379959	-0.403269	0.415534	-0.969873	0.272023	-0.596116	0.344622	-1.4127	0.157855	-0.166119
2'-deoxyadenosine 5'-monophosphate	0.297768	0.755573	-5.61733e-16	0.685246	-0.0518569	0.696003	-5.61733e-16	0.521406	-5.61733e-16	0.501799	-5.61733e-16	0.641474	-0.293344	0.383678	-5.61733e-16	0.390824	-0.0518569	0.436492	-0.591112	0.14018	-5.61733e-16	0.408512	-5.61733e-16	0.419685	-1.31403	0.00630763	-1.60738	2.63227e-05	-1.55552	0.000238278	-1.5804	0.00343854	-2.17151	1.13436e-05	-2.17151	3.66938e-06	-1.60738	7.654e-06	-1.60738	8.4507e-06	-1.60738	1.26058e-05	-2.17151	2.92472e-06	-2.17151	2.54975e-06	-2.17151	3.65592e-06	-0.293344
2'-O-methyladenosine	-0.704812	0.384128	-0.938961	0.127224	0.0683472	0.967331	-0.189979	0.721171	-0.41988	0.308439	-0.600893	0.583055	-3.3839	2.56414e-05	-1.93334	0.000446453	-1.09824	0.309153	-2.86906	0.000442009	-1.41426	0.00105357	-1.76748	0.005874	-1.00436	0.00845671	-0.594819	0.0426245	-1.21792	0.0865088	-0.939643	0.0140908	-0.764253	0.00820328	-0.380046	0.39237	-4.38825	1.97495e-08	-2.52816	1.42148e-06	-2.31616	0.000390994	-3.80871	4.21637e-06	-2.17852	3.83977e-06	-2.14752	1.20226e-06	0.40954
ADP	2.80867e-16	0.606539	2.80867e-16	0.685246	-3.33067e-16	0.696003	2.80867e-16	0.521406	2.80867e-16	0.501799	0.0758215	0.641474	2.80867e-16	0.383678	2.80867e-16	0.390824	-3.33067e-16	0.436492	2.80867e-16	0.410238	2.80867e-16	0.408512	0.0758215	0.419685	-0.526353	0.105592	-0.526353	0.109821	-0.526353	0.160253	-1.04869	0.0712275	-1.04869	0.0779735	-1.04869	0.0654787	-0.526353	0.0964802	-0.526353	0.0992798	-0.526353	0.10169	-1.04869	0.0612472	-1.04869	0.0615361	-0.972869	0.0875357	2.80867e-16
1-methyladenine	-0.0386459	0.980205	-0.046217	0.981268	0.242317	0.882094	0.808286	0.508179	0.523908	0.617757	0.538299	0.777474	-3.94503	1.91372e-06	-3.22213	0.00309228	-2.67321	0.0956923	-3.09809	0.00184414	-2.652	0.00647936	-2.37723	0.00270458	-2.77202	4.33849e-05	-2.01851	0.0107923	-2.45172	0.00971671	-2.59246	0.00019125	-1.84652	0.00113739	-1.9912	0.000264811	-6.71705	2.19063e-09	-5.24064	5.9713e-06	-5.12493	0.000131062	-5.69056	1.40911e-05	-4.49852	0.000117029	-4.36843	2.87861e-05	0.753513
adenine	-0.00597841	0.99316	-0.783848	0.409972	0.355447	0.723849	0.266614	0.521406	-0.166742	0.759061	-0.552819	0.641474	-2.00456	2.242e-05	-2.07486	0.000106256	-1.14296	0.102111	-1.73197	8.85563e-05	-1.45776	0.0323574	-2.05123	0.00598446	0.90922	0.000288144	2.17118	7.44826e-05	2.1429	0.00087206	0.170782	0.335455	0.654874	0.158694	1.76588	1.98223e-05	-1.09534	0.000488881	0.0963201	0.517819	0.999935	0.00990546	-1.56119	2.82092e-05	-0.802881	0.0589113	-0.285344	0.579888	1.26196
2'-deoxyadenosine	0.336032	0.437265	-0.392683	0.699793	0.0150386	0.988363	-0.139246	0.782564	0.0898852	0.614974	-0.561913	0.485764	-1.52465	0.000135644	-1.87014	0.000967847	-1.73389	0.0448377	-1.99993	0.00084253	-1.38758	0.00411816	-2.31084	3.42873e-06	-1.17598	0.000356529	-0.81579	0.0595083	-0.636116	0.175991	-2.41712	4.14864e-05	-2.78565	0.000122067	-2.19825	3.53684e-06	-2.70063	3.40764e-06	-2.68593	5.43451e-07	-2.37001	0.000120195	-4.41705	1.54662e-06	-4.17322	5.65378e-08	-4.50909	8.23375e-08	0.36019
N6-succinyladenosine	-0.552377	0.414554	-0.778506	0.352337	-0.335216	0.890957	0	NA	-2.11796	0.00474482	-1.3578	0.348972	-0.833618	0.0301143	0.589271	0.154045	2.47981	0.0873849	-0.281241	0.0845318	-0.750186	0.125067	1.45722	0.107317	-2.87303	0.000209662	-1.86939	0.000836478	-2.25732	0.0361359	-3.40809	6.07958e-05	-2.63058	0.00129917	-2.57521	0.00491555	-3.70665	9.61251e-07	-1.28012	0.0109048	0.222487	0.646424	-3.68933	8.25129e-06	-3.38076	3.73315e-05	-1.11799	0.0727063	1.00364
N6-carbamoylthreonyladenosine	0.102662	0.606539	-0.580871	0.544685	0.19247	0.863408	2.80867e-16	0.521406	2.80867e-16	0.501799	2.80867e-16	0.641474	2.80867e-16	0.383678	-1.7791	5.6844e-05	-1.68909	0.0198425	-0.102662	0.410238	-1.19823	0.0177004	-1.88156	2.83196e-05	-2.67202	1.2906e-06	-0.892916	0.00723729	-0.98293	0.0603737	-1.79366	2.09043e-05	-0.698094	0.123285	-0.014768	0.950662	-2.67202	1.17824e-07	-2.67202	1.52151e-07	-2.67202	2.77068e-07	-1.89632	3.57476e-07	-1.89632	2.46416e-07	-1.89632	5.91341e-07	1.7791
guanosine 3'-monophosphate (3'-GMP)	-0.390888	0.606539	-0.190461	0.900306	-0.457405	0.863408	-0.258595	0.764387	-0.099411	0.929498	-1.08503	0.296668	-1.3907	0.000148634	-1.43224	0.0750299	0.193613	0.889617	-1.2584	0.135396	-1.34119	0.0420641	-0.434011	0.345025	-1.01002	0.00562109	-1.58287	0.00120132	-4.28503	0.00385023	-0.364835	0.470894	-0.73726	0.208536	-3.70637	5.56246e-05	-2.40071	6.42746e-06	-3.0151	0.00167724	-4.09142	3.21504e-05	-1.62324	0.0272872	-2.07845	0.000707307	-4.14038	1.66818e-06	-0.572851
guanosine 2'-monophosphate (2'-GMP)*	-0.535141	0.437265	-0.861843	0.153269	-0.640204	0.841296	-0.32337	0.590453	-0.621041	0.0350097	-0.66066	0.641474	-4.25427	3.46726e-06	-3.33521	1.41331e-05	-1.64571	0.339153	-4.0425	0.0001723	-3.0944	4.22137e-06	-1.66617	0.015977	-1.44059	0.000963562	-1.49768	0.00137037	-4.26927	0.00905304	0.366878	0.297124	-0.0169127	0.951062	-2.56686	5.71587e-05	-5.69487	3.45896e-09	-4.83289	7.68749e-09	-5.91498	4.85318e-07	-3.67562	5.0374e-05	-3.11132	2.95315e-06	-4.23303	3.1657e-05	-0.0570893
guanosine	-0.906948	0.457994	0.689053	0.572158	-0.405766	0.825287	0.413259	0.521406	-0.0771092	0.949194	-0.655929	0.646752	-0.639771	0.157858	-0.58607	0.289851	0.632643	0.466638	0.680435	0.386131	-1.35223	0.112708	0.38248	0.63704	-1.82576	0.000719041	-2.42154	1.74774e-05	-3.80709	0.000230738	-1.95738	0.00906918	-0.95716	0.114909	-3.43753	3.8971e-05	-2.46553	3.3818e-05	-3.00761	0.000234141	-3.17444	0.000145183	-1.27694	0.00757711	-2.30939	0.00175312	-3.05505	0.000897502	-0.595782
5'- GMP	-0.0495877	0.93937	-0.209842	0.754012	0.329886	0.863408	-0.661692	0.0989737	-0.163828	0.724718	-0.248884	0.82479	-1.60247	6.19793e-05	-1.04351	0.0049223	-0.546809	0.634826	-2.21457	6.84563e-05	-0.997493	0.0261278	-1.12558	0.0359515	-0.957773	0.000736214	-1.56954	8.07636e-05	-2.84684	0.00596046	-1.12801	0.000393441	-1.90004	0.000229953	-2.6376	0.000144902	-2.56024	5.84315e-08	-2.61305	1.7146e-06	-3.39364	9.65109e-05	-3.34259	6.82599e-07	-2.89753	9.77841e-06	-3.76318	9.44055e-07	-0.611769
guanine	-0.821337	0.0481279	0.593333	0.544685	-0.370665	0.835223	-0.474082	0.521406	-0.270847	0.491281	-0.96467	0.249465	-1.01295	0.00236066	-1.18257	0.0140918	-1.05009	0.18768	-0.665696	0.18078	-2.04675	0.000668879	-1.64409	0.00837379	-1.17186	0.000368905	-1.5791	0.00140604	-2.55076	0.00175832	-1.28927	0.000974651	-0.281843	0.497553	-2.2175	0.000643486	-2.18481	2.27857e-06	-2.76167	2.11233e-06	-3.60085	1.29696e-06	-1.95497	0.00210486	-2.32859	1.26733e-05	-3.8616	4.74385e-06	-0.40724
2'-O-methylguanosine	0.182836	0.947445	-0.366941	0.685246	0.31401	0.863408	-2.80867e-16	0.521406	0.249435	0.341879	-0.563444	0.488216	-1.77068	0.0174382	-1.52797	9.06789e-05	-0.555564	0.551827	-1.95351	0.0150756	-0.91159	0.0592082	-1.43302	0.000924704	-3.83148	0.000288144	-2.96516	1.23695e-06	-3.10524	0.00292549	-2.40401	0.00487598	-2.08746	0.00142411	-1.5466	0.000180933	-5.60216	1.01777e-10	-4.49313	8.36141e-09	-3.66081	2.67358e-06	-4.35752	2.80353e-08	-2.99905	4.70367e-07	-2.97961	3.18305e-06	0.866319
7-methylguanine	-0.771363	0.269005	-0.564522	0.426002	-0.181387	0.863408	-0.440272	0.380203	-0.0505323	0.851384	-0.0682613	0.953547	-0.828694	0.00679416	-0.536931	0.0811484	-0.412168	0.597802	-0.497604	0.255215	-0.0229415	0.946557	-0.299042	0.0596782	-2.1253	3.83791e-05	-1.53425	0.000190582	-1.17728	0.017057	-2.30628	0.000174595	-1.5084	0.00109656	-0.768289	0.00034306	-2.95399	8.06158e-09	-2.07118	2.57591e-06	-1.58945	0.00436105	-2.80388	2.79123e-06	-1.53134	4.01968e-07	-1.06733	3.84189e-06	0.591043
N2,N2-dimethylguanosine	0.287057	0.797901	-0.132079	0.938533	0.367656	0.779318	0.208223	0.521406	1.10509	0.0259749	-0.0619551	0.983163	-2.51271	6.77726e-05	-4.15023	7.8551e-06	-2.57565	0.00866823	-2.59154	0.00134912	-2.91306	0.000272399	-3.00526	0.000786333	-4.26555	9.42291e-06	-1.96515	0.000430929	-2.06631	0.00250782	-3.20457	0.000179718	-1.3233	0.00472061	-0.924734	0.000994436	-6.77826	3.12382e-10	-6.11538	5.79699e-09	-4.64196	1.08559e-06	-5.79611	6.48024e-08	-4.23636	3.51601e-07	-3.92999	4.40272e-05	2.3004
cytidine 2' or 3'-monophosphate (2' or 3'-CMP)	-0.720784	0.269005	-0.741734	0.352337	-0.982954	0.696003	-0.039315	0.942447	-0.412937	0.217242	-0.308444	0.817014	-3.20421	9.75795e-06	-1.90076	0.000380335	-1.06317	0.436492	-2.52274	0.00116503	-1.57196	0.00287575	-0.388662	0.419685	-1.87403	5.75502e-05	-2.77339	2.73629e-05	-4.88785	0.0010213	-1.09823	0.00811059	-2.01854	0.000474574	-4.37421	1.57441e-06	-5.07824	1.0205e-08	-4.67415	4.06585e-09	-5.95102	3.31656e-06	-3.62097	1.78068e-05	-3.5905	4.24365e-07	-4.76288	1.68381e-06	-0.899357
CMP	-0.162539	0.847473	-0.203666	0.752447	0.428342	0.835223	-0.458211	0.380203	-0.25301	0.560116	-0.415596	0.641474	-2.04947	0.000123698	-1.12716	0.00795813	-0.673627	0.512244	-2.34514	0.00042026	-1.1765	0.00578177	-1.51756	0.00843401	-0.667252	0.0276966	-0.899074	0.00217725	-2.06429	0.0134612	-0.870102	0.0160143	-1.14305	0.00120735	-1.67626	0.00142487	-2.71672	9.96095e-08	-2.02623	3.87793e-05	-2.73791	0.000137688	-3.21524	8.46332e-07	-2.31955	7.58154e-06	-3.19382	1.09429e-06	-0.231822
cytidine	-0.408416	0.612559	-0.300291	0.774533	-0.26403	0.863408	1.84874	0.165601	-0.494175	0.600658	-0.0463346	0.986174	-2.3377	0.0079489	-0.584502	0.340829	-2.17436	0.0832581	-0.0805435	0.870324	-0.778386	0.253312	-1.95666	0.00320524	-1.37685	0.0144177	-2.05944	0.00109129	-2.22785	0.0112379	-1.04726	0.00894332	-1.62173	0.00211251	-1.75388	0.000226981	-3.71455	0.000125028	-2.64395	0.000455046	-4.40221	2.6155e-05	-1.1278	0.0303949	-2.40011	0.0022678	-3.71054	3.13201e-05	-0.682598
2'-deoxycytidine 3'-monophosphate	-0.183503	0.851815	5.61733e-16	0.685246	-0.0120099	0.696003	5.61733e-16	0.521406	5.61733e-16	0.501799	5.61733e-16	0.641474	-0.528915	0.212226	5.61733e-16	0.390824	-0.0120099	0.436492	-0.345412	0.233672	5.61733e-16	0.408512	5.61733e-16	0.419685	-1.65009	0.00351429	-2.17901	3.57052e-06	-2.167	3.02146e-05	-2.16837	0.000208463	-2.51378	7.02597e-06	-2.51378	1.91263e-06	-2.17901	5.87912e-07	-2.17901	6.74182e-07	-2.17901	1.09218e-06	-2.51378	1.53577e-06	-2.51378	1.20668e-06	-2.51378	2.06398e-06	-0.528915
cytidine diphosphate	2.80867e-16	0.606539	2.80867e-16	0.685246	-4.996e-16	0.696003	0.341263	0.521406	2.80867e-16	0.501799	2.80867e-16	0.641474	2.80867e-16	0.383678	2.80867e-16	0.390824	-4.996e-16	0.436492	0.341263	0.268978	2.80867e-16	0.408512	2.80867e-16	0.419685	-0.705807	0.119532	-0.705807	0.123613	-0.705807	0.177352	-2.80867e-16	0.392956	-2.80867e-16	0.419479	-2.80867e-16	0.39237	-0.705807	0.109683	-0.705807	0.112697	-0.705807	0.115157	0.341263	0.211395	-2.80867e-16	0.375707	-2.80867e-16	0.387243	2.80867e-16
3-methylcytidine	0.222965	0.755573	-0.820145	0.544685	-0.129159	0.909695	-2.80867e-16	0.521406	-2.80867e-16	0.501799	0.16016	0.641474	-0.326122	0.219933	-1.32316	0.0317494	-0.414957	0.436492	-0.549088	0.0774812	-0.503017	0.205481	-0.125639	0.722572	-3.55068	1.59153e-05	-2.55364	0.00164015	-3.46184	0.000347607	-2.3644	0.000376326	-2.41047	0.00103735	-2.62769	0.000127405	-3.8768	7.64825e-08	-3.8768	9.9293e-08	-3.8768	1.92565e-07	-2.91349	7.10511e-06	-2.91349	6.40241e-06	-2.75333	3.79479e-05	0.99704
cytosine	0.40288	0.476973	-0.644069	0.44421	0.315904	0.696003	0.304694	0.788606	-0.176428	0.806574	-0.113246	0.903086	-0.78489	0.166581	-1.5147	0.0183384	-1.40825	0.0784966	-0.883075	0.240668	-1.04706	0.0346127	-1.8374	0.000205181	-2.2792	2.09511e-05	-1.28003	0.0108132	-1.68567	0.000946302	-0.545796	0.0999181	-0.593575	0.0370394	-0.0392456	0.872665	-3.06409	0.00019041	-2.79473	6.06256e-05	-3.09392	7.4357e-05	-1.42887	0.0381471	-1.64063	0.00199827	-1.87664	5.43391e-05	0.99917
2'-O-methylcytidine	0.51087	0.619105	-0.468648	0.740822	0.243399	0.92063	1.40433e-16	0.521406	1.40433e-16	0.501799	1.40433e-16	0.641474	-0.747664	0.0823426	-1.80025	0.00124381	-1.69116	0.103785	-1.25853	0.034711	-1.3316	0.0352914	-1.93456	0.056075	0.154473	0.752953	1.20706	0.0274957	1.09797	0.191983	1.25853	0.026829	1.3316	0.0302665	1.93456	0.036085	-0.593191	0.0544435	-0.593191	0.0558498	-0.593191	0.0581249	-1.40433e-16	0.361953	-1.40433e-16	0.375707	-1.40433e-16	0.387243	1.05259
orotidine	0.0252584	0.992404	-0.00242463	0.996242	-0.0183042	0.988363	0.434977	0.521406	-0.0120119	0.965234	0.237846	0.706597	-2.77464	5.49047e-05	-2.32525	2.16475e-05	-1.04528	0.0882143	-2.36492	0.000846589	-2.33484	0.000221269	-0.78913	0.0750002	-2.96731	7.68253e-05	-3.29869	6.07016e-06	-4.6523	6.24115e-05	-2.76437	2.8269e-05	-3.12344	2.98704e-05	-4.49293	3.73936e-08	-5.74195	2.32823e-09	-5.62394	1.02918e-08	-5.69758	8.38946e-09	-5.1293	7.31174e-07	-5.45828	3.40024e-09	-5.28206	9.44055e-07	-0.331382
orotate	-0.970177	0.520805	-0.807946	0.44421	-0.115305	0.890957	-0.54205	0.584972	-0.923147	0.125803	-0.28574	0.776149	-1.25858	0.045768	-1.6307	0.013689	-2.24904	0.0290892	-0.830455	0.410238	-1.7459	0.0025608	-2.41947	1.86699e-05	3.89958	0.000494079	4.53325	0.000235139	4.95144	0.000343726	2.71698	0.00647622	3.51288	0.000115712	4.62371	4.18428e-06	2.641	0.000779612	2.90255	0.000404695	2.7024	0.00222624	1.88652	0.0321788	1.76698	0.00568558	2.20424	0.000710361	0.633671
TMP	0.162303	0.843816	-2.80867e-16	0.685246	-3.33067e-16	0.696003	-2.80867e-16	0.521406	-2.80867e-16	0.501799	-2.80867e-16	0.641474	-0.141582	0.383678	-2.80867e-16	0.390824	-3.33067e-16	0.436492	-0.303884	0.410238	-2.80867e-16	0.408512	-2.80867e-16	0.419685	-1.45609	0.000360816	-1.59767	4.94727e-05	-1.59767	0.00029132	-1.75367	0.00148767	-2.05756	7.31687e-06	-2.05756	2.07993e-06	-1.59767	1.59064e-05	-1.59767	1.75633e-05	-1.59767	2.39479e-05	-2.05756	1.62485e-06	-2.05756	1.32734e-06	-2.05756	2.1458e-06	-0.141582
thymidine	-0.0682504	0.96204	-0.511916	0.449426	0.150343	0.894704	-0.0828824	0.789885	-0.0513581	0.885182	-0.42296	0.641474	-2.41037	3.56401e-05	-2.1143	9.31906e-05	-1.6766	0.0796079	-2.425	0.000405161	-1.65375	0.00121781	-2.2499	0.0001148	-1.5008	0.000416212	-1.33239	0.000268127	-1.50078	0.0198428	-1.81555	0.000648934	-2.09079	0.000229079	-1.59693	2.93681e-05	-3.91117	5.95924e-09	-3.44669	2.36003e-07	-3.17737	1.06066e-05	-4.24054	1.67842e-07	-3.74454	5.65378e-08	-3.84683	9.92602e-07	0.168418
thymine	-0.0383291	0.990118	-0.424937	0.664546	0.0862595	0.942916	-8.426e-16	0.521406	-0.161136	0.386109	-0.335524	0.583055	-1.97517	0.000596887	-2.33352	4.74024e-05	-1.97453	0.0323622	-1.93684	0.00106397	-2.06972	0.000414197	-2.39632	4.36929e-05	-3.07965	5.75502e-05	-2.56016	1.74774e-05	-2.74477	0.00113892	-1.99246	0.000807522	-1.85958	0.000764472	-1.53298	0.000310521	-5.05482	2.00793e-11	-4.89369	1.72502e-09	-4.7193	1.75785e-07	-3.9293	4.55948e-09	-3.9293	2.08083e-09	-3.9293	4.4939e-09	0.519488
uridine 3'-monophosphate (3'-UMP)	-0.138031	0.927803	0.145318	0.685246	-0.0411546	0.964238	0.522326	0.542505	0.693823	0.491281	-0.466151	0.583055	-3.336	0.000105843	-2.75708	0.000103944	0.153816	0.802709	-2.67564	0.00527778	-2.20858	0.00411816	-0.271181	0.312765	-1.55257	0.00151754	-2.18739	8.51457e-05	-5.09323	3.02146e-05	-0.729059	0.214167	-1.08053	0.0113714	-4.17284	7.16493e-06	-4.88857	3.60279e-06	-4.94448	1.74377e-06	-4.93941	2.87905e-06	-3.4047	0.00030253	-3.28911	0.000450734	-4.44402	1.66818e-06	-0.634822
uridine 2'-monophosphate (2'-UMP)*	-0.54472	0.414554	-0.823445	0.416365	-0.557195	0.861536	-0.26738	0.590453	-0.274439	0.494911	-0.619288	0.583055	-2.39678	1.99088e-05	-2.08772	0.000416845	-0.078962	0.952657	-2.11944	0.00205837	-1.53872	0.0102376	-0.141056	0.848013	-1.86265	0.000104964	-2.1137	0.00038407	-5.04039	0.00179375	-0.703634	0.0598247	-1.2334	0.0192371	-3.89385	0.000192029	-4.25944	6.63928e-09	-4.20142	1.10262e-08	-5.11936	3.79927e-07	-2.82308	8.61311e-05	-2.77212	1.13968e-05	-4.0349	5.19642e-06	-0.251042
UMP	-0.196249	0.872164	0.0926733	0.953251	0.367142	0.863408	-0.401816	0.521406	0.00336949	0.996342	-0.146443	0.903086	-2.7634	0.000300958	-2.18369	4.10994e-05	-0.639016	0.556461	-2.96897	0.0011592	-2.273	0.00241853	-1.1526	0.0993672	-1.25087	0.0156736	-1.87825	1.34367e-05	-4.20412	0.00176909	-0.960472	0.038664	-1.29893	0.00869746	-3.35034	3.71335e-06	-4.01427	3.87023e-07	-4.06194	6.21192e-07	-4.84314	8.0891e-07	-3.92944	1.53087e-05	-3.57193	7.72129e-06	-4.50294	3.31081e-05	-0.627381
uridine	-0.12997	0.927803	-0.3682	0.757466	0.586743	0.793437	0.244256	0.66038	0.137786	0.73394	0.114095	0.900009	-2.24138	0.000233445	-0.248415	0.542975	0.628481	0.527098	-1.86716	0.00796991	0.257572	0.585973	0.155832	0.760531	-1.28597	0.00943919	-1.82267	0.0028702	-2.8359	0.00653012	-1.00503	0.0906391	-1.77996	0.0127922	-1.83825	0.0060713	-3.52735	3.57077e-06	-2.07109	0.00019367	-2.20742	0.000581911	-2.87218	0.000411791	-1.52239	0.00603026	-1.68241	0.00569838	-0.536706
2'-deoxyuridine	-0.0743385	0.980205	-0.566741	0.685246	0.0590679	0.964238	-0.119332	0.791092	0.277821	0.43937	-0.35917	0.641474	-2.64524	0.000537284	-2.27629	2.01428e-05	-1.71166	0.0870559	-2.69023	0.00106272	-1.43173	0.0454038	-2.1299	0.000295131	-2.52719	0.000498061	-2.62283	2.03283e-07	-3.07812	0.00166443	-2.27879	0.00104851	-2.86683	0.00175501	-2.69631	9.04365e-07	-5.17243	6.20541e-09	-4.89912	3.74047e-08	-4.78978	2.56532e-07	-4.96902	4.71378e-07	-4.29856	2.26309e-08	-4.82621	1.17894e-06	-0.0956381
uracil	-0.816747	0.448029	-0.613777	0.488438	0.221744	0.835223	-0.116916	0.868052	-0.803334	0.08686	-1.05162	0.16229	-5.48552	5.34585e-06	-2.92877	7.52398e-05	-1.99719	0.0169725	-4.78569	0.000234302	-3.11832	0.000117949	-3.27055	7.8349e-06	-3.35939	5.10104e-06	-3.58649	2.17234e-05	-3.63264	9.28282e-05	-2.03129	0.00906918	-2.05543	0.00113739	-1.26606	0.00434272	-8.84491	9.66312e-09	-6.51525	1.03849e-10	-5.62983	1.48263e-07	-6.81699	9.08567e-07	-5.17375	2.22514e-06	-4.5366	2.94155e-06	-0.227102
pseudouridine	0.212582	0.790404	-0.21439	0.787124	0.321611	0.783218	0.347462	0.521406	0.606913	0.0263252	-0.213039	0.645951	-3.66141	6.92716e-06	-4.06522	1.04556e-07	-2.5639	0.00278526	-3.52653	0.000150711	-3.24392	6.88944e-05	-3.09855	1.55616e-05	-3.19056	1.28713e-05	-2.31445	7.29449e-07	-3.16271	0.000216991	-2.18073	0.000174595	-1.7316	0.00133825	-2.04386	1.65303e-06	-6.85197	3.15907e-10	-6.37967	5.14414e-10	-5.72662	4.77719e-09	-5.70726	2.97998e-07	-4.97551	3.85474e-09	-5.14241	1.0035e-07	0.876107
beta-alanine	-0.0867376	0.851448	0.19719	0.794493	0.0225988	0.988363	-0.827778	0.115201	-0.214539	0.494154	-0.312254	0.641474	-1.78129	0.00010824	-1.55495	0.00186771	-1.14998	0.114827	-2.52233	6.22008e-05	-1.96668	1.64474e-05	-1.48483	0.00270458	-1.8408	4.55309e-05	-1.5167	0.00137037	-1.68785	0.00472185	-1.73058	8.48575e-06	-1.12255	6.27649e-05	-1.4683	0.000256591	-3.62209	1.3043e-07	-3.07164	3.55102e-07	-2.83783	1.22379e-05	-4.25291	1.07769e-07	-3.08923	6.98756e-09	-2.95313	1.78272e-06	0.324101
5-methyluridine (ribothymidine)	0	NA	0	NA	0.0589641	0.945673	0	NA	0.0377011	0.501799	0.461881	0.583055	0	NA	0	NA	-0.281113	0.436492	0	NA	0.0377011	0.408512	0.121804	0.798063	-1.06766	0.0582403	-1.06766	0.059777	-0.786542	0.248741	-1.77593	0.0137787	-1.77593	0.0156227	-1.43585	0.0437711	-1.06766	0.0513549	-1.06766	0.0525327	-1.06766	0.0546059	-1.77593	0.0108792	-1.73823	0.0126761	-1.31405	0.0719546	0
2'-O-methyluridine	-0.286627	0.78689	-0.548839	0.573923	0.168173	0.906028	-2.80867e-16	0.521406	-0.626465	0.295734	-0.423413	0.613383	-1.76876	0.00037917	-1.10987	0.00514146	-1.00489	0.267183	-1.48213	0.00864287	-1.1875	0.0518543	-1.59647	0.000880214	-2.65601	5.83071e-05	-1.992	9.16413e-05	-1.88602	0.0160335	-2.1224	0.00121974	-1.7206	0.00285899	-0.897616	0.00257204	-4.42477	6.63344e-10	-3.10187	3.56706e-07	-2.89091	4.93323e-06	-3.60454	1.16851e-08	-2.9081	3.20488e-05	-2.49409	8.72468e-06	0.664012
5,6-dihydrouridine	0.193792	0.843816	-0.0116087	0.990379	0.262263	0.835223	0.582376	0.521406	0.322481	0.341879	-0.12408	0.903086	-3.36842	2.47871e-05	-3.03028	1.33702e-06	-1.43612	0.078421	-2.97984	0.00372836	-2.69619	0.000317383	-1.82247	0.00708365	-3.51842	2.61969e-05	-1.81817	9.61085e-06	-2.25833	0.00253456	-2.88801	4.67161e-05	-1.39316	0.00542385	-1.55945	3.8824e-06	-6.88684	7.03494e-10	-4.84845	1.03788e-08	-3.69445	6.19717e-07	-5.86785	1.4547e-05	-4.08935	4.95315e-08	-3.38192	7.69972e-05	1.70025
FMN	-0.864549	0.164851	-0.324547	0.685246	0.582256	0.772302	-0.639729	0.521406	-0.191343	0.801203	-0.349128	0.706597	-2.74022	0.000823243	-1.95147	0.000620529	-0.730593	0.436492	-2.5154	0.000292813	-1.81826	0.0111032	-1.66198	0.010464	-1.16522	0.00171668	-1.65982	0.00102698	-3.24778	0.00167219	-1.12085	0.00274066	-1.07544	0.00133825	-1.7566	0.000432827	-3.90545	2.78477e-05	-3.61128	1.35398e-07	-3.97837	3.12845e-06	-3.63625	1.96245e-06	-2.8937	0.00038585	-3.41858	2.40692e-05	-0.494592
FAD	-0.0382193	0.980205	0.130988	0.945791	-0.784962	0.696003	-0.256539	0.659618	-0.561033	0.240586	-0.761404	0.511093	-2.20131	0.000439959	-1.34742	0.00471245	0.19243	0.757239	-2.41963	0.000450041	-2.03944	0.00296867	0.215987	0.659443	-1.79218	5.32562e-05	-1.85162	0.000843808	-3.31688	8.92564e-05	-1.4082	0.00199839	-1.29844	0.00734183	-3.67965	4.24644e-06	-3.99349	3.26914e-06	-3.19905	7.66265e-08	-3.12445	2.23768e-05	-3.82783	7.81407e-07	-3.33788	5.72412e-06	-3.46366	1.26195e-05	-0.0594449
riboflavin (Vitamin B2)	-1.28454	0.269005	-1.20251	0.0921598	-0.147374	0.893842	-0.144589	0.521406	-0.108961	0.640608	-0.0954167	0.823517	-4.30765	1.97016e-06	-3.92782	1.33702e-06	-2.82005	0.00547129	-3.1677	0.00119548	-2.83427	0.00011594	-2.76809	3.42873e-06	-1.44067	0.000242976	-1.81842	1.24554e-05	-2.88736	0.00101939	-1.17953	0.0824572	-1.47525	0.00358674	-1.48905	1.98223e-05	-5.74832	3.96765e-09	-5.74624	6.2805e-09	-5.70741	1.10278e-08	-4.34722	7.77276e-09	-4.30952	4.47798e-09	-4.25714	4.09444e-08	-0.377751
butyrate/isobutyrate (4:0)	0.152757	0.978481	-0.358131	0.963302	2.04059	0.696003	-1.07995	0.508179	-0.194641	0.867924	0.274955	0.918557	-0.353	0.573079	-0.68181	0.707156	-2.62368	0.300801	-1.58571	0.237814	-0.51832	0.762224	-4.38931	0.00471735	1.82995	0.00217108	3.22329	0.0986819	5.48414	0.0119478	1.83693	0.132315	2.71938	0.102557	7.37895	9.04365e-07	1.47695	0.0208246	2.54148	0.000125642	2.86046	0.0042474	0.251226	0.672274	2.20106	0.0203215	2.98964	0.0182964	1.39334
3-ketosphinganine	-0.760623	0.78324	1.08825	0.735367	-0.0499994	0.988363	-5.61733e-16	0.521406	-1.41549	0.210442	-0.833797	0.585781	-2.73908	0.0239013	0.604495	0.51732	-0.237921	0.883427	-1.97846	0.0495322	-1.89924	0.198149	-1.02172	0.258283	-1.21385	0.326275	-2.64484	0.0278402	-2.88121	0.0554078	-1.64677	0.154723	-1.22889	0.414339	-2.60351	0.0277436	-3.95293	0.000155559	-2.04034	0.0233789	-3.11913	0.00547175	-3.62523	0.000498068	-3.12813	0.00565284	-3.62523	0.000534629	-1.43099
phytosphingosine	-0.363163	0.792447	-0.732051	0.685246	0.134306	0.91209	1.06374	0.508179	-0.097272	0.938628	-0.269134	0.817014	-2.68405	0.00280376	-1.07567	0.135858	-0.0148093	0.982238	-1.25716	0.172598	-0.440896	0.627493	-0.41825	0.419685	-1.10665	0.0593031	-1.64967	0.0183253	-2.16521	0.00161932	-1.34982	0.0451153	-2.26173	0.00632396	-1.91092	0.00491555	-3.7907	6.32062e-05	-2.72535	0.000330575	-2.18002	0.00298908	-2.60697	0.00326089	-2.70263	0.00462411	-2.32917	0.000158876	-0.543024
sphinganine	-0.671411	0.606539	0.418473	0.884324	0.0659664	0.956377	-0.147418	0.869032	-1.65184	0.172711	-0.739234	0.641474	-1.48381	0.0364366	1.28623	0.0882563	2.94706	0.00537779	-0.959816	0.271365	-0.784085	0.486675	2.14186	0.0124105	0.0772924	0.878822	-0.347229	0.291051	-0.621624	0.0692858	0.483998	0.453268	1.14936	0.281256	0.522459	0.263635	-1.40652	0.00402565	0.939002	0.130578	2.32543	0.000366809	-0.475818	0.361953	0.365275	0.481838	2.66432	0.000754384	-0.424521
eicosanoylsphingosine (d20:1)*	-0.468655	0.712243	0.0745431	0.959514	0.0751999	0.942916	-1.12347e-15	0.521406	-1.12347e-15	0.501799	-0.606509	0.583055	-0.79502	0.19733	-0.196419	0.390824	0.364248	0.60282	-0.326365	0.410238	-0.270962	0.408512	-0.317461	0.419685	-0.00482097	0.994785	-0.603422	0.355596	-0.55758	0.452599	-0.818793	0.348518	-0.874197	0.318965	-0.827698	0.333138	-0.799841	0.178424	-0.799841	0.184864	-0.193332	0.791483	-1.14516	0.136065	-1.14516	0.138215	-1.14516	0.145705	-0.598601
sphingosine	-0.0697502	0.96204	-0.259372	0.821624	0.671506	0.250633	0.427027	0.521406	-1.69267	0.0665295	-1.15868	0.16229	-0.41888	0.217561	1.01139	0.0718223	2.57521	1.02049e-05	0.0778964	0.864054	-0.421904	0.46096	0.745019	0.125907	-1.06223	0.0815952	-0.581246	0.264162	-1.54528	0.0206704	-0.887454	0.123983	-0.596089	0.393709	-0.629246	0.22963	-1.48111	0.00956854	0.430147	0.500007	1.02992	0.0523711	-0.809558	0.172041	-1.01799	0.0898084	0.115773	0.854279	0.480987
ergosterol	-0.674398	0.391859	0.150291	0.917294	0.445631	0.696003	-0.356278	0.521406	-0.942085	0.309902	-0.611003	0.409259	-2.76639	2.59194e-05	-1.38905	0.0149252	-0.581638	0.268673	-2.44827	0.00149522	-2.48143	0.00411816	-1.63827	0.000474147	-0.960644	0.00372767	-0.932312	0.0309317	-1.10955	0.0128146	-0.879728	0.134926	-0.0267069	0.958915	0.0913975	0.849461	-3.72703	1.36834e-06	-2.32137	0.00015154	-1.69118	0.000377743	-3.328	0.000132561	-2.50814	0.00278468	-1.54687	0.00613808	0.0283324
aconitate [cis or trans]	-0.296437	0.606539	-0.386697	0.397669	-0.090459	0.964238	0.726628	0.50802	0.134941	0.767185	-0.396185	0.773537	-2.56861	2.57648e-05	-1.77725	0.000193179	0.100518	0.931846	-1.54554	0.0180226	-1.25561	0.00437608	-0.205209	0.759248	-0.539349	0.124577	-0.466482	0.151175	-2.33782	0.0189334	-0.752728	0.0418646	-0.770122	0.0182212	-2.34522	0.000502574	-3.10796	1.03079e-05	-2.24374	0.000138387	-2.2373	0.00199991	-2.29827	0.000831288	-2.02574	0.000121498	-2.55043	0.000531177	0.0728666
malate	-0.594369	0.520805	0.382337	0.751766	-0.422274	0.86494	0.438269	0.569434	0.0180734	0.962346	-0.0795406	0.944836	-1.45434	0.00118846	0.453575	0.0713466	1.72687	0.228009	-0.421704	0.550223	0.0893111	0.878463	2.0696	0.017008	-1.05569	0.0171494	-1.70401	0.000516814	-2.80682	0.0273458	-2.07454	0.00118926	-1.74615	0.00869746	-3.65357	0.000106456	-2.51004	4.19129e-06	-1.25044	0.000741076	-1.07995	0.00365658	-2.49624	0.00149318	-1.65684	6.87479e-05	-1.58397	0.00398989	-0.648319
fumarate	-1.00937	0.125394	0.337263	0.783473	-0.548728	0.863408	0.329754	0.721171	-0.127432	0.750864	-0.0347236	0.986174	-1.76946	9.94022e-05	0.529079	0.112157	1.4659	0.323327	-0.430342	0.550223	0.0643833	0.912331	1.9799	0.0323973	-0.31584	0.398176	-1.04985	0.0324986	-1.95231	0.114979	-1.87245	0.000439544	-1.25983	0.0277764	-3.04829	0.00106009	-2.0853	0.000184558	-0.520771	0.130733	-0.486415	0.20192	-2.3028	0.00490903	-1.19545	0.00242528	-1.06838	0.0174732	-0.73401
citrate	-0.335281	0.563759	-0.230193	0.696306	-0.177454	0.890957	0.327499	0.521406	0.118284	0.60878	-0.449635	0.641474	-2.59411	5.89382e-06	-1.77378	0.000124593	0.360428	0.642539	-1.93133	0.00110268	-1.4253	0.000416568	0.0882464	0.825027	-0.857584	0.0665879	-0.638384	0.171673	-2.41689	0.00913232	-0.93997	0.0290649	-0.615682	0.0925013	-2.34144	0.000155544	-3.4517	1.65413e-05	-2.41216	0.000223311	-2.05646	0.00215065	-2.8713	4.95793e-05	-2.04098	0.000102168	-2.2532	0.000300187	0.2192
succinate	-1.27444	0.286028	-0.0268298	0.988258	0.506403	0.863408	0.0426149	0.959503	-0.466867	0.463917	-0.390943	0.79186	-2.46659	0.000522471	-0.828755	0.214432	0.810449	0.58761	-1.14953	0.251201	-1.26879	0.0245303	-0.086897	0.904552	-2.12484	0.000215755	-2.25872	0.00403161	-3.34527	0.0110044	-3.4063	0.000439544	-2.29257	0.000175583	-2.84588	0.000679488	-4.59143	3.6828e-07	-3.08748	5.82023e-07	-2.53482	0.0015578	-4.55584	0.000111558	-3.56137	5.665e-06	-2.93278	7.54697e-05	-0.133884
isocitric lactone	0.0437378	0.980205	-0.455246	0.562021	-0.155747	0.92063	0.261294	0.521406	-2.80867e-16	0.501799	-0.0390856	0.986174	-3.00045	4.08852e-05	-3.60268	4.00872e-06	-1.60763	0.130816	-2.78289	0.00021626	-3.14743	1.64474e-05	-1.49097	0.0319446	-3.51013	3.13969e-05	-2.9079	1.77469e-05	-4.49023	0.000484174	-2.90349	9.43106e-06	-2.80025	3.51338e-05	-4.08307	3.73882e-06	-6.51058	1.8369e-10	-6.51058	2.40209e-10	-6.09786	2.86968e-07	-5.68639	3.19024e-07	-5.94768	1.00907e-09	-5.57404	3.0065e-06	0.602231
alpha-ketoglutarate	0.0749203	0.887043	0.230716	0.82334	0.0307504	0.99045	0.426002	0.662839	-0.00789364	0.98533	0.166945	0.882436	-1.13635	0.000184496	-1.10706	0.0321305	-0.0862907	0.949641	-0.785271	0.336243	-1.34567	0.000842879	0.0499039	0.944162	-1.75728	0.000135054	-1.69377	0.00345943	-2.61596	0.0347463	-1.87165	8.61993e-05	-1.65235	0.000305665	-2.7745	0.000227175	-2.89363	1.52086e-06	-2.80083	1.2239e-05	-2.70225	1.61196e-05	-2.65692	0.00381656	-2.99802	2.4769e-07	-2.72459	0.000447282	0.0635073
citraconate/glutaconate	0.390374	0.520805	0.631139	0.44421	2.22758	0.0114058	1.10798	0.0735862	1.2688	0.0100768	1.05781	0.267954	-0.401834	0.183692	-0.803916	0.0399204	0.08834	0.723282	0.315774	0.386131	-0.166252	0.656083	-1.08143	0.0490092	0.755589	0.0450175	1.18143	0.0220734	0.776983	0.0698813	-0.704104	0.0350406	-0.0374963	0.900976	1.15449	0.000365849	0.353755	0.315446	0.377515	0.213048	0.865323	0.0137674	-0.38833	0.0661878	-0.203748	0.433149	0.0730666	0.87283	0.425842
thiamin (Vitamin B1)	-0.206642	0.817861	-0.044599	0.9877	-3.23097	0.413441	0.313813	0.572576	0.000968946	0.999557	-0.755372	0.641474	-3.40949	1.53883e-05	-2.46696	0.0162835	0.537967	0.715476	-2.88904	0.000714945	-2.42139	0.0160834	3.01356	0.0201096	-1.83966	0.000290751	-2.84894	0.00622743	-5.97892	0.00176909	-2.19574	0.000665705	-3.04298	0.00202766	-9.35933	5.8744e-07	-5.24915	1.95225e-07	-5.3159	4.503e-07	-5.44095	5.04926e-08	-5.08478	1.18027e-06	-5.46437	2.97893e-06	-6.34576	5.65592e-05	-1.00928
thiamin monophosphate	-0.392977	0.606539	0.322207	0.751117	0	NA	0	NA	0	NA	0	NA	-1.49738	0.0023168	-0.0558258	0.390824	0	NA	-1.1044	0.00255502	-0.378033	0.408512	0	NA	-2.22095	0.000425489	-3.6625	5.80345e-07	-3.71833	2.82872e-06	-1.79847	0.000716497	-2.52484	0.00116944	-2.90287	2.01791e-06	-3.71833	3.15205e-08	-3.71833	4.24375e-08	-3.71833	8.85842e-08	-2.90287	1.58122e-06	-2.90287	1.27843e-06	-2.90287	2.09991e-06	-1.44155
5-(2-Hydroxyethyl)-4-methylthiazole	-0.541349	0.606539	-0.337278	0.838006	-0.287364	0.793437	-0.396766	0.526224	-0.0895164	0.830457	-0.0816983	0.882436	-2.51586	0.00013624	-1.97188	0.00551528	-0.70235	0.184025	-2.37128	0.00763394	-1.72412	0.00949539	-0.496685	0.136489	-3.01665	4.76965e-05	-3.0913	0.000511665	-4.53921	3.65692e-05	-3.66359	0.000261736	-3.53416	0.000191023	-4.93216	7.54679e-07	-5.53251	2.11086e-07	-5.06318	2.02378e-07	-5.24156	3.33175e-07	-6.03487	1.41072e-06	-5.25828	2.70654e-07	-5.42885	2.27384e-07	-0.0746451
hydroxymethylpyrimidine	-0.437228	0.461991	-0.170553	0.959514	0.54997	0.793437	0.505406	0.629599	0.547694	0.198541	0.0426874	0.990811	-2.09064	0.0114399	-1.63754	0.0507639	0.182417	0.856776	-1.14801	0.0535153	-0.91929	0.101583	-0.324866	0.757908	-1.21817	0.00145948	-0.175527	0.805679	-1.92655	0.0210245	-0.824819	0.0545886	0.484503	0.401502	-0.545993	0.205445	-3.30881	0.000623407	-1.81306	0.000120999	-1.74413	0.00419558	-1.97283	0.00267719	-0.434787	0.198851	-0.870858	0.350056	1.04265
thiamin diphosphate	1.63722	0.16406	0	NA	1.33227e-15	0.696003	0.936867	0.521406	-0.235397	0.737587	0.0791101	0.965738	0.407601	0.358618	0.503438	0.250648	0.307144	0.538758	-0.292751	0.769915	0.268042	0.408512	0.386254	0.419685	-4.78744	3.94046e-07	-4.78744	3.16985e-07	-4.78744	2.5643e-06	-3.29084	0.00185873	-4.92806	6.52637e-06	-4.92806	1.5907e-06	-4.37984	8.57449e-06	-4.284	9.82792e-06	-4.48029	5.7055e-06	-3.58359	0.00194687	-4.66002	9.22582e-06	-4.5418	4.61904e-05	0
alpha-tocopherol	-0.410191	0.284678	0.126289	0.752447	-0.0424357	0.890957	-0.140751	0.601835	0.102656	0.702996	0.231517	0.641474	-0.69044	0.000424264	-0.578346	0.0330395	-0.374805	0.228009	-0.421001	0.172641	-0.601979	0.00296867	-0.100852	0.491094	-0.574698	0.00465003	-0.523181	0.0243205	-0.843579	0.00250782	-0.629005	0.0987518	-0.0410084	0.905978	-0.530131	0.099969	-1.26514	4.19812e-05	-1.10153	0.000771773	-1.21838	0.000493803	-1.05001	0.00957342	-0.642987	0.0466777	-0.630983	0.0571492	0.0515172
kynurenine	-0.662361	0.284678	0.197853	0.884324	0.811987	0.696003	0.321123	0.521406	0.146254	0.904322	-0.825394	0.641474	-2.11292	0.000238135	-0.0241132	0.976494	1.98736	0.0978735	-1.12944	0.013992	-0.075712	0.912331	0.349978	0.544745	1.09872	0.00340035	-0.521109	0.259717	-1.82496	0.00337009	0.412367	0.262412	-0.347246	0.324611	-1.03697	0.0354809	-1.0142	0.00757025	-0.545223	0.373574	0.162394	0.805812	-0.717069	0.0452474	-0.422958	0.481838	-0.68699	0.157855	-1.61983
tryptophan	0.363755	0.24445	0.787217	0.0853562	1.9373	0.146462	-0.23444	0.526224	1.27594	0.0128797	1.0891	0.511093	-1.75397	1.10896e-05	-2.26146	0.000252419	-0.91089	0.411969	-2.35217	0.00014681	-1.77274	3.99708e-06	-1.75909	0.00825652	-1.84162	1.53078e-06	-2.05074	2.56778e-05	-3.69672	0.000485321	-1.16445	8.85376e-05	-0.950114	5.36427e-05	-1.44601	1.33758e-05	-3.59559	6.20541e-09	-4.3122	2.9597e-07	-4.60761	1.74336e-05	-3.51662	1.18509e-06	-2.72285	7.08688e-09	-3.2051	8.94942e-05	-0.209122
oxindolylalanine	-0.226262	0.457994	0.375071	0.476165	1.42726	0.131716	0.397113	0.482832	0.321551	0.501799	0.203006	0.851508	-1.45013	3.93377e-05	-1.4187	0.0003783	-0.178829	0.710535	-0.826758	0.0131744	-1.47222	0.00360225	-1.40309	0.0288202	-0.966305	0.00108336	-1.38762	0.000767471	-2.63561	0.000193653	-1.06864	0.001199	-0.88862	0.00603686	-1.08442	0.00523671	-2.41644	3.26914e-06	-2.80631	1.09825e-06	-2.81444	1.64547e-05	-1.8954	8.78381e-05	-2.36084	8.78842e-05	-2.48751	0.000465357	-0.421311
kynurenate	-0.422558	0.384128	-0.726047	0.409972	0.362742	0.834533	0.0666081	0.939183	-0.530795	0.448054	-1.23887	0.16229	-3.23009	0.000238135	-1.2248	0.0164942	-0.15919	0.85155	-2.74092	0.00106272	-1.02955	0.0589681	-1.7608	0.000666209	-0.504586	0.00351139	-0.64869	0.0705004	-0.743013	0.211306	-0.279724	0.358637	-0.727317	0.0705531	0.267149	0.362433	-3.73467	4.54614e-05	-1.87349	8.74969e-05	-0.902203	0.0237099	-3.02064	0.000185128	-1.75687	0.00129878	-1.49365	0.000312675	-0.144104
3-hydroxyanthranilate	-0.278887	0.606539	0.051873	0.959514	-0.0792081	0.696003	0	NA	-0.0347028	0.501799	0	NA	-0.278887	0.383678	-0.0945308	0.542975	-0.0792081	0.436492	0	NA	-0.181107	0.408512	0	NA	-2.21535	0.000943823	-2.365	0.000182565	-2.41502	0.000520308	-2.51985	0.00873729	-2.33875	0.0162041	-2.51985	0.00718454	-2.49423	2.54106e-05	-2.45953	3.27607e-05	-2.49423	3.70562e-05	-2.51985	0.00654671	-2.51985	0.00674786	-2.51985	0.00697462	-0.149653
xanthurenate	-1.07473	0.24094	-0.564424	0.735367	-0.428138	0.83773	4.213e-16	0.521406	4.213e-16	0.501799	4.213e-16	0.641474	-1.6612	1.97344e-05	-0.887985	0.199334	-1.56687	0.0873849	-0.586476	0.253457	-0.323561	0.408512	-1.13873	0.0450855	-0.0865348	0.882411	-0.859754	0.314689	-0.180868	0.836004	-0.650597	0.221404	-0.913512	0.0696724	-0.0983395	0.863925	-1.74774	0.00757025	-1.74774	0.00794966	-1.74774	0.00853829	-1.23707	0.000433115	-1.23707	0.000448259	-1.23707	0.000465357	-0.773219
N-acetyltryptophan	0.0123445	0.99316	-0.219158	0.800231	0.785331	0.696003	-1.40433e-16	0.521406	0.290825	0.501799	0.0584872	0.922845	-1.79126	5.89382e-06	-2.30676	0.000329357	-1.53402	0.05789	-1.80361	0.000145199	-1.79678	0.00146429	-2.26086	4.28912e-05	-0.645492	0.0326214	-0.129994	0.761845	-0.736302	0.195771	-0.416983	0.126348	-0.132987	0.423627	0.265193	0.126242	-2.43675	3.44128e-06	-2.43675	3.86788e-06	-2.27032	5.07929e-05	-2.22059	4.06085e-07	-1.92976	0.000496633	-1.99567	3.32211e-05	0.515498
indolelactate	0.478684	0.672021	0.0986122	0.97812	-0.592857	0.825287	0.682269	0.590453	0.433895	0.501799	0.503246	0.641474	-0.168736	0.633802	-2.01034	0.0645771	-1.73767	0.0791243	0.0348494	0.971124	-1.67505	0.0908733	-0.641566	0.456246	-0.868108	0.341989	0.853348	0.495542	0.58068	0.612232	-3.28962	0.000563117	-1.94823	0.0253269	-2.91237	0.000870498	-1.03684	0.209324	-1.15699	0.168399	-1.15699	0.169758	-3.25477	0.00590644	-3.62329	9.80117e-05	-3.55394	0.000292328	1.72146
indoleacetate	-1.21759	0.0818187	-2.34112	0.02209	-0.0676438	0.945673	0	NA	0	NA	0	NA	-1.21759	0.00859208	-2.74553	4.41124e-05	-2.78977	0.00236795	0	NA	-0.404406	0.205481	-2.72213	7.40121e-06	-0.65602	0.152653	0.871915	0.0493327	0.916155	0.100252	-0.152402	0.392956	0.252004	0.480871	2.56972	9.95455e-06	-1.87361	3.64254e-05	-1.87361	4.01521e-05	-1.87361	5.15239e-05	-0.152402	0.361953	-0.152402	0.375707	-0.152402	0.387243	1.52793
tyrosine	-0.475731	0.32621	0.0776773	0.884324	0.952035	0.501184	-0.413949	0.250968	0.404093	0.0821433	0.222387	0.826377	-1.98325	3.56401e-05	-1.87915	2.08526e-05	-0.807704	0.362323	-1.92146	0.000145199	-1.55274	2.95779e-05	-1.53735	0.000221018	-1.65693	5.33877e-05	-1.82389	7.94842e-06	-2.90517	0.00032336	-0.979419	0.000829855	-0.592974	0.00169495	-0.799901	0.000256591	-3.64017	6.20541e-09	-3.70304	6.64359e-09	-3.71288	3.24827e-05	-2.90088	2.03192e-07	-2.14571	8.20244e-08	-2.33725	2.2746e-06	-0.166964
N-acetyltyrosine	-0.679559	0.515049	-0.344907	0.544685	-0.342086	0.807206	0.101456	0.868052	-0.0179367	0.965234	-0.416287	0.641474	-3.9783	4.25714e-05	-3.91903	3.70969e-06	-2.53807	0.00845283	-3.19728	0.000571545	-3.59206	5.16105e-06	-2.61227	0.0001148	-3.53348	0.000128837	-2.81741	2.14056e-05	-3.79844	0.000296625	-1.86441	0.000446937	-0.813689	0.00254089	-1.7919	3.0803e-06	-7.51177	3.3256e-09	-6.73644	2.35895e-08	-6.33651	1.32313e-07	-5.06169	2.19668e-06	-4.40575	1.68423e-08	-4.40417	9.19197e-07	0.716074
4-hydroxyphenylpyruvate	-1.16576	0.259745	-1.0146	0.339718	0.828997	0.696003	0.455651	0.521406	0.291599	0.501799	0.445725	0.641474	-1.38441	0.0182716	-2.07208	0.000514069	-1.40311	0.129615	0.236995	0.691717	-0.765887	0.19517	-1.78638	0.0178631	-0.639081	0.271358	0.0485881	0.91658	-0.620388	0.406327	-0.215004	0.603351	0.623826	0.274132	1.79844	0.00160192	-2.02349	6.80973e-05	-2.02349	7.5712e-05	-2.02349	9.43874e-05	0.0219906	0.968301	-0.142061	0.755146	0.0120642	0.984141	0.687669
o-Tyrosine	1.0759	0.462668	0.66022	0.685246	1.7243	0.24765	0.18367	0.90034	0.231806	0.89311	1.01344	0.641474	2.07099	0.0342416	0.852787	0.207131	0.740686	0.450793	1.17875	0.30176	0.424373	0.734951	0.0298257	0.968672	-0.165744	0.751273	0.461499	0.260925	-0.0232395	0.971718	0.98377	0.213807	1.19533	0.130097	1.77467	0.00224542	1.90524	0.0249641	1.31429	0.0467761	0.717447	0.204967	2.16252	0.0241922	1.6197	0.136984	1.8045	0.0370517	0.627242
3-(4-hydroxyphenyl)lactate (HPLA)	-1.44658	0.0644324	-0.369924	0.663027	-1.01084	0.696003	2.91684	0.213561	1.62144	0.00683516	0.262051	0.894459	-5.00414	3.46726e-06	-3.86143	1.33702e-06	-2.36923	0.0395767	-0.640719	0.617134	-1.87007	0.00296867	-1.09634	0.275479	-1.10646	0.0120952	-0.511206	0.0514382	-0.656143	0.267437	-1.837	0.000174595	-0.165088	0.639314	-0.950941	0.000762176	-6.1106	4.72643e-09	-4.37264	7.28883e-08	-3.02538	0.000105684	-2.47772	0.0615619	-2.03516	9.80117e-05	-2.04728	0.0319365	0.595257
tyrosol	-2.62583	0.0142575	-1.80171	0.127224	-2.19381	0.137037	0.41464	0.73002	-1.12614	0.0181389	-1.1931	0.357115	-3.47528	6.19793e-05	-1.46744	0.00898166	-1.52807	0.132874	-0.434806	0.622475	-0.791873	0.169299	-0.527353	0.339953	-2.04894	0.000963562	-2.27052	0.000595662	-1.47731	0.0414376	-3.45631	5.27545e-06	-2.85377	0.000524624	-2.45266	1.84612e-07	-5.52421	1.45688e-09	-3.73796	4.24375e-08	-3.00538	1.78954e-05	-3.89111	0.00112289	-3.64564	2.95443e-07	-2.98001	0.000143537	-0.221586
N-formylphenylalanine	0.2983	0.876302	1.07301	0.685246	2.90197	0.134812	0.108969	0.871584	0.414132	0.403965	0.92326	0.436479	-0.29924	0.644797	-1.40688	0.202191	-1.42243	0.19854	-0.488571	0.508317	-2.06576	0.00670902	-3.40114	0.000463962	0.529658	0.389019	1.40688	0.185813	1.42243	0.102508	0.414773	0.552951	2.0667	0.00691167	3.91122	1.02856e-05	0.230418	0.362714	0	NA	0	NA	-0.0737986	0.882528	0.000946038	0.998215	0.510074	0.409217	0.87722
ornithine	-0.481707	0.185974	1.49195	0.254842	2.0667	0.696003	-0.555007	0.165601	0.0539031	0.904322	0.324813	0.773537	-2.17632	6.37616e-06	0.744218	0.332412	1.4898	0.510405	-2.24962	7.03801e-05	-0.693828	0.00875141	-0.252085	0.675463	-0.525499	0.00702407	-3.34133	0.00109129	-5.15295	0.0146746	-1.16267	9.98449e-05	-2.00485	4.2822e-06	-3.24172	0.000324284	-2.70181	2.54928e-08	-2.59711	8.8506e-06	-3.66315	8.15849e-05	-3.41229	3.00599e-07	-2.69867	3.04971e-07	-3.4938	4.4939e-09	-2.81583
arginine	0.470859	0.606539	1.48785	0.108669	2.64291	0.131716	-0.159815	0.861115	1.53543	0.0359459	1.52785	0.462479	-0.0917984	0.79655	-0.404486	0.463032	0.549299	0.642539	-0.722472	0.383797	-0.356906	0.345002	-0.565763	0.4317	-2.53927	2.61969e-05	-3.47862	2.99047e-05	-4.65735	0.000500251	-2.15967	0.00170924	-2.08202	0.000299464	-2.10569	1.01563e-05	-2.63107	1.03079e-05	-3.8831	9.46871e-06	-4.10805	8.03474e-05	-2.88214	0.000640878	-2.43893	6.26898e-07	-2.67145	0.00231041	-0.939341
citrulline	0.0362948	0.980205	0.59391	0.409972	0.406146	0.863408	0.791179	0.521406	0.989402	0.101577	0.0640708	0.986174	-1.52739	0.000231763	-0.654589	0.0383875	0.308858	0.823239	-0.772507	0.378511	-0.259097	0.582751	-0.0332167	0.967024	-0.796191	0.00829112	-1.94008	0.000205351	-2.64661	0.0243569	-0.141701	0.671328	-0.727976	0.0350849	-1.62227	0.00321214	-2.32358	3.4199e-06	-2.59467	7.22528e-07	-2.33775	0.0010549	-0.914208	0.205679	-0.987073	0.0247467	-1.65548	0.0249034	-1.14389
3-amino-2-piperidone	-0.915189	0.0355813	-0.102654	0.963302	0.192986	0.93537	-0.716272	0.387417	-0.0344066	0.95638	-0.34356	0.511346	-2.63382	0.000184496	-2.03965	0.0110895	-1.05498	0.436492	-2.43491	5.66821e-05	-1.9714	0.000623383	-1.59152	0.00759763	-0.502974	0.0178397	-1.13375	0.067831	-2.23533	0.0585555	-0.774651	0.000728518	-0.592893	0.0330906	-1.39883	0.00551044	-3.1368	1.85228e-05	-3.1734	4.29668e-06	-3.2903	2.77068e-07	-3.20956	2.19659e-07	-2.56429	3.46813e-06	-2.99035	1.58228e-07	-0.630776
N-acetylarginine	0.965507	0.286375	1.26478	0.26908	1.18726	0.661177	1.27154	0.354101	1.58855	0.0156594	1.00684	0.641474	-3.56787	2.95262e-05	-3.55692	2.08526e-05	-0.797216	0.459499	-3.26184	0.00271858	-3.23314	0.00121781	-0.977634	0.231509	-1.24096	0.009354	-1.59907	0.0023549	-3.48671	0.00156255	-1.43802	0.00528973	-1.49686	0.0185424	-3.46203	2.04983e-08	-4.80882	2.4854e-07	-5.15598	9.9293e-08	-4.28393	4.51079e-05	-4.69986	5.18851e-05	-4.73	6.91422e-07	-4.43966	0.000154025	-0.35811
proline	-0.782561	0.0529662	0.120118	0.86901	0.263298	0.890957	-0.636624	0.508179	-0.0296152	0.925063	0.147385	0.871766	-1.62154	1.53883e-05	-0.73006	0.0214851	0.351971	0.723282	-1.4756	0.0164952	-0.879794	0.00407685	0.236059	0.641349	-0.743123	0.000349426	-1.57684	6.73688e-05	-3.02691	0.0049744	-1.16688	0.000239051	-1.09792	0.000804438	-2.40481	0.000174533	-2.36466	3.15205e-08	-2.3069	1.3997e-06	-2.67494	7.53121e-06	-2.64248	0.00026246	-1.97771	1.64407e-07	-2.16875	7.69972e-05	-0.833715
argininosuccinate	-0.449248	0.78324	2.30997	0.171416	0.143137	0.863408	1.02296	0.521406	1.90472	0.0394324	1.88054	0.466184	-1.13281	0.0401557	0.286283	0.552165	0.746864	0.377789	0.339401	0.774911	-0.118968	0.912066	2.48426	0.0450855	-4.74792	3.21683e-05	-6.13176	2.01464e-06	-6.29487	2.63263e-06	-5.63304	8.67449e-05	-4.25766	0.00146913	-6.5876	2.58083e-07	-5.88073	1.93775e-07	-5.84548	1.29744e-06	-5.548	1.46113e-05	-5.29364	0.000510281	-4.37663	1.20483e-05	-4.10334	0.00197686	-1.38384
urea	-1.39991	0.0619846	-1.59942	0.0286501	-1.67993	0.371856	-1.59772	0.165601	-1.03566	0.0500155	-1.75961	0.249465	-2.9841	9.66165e-06	-1.42636	0.00366379	-1.15623	0.129615	-3.18192	0.00180128	-0.862599	0.0207018	-1.23591	0.163177	-0.687503	0.00601974	-1.29201	0.00334718	-1.59182	0.0075972	-1.41152	0.004348	-2.21554	9.41155e-06	-2.59586	0.000524537	-3.67161	6.14008e-07	-2.71837	3.68013e-06	-2.74805	3.64433e-05	-4.59344	3.09361e-05	-3.07814	2.9604e-06	-3.83177	0.000147492	-0.604508
argininate*	0.028986	0.99316	0.307209	0.838006	-0.00441737	0.999315	0.708013	0.521406	1.45607	0.0673054	1.34198	0.425692	-1.17836	0.12357	-0.388169	0.390824	-0.469556	0.436492	-0.499329	0.555273	0.760692	0.272356	0.876839	0.361616	-4.97521	0.000120184	-5.89708	4.70442e-06	-5.8157	3.02146e-05	-4.79041	3.72141e-05	-5.43406	7.02597e-06	-5.6643	8.97968e-07	-6.15357	1.19327e-09	-6.28525	4.60751e-12	-6.28525	4.62458e-12	-5.28974	4.19069e-05	-4.67337	1.35924e-05	-4.78746	0.000147492	-0.921872
hydroxyproline	-0.396218	0.580888	-0.230604	0.77033	-0.198645	0.843175	-0.17809	0.521406	-0.165418	0.250287	-0.248023	0.379858	-2.26985	5.6361e-05	-1.12086	0.00171255	-1.20929	0.049994	-2.05172	0.000310379	-1.05567	0.00559264	-1.25866	5.13849e-05	-2.46916	4.63212e-05	-3.19995	4.38495e-06	-3.09733	0.000218404	-2.25537	7.99015e-05	-2.82055	3.51338e-05	-2.68597	3.17164e-07	-4.73901	7.95236e-10	-4.32081	3.33877e-09	-4.30661	7.29662e-09	-4.30709	4.01801e-08	-3.87622	3.40024e-09	-3.94463	2.48215e-08	-0.730788
N-acetylproline	-0.437623	0.520805	-0.577046	0.685246	0.572596	0.863408	0.382156	0.796366	0.614725	0.0295578	0.181894	0.906756	-1.63622	0.000463067	-1.12492	0.0799943	-0.214175	0.91393	-0.816442	0.455551	0.0668533	0.806661	-0.604877	0.33511	-0.877336	0.0111927	-0.459189	0.429142	-1.43546	0.307421	-0.947244	0.00906918	-0.66852	0.0211648	-0.495147	0.148915	-2.51356	1.88585e-06	-1.58411	1.27803e-05	-1.64963	0.0247253	-1.76369	0.101523	-0.601667	0.00478729	-1.10002	0.0283233	0.418147
N-acetylcitrulline	-0.470753	0.606539	-0.398814	0.685246	0	NA	0.788425	0.508179	-0.133261	0.516019	0.302974	0.641474	-0.470753	0.383678	-0.261527	0.59319	0	NA	0.788425	0.226939	0.00402532	0.408512	0.302974	0.419685	-3.84772	0.000377643	-3.91966	0.000235139	-4.31847	7.31974e-05	-1.69645	0.0714642	-1.69645	0.079144	-1.69645	0.0661606	-4.31847	2.35806e-06	-4.18118	5.52268e-06	-4.31847	4.12176e-06	-0.908028	0.361953	-1.69243	0.063042	-1.39348	0.149886	-0.0719396
N-monomethylarginine	-0.223676	0.778587	-0.464616	0.451572	-0.46244	0.825287	0.537971	0.521406	1.1839	0.0631097	0.174974	0.912794	-4.0033	3.48447e-07	-4.36017	4.00872e-06	-2.59143	0.0660701	-3.24165	0.00102439	-2.71165	0.000311581	-1.95402	0.0161867	-2.20735	1.28713e-05	-1.62025	3.45715e-05	-2.41388	0.0101044	-1.67104	0.00145225	-1.32488	0.001702	-2.11634	5.65392e-06	-6.21065	3.33396e-11	-5.98042	4.42684e-08	-5.00532	1.00158e-05	-4.91269	8.81426e-06	-4.03654	1.09464e-06	-4.07036	9.73645e-05	0.587096
dimethylarginine (ADMA + SDMA)	-0.202615	0.754006	-0.0375145	0.971655	0.170991	0.890957	0.697039	0.521406	1.06077	0.00165958	0.201766	0.880264	-3.94296	6.40292e-07	-3.9013	7.9944e-07	-1.99976	0.0480973	-3.0433	0.0014868	-2.80302	7.43485e-05	-1.96899	0.0108311	-2.48514	6.22535e-06	-1.84763	1.38695e-05	-2.65704	0.00160147	-2.01887	0.000146505	-1.21626	0.00350069	-1.81717	1.03546e-05	-6.4281	2.00793e-11	-5.74894	4.42817e-10	-4.65681	9.95722e-07	-5.06218	1.36188e-05	-4.01928	4.47798e-09	-3.78616	8.72427e-05	0.637507
2-oxoarginine*	0.953871	0.548522	1.02437	0.675497	3.38263	0.037523	1.07527	0.521406	2.36744	0.0665295	2.45007	0.341607	0.463628	0.43687	-1.16553	0.169188	-1.09583	0.233546	0.585031	0.650397	0.177539	0.873133	-2.0284	0.108358	-3.95347	3.25145e-05	-3.55865	0.00195312	-3.34931	0.000874702	-2.34242	0.0151906	-1.8771	0.0192371	0.690497	0.0913725	-3.48984	8.7598e-05	-4.72418	3.04782e-08	-4.44515	7.39716e-06	-1.75738	0.109569	-1.69956	0.0589165	-1.3379	0.215138	0.394815
N-methylproline	0.233032	0.872164	-0.168029	0.959514	0.53703	0.818066	0.122348	0.521406	0.639375	0.240586	0.267735	0.641474	-0.910958	0.0975708	-1.26001	0.112784	-2.06239	0.0784966	-1.02164	0.0580164	-0.452605	0.437933	-2.33168	0.000459223	0.23604	0.718607	0.58509	0.469997	1.38747	0.142805	-0.00699018	0.98972	-0.0590011	0.935122	1.44844	0.0121826	-0.674919	0.087571	-0.674919	0.0903199	-0.674919	0.0923102	-1.02863	0.0418694	-0.511606	0.366191	-0.883246	0.121035	0.349051
N-delta-acetylornithine	-5.61733e-16	0.606539	-0.320598	0.853762	1.22089	0.696003	-5.61733e-16	0.521406	-5.61733e-16	0.501799	0.140466	0.613383	-5.61733e-16	0.383678	-0.668672	0.315875	-1.34312	0.227239	-5.61733e-16	0.410238	-0.348074	0.214914	-2.42354	3.47238e-05	-2.22271	1.2906e-06	-1.55404	0.0334779	-0.879585	0.302172	-2.48008	1.00624e-07	-2.13201	0.000109712	0.0839276	0.698882	-2.22271	1.11982e-07	-2.22271	1.45871e-07	-2.22271	2.72418e-07	-2.48008	1.02931e-08	-2.48008	4.61944e-09	-2.33962	4.32903e-07	0.668672
N,N,N-trimethyl-alanylproline betaine (TMAP)	1.13287	0.612559	-0.333649	0.685246	-0.262225	0.863408	0.622643	0.65205	3.69341	6.60922e-05	0.00656894	0.997711	-4.23766	0.010896	-7.34689	1.22706e-08	-2.75965	0.0464042	-4.74789	0.00207738	-3.31983	0.000156215	-2.49085	0.0824855	-4.75072	0.00512292	-1.84934	4.06866e-05	-2.76576	0.00160611	-2.83814	4.14864e-05	-1.40328	0.00236449	-2.24828	3.85689e-05	-8.98838	1.80281e-09	-9.19622	4.7994e-12	-5.5254	1.57426e-05	-7.58603	3.8988e-05	-4.7231	3.02917e-07	-4.73913	0.00218478	2.90139
N-alpha-acetylornithine	0.17378	0.828155	0.187344	0.774533	0.185312	0.863408	0.573363	0.365347	1.30905	0.0166571	0.0109678	0.990811	-2.14654	0.000324958	-2.96841	1.26177e-05	-0.841812	0.277178	-1.74695	0.00084253	-1.8467	0.000944847	-1.01616	0.0454674	-2.77068	3.00966e-05	-1.36897	0.000178292	-2.40636	0.000514029	-2.3625	5.96482e-05	-0.947215	0.00579132	-1.98664	0.000240925	-4.91722	1.2929e-07	-4.33738	1.64039e-07	-3.24817	5.28034e-05	-4.10945	4.2868e-08	-2.79392	1.85517e-06	-3.0028	4.00019e-06	1.40172
pyridoxamine phosphate	-0.244053	0.790404	0.638168	0.216703	0.0116058	0.997772	-0.340789	0.527316	0.642058	0.501799	-0.765741	0.641474	-1.92076	0.000263151	-1.71414	0.0216938	0.832332	0.499839	-2.0175	0.00551508	-1.71025	0.00435396	0.054985	0.94697	-2.16608	4.13039e-05	-2.92747	5.11147e-07	-5.41692	0.000623611	-2.38134	0.000375545	-2.2605	4.72794e-05	-5.37652	1.62063e-05	-4.08684	5.2936e-08	-4.64161	3.47021e-05	-4.58459	3.69229e-06	-4.39883	2.26143e-06	-3.97075	3.20342e-06	-5.32153	6.84775e-06	-0.761382
pyridoxine (Vitamin B6)	-0.282509	0.24094	-0.465296	0.44421	0.189897	0.863408	-0.63697	0.0925735	0.118171	0.709541	-0.264147	0.648175	-1.78614	1.41285e-05	-1.70012	0.000699534	-0.981182	0.200702	-2.1406	1.3248e-05	-1.11665	0.00144917	-1.43523	0.000431393	0.00179809	0.992251	0.173364	0.542218	-0.334932	0.49411	-0.164329	0.570591	-0.175551	0.596335	-0.0286534	0.937408	-1.78434	3.80974e-06	-1.52676	2.61684e-05	-1.31611	0.000845885	-2.30493	4.59503e-05	-1.2922	0.0027128	-1.46388	0.00178671	0.171566
pyridoxal phosphate	0.0685499	0.606539	0.0837686	0.685246	-3.33067e-16	0.696003	0.0439491	0.521406	0.140225	0.501799	0.102994	0.641474	1.40433e-16	0.383678	1.40433e-16	0.390824	-3.33067e-16	0.436492	-0.0246008	0.794016	0.0564565	0.781887	0.102994	0.419685	-2.05841	1.39542e-06	-2.05841	1.08426e-06	-2.05841	1.0766e-05	-1.66366	6.09161e-06	-1.64844	7.31687e-06	-1.73221	1.40679e-07	-2.05841	1.40108e-07	-2.05841	1.82141e-07	-2.05841	3.1688e-07	-1.68826	2.95684e-07	-1.59199	1.91025e-05	-1.62922	4.83823e-06	1.40433e-16
pyridoxamine	0.241896	0.818472	-0.141645	0.886256	0.548262	0.831764	-0.156105	0.730444	0.361452	0.503928	-0.192307	0.871766	-2.95973	1.74808e-05	-3.20057	1.79132e-05	-2.06821	0.115692	-3.35774	0.000441996	-2.69747	0.00079783	-2.80878	0.00105183	-3.20447	1.43375e-05	-1.77998	0.000194318	-2.65149	0.0128146	-2.58311	0.000420385	-1.54217	0.00103735	-1.72376	0.00117687	-6.16421	5.26174e-09	-4.98055	7.02914e-08	-4.7197	3.03509e-06	-5.94085	1.18452e-07	-4.23964	3.48096e-06	-4.53255	3.09553e-06	1.42449
[truncated: 33 more columns]

## Sheet: Biofilm.metabolite.media.result
	log2FC.bf.stp2.Normoxia.8.h.vs.bf.WT.Normoxia.8.h	p.value.bf.stp2.Normoxia.8.h.vs.bf.WT.Normoxia.8.h	log2FC.bf.stp2.Normoxia.24.h.vs.bf.WT.Normoxia.24.h	p.value.bf.stp2.Normoxia.24.h.vs.bf.WT.Normoxia.24.h	log2FC.bf.stp2.Normoxia.48.h.vs.bf.WT.Normoxia.48.h	p.value.bf.stp2.Normoxia.48.h.vs.bf.WT.Normoxia.48.h	log2FC.bf.stp2.Hypoxia.8.h.vs.bf.WT.Hypoxia.8.h	p.value.bf.stp2.Hypoxia.8.h.vs.bf.WT.Hypoxia.8.h	log2FC.bf.stp2.Hypoxia.24.h.vs.bf.WT.Hypoxia.24.h	p.value.bf.stp2.Hypoxia.24.h.vs.bf.WT.Hypoxia.24.h	log2FC.bf.stp2.Hypoxia.48.h.vs.bf.WT.Hypoxia.48.h	p.value.bf.stp2.Hypoxia.48.h.vs.bf.WT.Hypoxia.48.h	log2FC.bf.WT.Hypoxia.8.h.vs.bf.WT.Normoxia.8.h	p.value.bf.WT.Hypoxia.8.h.vs.bf.WT.Normoxia.8.h	log2FC.bf.WT.Hypoxia.24.h.vs.bf.WT.Normoxia.24.h	p.value.bf.WT.Hypoxia.24.h.vs.bf.WT.Normoxia.24.h	log2FC.bf.WT.Hypoxia.48.h.vs.bf.WT.Normoxia.48.h	p.value.bf.WT.Hypoxia.48.h.vs.bf.WT.Normoxia.48.h	log2FC.bf.stp2.Hypoxia.8.h.vs.bf.stp2.Normoxia.8.h	p.value.bf.stp2.Hypoxia.8.h.vs.bf.stp2.Normoxia.8.h	log2FC.bf.stp2.Hypoxia.24.h.vs.bf.stp2.Normoxia.24.h	p.value.bf.stp2.Hypoxia.24.h.vs.bf.stp2.Normoxia.24.h	log2FC.bf.stp2.Hypoxia.48.h.vs.bf.stp2.Normoxia.48.h	p.value.bf.stp2.Hypoxia.48.h.vs.bf.stp2.Normoxia.48.h	log2FC.bf.WT.Normoxia.24.h.vs.bf.WT.Normoxia.8.h	p.value.bf.WT.Normoxia.24.h.vs.bf.WT.Normoxia.8.h	log2FC.bf.WT.Normoxia.48.h.vs.bf.WT.Normoxia.8.h	p.value.bf.WT.Normoxia.48.h.vs.bf.WT.Normoxia.8.h	log2FC.bf.WT.Normoxia.48.h.vs.bf.WT.Normoxia.24.h	p.value.bf.WT.Normoxia.48.h.vs.bf.WT.Normoxia.24.h	log2FC.bf.stp2.Normoxia.24.h.vs.bf.stp2.Normoxia.8.h	p.value.bf.stp2.Normoxia.24.h.vs.bf.stp2.Normoxia.8.h	log2FC.bf.stp2.Normoxia.48.h.vs.bf.stp2.Normoxia.8.h	p.value.bf.stp2.Normoxia.48.h.vs.bf.stp2.Normoxia.8.h	log2FC.bf.stp2.Normoxia.48.h.vs.bf.stp2.Normoxia.24.h	p.value.bf.stp2.Normoxia.48.h.vs.bf.stp2.Normoxia.24.h	log2FC.bf.WT.Hypoxia.24.h.vs.bf.WT.Hypoxia.8.h	p.value.bf.WT.Hypoxia.24.h.vs.bf.WT.Hypoxia.8.h	log2FC.bf.WT.Hypoxia.48.h.vs.bf.WT.Hypoxia.8.h	p.value.bf.WT.Hypoxia.48.h.vs.bf.WT.Hypoxia.8.h	log2FC.bf.WT.Hypoxia.48.h.vs.bf.WT.Hypoxia.24.h	p.value.bf.WT.Hypoxia.48.h.vs.bf.WT.Hypoxia.24.h	log2FC.bf.stp2.Hypoxia.24.h.vs.bf.stp2.Hypoxia.8.h	p.value.bf.stp2.Hypoxia.24.h.vs.bf.stp2.Hypoxia.8.h	log2FC.bf.stp2.Hypoxia.48.h.vs.bf.stp2.Hypoxia.8.h	p.value.bf.stp2.Hypoxia.48.h.vs.bf.stp2.Hypoxia.8.h	log2FC.bf.stp2.Hypoxia.48.h.vs.bf.stp2.Hypoxia.24.h	p.value.bf.stp2.Hypoxia.48.h.vs.bf.stp2.Hypoxia.24.h	log2FC.normoxia.stp2d.vs.WT
S-adenosylhomocysteine (SAH)	2.80867e-16	0.477247	-0.252884	0.502092	0.00130843	0.998	2.80867e-16	0.492124	-0.927414	0.222812	-0.951348	0.0505085	2.80867e-16	0.383154	1.51159	0.0296072	-1.29914	0.0483271	2.80867e-16	0.405935	0.837059	0.014188	-2.2518	0.00053025	0.252884	0.413127	5.02719	3.45432e-05	4.77431	0.000590277	2.80867e-16	0.42522	5.0285	2.63195e-08	5.0285	5.81189e-08	1.76447	0.0138244	3.72806	1.31795e-08	1.96358	0.00779695	0.837059	0.0303297	2.77671	0.000116273	1.93965	0.00647656	-0.0838584
lanthionine	0.041925	0.934969	0.0290307	0.659877	-0.918577	0.0192765	-0.321439	0.364992	-0.00774746	0.985252	-0.160681	0.828477	0.0987475	0.783581	0.18112	0.413895	-3.34809	0.000252905	-0.264616	0.405935	0.144342	0.506059	-2.59019	1.33134e-05	-0.21124	0.436616	3.60801	1.55114e-05	3.81925	1.92256e-05	-0.224134	0.502087	2.64751	5.1515e-05	2.87165	2.1438e-07	-0.128867	0.716947	0.16118	0.755349	0.290048	0.600707	0.184824	0.465792	0.321938	0.259424	0.137114	0.694177	-0.28254
guanosine 2'-monophosphate (2'-GMP)*	5.61733e-16	0.477247	-1.06824	0.0682762	-1.40566	0.0690318	5.61733e-16	0.492124	5.61733e-16	0.46946	5.61733e-16	0.478629	5.61733e-16	0.383154	-1.06824	0.0288555	-4.80576	4.39045e-06	5.61733e-16	0.405935	5.61733e-16	0.385685	-3.4001	5.77107e-05	1.06824	0.0420496	4.80576	4.78958e-06	3.73752	0.000811836	5.61733e-16	0.42522	3.4001	6.1003e-05	3.4001	0.000134707	5.61733e-16	0.409898	5.61733e-16	0.409325	5.61733e-16	0.435335	5.61733e-16	0.465792	5.61733e-16	0.437448	5.61733e-16	0.436077	-0.824633
putrescine	-0.251518	0.477247	-1.16256	0.123251	-0.763617	0.192244	-0.0322549	0.492124	-0.798872	0.21771	-2.25597	0.00203171	-0.219263	0.450194	-0.363686	0.616402	-1.39323	0.0089234	8.426e-16	0.405935	8.426e-16	0.385685	-2.88558	0.000359136	0.911039	0.19872	4.64046	2.44961e-05	3.72942	0.00180124	8.426e-16	0.42522	4.12836	1.93986e-07	4.12836	5.06245e-07	0.766617	0.207122	3.4665	2.45956e-08	2.69988	0.0012322	8.426e-16	0.465792	1.24278	0.0277134	1.24278	0.0337303	-0.725897
nicotinamide ribonucleotide (NMN)	-0.213403	0.437154	-0.742917	0.126377	-0.0552809	0.954381	-1.40433e-16	0.492124	-1.40433e-16	0.46946	-0.969068	0.00861591	-0.213403	0.304153	-0.742917	0.0627351	-3.39541	0.000311572	-1.40433e-16	0.405935	-1.40433e-16	0.385685	-4.3092	2.72626e-07	0.529514	0.243199	4.21566	6.01759e-05	3.68614	0.0011222	-1.40433e-16	0.42522	4.37378	8.58899e-08	4.37378	2.07398e-07	-1.40433e-16	0.409898	1.03365	0.002629	1.03365	0.00404743	-1.40433e-16	0.465792	0.0645839	0.437448	0.0645839	0.436077	-0.337201
tetradecadienoate (14:2)*	0.0784659	0.477247	0.0726462	0.502092	0.223545	0.824892	0.0909564	0.492124	-0.986446	0.293819	-0.404687	0.491432	0	NA	0.986446	0.186139	-3.05083	0.00266053	0.0124906	0.94955	-0.0726462	0.385685	-3.67906	1.62283e-06	0	NA	3.65763	0.000194494	3.65763	0.000811836	-0.00581963	0.965245	3.8027	1.88411e-08	3.80852	3.06502e-08	0.986446	0.256553	0.606794	0.200282	-0.379652	0.671562	-0.0909564	0.465792	0.111151	0.733966	0.202108	0.436077	0.124886
choline	0.497177	0.298025	-1.28092	0.0665748	0.270557	0.635394	-0.152201	0.909184	-0.985304	0.121784	-0.269811	0.629354	0.860722	0.144593	1.27359	0.0251256	-1.20605	0.0307828	0.211344	0.685703	1.56921	0.0146371	-1.74642	0.00104966	1.69681	0.0073807	5.22684	4.61287e-06	3.53003	0.000995038	-0.0812911	0.856436	5.00022	6.69925e-07	5.08151	5.78127e-07	2.10968	0.00912684	3.16006	0.000603597	1.05039	0.0272739	1.27657	0.0908001	3.04245	0.00038122	1.76588	0.022376	-0.171062
N6-acetyllysine	5.61733e-16	0.477247	-1.85125	0.0535988	-0.780572	0.31775	5.61733e-16	0.492124	5.61733e-16	0.46946	-1.6994	0.0076533	5.61733e-16	0.383154	-1.85125	0.0215195	-2.72081	0.00357781	5.61733e-16	0.405935	5.61733e-16	0.385685	-3.63964	7.04401e-06	1.85125	0.0320393	5.33573	3.07257e-05	3.48448	0.0102109	5.61733e-16	0.42522	4.55516	1.59471e-08	4.55516	3.06502e-08	5.61733e-16	0.409898	2.61492	4.35691e-05	2.61492	0.000144674	5.61733e-16	0.465792	0.915525	0.0181608	0.915525	0.0246987	-0.877276
guanosine 3'-monophosphate (3'-GMP)	0.179622	0.477247	-2.27471	0.0320454	-1.14895	0.0946012	-5.61733e-16	0.492124	-5.61733e-16	0.46946	-0.204312	0.478629	-5.61733e-16	0.383154	-2.78168	0.00016909	-5.88531	3.9738e-06	-0.179622	0.405935	-0.506978	0.385685	-4.94067	1.76566e-06	2.78168	0.000428907	6.08962	1.86724e-06	3.30794	0.0011222	0.327356	0.623408	4.76105	4.09186e-06	4.43369	0.000434565	-5.61733e-16	0.409898	0.204312	0.409325	0.204312	0.435335	-5.61733e-16	0.465792	-5.61733e-16	0.437448	-5.61733e-16	0.436077	-1.08135
dimethylarginine (ADMA + SDMA)	2.80867e-16	0.477247	0.31158	0.502092	0.573451	0.298806	2.80867e-16	0.492124	2.80867e-16	0.46946	-0.466117	0.107425	2.80867e-16	0.383154	2.80867e-16	0.386862	-2.81434	0.000419695	2.80867e-16	0.405935	-0.31158	0.385685	-3.85391	8.89509e-09	2.80867e-16	0.413127	3.28046	6.69582e-05	3.28046	0.000557223	0.31158	0.42522	3.85391	6.70676e-09	3.54233	4.54126e-05	2.80867e-16	0.409898	0.466117	0.077725	0.466117	0.0940187	2.80867e-16	0.465792	2.80867e-16	0.437448	2.80867e-16	0.436077	0.29501
histidine	1.55582	0.152997	1.58624	0.191256	0.475452	0.548562	0.820643	0.00223271	1.8507	0.0243047	1.54953	0.00199226	4.61779	3.20442e-08	2.2344	0.0104154	-0.474703	0.47428	3.88261	0.00168946	2.49885	0.018734	0.599378	0.00257387	0.821994	0.0739499	3.97893	0.000147562	3.15693	0.00441094	0.852412	0.492314	2.89855	0.00614302	2.04614	0.0493309	-1.5614	0.0376881	-1.11357	0.00544721	0.447833	0.528089	-0.531345	0.0646842	-0.384677	0.0817897	0.146668	0.495924	1.20584
cysteinylglycine disulfide*	-1.40433e-16	0.477247	-0.466481	0.074197	-1.74699	0.0129704	-1.40433e-16	0.492124	0.00267656	0.46946	-1.62886	0.00795194	-1.40433e-16	0.383154	-0.466481	0.0328039	-1.94306	0.00764047	-1.40433e-16	0.405935	0.00267656	0.385685	-1.82494	0.000275528	0.466481	0.0463567	3.57192	1.7576e-05	3.10544	0.000562436	-1.40433e-16	0.42522	1.82494	0.000307673	1.82494	0.000617641	-1.40433e-16	0.409898	1.62886	0.00442487	1.62886	0.00666563	0.00267656	0.465792	-1.40433e-16	0.437448	-0.00267656	0.436077	-0.737823
adenosine	0.134443	0.843505	-1.10076	0.0216601	-0.265983	0.612529	-0.562991	0.122395	-1.22851	0.0345376	-1.452	0.00993748	-0.71275	0.0597002	-0.0822287	0.841129	-0.194957	0.577032	-1.41018	0.0241415	-0.20998	0.475757	-1.38097	0.00984702	2.14968	0.00198448	5.11864	7.71272e-06	2.96896	0.000696092	0.914484	0.0874566	4.71821	8.42701e-06	3.80373	5.13474e-07	2.7802	0.000121154	5.63643	2.0184e-09	2.85623	0.000118812	2.11469	0.00260282	4.74743	1.66497e-05	2.63274	0.00215829	-0.410766
3'-AMP	0	NA	-0.0450207	0.502092	-1.14718	0.118211	0	NA	0	NA	0	NA	0	NA	-0.0450207	0.386862	-2.989	0.000174972	0	NA	0	NA	-1.84182	0.000781698	0.0450207	0.413127	2.989	0.000147562	2.94398	0.000772229	0	NA	1.84182	0.00088715	1.84182	0.00173394	0	NA	0	NA	0	NA	0	NA	0	NA	0	NA	-0.3974
glycerophosphoinositol*	0.23799	0.526033	-0.300173	0.526002	-0.344868	0.50534	-0.0906954	0.492124	0.159821	0.46946	-0.466931	0.368733	-0.811373	0.0209362	-1.13105	0.00185013	-2.01809	0.000760498	-1.14006	0.00026996	-0.671052	0.0714032	-2.14015	0.000620487	0.228977	0.534712	3.09608	5.26073e-05	2.8671	0.000557223	-0.309187	0.42522	2.51322	3.99294e-05	2.8224	0.00014374	-0.0906954	0.409898	1.88936	0.000141613	1.98005	0.000190557	0.159821	0.465792	1.51312	0.00171508	1.3533	0.0124111	-0.135684
spermidine	0.209921	0.73337	-1.20845	0.0993844	-0.0596208	0.954381	5.61733e-16	0.492124	-0.188656	0.46946	-2.15083	0.0121756	-0.280385	0.383154	-3.44916	5.02812e-05	-2.23419	0.00672312	-0.490306	0.222866	-2.42937	0.00065587	-4.3254	8.0394e-05	3.4303	0.00037649	6.22268	2.29043e-05	2.79238	0.00665564	2.01193	0.0147808	5.95314	5.89292e-07	3.94121	6.53822e-05	0.261521	0.285086	4.26887	6.36597e-07	4.00735	1.98532e-05	0.0728652	0.465792	2.11804	0.00663563	2.04518	0.0129485	-0.352718
UMP	-0.0229089	0.477247	-0.21945	0.696722	-0.159554	0.879487	-1.40433e-16	0.492124	-1.40433e-16	0.46946	-1.14057	0.0112097	-0.0229089	0.383154	-0.747303	0.0650628	-1.95414	0.00492651	-1.40433e-16	0.405935	-0.527853	0.0242093	-2.93516	2.82224e-05	0.724394	0.0938502	3.40817	0.000118842	2.68378	0.0053798	0.527853	0.0447751	3.27153	6.86596e-07	2.74367	4.34542e-05	-1.40433e-16	0.409898	1.47694	6.82738e-05	1.47694	0.000209075	-1.40433e-16	0.465792	0.336367	0.280146	0.336367	0.287518	-0.133971
3-ureidopropionate	0	NA	-0.341548	0.360538	-0.425216	0.486814	0	NA	-0.0968495	0.46946	-0.391719	0.467727	0	NA	-0.244699	0.403125	-2.45408	0.00213934	0	NA	0	NA	-2.42059	2.37473e-05	0.341548	0.261231	3.00915	5.52155e-05	2.6676	0.00139162	0	NA	2.58393	7.30393e-06	2.58393	2.05971e-05	0.0968495	0.409898	0.555065	0.202582	0.458215	0.33767	0	NA	0.163346	0.262186	0.163346	0.267103	-0.255588
N6,N6-dimethyladenosine	1.40433e-16	0.477247	-0.278195	0.502092	-0.357539	0.058216	1.40433e-16	0.492124	-0.0870419	0.30838	-1.64423	3.64092e-05	1.40433e-16	0.383154	-0.191154	0.559016	-1.1612	1.4464e-06	1.40433e-16	0.405935	1.40433e-16	0.385685	-2.44789	3.28347e-06	0.278195	0.413127	2.93788	2.24107e-10	2.65968	0.000557223	1.40433e-16	0.42522	2.58034	1.49313e-07	2.58034	4.30876e-07	0.0870419	0.272457	1.77668	7.84399e-09	1.68963	3.08655e-06	1.40433e-16	0.465792	0.132451	0.437448	0.132451	0.436077	-0.211911
5,6-dihydrouridine	1.40433e-16	0.477247	0.0848998	0.73341	-0.0773367	0.911836	1.40433e-16	0.492124	1.40433e-16	0.46946	-0.991985	0.00067588	1.40433e-16	0.383154	-0.0585335	0.386862	-1.60168	0.00325808	1.40433e-16	0.405935	-0.143433	0.385685	-2.51633	1.38376e-06	0.0585335	0.413127	2.68244	0.000101245	2.6239	0.00067551	0.143433	0.42522	2.6051	1.39836e-07	2.46167	1.11967e-05	1.40433e-16	0.409898	1.08076	3.04405e-05	1.08076	0.000118263	1.40433e-16	0.465792	0.0887707	0.437448	0.0887707	0.436077	0.00252102
N-acetylthreonine	0.134477	0.477247	0.606082	0.610223	0.474465	0.34408	-2.80867e-16	0.492124	-2.80867e-16	0.46946	0.758587	0.014347	-2.80867e-16	0.383154	-1.57103	0.0217486	-1.28268	0.0139066	-0.134477	0.405935	-2.17711	0.0103044	-0.998554	0.00034371	1.57103	0.0324174	4.15924	1.0403e-05	2.58821	0.0124186	2.04263	0.0305159	4.49922	2.99909e-08	2.45659	0.00788087	-2.80867e-16	0.409898	2.87656	3.62143e-07	2.87656	4.68982e-06	-2.80867e-16	0.465792	3.63515	1.92702e-07	3.63515	9.63509e-07	0.405008
pipecolate	1.12347e-15	0.477247	-1.85761	0.00468569	-0.915981	0.0281623	-0.0883245	0.937356	-2.89906	0.0145809	-1.71073	0.00473716	0.317322	0.383154	1.9941	0.0182415	1.16254	0.00314243	0.228998	0.405935	0.952645	0.133299	0.367784	0.415912	1.9452	0.00150172	4.44905	9.96697e-07	2.50385	0.00139162	0.08759	0.333058	3.53307	1.00367e-07	3.44548	5.06245e-07	3.62197	0.00193934	5.29426	1.62912e-06	1.67229	0.0288846	0.811237	0.355162	3.67185	8.75764e-05	2.86062	0.00690884	-0.92453
N-acetylcysteine	2.80867e-16	0.477247	2.80867e-16	0.502092	-0.357306	0.763742	-0.197073	0.364992	-1.01905	0.103729	-1.45488	0.000972373	0.197073	0.215474	1.38398	0.00583876	0.540809	0.47428	2.80867e-16	0.405935	0.36493	0.257541	-0.556767	0.0433387	2.80867e-16	0.413127	2.36892	0.00897229	2.36892	0.0206683	2.80867e-16	0.42522	2.01161	2.5642e-06	2.01161	7.14936e-06	1.1869	0.0273985	2.71265	4.56179e-06	1.52575	0.00884254	0.36493	0.381341	1.45485	6.12098e-05	1.08992	0.022376	-0.119102
hypotaurine	-2.48116	0.000337463	-2.95531	0.000412618	-2.18131	0.00232492	-0.693938	0.0442311	-1.71494	0.0058359	-2.98318	0.000717315	-3.91966	1.45899e-05	-3.61646	7.40557e-05	-4.61832	1.4464e-06	-2.13244	2.7659e-06	-2.37609	0.000100129	-5.42019	1.59967e-05	2.07297	0.00231295	4.43179	5.91012e-06	2.35883	0.000842356	1.59882	0.000650189	4.73165	2.44318e-06	3.13283	8.86019e-05	2.37617	0.000839476	3.73313	4.25973e-06	1.35697	0.00897986	1.35516	0.00308318	1.4439	0.0152603	0.0887311	0.867024	-2.53926
gamma-glutamylhistidine	0	NA	-0.039282	0.502092	-0.254482	0.731862	0	NA	0	NA	-2.61196	4.80477e-05	0	NA	-0.039282	0.386862	0.319543	0.53726	0	NA	0	NA	-2.03794	2.68714e-06	0.039282	0.413127	2.37059	0.000607569	2.33131	0.00190815	0	NA	2.11611	4.95658e-07	2.11611	1.12768e-06	0	NA	2.69013	6.08111e-06	2.69013	3.24919e-05	0	NA	0.0781703	0.437448	0.0781703	0.436077	-0.0979213
glycerophosphorylcholine (GPC)	0.52341	0.282073	-0.794375	0.0706809	0.148144	0.860372	0.153784	0.580113	0.194975	0.681649	-0.444866	0.356247	0.371117	0.112144	-1.61068	0.00024453	-1.94584	0.00333369	0.00149098	0.99708	-0.621326	0.191833	-2.53885	8.01967e-05	2.70282	0.000132637	5.02183	1.08391e-05	2.31902	0.00322586	1.38503	0.0161852	4.64657	8.42482e-07	3.26154	7.37955e-06	0.721022	0.00502051	2.70488	2.55035e-06	1.98386	0.000120887	0.762213	0.167822	2.10623	0.000724718	1.34402	0.0358659	-0.0409403
cystathionine	-0.990558	0.0251572	-0.974345	0.119508	-1.35162	0.00383957	-0.1112	0.492124	0.0960674	0.880857	0.282474	0.41521	-2.92671	1.43911e-06	-3.62809	1.16e-05	-3.68661	8.79886e-06	-2.04735	9.12971e-05	-2.55768	0.00276383	-2.05252	1.69065e-05	2.58576	0.000122362	4.84411	1.99737e-06	2.25836	0.000709116	2.60197	0.00369871	4.48305	4.76752e-07	1.88108	0.0035777	1.88437	0.000154232	4.08421	2.2619e-07	2.19984	0.000172516	2.09164	0.0035705	4.47788	2.30802e-07	2.38625	0.00262957	-1.10551
N-acetylhistidine	0.190151	0.466576	-0.417113	0.397081	0.126238	0.860372	0.201916	0.492124	0.411796	0.0531914	-0.031216	0.935457	1.07603	0.00022707	-0.647081	0.0340487	-0.849473	0.0433128	1.0878	0.000786463	0.181828	0.526202	-1.00693	0.00141593	2.39609	0.000141442	4.60176	4.61287e-06	2.20567	0.00204636	1.78883	0.0029788	4.53785	8.98932e-08	2.74902	5.26569e-05	0.672978	0.011136	2.67626	1.19331e-06	2.00328	2.65451e-05	0.882858	0.00231933	2.44313	7.96724e-06	1.56027	0.000400484	-0.0335745
adenine	-0.0284518	0.934969	-1.46894	0.00969538	0.0484627	0.903346	-0.641715	0.0452138	-1.24223	0.052305	-0.485332	0.0479769	-0.670872	0.0468339	0.8961	0.0500836	0.0972113	0.66037	-1.28414	0.000692756	1.12281	0.0285798	-0.436583	0.055917	3.31709	0.000162115	5.49386	1.67301e-06	2.17677	0.000842356	1.8766	0.000512437	5.57078	3.57316e-09	3.69418	1.0873e-06	4.88406	8.38983e-06	6.26194	9.696e-10	1.37788	0.00294774	4.28354	7.14971e-05	6.41833	1.92322e-07	2.13478	0.00264873	-0.482977
pyridoxamine	0.102156	0.712357	-0.901366	0.0188042	-0.00969828	0.978201	-0.483575	0.0869018	-1.05717	0.00109395	-0.651775	0.0112097	-0.348302	0.0964813	0.936737	0.000951183	-0.41081	0.113404	-0.934033	0.0044079	0.780932	0.0116366	-1.05289	0.000491611	1.6684	0.000231278	3.83437	2.52389e-06	2.16597	0.000557223	0.664876	0.0472305	3.72252	1.16205e-07	3.05764	3.4895e-06	2.95344	4.01109e-06	3.77186	2.50608e-08	0.818427	0.0012322	2.37984	7.14971e-05	3.60366	1.5242e-06	1.22382	0.00185249	-0.269636
cis-4-decenoate (10:1n6)*	-2.80867e-16	0.477247	-0.356254	0.441497	-0.0827358	0.918636	-2.80867e-16	0.492124	-0.101376	0.46946	-0.744105	0.155739	-2.80867e-16	0.383154	-0.446075	0.192285	-1.82634	0.0156544	-2.80867e-16	0.405935	-0.191196	0.202504	-2.48771	8.04289e-06	0.547451	0.123124	2.66851	0.000323223	2.12106	0.00996767	0.191196	0.238848	2.58578	2.41783e-06	2.39458	3.8762e-05	0.101376	0.409898	0.842172	0.0757122	0.740796	0.139005	-2.80867e-16	0.465792	0.0980668	0.437448	0.0980668	0.436077	-0.14633
N6,N6,N6-trimethyllysine	2.80867e-16	0.477247	2.80867e-16	0.502092	0.817112	0.331047	2.80867e-16	0.492124	2.80867e-16	0.46946	-0.211267	0.131831	2.80867e-16	0.383154	2.80867e-16	0.386862	-1.88768	0.0156751	2.80867e-16	0.405935	2.80867e-16	0.385685	-2.91606	1.48535e-06	2.80867e-16	0.413127	2.09895	0.00880196	2.09895	0.0204846	2.80867e-16	0.42522	2.91606	8.42482e-07	2.91606	2.21977e-06	2.80867e-16	0.409898	0.211267	0.100767	0.211267	0.119633	2.80867e-16	0.465792	2.80867e-16	0.437448	2.80867e-16	0.436077	0.272371
N-acetyl-isoputreanine	3.00332	2.78101e-05	2.90586	0.00372228	2.8079	0.00165196	2.80867e-16	0.492124	-0.283853	0.46946	-0.885384	0.129782	2.80867e-16	0.383154	-1.32689	0.0163138	-2.76726	0.00272399	-3.00332	8.14604e-06	-4.5166	2.82729e-05	-6.46054	1.53338e-08	1.61074	0.00159183	3.65264	3.89344e-05	2.0419	0.00996767	1.51328	0.0370466	3.45723	7.76532e-06	1.94395	0.00630613	0.283853	0.409898	0.885384	0.0988456	0.601531	0.377044	2.80867e-16	0.465792	2.80867e-16	0.437448	2.80867e-16	0.436077	2.90569
phosphocholine	0.998592	0.191692	0.269425	0.119857	0.0569231	0.90895	0.364557	0.130713	0.532519	0.236322	-0.461974	0.478629	-0.629362	0.144593	-1.57937	0.000299341	-0.392084	0.263906	-1.2634	0.0241415	-1.31628	0.00164913	-0.910981	0.0807389	1.47	0.0073807	3.46915	6.80976e-05	1.99916	0.000557223	0.74083	0.149073	2.52748	0.000419146	1.78665	5.01233e-05	0.519984	0.107253	3.70643	1.28362e-06	3.18645	7.81184e-05	0.687946	0.0848655	2.8799	0.000366364	2.19195	0.00633555	0.441647
gamma-glutamyl-alpha-lysine	1.40433e-16	0.477247	1.40433e-16	0.502092	-1.53444	0.0792846	1.40433e-16	0.492124	1.40433e-16	0.46946	1.40433e-16	0.478629	1.40433e-16	0.383154	1.40433e-16	0.386862	-1.99655	0.00704486	1.40433e-16	0.405935	1.40433e-16	0.385685	-0.462114	0.197424	1.40433e-16	0.413127	1.99655	0.0071613	1.99655	0.0166638	1.40433e-16	0.42522	0.462114	0.203337	0.462114	0.218171	1.40433e-16	0.409898	1.40433e-16	0.409325	1.40433e-16	0.435335	1.40433e-16	0.465792	1.40433e-16	0.437448	1.40433e-16	0.436077	-0.51148
N-acetylarginine	3.37274	0.000167346	6.23081	2.80089e-05	4.12046	2.36468e-05	-0.311384	0.43407	0.554858	0.052217	1.81298	0.00346799	3.91772	1.64367e-05	6.51216	8.47921e-06	3.45289	0.000229781	0.233596	0.405935	0.83621	0.00482295	1.14541	8.0394e-05	-3.34228	0.00122279	-1.36746	0.0268488	1.97481	0.0166638	-0.48421	0.0874566	-0.619743	0.00277633	-0.135533	0.581557	-0.747837	0.00912684	-1.83229	0.00138303	-1.08446	0.0420161	0.118405	0.709474	0.292067	0.389212	0.173662	0.350722	4.57467
betaine	0.594562	0.329503	-0.227246	0.740861	0.408614	0.643844	-0.157618	0.648976	-0.318567	0.553586	-0.840153	0.133231	0.55643	0.0228291	-0.617039	0.191696	0.39258	0.512137	-0.19575	0.698302	-0.70836	0.191487	-0.856186	0.113798	2.83326	0.000582161	4.03029	0.000147562	1.19704	0.15969	2.01145	0.0126623	3.84435	3.96072e-05	1.8329	0.00253021	1.65979	0.000546718	3.86644	1.28178e-07	2.20666	0.000118812	1.49884	0.021484	3.18391	0.00029625	1.68507	0.0297674	0.258643
taurine	0.51192	0.268249	-0.7118	0.0257088	0.00589214	0.995707	-0.150879	0.895898	-1.83225	0.0202796	-2.73223	0.000133697	-1.35633	0.0174483	-2.17351	0.00507923	-2.71981	0.000113632	-2.01913	0.00420388	-3.29397	1.33251e-06	-5.45793	3.24277e-06	2.01935	0.000141442	3.89656	7.28793e-06	1.87721	0.00165304	0.795631	0.0632982	3.39053	8.09587e-05	2.5949	0.000263778	1.20217	0.162606	2.53308	0.000625476	1.33091	0.0653137	-0.479205	0.381341	-0.0482692	0.941068	0.430936	0.218005	-0.0646627
N2,N2-dimethylguanosine	0.0611152	0.477247	0.0967515	0.8516	0.020158	0.954381	-2.80867e-16	0.492124	0.0886674	0.46946	0.156483	0.5061	-2.80867e-16	0.383154	-1.76935	0.000486933	-2.27511	1.11229e-05	-0.0611152	0.405935	-1.77743	4.03826e-05	-2.13879	2.14363e-06	1.76935	0.00122279	3.59192	1.25827e-07	1.82257	0.00180124	1.80498	0.000127253	3.55096	1.88411e-08	1.74598	4.54126e-05	-2.80867e-16	0.409898	1.3168	3.04405e-05	1.3168	0.000118263	0.0886674	0.465792	1.47329	6.29314e-06	1.38462	0.0002938	0.0593416
thiamin (Vitamin B1)	0.685173	0.435854	0.362149	0.613253	-0.0372086	0.967455	-0.487255	0.754829	0.216134	0.853553	-0.0950263	0.953016	1.97351	0.0318472	-0.784949	0.285871	-0.992886	0.259733	0.801079	0.405935	-0.930965	0.243777	-1.0507	0.207726	1.61282	0.0183548	3.41479	0.000572576	1.80197	0.0477903	1.2898	0.0936701	2.69241	0.00135891	1.40261	0.0126542	-1.14564	0.289593	0.448401	0.642	1.59404	0.116236	-0.442247	0.709474	0.84063	0.471318	1.28288	0.287518	0.336705
N-acetyl-cadaverine	-1.45128	0.0499614	-2.33663	0.0427634	-3.30584	0.00176779	-0.35238	0.775509	-1.42907	0.00160367	-1.47426	0.00127205	-1.09648	0.115098	1.67734	0.0543277	0.76728	0.000984584	0.00241639	0.99708	2.58489	7.78993e-05	2.59886	0.00223188	-0.535419	0.498922	0.948819	0.000480524	1.48424	0.123994	-1.42077	0.0583238	-0.905742	0.269452	0.515025	0.448239	2.2384	0.0121507	2.81258	0.00166814	0.574183	0.0162428	1.16171	0.138861	1.6907	0.026668	0.528994	0.218005	-2.36458
pseudouridine	-0.0664357	0.77904	-0.653555	0.024643	-0.0785112	0.802758	-0.245973	0.122395	-0.374628	0.0221897	-0.327614	0.036031	-0.242336	0.083355	-0.657172	0.00797098	-1.94462	1.18203e-05	-0.421874	0.0634491	-0.378245	0.00981673	-2.19372	6.27117e-07	1.08993	0.00150172	2.88611	2.0238e-06	1.79619	0.00067551	0.502807	0.0380506	2.87404	5.76793e-07	2.37123	2.37389e-08	0.67509	0.000564168	1.18383	6.08111e-06	0.508744	0.000313571	0.546435	0.00737582	1.10219	5.70756e-05	0.555758	0.0124111	-0.266167
lysine	4.71112	0.0218698	2.48	0.0246418	0.711845	0.271978	0.291025	0.000330823	0.261003	0.00128347	0.105877	0.0357821	4.89952	0.00883791	2.10893	0.0135885	0.591956	0.258556	0.479423	0.0289868	-0.110065	0.560377	-0.0140117	0.860016	2.74485	0.122	4.45329	0.0152654	1.70843	0.111992	0.513724	0.102368	0.454008	0.0392348	-0.0597154	0.811796	-0.045742	0.409898	0.145721	0.0145218	0.191463	0.00313298	-0.0757645	0.172637	-0.0394265	0.277951	0.036338	0.44162	2.63432
N-acetylputrescine	-5.83208	5.16e-07	-6.52287	0.000497683	-5.63367	3.88073e-06	-2.7942	0.000142913	-2.81225	0.000500587	-2.65132	8.79907e-05	-1.47504	0.000948603	0.392454	0.472191	0.513324	0.104425	1.56284	0.00154791	4.10307	0.000665811	3.49567	1.69065e-05	-0.177254	0.737677	0.928681	0.00261543	1.10594	0.0921251	-0.868038	0.282673	1.1271	0.0153197	1.99514	0.0308564	1.69024	0.00468065	2.91704	2.74779e-05	1.2268	0.0130397	1.67219	0.00701833	3.05992	2.14193e-05	1.38773	0.0121296	-5.9962
arginine	1.94193	0.00277494	7.74502	0.00085285	6.33869	0.00673477	-0.00826707	0.937356	0.205471	0.0202796	1.11518	0.00317581	2.45083	0.000224939	7.82844	0.000161439	5.76159	0.0039651	0.500631	5.52338e-05	0.288897	0.0285565	0.538074	0.000359677	-5.65713	0.00205859	-4.46934	0.0149456	1.18779	0.569142	0.145957	0.291401	-0.0725843	0.527042	-0.218541	0.174084	-0.279515	0.00599999	-1.15858	0.00141902	-0.879069	0.00997461	-0.065777	0.167822	-0.0351408	0.354374	0.0306362	0.436077	5.34188
N-methylproline	0.795619	0.44126	-0.232808	0.896161	0.0305989	0.984351	5.61733e-16	0.492124	-0.0490696	0.947282	-0.969947	0.415462	-0.1562	0.383154	-1.56611	0.122974	-1.82293	0.189348	-0.951819	0.241906	-1.38237	0.139273	-2.82347	0.000550124	1.70658	0.106144	3.31313	0.0121767	1.60655	0.331641	0.678157	0.548265	2.54811	0.00606623	1.86995	0.0571044	0.296675	0.409898	1.6464	0.0671171	1.34973	0.173215	0.247605	0.465792	0.676457	0.275665	0.428852	0.501904	0.197804
saccharopine	0.270447	0.338071	-0.990717	0.188395	-1.52799	0.0648138	-0.0758894	0.492124	0	NA	-2.1549	0.00179731	0.0758894	0.383154	-0.990717	0.100338	-0.160656	0.660586	-0.270447	0.24993	0	NA	-0.787569	0.269409	0.990717	0.122	2.74626	2.14238e-06	1.75554	0.0345639	-0.270447	0.249833	0.947824	0.163758	1.21827	0.0815932	-0.0758894	0.409898	2.50972	4.38966e-05	2.5856	0.000115399	0	NA	0.430702	0.257706	0.430702	0.26322	-0.74942
phosphoenolpyruvate (PEP)	2.80867e-16	0.477247	-0.374911	0.65662	0.542069	0.457752	2.80867e-16	0.492124	2.80867e-16	0.46946	-0.122451	0.562802	2.80867e-16	0.383154	-1.34801	0.0200467	-2.35093	0.00212886	2.80867e-16	0.405935	-0.973096	0.0394739	-3.01544	2.14363e-06	1.34801	0.0300495	2.70996	0.000656885	1.36195	0.118043	0.973096	0.0632982	3.25203	3.63358e-07	2.27893	0.00170253	2.80867e-16	0.409898	0.359035	0.0220256	0.359035	0.0288797	2.80867e-16	0.465792	0.236585	0.101153	0.236585	0.125531	0.0557193
UDP-N-acetylglucosamine/galactosamine	0.467738	0.33857	-0.682715	0.266825	-0.289898	0.711652	1.40433e-16	0.492124	1.40433e-16	0.46946	1.40433e-16	0.478629	-0.151622	0.302094	-1.61493	0.000364603	-2.74701	0.000251838	-0.61936	0.108027	-0.932212	0.0392794	-2.45711	1.38978e-05	1.4633	0.00211572	2.59539	0.000412457	1.13209	0.0831741	0.312852	0.556863	1.83776	0.00190208	1.5249	0.0134602	1.40433e-16	0.409898	1.40433e-16	0.409325	1.40433e-16	0.435335	1.40433e-16	0.465792	1.40433e-16	0.437448	1.40433e-16	0.436077	-0.168292
gamma-glutamylglutamine	2.80867e-16	0.477247	0.340516	0.65662	0.445217	0.583389	-0.027617	0.985097	-0.0862218	0.946422	-0.0962701	0.953016	0.5571	0.383154	2.77504	0.000921518	-1.14642	0.213125	0.529483	0.405935	2.3483	0.0113456	-1.68791	0.0487283	0.158825	0.13458	1.81422	0.00429804	1.6554	0.0179862	0.499341	0.42522	2.25944	0.000135728	1.7601	0.032175	2.37677	0.0297053	0.110701	0.909127	-2.26607	0.0420174	2.31816	0.0331977	0.0420482	0.971525	-2.27611	0.0317289	0.261911
N-acetylasparagine	1.5028	0.0636319	0.853843	0.0246418	0.739699	0.0180652	1.44858	0.00110003	1.46351	5.8836e-05	1.02184	0.00033478	1.31388	0.00369084	-0.614353	0.00162958	-1.20533	0.000385379	1.25965	0.0634491	-0.00469042	0.991213	-0.923189	0.000475541	1.77628	0.000648985	3.42714	8.11658e-06	1.65086	0.000557223	1.12732	0.109158	2.66404	0.0011889	1.53672	0.000861995	-0.15195	0.50423	0.907938	0.00351681	1.05989	0.00029269	-0.137021	0.584495	0.481201	0.0359638	0.618222	0.00834978	1.03211
N-acetylglutamine	1.78158	0.0253647	0.442356	0.42057	0.321347	0.231925	-0.364811	0.0867608	1.31843	0.00155356	1.20192	0.00407943	-0.377862	0.348374	-2.13574	0.000215358	-1.20229	0.00101576	-2.52425	0.000692756	-1.25967	0.00769516	-0.321713	0.243924	2.43523	0.00143728	4.05276	1.0403e-05	1.61753	0.00180124	1.096	0.0936701	2.59253	0.00048887	1.49653	0.0035777	0.677348	0.00879552	3.22833	8.70728e-07	2.55099	4.56983e-05	2.36059	7.14971e-05	4.79507	3.61854e-07	2.43448	0.000291792	0.848428
5'- GMP	-0.454754	0.563407	-0.160651	0.666019	-0.422384	0.252306	-2.80867e-16	0.492124	-2.80867e-16	0.46946	-1.79748	0.00465113	-1.52453	0.00514352	-2.19881	3.68419e-05	-1.00913	0.00579466	-1.06978	0.0858585	-2.03816	8.61568e-06	-2.38422	0.000497786	0.674284	0.185699	2.2739	0.000721048	1.59961	0.00165304	0.968387	0.133886	2.30627	0.00306579	1.33788	0.00219849	-2.80867e-16	0.409898	2.7893	1.7147e-06	2.7893	1.12249e-05	-2.80867e-16	0.465792	0.991817	0.0329024	0.991817	0.0389168	-0.34593
gulonate*	5.61733e-16	0.477247	5.61733e-16	0.502092	2.55281	0.260376	-0.368935	0.875204	-0.171257	0.964218	-0.269305	0.935457	0.917772	0.383154	4.32058	0.0156031	-1.84175	0.417537	0.548837	0.405935	4.14932	0.0178847	-4.66387	0.00379134	5.61733e-16	0.413127	3.65697	0.0617113	3.65697	0.103841	5.61733e-16	0.42522	6.20978	3.57316e-09	6.20978	1.12766e-08	3.4028	0.126734	0.897442	0.602536	-2.50536	0.260818	3.60048	0.0851224	0.997071	0.509242	-2.60341	0.25977	0.850936
beta-alanine	-5.61733e-16	0.477247	-4.14373	0.00804596	-0.705758	0.0358152	0.691774	0.492124	-3.33978	0.0233534	-3.3112	0.0178011	-5.61733e-16	0.383154	-1.98507	0.0954384	-1.34738	0.000143449	0.691774	0.405935	-1.18112	0.202504	-3.95282	0.00442374	5.32484	7.86791e-06	6.82009	1.17436e-09	1.49525	0.0050611	1.18112	0.238848	6.11433	1.48175e-08	4.93322	0.0009783	3.33978	0.0201268	5.47271	1.3981e-09	2.13293	0.0916565	-0.691774	0.465792	1.46974	0.359174	2.16151	0.100287	-1.6165
glycerophosphoethanolamine	0.327341	0.689954	-0.71837	0.102504	0.0274857	0.967455	0.355261	0.360356	-0.327625	0.553586	-0.864794	0.11515	-0.70939	0.0997448	-2.26535	0.000202759	-1.06644	0.0562005	-0.68147	0.296408	-1.8746	0.00328334	-1.95872	0.00120517	3.61536	0.000294548	5.11044	3.89344e-05	1.49507	0.0348784	2.56965	0.00522836	4.81058	1.70868e-05	2.24093	4.54126e-05	2.0594	5.1923e-05	4.75339	1.09728e-07	2.69398	0.000102672	1.37652	0.0382622	3.53333	0.000116273	2.15681	0.0100632	-0.121181
N-alpha-acetylornithine	2.80867e-16	0.477247	-0.376462	0.67318	0.273964	0.612529	0.528473	0.403602	-0.308793	0.46946	0.630809	0.47913	2.80867e-16	0.383154	-1.07615	0.0772704	-2.2587	0.00357781	0.528473	0.27092	-1.00848	0.0834012	-1.90186	0.0128786	1.38494	0.0170523	2.8706	4.82363e-05	1.48566	0.0464497	1.00848	0.111168	3.14456	1.33393e-07	2.13608	0.00625464	0.308793	0.409898	0.611894	0.200282	0.3031	0.618943	-0.528473	0.355162	0.71423	0.42671	1.2427	0.101862	-0.034166
4-hydroxyphenylacetate	-2.85548	3.75996e-07	-2.79984	0.00969538	-1.94935	0.00086557	0	NA	0	NA	0	NA	-2.85548	9.36417e-08	-4.64857	1.16e-05	-6.12058	8.62377e-07	0	NA	-1.84872	0.00964334	-4.17123	5.674e-10	1.79308	0.00261601	3.2651	1.0849e-05	1.47202	0.0248698	1.84872	0.0194339	4.17123	5.63197e-10	2.3225	0.00430842	0	NA	0	NA	0	NA	0	NA	0	NA	0	NA	-2.53489
N-acetylserine	0.732268	0.00729203	0.240103	0.266825	-0.113237	0.620553	0.529454	0.0455759	0.816673	0.000341398	1.04803	0.000750129	-0.390593	0.0825526	-1.03799	0.000315761	-1.55166	3.1735e-05	-0.593407	0.0088173	-0.461422	0.00468019	-0.390392	0.0443593	1.08872	0.00198448	2.55738	6.47127e-06	1.46866	0.000557223	0.59655	0.00286735	1.71187	2.83884e-07	1.11532	8.76749e-05	0.441316	0.018326	1.39631	1.21503e-05	0.954994	0.000366138	0.728535	0.00816533	1.91489	4.21064e-05	1.18635	0.000400484	0.286378
N-acetylglutamate	0.353597	0.591358	0.237346	0.389257	-0.189413	0.763742	0.4825	0.0860385	0.999664	0.017606	0.290177	0.28719	-0.12641	0.65486	-2.20334	6.22877e-05	-1.81346	0.00128328	0.00249234	0.99708	-1.44102	0.000617928	-1.33387	0.000497786	2.04991	0.000550742	3.50606	5.2143e-05	1.45615	0.00996767	1.93366	0.0106589	2.96305	0.000355703	1.02939	0.0035777	-0.0270166	0.906804	1.81902	1.91902e-05	1.84603	0.000290536	0.490147	0.172637	1.62669	0.000145852	1.13655	0.00573152	0.133843
N-acetylglucosamine/N-acetylgalactosamine	-1.59067	0.0636319	-1.18283	0.322674	0.187611	0.754648	-1.61637	0.0715411	-0.564754	0.014446	0.440953	0.145989	-0.811135	0.0318472	0.433452	0.248294	-1.07802	0.02816	-0.836837	0.405935	1.05153	0.243777	-0.824673	0.000127391	-0.014193	0.975864	1.35643	0.0160454	1.37062	0.0420774	0.393647	0.710723	3.13471	0.00048887	2.74106	0.0133394	1.23039	2.37771e-05	1.08955	0.0018479	-0.140845	0.601464	2.28201	0.0212588	3.14687	0.00159719	0.864861	0.00262957	-0.861962
guanine	0.194833	0.62908	-1.87929	0.0375716	-0.451947	0.183888	-0.688826	0.122395	-2.06902	0.00053523	-1.40854	8.91452e-05	-0.868336	0.0334637	-1.4733	0.00431605	-2.21653	1.30743e-05	-1.752	0.000643442	-1.66304	0.0205348	-3.17313	1.81856e-06	4.751	4.77277e-05	6.11896	4.65069e-07	1.36796	0.00996767	2.67688	0.00606722	5.47218	1.7865e-07	2.7953	0.00217504	4.14604	2.15014e-05	4.77076	3.05941e-07	0.624723	0.0492697	2.76584	0.00012397	4.05105	1.15115e-06	1.28521	0.00276847	-0.712133
gamma-glutamylthreonine	2.80867e-16	0.477247	2.80867e-16	0.502092	0.786036	0.197124	2.80867e-16	0.492124	2.80867e-16	0.46946	2.80867e-16	0.478629	2.80867e-16	0.383154	2.80867e-16	0.386862	-1.34686	0.0156751	2.80867e-16	0.405935	2.80867e-16	0.385685	-2.13289	8.04143e-07	2.80867e-16	0.413127	1.34686	0.0155144	1.34686	0.0339378	2.80867e-16	0.42522	2.13289	4.73923e-07	2.13289	1.0873e-06	2.80867e-16	0.409898	2.80867e-16	0.409325	2.80867e-16	0.435335	2.80867e-16	0.465792	2.80867e-16	0.437448	2.80867e-16	0.436077	0.262012
dodecadienoate (12:2)*	1.40433e-16	0.477247	-0.416984	0.433668	0.0952467	0.906821	1.40433e-16	0.492124	1.40433e-16	0.46946	-0.360703	0.293524	1.40433e-16	0.383154	-1.33441	0.00187539	-1.99356	0.00387501	1.40433e-16	0.405935	-0.917428	0.00702397	-2.44951	6.27117e-07	1.33441	0.00324148	2.35739	0.000494975	1.02298	0.111992	0.917428	0.0157688	2.45264	3.4053e-07	1.53521	0.00141028	1.40433e-16	0.409898	0.363829	0.222195	0.363829	0.254459	1.40433e-16	0.465792	0.00312649	0.437448	0.00312649	0.436077	-0.107246
2S,3R-dihydroxybutyrate	-0.19596	0.886763	-1.15236	0.502092	0.112438	0.908147	5.61733e-16	0.492124	1.38567	0.193709	2.68588	0.0166364	-3.26202	0.0032284	-2.34179	0.0288555	-2.22492	0.0355476	-3.06606	0.00105827	0.196229	0.880805	0.34852	0.399553	-0.750727	0.537491	0.457159	0.639264	1.20789	0.331917	-1.70712	0.211752	0.765556	0.244468	2.47268	0.044333	0.169503	0.409898	1.49426	0.0755431	1.32476	0.137177	1.55517	0.14662	4.18014	7.57997e-06	2.62497	0.0269419	-0.41196
nicotinamide riboside	-8.426e-16	0.477247	-1.4333	0.154969	-0.717928	0.180461	-8.426e-16	0.492124	-0.86211	0.422289	-2.93969	2.646e-05	-8.426e-16	0.383154	-1.48631	0.100338	-0.607351	0.105521	-8.426e-16	0.405935	-0.915123	0.228524	-2.82911	4.10538e-05	2.56401	0.000355324	3.89831	7.71272e-06	1.3343	0.0420774	1.13072	0.164921	3.18039	1.12583e-06	2.04967	0.0249598	1.0777	0.253115	3.29096	3.50373e-10	2.21326	0.0252451	0.215594	0.380302	0.351276	0.270276	0.135682	0.694177	-0.717075
2-methylcitrate/homocitrate	1.58194	0.00278193	2.10542	0.00969538	0.899658	0.0129704	1.61987	1.11709e-05	1.98343	3.43604e-05	1.26145	0.00164083	-1.37393	3.68855e-05	-1.9004	0.000429129	-2.31418	0.000100447	-1.33601	0.00237469	-2.02239	0.00149374	-1.95239	3.95131e-06	0.764812	0.0448425	2.06109	3.39123e-05	1.29628	0.0123048	1.28829	0.0494513	1.37881	0.00221519	0.0905184	0.860435	0.238345	0.277123	1.12085	0.00198126	0.882505	0.0153993	0.601909	0.00970135	0.762434	0.000307377	0.160525	0.39971	1.52901
cysteine s-sulfate	-0.176304	0.721796	-0.340177	0.257595	-0.389001	0.087022	-0.0990942	0.964966	-0.0751282	0.925926	-0.572811	0.346406	0.726083	0.383154	0.644831	0.10994	-0.442896	0.168515	0.803293	0.308784	0.90988	0.0473564	-0.626706	0.167716	1.84385	0.00115681	3.07731	8.54116e-06	1.23346	0.00067551	1.67997	0.0034929	2.86461	1.94866e-05	1.18464	0.00149608	1.76259	0.0740669	1.90833	0.031634	0.145737	0.760456	1.78656	0.0740184	1.43461	0.101153	-0.351945	0.541235	-0.301827
tyrosol	-2.17291	0.00105912	-2.07604	0.00102864	-2.38585	1.79319e-05	-0.0506781	0.789823	-1.76757	1.17321e-05	-1.59133	0.000261203	-1.84576	0.00110659	-0.10143	0.642042	-0.903234	0.00672312	0.276471	0.0174472	0.207036	0.394966	-0.108712	0.522897	0.107298	0.79885	1.31494	0.00860018	1.20764	0.00424589	0.204166	0.42522	1.102	2.0112e-05	0.897832	0.0104239	1.85162	1.46423e-05	2.25746	7.62591e-06	0.40584	0.11431	0.134731	0.456853	0.716814	0.00107441	0.582083	0.0102803	-2.2116
N1-methylinosine	1.40433e-16	0.477247	-0.432258	0.360538	-0.243413	0.543359	1.40433e-16	0.492124	1.40433e-16	0.46946	-0.398707	0.145989	1.40433e-16	0.383154	-0.523064	0.132953	-1.28577	0.00649956	1.40433e-16	0.405935	-0.0908055	0.385685	-1.44107	1.38376e-06	0.523064	0.159823	1.72953	0.000276875	1.20647	0.0420774	0.0908055	0.42522	1.48612	2.152e-07	1.39531	2.22359e-05	1.40433e-16	0.409898	0.443758	0.0757122	0.443758	0.0916565	1.40433e-16	0.465792	0.0450503	0.437448	0.0450503	0.436077	-0.225224
N-acetyltyrosine	-0.42345	0.351715	-0.388854	0.460722	-0.627275	0.0445582	1.40433e-16	0.492124	-0.342667	0.0293034	-0.0144398	0.966038	-0.68153	0.0332572	-2.13274	0.00060009	-2.85032	2.79028e-06	-0.25808	0.234946	-2.08655	3.3136e-06	-2.23749	7.04401e-06	2.49968	0.00150172	3.62757	7.71272e-06	1.12789	0.0452532	2.53427	8.98146e-05	3.42375	9.16735e-07	0.889473	0.00196016	1.04847	1.46423e-05	1.45878	2.16048e-06	0.410309	0.0231573	0.705801	0.000185087	1.44434	1.88693e-05	0.738537	0.00532584	-0.47986
gamma-glutamyl-epsilon-lysine	0	NA	0	NA	-0.983196	0.0506537	0	NA	0	NA	0	NA	0	NA	0	NA	-0.98404	0.0239485	0	NA	0	NA	-0.000843411	0.415912	0	NA	0.98404	0.022867	0.98404	0.0466366	0	NA	0.000843411	0.436089	0.000843411	0.448239	0	NA	0	NA	0	NA	0	NA	0	NA	0	NA	-0.327732
gamma-glutamylglutamate	0	NA	-0.161003	0.231254	-0.805468	0.0837254	0	NA	0	NA	-2.64509	0.000658996	0	NA	-0.161003	0.133394	1.50773	0.0192929	0	NA	0	NA	-0.331898	0.0807389	0.161003	0.159823	1.13737	0.00527699	0.976362	0.032219	0	NA	0.331898	0.0859302	0.331898	0.0995202	0	NA	2.64509	0.000292887	2.64509	0.000535895	0	NA	0	NA	0	NA	-0.322157
3-(4-hydroxyphenyl)lactate (HPLA)	-1.00608	0.0370701	-0.80315	0.0246953	-1.38484	3.67561e-05	0.794622	0.00124013	-0.123286	0.326794	-0.0489827	0.860824	-3.06959	3.63225e-05	-2.65468	1.2086e-05	-2.71412	3.9738e-06	-1.2689	8.6413e-06	-1.97481	4.14222e-06	-1.37826	2.6843e-06	0.934912	0.0482907	1.8691	0.000616223	0.934188	0.00907987	1.13784	0.000379295	1.49034	4.05262e-06	0.352503	0.0381518	1.34983	5.1923e-05	2.22458	1.03351e-05	0.874749	0.00236342	0.431922	0.00676375	1.38097	1.15115e-06	0.949052	0.000291792	-1.06469
2'-O-methyladenosine	-0.333125	0.212988	-0.614967	0.0808631	-0.63744	0.00837702	-0.136608	0.492124	-0.351105	0.163526	-0.43952	0.0283878	-0.497282	0.0239106	0.147812	0.591114	0.131237	0.362396	-0.300765	0.14265	0.411674	0.0245116	0.329157	0.0768081	0.277854	0.371429	1.19948	0.000217485	0.921627	0.0138059	-0.00398748	0.981031	0.895166	0.000526349	0.899153	0.0009783	0.922948	0.00219948	1.828	1.07447e-06	0.905051	0.00208547	0.708451	0.00737582	1.52509	5.14226e-05	0.816636	0.00262957	-0.528511
2'-deoxyuridine	-0.00418274	0.97466	-0.528338	0.266825	-0.294994	0.0122887	-0.44428	0.011015	-0.333521	0.103798	-0.469616	0.0217877	-1.00715	0.000253028	-0.900643	0.000483016	-0.983876	0.000194077	-1.44725	8.8496e-07	-0.705826	0.0832006	-1.1585	3.35656e-06	0.6098	0.0073807	1.50251	6.47127e-06	0.892711	0.000841801	0.0856446	0.823371	1.2117	1.09854e-06	1.12606	0.0143414	0.716311	0.00316382	1.52579	2.2996e-05	0.809478	0.00161568	0.82707	0.000795234	1.50045	7.36739e-07	0.673383	0.00532584	-0.275838
alanine	1.65383	0.256328	0.484653	0.307856	0.140532	0.747304	-0.808329	0.0162864	0.196633	0.47682	0.363575	0.478629	2.7729	0.00566545	0.118686	0.566309	0.579661	0.0517945	0.310742	0.718072	-0.169333	0.641862	0.802704	0.0807389	1.89637	0.0418994	2.76401	0.00610217	0.867641	0.0294422	0.727198	0.42522	1.25072	0.143157	0.523521	0.1808	-0.75784	0.00327188	0.570776	0.00596176	1.32862	0.000279386	0.247122	0.465792	1.74268	0.00547592	1.49556	0.0162287	0.75967
N-acetylmethionine sulfoxide	0.785447	0.0636319	0.280699	0.338244	0.0728686	0.894936	0.101128	0.94337	-0.104478	0.750755	-0.0539767	0.935457	0.7814	0.144593	-0.135884	0.589022	-1.237	0.00326666	0.0970803	0.88299	-0.521061	0.0397334	-1.36384	0.00351474	1.39728	0.00303822	2.25203	6.83427e-05	0.854756	0.00116043	0.892531	0.0107368	1.53946	0.00088715	0.646925	0.0927049	0.479995	0.387939	0.233639	0.640193	-0.246356	0.536984	0.274389	0.652772	0.0785343	0.906427	-0.195855	0.47932	0.379672
2'-O-methyluridine	-0.614	0.282073	-1.00528	0.066079	-0.399285	0.0170001	0.0475436	0.943001	-0.41302	0.0551169	-0.354439	0.0439326	-1.5161	0.000467647	-0.269243	0.308144	-0.185486	0.233384	-0.854556	0.0984453	0.32302	0.366891	-0.140641	0.205092	0.320995	0.289265	1.14236	0.000174004	0.821368	0.0181709	-0.0702892	0.902918	1.35708	0.00757323	1.42737	0.0035777	1.56785	0.000524416	2.47298	9.86067e-06	0.905125	0.00143349	1.10729	0.00396999	2.07099	1.72772e-05	0.963706	0.000400484	-0.672856
N-acetylalanine	0.435504	0.0218698	0.00657861	0.968364	0.0751611	0.763742	0.418867	0.0140486	0.352024	0.0953243	0.293914	0.0243287	-1.66543	3.83867e-06	-2.05303	2.22473e-05	-1.34349	8.79886e-06	-1.68207	2.36796e-06	-1.70758	8.61568e-06	-1.12473	3.89709e-05	1.11337	0.00126137	1.29601	3.89344e-05	0.182648	0.415854	0.684441	0.000379295	0.935672	0.000110445	0.251231	0.0956514	0.725769	0.00120802	1.61796	4.86038e-07	0.892186	0.000290536	0.658926	0.00676375	1.493	4.42399e-06	0.834077	0.00162834	0.172415
N-acetylaspartate (NAA)	0.750033	0.023276	0.72324	0.188716	0.799936	0.0690318	0.299759	0.132646	0.737119	0.0109928	0.277658	0.0243287	-1.15669	0.000948603	-2.36526	0.000318636	-1.83764	0.000336361	-1.60697	1.79335e-05	-2.35138	6.33478e-05	-2.35992	1.67983e-06	1.52837	0.00593995	2.16998	0.000234322	0.641615	0.231087	1.50158	0.00388944	2.21989	8.8614e-06	0.718311	0.0524792	0.319803	0.233663	1.48904	1.43967e-05	1.16924	0.000672071	0.757163	0.000795234	1.46694	5.60416e-07	0.709775	0.00037026	0.757736
aspartate	1.60327	0.477247	0.948346	0.157504	0.187826	0.856912	0.406578	0.1316	1.22748	0.0865029	1.21269	0.00982728	3.21788	0.0320346	-1.25827	0.067682	-0.856929	0.178352	2.02119	0.106699	-0.979132	0.0395408	0.167938	0.441393	3.40877	0.0352948	3.24132	0.0336422	-0.167442	0.823454	2.75384	0.0589965	1.82588	0.123813	-0.927962	0.0726963	-1.06738	0.125599	-0.833486	0.0468459	0.233896	0.729041	-0.246479	0.313542	-0.0273708	0.88131	0.219108	0.25977	0.913148
asparagine	2.53963	0.0636319	2.19527	0.026959	1.58629	0.0946012	1.56589	1.49458e-05	2.04762	0.00130285	2.79805	0.00143556	2.70503	0.0129713	0.203423	0.745472	1.33341	0.138894	1.7313	0.0205661	0.0557728	0.888032	2.54518	8.01967e-05	1.76652	0.116836	-0.194443	0.866237	-1.96096	0.0717541	1.42216	0.0968525	-1.14779	0.123985	-2.56995	0.00191381	-0.735091	0.125822	-1.56607	0.0183797	-0.830974	0.260818	-0.253365	0.0359615	-0.333902	0.00314832	-0.0805371	0.404113	2.10706
S-1-pyrroline-5-carboxylate	-0.621954	0.065177	-0.912752	0.0642082	-0.9167	0.0170001	0.149677	0.775509	-0.206648	0.721374	-1.56692	0.0105709	-1.89445	0.000571906	-1.49499	0.00799812	0.446789	0.105576	-1.12282	0.00325515	-0.788884	0.0628211	-0.203427	0.665422	0.388221	0.257588	0.700442	0.0354941	0.312221	0.429374	0.0974233	0.762478	0.405696	0.0930993	0.308273	0.355466	0.787679	0.160269	3.04168	9.86067e-06	2.254	0.000672071	0.431354	0.378814	1.32508	0.0262531	0.89373	0.1634	-0.817135
alpha-ketoglutaramate*	0.326875	0.221423	-0.406696	0.378121	-0.420955	0.540041	0.0533965	0.457407	-0.321984	0.384649	-0.205353	0.526013	-1.8104	1.97946e-06	-2.63174	4.20435e-05	-2.17028	0.000790489	-2.08388	2.7659e-06	-2.54703	0.00012182	-1.95468	0.000609922	1.49554	0.00194892	1.89419	0.00093085	0.398642	0.445033	0.761972	0.0366283	1.14636	0.01053	0.384383	0.392736	0.674211	0.000546718	1.53431	8.13418e-05	0.860099	0.00785052	0.29883	0.417283	1.27556	0.000166445	0.97673	0.022376	-0.166925
pyroglutamine*	0.738655	0.556832	0.443726	0.433668	1.15764	0.117222	0.260078	0.923317	0.290041	0.675375	0.00686699	0.992123	0.683647	0.542709	0.0120797	0.9889	0.399801	0.474231	0.20507	0.88299	-0.141605	0.688507	-0.750971	0.180176	1.94574	0.0501991	2.47142	0.0190637	0.52568	0.445033	1.65081	0.0862846	2.8904	0.00573869	1.23959	0.0180736	1.27417	0.289593	2.18757	0.0390714	0.913401	0.146013	1.30413	0.237578	1.93436	0.0661013	0.630227	0.292235	0.780007
glutamate	1.54054	0.477247	0.764217	0.246219	0.101573	0.929315	0.849919	0.00353655	1.13375	0.0234978	0.386594	0.126404	2.31179	0.0958186	-1.63215	0.0048052	0.468878	0.475249	1.62117	0.186358	-1.26262	0.0196612	0.753899	0.0156536	3.60483	0.0274478	2.59106	0.0831082	-1.01377	0.211404	2.82851	0.0565017	1.15209	0.32353	-1.67641	0.0118308	-0.339111	0.409898	0.748144	0.0152681	1.08725	0.0288797	-0.0552821	0.790176	0.284819	0.0533868	0.340101	0.0605018	0.80211
glutamine	2.09732	0.212988	0.78079	0.14352	0.644951	0.266246	0.0841493	0.937356	0.582659	0.107276	0.087285	0.945852	0.0393821	0.975238	-1.54111	0.00374502	1.40922	0.00811027	-1.97379	0.0564204	-1.73924	0.000589801	0.851559	0.29129	1.50772	0.185948	1.50052	0.169542	-0.00719268	0.990798	0.191186	0.823371	0.0481533	0.963275	-0.143032	0.709549	-0.0727796	0.822109	2.87037	6.41192e-05	2.94315	1.98532e-05	0.42573	0.465792	2.8735	0.00653408	2.44777	0.0180611	1.17435
cysteine-glutathione disulfide	0.152984	0.477247	0.0138427	0.961005	0.0258944	0.945972	-0.0184304	0.946599	-0.0975835	0.593902	-0.150598	0.283822	-0.199684	0.219377	-0.934479	0.000230503	-0.462889	0.0421456	-0.371099	0.0255537	-1.04591	0.00339692	-0.639381	0.000263026	0.598555	0.00639062	0.597412	0.0191802	-0.00114249	0.995138	0.459413	0.123792	0.470322	0.00610444	0.0109092	0.971047	-0.13624	0.409283	0.334208	0.0267561	0.470448	0.00435639	-0.215393	0.239718	0.20204	0.105599	0.417433	0.0337303	0.0642405
5-oxoproline	0.224656	0.73337	0.592475	0.244631	0.825908	0.257969	0.0521861	0.972766	0.0305878	0.976407	0.0953204	0.887444	0.432715	0.448749	0.604302	0.282641	0.285723	0.587254	0.260245	0.658424	0.0424148	0.925238	-0.444865	0.415912	0.743087	0.208978	1.44759	0.0354941	0.704508	0.331917	1.11091	0.0299524	2.04885	0.00230408	0.937941	0.0232941	0.914674	0.208827	1.3006	0.025771	0.385928	0.435335	0.893076	0.259979	1.34374	0.0550014	0.450661	0.480955	0.54768
O-acetylhomoserine	-1.19763	0.0195308	-1.54281	0.0632301	-0.67713	0.21404	-1.85221	0.000103946	-1.88644	1.53633e-06	-1.44972	2.46295e-05	-1.56082	0.00327986	-1.7057	0.00850033	-1.0978	0.0185704	-2.21541	2.7659e-06	-2.04934	0.000301885	-1.87039	3.54e-05	0.463497	0.45308	-0.193529	0.71909	-0.657026	0.379941	0.118315	0.739668	0.326966	0.202627	0.208651	0.605459	0.318621	0.202911	0.269499	0.222195	-0.049122	0.579032	0.284391	0.103487	0.671993	0.00166195	0.387603	0.0460426	-1.13919
glycine	0.439764	0.108617	0.242871	0.433668	0.755394	0.0649664	-0.0136651	0.875204	0.0729089	0.236322	0.151928	0.0765367	0.545536	0.0166176	-0.305604	0.0722739	0.417593	0.189348	0.0921069	0.41767	-0.475567	0.0217676	-0.185873	0.0684368	0.73199	0.0187709	0.0705178	0.855252	-0.661472	0.111992	0.535097	0.0447751	0.386148	0.0188261	-0.148949	0.471431	-0.119151	0.0275141	-0.057425	0.421255	0.0617259	0.435335	-0.0325769	0.604987	0.108168	0.0550014	0.140745	0.0297674	0.479343
N-acetylglycine	0.708078	0.0218698	0.303391	0.0427634	0.531598	0.0129704	-0.0136011	0.985097	0.361369	0.46946	0.354599	0.37392	-0.995057	0.00256664	-1.62243	0.00243274	-1.06999	0.000311572	-1.71674	0.00223744	-1.56445	0.000100129	-1.24698	0.00257387	0.151904	0.363989	0.30028	0.0750402	0.148377	0.341154	-0.252784	0.232684	0.1238	0.568823	0.376584	0.0158108	-0.475467	0.335313	0.225352	0.385805	0.700819	0.121523	-0.100496	0.823515	0.593552	0.267618	0.694048	0.109743	0.514355
serine	2.72388	0.0424806	1.47269	0.0384554	1.96341	0.0206725	1.6072	3.33159e-06	2.0765	0.0005242	2.26895	0.000110551	1.62701	0.113821	-1.12942	0.0553476	0.428003	0.511078	0.510331	0.130668	-0.525612	0.0628332	0.733545	0.00142551	2.16331	0.0718593	0.391021	0.735778	-1.77229	0.0595516	0.912124	0.0632982	-0.369447	0.29547	-1.28157	0.0035777	-0.593119	0.153844	-0.807988	0.022011	-0.214869	0.633875	-0.123819	0.013629	-0.146232	0.00819145	-0.0224135	0.670383	2.05332
4-imidazoleacetate	0.0354591	0.762134	0.143325	0.863557	-0.472129	0.00186854	-0.623743	0.05135	-1.29386	0.00197122	-1.60719	3.4093e-05	-1.87955	3.83867e-06	-0.998695	0.016463	-0.997933	5.04448e-05	-2.53875	4.0215e-06	-2.43588	0.00153815	-2.13299	7.01002e-07	0.546246	0.0829207	1.32302	4.57702e-06	0.776778	0.0339378	0.654112	0.257246	0.815435	4.06897e-06	0.161323	0.788257	1.4271	0.00134898	2.20464	1.44518e-06	0.77754	0.0163674	0.756984	0.0223906	1.2212	0.000756415	0.464212	0.0306925	-0.0977818
4-guanidinobutanoate	0.0297161	0.961073	0.109435	0.73341	0.0274013	0.967455	-0.0626651	0.961421	-0.118804	0.861438	-0.115262	0.885122	0.144752	0.799087	0.215992	0.580913	0.0065422	0.992435	0.0523712	0.94955	-0.0122472	0.983551	-0.136121	0.770064	0.752556	0.110608	0.339518	0.540045	-0.413038	0.349883	0.832275	0.106015	0.337203	0.505468	-0.495071	0.208128	0.823795	0.221537	0.201308	0.726456	-0.622487	0.320833	0.767656	0.267743	0.148711	0.835135	-0.618946	0.298503	0.0555175
1-methyl-5-imidazoleacetate	-2.08699	0.0597094	-3.00963	0.0223803	-2.39769	0.0148673	0.381931	0.43407	-0.805476	0.29012	-0.100999	0.86745	-2.08699	0.032029	-2.49062	0.0265178	-3.36359	4.85751e-05	0.381931	0.29364	-0.286474	0.385685	-1.0669	0.148823	1.20911	0.328329	1.57435	0.0827965	0.365238	0.688578	0.286474	0.42522	1.26365	0.0802444	0.977175	0.229194	0.805476	0.253115	0.29775	0.409325	-0.507726	0.494546	-0.381931	0.380302	-0.185179	0.697413	0.196751	0.436077	-2.4981
imidazole propionate	-1.00047	0.0636319	-0.886051	0.162619	-0.960092	0.0118726	1.40433e-16	0.492124	-0.271963	0.30838	0.0186584	0.939529	-1.84149	0.000716997	-1.25472	0.00632842	-1.66431	5.23525e-06	-0.841027	0.00449701	-0.640631	0.129092	-0.685561	0.0217896	-0.314813	0.490615	-0.0899573	0.828368	0.224855	0.537069	-0.200396	0.668408	-0.0495819	0.899177	0.150814	0.775925	0.271963	0.272457	0.0872258	0.210413	-0.184737	0.435335	1.40433e-16	0.465792	0.105884	0.437448	0.105884	0.436077	-0.94887
imidazole lactate	-0.33166	0.0499614	-0.414764	0.378121	-0.632163	0.0114901	-0.59447	0.05135	-1.21514	0.000118878	-1.18624	4.80477e-05	-1.52652	1.12024e-05	-1.01061	0.000999241	-0.259858	0.179671	-1.78933	5.11351e-05	-1.81099	0.00066462	-0.81394	1.89082e-05	0.957438	0.00115681	1.16508	0.000127665	0.207642	0.43042	0.874334	0.0494513	0.864578	8.33231e-05	-0.0097565	0.97922	1.47334	0.000154232	2.43174	8.70728e-07	0.958393	0.000502519	0.852671	0.00626681	1.83996	2.4126e-05	0.987293	0.000291792	-0.459529
3-methyl-2-oxovalerate	-6.44481	0.000148409	-3.96299	1.69696e-05	-4.78612	3.51255e-07	-5.67351	7.3774e-07	-5.7091	4.76516e-07	-4.55661	3.3959e-07	-2.56359	1.01701e-06	-1.9796	6.20379e-05	-2.2243	1.4464e-06	-1.79229	0.0634491	-3.7257	7.9051e-06	-1.99479	4.20593e-05	0.0661196	0.77916	0.207139	0.038775	0.141019	0.569142	2.54794	0.0205255	1.86583	0.0392348	-0.682108	0.0230769	0.650105	0.00968076	0.546427	0.0175964	-0.103678	0.559637	0.614522	0.190974	1.66333	0.000537743	1.04881	0.0129485	-5.06464
4-methyl-2-oxopentanoate	-5.77118	1.4334e-05	-3.75965	1.73338e-05	-3.96475	3.51255e-07	-5.14698	9.5807e-06	-5.22292	8.88719e-06	-4.27183	3.36412e-06	-2.64314	5.29621e-07	-1.99842	0.000126599	-2.17072	1.4464e-06	-2.01894	0.0106592	-3.46169	7.26672e-05	-2.4778	3.1676e-05	0.078017	0.764697	0.0999166	0.346727	0.0218996	0.942839	2.08955	0.00606722	1.90634	0.00306725	-0.183205	0.361319	0.72274	0.00519994	0.572333	0.00618484	-0.150407	0.422694	0.646794	0.404178	1.44748	0.0165927	0.800689	0.177885	-4.49853
3-methyl-2-oxobutyrate	-4.52306	0.000111898	-2.65687	0.00102864	-3.9219	1.05458e-05	-2.64645	1.11709e-05	-3.33979	3.35601e-06	-2.75598	3.36412e-06	-3.67204	5.47615e-07	-2.8224	4.99288e-05	-3.24661	8.69649e-07	-1.79543	0.00958155	-3.50532	2.04731e-05	-2.08069	0.000122373	-0.00666175	0.979918	0.246894	0.0304998	0.253556	0.459279	1.85952	0.0205255	0.848052	0.179799	-1.01147	0.0370766	0.842974	0.00620906	0.672324	0.0171434	-0.17065	0.435335	0.149638	0.604987	0.562796	0.00803248	0.413159	0.131548	-3.70061
beta-hydroxyisovalerate	-0.0639951	0.786173	-0.119655	0.635062	-0.239357	0.452977	-0.0129566	0.972766	0.0495258	0.841393	0.272187	0.232601	-0.270276	0.192094	-0.513229	0.0464565	-0.695664	0.00623719	-0.219238	0.24993	-0.344048	0.0340984	-0.18412	0.442402	0.0933612	0.703897	0.172639	0.412538	0.0792776	0.748597	0.0377014	0.805196	-0.00272295	0.988962	-0.0404243	0.87725	-0.149591	0.437596	-0.252749	0.190148	-0.103157	0.647433	-0.0871091	0.656005	0.0323945	0.886712	0.119504	0.491882	-0.141002
methylsuccinate	0.306182	0.477247	1.04879	0.229431	0.09976	0.89143	0.987401	0.397694	0.244268	0.59633	0.944351	0.0316147	0.484672	0.383154	0.00072843	0.997764	-0.151411	0.47428	1.16589	0.109	-0.803796	0.287226	0.69318	0.167716	0.259616	0.234413	0.231877	0.228812	-0.0277389	0.936992	1.00223	0.238848	0.0254549	0.963275	-0.976771	0.22316	-0.224328	0.734226	-0.404206	0.495221	-0.179878	0.494546	-0.96746	0.220106	-0.447256	0.50183	0.520205	0.353505	0.484911
isovalerate (C5)	-2.95956	7.32162e-05	-2.45177	0.00301083	-1.54056	2.18887e-05	-1.82802	0.00289411	-2.97561	0.000113806	-2.98887	2.46295e-05	-3.67264	3.43223e-08	-3.39682	1.2086e-05	-3.38014	1.13986e-06	-2.5411	0.000897075	-3.92065	0.000100129	-4.82845	2.59363e-07	1.20951	0.00269328	1.84073	2.94103e-06	0.631225	0.0723844	1.71729	0.0157688	3.25973	7.76532e-06	1.54244	0.00491683	1.48533	5.1923e-05	2.13323	2.69496e-06	0.647903	0.0120852	0.337741	0.584495	0.972379	0.0598269	0.634638	0.208996	-2.3173
2,3-dihydroxy-2-methylbutyrate	-1.1433	0.44031	-1.90257	0.118127	-1.70077	0.179692	-0.565916	0.213127	-0.164004	0.753196	-0.49497	0.299204	-1.07267	0.284085	-3.17198	0.000168269	-1.84718	0.0491059	-0.495285	0.405935	-1.43342	0.139833	-0.641378	0.337239	1.93994	0.0718593	0.840908	0.475341	-1.09903	0.26865	1.18066	0.317136	0.283436	0.772842	-0.897228	0.448239	-0.159379	0.737098	0.066398	0.890248	0.225777	0.647433	0.242534	0.465792	0.137344	0.437448	-0.10519	0.762622	-1.58221
alpha-hydroxyisocaproate	-1.83576	3.84589e-05	-1.48793	0.0668202	-1.29773	0.00232492	-1.0732	0.00090118	-1.83405	5.8836e-05	-1.37969	2.46295e-05	-2.51082	6.0474e-06	-2.25131	0.000202759	-2.0172	2.7617e-06	-1.74825	2.79592e-06	-2.59744	0.0012325	-2.09916	2.0713e-05	0.501349	0.119028	0.435042	0.0272172	-0.066307	0.853883	0.849186	0.184176	0.97307	0.0036892	0.123885	0.85605	0.760858	0.0297053	0.928658	0.0013635	0.1678	0.469438	0	NA	0.622162	0.00023627	0.622162	0.000829199	-1.54047
2-hydroxy-3-methylvalerate	-1.13253	0.00130564	-1.20248	0.0365563	-1.05273	0.00232492	-0.878116	0.000518354	-1.33123	0.00105279	-0.734857	0.000590166	-3.07372	5.65757e-07	-3.10746	4.20435e-05	-2.65123	2.80283e-06	-2.81931	1.45103e-06	-3.23621	2.46997e-05	-2.33336	4.67793e-07	0.790428	0.0473771	0.55123	0.020369	-0.239198	0.567106	0.720474	0.0600839	0.63103	0.0101337	-0.089444	0.775925	0.756689	0.00574385	0.973727	0.000328833	0.217037	0.222648	0.30358	0.242816	1.11699	1.39908e-06	0.813405	0.00900119	-1.12925
alpha-hydroxyisovalerate	0.144453	0.402475	-0.28191	0.594062	-0.0650626	0.886028	-0.0683787	0.858236	0.288873	0.344866	0.851324	0.00407943	-2.3807	1.51852e-06	-1.87171	0.00038556	-2.15931	1.49503e-06	-2.59353	2.53232e-06	-1.30092	0.00482295	-1.24292	0.00120517	0.288006	0.339933	0.556995	0.00487892	0.268988	0.446172	-0.138356	0.672544	0.347479	0.13549	0.485835	0.211951	0.797001	0.0098414	0.778387	0.000944409	-0.0186136	0.916064	1.15425	0.00349858	1.69809	0.000164821	0.543838	0.0964744	-0.0675065
N-acetylisoleucine	-0.532799	0.00293299	-0.741437	0.0529231	-0.415305	0.21385	-0.872341	0.000614732	-0.676864	0.0154638	-0.600235	0.00568275	-0.691586	0.00177201	-1.11039	0.00230316	-0.411272	0.0797044	-1.03113	8.66401e-06	-1.04581	0.00134028	-0.596201	0.0182041	1.21955	0.00303822	1.22576	0.000556383	0.00621126	0.989399	1.01091	0.00029893	1.34326	5.46048e-05	0.332343	0.147409	0.80075	0.000602426	1.50608	4.90996e-06	0.705327	0.000290536	0.996227	0.00387389	1.77818	6.91622e-06	0.781956	0.0138964	-0.56318
N-acetylleucine	-0.663302	0.0177917	-0.690998	0.197	0.243925	0.431068	-1.13966	0.00110003	-0.827623	0.0050877	-0.761795	0.00407943	-0.806006	0.00129857	-1.18824	0.00391615	-0.402031	0.0814746	-1.28237	0.000533224	-1.32487	0.00444873	-1.40775	0.000106356	1.39807	0.00401469	1.34753	0.000656885	-0.0505464	0.90634	1.37038	0.0071074	2.25475	8.78971e-07	0.884376	0.0283332	1.01584	0.000121154	1.7515	1.28976e-07	0.735663	0.000697521	1.32788	0.00290984	2.12937	5.64032e-05	0.801491	0.013874	-0.370125
valine	1.35144	0.0444147	0.796328	0.0685259	1.3513	0.0281623	0.176679	0.021709	0.240403	0.00930112	0.492376	0.000232276	1.33609	0.0203845	-0.00751506	0.973745	0.919044	0.0555326	0.161322	0.392576	-0.56344	0.0589304	0.06012	0.597292	1.20035	0.0463083	0.111333	0.86708	-1.08902	0.071364	0.645235	0.0874566	0.111189	0.575797	-0.534046	0.101198	-0.143251	0.0669335	-0.30571	0.00270252	-0.162459	0.0817861	-0.0795271	0.267743	0.00998701	0.879636	0.0895141	0.151804	1.16636
N-acetylvaline	0.452178	0.226096	-0.176993	0.752385	0.0846936	0.860372	0.0301504	0.492124	-0.0786604	0.741715	0.200723	0.346406	-0.417205	0.0869556	-1.53041	0.00375284	-1.65558	0.000311572	-0.839233	0.00158165	-1.43208	0.000677725	-1.53955	7.94936e-06	1.98814	0.00275396	2.39444	9.27847e-05	0.406298	0.440849	1.35897	0.0041953	2.02695	6.02605e-06	0.667984	0.0218499	0.87493	0.000185923	1.15607	1.10347e-05	0.281136	0.135283	0.766119	0.00355632	1.32664	1.5967e-05	0.56052	0.0294299	0.11996
leucine	2.43574	0.00733754	1.48241	0.00301083	2.41554	0.00232138	0.291743	0.000475207	0.527592	9.83518e-05	0.832298	5.72997e-05	2.36279	0.0034634	0.784866	0.00378294	1.76633	0.00389881	0.218793	0.0328519	-0.16995	0.385685	0.183082	0.0161621	1.27948	0.0736893	0.055184	0.940723	-1.2243	0.0543416	0.326154	0.184804	0.0349905	0.765312	-0.291163	0.206614	-0.298437	0.00502143	-0.541275	0.000468608	-0.242838	0.0596557	-0.0625884	0.103487	-0.000720291	0.982814	0.0618681	0.0380339	2.11123
N6-formyllysine	0	NA	0	NA	0	NA	-0.0927815	0.492124	-0.175226	0.46946	0.333536	0.478629	0.0927815	0.383154	0.175226	0.386862	0	NA	0	NA	0	NA	0.333536	0.415912	0	NA	0	NA	0	NA	0	NA	0	NA	0	NA	0.0824442	0.734493	-0.0927815	0.409325	-0.175226	0.435335	0	NA	0.333536	0.437448	0.333536	0.436077	8.10792e-17
2-aminoadipate	-1.40433e-16	0.477247	0.0134844	0.502092	0.027655	0.967455	-1.40433e-16	0.492124	-1.40433e-16	0.46946	-1.87907	0.0105834	-1.40433e-16	0.383154	-1.40433e-16	0.386862	3.0644	5.33443e-05	-1.40433e-16	0.405935	-0.0134844	0.385685	1.15768	0.0746745	-1.40433e-16	0.413127	0.38291	0.21379	0.38291	0.272883	0.0134844	0.42522	0.410565	0.250913	0.39708	0.291478	-1.40433e-16	0.409898	3.44731	8.17482e-07	3.44731	6.5148e-06	-1.40433e-16	0.465792	1.56825	0.0128888	1.56825	0.018575	0.0137131
fructosyllysine	-0.109613	0.894114	0.547874	0.451443	0.808181	0.0107224	-0.0274806	0.985097	-0.0531375	0.964218	-0.0216764	0.992123	1.91266	0.0885746	3.54914	0.000318636	1.51792	0.079299	1.99479	0.101072	2.94813	0.00167899	0.688066	0.399553	-0.0998852	0.833832	0.595516	0.149371	0.695401	0.103542	0.557602	0.425776	1.51331	0.0154642	0.955708	0.0860572	1.53659	0.221665	0.20078	0.871695	-1.33581	0.190984	1.51094	0.259979	0.206584	0.891046	-1.30435	0.229433	0.415481
uridine	-0.658991	0.00105912	-1.38494	0.0365563	-0.589383	0.0445582	-0.0367729	0.492124	-0.974269	0.038492	-0.184462	0.69923	-1.59651	5.65757e-07	-0.983638	0.00468073	-0.00779719	0.983306	-0.97429	2.7659e-06	-0.572965	0.289915	0.397123	0.279475	2.29996	5.56732e-05	2.98613	1.86724e-06	0.68617	0.0401477	1.574	0.0139574	3.05573	1.16205e-07	1.48173	0.0118308	2.91283	8.38983e-06	4.57484	6.61131e-08	1.66201	0.000535273	1.97533	0.000795234	4.42715	2.49698e-06	2.45182	0.00187004	-0.877772
6-oxopiperidine-2-carboxylate	1.54756	3.71365e-05	1.54084	0.00232899	1.16296	0.00932662	0.145961	0.492124	0.624974	4.76516e-07	0.516061	0.0251416	-0.0883802	0.383154	-0.0982559	0.386862	-0.0144621	0.971945	-1.48998	0.000106336	-1.01412	0.00301427	-0.661364	0.000660142	0.00987569	0.952974	0.715067	0.0275285	0.705191	0.0604926	0.00315889	0.988799	0.33047	0.0566289	0.327311	0.275005	-1.40433e-16	0.409898	0.788985	0.00141902	0.788985	0.00221284	0.479013	0.0467589	1.15909	0.000267038	0.680072	0.000112368	1.41712
sedoheptulose	-7.02167e-17	0.477247	-7.02167e-17	0.502092	-0.301406	0.0946012	-7.02167e-17	0.492124	-7.02167e-17	0.46946	-0.576533	0.00861591	-7.02167e-17	0.383154	-7.02167e-17	0.386862	0.291355	0.0408969	-7.02167e-17	0.405935	-7.02167e-17	0.385685	0.0162279	0.920953	-7.02167e-17	0.413127	0.472977	0.00239135	0.472977	0.0065762	-7.02167e-17	0.42522	0.171571	0.06298	0.171571	0.0763397	-7.02167e-17	0.409898	0.764332	1.63178e-06	0.764332	1.12249e-05	-7.02167e-17	0.465792	0.187799	0.275665	0.187799	0.284348	-0.100469
3-sulfo-L-alanine	0.409339	0.353593	-0.084004	0.886156	0.720353	0.21404	0.203335	0.875204	-0.112717	0.798234	-0.0727573	0.942747	0.632339	0.0880072	0.925743	0.0220075	1.11987	0.0145695	0.426334	0.543787	0.897031	0.0528118	0.326754	0.632704	0.62477	0.104325	-0.131424	0.735778	-0.756193	0.113491	0.131426	0.753899	0.17959	0.702751	0.0481639	0.937924	0.918174	0.0321519	0.356102	0.319224	-0.562071	0.135118	0.602122	0.465792	0.0800103	0.941068	-0.522112	0.436077	0.348563
methionine	-0.132685	0.501593	0.0766406	0.943058	0.436609	0.207924	-0.242077	0.244505	-0.166959	0.264044	0.185458	0.415852	1.10492	1.84118e-06	1.78513	0.00457299	1.34095	0.00137437	0.995529	0.00164866	1.54153	0.014188	1.0898	0.000164707	-0.922092	0.092431	-0.807322	0.0126437	0.114771	0.865656	-0.712767	0.238848	-0.238027	0.217	0.474739	0.40654	-0.241883	0.0195658	-0.571293	0.00169497	-0.32941	0.0459381	-0.166764	0.465792	-0.143758	0.512078	0.0230061	0.893353	0.126855
methionine sulfoxide	0.0597001	0.731885	0.25682	0.592759	0.493809	0.116192	0.217265	0.875204	-0.213969	0.553586	-0.064258	0.953016	1.87768	0.00264806	3.19761	1.4899e-05	1.94575	0.00579466	2.03524	0.0121701	2.72682	0.000152249	1.38768	0.0161621	-0.740133	0.00562623	-0.552942	0.020723	0.187192	0.521902	-0.543013	0.172999	-0.118833	0.560873	0.424181	0.283189	0.579802	0.307666	-0.48487	0.468076	-1.06467	0.0916565	0.148569	0.844023	-0.766393	0.405846	-0.914962	0.148511	0.27011
N-acetyltaurine	-0.0390035	0.477247	-1.87738	0.00468569	-1.18106	0.0445582	0	NA	0	NA	0	NA	-0.0390035	0.383154	-2.18942	0.000300332	-2.74172	5.9971e-05	0	NA	-0.312037	0.0719284	-1.56066	0.000306888	2.15041	0.000901815	2.70272	6.04028e-05	0.552304	0.332318	0.312037	0.0990525	1.56066	0.000334742	1.24863	0.00489808	0	NA	0	NA	0	NA	0	NA	0	NA	0	NA	-1.03248
cysteine sulfinic acid	0.301789	0.477247	-0.364434	0.613253	0.413651	0.562761	-0.116626	0.960498	0.0417332	0.969962	-0.472164	0.562136	1.72927	0.0462876	1.96402	0.0135885	1.04533	0.0893096	1.31086	0.130818	2.37019	0.00134126	0.15951	0.806353	0.955861	0.0829207	1.38899	0.0217883	0.433131	0.569142	0.289639	0.522015	1.50085	0.00176168	1.21122	0.0128862	1.19061	0.253115	0.705045	0.397478	-0.485563	0.435335	1.34897	0.191514	0.349507	0.772487	-0.999461	0.26322	0.117002
N-formylmethionine	-0.201993	0.0596194	-0.0859538	0.8516	-0.176002	0.180656	-0.337382	0.0455808	-0.524252	0.000341398	-0.382869	0.00993748	-1.33336	1.12024e-05	-1.52637	0.000477285	-1.15702	3.65624e-05	-1.46875	4.903e-07	-1.96467	1.76745e-05	-1.36388	3.33224e-07	1.25612	0.00269328	1.30561	7.71272e-06	0.0494846	0.885107	1.37216	0.000379295	1.3316	6.89857e-08	-0.0405634	0.849831	1.06311	7.07556e-05	1.48195	6.91753e-06	0.418842	0.00568113	0.876238	7.14971e-05	1.43646	6.23545e-07	0.560225	0.000400484	-0.15465
cysteine	-0.714256	0.00686103	-0.809549	0.0258466	-0.553977	0.212006	-0.330163	0.764192	-0.284931	0.62347	-0.591384	0.219413	0.647782	0.264743	1.45681	0.00361863	0.911896	0.0275305	1.03188	0.0943929	1.98142	0.00134028	0.874489	0.0505862	0.590612	0.0347159	1.21261	0.00436896	0.621997	0.15969	0.495319	0.0494513	1.37289	0.000209198	0.87757	0.00489808	1.39964	0.0651169	1.47672	0.023988	0.0770881	0.837002	1.44487	0.0851224	1.2155	0.0947677	-0.229365	0.692992	-0.692594
S-carboxyethylcysteine	-0.255754	0.774306	-0.422885	0.397423	-1.38566	0.00932054	-2.80867e-16	0.492124	-0.993272	0.0210876	-0.983581	0.0424134	-2.80578	0.000342714	-4.60143	1.4899e-05	-2.73871	9.05276e-05	-2.55002	0.00164866	-5.17181	1.50542e-06	-2.33663	0.000203323	2.78892	0.0015962	1.80845	0.00860018	-0.980468	0.0515234	2.62179	0.00685006	0.678544	0.269205	-1.94325	0.000745254	0.993272	0.018326	1.87552	3.80332e-05	0.882245	0.0579632	-2.80867e-16	0.465792	0.891937	0.0238068	0.891937	0.0297674	-0.688101
N-acetylmethionine	-0.178396	0.630685	-0.231871	0.502092	-0.579545	0.0120633	-0.485632	0.057794	-0.273116	0.0256176	0.0641753	0.832337	-1.86744	4.66505e-05	-2.23136	2.52712e-05	-1.91467	1.4464e-06	-2.17468	7.12456e-05	-2.27261	4.14222e-06	-1.27095	0.000517883	1.39791	0.00200424	1.73061	4.07589e-05	0.332695	0.192479	1.34444	0.0041953	1.32946	0.00088715	-0.0149795	0.955772	1.03399	0.000214762	1.68338	6.24979e-06	0.649384	0.00201231	1.24651	0.000231755	2.23319	2.84201e-05	0.986676	0.00262957	-0.329937
cystine	0.405373	0.0812476	0.361706	0.21093	0.60645	0.110462	0.0773463	0.875781	0.15823	0.571583	0.081012	0.860824	0.364032	0.149398	-0.128232	0.413895	0.478596	0.14795	0.0360048	0.903937	-0.331708	0.258125	-0.0468419	0.872852	0.255042	0.0293393	-0.206505	0.363665	-0.461548	0.103542	0.211375	0.452279	-0.00542838	0.988515	-0.216804	0.497118	-0.237221	0.409898	-0.0919407	0.771191	0.145281	0.610528	-0.156338	0.586984	-0.088275	0.811267	0.0680628	0.819742	0.457843
2-hydroxy-4-(methylthio)butanoic acid	0.881984	0.13712	1.13258	0.18678	0.755816	0.00243347	0.352208	0.114449	0.297789	0.236322	0.00619607	0.988092	-1.87539	0.000538625	-2.13458	0.000999241	-0.467529	0.0195335	-2.40517	0.000147734	-2.96937	0.00062256	-1.21715	1.10926e-05	0.918282	0.119028	0.0559512	0.876313	-0.862331	0.106126	1.16888	0.100671	-0.0702172	0.860565	-1.2391	0.0466923	0.659092	0.00280077	1.46381	5.39257e-06	0.804719	0.00196548	0.604673	0.0427886	1.1178	0.00029625	0.513126	0.0297674	0.923461
phenylpyruvate	-3.92615	0.00118286	-1.23047	0.0365563	-1.65587	0.000537544	-4.02598	7.3774e-07	-3.72362	1.98112e-05	-1.14368	0.00014051	-1.29246	0.0100875	-0.706638	0.0217486	-2.27812	5.48824e-06	-1.39229	0.0468959	-3.19979	0.000190608	-1.76593	2.54656e-05	-0.415375	0.363585	-0.368583	0.330987	0.0467918	0.895868	2.28031	0.0164446	1.9017	0.0114366	-0.378611	0.367356	0.170451	0.424538	-1.35424	0.000411595	-1.52469	4.56983e-05	0.472809	0.287739	1.52806	1.92322e-07	1.05526	0.022376	-2.27083
phenyllactate (PLA)	0.0062369	0.954868	-0.118055	0.752385	-0.0333654	0.886028	0.135257	0.122395	-0.0849581	0.59633	-0.190511	0.147228	-1.33444	5.65757e-07	-1.62862	1.4899e-05	-1.12548	4.70845e-05	-1.20542	2.53232e-06	-1.59552	0.000617928	-1.28263	2.22335e-06	0.899274	0.000550742	1.03762	2.29043e-05	0.138346	0.415854	0.774983	0.0363709	0.998018	1.19605e-05	0.223035	0.464177	0.605098	0.000413167	1.24658	2.84211e-06	0.641482	0.00161568	0.384883	0.0261179	0.920812	6.29314e-06	0.535929	0.00478521	-0.0483943
N-acetylphenylalanine	0.116349	0.480034	-0.0350824	0.943058	0.693506	0.0623731	-0.755492	0.0039114	-0.35734	0.0162694	-0.160424	0.491432	-0.4173	0.0236449	-1.36359	0.00299678	-0.743723	0.0178251	-1.28914	6.85544e-05	-1.68585	2.56782e-05	-1.59765	8.11145e-05	1.49317	0.00377771	1.24849	0.000973115	-0.24468	0.597014	1.34174	0.000379295	1.82565	9.42906e-06	0.483908	0.0506736	0.546875	0.00353436	0.922065	0.000420406	0.37519	0.0209017	0.945027	0.00135699	1.51713	0.000106205	0.572106	0.022376	0.258257
phenylacetate	-1.79431	7.87874e-07	-2.63983	0.0246418	-0.456951	0.128166	0	NA	0	NA	0	NA	-1.79431	5.29621e-07	-3.57899	5.02812e-05	-4.53619	5.05905e-07	0	NA	-0.939165	0.174996	-4.07924	3.16264e-08	1.78469	0.00402311	2.74188	3.7218e-06	0.957192	0.0935884	0.939165	0.212494	4.07924	1.88411e-08	3.14007	0.00219849	0	NA	0	NA	0	NA	0	NA	0	NA	0	NA	-1.63036
phenylalanine	4.12263	0.0218698	1.82286	0.00398381	2.79019	0.00383957	0.701214	2.17166e-05	1.02726	8.91039e-05	1.54027	8.91452e-05	3.4243	0.0239106	0.391156	0.267328	1.21141	0.0695707	0.00288722	0.98667	-0.404451	0.0191457	-0.0385187	0.592255	2.67232	0.0752636	1.39838	0.33534	-1.27395	0.118043	0.372559	0.070299	0.0659428	0.560873	-0.306617	0.0917579	-0.360821	0.0317744	-0.814518	0.00230818	-0.453697	0.0775661	-0.0347788	0.465792	0.0245369	0.471318	0.0593157	0.0819169	2.91189
5-methylthioadenosine (MTA)	0.0481406	0.947651	-0.1942	0.8516	-0.106308	0.871554	-0.22726	0.492124	0.705705	0.0266512	1.98172	5.72996e-05	-1.08392	0.0369719	-0.60595	0.0253695	-0.724704	0.0276983	-1.35932	0.0234257	0.293956	0.66114	1.36332	0.000890275	-0.101725	0.836352	0.10624	0.84543	0.207965	0.557389	-0.344065	0.673487	-0.0482085	0.943806	0.295857	0.726269	0.376247	0.00581651	0.465457	0.0568598	0.08921	0.683144	1.30921	0.00970135	2.67444	1.04179e-05	1.36523	0.00187004	-0.0841224
nicotinate	0.0755004	0.630685	0.0262352	0.902433	-0.0710217	0.677713	-0.217228	0.0797164	-0.152818	0.236322	-0.199648	0.0501406	0.314241	0.0165887	0.0342128	0.776389	0.0201628	0.843441	0.021512	0.883999	-0.14484	0.291204	-0.108464	0.310323	0.60043	0.00224301	0.908506	5.22268e-05	0.308076	0.0469852	0.551165	0.0157688	0.761984	0.000316619	0.210819	0.211951	0.320402	0.0246335	0.614428	0.000108093	0.294026	0.0317497	0.384813	0.00495964	0.632008	0.000119532	0.247196	0.0124111	0.010238
4-acetamidobutanoate	-1.02841	0.0179856	-2.61236	0.0188042	-1.36773	0.00176779	0.335273	0.538464	0.234924	0.304539	-0.00511018	0.992123	-5.79132	1.97946e-06	-5.97828	8.47921e-06	-5.93429	1.13986e-06	-4.42764	2.53232e-06	-3.13099	0.000769639	-4.57167	2.07853e-06	0.650952	0.180263	1.372	0.000348755	0.721043	0.167893	-0.932997	0.19925	1.03267	0.00691168	1.96567	0.0133689	0.464001	0.335313	1.22902	0.026809	0.765023	0.0401307	0.363652	0.259979	0.888641	0.0402037	0.524989	0.179555	-1.6695
indoleacetate	-0.406804	0.329503	-1.86634	0.0223803	-0.317574	0.36034	0	NA	0	NA	0	NA	-0.406804	0.217633	-2.41781	0.000306341	-3.31597	4.40208e-06	0	NA	-0.551467	0.144154	-2.9984	9.15086e-10	2.011	0.00518276	2.90917	0.000105366	0.898163	0.118902	0.551467	0.184176	2.9984	9.08308e-10	2.44693	0.000263778	0	NA	0	NA	0	NA	0	NA	0	NA	0	NA	-0.863574
N-formylanthranilic acid	0.0913514	0.477247	-0.0391743	0.901627	0.168008	0.50534	0.0566469	0.855552	-0.264404	0.112181	0.0945055	0.657166	0.1938	0.0796031	0.351326	0.113185	0.188311	0.357092	0.159095	0.405935	0.126096	0.385685	0.114808	0.477698	0.1641	0.413127	0.104602	0.412538	-0.0594985	0.835975	0.0335744	0.833322	0.181258	0.32353	0.147684	0.438124	0.321627	0.043529	0.0991127	0.587458	-0.222514	0.255553	0.000575528	0.99699	0.136971	0.445252	0.136396	0.407343	0.0733951
xanthurenate	-0.715373	0.0218698	-0.928941	0.136662	-0.769898	0.0524137	0	NA	0	NA	0	NA	-1.42805	8.2228e-06	-1.04038	0.0401642	-1.72443	2.19432e-05	-0.712674	0.00399364	-0.111442	0.385685	-0.954527	0.00253966	-0.387664	0.42324	0.296378	0.203248	0.684042	0.246696	-0.601232	0.0417329	0.241853	0.441949	0.843085	0.0159313	0	NA	0	NA	0	NA	0	NA	0	NA	0	NA	-0.804738
anthranilate	0.850342	0.0346351	1.12081	0.0509919	0.645496	0.0324701	0.964796	0.000284365	1.07004	0.059424	0.738953	0.0550942	-1.44908	0.000229507	-1.38399	0.00358053	-1.06417	0.00904591	-1.33463	0.000430892	-1.43476	0.016707	-0.97071	0.00120517	0.104336	0.79885	0.0626296	0.850573	-0.0417062	0.932621	0.374803	0.273815	-0.142217	0.52583	-0.51702	0.0956514	0.169427	0.26611	0.447546	0.111899	0.278118	0.400189	0.274676	0.604987	0.221704	0.412616	-0.0529727	0.905312	0.872216
indolelactate	-0.670799	0.44031	-0.49602	0.719966	-0.757831	0.540041	2.80867e-16	0.492124	-0.114732	0.46946	-0.0802162	0.478629	-1.24672	0.0228291	-1.78831	0.019775	-1.98521	0.0108695	-0.575922	0.233948	-1.40703	0.102149	-1.3076	0.0652471	0.656325	0.413127	0.818707	0.31382	0.162382	0.884396	0.831104	0.42522	0.731675	0.376096	-0.0994294	0.938003	0.114732	0.409898	0.0802162	0.409325	-0.034516	0.840558	2.80867e-16	0.465792	2.80867e-16	0.437448	2.80867e-16	0.436077	-0.64155
kynurenate	0.081199	0.647854	-0.166792	0.73341	-0.0649247	0.886028	-0.00204253	0.994038	-0.450767	0.00456413	-0.74219	0.0238785	-2.25388	1.94195e-06	-1.33971	0.00223655	-1.44213	0.000194491	-2.33712	9.11457e-05	-1.62369	8.91725e-05	-2.1194	4.42728e-05	-0.236157	0.466746	0.516668	0.0185976	0.752825	0.0831741	-0.484148	0.0707495	0.370544	0.0954186	0.854692	0.0129709	0.678011	0.00280077	1.32842	0.000140204	0.650407	0.00575932	0.229287	0.513578	0.588271	0.155452	0.358985	0.179555	-0.0501725
N-acetyltryptophan	0.119255	0.762134	-0.226756	0.618635	0.447299	0.0394035	-0.565779	0.000117501	-0.231458	0.454227	-0.378576	0.113117	-0.138966	0.524898	-1.52818	0.00298846	-1.01373	0.000631802	-0.823999	0.00792996	-1.53288	8.48971e-05	-1.83961	7.77439e-06	1.37094	0.0118638	1.08483	0.00176305	-0.286105	0.47484	1.02493	0.00926517	1.41288	0.000489776	0.387949	0.0392073	-0.0182795	0.908788	0.210065	0.227917	0.228344	0.366847	0.316041	0.140895	0.397268	0.0183614	0.0812266	0.712719	0.113266
tryptophan	4.74578	0.0118396	2.53804	0.00178679	4.23979	0.00176779	0.979628	1.72411e-06	1.33543	7.67974e-05	2.08259	5.72996e-05	3.77147	0.0163728	0.685168	0.114767	2.12502	0.0185572	0.00531969	0.968832	-0.517448	0.0127255	-0.0321724	0.794196	2.59668	0.0847264	0.530087	0.730606	-2.06659	0.0557334	0.388939	0.0853425	0.0240912	0.88949	-0.364848	0.0978488	-0.489629	0.0194204	-1.11636	0.000783906	-0.626735	0.044262	-0.133829	0.0359615	-0.0134009	0.886328	0.120428	0.208996	3.8412
4-hydroxyphenylpyruvate	-4.20721	0.000418745	-2.59415	0.0052932	-3.17256	2.87806e-06	-2.10618	6.10011e-05	-2.72884	3.27262e-06	-2.73793	3.36412e-06	-3.05116	1.58896e-06	-2.05493	0.00038478	-1.61913	1.4464e-06	-0.950128	0.173038	-2.18962	0.00136306	-1.1845	0.000825808	0.019738	0.954107	0.386119	0.0254187	0.366381	0.332318	1.6328	0.0753336	1.42078	0.0420864	-0.212027	0.704138	1.01596	0.00262469	1.81814	9.0868e-06	0.802179	0.00142866	0.393308	0.144416	1.1864	0.000828561	0.793092	0.00871155	-3.32464
o-Tyrosine	0.905003	0.325291	-0.0924958	0.943058	1.33171	0.22799	1.85172	0.0195084	0.508288	0.68006	0.654921	0.526013	0	NA	0.423325	0.644294	0.105887	0.855601	0.946714	0.343617	1.02411	0.332114	-0.570903	0.632704	1.11539	0.101165	0.280714	0.412538	-0.834674	0.313168	0.11789	0.906177	0.707422	0.527042	0.589532	0.640278	1.53871	0.105471	0.386601	0.409325	-1.15211	0.254459	0.195285	0.845318	-0.810194	0.437448	-1.00548	0.424961	0.714739
N-formylphenylalanine	0.486781	0.44031	1.02657	0.21093	1.48923	0.0885183	0.893042	0.492124	0.144932	0.743947	0.164593	0.928236	0.27313	0.383154	1.10294	0.00449833	0.95686	0.234464	0.679391	0.444514	0.221302	0.72415	-0.367775	0.702393	0.0606093	0.413127	2.80867e-16	0.412538	-0.0606093	0.459279	0.6004	0.454519	1.00245	0.244468	0.402047	0.709549	0.89042	0.0952172	0.683729	0.422681	-0.206691	0.808937	0.142311	0.875877	-0.0447193	0.971525	-0.18703	0.788491	1.00086
carboxy-methyl-arginine	0.0879161	0.93191	0.462628	0.631166	0.565514	0.36034	-0.0544963	0.985097	-0.0317179	0.977815	-0.0980821	0.975431	2.7978	0.0397425	4.51977	0.000263391	3.11592	0.016506	2.65539	0.0560379	4.02543	0.00117839	2.45233	0.0684368	0.158376	0.801288	-0.515755	0.412538	-0.674131	0.26741	0.533088	0.518226	-0.038158	0.962866	-0.571246	0.471332	1.88035	0.194834	-0.197631	0.890248	-2.07798	0.121523	1.90313	0.212159	-0.241217	0.900371	-2.14435	0.177128	0.372019
urea	-4.76862	3.84589e-05	-4.65991	0.00103976	-3.3009	1.05458e-05	-2.7624	3.15292e-06	-5.14761	1.57626e-07	-6.27001	4.57641e-09	-3.38507	6.57624e-07	-1.47633	0.000175874	-0.418609	0.0275305	-1.37884	0.0180571	-1.96402	0.020076	-3.38772	1.67983e-06	0.476467	0.00895246	0.541149	0.000961866	0.0646827	0.670946	0.585183	0.502087	2.00888	0.0036892	1.4237	0.0978488	2.38521	5.50959e-05	3.50761	7.35524e-07	1.1224	0.0016693	1.12347e-15	0.465792	1.12347e-15	0.437448	1.12347e-15	0.436077	-4.24314
citrulline	-0.313253	0.285924	-0.178503	0.555751	-0.0281076	0.954381	-0.358375	0.122395	0.0825452	0.741715	-0.125161	0.526013	-0.436539	0.0958186	-0.67395	0.029823	-0.312731	0.172908	-0.481661	0.0133709	-0.412903	0.0180108	-0.409785	0.0842602	0.0856496	0.764697	0.0143758	0.95533	-0.0712738	0.850888	0.2204	0.25109	0.299521	0.167387	0.0791212	0.703731	-0.151762	0.526796	0.138184	0.423601	0.289946	0.140132	0.289158	0.076133	0.371397	0.0687934	0.0822393	0.694177	-0.173288
hydroxyproline	0.297969	0.372416	0.0615988	0.816032	0.0122563	0.966464	-0.0271323	0.530975	-0.0340643	0.519501	0.0295715	0.574211	0.492782	0.0616903	-0.214063	0.0368912	-0.0151042	0.92358	0.167681	0.108422	-0.309726	0.0852394	0.00221104	0.970773	0.640662	0.0352948	0.397338	0.161812	-0.243324	0.211404	0.404293	0.0776564	0.111626	0.310359	-0.292667	0.132686	-0.0661827	0.143964	-0.110548	0.00617791	-0.0443657	0.24263	-0.0731147	0.191811	-0.0538446	0.348514	0.0192701	0.729692	0.123941
proline	-1.2479	0.138241	-1.1092	0.0620279	-0.43449	0.0690318	-1.55945	0.0108313	-1.40704	0.11576	-0.833934	0.0582518	2.07189	0.0170075	1.47952	0.0211598	0.444997	0.210863	1.76033	0.000692756	1.18168	0.0834594	0.0455521	0.838535	1.45143	0.0718593	1.95749	0.0105926	0.506065	0.272883	1.59012	0.00540718	2.7709	5.04992e-06	1.18078	0.00253082	0.859059	0.194834	0.330604	0.480914	-0.528456	0.366006	1.01147	0.207855	1.05612	0.00819145	0.0446477	0.939912	-0.930529
N-acetylproline	-0.245905	0.0584936	-0.399443	0.260312	-0.233685	0.453892	0.916719	0.00236069	0.697201	0.00128257	0.264127	0.199341	-0.00355027	0.980392	-0.403221	0.0802206	0.373513	0.085424	1.15907	0.000198232	0.693422	0.010146	0.871324	0.00241258	0.527626	0.0426057	0.384523	0.0420079	-0.143103	0.629382	0.374089	0.113464	0.396744	0.0587039	0.0226547	0.941951	0.127955	0.409283	0.761586	0.00117095	0.63363	0.00289132	-0.0915635	0.671735	0.108993	0.633711	0.200557	0.292235	-0.293011
ornithine	0.355926	0.753187	1.10584	0.0993844	1.14313	0.225252	-0.536473	0.225455	-0.96606	0.0859814	-0.805307	0.269439	-1.00356	0.135305	-0.540662	0.253502	1.85512	0.0325172	-1.89596	0.0354861	-2.61256	0.00066462	-0.0933192	0.871024	0.89639	0.217765	0.497228	0.605187	-0.399162	0.658524	1.6463	0.0874566	1.28443	0.0976525	-0.361872	0.465314	1.35929	0.011402	3.35591	2.94407e-06	1.99662	0.00221458	0.929702	0.0740184	3.08707	0.00123867	2.15737	0.0126573	0.868298
2-oxoarginine*	0.598781	0.0812476	0.966474	0.089175	1.76501	0.00383957	0.0286363	0.972766	-0.0902785	0.8399	0.738057	0.11309	1.02662	0.0286479	0.887278	0.0334409	1.15277	0.0275305	0.45648	0.167955	-0.169475	0.651236	0.12582	0.685228	0.266805	0.328861	-0.385497	0.332782	-0.652302	0.152255	0.634498	0.203716	0.780731	0.012285	0.146233	0.769783	0.127458	0.79963	-0.259349	0.575936	-0.386807	0.435335	0.00854341	0.97452	0.450072	0.250087	0.441528	0.180867	1.11009
2,3-dihydroxyisovalerate	-1.32355	3.84589e-05	-1.4914	0.00103976	-1.24178	0.000246054	-1.02916	0.000614732	-0.929071	0.00044702	-1.02502	5.72996e-05	-2.18115	2.60331e-06	-2.47097	1.4899e-05	-1.82796	1.4464e-06	-1.88676	2.31589e-06	-1.90864	9.2448e-06	-1.61119	7.04668e-06	0.566333	0.0342554	-0.021327	0.875057	-0.58766	0.0477903	0.398482	0.041161	0.0604428	0.726859	-0.33804	0.0694785	0.276505	0.17473	0.331861	0.0621825	0.0553567	0.600707	0.376596	0.0445968	0.336006	0.0256815	-0.0405908	0.7957	-1.35225
2,3-dihydroxy-3-methylvalerate	-0.673915	0.282022	-0.684714	0.146397	-0.76964	0.0324701	-2.80867e-16	0.492124	0.169495	0.293819	-1.63281	0.000583704	-1.88249	2.67262e-05	-3.13524	2.26651e-07	-0.347482	0.228604	-1.20858	0.0192591	-2.28103	0.000342285	-1.21065	0.000813906	1.25274	0.00154736	0.393986	0.240218	-0.858758	0.0229178	1.24194	0.0655857	0.298261	0.506883	-0.943683	0.03201	-2.80867e-16	0.409898	1.929	1.28362e-06	1.929	1.04853e-05	0.169495	0.311122	0.29619	0.272746	0.126695	0.652454	-0.709423
3-amino-2-piperidone	-0.0862005	0.886763	-0.5232	0.107763	-0.659173	0.441103	-0.244685	0.492124	-0.772716	0.00289169	-0.909176	0.00163908	-0.742802	0.0321764	-0.979313	0.000499784	-0.324326	0.607452	-0.901286	0.0770375	-1.22883	0.000901177	-0.574329	0.0332489	1.6348	0.00115681	1.94104	0.0160454	0.306237	0.670946	1.1978	0.0370466	1.36806	0.00734401	0.170263	0.574012	1.39829	0.000214762	2.35951	8.70728e-07	0.961224	0.000479789	0.870259	0.0175337	1.69502	0.000347863	0.824764	0.00532584	-0.422858
N6-carboxymethyllysine	1.40433e-16	0.477247	1.40433e-16	0.502092	1.40433e-16	0.540041	-0.0285113	0.943001	-0.19723	0.798234	-0.0823542	0.854171	0.117263	0.383154	0.922116	0.0802206	0.222821	0.412538	0.088752	0.405935	0.724886	0.0734352	0.140467	0.415912	1.40433e-16	0.413127	1.40433e-16	0.412538	1.40433e-16	0.459279	1.40433e-16	0.42522	1.40433e-16	0.436089	1.40433e-16	0.448239	0.804853	0.194834	0.105558	0.727917	-0.699295	0.266542	0.636134	0.207549	0.0517149	0.848413	-0.584419	0.24084	8.10792e-17
diacetylchitobiose	-0.552543	0.365691	-0.920192	0.108855	0.119198	0.918636	1.40433e-16	0.492124	-0.350936	0.107276	-0.60128	0.0969492	-1.30722	7.22209e-05	-0.724837	0.105109	-1.03345	0.149196	-0.754678	0.1151	-0.155581	0.385685	-1.75392	0.000253802	-0.231448	0.59212	0.327505	0.609375	0.558953	0.496386	-0.599097	0.248875	0.999246	0.075536	1.59834	0.00246129	0.350936	0.0994884	0.60128	0.0716836	0.250344	0.503591	1.40433e-16	0.465792	1.40433e-16	0.437448	1.40433e-16	0.436077	-0.451179
erythronate*	-0.112977	0.183672	-0.138263	0.613253	-0.30217	0.180656	0.0554674	0.972766	-0.0313809	0.974378	-0.0682336	0.935457	-0.183799	0.70985	0.381875	0.319725	-0.133333	0.709336	-0.0153553	0.98667	0.488757	0.257541	0.100604	0.788467	0.671115	0.00122279	0.633262	0.00261543	-0.0378527	0.872629	0.645829	0.0159723	0.444069	0.00277633	-0.20176	0.365409	1.23679	0.106473	0.683729	0.279425	-0.55306	0.306548	1.14994	0.167822	0.560028	0.437448	-0.589913	0.339554	-0.18447
trehalose	-0.205254	0.86381	-0.871601	0.188716	-0.716961	0.45639	0.21842	0.492124	0.774824	0.326645	0.122095	0.77864	-1.06486	0.173529	-4.17143	2.02268e-05	-1.28294	0.0929806	-0.641181	0.36934	-2.52501	0.00629977	-0.443889	0.229598	3.82075	0.00155993	4.241	0.00196867	0.420244	0.5766	3.15441	0.00809283	3.72929	0.000347184	0.574884	0.390166	0.714176	0.12374	4.02291	9.00261e-07	3.30873	0.000253189	1.27058	0.0818409	3.92658	3.64511e-06	2.65601	0.00245107	-0.597939
mannitol/sorbitol	2.01252	0.116561	0.719461	0.349854	0.133249	0.918636	-0.34687	0.675807	0.0206347	0.990753	-0.258841	0.704512	0.898056	0.147665	1.86203	0.0242993	0.0796727	0.936931	-1.46134	0.206334	1.1632	0.385685	-0.312418	0.373858	0.0809598	0.811494	0.516527	0.513453	0.435568	0.622211	-1.2121	0.321385	-1.36275	0.188927	-0.150644	0.828294	1.04493	0.292374	-0.301856	0.665979	-1.34679	0.146013	1.41243	0.457875	-0.213828	0.682314	-1.62626	0.296891	0.955077
glucose	0.0643181	0.934969	0.28825	0.840958	-0.0784825	0.903346	0.387973	0.492124	0.155605	0.412037	0.16804	0.771352	0.421454	0.355395	-0.546588	0.430473	-0.679515	0.172703	0.74511	0.27618	-0.679233	0.312151	-0.432993	0.167716	0.33536	0.690271	0.0858804	0.8623	-0.24948	0.786519	0.559292	0.518226	-0.0569203	0.943806	-0.616212	0.41614	-0.632682	0.0488368	-1.01509	0.0417076	-0.382407	0.391643	-0.865051	0.029422	-1.23502	0.00646428	-0.369973	0.175649	0.0913618
lactate	-0.228268	0.504259	-0.683259	0.101575	-0.6165	0.187328	-0.374194	0.613114	0.564417	0.593902	1.65654	0.0296664	-0.527716	0.264151	-0.00727161	0.994359	-0.535577	0.412538	-0.673642	0.215987	1.2404	0.0628211	1.73746	0.000326721	0.876555	0.028297	1.11842	0.0139566	0.241862	0.569142	0.421565	0.212494	0.730185	0.027258	0.308621	0.374615	1.397	0.138314	1.11056	0.126251	-0.286443	0.759995	2.33561	0.0223906	3.14129	0.00023627	0.805681	0.263925	-0.509342
glycerate	-0.155089	0.477247	0.0173536	0.968364	-0.512939	0.0648138	-0.0198094	0.985097	-0.0782367	0.859756	-0.218385	0.491432	-2.72231	2.67262e-05	-2.79238	4.01915e-05	-2.65195	8.79886e-06	-2.58703	9.03583e-05	-2.88797	0.000277084	-2.3574	1.38978e-05	1.22009	0.00132054	0.899094	0.00179809	-0.321	0.331198	1.39254	0.0161334	0.541244	0.0163555	-0.851293	0.0573481	1.15003	0.0180232	0.969452	0.0145056	-0.180576	0.525133	1.0916	0.0427886	0.770877	0.0786878	-0.320724	0.436077	-0.216892
pyruvate	-0.447406	0.00130172	-0.394311	0.031387	-0.314896	0.322635	-0.00310956	0.985097	0.147274	0.343875	0.0845007	0.480924	-0.44791	0.000342714	-0.657109	0.00149331	-0.48859	0.0372843	-0.00361357	0.98667	-0.115523	0.270999	-0.0891925	0.632704	0.0360622	0.788737	0.115951	0.586062	0.0798892	0.775609	0.0891575	0.271736	0.248461	0.158425	0.159304	0.360561	-0.173136	0.137715	0.075272	0.326973	0.248408	0.0234854	-0.0227524	0.880846	0.162882	0.293572	0.185635	0.254122	-0.385538
3-phosphoglycerate	0.239061	0.630685	-0.163323	0.67318	0.359789	0.546635	0.567242	0.0598606	0.382407	0.296196	-0.101177	0.794413	-1.13092	0.00256664	-2.21275	5.02812e-05	-2.01645	0.00262415	-0.802744	0.0741464	-1.66702	0.000985785	-2.47741	4.32197e-06	1.22746	0.0111475	2.19348	0.00173481	0.966013	0.105655	0.82508	0.0655857	2.31421	0.000117014	1.48913	0.000385378	0.145642	0.174356	1.30796	0.000363385	1.16231	0.00192307	-0.0391926	0.918885	0.639537	0.052939	0.678729	0.0855173	0.145175
isoleucine	1.69523	0.0145474	0.786007	0.00969538	1.84409	0.00543291	0.177004	0.000415316	0.27941	0.000515239	0.331315	0.000814489	1.55771	0.00963442	0.296615	0.0471304	1.43194	0.00701282	0.0394787	0.470586	-0.209981	0.139273	-0.0808357	0.112064	1.12151	0.0503019	-0.0757468	0.903648	-1.19725	0.0407143	0.212284	0.184804	0.0731132	0.244632	-0.139171	0.350642	-0.139582	0.00442958	-0.201512	0.00249451	-0.06193	0.291864	-0.0371757	0.465792	-0.0472011	0.342798	-0.0100254	0.844574	1.44178
cytidine	-1.37628	0.037151	-0.954271	0.140858	-1.72572	0.116192	-1.40433e-16	0.492124	-0.301525	0.143036	-0.46553	0.130042	-1.37628	0.0199787	-1.01857	0.0401642	-2.40245	0.0162218	-1.40433e-16	0.405935	-0.365822	0.198851	-1.14226	0.00654017	-0.0561906	0.931865	1.49169	0.128113	1.54788	0.152255	0.365822	0.238848	1.14226	0.00715105	0.776433	0.112551	0.301525	0.126734	0.46553	0.0992227	0.164005	0.612905	-1.40433e-16	0.465792	-1.40433e-16	0.437448	-1.40433e-16	0.436077	-1.35209
ribulose/xylulose	-0.229942	0.353593	-0.321844	0.188716	-0.324753	0.286313	0.252328	0.0950763	0.707388	0.000485423	1.42841	0.0011525	-1.95365	7.81819e-07	-1.83489	8.47921e-06	-1.4925	0.000283432	-1.47138	5.82964e-05	-0.80566	0.00164913	0.260671	0.35738	0.0451004	0.737677	0.0509837	0.84543	0.00588332	0.988833	-0.0468016	0.848902	-0.0438266	0.860565	0.00297496	0.988825	0.163854	0.271245	0.512135	0.00414671	0.348281	0.0245531	0.618915	0.000893665	1.68822	0.000217558	1.06931	0.0066601	-0.29218
ribitol	0.0305707	0.679041	-0.180925	0.439957	-0.0231256	0.918636	0.0647657	0.442217	0.0131086	0.947282	0.0247187	0.823688	-0.303236	0.000101562	-0.751027	0.000439606	-0.294058	0.00782829	-0.269041	0.0044079	-0.556993	0.00981673	-0.246213	0.0768847	0.347077	0.0168554	0.0751977	0.346727	-0.271879	0.0921251	0.135581	0.42522	0.0215014	0.890068	-0.11408	0.5649	-0.100714	0.289593	0.084376	0.184574	0.18509	0.082525	-0.152371	0.260024	0.044329	0.601074	0.1967	0.151804	-0.0578267
arabonate/xylonate	0.0886685	0.721796	0.306935	0.639756	-0.236189	0.540041	0.730393	0.268557	0.211965	0.593902	0.265117	0.649471	-1.84012	0.00144236	-1.48708	0.00117787	-1.75092	0.00232103	-1.1984	0.00748621	-1.58205	0.0139608	-1.24961	0.00899596	0.775063	0.0113102	0.4851	0.0925174	-0.289963	0.445033	0.99333	0.0937145	0.160242	0.48508	-0.833088	0.124056	1.1281	0.0417238	0.574301	0.264431	-0.553799	0.200038	0.609673	0.209581	0.109025	0.865222	-0.500647	0.339554	0.0531379
ribonate	-0.0595069	0.526061	-0.0926755	0.816032	-0.124101	0.685633	0.0313941	0.972766	-0.0363672	0.947282	-0.196627	0.523209	-0.903231	0.0198979	-0.819747	0.0148445	-0.766385	0.00389881	-0.81233	0.040316	-0.763439	0.051267	-0.838912	0.0105773	0.975649	0.00122279	1.08507	7.61401e-05	0.10942	0.658524	0.942481	0.00934604	1.02048	0.000240903	0.0779951	0.811796	1.05913	0.0297053	1.22192	0.00544721	0.162782	0.564467	0.991372	0.076133	0.993894	0.0359638	0.00252255	0.993224	-0.0920943
ribose	0.0195011	0.955553	-0.384795	0.389257	-0.419001	0.180461	0.327773	0.0373366	-0.5293	0.176093	-1.02381	0.00093518	-1.71441	5.30324e-05	-1.5609	0.00122068	-0.803282	0.000792757	-1.40614	0.000575843	-1.7054	0.000765121	-1.40809	0.000497786	0.794506	0.0468058	1.34306	0.000656885	0.548557	0.11947	0.39021	0.270225	0.904561	0.012383	0.514351	0.130481	0.948024	0.00280077	2.25419	8.04317e-09	1.30617	0.000491306	0.0909503	0.755875	0.902613	0.00231844	0.811663	0.0297674	-0.261431
threonate	1.23919	0.232474	0.0358496	0.943058	-0.766512	0.760794	1.05382	0.492124	0.900693	0.650446	1.37541	0.37392	-1.40631	0.261467	-1.56864	0.248608	-1.04554	0.47428	-1.59169	0.130818	-0.703794	0.493546	1.09638	0.424521	1.90599	0.0528828	1.04935	0.412538	-0.856642	0.459279	0.702643	0.00407141	-0.95636	0.452322	-1.659	0.211951	1.74366	0.341733	1.41012	0.334415	-0.333544	0.845034	1.59053	0.408534	1.73171	0.18216	0.141173	0.905312	0.169511
CMP	-0.305992	0.762134	-0.16277	0.67318	0.101217	0.918636	2.80867e-16	0.492124	2.80867e-16	0.46946	-1.71342	0.0132478	-1.14632	0.100315	-2.38091	5.02812e-05	-0.825327	0.175854	-0.840328	0.162821	-2.21814	1.50542e-06	-2.63996	0.000791672	1.23459	0.1123	2.66952	0.0103509	1.43493	0.0707985	1.37781	0.0494513	3.07673	0.000513603	1.69892	0.000315691	2.80867e-16	0.409898	2.99051	6.31352e-07	2.99051	6.07968e-06	2.80867e-16	0.465792	1.2771	0.0313848	1.2771	0.0375927	-0.122515
biotin	0.0627431	0.666792	0.0806881	0.73341	0.0386338	0.900728	-0.107696	0.492124	-0.0151867	0.8399	0.179521	0.37392	-0.0546884	0.551161	-0.397493	0.00212172	-0.241681	0.210863	-0.225128	0.101072	-0.493367	0.0141867	-0.100794	0.48915	0.192405	0.165094	-0.13267	0.418843	-0.325075	0.098022	0.21035	0.27267	-0.156779	0.239905	-0.367129	0.0927049	-0.150399	0.00912684	-0.319662	0.0357511	-0.169264	0.27019	-0.0578894	0.642023	-0.0324452	0.865222	0.0254441	0.816132	0.0606883
folate	-0.105768	0.44031	-0.0680714	0.816032	-0.0915293	0.36034	-0.0360379	0.775509	-0.0684286	0.205718	-0.0357357	0.573176	-0.216495	0.0361255	-0.337344	0.0471659	-0.158899	0.0780094	-0.146766	0.171139	-0.337701	0.0314179	-0.103106	0.0614491	0.219008	0.218383	-0.00831495	0.927804	-0.227323	0.258881	0.256704	0.149073	0.00592353	0.962866	-0.25078	0.109734	0.0981593	0.240157	0.0492813	0.542974	-0.048878	0.422045	0.0657686	0.457875	0.0495835	0.437448	-0.0161851	0.723158	-0.0884561
5-aminolevulinate	-0.821751	0.00662474	-0.90397	0.00949104	-0.887523	0.00208507	-1.41527	0.0020244	-0.946682	0.00146793	-0.713397	0.0296664	-1.95243	0.00016187	-2.16543	1.4899e-05	-2.07935	1.4464e-06	-2.54594	2.53232e-06	-2.20814	1.49565e-05	-1.90523	0.000102675	0.259801	0.208978	0.518304	0.0185976	0.258503	0.209815	0.177582	0.42522	0.452532	0.0221534	0.27495	0.218171	0.0468009	0.865382	0.391381	0.155667	0.34458	0.0661089	0.515386	0.0261179	1.09325	0.00501464	0.577865	0.0886227	-0.871081
1-methylnicotinamide	-0.144123	0.894114	-0.248872	0.737795	-0.0775096	0.954381	0.294148	0.775509	0.00189605	0.996755	-0.466571	0.375035	-0.786111	0.383154	-1.23919	0.032354	-0.134702	0.837451	-0.34784	0.620514	-0.98842	0.117723	-0.523764	0.400925	0.67125	0.396679	-0.132999	0.880177	-0.804249	0.272883	0.566501	0.42522	-0.0663854	0.943806	-0.632886	0.41614	0.218172	0.748008	0.51841	0.366339	0.300237	0.586732	-0.0740798	0.913692	-0.242309	0.752627	-0.16823	0.723158	-0.156835
nicotinate ribonucleoside	0.0792838	0.740697	-0.0358207	0.912315	-0.767104	0.0623731	0.122279	0.595109	-0.374622	0.187365	-0.388482	0.0417377	-1.36187	0.00022707	-0.715312	0.0239273	-0.708756	0.0154672	-1.31887	5.65025e-05	-1.05411	0.000367733	-0.330134	0.206152	-0.0372475	0.894332	0.272707	0.360492	0.309954	0.370558	-0.152352	0.295928	-0.573681	0.0305022	-0.421329	0.135339	0.609306	0.0268516	0.925817	0.000233045	0.316511	0.179707	0.112405	0.621175	0.415055	0.0573047	0.30265	0.151804	-0.241214
nicotinamide	1.13799	0.0218698	0.16704	0.502092	-0.148454	0.27878	0.995784	0.0162864	1.40433e-16	0.46946	1.40433e-16	0.478629	2.86478	1.44601e-05	1.40433e-16	0.386862	-0.148454	0.189348	2.72257	7.95493e-05	-0.16704	0.385685	1.40433e-16	0.415912	-0.356905	0.175296	-0.208451	0.437338	0.148454	0.258881	-1.32786	0.00814839	-1.4949	0.00029051	-0.16704	0.448239	-3.22169	2.18787e-06	-3.22169	1.28178e-07	1.40433e-16	0.435335	-4.21747	7.30986e-06	-4.21747	6.23545e-07	1.40433e-16	0.436077	0.385526
pantoate	-0.123138	0.298025	-0.225513	0.612053	0.108843	0.710539	-0.466175	0.301884	-0.344067	0.236322	-0.532445	0.0557993	-1.20639	3.19705e-05	-1.08398	0.0137194	-1.1411	0.000392386	-1.54943	0.000920667	-1.20254	0.000250218	-1.78239	4.10538e-05	0.460072	0.157321	0.433143	0.0228752	-0.0269286	0.945593	0.357697	0.0974548	0.665123	0.00061137	0.307427	0.157053	0.58248	0.0616281	0.498436	0.0169882	-0.0840446	0.743149	0.704589	0.0781094	0.432166	0.293572	-0.272423	0.287518	-0.0799358
pantothenate (Vitamin B5)	-0.0806666	0.361594	-0.0204176	0.952536	-0.0316525	0.879649	-0.0161155	0.937356	-0.165246	0.0985052	-0.256545	0.0219894	-0.602776	1.84118e-06	-1.09211	0.00131252	-0.945592	4.53333e-05	-0.538225	0.00085053	-1.23694	6.49804e-05	-1.17049	1.64991e-06	0.687525	0.022025	0.812837	2.08836e-05	0.125312	0.658524	0.747774	0.0029788	0.861851	1.5318e-05	0.114077	0.471332	0.198194	0.00120802	0.470021	0.000374952	0.271827	0.0107354	0.0490637	0.709474	0.229591	0.0418786	0.180527	0.0877586	-0.0442455
riboflavin (Vitamin B2)	-0.855831	0.138071	-0.57533	0.0509919	-0.707916	0.180797	-0.046324	0.943001	-0.125981	0.46946	-0.047184	0.41521	-3.07287	1.05603e-05	-3.20972	6.50508e-06	-3.28362	2.46926e-05	-2.26337	0.000897977	-2.76037	1.50542e-06	-2.62289	4.76025e-06	0.0754022	0.795382	0.0216389	0.95533	-0.0537633	0.90634	0.355903	0.42522	0.169554	0.727504	-0.18635	0.534783	-0.0614456	0.791402	-0.189108	0.320384	-0.127663	0.412447	-0.141103	0.610094	-0.189968	0.437448	-0.0488653	0.436077	-0.713026
hydroxymethylpyrimidine	-0.308493	0.477247	-0.388216	0.720186	0.508786	0.452977	-0.0321003	0.985097	-0.126191	0.438199	0.301685	0.847428	0.00380333	0.994745	0.780249	0.255954	0.980675	0.233384	0.280196	0.698302	1.04227	0.0397334	0.773575	0.415912	1.27852	0.117987	0.971253	0.0401437	-0.307267	0.727102	1.1988	0.0520687	1.78853	0.00277633	0.589736	0.366181	2.05497	0.0138244	1.94813	0.0651056	-0.10684	0.886758	1.96087	0.0331977	2.28191	0.067499	0.321036	0.714527	-0.0626411
5-(2-Hydroxyethyl)-4-methylthiazole	-0.305227	0.504259	-0.766764	0.502092	0.29314	0.760794	-0.134772	0.953306	-0.717231	0.0204107	-0.0240866	0.992123	-0.112461	0.892543	0.690576	0.346178	0.894882	0.308761	0.0579932	0.94955	0.740109	0.148712	0.577655	0.635081	1.35063	0.122	1.12964	0.0279867	-0.220983	0.817353	0.889091	0.123792	1.72801	0.00886446	0.838922	0.250535	2.15366	0.0297053	2.13699	0.0774083	-0.0166764	0.983672	1.57121	0.0768399	2.24767	0.115367	0.676468	0.547352	-0.259617
pyridoxal	-0.321406	0.248489	-0.0993728	0.749205	-0.262297	0.515224	-0.113387	0.615457	0.222826	0.435766	-0.0619658	0.823688	-0.156682	0.187227	-0.703288	0.0062519	-0.0730626	0.755858	0.0513372	0.873467	-0.38109	0.148712	0.127268	0.648628	0.235572	0.149978	-0.0632152	0.79175	-0.298788	0.268534	0.457606	0.156089	-0.00410554	0.988962	-0.461711	0.174084	-0.311034	0.138314	0.0204039	0.874346	0.331438	0.149328	0.0251788	0.917684	0.0718255	0.81216	0.0466467	0.820588	-0.227692
pyridoxine (Vitamin B6)	0.0619227	0.447294	0.015787	0.946069	-0.0895099	0.540041	-0.00791213	0.923317	-0.0561173	0.330964	-0.0757502	0.111369	0.00380892	0.951855	-0.232113	0.0528426	-0.0490609	0.56227	-0.0660259	0.142823	-0.304018	0.0625509	-0.0353012	0.656683	0.263179	0.0560987	0.108484	0.266554	-0.154695	0.32904	0.217043	0.203588	-0.0429483	0.595276	-0.259992	0.147409	0.0272566	0.512603	0.0556145	0.168151	0.0283579	0.503591	-0.0209486	0.658836	-0.0122236	0.811267	0.00872501	0.84708	-0.00393336
phosphate	0.0659529	0.526061	0.0307427	0.872579	-0.054186	0.643844	-0.00572941	0.971524	-0.0684001	0.356415	-0.0503074	0.41521	0.0645552	0.383154	-0.183518	0.0826991	-0.0301021	0.699105	-0.00712711	0.94955	-0.282661	0.0232766	-0.0262235	0.656683	0.296286	0.0232192	0.166703	0.096732	-0.129583	0.331198	0.261076	0.0874566	0.046564	0.564325	-0.214512	0.0896235	0.0482124	0.521901	0.0720456	0.202798	0.0238333	0.693146	-0.0144584	0.755875	0.0274676	0.697459	0.041926	0.436077	0.0141699
fumarate	0.211843	0.0609652	0.396337	0.146397	0.202603	0.606447	0.143686	0.313233	0.0348856	0.890314	-0.49448	0.0296664	-1.70566	3.43223e-08	-1.5297	0.000202759	0.278412	0.308761	-1.77381	2.31589e-06	-1.89115	1.49565e-05	-0.418671	0.0546154	0.575945	0.0148158	0.266668	0.240218	-0.309277	0.335125	0.76044	0.0031129	0.257428	0.213775	-0.503011	0.0488341	0.751908	0.00195713	2.25074	1.33638e-06	1.49883	0.000253189	0.643107	0.0063992	1.61257	2.81954e-06	0.969465	0.000755268	0.270261
aconitate [cis or trans]	0.855913	0.294664	2.28655	0.031387	-0.311582	0.565234	0.949538	0.0039114	0.494851	0.00595768	0.157055	0.805594	-3.38838	1.79095e-06	-3.87841	6.20379e-05	-3.46003	0.000366454	-3.29476	0.000644326	-5.67011	2.56782e-05	-2.99139	3.10583e-07	0.795888	0.149396	1.29185	0.0121767	0.495963	0.459279	2.22653	0.0385081	0.124355	0.867747	-2.10217	0.00784299	0.305859	0.118284	1.2202	0.0265202	0.914342	0.0845836	-0.148827	0.486023	0.427718	0.0387189	0.576546	0.00428547	0.943628
alpha-ketoglutarate	0.229143	0.0974805	0.456074	0.304588	0.0774153	0.845452	1.9153	7.52896e-05	1.84131	3.27262e-06	1.6116	6.71784e-05	-0.94373	6.01753e-05	-1.12253	0.00021604	-1.02316	0.000251838	0.742426	0.00773784	0.262707	0.394966	0.511024	0.0482718	0.17936	0.392487	0.415368	0.0419778	0.236008	0.375467	0.40629	0.238848	0.26364	0.10985	-0.142651	0.709549	0.000557186	0.993228	0.335941	0.00242549	0.335384	0.000210095	-0.0734288	0.790176	0.0322372	0.925713	0.105666	0.65328	0.254211
succinate	0.204558	0.477247	0.064475	0.86206	-0.0398531	0.900728	1.1545	9.26451e-06	1.1773	7.55035e-07	0.858369	2.46159e-05	1.19261	0.000465949	0.902263	0.00380359	1.06435	0.000282043	2.14255	8.8496e-07	2.01508	1.50542e-06	1.96257	7.22128e-08	0.242937	0.430932	0.564199	0.0491902	0.321262	0.331198	0.102854	0.482585	0.319788	0.012383	0.216934	0.131613	-0.0474057	0.536914	0.435939	0.000233045	0.483345	0.000534866	-0.024608	0.792687	0.13981	0.210787	0.164418	0.0280099	0.0763933
malate	0.115107	0.477247	-0.196219	0.188533	-0.237171	0.309174	0.842228	0.0020244	0.377093	0.00444436	-0.441055	0.0296664	-0.542139	0.0101047	-0.573049	0.00114811	0.67952	0.0127087	0.184983	0.222321	0.000263138	0.997062	0.475636	0.00120517	0.42737	0.0176784	0.707928	0.00377458	0.280558	0.211404	0.116044	0.325541	0.355651	0.0217722	0.239607	0.0629147	0.39646	0.0333154	1.92959	1.32328e-05	1.53313	6.85073e-05	-0.0686754	0.614164	0.646304	0.000300444	0.714979	0.000291792	-0.106094
citrate	1.23663	0.192414	2.46979	0.0329332	-0.231859	0.779625	1.42929	0.0164539	0.941183	0.00225081	0.000309296	0.999418	-4.66962	1.52869e-05	-5.21977	5.09865e-05	-4.53479	0.000162984	-4.47696	0.000214431	-6.74838	9.2448e-06	-4.30262	6.27117e-07	1.03369	0.159823	1.50292	0.0272172	0.469231	0.594861	2.26686	0.041161	0.0344402	0.963275	-2.23242	0.00463713	0.483546	0.272457	1.63775	0.0145218	1.15421	0.0368837	-0.00455842	0.988078	0.208776	0.568632	0.213334	0.454002	1.15819
isocitric lactone	0.152896	0.443754	0.806516	0.378121	-0.463564	0.25383	0	NA	0	NA	0	NA	0	NA	-1.10071	0.0304765	-1.13694	0.00115958	-0.152896	0.348447	-1.90723	0.00576384	-0.673374	0.0121883	1.10071	0.0448347	1.13694	0.00101179	0.0362269	0.951421	1.75433	0.0205255	0.520478	0.0754644	-1.23385	0.0645776	0	NA	0	NA	0	NA	0	NA	0	NA	0	NA	0.165283
isocitrate	2.21244	0.0750613	3.93958	0.00969538	0.953652	0.0517268	0.312359	0.492124	0.121221	0.46946	0.0569739	0.478629	-2.50598	1.47783e-06	-3.47452	2.02268e-05	-2.91576	5.21586e-05	-4.40606	0.00206272	-7.29287	7.26672e-05	-3.81243	8.89509e-09	0.968539	0.0352948	0.409777	0.32399	-0.558761	0.331198	2.69568	0.0874415	-0.849007	0.39903	-3.54469	0.0047955	5.61733e-16	0.409898	5.61733e-16	0.409325	5.61733e-16	0.435335	-0.191138	0.619	-0.255385	0.437448	-0.0642469	0.706835	2.36855
citraconate/glutaconate	3.79546	6.70704e-06	3.53084	0.000497683	3.13287	2.36468e-05	3.84755	1.72411e-06	3.85883	5.65657e-07	4.31668	4.57641e-09	0.17638	0.479497	-0.517852	0.185968	-0.716689	0.0276983	0.228479	0.405935	-0.189867	0.526202	0.467119	0.00257387	0.753456	0.0888158	0.816484	0.020369	0.0630277	0.90634	0.488844	0.238848	0.153894	0.564325	-0.334949	0.326812	0.0592234	0.822109	-0.0765861	0.750143	-0.13581	0.451214	0.0704986	0.709474	0.392535	0.0014021	0.322036	0.077905	3.48639
malonate	0.400339	0.0388513	0.491944	0.107763	0.0428329	0.879487	0.100157	0.624393	0.184216	0.177396	0.141682	0.293782	-0.833895	0.00110659	-1.39939	7.40557e-05	-1.1808	3.43547e-05	-1.13408	4.02676e-05	-1.70712	4.03826e-05	-1.08195	2.73858e-05	0.672965	0.00928592	0.868476	0.000324039	0.195511	0.401886	0.764571	0.010215	0.510971	0.00501844	-0.2536	0.218171	0.107467	0.491182	0.521572	0.00789342	0.414105	0.00208547	0.191526	0.207549	0.563097	0.00128969	0.371571	0.0274021	0.311705
tetradecanedioate (C14)	-0.530665	0.338978	0.0467612	0.943058	0.153524	0.856912	-0.00905682	0.985097	0.149183	0.785928	-0.863752	0.125462	0.104143	0.812842	0.403307	0.386862	0.373883	0.308761	0.625751	0.186358	0.505728	0.265335	-0.643393	0.262468	-0.363504	0.455037	0.298308	0.44177	0.661812	0.19762	0.213922	0.58133	0.982497	0.0608604	0.768575	0.147409	-0.0643402	0.869958	0.568048	0.202798	0.632388	0.159013	0.0938993	0.863083	-0.286647	0.611911	-0.380547	0.483699	-0.110127
2-hydroxyglutarate	1.02886	0.00278193	0.0231788	0.961005	0.446982	0.172301	3.14186	3.26946e-08	2.13028	1.81643e-05	1.54422	0.000133697	-1.72783	2.30521e-05	-1.35537	0.00223316	-0.804002	0.0188869	0.385171	0.0189882	0.751728	0.0245116	0.293233	0.0621427	0.782845	0.0497987	0.766824	0.0259194	-0.0160212	0.975115	-0.222835	0.42522	0.184947	0.163758	0.407782	0.147409	1.1553	0.000154232	1.69065	8.65171e-06	0.535347	0.0288797	0.143722	0.465792	0.0930087	0.568632	-0.0507131	0.800027	0.499674
glutarate (C5-DC)	1.43207	0.00686103	0.955791	0.126861	0.472731	0.0968672	1.75742	0.0254984	1.56064	0.00786917	0.170119	0.526013	-2.33064	0.0029086	-3.30797	0.000304758	-1.82405	0.000291782	-2.00528	0.000576034	-2.70312	7.7658e-05	-2.12666	5.92402e-07	1.23125	0.0451922	1.50556	0.00261543	0.274309	0.597014	0.754973	0.0494513	0.546221	0.0119895	-0.208751	0.465314	0.253921	0.670654	2.01215	0.00334187	1.75822	0.00260528	0.0571345	0.894689	0.42484	0.275665	0.367705	0.208996	0.953531
2-hydroxyadipate	2.8972	0.000148409	1.54261	0.123251	2.12147	0.0120633	1.38414	0.0362743	1.41532	0.0162845	1.63219	0.0582518	-0.0471072	0.383154	-1.16908	0.0528426	-0.392319	0.580388	-1.56017	0.0312094	-1.29637	0.0790277	-0.881602	0.162929	1.26936	0.0463083	0.832981	0.122395	-0.436378	0.597014	-0.0852299	0.905736	0.0572552	0.922364	0.142485	0.846578	0.147388	0.409898	0.487769	0.334415	0.340382	0.53481	0.178568	0.795543	0.735821	0.389212	0.557253	0.436077	2.18709
arabitol/xylitol	0.3202	0.477247	0.423811	0.378121	0.3658	0.540041	0.435279	0.000142913	0.405573	0.00184753	0.411621	0.000658996	-0.813054	0.0145708	-1.91778	2.92253e-05	-0.538006	0.189348	-0.697975	0.0088173	-1.93602	0.000367733	-0.492185	0.0283755	1.04347	0.0153037	-0.232809	0.630235	-1.27628	0.0339378	1.14708	0.0243087	-0.187209	0.524332	-1.33429	0.0077459	-0.0612546	0.40375	0.0422394	0.497559	0.103494	0.188878	-0.0909609	0.380302	0.0185812	0.824099	0.109542	0.25977	0.369937
3,4-dihydroxybutyrate	-0.176616	0.477247	0.00676876	0.985093	0	NA	-0.240714	0.875781	-0.83888	0.29868	0.0206902	0.992123	0.593836	0.383154	2.32997	0.000497237	0.507564	0.412538	0.529738	0.405935	1.48433	0.0403766	0.528254	0.415912	0.0682739	0.849036	-0.176616	0.412538	-0.24489	0.459279	0.251658	0.42522	0	NA	-0.251658	0.448239	1.80441	0.0297053	-0.262888	0.75257	-2.0673	0.0163674	1.20625	0.27652	-0.00148395	0.999028	-1.20773	0.245087	-0.0566157
tyrosine	1.33992	0.0218698	0.503141	0.0737666	1.81322	0.0114901	0.260515	0.000475207	0.291066	0.0559975	0.213808	0.00689588	1.0687	0.0288634	0.0417907	0.799522	1.43293	0.0127126	-0.0107046	0.880131	-0.170284	0.312151	-0.166486	0.0807389	0.952987	0.0631191	-0.429257	0.500333	-1.38224	0.0390932	0.116205	0.452279	0.0440423	0.656471	-0.0721629	0.703731	-0.073925	0.436081	-0.0650318	0.202798	0.00889318	0.927108	-0.0433743	0.656005	-0.111739	0.0550014	-0.0683645	0.482545	1.21876
2R,3R-dihydroxybutyrate	0.681417	0.0229991	0.486997	0.0587916	0.570598	0.0603506	1.14742	0.00253538	1.26398	0.000251185	1.25169	0.00168239	-1.95863	0.000194575	-2.53018	7.41555e-06	-2.22213	6.94155e-05	-1.49263	3.05314e-06	-1.7532	4.29554e-05	-1.54103	3.91877e-05	0.807497	0.0153541	1.30197	0.00113841	0.494476	0.103542	0.613076	0.00491076	1.19115	4.4299e-05	0.578077	0.0100445	0.235948	0.395499	1.03848	0.00722544	0.802532	0.00745151	0.352499	0.144416	1.14275	0.000155162	0.790251	0.0111578	0.579671
3-hydroxyhexanoate	-0.436078	0.353593	-0.925635	0.251232	-1.18634	0.0281623	0	NA	0	NA	0	NA	-0.598919	0.0901675	-1.28682	0.016745	-1.91586	4.70845e-05	-0.162841	0.305927	-0.36119	0.385685	-0.729522	0.0392948	0.687905	0.249831	1.31694	0.00799725	0.629037	0.299836	0.198348	0.673487	0.566681	0.127131	0.368333	0.528064	0	NA	0	NA	0	NA	0	NA	0	NA	0	NA	-0.849351
glycerol	0.826363	0.00357202	0.488309	0.277732	0.734507	0.0575797	0.346576	0.000301481	0.311472	0.00999305	0.203631	0.0577689	1.5687	6.80303e-07	1.50277	0.000712589	1.83534	2.77967e-05	1.08891	0.000147734	1.32593	0.000413044	1.30447	0.00034371	0.120295	0.690271	-0.137553	0.525177	-0.257848	0.498032	-0.217759	0.425776	-0.229409	0.416357	-0.0116504	0.975653	0.0543694	0.505456	0.129093	0.0268094	0.0747238	0.439415	0.0192661	0.755875	-0.0138516	0.900371	-0.0331176	0.706835	0.68306
glycerol 3-phosphate	0.408985	0.560876	0.307283	0.416349	0.496468	0.286492	0.410886	0.061967	0.381799	0.0651408	0.507335	0.0420108	-1.04975	0.0439758	-1.17133	0.000920447	-0.469458	0.172241	-1.04785	0.0390444	-1.09681	0.00136452	-0.458591	0.112064	0.209547	0.690271	0.0219031	0.962045	-0.187644	0.658524	0.107846	0.812057	0.109387	0.850331	0.00154104	0.995023	0.0879677	0.126734	0.602195	0.00257451	0.514227	0.0112056	0.0588807	0.820365	0.698644	0.0121277	0.639763	0.022376	0.404245
glycerophosphoglycerol	1.42772	0.0186313	1.11503	0.0993844	0.626695	0.21385	4.213e-16	0.492124	0.0601	0.46946	0.74539	0.0357821	-0.507631	0.065051	-1.90336	0.00038556	-2.27469	0.000518688	-1.93535	0.000537752	-2.95829	0.000111572	-2.15599	4.10538e-05	1.39573	0.0111475	2.31531	0.000656885	0.919582	0.122281	1.08304	0.0874566	1.51429	0.00270349	0.431248	0.360561	4.213e-16	0.409898	0.548252	0.0106211	0.548252	0.0147684	0.0601	0.465792	1.29364	0.000469097	1.23354	0.00245107	1.05648
myo-inositol	0.106059	0.73337	-0.0711477	0.816032	0.0476214	0.841544	0.0419296	0.556641	-0.0364981	0.598344	-0.00377798	0.985415	0.391225	0.0835366	-0.228341	0.132008	0.154833	0.211063	0.327095	0.0848174	-0.193691	0.270999	0.103434	0.279475	0.678331	0.0288543	0.316725	0.184778	-0.361606	0.106126	0.501124	0.0722081	0.258288	0.151773	-0.242837	0.211951	0.0587656	0.315637	0.0803336	0.185076	0.021568	0.734358	-0.0196621	0.792687	0.034626	0.716709	0.0542881	0.504463	0.027511
3-hydroxybutyrate (BHBA)	0.0224557	0.934969	-0.0224861	0.961005	-0.188231	0.266649	0.242368	0.269107	0.764103	0.0139678	0.477456	0.0884973	-1.60206	2.67262e-05	-2.02416	0.000165046	-0.649354	0.00334111	-1.38215	0.000147734	-1.23757	0.010146	0.0163342	0.937715	0.894615	0.0195671	0.791829	0.00424392	-0.102785	0.729671	0.849673	0.0655857	0.581142	0.00270349	-0.268531	0.486967	0.472523	0.0242062	1.74454	8.70728e-07	1.27202	0.000388887	0.994257	0.00495964	1.97963	8.672e-05	0.985372	0.00834978	-0.0627539
heptanoate (7:0)	0.901414	0.238611	-0.188637	0.872579	0.0603987	0.966464	0.548434	0.530975	-0.243575	0.753999	-0.324902	0.719045	0.680535	0.332334	0.825645	0.176371	0.41522	0.585552	0.327555	0.624318	0.770707	0.385685	0.0299192	0.966536	0.705459	0.328861	0.400729	0.550101	-0.30473	0.729671	-0.384593	0.623408	-0.440287	0.560873	-0.0556943	0.956956	0.850569	0.211076	0.135414	0.858048	-0.715155	0.27019	0.0585595	0.944195	-0.737923	0.364475	-0.796482	0.391954	0.257725
caproate (6:0)	-0.53231	0.44031	-0.472841	0.362707	-0.118049	0.82284	-0.439362	0.574839	-0.259418	0.381251	-0.861839	0.00129736	0.303271	0.658339	-0.349942	0.316334	0.789503	0.0286262	0.396218	0.305927	-0.136519	0.625868	0.0457129	0.747946	0.984428	0.0718593	0.669859	0.169999	-0.314569	0.498989	1.0439	0.0504799	1.08412	0.00899755	0.0402228	0.904391	0.331215	0.61065	1.15609	0.0881897	0.824875	0.00710605	0.51116	0.0378369	0.733614	0.00155127	0.222455	0.276531	-0.3744
caprylate (8:0)	0.239133	0.779754	-0.399558	0.640462	-0.403669	0.594206	1.0898	0.132646	-0.310075	0.753196	-0.261618	0.802279	-0.379906	0.589408	0.220772	0.754953	0.500104	0.178776	0.470766	0.405935	0.310256	0.649561	0.642154	0.458133	0.451448	0.499134	0.694311	0.225114	0.242863	0.675228	-0.187244	0.805196	0.0515087	0.960562	0.238752	0.769783	1.05213	0.272457	1.57432	0.0262378	0.522195	0.45316	-0.347753	0.599538	0.222897	0.811267	0.570651	0.541235	-0.188031
mevalonate	-0.510757	0.0039792	-0.45249	0.0239452	-0.629559	0.00232492	-0.355126	0.0401952	-0.270855	0.226006	-0.107021	0.542601	-1.4605	6.0474e-06	-1.10343	7.76414e-05	-0.830972	0.000157556	-1.30487	4.92003e-06	-0.921795	0.000677725	-0.308434	0.0652471	0.138	0.40605	0.376359	0.0160994	0.238359	0.18885	0.196267	0.0494513	0.257557	0.0237966	0.0612901	0.550267	0.495074	0.00348738	1.00589	2.41797e-05	0.510817	0.00161568	0.579345	0.0273572	1.254	7.14182e-05	0.67465	0.0180611	-0.530935
mevalonolactone	-0.481071	0.00978465	-0.284244	0.231254	-0.669452	0.00711058	-0.380656	0.244505	-0.308307	0.385449	-0.11433	0.700797	-1.35809	6.17541e-05	-0.772261	0.000488877	-0.769248	0.00289274	-1.25767	0.000338966	-0.796324	0.0245116	-0.214126	0.350494	0.106412	0.466746	0.402833	0.0165059	0.296421	0.1407	0.303239	0.122675	0.214453	0.158679	-0.0887864	0.663559	0.692237	0.00502051	0.991671	0.00123337	0.299434	0.100166	0.764585	0.076133	1.258	0.0014021	0.493412	0.218005	-0.478256
3-hydroxy-3-methylglutarate	0.0872735	0.477247	0.0352629	0.943058	-0.310877	0.180461	-0.591136	0.00163979	-0.274921	0.275162	-0.110406	0.547199	-0.768332	1.0104e-05	-1.29224	0.00145384	-0.437332	0.0253376	-1.44674	7.72145e-06	-1.60242	0.000492987	-0.236861	0.190671	1.96256	0.000294548	2.36063	1.66578e-07	0.398077	0.211404	1.91055	0.000379295	1.96248	4.56027e-06	0.051937	0.875027	1.43865	3.38489e-05	2.69163	2.95275e-07	1.25298	0.000290536	1.75487	7.55195e-05	3.17236	1.36155e-07	1.4175	0.00030479	-0.0627802
butyrate/isobutyrate (4:0)	-0.335358	0.0568217	-0.537059	0.227464	-0.496212	0.0118663	0.100633	0.663349	-0.277654	0.222812	-0.592239	0.0121733	-2.58849	1.01701e-06	-2.15703	0.000142854	-2.297	1.4464e-06	-2.1525	2.31589e-06	-1.89763	0.000106524	-2.39302	1.38376e-06	0.601722	0.0885249	1.18315	9.04606e-05	0.581425	0.113495	0.400021	0.0974548	1.02229	4.05262e-06	0.622272	0.0216997	1.03317	0.000207429	1.47463	9.86067e-06	0.44146	0.0130397	0.654888	0.0265166	0.781763	0.00461003	0.126875	0.565804	-0.456209
methylphosphate	0.218234	0.740697	-0.132513	0.896779	0.00220207	0.998	-0.0737953	0.958597	-0.470721	0.407041	-0.440473	0.395772	-0.110411	0.834954	-0.457561	0.386862	-0.0332504	0.960525	-0.40244	0.500185	-0.795769	0.243777	-0.475925	0.430607	0.43545	0.455037	0.115794	0.866237	-0.319656	0.659305	0.084703	0.905736	-0.100238	0.890068	-0.184941	0.841855	0.0882995	0.851463	0.192954	0.631484	0.104655	0.808937	-0.308627	0.633247	-0.173723	0.828454	0.134904	0.767582	0.0293078
inosine	-0.232445	0.703942	-1.36783	0.180041	-0.286321	0.809265	-0.0699053	0.492124	0	NA	-0.480225	0.158076	-0.852528	0.0318778	-3.50961	1.4899e-05	-2.80271	0.00361848	-0.689988	0.0942991	-2.14177	0.0146371	-2.99662	3.95131e-06	2.58717	0.00117886	2.44393	0.00804416	-0.143246	0.872629	1.45179	0.122501	2.39005	0.000442547	0.938267	0.26266	-0.0699053	0.409898	0.493743	0.121483	0.563648	0.0886595	0	NA	0.083423	0.2735	0.083423	0.279082	-0.628867
xanthine	0.429456	0.282073	-0.670312	0.439957	0.203754	0.31775	-0.313165	0.416205	-0.740418	0.081353	-0.53976	0.0447311	-2.15262	6.17541e-05	-1.61376	0.00514205	-1.26539	0.000109305	-2.89524	1.21331e-05	-1.68386	0.0178847	-2.0089	1.38978e-05	3.09979	0.00037649	3.87981	2.45861e-06	0.78002	0.111992	2.00002	0.0164026	3.65411	1.93948e-07	1.65409	0.0180736	3.63865	1.76108e-05	4.76703	2.40638e-08	1.12839	0.00331157	3.21139	7.14971e-05	4.54044	1.04727e-06	1.32905	0.0048233	-0.0123676
hypoxanthine	0.744705	0.183672	-0.592025	0.522578	0.0789805	0.887605	-2.80867e-16	0.492124	0.0546219	0.947282	0.159491	0.478629	-0.270686	0.192087	-3.3903	0.000739693	-2.71977	2.78418e-05	-1.01539	0.0274632	-2.74365	0.00167017	-2.63926	1.38376e-06	4.20321	0.000360479	4.87563	2.14238e-06	0.672425	0.335125	2.86648	0.00540718	4.20991	5.46029e-06	1.34343	0.0345309	1.0836	0.0230042	2.42655	8.5026e-08	1.34296	0.00856693	1.13822	0.0157504	2.58604	5.60416e-07	1.44783	0.00643307	0.0772204
1-methyladenosine	0.0947003	0.77904	-0.252078	0.88918	-2.21032	0.179692	-0.3142	0.492124	-0.108639	0.781433	0.30129	0.564447	-3.33958	9.53101e-05	-2.76169	0.0167495	-2.32413	0.0864402	-3.74848	7.4412e-09	-2.61825	0.014188	0.187476	0.715498	-0.660275	0.495428	-1.26007	0.346794	-0.599794	0.738668	-1.00705	0.295928	-3.56508	6.59227e-07	-2.55803	0.0216997	-0.0823842	0.854668	-0.244615	0.527616	-0.162231	0.600707	0.123177	0.465792	0.370875	0.437448	0.247697	0.620219	-0.789231
2'-deoxyadenosine	-0.0402738	0.827049	-0.179466	0.592759	-0.319565	0.098003	-0.304626	0.100883	-0.20718	0.0736397	-0.206773	0.107704	-1.18718	4.08802e-05	-1.07175	0.000205131	-1.19385	2.82146e-05	-1.45154	1.6552e-05	-1.09946	0.00102211	-1.08106	3.58666e-05	0.115639	0.57343	0.412718	0.0279867	0.297079	0.182632	-0.0235531	0.906642	0.133427	0.32603	0.15698	0.531258	0.231074	0.00879552	0.406049	0.0024637	0.174975	0.0886595	0.328519	0.104854	0.503902	0.00933358	0.175383	0.196048	-0.179769
AMP	-0.188731	0.819289	-0.332863	0.502092	-0.0725332	0.896235	-0.403634	0.112088	-0.493049	0.132212	-1.34288	0.0108421	-1.42135	0.0210445	-1.78678	0.0018417	-0.100669	0.755858	-1.63625	0.00709326	-1.94697	6.33478e-05	-1.37101	0.004007	1.67803	0.031907	2.51186	0.00158731	0.833828	0.126366	1.53389	0.0141039	2.62805	0.000302596	1.09416	0.000282498	1.31259	0.000127031	3.83253	2.54959e-07	2.51994	3.4076e-05	1.22318	0.00626681	2.89329	8.69131e-05	1.67011	0.00639478	-0.198042
1-methyladenine	0.748363	0.488897	-0.107694	0.863557	0.0386806	0.918636	0.793948	0.158093	-1.75113	0.052305	-0.85749	0.0003547	-1.21183	0.113638	-1.15569	0.0242993	-0.698592	0.000783346	-1.16624	0.171139	-2.79913	0.00339692	-1.59476	0.000101562	2.96589	0.00684272	3.70881	0.000656885	0.742921	0.0921251	2.10983	0.0241455	2.99913	0.00128006	0.889296	0.0376625	3.02203	3.97475e-05	4.22205	5.48796e-10	1.20002	0.00542686	0.476953	0.604333	2.57061	0.000412723	2.09366	0.0173127	0.22645
N6-methyladenosine	0.00641663	0.987522	-0.249044	0.67318	0.213077	0.763742	-0.114406	0.492124	-0.217032	0.553586	-0.389449	0.0629457	-2.19272	0.00133254	-2.41426	0.00060009	-1.4453	0.009802	-2.31354	4.0215e-06	-2.38225	0.000131121	-2.04783	1.81856e-06	3.4028	0.00115681	4.09952	0.000166764	0.696715	0.315913	3.14734	0.000127253	4.30618	8.58899e-08	1.15884	0.00315229	3.18126	1.46423e-05	4.84694	1.34212e-08	1.66568	0.000325625	3.07864	1.92371e-05	4.5719	3.63738e-08	1.49326	0.00129949	-0.00985025
7-methylguanine	-0.622678	0.066556	-0.934663	0.0365563	-0.723343	0.0234894	-0.20971	0.0857707	-0.310095	0.052217	-0.257184	0.0670872	1.02911	0.000265471	1.00404	0.00438746	0.883217	0.00383108	1.44208	0.000217146	1.62861	8.48971e-05	1.34938	4.54088e-06	0.785214	0.036192	1.60352	0.000292417	0.818307	0.0604926	0.473229	0.133132	1.50286	0.000114308	1.02963	0.00106334	0.760142	5.1923e-05	1.45762	4.93709e-07	0.69748	0.000227502	0.659757	0.00321741	1.41015	6.03991e-06	0.750392	0.00215829	-0.760228
guanosine	0.0573517	0.703942	-0.799452	0.0723887	-0.443002	0.383541	-0.150053	0.399752	-0.239001	0.578504	-0.0902352	0.831858	-2.05843	1.38039e-06	-3.66996	2.74578e-05	-3.2442	0.000113632	-2.26584	2.03056e-07	-3.10951	2.75477e-05	-2.89143	2.18743e-06	2.23374	0.000162115	2.54753	0.000194494	0.31379	0.557361	1.37693	0.00253891	2.04717	4.39291e-07	0.67024	0.0231964	0.622204	0.0947719	1.36176	0.000491565	0.739553	0.074897	0.533255	0.0781094	1.42157	0.000164821	0.888319	0.0280099	-0.395034
cytidine 2' or 3'-monophosphate (2' or 3'-CMP)	0.053833	0.934084	0.0461865	0.918683	-0.483607	0.540041	0.133853	0.849296	0.216533	0.46946	-0.153908	0.411384	0.0881078	0.834954	0.827818	0.0149188	0.00180529	0.996154	0.168128	0.698302	0.998165	0.00903346	0.331504	0.429318	-0.522564	0.262581	0.389329	0.506242	0.911893	0.113495	-0.53021	0.184176	-0.148111	0.776282	0.382099	0.45709	0.217147	0.457564	0.303026	0.207808	0.0858799	0.710129	0.299826	0.482224	0.0152649	0.971525	-0.284561	0.237007	-0.127863
threonine	2.98138	0.125338	0.887214	0.0723887	2.50127	0.0144855	1.84361	9.26451e-06	2.13661	4.293e-05	2.14303	0.000130841	1.13146	0.420391	-2.08659	0.000483016	0.304026	0.686957	-0.0063118	0.98667	-0.837197	0.00481393	-0.0542124	0.702393	2.94159	0.0862971	0.542685	0.750317	-2.3989	0.0229178	0.847424	0.0459371	0.0625783	0.858383	-0.784846	0.0170766	-0.276466	0.37841	-0.28475	0.383639	-0.00828403	0.983672	0.0165394	0.730587	0.0146777	0.811267	-0.00186168	0.963794	2.12329
fructose	-0.164932	0.934084	1.06901	0.439957	0.59365	0.680524	0.331028	0.492124	-0.00902414	0.980204	-0.250943	0.478629	-1.91154	0.0869556	-3.21582	0.00326601	-0.32428	0.671774	-1.41558	0.272536	-4.29386	0.000433688	-1.16887	0.10353	1.46643	0.283501	-1.33632	0.296573	-2.80275	0.0441897	2.70038	0.0862846	-0.577735	0.67329	-3.27812	0.0113274	0.162156	0.409898	0.250943	0.409325	0.0887868	0.808937	-0.177896	0.724372	-0.331028	0.437448	-0.153132	0.436077	0.499244
cytosine	-0.310967	0.0946366	-0.432724	0.460722	0.12441	0.788617	-0.162437	0.663349	-0.348136	0.26727	-0.381112	0.0445275	-2.02538	5.27107e-05	-2.34108	0.00114091	-1.99473	8.20156e-05	-1.87685	1.78972e-05	-2.2565	4.14222e-06	-2.50025	2.14363e-06	1.93014	0.003375	2.75913	1.55114e-05	0.828993	0.164666	1.80838	8.98146e-05	3.19451	1.00367e-07	1.38613	0.000124163	1.61443	0.00193934	2.78979	2.69496e-06	1.17535	0.00147302	1.42874	0.000409638	2.57111	6.61399e-06	1.14238	0.000743575	-0.206427
dihydroorotate	-0.0271465	0.97466	1.40433e-16	0.502092	1.40433e-16	0.540041	-0.980827	0.00670149	-0.493295	0.33524	1.40433e-16	0.478629	1.76744	0.0284332	2.04206	0.000306341	1.40433e-16	0.412538	0.813757	0.168072	1.54876	0.00021735	1.40433e-16	0.415912	-0.891679	0.211358	-0.891679	0.196392	1.40433e-16	0.459279	-0.864532	0.122675	-0.864532	0.0971067	1.40433e-16	0.448239	-0.617061	0.151989	-2.65912	2.2619e-07	-2.04206	0.000430321	-0.12953	0.709474	-1.67829	4.09427e-05	-1.54876	0.000743575	-0.00904884
orotate	-0.303323	0.0812476	-0.781832	0.108855	-0.315602	0.0286617	-1.1027	0.000301481	-1.08782	7.55035e-07	-1.20996	8.91302e-05	-1.17291	8.14636e-05	-0.845892	0.0220478	-1.06328	1.4464e-06	-1.97229	2.31589e-06	-1.15188	0.000471633	-1.95763	3.40043e-06	-0.354837	0.328861	0.200536	0.120781	0.555373	0.152255	-0.833345	0.00846447	0.188257	0.137924	1.0216	0.00196016	-0.0278159	0.815991	0.310169	0.0265921	0.337985	0.000737626	-0.0129294	0.919914	0.202914	0.330652	0.215843	0.220647	-0.466919
thymidine	-0.153221	0.466576	-0.240636	0.303543	-0.377622	0.0651777	-0.0898696	0.682619	-0.139187	0.59608	-0.437932	0.0238785	-1.44451	2.90939e-05	-1.38132	0.000372764	-1.32347	1.62817e-06	-1.38116	3.15267e-05	-1.27988	0.000100129	-1.38378	9.23102e-05	0.364179	0.0948469	0.771828	0.000112199	0.407648	0.0827491	0.276764	0.0874566	0.547427	0.0145393	0.270663	0.118553	0.427367	0.0952172	0.89287	0.000293494	0.465503	0.0252451	0.378049	0.114357	0.544807	0.0114682	0.166758	0.454002	-0.25716
thymine	-0.0430699	0.712524	-0.270575	0.433668	-0.151518	0.177252	0.039516	0.663349	-0.25953	0.222812	-0.530636	0.000152035	-1.45429	1.75402e-06	-1.69306	0.000230503	-1.06636	1.49335e-06	-1.37171	8.89932e-08	-1.68202	2.75477e-05	-1.44548	6.27117e-07	0.912652	0.00724717	1.15333	5.06569e-06	0.240676	0.362087	0.685147	0.00369871	1.04488	2.27665e-06	0.359732	0.0491844	0.673881	0.00210843	1.54126	2.2619e-07	0.867377	0.000430321	0.374835	0.0265166	0.971105	5.60416e-07	0.59627	0.00262957	-0.155055
5-methyluridine (ribothymidine)	0.136901	0.658947	-0.148442	0.618495	-0.480425	0.1126	2.80867e-16	0.492124	2.80867e-16	0.46946	-0.0740318	0.478629	-0.360967	0.00803465	-1.97519	8.47921e-06	-1.51013	0.000216917	-0.497868	0.0634491	-1.82675	2.3811e-05	-1.10374	4.54088e-06	1.61423	0.000150215	1.2232	0.000735351	-0.39103	0.209815	1.32888	0.00522836	0.605869	0.0318662	-0.723013	0.00888074	2.80867e-16	0.409898	0.0740318	0.409325	0.0740318	0.435335	2.80867e-16	0.465792	2.80867e-16	0.437448	2.80867e-16	0.436077	-0.163988
uracil	-0.464242	0.252243	-1.34052	0.188533	-0.0116719	0.971753	0	NA	-1.778	0.0112845	-1.0968	0.0105695	-2.58175	3.5087e-07	-1.27979	0.0562417	-0.992951	0.00344279	-2.11751	8.30827e-05	-1.71727	0.0314936	-2.07808	0.000105138	3.18806	0.000554973	4.03266	1.67301e-06	0.844603	0.169714	2.31178	0.0190368	4.48523	5.19499e-07	2.17345	0.0113274	4.49002	2.67581e-05	5.62146	9.696e-10	1.13144	0.0311674	2.71202	7.14971e-05	4.52466	1.15115e-06	1.81264	0.00419081	-0.605478
gamma-glutamylserine	-0.242559	0.477247	-0.254831	0.378121	-0.382691	0.763742	-0.485272	0.540288	0	NA	0.332397	0.478629	0.424876	0.488086	-0.254831	0.248608	-1.02297	0.125825	0.182163	0.537727	0	NA	-0.307886	0.636084	-0.0407453	0.910182	0.727398	0.316631	0.768144	0.331198	-0.0530174	0.42522	0.587266	0.250913	0.640283	0.22617	-0.720452	0.289593	-0.720452	0.233614	0	NA	-0.235181	0.465792	0.0972162	0.881734	0.332397	0.436077	-0.29336
gamma-glutamylleucine	1.40433e-16	0.477247	1.40433e-16	0.502092	0.669993	0.0380978	1.40433e-16	0.492124	1.40433e-16	0.46946	1.40433e-16	0.478629	1.40433e-16	0.383154	1.40433e-16	0.386862	-0.0122603	0.412538	1.40433e-16	0.405935	1.40433e-16	0.385685	-0.682253	0.0153281	1.40433e-16	0.413127	0.0122603	0.412538	0.0122603	0.459279	1.40433e-16	0.42522	0.682253	0.0155315	0.682253	0.021795	1.40433e-16	0.409898	1.40433e-16	0.409325	1.40433e-16	0.435335	1.40433e-16	0.465792	1.40433e-16	0.437448	1.40433e-16	0.436077	0.223331
gamma-glutamylvaline	-2.80867e-16	0.477247	-0.11559	0.502092	1.06941	0.190104	-2.80867e-16	0.492124	-2.80867e-16	0.46946	-1.21258	0.0438306	-2.80867e-16	0.383154	-0.11559	0.386862	0.19622	0.771752	-2.80867e-16	0.405935	-2.80867e-16	0.385685	-2.08577	0.00132866	0.11559	0.413127	1.4513	0.0250294	1.33571	0.0723844	-2.80867e-16	0.42522	2.52071	3.99294e-05	2.52071	8.86019e-05	-2.80867e-16	0.409898	1.64752	0.00125503	1.64752	0.00201231	-2.80867e-16	0.465792	0.434944	0.275665	0.434944	0.284348	0.317941
gamma-glutamylisoleucine*	0.63204	0.0636319	0.0695873	0.902433	0.675417	0.322452	-0.578476	0.216266	-0.174136	0.716156	-0.678324	0.419664	0.840918	0.0209362	0.241617	0.492879	-0.00962227	0.992435	-0.369598	0.296408	-0.00210649	0.997062	-1.36336	0.0176204	0.379091	0.25386	1.63529	0.0116992	1.2562	0.103121	-0.183362	0.641011	1.67867	0.000319886	1.86203	0.000508539	-0.22021	0.540706	0.784755	0.202798	1.00496	0.105637	0.18413	0.671735	0.684907	0.254403	0.500777	0.436077	0.459015
N,N-dimethyl-pro-pro	1.65843	5.61456e-07	0.340326	0.737795	1.25804	0.22799	1.08301	0.0246298	1.45027	0.0528095	0.646462	0.134544	0.593732	0.0880072	-0.675977	0.372533	-0.745703	0.412187	0.0183141	0.94303	0.433968	0.450344	-1.35728	0.000423259	1.06384	0.106144	2.25167	0.0190064	1.18784	0.321599	-0.254269	0.623408	1.85128	1.43613e-05	2.10555	0.00491683	-0.205874	0.732542	0.912239	0.0675633	1.11811	0.0916565	0.161385	0.709474	0.475688	0.0693391	0.314304	0.436077	1.0856
N-methylpipecolate	-0.534808	0.0125609	0.175817	0.737795	-0.220408	0.765352	0.294825	0.492124	0.250235	0.59633	-0.472483	0.478629	-0.462609	0.114274	0.108728	0.762266	0.0868835	0.855601	0.367024	0.214876	0.183146	0.643461	-0.165191	0.762546	-0.748779	0.0298108	-0.280018	0.412538	0.46876	0.315913	-0.0381534	0.906177	0.0343816	0.943806	0.072535	0.902241	-0.177441	0.651814	0.269474	0.527616	0.446916	0.389107	-0.222031	0.609863	-0.497833	0.372587	-0.275802	0.590733	-0.193133
2-acetamidobutanoate	0	NA	0.300482	0.502092	0.0379185	0.954381	-0.306047	0.663349	0.277119	0.62347	-0.334882	0.26842	0.718846	0.095486	0.126413	0.669723	0.138397	0.691949	0.412799	0.322875	0.103049	0.83007	-0.234403	0.415912	0.112418	0.413127	0.196485	0.412538	0.084067	0.797044	0.4129	0.238848	0.234403	0.436089	-0.178497	0.709549	-0.480015	0.40375	-0.383964	0.409457	0.0960513	0.808937	0.10315	0.866724	-0.412799	0.34694	-0.515949	0.267103	0.1128
p-aminobenzoate (PABA)	0.0866859	0.488897	-0.0471595	0.872579	-0.0654338	0.765352	0.0235965	0.923862	-0.0508614	0.61716	0.055846	0.499416	0.048763	0.667895	-0.291811	0.0562417	-0.143633	0.189348	-0.0143264	0.911776	-0.295513	0.112859	-0.0223534	0.840998	0.374635	0.0300495	0.227795	0.0631927	-0.14684	0.43042	0.24079	0.256827	0.0756753	0.587869	-0.165114	0.438711	0.0340609	0.796149	0.0353989	0.750143	0.00133802	0.983672	-0.0403971	0.610094	0.0676484	0.429073	0.108045	0.276531	-0.00863577
benzoate	0.113958	0.732329	0.653916	0.460722	-0.70054	0.34408	0.0458483	0.492124	0.213222	0.64489	-0.147726	0.820338	-0.0862825	0.383154	-0.785573	0.185679	-0.402516	0.43578	-0.154392	0.537972	-1.22627	0.0364411	0.150298	0.785609	0.901534	0.129815	1.17545	0.0199805	0.273916	0.727102	1.44149	0.0272672	0.360953	0.484885	-1.08054	0.103253	0.202243	0.409898	0.859217	0.0143453	0.656974	0.122986	0.369617	0.381341	0.665642	0.105599	0.296026	0.547352	0.0224446
sulfate*	-0.0156491	0.826497	-0.0503095	0.840958	-0.017434	0.900728	-0.0305634	0.526677	-0.0811527	0.0805106	-0.0415383	0.342147	-0.000642384	0.991848	-0.240743	0.0771533	-0.0198841	0.780438	-0.0155566	0.754906	-0.271586	0.0405816	-0.0439884	0.332759	0.26285	0.0847264	0.0368371	0.639264	-0.226013	0.18885	0.228189	0.109158	0.0350522	0.52583	-0.193137	0.147409	0.0227491	0.550663	0.0175953	0.642	-0.00515381	0.883178	-0.0278402	0.522182	0.00662044	0.886712	0.0344606	0.436077	-0.0277975
phenol red	0.0151368	0.895723	0.0128463	0.961005	0.00954421	0.966464	0.0164102	0.849296	-0.00747523	0.811356	-0.0266987	0.649471	0.10409	0.0913114	-0.20971	0.140171	0.0579131	0.585552	0.105363	0.27092	-0.230032	0.190424	0.0216702	0.802111	0.35332	0.0451922	0.0893307	0.412538	-0.263989	0.18885	0.351029	0.102368	0.0837381	0.490267	-0.267291	0.198169	0.0395198	0.322272	0.0431541	0.421255	0.00363432	0.940612	0.0156343	0.754147	4.52256e-05	0.999028	-0.0155891	0.563162	0.0125091
[truncated: 13 more rows]
[truncated: 10 more columns]
