# Supplementary material for: Impaired amino acid uptake leads to global metabolic imbalance of Candida albicans biofilms
Source: NPJ Biofilms Microbiomes. 2022 Oct 13;8:78. doi: 10.1038/s41522-022-00341-9 (PMC9556537; doi:10.1038/s41522-022-00341-9)
Supplement: Supplementary file 4 — S3 Secretome data set [file 41522_2022_341_MOESM4_ESM.xlsx]

## Sheet: c (Protein)
Sample	µg/µl
WT -24h-1	1.113
WT-24h-2	1.209
WT-24h-3	1.667
stp2∆-24h-1	0.853
stp2∆-24h-2	1.192
stp2∆-24h-3	1.0965
WT -48h-1	1.2835
WT-48h-2	1.604
WT-48h-3	1.453
stp2∆-48h-1	1.399
stp2∆-48h-2	1.4346
stp2∆-48h-3	1.734

## Sheet: Proteins (n=1103)
																										Fold Change				Ratio (log2)				Ratio				ratio-adjusted p-value (p-value/log4ratio)				p-value, 2s t-test				Average Abundances
Gene Symbol	Accession	Description	Coverage [%]	Rank (n=1103)	PSMs/AAs	PSMs	Peptides	Unique Peptides	Razor Peptides	Modifications	AAs	MW [kDa]	calc. pI	Score Mascot	Score MS Amanda 2.0	Score Sequest HT	Exp. q-value	Sum PEP Score	Biological Process	Cellular Component	Molecular Function	Pfam IDs	Entrez Gene ID	Ensembl Gene ID	KEGG Pathways	Stp2-24h / WT-24h	Stp2-48h / WT-48h	Stp2-48h / Stp2-24h	WT-48h / WT-24h	Stp2-24h / WT-24h	Stp2-48h / WT-48h	Stp2-48h / Stp2-24h	WT-48h / WT-24h	Stp2-24h / WT-24h	Stp2-48h / WT-48h	Stp2-48h / Stp2-24h	WT-48h / WT-24h	Stp2-24h / WT-24h	Stp2-48h / WT-48h	Stp2-48h / Stp2-24h	WT-48h / WT-24h	Stp2-24h / WT-24h	Stp2-48h / WT-48h	Stp2-48h / Stp2-24h	WT-48h / WT-24h	WT-24h	Stp2-24h	WT-48h	Stp2-48h
ATH1; ATC1	Q5AAU5	Cell wall acid trehalase ATC1 OS=Candida albicans (strain SC5314 / ATCC MYA-2876) OX=237561 GN=ATC1 PE=1 SV=2	4	934	0.028757	31	3	3	0		1078	120.2	5.21	276	2078.89	14.31	0	14.787	metabolic process	extracellular	catalytic activity	Pf03632, Pf03636	3639570	I503_00677		-812.128	-1.23472	496.441	-1.32491	-9.66556	-0.304189	8.95548	-0.405894	0.00123133	0.809898	496.441	0.754768	1.31348e-06	1	0.00610496	1	6.34778e-06	0.612303	0.0273364	0.272097	1.35014e+06	1662.47	1.01904e+06	825319
RNY12; CAALFM_C504260WA	Q5AKB1	Ribonuclease T2-like 1-B OS=Candida albicans (strain SC5314 / ATCC MYA-2876) OX=237561 GN=RNY1-B PE=3 SV=1	8	508	0.200969	83	3	3	0		413	45.7	6.51	657	6360.04	45.8	0	19.862	metabolic process	cytoplasm;organelle lumen;vacuole	catalytic activity;RNA binding	Pf00445	3636451			-25.2256	-4.99081	2.06753	-2.44466	-4.65682	-2.31927	1.04791	-1.28963	0.0396423	0.200368	2.06753	0.409055	1.43548e-06	0.00194892	0.241514	0.000429036	3.34237e-06	0.00226004	0.126543	0.00027665	8.20529e+06	325276	3.35641e+06	672519
RSP5	Q59Y21	E3 ubiquitin-protein ligase OS=Candida albicans (strain SC5314 / ATCC MYA-2876) OX=237561 GN=RSP5 PE=4 SV=1	14	705	0.0949519	79	11	11	0		832	93.4	6.35	407	4369.65	12.57	0	38.916	metabolic process		catalytic activity;protein binding	Pf00168, Pf00397, Pf00632	3643898	W5Q_02263; I503_02277	MAPK signaling pathway - yeast; Ubiquitin mediated proteolysis; Endocytosis	-11.4042	-9.626	12.1471	10.2531	-3.51149	-3.26694	3.60253	3.35798	0.0876873	0.103885	12.1471	10.2531	1.01487e-05	0.0474392	0.0201349	0.0449386	1.78185e-05	0.0774905	0.0362684	0.0754516	2.65201e+06	232547	2.71912e+07	2.82476e+06
RPS13	A0A1D8PPE0	Ribosomal 40S subunit protein S13 OS=Candida albicans (strain SC5314 / ATCC MYA-2876) OX=237561 GN=RPS13 PE=3 SV=1	15	511	0.198675	30	2	2	0		151	16.9	10.23	176	1643.44	6.78	0	6.017	metabolic process	ribosome	structural molecule activity	Pf00312, Pf08069	30515328	W5Q_04654; I503_04630		70.3194	-2.3984	-6.28625	26.829	6.13585	-1.26207	-2.6522	4.74572	70.3194	0.416945	0.159077	26.829	1.56133e-05	0.859913	0.00313102	0.125569	4.79005e-05	0.542636	0.00415204	0.297958	19932.5	1.40164e+06	534771	222970
CaO19.12497; CaO19.5030; DOS2	Q5AKU7	Dos2p OS=Candida albicans (strain SC5314 / ATCC MYA-2876) OX=237561 GN=DOS2 PE=4 SV=1	18	606	0.139276	50	6	6	0		359	41.5	4.6	349	3229.47	3.84	0	19.141				Pf03909	3636183	W5Q_01345; I503_01377		-12.155	-9.2049	19.8018	14.9957	-3.60348	-3.2024	4.30756	3.90648	0.0822705	0.108638	19.8018	14.9957	1.60421e-05	0.191705	0.0817242	0.146601	2.89036e-05	0.306958	0.176016	0.286347	881108	72489.2	1.32129e+07	1.43542e+06
TFS1	Q5A1M1	Tfs1p OS=Candida albicans (strain SC5314 / ATCC MYA-2876) OX=237561 GN=TFS1 PE=4 SV=1	62	80	1.96139	508	12	12	0		259	29.3	6.65	2550	30900.1	173.97	0	86.215				Pf01161	3642655	W5Q_04128; I503_04129		-6.89354	1.02264	82.2451	11.6666	-2.78525	0.0322951	6.36186	3.54432	0.145063	1.02264	82.2451	11.6666	2.67186e-05	1	0.000236768	0.0388733	3.72089e-05	0.956016	0.000753141	0.0688896	5.36221e+07	7.7786e+06	6.2559e+08	6.39752e+08
HCH1	A0A1D8PPR5	Hch1p OS=Candida albicans (strain SC5314 / ATCC MYA-2876) OX=237561 GN=HCH1 PE=4 SV=1	26	410	0.296053	45	3	3	0		152	17.7	5.07	193	2279.58	2.38	0	9.545	regulation of biological process		enzyme regulator activity;protein binding	Pf09229	3641626	W5Q_04765		-9.62241	-5.46604	8.31879	4.72551	-3.2664	-2.4505	3.05637	2.24047	0.103924	0.182948	8.31879	4.72551	4.9834e-05	0.100157	0.000519974	0.118404	8.13888e-05	0.122717	0.000794617	0.132641	3.0571e+06	317706	1.44464e+07	2.64293e+06
TIF11	Q5A5P8	Tif11p OS=Candida albicans (strain SC5314 / ATCC MYA-2876) OX=237561 GN=TIF11 PE=3 SV=1	16	448	0.246753	38	2	2	0		154	17.4	4.93	392	2346.01	9.03	0	11.529	metabolic process;response to stimulus		RNA binding	Pf01176	3641208	W5Q_02486; I503_02490	RNA transport	-57.2987	-7.15007	85.9631	10.727	-5.84043	-2.83796	6.42565	3.42317	0.0174524	0.139859	85.9631	10.727	5.24079e-05	0.237833	0.00029362	0.184028	0.000153042	0.337479	0.000943348	0.314979	1.46714e+06	25605.1	1.5738e+07	2.2011e+06
PHO8	A0A1D8PEV2	Alkaline phosphatase OS=Candida albicans (strain SC5314 / ATCC MYA-2876) OX=237561 GN=PHO8 PE=3 SV=1	18	584	0.151394	76	5	5	0		502	55	5.72	684	6123.53	39.56	0	30.688	metabolic process		catalytic activity	Pf00245	3647179	I503_01014	Metabolic pathways; Folate biosynthesis; Thiamine metabolism	-6.21648	1.86509	3.00335	-3.86045	-2.6361	0.899246	1.58657	-1.94877	0.160863	1.86509	3.00335	0.259037	5.32559e-05	0.758627	0.239582	0.000272519	7.01938e-05	0.341096	0.190057	0.000265539	4.90875e+06	789636	1.27155e+06	2.37155e+06
NUP170; CAALFM_C105660CA	A0A1D8PDK7	Uncharacterized protein OS=Candida albicans (strain SC5314 / ATCC MYA-2876) OX=237561 GN=orf19.2485 PE=4 SV=1	2	1073	0.00701262	10	2	2	0		1426	161.6	5.76	32	334.31	0	0	7.795	transport		structural molecule activity	Pf03177, Pf08801	3639900		RNA transport	-5.66298	-2.02314	184.451	65.8965	-2.50156	-1.0166	7.52709	6.04213	0.176585	0.494281	184.451	65.8965	6.90667e-05	1	0.0073064	0.0794813	8.63873e-05	0.526018	0.027498	0.240118	9414.53	1662.47	620384	306644
CaO19.1946; CAALFM_C501230CA; CaO19.9501	Q5A1Q0	Glucose-6-phosphate 1-epimerase OS=Candida albicans (strain SC5314 / ATCC MYA-2876) OX=237561 GN=orf19.1946 PE=3 SV=1	31	240	0.645485	193	8	8	0		299	33.8	5.64	1064	10427.2	42.81	0	25.985	metabolic process		catalytic activity	Pf01263	3642618	W5Q_04155; I503_04156	Biosynthesis of secondary metabolites; Biosynthesis of antibiotics; Glycolysis / Gluconeogenesis; Metabolic pathways	-7.9275	-2.70314	9.25351	3.15528	-2.98687	-1.43463	3.21	1.65777	0.126143	0.369941	9.25351	3.15528	7.58383e-05	0.434204	0.0070472	0.330816	0.000113259	0.311462	0.0113108	0.274208	1.10787e+07	1.3975e+06	3.49564e+07	1.29318e+07
CaJ7_0047; CaO19.7085; CAALFM_C700350CA	A0A1D8PQJ8	Uncharacterized protein OS=Candida albicans (strain SC5314 / ATCC MYA-2876) OX=237561 GN=orf19.7085 PE=4 SV=1	26	280	0.526196	231	8	8	0		439	50.4	6.57	1404	15345	82.83	0	39.092					3638039	W5Q_05090; I503_05046		-5.36686	-3.16887	30.2933	17.8867	-2.42408	-1.66397	4.92092	4.16082	0.186329	0.31557	30.2933	17.8867	7.73226e-05	0.116912	9.33347e-05	0.0195193	9.37179e-05	0.0972692	0.000229647	0.040608	3.32409e+06	619373	5.9457e+07	1.87628e+07
CaO19.2259; CAALFM_C207030CA	A0A1D8PHU0	Mitochondrial 54S ribosomal protein MRPL50 OS=Candida albicans (strain SC5314 / ATCC MYA-2876) OX=237561 GN=orf19.2259 PE=4 SV=1	34	268	0.546125	148	7	7	0		271	30.4	5.3	1660	11452.8	64.98	0	29.585	metabolic process	ribosome	structural molecule activity	Pf01281	3643498	W5Q_02125; I503_02141		-8.78407	-2.45209	16.8631	4.70736	-3.13489	-1.29401	4.0758	2.23492	0.113842	0.407816	16.8631	4.70736	0.000109424	0.640649	0.0119147	0.257043	0.000171516	0.414503	0.024281	0.287235	4.31413e+06	491131	2.03081e+07	8.28198e+06
YPS7; CaJ7_0269	Q5AH56	Putative aspartic endopeptidase OS=Candida albicans (strain SC5314 / ATCC MYA-2876) OX=237561 GN=YPS7 PE=3 SV=1	4	835	0.0485021	34	2	2	0		701	75.8	4.82	39	1457.5	5.84	0	6.177	metabolic process;response to stimulus	membrane	catalytic activity	Pf00026, Pf14543	3636937	W5Q_05273; I503_05232		-88.9331	-3.48127	33.8608	1.32548	-6.47465	-1.79961	5.08154	0.40651	0.0112444	0.287251	33.8608	1.32548	0.000136599	0.000737619	0.00125223	0.277219	0.000442216	0.000663715	0.00318164	0.0563461	1.95464e+06	21978.7	2.59082e+06	744217
AHA1	A0A1D8PU72	Aha1p OS=Candida albicans (strain SC5314 / ATCC MYA-2876) OX=237561 GN=AHA1 PE=4 SV=1	26	422	0.280347	97	7	7	0		346	38.7	6.14	1818	9553.73	87.34	0	33.371	regulation of biological process;response to stimulus		enzyme regulator activity;protein binding	Pf08327, Pf09229	3638933	W5Q_06467; I503_06413		-5.24766	-3.50244	9.63422	6.43017	-2.39167	-1.80836	3.26817	2.68486	0.190561	0.285515	9.63422	6.43017	0.00013685	0.268429	0.0224988	0.131487	0.00016365	0.242709	0.036765	0.176512	5.95418e+06	1.13464e+06	3.82864e+07	1.09313e+07
RPS15	A0A1D8PK22	Ribosomal 40S subunit protein S15 OS=Candida albicans (strain SC5314 / ATCC MYA-2876) OX=237561 GN=RPS15 PE=3 SV=1	28	160	1.06338	151	2	2	0		142	15.9	10.32	1023	9239.11	40.58	0	18.541	metabolic process	ribosome	RNA binding;structural molecule activity	Pf00203	3635194	W5Q_02976; I503_02970		-7.49294	-1.50107	14.8199	2.96889	-2.90553	-0.585995	3.88946	1.56992	0.133459	0.66619	14.8199	2.96889	0.00016304	1	0.0100703	0.5092	0.000236859	0.668255	0.0195841	0.399702	4.44662e+06	593441	1.32015e+07	8.79472e+06
CaO19.4409; CAALFM_C405980CA	A0A1D8PMG4	Nucleotide diphosphatase/phosphodiesterase OS=Candida albicans (strain SC5314 / ATCC MYA-2876) OX=237561 GN=orf19.4409 PE=4 SV=1	4	767	0.0680174	47	2	2	0		691	78.5	5.02	146	2724.31	5.16	0	8.766	metabolic process	membrane	catalytic activity	Pf01663	3646516			-10.038	-1.20718	13.3583	1.60647	-3.3274	-0.271635	3.73966	0.683898	0.0996216	0.82838	13.3583	1.60647	0.000233511	1	0.0258538	0.895552	0.000388492	0.703093	0.0483422	0.306233	1.25766e+06	125290	2.0204e+06	1.67366e+06
ASM3	Q5ABD3	Asm3p OS=Candida albicans (strain SC5314 / ATCC MYA-2876) OX=237561 GN=ASM3 PE=4 SV=1	21	261	0.5686	402	10	10	0		707	82.2	5.34	2619	30781.1	163.47	0	61.201			catalytic activity	Pf00149	3639332	W5Q_00062; I503_00062		-43.1901	-2.52692	6.78519	-2.51902	-5.43263	-1.33738	2.76239	-1.33286	0.0231535	0.395739	6.78519	0.39698	0.000346996	0.201125	0.0506823	0.0300503	0.000942551	0.13449	0.0700022	0.0200265	6.45487e+07	1.49453e+06	2.56245e+07	1.01406e+07
CaO19.1338; CAALFM_C703370CA	A0A1D8PRB4	Uncharacterized protein OS=Candida albicans (strain SC5314 / ATCC MYA-2876) OX=237561 GN=orf19.1338 PE=4 SV=1	12	635	0.123626	45	3	3	0		364	41.1	4.67	155	2866.99	3.9	0	10.207				Pf10310	3646720			-920.973	-2.03985	2806.6	6.2163	-9.84702	-1.02846	11.4546	2.63606	0.00108581	0.490232	2806.6	6.2163	0.000371849	0.047768	0.000110765	0.00278119	0.0018308	0.0245638	0.000634384	0.00366569	1.53109e+06	1662.47	9.51771e+06	4.66588e+06
ZUO1	Q5AF98	Zuotin OS=Candida albicans (strain SC5314 / ATCC MYA-2876) OX=237561 GN=ZUO1 PE=4 SV=1	17	495	0.210773	90	6	6	0	Acetyl [N-Term]	427	48.3	8.54	548	5610.31	26.48	0	23.705				Pf00226	3637908	W5Q_03574; I503_03586		-3.40987	-1.98931	1.12116	-1.52886	-1.76972	-0.992268	0.164994	-0.612456	0.293266	0.502687	1.12116	0.654082	0.000455501	0.720651	1	0.984414	0.000403054	0.357539	0.79928	0.301455	4.97344e+06	1.45854e+06	3.25304e+06	1.63526e+06
CaO19.4688; DAG7; CaO19.12157	Q5AMF9	Dag7p OS=Candida albicans (strain SC5314 / ATCC MYA-2876) OX=237561 GN=DAG7 PE=4 SV=1	10	605	0.139442	35	3	3	0		251	26.3	4.51	234	2108.33	12.71	0	11.681	response to stimulus	extracellular		Pf03330	3635607			-9.80036	-35.5957	-1.1805	3.07674	-3.29283	-5.15363	-0.239394	1.6214	0.102037	0.0280933	0.847101	3.07674	0.000482724	0.145138	1	0.648272	0.000794765	0.373994	0.906754	0.525555	2.63715e+06	269087	8.11382e+06	227944
CaO19.14108; CaO19.6816; CAALFM_C306860CA	Q5ADM5	Aldo-keto reductase superfamily protein OS=Candida albicans (strain SC5314 / ATCC MYA-2876) OX=237561 GN=orf19.6816 PE=4 SV=1	15	542	0.173759	49	3	3	0		282	32	6.54	211	2244.75	2.31	0	12.827	metabolic process		catalytic activity	Pf00248	3638541	W5Q_03197; I503_03197		-47.1872	-1.88577	221.582	8.85521	-5.56032	-0.915152	7.7917	3.14653	0.0211922	0.530288	221.582	8.85521	0.00048721	1	0.00361992	0.167371	0.00135452	0.535463	0.0141027	0.263318	410816	8706.07	3.63786e+06	1.92911e+06
SAM4	A0A1D8PEB0	S-adenosylmethionine-homocysteine S-methyltransferase OS=Candida albicans (strain SC5314 / ATCC MYA-2876) OX=237561 GN=SAM4 PE=4 SV=1	17	737	0.0803859	25	4	4	0		311	34.3	4.86	107	774.01	6.91	0	11.069	metabolic process		catalytic activity;metal ion binding	Pf02574	3646506	I503_00817	Biosynthesis of secondary metabolites; Cysteine and methionine metabolism; Metabolic pathways	-9.85341	-10.8022	5.21356	5.71559	-3.30062	-3.43326	2.38227	2.5149	0.101488	0.0925736	5.21356	5.71559	0.000569404	0.0281945	0.055242	0.0497996	0.000939694	0.0483995	0.0658006	0.0626205	841456	85397.4	4.80942e+06	445225
FET31	A0A1D8PPE2	Fet31p OS=Candida albicans (strain SC5314 / ATCC MYA-2876) OX=237561 GN=FET31 PE=3 SV=1	17	320	0.432956	268	5	4	0		619	70.5	4.79	1916	27683.8	250.24	0	60.392	metabolic process;response to stimulus	membrane	catalytic activity;metal ion binding	Pf00394, Pf07731, Pf07732	3647151	W5Q_04637		-8.9743	-3.75302	-1.45343	-3.47548	-3.1658	-1.90805	-0.539464	-1.79721	0.111429	0.266452	0.688027	0.28773	0.000721922	0.00260585	1	0.00289572	0.00114273	0.00248605	0.342443	0.00260211	7.08231e+07	7.89178e+06	2.0378e+07	5.42975e+06
SLB2; LSP1	Q59KV8	Lipid-binding protein OS=Candida albicans (strain SC5314 / ATCC MYA-2876) OX=237561 GN=LSP1 PE=4 SV=1	63	149	1.11041	352	13	11	0		317	35.6	4.98	1501	23246.9	110.88	0	76.718				Pf13805	3648025	W5Q_02096; I503_02112		-4.00281	-3.76017	5.76276	5.41344	-2.00101	-1.9108	2.52676	2.43655	0.249825	0.265945	5.76276	5.41344	0.00075359	0.362545	0.108101	0.24273	0.000753971	0.346375	0.136572	0.295711	1.84715e+07	4.61463e+06	9.99944e+07	2.6593e+07
HRP1; CAALFM_C305150WA	Q5ANB5	Uncharacterized protein OS=Candida albicans (strain SC5314 / ATCC MYA-2876) OX=237561 GN=orf19.5989 PE=4 SV=1	18	438	0.261053	124	5	5	0	Acetyl [N-Term]	475	51.6	5	651	9020.26	9.51	0	32.816			RNA binding	Pf00076, Pf13893, Pf14259	3635162	W5Q_03024; I503_03018	mRNA surveillance pathway	-4.11832	-2.5173	7.59629	4.64319	-2.04205	-1.33188	2.9253	2.21512	0.242818	0.397251	7.59629	4.64319	0.000753649	0.103757	0.00303284	0.0269311	0.000769496	0.0690957	0.00443598	0.0298278	3.22484e+06	783047	1.49735e+07	5.94826e+06
DOP99; CAALFM_C111580WA	Q59TT2	Uncharacterized protein OS=Candida albicans (strain SC5314 / ATCC MYA-2876) OX=237561 GN=orf19.1162 PE=4 SV=1	36	287	0.504	63	3	3	0		125	14.8	6.33	343	3362.53	2.46	0	17.629				Pf08883	3645330	W5Q_01120; I503_01130		-17.7597	-3.37875	86.0913	16.3787	-4.15053	-1.75649	6.4278	4.03375	0.0563073	0.295967	86.0913	16.3787	0.000779365	0.499815	0.0470076	0.152374	0.00161739	0.43896	0.151078	0.307319	533746	30053.8	8.74208e+06	2.58737e+06
PEP1	A0A1D8PFH5	Sortilin OS=Candida albicans (strain SC5314 / ATCC MYA-2876) OX=237561 GN=PEP1 PE=4 SV=1	13	442	0.255414	342	13	13	0		1339	150.4	4.92	2830	25365.4	170.82	0	73.003	transport	Golgi;membrane	protein binding		3647612			-3.98204	-2.91887	1.50632	1.10414	-1.99351	-1.54541	0.591025	0.142929	0.251128	0.342598	1.50632	1.10414	0.000795122	0.336427	0.217416	1	0.00079254	0.259959	0.0642491	0.860859	1.6485e+07	4.13985e+06	1.82018e+07	6.23592e+06
UBP6	A0A1D8PC77	Ubiquitin-specific protease OS=Candida albicans (strain SC5314 / ATCC MYA-2876) OX=237561 GN=UBP6 PE=3 SV=1	15	543	0.17364	83	6	6	0		478	54.1	6.2	515	4684.62	18.92	0	26.673	metabolic process		catalytic activity;protein binding	Pf00240, Pf00443, Pf13423	3639317	W5Q_00038; I503_00038		-4.62337	-3.85169	6.34932	5.28957	-2.20894	-1.94549	2.6666	2.40315	0.216292	0.259626	6.34932	5.28957	0.00079952	0.31961	0.0126717	0.226093	0.000883048	0.3109	0.0168952	0.271667	2.17085e+06	469539	1.14829e+07	2.98125e+06
CDG1	Q5A3Z5	Cysteine dioxygenase CDG1 OS=Candida albicans (strain SC5314 / ATCC MYA-2876) OX=237561 GN=CDG1 PE=2 SV=1	9	880	0.0377358	10	2	2	0		265	29.8	6.29	69	779.03	0	0	8.257	metabolic process		catalytic activity;metal ion binding	Pf05995	3641883	W5Q_06369; I503_06315	Taurine and hypotaurine metabolism; Cysteine and methionine metabolism; Metabolic pathways	-103.388	-7.36311	242.8	17.2918	-6.69193	-2.88032	7.92362	4.11201	0.0096723	0.135812	242.8	17.2918	0.000801354	0.0813516	0.00268245	0.0462529	0.0026813	0.117159	0.0106274	0.0950963	171879	1662.47	2.9721e+06	403647
CaO19.10010; CaO19.2473; CAALFM_C105780WA	Q5AA11	Uncharacterized protein OS=Candida albicans (strain SC5314 / ATCC MYA-2876) OX=237561 GN=orf19.2473 PE=4 SV=1	4	1001	0.0173502	11	2	2	0		634	71.8	4.98	51	645.59	0	0	7.599	regulation of biological process		DNA binding		3639888			-7.87089	-7.85697	28.0931	28.0435	-2.97653	-2.97397	4.81215	4.80959	0.12705	0.127276	28.0931	28.0435	0.000895689	0.279669	0.0656881	0.15467	0.00133302	0.415864	0.15805	0.371949	40687	5169.3	1.141e+06	145222
CaO19.5591; ADO1	A0A1D8PQ26	Adenosine kinase OS=Candida albicans (strain SC5314 / ATCC MYA-2876) OX=237561 GN=ADO1 PE=4 SV=1	80	64	2.3487	815	20	20	0		347	38.2	5.14	5334	59761.4	421.87	0	144.818	metabolic process;response to stimulus		catalytic activity	Pf00294	3639274	W5Q_04882; I503_04865	Metabolic pathways; Purine metabolism	-8.33486	-2.30872	18.4957	5.12323	-3.05916	-1.20709	4.20912	2.35705	0.119978	0.433141	18.4957	5.12323	0.000922568	0.425534	0.00171996	0.110876	0.00141114	0.25683	0.00361976	0.130671	3.88162e+07	4.65709e+06	1.98864e+08	8.61363e+07
CBP1	P31225	Corticosteroid-binding protein OS=Candida albicans (strain SC5314 / ATCC MYA-2876) OX=237561 GN=CBP1 PE=1 SV=2	18	585	0.151329	74	4	4	0		489	55.5	5.29	446	4757.34	23.98	0	17.038	metabolic process		catalytic activity	Pf00070, Pf01593, Pf03486, Pf13450	3641920	W5Q_06376; I503_06322	Arginine and proline metabolism; beta-Alanine metabolism	-7.30774	-3.1222	10.1546	4.33852	-2.86943	-1.64256	3.34407	2.1172	0.136841	0.320287	10.1546	4.33852	0.000980133	0.0287602	0.00481511	0.0129922	0.00140621	0.0236202	0.00805102	0.0137535	1.39357e+06	190697	6.04601e+06	1.93646e+06
TIF35	Q59ZV5	Eukaryotic translation initiation factor 3 subunit G OS=Candida albicans (strain SC5314 / ATCC MYA-2876) OX=237561 GN=TIF35 PE=3 SV=1	17	437	0.261649	73	3	3	0		279	30.7	9.06	314	3720.79	9.27	0	16.399	metabolic process	cytoplasm	RNA binding	Pf00076, Pf12353, Pf13893, Pf14259	3643308	W5Q_01378; I503_01410	RNA transport	-10.7423	-4.5609	7.45196	3.16389	-3.42524	-2.18932	2.89762	1.6617	0.0930895	0.219255	7.45196	3.16389	0.00101018	0.0220287	0.00539303	0.0437261	0.00173006	0.0241139	0.00781348	0.0363299	2.34492e+06	218287	7.41906e+06	1.62667e+06
DUR1,2	A0A1D8PDC6	Bifunctional urea carboxylase/allophanate hydrolase OS=Candida albicans (strain SC5314 / ATCC MYA-2876) OX=237561 GN=DUR1,2 PE=4 SV=1	2	974	0.0220629	40	3	3	0		1813	200.3	6.13	224	2287.99	5.25	0	13.302	metabolic process;response to stimulus		catalytic activity;metal ion binding;nucleotide binding	Pf00289, Pf00364, Pf01425, Pf02222, Pf02626, Pf02682, Pf02785, Pf02786, Pf07478, Pf13535, Pf15632	3644771	I503_00458	Arginine biosynthesis; Atrazine degradation; Metabolic pathways	435.726	92.2325	-1.55225	3.04346	8.76728	6.5272	-0.634362	1.60571	435.726	92.2325	0.644226	3.04346	0.0010439	0.0355362	1	0.58846	0.00457609	0.115976	0.382308	0.472449	4020.78	1.75196e+06	12237.1	1.12866e+06
CaO19.1766; CAALFM_C210150WA	A0A1D8PIN7	Uncharacterized protein OS=Candida albicans (strain SC5314 / ATCC MYA-2876) OX=237561 GN=orf19.1766 PE=4 SV=1	4	927	0.0299252	12	1	1	0		401	45	5.19	162	1221.73	10.76	0.002	5.801			catalytic activity	Pf03663	3643933	W5Q_02436; I503_02440		-390.99	-1.43911	293.596	1.08064	-8.61099	-0.525179	8.19769	0.11188	0.00255761	0.694873	293.596	1.08064	0.00108354	1	0.00305121	1	0.00466519	0.644535	0.0125065	0.908966	650009	1662.47	702423	488094
HSP12; CAALFM_C502110WA	A0A1D8PNC7	Hsp12p OS=Candida albicans (strain SC5314 / ATCC MYA-2876) OX=237561 GN=HSP12 PE=4 SV=1	69	123	1.40945	179	9	9	0		127	13.3	5.03	1240	10736.7	32.52	0	46.995	response to stimulus			Pf04119	3637732; 3643745	I503_04237		-4.84152	-1.99529	11.8008	4.86335	-2.27546	-0.9966	3.56081	2.28195	0.206547	0.50118	11.8008	4.86335	0.0011039	1	0.122528	0.363322	0.00125594	0.619431	0.21815	0.414541	1.49089e+07	3.07939e+06	7.25073e+07	3.63392e+07
CTA3	A0A1D8PF53	Cta3p OS=Candida albicans (strain SC5314 / ATCC MYA-2876) OX=237561 GN=CTA3 PE=4 SV=1	26	312	0.448302	581	26	26	0	Acetyl [N-Term]	1296	140.2	4.73	4331	43986.6	268.6	0	140.644	regulation of biological process		metal ion binding;protein binding	Pf00627, Pf01576, Pf02463, Pf04111, Pf04582, Pf05483, Pf05911, Pf06160, Pf07926, Pf08317, Pf09726, Pf09731, Pf10473, Pf12763, Pf13166, Pf13870, Pf14915	3645333			-18.2848	-3.06501	83.6587	14.0234	-4.19257	-1.61589	6.38644	3.80976	0.0546902	0.326264	83.6587	14.0234	0.00113688	0.228805	0.00498649	0.0462175	0.00238323	0.184862	0.015923	0.0880387	2.14762e+07	1.17454e+06	3.01169e+08	9.82604e+07
GLN1	A0A1D8PSY1	Glutamine synthetase OS=Candida albicans (strain SC5314 / ATCC MYA-2876) OX=237561 GN=GLN1 PE=3 SV=1	10	771	0.0670241	25	3	3	0	Acetyl [N-Term]	373	41.7	6.07	159	1645.12	1.63	0	10.112	metabolic process		catalytic activity;nucleotide binding	Pf00120, Pf03951	3646386	I503_05928	Glyoxylate and dicarboxylate metabolism; Alanine, aspartate and glutamate metabolism; Nitrogen metabolism; Arginine biosynthesis; Metabolic pathways; Biosynthesis of amino acids	14.5766	3.21138	-4.60525	-1.01459	3.86558	1.68319	-2.20328	-0.0208941	14.5766	3.21138	0.217143	0.985622	0.00121763	0.505594	0.0168907	1	0.00235342	0.425506	0.0186075	0.989624	175485	2.55797e+06	172962	555445
CaO19.3475; CAALFM_C602330WA	A0A1D8PPV6	Uncharacterized protein OS=Candida albicans (strain SC5314 / ATCC MYA-2876) OX=237561 GN=orf19.3475 PE=4 SV=1	60	114	1.50538	280	8	8	0		186	19.6	4.81	3227	22551	147.96	0	59.997					3645877			-9.28699	-9.00196	10.7518	10.4218	-3.21521	-3.17024	3.42651	3.38153	0.107677	0.111087	10.7518	10.4218	0.00128004	0.248752	0.126284	0.228257	0.0020578	0.394301	0.216356	0.38593	3.42095e+07	3.68359e+06	3.56525e+08	3.96053e+07
SLB1; PIL1	A0A1D8PDD1	Lipid-binding protein OS=Candida albicans (strain SC5314 / ATCC MYA-2876) OX=237561 GN=PIL1 PE=4 SV=1	62	107	1.57143	484	13	11	2		308	34.5	4.97	4658	41927	306.52	0	99.576				Pf13805	3644769	I503_00460		-3.61118	-1.62346	11.663	5.24331	-1.85247	-0.699076	3.54387	2.39048	0.276918	0.615967	11.663	5.24331	0.00128253	1	0.0107262	0.211163	0.00118792	0.571075	0.0190062	0.252391	3.18494e+07	8.81967e+06	1.66996e+08	1.02864e+08
GGA2	A0A1D8PCX6	Phosphatidylinositol 4-phosphate-binding protein OS=Candida albicans (strain SC5314 / ATCC MYA-2876) OX=237561 GN=GGA2 PE=4 SV=1	14	579	0.15411	90	5	5	0		584	64.7	6.05	268	5094.25	25.07	0	19.831	transport			Pf00790, Pf02883, Pf03127	3636928	W5Q_00303		-10.4587	-2.96447	21.9763	6.22908	-3.38663	-1.56777	4.45788	2.63902	0.0956143	0.337328	21.9763	6.22908	0.00130742	0.00422484	0.000224311	0.000940702	0.00221388	0.00331179	0.000499976	0.00124127	6.69458e+06	640098	4.17011e+07	1.4067e+07
CaO19.3737; CAALFM_CR02300CA	A0A1D8PS60	Uncharacterized protein OS=Candida albicans (strain SC5314 / ATCC MYA-2876) OX=237561 GN=CAALFM_CR02300CA PE=4 SV=1	4	1037	0.0113493	9	2	2	0		793	90.2	5.34	78	460.38	0	0	7.04					3644938			-34.3594	-22.1328	14.0788	9.06895	-5.10263	-4.46811	3.81545	3.18094	0.0291041	0.0451818	14.0788	9.06895	0.0013374	0.149458	0.14449	0.228791	0.00341214	0.333899	0.275648	0.363884	57121.5	1662.47	518032	23405.6
PYC2	A0A1D8PLY4	Pyruvate carboxylase OS=Candida albicans (strain SC5314 / ATCC MYA-2876) OX=237561 GN=PYC2 PE=4 SV=1	3	940	0.0280374	33	3	3	0		1177	129.6	6.38	43	1008.12	0	0	9.172	metabolic process		catalytic activity;metal ion binding;nucleotide binding	Pf00289, Pf00364, Pf00682, Pf02436, Pf02785, Pf02786, Pf07478, Pf13535, Pf15632	3637323	I503_03688	Pyruvate metabolism; Carbon metabolism; Metabolic pathways; Biosynthesis of amino acids; Citrate cycle (TCA cycle)	9.4064	2.06214	2.61484	11.9276	3.23364	1.04414	1.38672	3.57623	9.4064	2.06214	2.61484	11.9276	0.00137766	0.7105	0.27682	0.139544	0.00222744	0.370931	0.191936	0.249521	103565	974175	1.23528e+06	2.54731e+06
YKT6	Q5AI79	Palmitoyltransferase OS=Candida albicans (strain SC5314 / ATCC MYA-2876) OX=237561 GN=YKT6 PE=3 SV=1	74	51	3.03	606	14	14	0		200	22.9	6.35	3947	36488.9	179.67	0	76.526	cell organization and biogenesis;response to stimulus;transport	membrane	catalytic activity	Pf00957, Pf13774	3636863	W5Q_00276; I503_00275	SNARE interactions in vesicular transport	-7.63917	-2.83334	13.3268	4.94286	-2.93342	-1.5025	3.73626	2.30535	0.130904	0.35294	13.3268	4.94286	0.0013962	0.330881	0.000373103	0.148486	0.00204782	0.248575	0.000697005	0.171156	5.75483e+07	7.53332e+06	2.84453e+08	1.00395e+08
KEX2	A0A1D8PEG3	Kexin OS=Candida albicans (strain SC5314 / ATCC MYA-2876) OX=237561 GN=KEX2 PE=4 SV=1	15	377	0.344017	322	10	10	0		936	104.8	5.03	2142	20944.1	109.2	0	44.046	metabolic process;regulation of biological process;response to stimulus	membrane	catalytic activity	Pf00082, Pf01483	3634914			-6.32901	-3.19105	1.50458	-1.31822	-2.66198	-1.67403	0.589358	-0.398591	0.158003	0.313377	1.50458	0.758599	0.00156707	0.16042	0.243642	1	0.00208575	0.134274	0.0717962	0.466814	4.1645e+07	6.58002e+06	3.15918e+07	9.90015e+06
RPL30	A0A1D8PM75	Ribosomal 60S subunit protein L30 OS=Candida albicans (strain SC5314 / ATCC MYA-2876) OX=237561 GN=RPL30 PE=4 SV=1	11	812	0.0566038	6	1	1	0		106	11.5	9.7	61	390.79	0	0.005	3.73	metabolic process	ribosome	structural molecule activity	Pf01248	30515273	W5Q_03792; I503_03786		86.5131	-6.88301	-2.99299	198.956	6.43485	-2.78304	-1.58159	7.6363	86.5131	0.145285	0.334115	198.956	0.0016118	0.10357	0.0613559	0.0261768	0.00518585	0.14412	0.0485198	0.099947	4020.78	347850	799956	116222
DHN6; ASR1	A0A1D8PEZ0	Asr1p OS=Candida albicans (strain SC5314 / ATCC MYA-2876) OX=237561 GN=ASR1 PE=4 SV=1	11	908	0.0337662	13	4	4	0		385	37.2	7.49	137	909.14	6.69	0	13.007					3644402	W5Q_01038		-17.5976	-100.455	34.9183	199.331	-4.1373	-6.65041	5.12591	7.63902	0.0568261	0.00995467	34.9183	199.331	0.00161454	0.113723	0.14881	0.0984408	0.00333993	0.378152	0.381392	0.375996	70587.9	4011.23	1.40703e+07	140065
CaO19.6403; CAALFM_CR08350WA; CaO19.13761	Q5A360	Nucleotide exchange factor SIL1 OS=Candida albicans (strain SC5314 / ATCC MYA-2876) OX=237561 GN=SIL1 PE=3 SV=1	21	286	0.504831	209	5	5	0		414	47	5.07	1816	16824.2	121.7	0	34.356	regulation of biological process;transport	endoplasmic reticulum;organelle lumen	enzyme regulator activity;nucleotide binding		3642082		Protein processing in endoplasmic reticulum	-23.7957	-9.22011	2.03989	-1.26519	-4.57263	-3.20478	1.02849	-0.339349	0.0420245	0.108459	2.03989	0.790398	0.00163639	0.082165	0.36253	1	0.00374131	0.131661	0.18643	0.631207	1.30107e+07	546769	1.02837e+07	1.11535e+06
RPL27A	A0A1D8PFG4	60S ribosomal protein L27 OS=Candida albicans (strain SC5314 / ATCC MYA-2876) OX=237561 GN=RPL27A PE=3 SV=1	32	578	0.154412	21	3	3	0		136	15.5	10.18	37	690.01	0	0	7.96	metabolic process	ribosome	structural molecule activity	Pf01777	30515062	W5Q_01199; I503_01209		-8.67149	-3.3931	-1.32315	-3.38147	-3.11628	-1.76261	-0.403977	-1.75765	0.11532	0.294715	0.755772	0.295729	0.00164906	0.471478	1	0.0417886	0.00256947	0.415515	0.844552	0.0367249	1.38499e+06	159718	409582	120710
CIP1	A0A1D8PPI6	Cip1p OS=Candida albicans (strain SC5314 / ATCC MYA-2876) OX=237561 GN=CIP1 PE=4 SV=1	39	224	0.702341	210	8	8	0		299	33	5.21	1030	14962.6	117.28	0	40.465	response to stimulus			Pf05368, Pf13460	3644018	I503_04672		-3.50975	-3.34068	13.6079	12.9524	-1.81137	-1.74014	3.76637	3.69515	0.28492	0.29934	13.6079	12.9524	0.0018294	0.189225	0.0315599	0.0441681	0.00165686	0.164639	0.0594331	0.0816037	5.19038e+06	1.47885e+06	6.72278e+07	2.0124e+07
PEX19	Q5A330	Pex19p OS=Candida albicans (strain SC5314 / ATCC MYA-2876) OX=237561 GN=PEX19 PE=4 SV=1	27	575	0.156627	52	7	7	0		332	37.3	4.49	363	3280.3	8.7	0	27.303	cell organization and biogenesis;transport	cytosol;endoplasmic reticulum;membrane		Pf04614	3642108	W5Q_06321; I503_06267	Peroxisome	-12.1661	-4.40651	21.3468	7.73172	-3.6048	-2.13964	4.41595	2.95079	0.0821956	0.226937	21.3468	7.73172	0.00187106	0.171949	0.000454784	0.0982351	0.00337239	0.183954	0.00100415	0.144935	1.64585e+06	135282	1.27253e+07	2.88783e+06
CAALFM_C201440CA	A0A1D8PGE0	Dynein light chain OS=Candida albicans (strain SC5314 / ATCC MYA-2876) OX=237561 GN=orf19.1448.1 PE=3 SV=1	67	63	2.48352	226	7	7	0	Acetyl [N-Term]	91	10.3	5.08	1595	14754	65.2	0	37.086				Pf01221	30515090	W5Q_01589; I503_01583		-13.6851	-5.86283	24.6049	10.541	-3.77453	-2.5516	4.62087	3.39794	0.0730724	0.170566	24.6049	10.541	0.00192234	0.0843635	0.0118267	0.0504442	0.00362797	0.107631	0.0273248	0.0857031	1.90559e+07	1.39246e+06	2.00868e+08	3.42612e+07
SUI1	Q59LQ6	Translation initiation factor eIF1 OS=Candida albicans (strain SC5314 / ATCC MYA-2876) OX=237561 GN=SUI1 PE=4 SV=1	55	138	1.18349	129	4	4	0	Acetyl [N-Term]	109	12.3	8.68	1041	11415.7	11.11	0	21.837	metabolic process		RNA binding	Pf01253	3647730	W5Q_04428; I503_04425	RNA transport	-5.58746	-2.76453	13.1442	6.50342	-2.48219	-1.46703	3.71636	2.7012	0.178972	0.361725	13.1442	6.50342	0.00197785	0.428914	0.0158875	0.145503	0.0024547	0.314616	0.0295218	0.196516	7.54797e+06	1.35088e+06	4.90876e+07	1.77562e+07
TUP1	P0CY34	Transcriptional repressor TUP1 OS=Candida albicans (strain SC5314 / ATCC MYA-2876) OX=237561 GN=TUP1 PE=2 SV=1	30	300	0.476562	244	15	15	0		512	57.6	6	1313	15427.2	68.81	0	57.036	cell communication;metabolic process;regulation of biological process;response to stimulus		protein binding	Pf00400, Pf04762, Pf08581	3639369	W5Q_00004; I503_00005	Cell cycle - yeast; MAPK signaling pathway - yeast	-2.74215	-4.34297	1.41174	2.2359	-1.45531	-2.11868	0.497478	1.16085	0.364678	0.230257	1.41174	2.2359	0.00199382	0.137911	0.620165	0.457285	0.00145081	0.146095	0.154259	0.265421	1.08034e+07	3.93977e+06	2.41554e+07	5.56195e+06
DJP1	A0A1D8PEX2	Djp1p OS=Candida albicans (strain SC5314 / ATCC MYA-2876) OX=237561 GN=DJP1 PE=4 SV=1	7	829	0.0511811	26	3	3	0		508	57.5	5.08	179	1981.19	1.92	0	13.268	cell organization and biogenesis			Pf00226, Pf14308	3647186			-46.4628	-3.36975	20.6781	1.49969	-5.53801	-1.75264	4.37003	0.584668	0.0215226	0.296758	20.6781	1.49969	0.00202551	0.0647578	0.000308949	1	0.00560863	0.0567487	0.000675059	0.313895	1.01303e+06	21803.1	1.51924e+06	450845
PIN3	Q5ANE7	Pin3p OS=Candida albicans (strain SC5314 / ATCC MYA-2876) OX=237561 GN=PIN3 PE=4 SV=1	40	211	0.757895	216	9	9	0	Acetyl [N-Term]	285	31	5.48	1150	13554.4	73.87	0	42.016			protein binding	Pf00018, Pf07653, Pf14604	3635228	W5Q_02997; I503_02991		-6.62509	-1.33027	10.1634	2.04073	-2.72794	-0.411716	3.34531	1.02909	0.150941	0.751729	10.1634	2.04073	0.00219047	1	0.00225808	0.538253	0.00298773	0.582556	0.00377699	0.276955	1.81981e+07	2.74685e+06	3.71374e+07	2.79173e+07
AAT2; AAT21	Q59N40	Aspartate aminotransferase OS=Candida albicans (strain SC5314 / ATCC MYA-2876) OX=237561 GN=AAT21 PE=4 SV=1	39	435	0.269231	112	11	11	0		416	46	8.69	448	6504.71	21.61	0	43.458	metabolic process		catalytic activity	Pf00155	3647241	W5Q_06214; I503_06169	Phenylalanine metabolism; Arginine biosynthesis; Carbon metabolism; Phenylalanine, tyrosine and tryptophan biosynthesis; 2-Oxocarboxylic acid metabolism; Biosynthesis of secondary metabolites; Tyrosine metabolism; Metabolic pathways; Alanine, aspartate and glutamate metabolism; Cysteine and methionine metabolism; Arginine and proline metabolism; Biosynthesis of antibiotics; Biosynthesis of amino …	-6.22486	-3.57024	15.651	8.97656	-2.63804	-1.83602	3.96818	3.16616	0.160646	0.280093	15.651	8.97656	0.00226212	0.167936	0.0159224	0.0580225	0.00298378	0.154167	0.0315915	0.0918543	3.0072e+06	483095	2.69943e+07	7.56093e+06
SSA2	P46587	Heat shock protein SSA2 OS=Candida albicans (strain SC5314 / ATCC MYA-2876) OX=237561 GN=SSA2 PE=1 SV=4	69	42	3.49922	2257	38	17	0		645	70	5.06	21954	214157	1377.69	0	306.238	response to stimulus;transport	cell surface;cytoplasm;extracellular;membrane	nucleotide binding	Pf00012, Pf06723	3644711		Spliceosome; Endocytosis; Protein processing in endoplasmic reticulum; Longevity regulating pathway - multiple species	-3.8563	-4.00977	3.89681	4.05189	-1.94722	-2.00352	1.9623	2.0186	0.259316	0.249391	3.89681	4.05189	0.00229401	0.309013	0.119333	0.301249	0.00223347	0.309557	0.117083	0.304051	6.60682e+07	1.71325e+07	2.67701e+08	6.67623e+07
MDH3; MDH1-3	Q5A5S6	Malate dehydrogenase OS=Candida albicans (strain SC5314 / ATCC MYA-2876) OX=237561 GN=MDH1-3 PE=3 SV=1	48	209	0.77193	264	10	10	0		342	35.8	7.53	1987	18576.5	107.28	0	60.822	metabolic process		catalytic activity	Pf00056, Pf02866	3641197	W5Q_02465; I503_02469	Biosynthesis of secondary metabolites; Metabolic pathways; Cysteine and methionine metabolism; Citrate cycle (TCA cycle); Glyoxylate and dicarboxylate metabolism; Carbon metabolism; Pyruvate metabolism; Biosynthesis of antibiotics	-7.87753	-1.28497	67.1254	10.9494	-2.97774	-0.36173	6.06879	3.45277	0.126943	0.778231	67.1254	10.9494	0.00230794	1	0.00281646	0.0390374	0.00343623	0.606878	0.00854626	0.0673937	2.61228e+06	331611	2.86028e+07	2.22595e+07
WH11	A0A1D8PHF8	Wh11p OS=Candida albicans (strain SC5314 / ATCC MYA-2876) OX=237561 GN=WH11 PE=4 SV=1	46	405	0.307692	20	3	3	0		65	7	5.15	166	1181.15	5.4	0	9.937	response to stimulus	cytoplasm;membrane;nucleus		Pf04119	30515117	W5Q_01949; I503_01963		-32.593	-25.0157	7.95341	6.10437	-5.02649	-4.64476	2.99157	2.60984	0.0306814	0.039975	7.95341	6.10437	0.00267801	0.149399	0.279008	0.311157	0.0067305	0.34696	0.417336	0.406035	2.28724e+06	70175.9	1.39622e+07	558137
GCV3	Q5AKX1	Glycine cleavage system H protein OS=Candida albicans (strain SC5314 / ATCC MYA-2876) OX=237561 GN=GCV3 PE=3 SV=1	67	199	0.80791	143	8	8	0		177	20	4.81	751	7693.53	20.18	0	39.166	metabolic process	mitochondrion		Pf01597	3636194	W5Q_01321; I503_01353	Biosynthesis of secondary metabolites; Metabolic pathways; Glycine, serine and threonine metabolism; Glyoxylate and dicarboxylate metabolism; Biosynthesis of antibiotics	-8.87669	-15.5002	25.3646	44.2907	-3.15002	-3.95421	4.66474	5.46893	0.112655	0.0645155	25.3646	44.2907	0.00280781	0.186016	0.0945962	0.127451	0.00442233	0.367774	0.220634	0.348512	6.30083e+06	709817	2.79069e+08	1.80042e+07
CDC10	P39827	Cell division control protein 10 OS=Candida albicans (strain SC5314 / ATCC MYA-2876) OX=237561 GN=CDC10 PE=2 SV=2	5	942	0.0280112	10	1	1	0		357	40.7	7.11	61	714.93	2.17	0.002	5.792	cell differentiation;cell division;cell organization and biogenesis;reproduction	cytoskeleton	nucleotide binding	Pf00735, Pf01926, Pf04548, Pf04670	3640947	W5Q_05887; I503_05869		-9.37311	-4.7988	8.4226	4.31216	-3.22853	-2.26267	3.07427	2.10841	0.106688	0.208386	8.4226	4.31216	0.00297213	0.153481	0.00186506	0.174898	0.0047978	0.173639	0.00286684	0.184379	252627	26952.3	1.08937e+06	227008
KRE9	Q5ANN9	Kre9p OS=Candida albicans (strain SC5314 / ATCC MYA-2876) OX=237561 GN=KRE9 PE=4 SV=1	24	412	0.295203	80	4	4	0		271	29.1	8.18	658	5715.69	34.32	0	32.345	metabolic process;response to stimulus			Pf05390, Pf10342	3635183	W5Q_02928; I503_02922		-7.69462	-7.86442	10.2489	10.4751	-2.94385	-2.97534	3.3574	3.38889	0.129961	0.127155	10.2489	10.4751	0.00298001	0.230453	0.13048	0.192209	0.00438635	0.342839	0.219036	0.325688	1.13795e+07	1.47889e+06	1.19201e+08	1.5157e+07
CaO19.6348; CAALFM_C112740WA	A0A1D8PFI5	Uncharacterized protein OS=Candida albicans (strain SC5314 / ATCC MYA-2876) OX=237561 GN=orf19.6348 PE=4 SV=1	2	1077	0.00638298	6	2	2	0		940	107.2	7.34	58	315.97	1.99	0.002	4.792				Pf00443, Pf13423	3646819			-16.3	-72.9317	37.1748	166.332	-4.0268	-6.18847	5.21625	7.37792	0.0613496	0.0137115	37.1748	166.332	0.00305682	0.122669	0.143478	0.101978	0.00615461	0.379569	0.374208	0.376192	27098.3	1662.47	4.50732e+06	61801.9
ZPR1	Q5A934	Zinc finger-containing protein OS=Candida albicans (strain SC5314 / ATCC MYA-2876) OX=237561 GN=ZPR1 PE=4 SV=1	17	463	0.231827	118	6	6	0		509	57	4.84	1428	9101.04	73.07	0	37.002			metal ion binding	Pf03367	3640177	I503_00108		-9.44683	-3.07992	26.8295	8.74715	-3.23983	-1.62289	4.74575	3.12881	0.105856	0.324684	26.8295	8.74715	0.00309971	0.320695	0.0295475	0.0965253	0.00502127	0.260227	0.0701125	0.151005	3.32841e+06	352330	2.91141e+07	9.45286e+06
CaO19.10405; CaO19.2887; CAALFM_C406470WA	A0A1D8PMK4	Uncharacterized protein OS=Candida albicans (strain SC5314 / ATCC MYA-2876) OX=237561 GN=orf19.2887 PE=4 SV=1	12	717	0.08867	18	2	2	0		203	23	8.32	115	981.23	4.2	0	6.946				Pf10295	3642790	I503_03960		-110.136	-2.2281	1235.7	24.9989	-6.78314	-1.15581	10.2711	4.64379	0.00907972	0.448814	1235.7	24.9989	0.0031283	0.335277	0.00152072	0.0207969	0.0106099	0.193759	0.00780974	0.0482883	183097	1662.47	4.57722e+06	2.05432e+06
PDX1	Q5AKV6	Pdx1p OS=Candida albicans (strain SC5314 / ATCC MYA-2876) OX=237561 GN=PDX1 PE=4 SV=1	37	558	0.165468	69	10	10	0		417	46	5.44	265	3500.27	6.22	0	31.781	metabolic process		catalytic activity	Pf00364, Pf02817	3636128	W5Q_01336; I503_01368		-4.61142	-3.92796	11.714	9.97783	-2.20521	-1.97378	3.55016	3.31873	0.216853	0.254585	11.714	9.97783	0.00314227	0.308943	0.0392802	0.135353	0.00346468	0.304893	0.0697255	0.2246	1.03135e+06	223651	1.02906e+07	2.61984e+06
PHM7	A0A1D8PI19	Phm7p OS=Candida albicans (strain SC5314 / ATCC MYA-2876) OX=237561 GN=PHM7 PE=4 SV=1	13	355	0.374326	347	8	8	0		927	104.3	8.81	3548	26027.4	178.93	0	61.932		membrane		Pf02714, Pf12621, Pf13967, Pf14703	3642329			-10.1564	-1.79808	39.3298	6.96291	-3.34431	-0.846454	5.29755	2.79969	0.0984603	0.55615	39.3298	6.96291	0.00322438	1	0.0207109	0.116351	0.00539168	0.457295	0.0548585	0.162873	2.2364e+07	2.20197e+06	1.55719e+08	8.6603e+07
CDC11	G1UB61	Septin CDC11 OS=Candida albicans (strain SC5314 / ATCC MYA-2876) OX=237561 GN=CDC11 PE=1 SV=1	22	645	0.119403	48	7	7	0		402	46.7	5.07	194	2458.63	2.09	0	21.27	cell differentiation;cell division;cell organization and biogenesis;reproduction	cytoskeleton	catalytic activity;nucleotide binding	Pf00005, Pf00735, Pf01926	3647888	W5Q_04044; I503_04042		-10.089	-2.49206	10.0163	2.47411	-3.33471	-1.31734	3.32428	1.30691	0.0991179	0.401274	10.0163	2.47411	0.00325684	0.486786	0.0335054	0.477385	0.00543031	0.320631	0.0556906	0.311949	984331	97564.8	2.43534e+06	977238
CPY3; PRC2	A0A1D8PN69	Carboxypeptidase OS=Candida albicans (strain SC5314 / ATCC MYA-2876) OX=237561 GN=PRC2 PE=3 SV=1	8	949	0.0261044	13	2	2	0		498	56.3	4.93	44	732.63	0	0	7.241	metabolic process		catalytic activity	Pf00450	3647044			-73.247	-31.1246	-1.22185	-2.87543	-6.1947	-4.95998	-0.289062	-1.52378	0.0136524	0.0321289	0.818434	0.347774	0.00325845	0.155829	1	0.242528	0.0100926	0.386453	0.854186	0.184779	1.64613e+06	22473.7	572482	18393.2
NCR1	A0A1D8PFW9	Sphingolipid transporter OS=Candida albicans (strain SC5314 / ATCC MYA-2876) OX=237561 GN=NCR1 PE=4 SV=1	2	1009	0.0159236	20	1	1	0		1256	141	5.76	61	887.71	0	0.003	4.167		membrane	transporter activity	Pf02460, Pf12349	3643314	W5Q_01382; I503_01414		-56.5547	1.18591	476.4	7.10315	-5.82157	0.245997	8.89603	2.82846	0.017682	1.18591	476.4	7.10315	0.00331329	1	0.0104732	0.00372927	0.00964428	0.69632	0.0465847	0.00527405	785606	13891.1	5.58028e+06	6.61772e+06
SSP120; CAALFM_C501980CA	A0A1D8PNB9	Uncharacterized protein OS=Candida albicans (strain SC5314 / ATCC MYA-2876) OX=237561 GN=orf19.3173 PE=4 SV=1	27	336	0.39823	90	4	4	0		226	26.3	5.96	366	5008.22	25.27	0	16.975					3643775			-10.343	-6.14426	1.54027	-1.0929	-3.37058	-2.61924	0.623182	-0.128162	0.0966837	0.162753	1.54027	0.914997	0.0033471	0.00989822	0.162912	1	0.00564085	0.0129629	0.0507618	0.745436	9.94224e+06	961252	9.09711e+06	1.48059e+06
CaO19.1785; CAALFM_C209980WA	A0A1D8PIK6	Uncharacterized protein OS=Candida albicans (strain SC5314 / ATCC MYA-2876) OX=237561 GN=orf19.1785 PE=4 SV=1	54	265	0.56	182	12	12	0		325	35.7	4.88	1182	11312.5	48.2	0	64.041				Pf08577, Pf11566	3643965			-3.9326	-13.4161	16.8859	57.6066	-1.97548	-3.7459	4.07775	5.84816	0.254285	0.0745371	16.8859	57.6066	0.00338039	0.133861	0.0265633	0.0776456	0.00333895	0.250715	0.0541591	0.227042	2.53704e+06	645130	1.4615e+08	1.08936e+07
CAALFM_C304810CA	A0A1D8PK71	Uncharacterized protein OS=Candida albicans (strain SC5314 / ATCC MYA-2876) OX=237561 GN=orf19.5943.1 PE=4 SV=1	45	142	1.14607	306	11	11	0		267	29.1	9.14	2851	22198.4	140.6	0	59.409				Pf09598	30515205	W5Q_02990; I503_02984		-3.91792	-2.63299	1.33676	-1.11315	-1.97009	-1.3967	0.418741	-0.154646	0.255238	0.379797	1.33676	0.898353	0.00339548	0.0309292	1	1	0.0033447	0.0215994	0.316909	0.598806	3.74023e+07	9.54646e+06	3.36004e+07	1.27613e+07
HSP70	P41797	Heat shock protein SSA1 OS=Candida albicans (strain SC5314 / ATCC MYA-2876) OX=237561 GN=SSA1 PE=1 SV=2	77	56	2.87652	1887	40	18	23		656	70.3	5.17	19638	183941	1267.07	0	318.153	cell organization and biogenesis;regulation of biological process;response to stimulus	cell surface;cytoplasm;cytosol;extracellular;membrane	nucleotide binding	Pf00012, Pf06723	3636229	W5Q_01302; I503_01334	Protein processing in endoplasmic reticulum; Spliceosome; Endocytosis; Longevity regulating pathway - multiple species	-2.51688	-3.05799	4.18685	5.08699	-1.33164	-1.61258	2.06586	2.34681	0.397317	0.327012	4.18685	5.08699	0.00349158	0.470485	0.0465317	0.25601	0.00232476	0.379348	0.0480641	0.300404	1.53557e+08	6.1011e+07	7.81145e+08	2.55444e+08
PDI1	A0A1D8PR99	Protein disulfide isomerase OS=Candida albicans (strain SC5314 / ATCC MYA-2876) OX=237561 GN=PDI1 PE=4 SV=1	52	57	2.83721	1586	30	30	0		559	62.9	4.75	13998	115582	741.77	0	226.462	cellular homeostasis;regulation of biological process	cell surface;endoplasmic reticulum;extracellular	catalytic activity	Pf00085, Pf13098, Pf13848	3641367		Protein processing in endoplasmic reticulum	-10.0211	-2.99948	3.71541	1.11208	-3.32497	-1.58471	1.89352	0.153263	0.0997892	0.333391	3.71541	1.11208	0.00351929	0.330583	0.0187232	1	0.00585078	0.26194	0.0177264	0.858186	4.75777e+08	4.74774e+07	5.29103e+08	1.76398e+08
CaO19.8442; CaO19.822; HSP21	Q5AHH4	Small heat shock protein 21 OS=Candida albicans (strain SC5314 / ATCC MYA-2876) OX=237561 GN=HSP21 PE=1 SV=1	47	155	1.08995	206	8	8	0	Acetyl [N-Term]	189	21.5	5.35	1172	15636.7	79.93	0	39.817	metabolic process;response to stimulus	cell surface		Pf00011	3637364	W5Q_01833		-11.1148	-6.32882	13.5363	7.70762	-3.47441	-2.66194	3.75876	2.94628	0.0899699	0.158007	13.5363	7.70762	0.00355273	0.192721	0.00018537	0.165335	0.00617183	0.256506	0.000348381	0.243561	1.16138e+07	1.04489e+06	8.95145e+07	1.41439e+07
ABP1	Q5AFA8	Abp1p OS=Candida albicans (strain SC5314 / ATCC MYA-2876) OX=237561 GN=ABP1 PE=4 SV=1	37	187	0.841049	545	21	21	0		648	70.6	4.81	3416	34170.8	187.53	0	115.513			protein binding	Pf00018, Pf00241, Pf07653, Pf14604	3637875	W5Q_03581; I503_03593		-5.66368	-5.01017	15.6962	13.885	-2.50174	-2.32486	3.97234	3.79546	0.176564	0.199594	15.6962	13.885	0.0037824	0.216255	0.00146777	0.102732	0.00473129	0.251381	0.00291523	0.194957	2.06886e+07	3.65285e+06	2.87262e+08	5.73357e+07
MNN22; MNN24	Q5AD72	Alpha-1,2-mannosyltransferase MNN24 OS=Candida albicans (strain SC5314 / ATCC MYA-2876) OX=237561 GN=MNN24 PE=3 SV=1	5	825	0.0521862	37	2	2	0		709	83	5.96	251	2799.27	23.89	0	10.153	metabolic process	Golgi;membrane	catalytic activity	Pf11051	3638789		Metabolic pathways; Various types of N-glycan biosynthesis	-12.8708	-9.37905	-1.783	-2.4468	-3.68602	-3.22944	-0.83431	-1.29089	0.0776955	0.106621	0.560851	0.408698	0.00383364	0.0460071	0.34185	0.102845	0.00706545	0.0742886	0.142604	0.0663811	3.80641e+06	295741	1.55567e+06	165867
CaO19.2070; CAALFM_C200570WA	A0A1D8PG45	Uncharacterized protein OS=Candida albicans (strain SC5314 / ATCC MYA-2876) OX=237561 GN=orf19.2070 PE=4 SV=1	14	481	0.22007	125	6	6	0		568	63.9	7.17	730	7764.34	27.96	0	25.208			protein binding	Pf00439	3638853	W5Q_01503		-6.2656	-3.04414	20.1178	9.77421	-2.64745	-1.60603	4.3304	3.28898	0.159602	0.3285	20.1178	9.77421	0.00387246	0.214487	0.00193501	0.0540706	0.00512607	0.172237	0.00418968	0.0889185	2.17709e+06	347467	2.12793e+07	6.99026e+06
GDA1	Q8TGH6	Guanosine-diphosphatase OS=Candida albicans (strain SC5314 / ATCC MYA-2876) OX=237561 GN=GDA1 PE=3 SV=1	24	359	0.367279	220	9	9	0		599	65.9	5.94	1711	16898.6	105.3	0	53.761	metabolic process;regulation of biological process;response to stimulus	Golgi;membrane	catalytic activity	Pf01150	3641762	W5Q_03119; I503_03113		-5.52217	-4.51992	-1.59053	-1.94322	-2.46523	-2.1763	-0.669509	-0.958446	0.181088	0.221243	0.628721	0.514611	0.00389329	0.0809644	1	0.194813	0.00479893	0.0881013	0.336705	0.0933591	2.15158e+07	3.89626e+06	1.10723e+07	2.44966e+06
ADE17	Q5A6R2	Bifunctional phosphoribosylaminoimidazolecarboxamide formyltransferase/IMP cyclohydrolase OS=Candida albicans (strain SC5314 / ATCC MYA-2876) OX=237561 GN=ADE17 PE=3 SV=1	52	216	0.746622	442	20	20	0		592	64.9	6.55	3409	34819.1	230.37	0	112.561	metabolic process		catalytic activity	Pf01808, Pf02142	3641024	W5Q_05840; I503_05822	Purine metabolism; Metabolic pathways; One carbon pool by folate; Biosynthesis of antibiotics; Biosynthesis of secondary metabolites	-4.36031	-1.72938	7.47355	2.96414	-2.12443	-0.790253	2.90179	1.56762	0.229341	0.578243	7.47355	2.96414	0.00398295	1	0.00376471	0.384755	0.00423076	0.49677	0.00546221	0.301574	1.62411e+07	3.72477e+06	4.81411e+07	2.78372e+07
COX6	A0A1D8PH08	Cytochrome c oxidase subunit VI OS=Candida albicans (strain SC5314 / ATCC MYA-2876) OX=237561 GN=COX6 PE=4 SV=1	29	270	0.54	81	5	5	0		150	17.4	5.66	555	4497.74	6.4	0	20.775	metabolic process;transport	membrane	catalytic activity;transporter activity	Pf02284	30515099	W5Q_01782		-4.70294	-1.20733	10.652	2.73456	-2.23356	-0.271818	3.41306	1.45131	0.212633	0.828275	10.652	2.73456	0.00399051	1	0.000662953	0.379733	0.00445653	0.752435	0.00113135	0.275555	2.40531e+06	511448	6.57748e+06	5.44796e+06
OSM1; OSM2	Q5AKX2	Fumarate reductase OS=Candida albicans (strain SC5314 / ATCC MYA-2876) OX=237561 GN=OSM2 PE=4 SV=1	15	587	0.149691	97	5	5	0	Acetyl [N-Term]	648	70.4	7.85	498	4756.2	8.59	0	17.612	metabolic process		catalytic activity;metal ion binding;nucleotide binding	Pf00173, Pf00890, Pf01266, Pf01494, Pf03486, Pf07992, Pf12831, Pf13450	3636193	W5Q_01320; I503_01352		-3.25154	-1.34556	10.6048	4.38852	-1.70112	-0.428211	3.40665	2.13374	0.307546	0.743183	10.6048	4.38852	0.0041145	0.790255	0.0039403	0.000741911	0.00349964	0.169198	0.00671161	0.000791521	1.34025e+06	412188	5.8817e+06	4.37118e+06
VMA8	P87220	V-type proton ATPase subunit D OS=Candida albicans (strain SC5314 / ATCC MYA-2876) OX=237561 GN=VMA8 PE=3 SV=1	27	636	0.123596	33	4	4	0		267	30	5.85	235	2167.22	12.43	0	16.038	transport		catalytic activity;transporter activity	Pf01813	3642798	W5Q_03928; I503_03953	Metabolic pathways; Phagosome; Oxidative phosphorylation	-90.1329	-2.45566	100.185	2.72954	-6.49398	-1.29611	6.64653	1.44866	0.0110947	0.407223	100.185	2.72954	0.00414811	0.100336	1.1485e-05	0.0880342	0.0134689	0.0650234	3.81677e-05	0.0637657	1.15867e+06	12855.1	3.16264e+06	1.2879e+06
CaO19.2256; CAALFM_C207000WA	A0A1D8PHS4	Uncharacterized protein OS=Candida albicans (strain SC5314 / ATCC MYA-2876) OX=237561 GN=orf19.2256 PE=4 SV=1	50	691	0.1	23	6	6	0		230	26.1	4.72	105	1335.44	0	0	19.068			protein binding	Pf00023, Pf12796, Pf13606, Pf13637, Pf13857	3643534			-4.1081	-4.35833	7.91353	8.39555	-2.03847	-2.12377	2.98432	3.06963	0.243422	0.229446	7.91353	8.39555	0.00426842	0.333415	0.0139908	0.193014	0.00435052	0.354049	0.0208766	0.296241	562508	136927	4.72257e+06	1.08357e+06
TEF4; CAM1	A0A1D8PKC3	Translation elongation factor EF1B gamma OS=Candida albicans (strain SC5314 / ATCC MYA-2876) OX=237561 GN=CAM1 PE=4 SV=1	17	468	0.228155	94	5	5	0		412	47	8.38	275	5522.3	15.59	0	20.128	metabolic process		protein binding;RNA binding	Pf00043, Pf00647, Pf13410, Pf14497	3641734	W5Q_03108; I503_03102		-2.5108	-2.03016	7.07012	5.71669	-1.32815	-1.02159	2.82173	2.51518	0.398279	0.492572	7.07012	5.71669	0.00445331	0.102906	0.000435827	0.00833365	0.00295733	0.0525642	0.000614895	0.0104803	4.58015e+06	1.82418e+06	2.61833e+07	1.28971e+07
CaO19.9452; SSC1	P83784	Heat shock protein SSC1, mitochondrial OS=Candida albicans (strain SC5314 / ATCC MYA-2876) OX=237561 GN=SSC1 PE=1 SV=2	49	185	0.847222	549	24	24	0		648	69.7	5.6	4457	39360.9	211.9	0	147.775	cell organization and biogenesis;metabolic process	cell surface;membrane;mitochondrion;organelle lumen	catalytic activity;nucleotide binding;protein binding	Pf00012, Pf02841, Pf06723	3645232	W5Q_02158	RNA degradation	-2.98834	-4.26577	4.42921	6.32257	-1.57934	-2.09281	2.14705	2.66051	0.334634	0.234424	4.42921	6.32257	0.00457377	0.309408	0.0979737	0.211013	0.00361178	0.323765	0.105177	0.280701	1.94256e+07	6.50047e+06	1.2282e+08	2.87919e+07
YFH1	Q59PA3	Ferroxidase OS=Candida albicans (strain SC5314 / ATCC MYA-2876) OX=237561 GN=YFH1 PE=4 SV=1	24	191	0.830508	147	3	3	0		177	19.8	4.91	1276	11435.3	117.7	0	20.883	cell organization and biogenesis;metabolic process;response to stimulus	mitochondrion	catalytic activity;metal ion binding	Pf01491	3646853	W5Q_03737; I503_03731	Porphyrin and chlorophyll metabolism	-7.60788	-8.088	10.306	10.9564	-2.92749	-3.01578	3.36541	3.4537	0.131443	0.12364	10.306	10.9564	0.00458625	0.154251	6.57093e-05	0.126725	0.00671311	0.232593	0.000110569	0.218835	4.32487e+06	568473	4.73849e+07	5.85867e+06
YVC1	Q5A2J7	Calcium channel YVC1 OS=Candida albicans (strain SC5314 / ATCC MYA-2876) OX=237561 GN=YVC1 PE=2 SV=2	2	928	0.0296296	20	1	1	0		675	77.3	5.08	111	1116.78	6.04	0.003	4.129	cellular homeostasis;transport	membrane;vacuole	transporter activity		3642303			-9.71542	-2.34766	13.7992	3.33448	-3.28028	-1.23122	3.78652	1.73746	0.102929	0.425956	13.7992	3.33448	0.0046582	0.394804	0.0142097	0.184672	0.00764009	0.243046	0.0269027	0.16043	815201	83908	2.71827e+06	1.15786e+06
CAALFM_CR00430CA	A0A1D8PRQ4	Uncharacterized protein OS=Candida albicans (strain SC5314 / ATCC MYA-2876) OX=237561 GN=CAALFM_CR00430CA PE=3 SV=1	56	198	0.808989	72	5	5	0	Acetyl [N-Term]	89	9.6	6.77	408	4319.68	18.02	0	19.31				Pf01722	30515366	W5Q_05508; I503_05472		-5.82707	-1.46915	4.48463	1.13068	-2.54277	-0.554977	2.16499	0.177196	0.171613	0.680668	4.48463	1.13068	0.0047318	1	0.0463226	1	0.00601594	0.529926	0.0501439	0.808247	6.42089e+06	1.10191e+06	7.25999e+06	4.94164e+06
CaO19.4089; SGT1	A0A1D8PIG5	Co-chaperone OS=Candida albicans (strain SC5314 / ATCC MYA-2876) OX=237561 GN=SGT1 PE=4 SV=1	8	889	0.0363196	15	2	2	0		413	47.3	5.06	23	707.62	2.28	0	5.985	response to stimulus		protein binding	Pf04969, Pf05002, Pf13414, Pf13424, Pf13432	3644068	W5Q_02348		-7.54473	-2.61722	5.23109	1.81464	-2.91547	-1.38804	2.38711	0.85968	0.132543	0.382084	5.23109	1.81464	0.0047451	0.0384855	0.0393931	0.137444	0.0069171	0.0267097	0.0470179	0.0590791	594677	78820.2	1.07912e+06	412316
MLC1	A0A1D8PSE1	Mlc1p OS=Candida albicans (strain SC5314 / ATCC MYA-2876) OX=237561 GN=MLC1 PE=4 SV=1	87	21	5.29371	757	13	13	0		143	16	4.82	4247	49340.8	273.23	0	101.696			metal ion binding	Pf13405, Pf13499, Pf13833, Pf14658	30515387	W5Q_05753; I503_05721		-9.22781	-2.73629	17.6742	5.24085	-3.20599	-1.45222	4.14357	2.3898	0.108368	0.365459	17.6742	5.24085	0.0048962	0.411047	0.00265435	0.167975	0.00784858	0.298465	0.00549924	0.200714	1.44879e+08	1.57002e+07	7.59289e+08	2.77489e+08
CPY2; PRC3	A0A1D8PDM9	Carboxypeptidase OS=Candida albicans (strain SC5314 / ATCC MYA-2876) OX=237561 GN=PRC3 PE=3 SV=1	22	537	0.18	99	5	5	0		550	61.9	4.77	470	6931.92	51.61	0	41.24	metabolic process		catalytic activity	Pf00450	3639889	I503_00564		-23.1151	-7.0304	1.61739	-2.03283	-4.53076	-2.81361	0.693666	-1.02349	0.0432618	0.142239	1.61739	0.491926	0.00491712	0.00516895	0.382853	0.178694	0.0111392	0.00727169	0.132786	0.0914457	8.54791e+06	369798	4.20494e+06	598108
SCP160; CAALFM_C111860WA	A0A1D8PF90	Uncharacterized protein OS=Candida albicans (strain SC5314 / ATCC MYA-2876) OX=237561 GN=orf19.5281 PE=4 SV=1	26	445	0.252459	308	23	23	0		1220	133.9	6.16	1225	17603	60.6	0	88.268			RNA binding	Pf00013, Pf13014	3642009			-4.01397	-2.77901	5.59574	3.87412	-2.00503	-1.47457	2.48433	1.95387	0.24913	0.359841	5.59574	3.87412	0.00505519	0.300923	0.0343922	0.165374	0.00506791	0.221866	0.0427208	0.16156	1.08576e+07	2.70496e+06	4.20637e+07	1.51363e+07
CMP66; SCW4	Q5AIB2	Scw4p OS=Candida albicans (strain SC5314 / ATCC MYA-2876) OX=237561 GN=SCW4 PE=3 SV=1	12	554	0.16782	97	4	4	0		578	57.5	4.87	1072	8612.39	69.04	0	25.782	metabolic process		catalytic activity	Pf00332	3636797	W5Q_00243; I503_00242		-7.66042	-2.82792	5.21878	1.92657	-2.93742	-1.49974	2.38371	0.946032	0.130541	0.353617	5.21878	1.92657	0.00519739	0.269146	0.0110877	0.685128	0.00763346	0.201825	0.0132149	0.324076	3.92694e+06	512627	7.56551e+06	2.67529e+06
SUP35	Q59YE8	Translation termination factor GTPase eRF3 OS=Candida albicans (strain SC5314 / ATCC MYA-2876) OX=237561 GN=SUP35 PE=4 SV=1	4	1005	0.0166436	12	3	3	0		721	79.9	8.35	97	651.37	1.63	0	11.426	cell organization and biogenesis;metabolic process	ribosome	catalytic activity;nucleotide binding;RNA binding	Pf00009, Pf03143, Pf03144	3643785		mRNA surveillance pathway	-13.1496	-162.451	5.71953	70.6591	-3.71695	-7.34386	2.5159	6.1428	0.0760477	0.00615571	5.71953	70.6591	0.0052024	0.10248	0.33793	0.123645	0.00966853	0.376299	0.425098	0.379762	49714.7	3780.69	3.5128e+06	21623.8
TAF14	A0A1D8PH31	TATA-binding protein-associated factor OS=Candida albicans (strain SC5314 / ATCC MYA-2876) OX=237561 GN=TAF14 PE=4 SV=1	65	52	2.98479	785	12	12	0		263	29.1	6.9	4383	64645.3	429.78	0	123.37	regulation of biological process	nucleus		Pf03366	3637357	W5Q_01854; I503_01870		-7.3136	-2.44157	51.676	17.2515	-2.87058	-1.28781	5.69142	4.10865	0.136731	0.409572	51.676	17.2515	0.0052571	0.524693	0.000881879	0.0758328	0.00754547	0.337852	0.00250957	0.155785	2.69e+07	3.67808e+06	4.64066e+08	1.90068e+08
CaO19.4127; CAALFM_C204850CA	A0A1D8PH89	Uncharacterized protein OS=Candida albicans (strain SC5314 / ATCC MYA-2876) OX=237561 GN=orf19.4127 PE=4 SV=1	7	945	0.0271493	12	3	3	0		442	47	9.28	108	783.23	1.94	0	9.253			protein binding	Pf00018, Pf04366, Pf07653, Pf14604	3648114	W5Q_01916		-3.95019	-4.06233	5.17514	5.32205	-1.98192	-2.02231	2.3716	2.41198	0.253152	0.246164	5.17514	5.32205	0.00551046	0.438221	0.0642991	0.339811	0.00546066	0.443109	0.0762457	0.409809	348561	88239	1.85506e+06	456649
RDI1	Q5AND4	Rdi1p OS=Candida albicans (strain SC5314 / ATCC MYA-2876) OX=237561 GN=RDI1 PE=4 SV=1	85	29	4.52217	918	20	20	0		203	22.9	5.29	6233	63121.1	403.11	0	116.618	cell communication;regulation of biological process;response to stimulus	cytoplasm	enzyme regulator activity	Pf02115	3635167	W5Q_03009; I503_03003		-7.94942	-4.96166	16.8854	10.5391	-2.99085	-2.31082	4.0777	3.39768	0.125795	0.201545	16.8854	10.5391	0.00558668	0.255055	0.0172595	0.142606	0.00835446	0.294694	0.0351895	0.242265	1.13903e+08	1.43284e+07	1.20043e+09	2.41941e+08
BIK1; CAALFM_C307770CA	A0A1D8PKW0	Uncharacterized protein (Fragment) OS=Candida albicans (strain SC5314 / ATCC MYA-2876) OX=237561 GN=orf19.6170 PE=4 SV=1	13	403	0.30897	93	3	3	0		301	33.9	4.79	843	6772.96	50.07	0	17.086				Pf00529, Pf01302, Pf01496, Pf01576, Pf02463, Pf02841, Pf04111, Pf05557, Pf05622, Pf05667, Pf05852, Pf06160, Pf07888, Pf09731, Pf10186, Pf11382, Pf12004, Pf12128, Pf13166, Pf13514, Pf13654, Pf14362	3647457			-5.18632	-1.07963	52.6678	10.9638	-2.37471	-0.11054	5.71885	3.45468	0.192815	0.926241	52.6678	10.9638	0.00561887	1	0.00190479	0.0502621	0.00667159	0.873622	0.00544659	0.0868197	1.33331e+06	257082	1.46182e+07	1.354e+07
CYP1; CaJ7_0279	P22011	Peptidyl-prolyl cis-trans isomerase OS=Candida albicans (strain SC5314 / ATCC MYA-2876) OX=237561 GN=CYP1 PE=3 SV=1	56	15	7.35802	1192	11	10	1	Acetyl [N-Term]	162	17.6	7.97	11861	89197.4	538.14	0	79.843	metabolic process	cytoplasm	catalytic activity	Pf00160	3636978	W5Q_05281; I503_05240		-3.61833	-3.59814	3.53195	3.51225	-1.85532	-1.84725	1.82046	1.81239	0.276371	0.277921	3.53195	3.51225	0.00638806	0.481915	0.252098	0.489672	0.00592595	0.445109	0.229468	0.443739	4.03535e+08	1.11525e+08	1.41731e+09	3.93901e+08
SEC31; PGA63	Q5AAU3	Protein transport protein SEC31 OS=Candida albicans (strain SC5314 / ATCC MYA-2876) OX=237561 GN=PGA63 PE=3 SV=2	21	331	0.406324	514	20	20	0		1265	136.2	6.77	3226	44078.1	286.78	0	127.45	transport	cytoskeleton;endoplasmic reticulum;membrane	protein binding;structural molecule activity	Pf00400, Pf03154, Pf04652, Pf07223, Pf10349, Pf15279, Pf15449	3639524	W5Q_00672	Protein processing in endoplasmic reticulum	-10.978	-2.19587	76.5232	15.3065	-3.45655	-1.13479	6.25783	3.93607	0.0910909	0.4554	76.5232	15.3065	0.00640636	0.395592	0.00269361	0.0325235	0.0110719	0.224458	0.00842807	0.0640073	1.68972e+07	1.53918e+06	2.58636e+08	1.17783e+08
CaO19.6596; CAALFM_CR09670CA	A0A1D8PU04	S-formylglutathione hydrolase OS=Candida albicans (strain SC5314 / ATCC MYA-2876) OX=237561 GN=CAALFM_CR09670CA PE=3 SV=1	50	105	1.62376	492	9	9	0		303	34.2	6.54	2161	28953	155.87	0	53.749	metabolic process	cytoplasm	catalytic activity	Pf00326, Pf00756	3647091	W5Q_06413; I503_06359	Carbon metabolism; Methane metabolism	-2.7395	-2.85142	5.03972	5.24563	-1.45391	-1.51168	2.33334	2.39112	0.365031	0.350702	5.03972	5.24563	0.00647322	0.00513364	0.00276229	0.00109501	0.00470574	0.00388022	0.00322269	0.00130915	2.32458e+07	8.48544e+06	1.21939e+08	4.27643e+07
VAM7; CAALFM_C600240CA	A0A1D8PPA3	Uncharacterized protein OS=Candida albicans (strain SC5314 / ATCC MYA-2876) OX=237561 GN=orf19.1182 PE=4 SV=1	4	987	0.020202	6	1	1	0		297	34.6	8.62	32	347.27	0	0.009	3.374			protein binding	Pf00787, Pf05739	3646062	I503_04589	SNARE interactions in vesicular transport	5.96638	-1.64985	-3.47372	2.83374	2.57685	-0.722331	-1.79648	1.50271	5.96638	0.606117	0.287876	2.83374	0.00653697	1	0.0100948	0.469364	0.00842242	0.54099	0.00906758	0.352658	138426	825901	392263	237757
CaO19.3222; CAALFM_CR01320CA	A0A1D8PRZ2	Uncharacterized protein OS=Candida albicans (strain SC5314 / ATCC MYA-2876) OX=237561 GN=CAALFM_CR01320CA PE=3 SV=1	5	962	0.0240481	24	3	3	0		998	110.4	5.69	155	1630.03	5.74	0	10.851	transport	membrane	protein binding;transporter activity	Pf00916, Pf01740	3640386			-197.334	-6.80934	205.18	7.08007	-7.6245	-2.76752	7.68075	2.82376	0.00506755	0.146857	205.18	7.08007	0.0065957	0.0135829	0.00515472	0.0130764	0.0251445	0.0187955	0.019796	0.0184624	328062	1662.47	2.3227e+06	341105
UBC1; CAALFM_C604280WA	A0A1D8PQD4	E2 ubiquitin-conjugating protein OS=Candida albicans (strain SC5314 / ATCC MYA-2876) OX=237561 GN=orf19.1085 PE=3 SV=1	31	305	0.461207	107	4	4	0		232	25.4	5.33	600	7751.54	19.51	0	28.985			nucleotide binding;protein binding	Pf00179, Pf09288	3646279	W5Q_05004; I503_04968	Ubiquitin mediated proteolysis	-3.49019	-3.22809	7.37553	6.82165	-1.80331	-1.69068	2.88275	2.77012	0.286517	0.309781	7.37553	6.82165	0.00659695	0.354796	0.000464743	0.155233	0.00594816	0.299923	0.000669868	0.215007	3.14266e+06	900426	2.14381e+07	6.64112e+06
PEX14	A0A1D8PSW1	Pex14p OS=Candida albicans (strain SC5314 / ATCC MYA-2876) OX=237561 GN=PEX14 PE=4 SV=1	12	423	0.278761	126	5	5	0		452	49.7	5.16	1088	11577	74.49	0	33.245		membrane	protein binding	Pf04695	3648208		Peroxisome	-3.13813	-2.36322	8.87755	6.6854	-1.6499	-1.24076	3.15016	2.74101	0.318662	0.423151	8.87755	6.6854	0.00671572	0.231766	0.000597148	0.0396722	0.00554014	0.143783	0.000940556	0.054371	7.90214e+06	2.51811e+06	5.28289e+07	2.23546e+07
MSY1; CAALFM_C601050WA	Q59WU2	Tyrosine--tRNA ligase OS=Candida albicans (strain SC5314 / ATCC MYA-2876) OX=237561 GN=orf19.109 PE=3 SV=1	2	963	0.0239521	12	1	1	0		501	56.2	6.81	52	664.14	2.31	0.005	3.842	metabolic process	cytoplasm;mitochondrion	catalytic activity;nucleotide binding;RNA binding	Pf00579	3644015	W5Q_04695; I503_04670	Aminoacyl-tRNA biosynthesis	-56.6985	-3.50111	287.439	17.7492	-5.82524	-1.80781	8.16711	4.14968	0.0176371	0.285624	287.439	17.7492	0.00679407	0.397023	0.0605342	0.108126	0.0197885	0.358872	0.247195	0.224345	94259.5	1662.47	1.67303e+06	477859
SSO2	Q59YF0	Protein transport protein SSO2 OS=Candida albicans (strain SC5314 / ATCC MYA-2876) OX=237561 GN=SSO2 PE=3 SV=1	34	201	0.80678	238	8	8	0		295	34.3	5.36	1810	15023.5	66.37	0	39.427	cell organization and biogenesis;transport	membrane	protein binding	Pf00804	3643809	W5Q_02393; I503_02398	SNARE interactions in vesicular transport	-5.61745	-4.30145	12.1866	9.33168	-2.48991	-2.10482	3.60723	3.22214	0.178017	0.23248	12.1866	9.33168	0.00683108	0.0760359	0.00874017	0.0320516	0.0085044	0.0800211	0.0157639	0.0516372	1.85632e+07	3.30457e+06	1.73226e+08	4.02715e+07
CaO19.7214; CAALFM_C114060WA	A0A1D8PFV8	17-beta-hydroxysteroid dehydrogenase-like protein OS=Candida albicans (strain SC5314 / ATCC MYA-2876) OX=237561 GN=orf19.7214 PE=3 SV=1	13	649	0.11753	59	5	5	0		502	56.9	5.55	156	2895.19	5.89	0	14.936	metabolic process		catalytic activity		3643344	W5Q_01359; I503_01391		-3.61839	-1.5306	6.16241	2.60673	-1.85535	-0.614094	2.6235	1.38224	0.276366	0.65334	6.16241	2.60673	0.00685802	1	0.0450682	0.473119	0.00636201	0.587367	0.0591181	0.326982	2.15797e+06	596390	5.62525e+06	3.6752e+06
CDC12	A0A1D8PCY5	Septin OS=Candida albicans (strain SC5314 / ATCC MYA-2876) OX=237561 GN=CDC12 PE=3 SV=1	5	916	0.0327456	13	2	1	0		397	45.8	6.27	30	759.18	0	0.003	4.595	cell organization and biogenesis	cytoskeleton	nucleotide binding	Pf00735, Pf01926	3636809	W5Q_00311; I503_00310		-4.454	-38.7869	2.58399	22.5022	-2.1551	-5.2775	1.3696	4.49199	0.224517	0.0257819	2.58399	22.5022	0.00692053	0.144093	0.594926	0.172961	0.00745723	0.380226	0.407405	0.38847	8228.64	1847.47	185162	4773.84
TSA1; TSA1B	P0CU34	Peroxiredoxin TSA1-B OS=Candida albicans (strain SC5314 / ATCC MYA-2876) OX=237561 GN=TSA1B PE=2 SV=1	69	30	4.38265	859	19	19	0		196	21.8	5.06	7330	62545.1	313.01	0	127.43	cell organization and biogenesis;cellular homeostasis;metabolic process;regulation of biological process;response to stimulus	cell surface;cytoplasm;nucleus	antioxidant activity;catalytic activity;protein binding	Pf00578, Pf08534, Pf10417	3642269; 30515214	W5Q_03144; I503_03122; I503_03144; I503_03138		-2.47139	-11.9177	1.47801	7.12737	-1.30532	-3.57504	0.563658	2.83337	0.40463	0.0839086	1.47801	7.12737	0.00699299	0.0958776	0.495866	0.13648	0.00456406	0.171383	0.139749	0.193349	1.25035e+08	5.05931e+07	8.91173e+08	7.47771e+07
AHP12; TRP99	A0A1D8PDN3	Peroxiredoxin OS=Candida albicans (strain SC5314 / ATCC MYA-2876) OX=237561 GN=TRP99 PE=3 SV=1	32	103	1.625	299	6	6	0		184	20.1	8.09	3081	24696	155.64	0	36.84	cellular homeostasis;metabolic process;regulation of biological process		antioxidant activity;catalytic activity	Pf08534	3642494	W5Q_00528; I503_00531	Peroxisome	-9.62394	-2.83451	82.7737	24.3791	-3.26663	-1.5031	6.3711	4.60757	0.103908	0.352795	82.7737	24.3791	0.00699332	0.0409664	0.000709667	0.00324124	0.0114223	0.0307882	0.00226068	0.00746712	6.78265e+06	704768	1.65355e+08	5.83363e+07
ENT2; CAALFM_C201390WA	A0A1D8PGB7	Epsin OS=Candida albicans (strain SC5314 / ATCC MYA-2876) OX=237561 GN=orf19.1444 PE=1 SV=1	11	548	0.168582	88	4	4	0		522	59.9	5.24	758	5538.96	21.88	0	15.028				Pf01417	3635726		Endocytosis	-5.06296	-2.03247	17.358	6.96819	-2.33998	-1.02323	4.11753	2.80078	0.197513	0.492012	17.358	6.96819	0.00705434	0.532767	0.0170457	0.0590579	0.00825352	0.272572	0.0350932	0.0827042	1.45259e+06	286905	1.01219e+07	4.98011e+06
SAR1	Q59S78	Small COPII coat GTPase SAR1 OS=Candida albicans (strain SC5314 / ATCC MYA-2876) OX=237561 GN=SAR1 PE=3 SV=2	36	419	0.284211	54	4	4	0		190	21.5	5.59	186	3305.66	5.76	0	17.179	regulation of biological process;response to stimulus;transport	endoplasmic reticulum;Golgi;membrane	catalytic activity;nucleotide binding;protein binding;signal transducer activity	Pf00025, Pf00071, Pf00503, Pf01926, Pf08477, Pf09439	3645865	W5Q_04800; I503_04783	Protein processing in endoplasmic reticulum	-4.28144	-3.52757	6.59414	5.43305	-2.0981	-1.81867	2.72118	2.44176	0.233566	0.283481	6.59414	5.43305	0.00706846	0.0423123	0.00157726	0.0209298	0.00741516	0.0384761	0.002146	0.0255528	1.18535e+06	276857	6.44005e+06	1.82563e+06
UBI3	Q5A109	Ubiquitin-ribosomal 40S subunit protein S31 fusion protein OS=Candida albicans (strain SC5314 / ATCC MYA-2876) OX=237561 GN=UBI3 PE=4 SV=1	42	13	8.31088	1604	12	12	0		193	22.6	9.98	9240	80949.4	212.7	0	85.995	metabolic process	extracellular;ribosome	protein binding;structural molecule activity	Pf00240, Pf01599, Pf11976, Pf13881, Pf14560	3642934	W5Q_04005; I503_04030	Ribosome	-3.61392	-6.78467	2.01604	3.78486	-1.85356	-2.76228	1.01152	1.92024	0.276708	0.147391	2.01604	3.78486	0.0071495	0.130576	0.675285	0.241674	0.00662603	0.180343	0.341533	0.232036	4.35509e+08	1.20509e+08	1.64834e+09	2.4295e+08
CaO19.12120; CaO19.4651; PGA53	Q5AMJ5	GPI-anchored protein 53 OS=Candida albicans (strain SC5314 / ATCC MYA-2876) OX=237561 GN=PGA53 PE=1 SV=2	17	569	0.158273	22	1	1	0		139	14.3	8.94	195	1517.62	16.43	0.003	4.632		membrane			3635599			-32.082	-225.427	-30.4349	-4.33141	-5.00369	-7.81651	-4.92766	-2.11484	0.0311701	0.00443603	0.032857	0.230872	0.00716624	0.0658902	0.153262	0.0607476	0.0179288	0.257516	0.377612	0.0642356	1.91425e+06	59667.4	441947	1960.49
GLO2	A0A1D8PID4	Hydroxyacylglutathione hydrolase OS=Candida albicans (strain SC5314 / ATCC MYA-2876) OX=237561 GN=GLO2 PE=4 SV=1	29	564	0.160448	43	6	6	0		268	30.7	6.84	233	2857.68	9.32	0	22.104			catalytic activity	Pf00753	3644067	W5Q_02347; I503_02353	Pyruvate metabolism	-5.6504	-4.33764	4.68371	3.59554	-2.49835	-2.11691	2.22765	1.84621	0.176979	0.23054	4.68371	3.59554	0.00728021	0.307558	0.0174942	0.382189	0.00909427	0.325536	0.0194855	0.352801	2.0062e+06	355055	7.21338e+06	1.66297e+06
CHT3	P40954	Chitinase 3 OS=Candida albicans (strain SC5314 / ATCC MYA-2876) OX=237561 GN=CHT3 PE=1 SV=2	19	337	0.396825	225	5	5	0		567	60	4.91	2314	18628.2	163.51	0	59.224	metabolic process	cell surface;extracellular	catalytic activity	Pf00704	3638967	W5Q_06453; I503_06399	Amino sugar and nucleotide sugar metabolism; Metabolic pathways	-3.65454	-4.55696	-1.25879	-1.00951	-1.86969	-2.18807	-0.332042	-0.0136606	0.273632	0.219445	0.794411	0.990576	0.007547	0.0286137	1	1	0.00705527	0.0313044	0.504733	0.973483	2.32518e+07	6.36245e+06	2.30327e+07	5.0544e+06
RPP2A	A0A1D8PTS0	Ribosomal protein P2A OS=Candida albicans (strain SC5314 / ATCC MYA-2876) OX=237561 GN=RPP2A PE=3 SV=1	100	40	3.62037	391	8	8	0		108	10.9	3.93	4540	34993.5	218.3	0	51.346	metabolic process	ribosome	structural molecule activity		30515439			-3.48935	-3.85277	10.7692	11.8908	-1.80296	-1.9459	3.42883	3.57177	0.286586	0.259553	10.7692	11.8908	0.00760224	0.0806683	0.00013362	0.0244478	0.00685326	0.0784861	0.00022908	0.043661	2.77893e+07	7.96403e+06	3.30437e+08	8.57659e+07
GDI1	A0A1D8PFX8	Rab GDP dissociation inhibitor OS=Candida albicans (strain SC5314 / ATCC MYA-2876) OX=237561 GN=GDI1 PE=3 SV=1	24	503	0.2049	92	5	5	0		449	50.1	5.27	314	5195.22	20.92	0	32.532	metabolic process;regulation of biological process;response to stimulus;transport		catalytic activity;enzyme regulator activity	Pf00996	3643298	W5Q_01395; I503_01427		-3.5413	-1.37167	2.48822	-1.03759	-1.82428	-0.455929	1.31511	-0.0532331	0.282383	0.729041	2.48822	0.963774	0.00760828	1	0.205917	1	0.00693981	0.7107	0.135402	0.957002	5.21482e+06	1.47258e+06	5.02591e+06	3.66409e+06
AHP11; AHP1	Q5AF44	Peroxiredoxin OS=Candida albicans (strain SC5314 / ATCC MYA-2876) OX=237561 GN=AHP1 PE=3 SV=1	58	25	4.85795	855	7	7	0		176	19.2	5.34	6024	75185.4	425.33	0	99.911	cellular homeostasis;metabolic process;regulation of biological process		antioxidant activity;catalytic activity	Pf00578, Pf08534	3637850	W5Q_03540; I503_03532	Sulfur relay system	-5.17954	-2.39277	21.3054	9.84238	-2.37282	-1.25868	4.41315	3.29901	0.193067	0.417926	21.3054	9.84238	0.00765415	0.349657	0.0123715	0.0480361	0.00908097	0.220053	0.0272987	0.0792358	7.77278e+07	1.50067e+07	7.65027e+08	3.19725e+08
KRS1	Q5ADU2	Lysine--tRNA ligase OS=Candida albicans (strain SC5314 / ATCC MYA-2876) OX=237561 GN=KRS1 PE=3 SV=1	7	671	0.107744	64	3	3	0		594	67.7	5.71	290	3246.38	15.83	0	12.521	metabolic process	cytoplasm	catalytic activity;nucleotide binding	Pf00152, Pf00587, Pf01336	3638486	W5Q_03250; I503_03251	Aminoacyl-tRNA biosynthesis	-4.1261	-1.87244	3.38222	1.53487	-2.04478	-0.904921	1.75797	0.618112	0.24236	0.534062	3.38222	1.53487	0.00766293	0.677124	0.00292863	1	0.0078345	0.306372	0.00257422	0.43932	1.82276e+06	441764	2.79769e+06	1.49414e+06
RBE1	Q59ZX3	Repressed by EFG1 protein 1 OS=Candida albicans (strain SC5314 / ATCC MYA-2876) OX=237561 GN=RBE1 PE=1 SV=1	5	556	0.166052	45	2	2	0		271	29.1	5.08	238	2231.87	12.05	0	7.898	cell organization and biogenesis	cell surface;extracellular		Pf00188	3643317	W5Q_01364; I503_01396		-5.26347	-14.9794	-1.29707	2.19412	-2.39601	-3.90491	-0.375252	1.13364	0.189989	0.0667584	0.770971	2.19412	0.00788945	0.079898	1	0.64961	0.00945161	0.155997	0.767523	0.368213	3.86881e+06	735030	8.48863e+06	566687
ASC1	P83774	Guanine nucleotide-binding protein subunit beta-like protein OS=Candida albicans (strain SC5314 / ATCC MYA-2876) OX=237561 GN=ASC1 PE=1 SV=2	54	98	1.65931	526	14	14	0	Acetyl [N-Term]	317	34.5	6.54	4586	46217.6	245.52	0	121.717	cell communication;regulation of biological process;response to stimulus	cytoplasm;ribosome	enzyme regulator activity;protein binding	Pf00400	3645907	W5Q_05169; I503_05128		-2.58999	-6.45533	-1.31872	1.89003	-1.37295	-2.69049	-0.399139	0.918407	0.386102	0.154911	0.758311	1.89003	0.00790846	0.058161	1	0.562582	0.00542894	0.0782409	0.505518	0.25834	5.02001e+07	1.93824e+07	9.48795e+07	1.46979e+07
EMP46	A0A1D8PTF1	Emp46p OS=Candida albicans (strain SC5314 / ATCC MYA-2876) OX=237561 GN=EMP46 PE=4 SV=1	23	294	0.490323	228	8	8	0		465	53.2	5.47	1522	14173.5	80.14	0	36.248		membrane		Pf03388	3645270	W5Q_06168	Protein processing in endoplasmic reticulum	-13.3093	-3.44354	4.39569	1.1373	-3.73436	-1.78389	2.13609	0.185616	0.0751354	0.290399	4.39569	1.1373	0.00803356	0.0318682	0.00395173	1	0.0150001	0.0284247	0.00422063	0.696419	2.23734e+07	1.68103e+06	2.54453e+07	7.38929e+06
CDC8; CAALFM_C111790WA	Q59TV7	Bifunctional thymidylate/uridylate kinase OS=Candida albicans (strain SC5314 / ATCC MYA-2876) OX=237561 GN=orf19.1137 PE=1 SV=1	17	873	0.0401786	9	2	2	0		224	25.6	6	42	500.98	0	0	7.61	metabolic process		catalytic activity;nucleotide binding	Pf02223	3645326	W5Q_01140; I503_01150	Pyrimidine metabolism; Metabolic pathways	5.25273	-1.83716	2.0741	20.0152	2.39307	-0.877474	1.05249	4.32303	5.25273	0.54432	2.0741	20.0152	0.00803421	0.839365	0.131481	0.0442155	0.0096132	0.36826	0.0691908	0.0955725	17710.5	93028.4	354480	192950
CaO19.1597; ABG1	A0A1D8PIH3	Abg1p OS=Candida albicans (strain SC5314 / ATCC MYA-2876) OX=237561 GN=ABG1 PE=4 SV=1	25	471	0.225694	65	5	5	0		288	32.9	4.87	398	4525.93	26.7	0	21.098	cell organization and biogenesis;transport	membrane		Pf05827	3647715	W5Q_02360; I503_02366		-33.5625	-19.8213	-1.36653	-2.31389	-5.06878	-4.30898	-0.450522	-1.21032	0.0297951	0.0504508	0.731778	0.432172	0.00804805	0.0234064	1	0.21607	0.0203969	0.0504289	0.60206	0.130757	1.40736e+07	419325	6.08222e+06	306853
CaO19.10483; CaO19.2966; CAALFM_C102780WA	Q5AI87	Carboxymethylenebutenolidase OS=Candida albicans (strain SC5314 / ATCC MYA-2876) OX=237561 GN=orf19.2966 PE=4 SV=1	8	458	0.238095	60	2	2	0		252	28.4	6.23	383	4801.93	23.81	0	9.637			catalytic activity	Pf01738, Pf02129, Pf10230	3636871	W5Q_00268; I503_00267	Biosynthesis of secondary metabolites; Metabolic pathways; Biosynthesis of antibiotics	-6.0382	-1.25105	16.0615	3.32776	-2.59412	-0.323137	4.00553	1.73455	0.165612	0.79933	16.0615	3.32776	0.00809352	1	0.0168312	0.14341	0.0104978	0.663182	0.033709	0.124376	1.18166e+06	195697	3.93227e+06	3.14318e+06
CaO19.7284; ASR2	A0A1D8PTU7	Asr2p OS=Candida albicans (strain SC5314 / ATCC MYA-2876) OX=237561 GN=ASR2 PE=4 SV=1	16	820	0.0542636	14	3	3	0		258	27.8	5.57	73	691.34	0	0	8.578					3641907	W5Q_06343; I503_06289		-115.082	-12.3177	20.5784	2.20257	-6.84652	-3.62266	4.36306	1.13919	0.00868942	0.0811843	20.5784	2.20257	0.00810052	0.226581	0.113843	1	0.0277302	0.410413	0.248351	0.616725	878593	7634.46	1.93516e+06	157105
RPT3; PR26	Q5A0L8	Proteasome regulatory particle base subunit OS=Candida albicans (strain SC5314 / ATCC MYA-2876) OX=237561 GN=PR26 PE=3 SV=1	8	721	0.0875912	36	1	1	0		411	45.9	5.36	297	3512.03	29.69	0	7.619	metabolic process;regulation of biological process	cytoplasm;proteasome	catalytic activity;nucleotide binding;RNA binding	Pf00004, Pf00910, Pf01078, Pf05673, Pf06068, Pf07724, Pf07726, Pf07728, Pf13191, Pf13401	3642981	W5Q_01742; I503_01751	Proteasome	-242.128	1.20239	1677.07	5.76049	-7.91963	0.265905	10.7117	2.52619	0.00413005	1.20239	1677.07	5.76049	0.00846038	1	0.000960559	0.151638	0.0335015	0.738969	0.00514462	0.191534	402530	1662.47	2.31877e+06	2.78807e+06
CaO19.2516; CAALFM_C301140WA	A0A1D8PJ36	Uncharacterized protein OS=Candida albicans (strain SC5314 / ATCC MYA-2876) OX=237561 GN=orf19.2516 PE=4 SV=1	27	597	0.142857	34	4	4	0		238	27.3	5.12	194	1972.66	6.03	0	19.342	cellular homeostasis;regulation of biological process			Pf00085, Pf13098, Pf13899, Pf13905	3639902		Protein processing in endoplasmic reticulum	-30.982	1.32073	41.7969	1.02146	-4.95336	0.401331	5.38532	0.0306332	0.0322768	1.32073	41.7969	1.02146	0.00850345	1	0.0118906	1	0.0210603	0.608676	0.0320173	0.96791	962411	31063.5	983065	1.29836e+06
SSE1; MSI3	Q96VB9	Heat shock protein homolog SSE1 OS=Candida albicans (strain SC5314 / ATCC MYA-2876) OX=237561 GN=MSI3 PE=1 SV=2	25	462	0.232525	163	15	15	0		701	78.5	5.3	943	9754.24	28.5	0	54.302	cell organization and biogenesis;response to stimulus	cytoplasm	nucleotide binding	Pf00012, Pf06723	3639821	W5Q_00594; I503_00597	Protein processing in endoplasmic reticulum	-2.42841	-3.22679	1.71432	2.27793	-1.28001	-1.6901	0.777634	1.18772	0.411792	0.309905	1.71432	2.27793	0.00865464	0.327177	0.380592	0.609234	0.00553902	0.276481	0.147981	0.361801	1.02578e+07	4.22408e+06	2.33666e+07	7.24142e+06
CaO19.319; CAALFM_C303200CA	A0A1D8PJN7	Glutaredoxin-like protein OS=Candida albicans (strain SC5314 / ATCC MYA-2876) OX=237561 GN=orf19.319 PE=3 SV=1	22	781	0.0641026	5	2	2	0		78	9.3	7.96	39	153.26	0	0.003	4.067	metabolic process;transport			Pf05768	3638428	W5Q_02869; I503_02862		-8.84557	-297.647	1.17926	39.6814	-3.14495	-8.21746	0.237887	5.31039	0.113051	0.00335969	1.17926	39.6814	0.00879337	0.0909723	1	0.144358	0.0138274	0.373781	0.504193	0.383299	14705.5	1662.47	583534	1960.49
CaO19.12529; CaO19.5063; COI1	Q5A799	Coi1p OS=Candida albicans (strain SC5314 / ATCC MYA-2876) OX=237561 GN=COI1 PE=4 SV=1	42	36	3.84817	735	12	12	0		191	21.3	6.62	4910	50832.2	309.62	0	104.799		cell surface;extracellular			3640721	W5Q_00761; I503_00769		-23.4116	-5.6426	2.54091	-1.63291	-4.54915	-2.49636	1.34535	-0.707444	0.0427139	0.177223	2.54091	0.612404	0.00880026	0.180276	0.164463	1	0.0200168	0.225017	0.11063	0.421687	4.10736e+08	1.75442e+07	2.51537e+08	4.45782e+07
ACB1	A0A1D8PQN3	Long-chain fatty acid transporter OS=Candida albicans (strain SC5314 / ATCC MYA-2876) OX=237561 GN=ACB1 PE=4 SV=1	83	22	5.26744	453	8	8	0		86	9.9	4.92	4068	35579.3	213.04	0	53.713				Pf00887	30515350	W5Q_05128; I503_05084		-6.25208	-2.18124	8.62184	3.00801	-2.64434	-1.12515	3.108	1.58881	0.159947	0.458455	8.62184	3.00801	0.00918207	0.345523	0.000426281	0.163665	0.0121402	0.194382	0.00066244	0.130016	1.16127e+08	1.85742e+07	3.49311e+08	1.60143e+08
HET1	A0A1D8PPA5	Het1p OS=Candida albicans (strain SC5314 / ATCC MYA-2876) OX=237561 GN=HET1 PE=4 SV=1	17	346	0.385787	76	3	3	0	Acetyl [N-Term]	197	21.8	8.5	896	7606.51	42.37	0	13.223	transport	cytoplasm	transporter activity	Pf08718	3647897	W5Q_04600; I503_04575		-9.29463	-1.43779	13.516	2.09079	-3.2164	-0.523848	3.7566	1.06405	0.107589	0.695514	13.516	2.09079	0.00990459	1	0.000377919	0.46727	0.0159286	0.465721	0.000709845	0.248599	5.47876e+06	589454	1.14549e+07	7.96706e+06
RPL13	O59931	60S ribosomal protein L13 OS=Candida albicans (strain SC5314 / ATCC MYA-2876) OX=237561 GN=RPL13 PE=3 SV=1	25	306	0.460396	93	3	3	0		202	23	10.61	873	8683.18	81.47	0	25.318	metabolic process	cell surface;ribosome	structural molecule activity	Pf01294	3636841	W5Q_00292; I503_00291	Ribosome	-3.88706	-4.90941	2.1912	2.76752	-1.95868	-2.29555	1.13172	1.46859	0.257264	0.203691	2.1912	2.76752	0.00998982	0.275592	0.424023	0.557408	0.00978343	0.316318	0.239938	0.409302	1.1736e+07	3.01925e+06	3.24796e+07	6.61578e+06
CaO19.7882; CaO19.251; GLX3	Q5AF03	Glyoxalase 3 OS=Candida albicans (strain SC5314 / ATCC MYA-2876) OX=237561 GN=GLX3 PE=1 SV=1	84	6	12.4534	2939	21	21	0		236	25.8	4.83	28128	273761	1979.73	0	334.661	metabolic process		catalytic activity	Pf01965, Pf13587	3638325			-4.24063	-1.71795	7.26736	2.94412	-2.08428	-0.780685	2.86143	1.55784	0.235814	0.58209	7.26736	2.94412	0.010104	0.882003	0.0144612	0.191351	0.0105298	0.344283	0.0206898	0.149047	5.76764e+08	1.36009e+08	1.69806e+09	9.88425e+08
PST2; PST3	A0A1D8PT02	Flavodoxin-like fold family protein OS=Candida albicans (strain SC5314 / ATCC MYA-2876) OX=237561 GN=PST3 PE=4 SV=1	82	94	1.67839	334	8	8	0		199	21.2	6.27	2764	25602.3	155.72	0	74.672	metabolic process	membrane	catalytic activity;nucleotide binding	Pf03358	3648031	W5Q_06001; I503_05957		-3.02256	1.18006	16.4543	4.61318	-1.59577	0.238857	4.04039	2.20576	0.330846	1.18006	16.4543	4.61318	0.0103184	1	0.000270087	0.0216608	0.00823291	0.503073	0.000545629	0.0238893	1.42421e+07	4.71194e+06	6.57015e+07	7.75315e+07
RTS1	Q59Q44	Serine/threonine-protein phosphatase 2A 56 kDa regulatory subunit OS=Candida albicans (strain SC5314 / ATCC MYA-2876) OX=237561 GN=RTS1 PE=3 SV=1	3	1070	0.00705882	6	2	2	0		850	94.6	6.19	101	422.31	0	0	7.728	regulation of biological process;response to stimulus		enzyme regulator activity	Pf01603	3646557	W5Q_02067; I503_02081	mRNA surveillance pathway; Meiosis - yeast	-5.43087	-103.72	2.5411	48.5306	-2.44118	-6.69655	1.34545	5.60082	0.184133	0.00964133	2.5411	48.5306	0.0103493	0.112661	0.824691	0.136403	0.0126323	0.37722	0.554792	0.381984	33843.5	6231.68	1.64244e+06	15835.3
CaO19.10778; CaO19.3268; TMA19	Q5A860	Translationally-controlled tumor protein homolog OS=Candida albicans (strain SC5314 / ATCC MYA-2876) OX=237561 GN=TMA19 PE=3 SV=1	51	46	3.21557	537	10	10	0		167	18.5	4.46	5870	52717	373.03	0	99.946	metabolic process	cytoplasm;cytoskeleton		Pf00838	3640399	W5Q_05546; I503_05510		-4.61597	-4.69878	3.25715	3.31558	-2.20663	-2.23229	1.70361	1.72926	0.216639	0.212821	3.25715	3.31558	0.0103813	0.119687	0.00391678	0.200294	0.0114539	0.133588	0.00333633	0.17318	3.95615e+07	8.57058e+06	1.31169e+08	2.79156e+07
GRE3	A0A1D8PNK3	Trifunctional aldehyde reductase/xylose reductase/glucose 1-dehydrogenase (NADP(+)) OS=Candida albicans (strain SC5314 / ATCC MYA-2876) OX=237561 GN=GRE3 PE=4 SV=1	33	244	0.617251	229	9	9	0		371	42.4	7.47	2318	20445.5	168.74	0	46.094	metabolic process		catalytic activity	Pf00248	3637811	W5Q_04318; I503_04318	Pentose and glucuronate interconversions; Metabolic pathways	-13.3138	-2.95515	15.1459	3.36179	-3.73485	-1.56323	3.92085	1.74923	0.07511	0.338392	15.1459	3.36179	0.0105185	0.423354	0.0147493	0.346847	0.0196426	0.3309	0.0289149	0.303358	3.01027e+07	2.26101e+06	1.01199e+08	3.4245e+07
HAL22	Q59XQ1	3'(2'),5'-bisphosphate nucleotidase 2 OS=Candida albicans (strain SC5314 / ATCC MYA-2876) OX=237561 GN=HAL22 PE=3 SV=3	20	390	0.324022	116	7	2	5		358	38.7	5.86	961	7614.27	40.65	0	26.455	metabolic process		catalytic activity;metal ion binding	Pf00459	3644051		Sulfur metabolism; Biosynthesis of antibiotics; Metabolic pathways	-5.89935	-5.82163	9.64554	9.51848	-2.56056	-2.54142	3.26986	3.25073	0.16951	0.171773	9.64554	9.51848	0.0110496	0.0185902	0.000140619	0.0114094	0.0141466	0.0236227	0.000229902	0.0185444	3.39571e+06	575607	3.2322e+07	5.55204e+06
CaO19.2757; CAALFM_C402450WA	A0A1D8PLK0	Uncharacterized protein OS=Candida albicans (strain SC5314 / ATCC MYA-2876) OX=237561 GN=orf19.2757 PE=4 SV=1	18	644	0.120482	40	5	5	0		332	39.2	5.01	126	1975.85	7.37	0	16.408	cellular homeostasis;regulation of biological process			Pf00085, Pf13728, Pf13905	3637845			-101.673	-13.6803	14.1474	1.90357	-6.66779	-3.77402	3.82247	0.928705	0.00983548	0.073098	14.1474	1.90357	0.0113761	0.0616716	0.0407274	0.840911	0.0379267	0.116375	0.0778396	0.390479	2.24708e+06	22101.1	4.27747e+06	312675
ICL1	Q59RB8	Isocitrate lyase OS=Candida albicans (strain SC5314 / ATCC MYA-2876) OX=237561 GN=ICL1 PE=3 SV=1	46	203	0.803636	442	17	17	0		550	61.4	7.27	2874	27582.4	127.97	0	83.004	metabolic process		catalytic activity	Pf00463, Pf13714	3646146	W5Q_00439; I503_00442	Glyoxylate and dicarboxylate metabolism; Carbon metabolism; Biosynthesis of secondary metabolites; Metabolic pathways	-25.3715	-3.62183	39.9336	5.70061	-4.66514	-1.85672	5.31953	2.51112	0.0394143	0.276103	39.9336	5.70061	0.0117613	0.26374	0.00571485	0.15493	0.027434	0.244846	0.0152002	0.194524	1.03303e+08	4.07162e+06	5.8889e+08	1.62594e+08
ATP11; CAALFM_C701350CA; CaJ7_0150	A0A1D8PQT7	Uncharacterized protein OS=Candida albicans (strain SC5314 / ATCC MYA-2876) OX=237561 GN=orf19.6916 PE=4 SV=1	17	813	0.0564263	18	4	4	0		319	36.9	8.53	75	826.61	0	0	9.86	cell organization and biogenesis	mitochondrion		Pf06644	3645899	W5Q_05178; I503_05137		-209.557	-8.94202	75.0806	3.20377	-7.7112	-3.1606	6.23037	1.67977	0.00477197	0.111832	75.0806	3.20377	0.0120726	0.195076	0.0126032	0.501608	0.046547	0.308278	0.0392614	0.421293	1.33278e+06	6360	4.26993e+06	477513
CaO19.713; CAALFM_CR06530WA	A0A1D8PT84	Uncharacterized protein OS=Candida albicans (strain SC5314 / ATCC MYA-2876) OX=237561 GN=CAALFM_CR06530WA PE=4 SV=1	25	95	1.66667	230	4	4	0	Acetyl [N-Term]	138	15.3	5.07	2503	19150.8	110.27	0	24.17			DNA binding	Pf01984	3645262	W5Q_06103; I503_06062		-10.4719	-2.31317	32.0122	7.07123	-3.38846	-1.20987	5.00055	2.82196	0.0954933	0.432308	32.0122	7.07123	0.0121491	0.125787	2.3805e-05	0.0164495	0.0205834	0.076093	5.9519e-05	0.0232099	4.89236e+06	467188	3.4595e+07	1.49557e+07
CIT1	A0A1D8PSH3	Citrate synthase OS=Candida albicans (strain SC5314 / ATCC MYA-2876) OX=237561 GN=CIT1 PE=3 SV=1	51	97	1.65953	775	18	18	0		467	52	7.47	6374	65476.7	329.05	0	146.808	metabolic process	mitochondrion	catalytic activity	Pf00285	3643201	W5Q_05933; I503_05762		-4.97947	-2.05697	7.86297	3.24812	-2.31599	-1.04052	2.97507	1.6996	0.200825	0.486152	7.86297	3.24812	0.0121774	0.816517	0.0540144	0.327795	0.0141013	0.424802	0.0803484	0.278561	5.52599e+07	1.10976e+07	1.79491e+08	8.72597e+07
EFT2	Q5A0M4	Elongation factor 2 OS=Candida albicans (strain SC5314 / ATCC MYA-2876) OX=237561 GN=EFT2 PE=1 SV=2	33	212	0.755344	636	22	22	0		842	93.3	6.47	4507	44731.5	252.23	0	122.024	metabolic process;response to stimulus	cell surface;cytoplasm;membrane	catalytic activity;nucleotide binding;RNA binding	Pf00009, Pf00679, Pf03144, Pf03764, Pf14492	3642998	W5Q_01746; I503_01755		-2.40958	-2.79647	5.33596	6.19273	-1.26878	-1.48361	2.41575	2.63058	0.41501	0.357593	5.33596	6.19273	0.0122055	0.393319	0.00779239	0.141601	0.00774307	0.291766	0.00941223	0.186247	7.70096e+07	3.19598e+07	4.769e+08	1.70536e+08
PCK1	A0A1D8PRM7	Phosphoenolpyruvate carboxykinase OS=Candida albicans (strain SC5314 / ATCC MYA-2876) OX=237561 GN=PCK1 PE=3 SV=1	29	583	0.151899	84	11	11	0		553	60.9	6.48	549	5222.16	22.85	0	45.967	metabolic process		catalytic activity;nucleotide binding	Pf01293	3639701	W5Q_05484; I503_05448	Glycolysis / Gluconeogenesis; Biosynthesis of antibiotics; Biosynthesis of secondary metabolites; Pyruvate metabolism; Citrate cycle (TCA cycle); Carbon metabolism; Metabolic pathways	-2.71069	-13.8087	-1.09008	4.67322	-1.43866	-3.78751	-0.124428	2.22442	0.368909	0.0724181	0.917368	4.67322	0.0122272	0.156989	1	0.330547	0.00879541	0.297299	0.844591	0.367637	6.54173e+06	2.4133e+06	3.05709e+07	2.21389e+06
GPS2; CAALFM_C600850WA	Q59WW7	Glutathione peroxidase OS=Candida albicans (strain SC5314 / ATCC MYA-2876) OX=237561 GN=orf19.86 PE=3 SV=1	25	477	0.223602	36	4	4	0		161	18.1	7.08	275	2288.76	7.25	0	11.102	metabolic process;response to stimulus		antioxidant activity;catalytic activity	Pf00255, Pf00578, Pf08534	3644010	W5Q_04674; I503_04650	Glutathione metabolism; Arachidonic acid metabolism	-6.43548	-5.36184	20.1934	16.8246	-2.68605	-2.42273	4.33582	4.0725	0.155389	0.186503	20.1934	16.8246	0.0123791	0.325125	0.0120079	0.16252	0.0166255	0.393845	0.0260321	0.330931	1.73142e+06	269042	2.91303e+07	5.43289e+06
CaO19.2452; CAALFM_C105950CA	A0A1D8PDN8	Uncharacterized protein OS=Candida albicans (strain SC5314 / ATCC MYA-2876) OX=237561 GN=orf19.2452 PE=4 SV=1	18	356	0.373494	155	6	6	0		415	45.1	4.51	1465	13690.1	105.82	0	34.538					3639859			-5.2641	-1.86785	5.23976	1.85922	-2.39619	-0.901381	2.3895	0.894694	0.189966	0.535374	5.23976	1.85922	0.0125718	0.540172	0.000456955	0.584292	0.0150622	0.24345	0.000545947	0.261381	1.44497e+07	2.74495e+06	2.68651e+07	1.43829e+07
CMP65; MP65	Q59XX2	Cell surface mannoprotein MP65 OS=Candida albicans (strain SC5314 / ATCC MYA-2876) OX=237561 GN=MP65 PE=1 SV=3	29	84	1.88889	714	9	9	0		378	39.2	5.45	10551	76691.8	693.47	0	70.551	cell communication;cell organization and biogenesis;metabolic process;regulation of biological process;response to stimulus	cell surface;extracellular	catalytic activity	Pf00332	3643951			-7.15086	-3.15732	1.28617	-1.76093	-2.83812	-1.6587	0.363082	-0.816336	0.139843	0.316724	1.28617	0.567882	0.0126811	0.089882	0.488109	0.46642	0.0179953	0.0745437	0.0886118	0.190378	5.68097e+08	7.94446e+07	3.22612e+08	1.02179e+08
GBP2	A0A1D8PQM1	Single-stranded telomeric DNA-binding/mRNA-binding protein OS=Candida albicans (strain SC5314 / ATCC MYA-2876) OX=237561 GN=GBP2 PE=4 SV=1	39	269	0.541284	236	10	10	0		436	49.2	6.13	1986	21033	138.14	0	56.381			DNA binding;RNA binding	Pf00076, Pf13893, Pf14259	3637992	W5Q_05099; I503_05055		-5.44827	-3.00897	27.703	15.2998	-2.4458	-1.58927	4.79197	3.93544	0.183544	0.33234	27.703	15.2998	0.0129194	0.222627	0.00933096	0.0400467	0.0157992	0.176907	0.0223568	0.0788006	4.88882e+06	897316	7.47979e+07	2.48583e+07
MGE1	Q5A9E1	GrpE protein homolog OS=Candida albicans (strain SC5314 / ATCC MYA-2876) OX=237561 GN=MGE1 PE=3 SV=1	9	726	0.0867769	21	2	2	0		242	27.2	5.91	113	1198.19	7.91	0	10.629	metabolic process;regulation of biological process	mitochondrion;organelle lumen	enzyme regulator activity;nucleotide binding;protein binding	Pf01025	3640133	W5Q_05598; I503_05561		-282.289	-2.13415	751.716	5.68308	-8.14103	-1.09366	9.55404	2.50667	0.00354247	0.468571	751.716	5.68308	0.0129745	0.452992	0.00407254	0.0758431	0.0528128	0.247709	0.0194546	0.0950569	469297	1662.47	2.66705e+06	1.2497e+06
NSR1; CAALFM_C100160CA	Q5AB84	Uncharacterized protein OS=Candida albicans (strain SC5314 / ATCC MYA-2876) OX=237561 GN=orf19.6090 PE=4 SV=1	9	925	0.03	12	3	3	0		400	43.5	4.69	24	451.22	0	0	8.767			RNA binding	Pf00076, Pf13893, Pf14259	3639341	W5Q_00014; I503_00015		-2.68199	-17.2106	-1.2621	5.08449	-1.42331	-4.10523	-0.335821	2.3461	0.372857	0.0581036	0.792333	5.08449	0.0135257	0.126457	1	0.277417	0.00962559	0.259567	0.678756	0.325424	223725	83417.5	1.13753e+06	66094.5
CaO19.2263; CAALFM_C207080CA; CaO19.9803	Q59Z37	Uncharacterized protein OS=Candida albicans (strain SC5314 / ATCC MYA-2876) OX=237561 GN=orf19.2263 PE=4 SV=1	56	177	0.921788	165	7	7	0	Acetyl [N-Term]	179	20.5	9.19	987	10585	45.28	0	44.671				Pf00571	3643502	W5Q_02129; I503_02145		-4.6869	-2.91611	60.5241	37.6571	-2.22863	-1.54405	5.91944	5.23485	0.213361	0.342922	60.5241	37.6571	0.0135626	0.33018	7.36718e-05	0.0459103	0.015113	0.254907	0.000218048	0.120167	1.24957e+06	266609	4.70551e+07	1.61363e+07
PMU1; CAALFM_C306920WA	Q5ADN2	Putative phosphomutase OS=Candida albicans (strain SC5314 / ATCC MYA-2876) OX=237561 GN=orf19.6809 PE=4 SV=1	27	478	0.223602	72	5	5	0		322	37.3	5.47	109	3083.59	0	0	18.065				Pf00300	3638511	W5Q_03203; I503_03203		-25.9289	-2.2689	35.7288	3.12644	-4.69649	-1.18199	5.15902	1.64452	0.038567	0.440742	35.7288	3.12644	0.0138381	0.682672	0.0012523	0.39207	0.0324952	0.403457	0.00323032	0.322384	2.11831e+06	81696.8	6.62276e+06	2.91893e+06
CAALFM_C100450CA	A0A1D8PC73	Uncharacterized protein OS=Candida albicans (strain SC5314 / ATCC MYA-2876) OX=237561 GN=orf19.6062.3 PE=4 SV=1	47	271	0.54	81	5	5	0		150	16.6	5.01	922	7148.71	51.5	0	19.466				Pf07956	30514955	W5Q_00039; I503_00039		-68.0661	-3.31632	844.697	41.1553	-6.08886	-1.72958	9.72229	5.36301	0.0146916	0.301539	844.697	41.1553	0.0140435	0.502125	0.0162409	0.106864	0.0427544	0.434233	0.0789493	0.286556	594620	8735.93	2.44718e+07	7.37921e+06
YWP1	Q59Y31	Yeast-form wall Protein 1 OS=Candida albicans (strain SC5314 / ATCC MYA-2876) OX=237561 GN=YWP1 PE=1 SV=1	3	292	0.493433	263	1	1	0		533	54.2	4.81	780	14119.6	95.76	0	12.556		cell surface;extracellular;membrane		Pf13928	3643915			-2.35853	-1.2892	-1.0336	-1.89092	-1.23789	-0.366477	-0.0476838	-0.919092	0.423994	0.775674	0.967488	0.528842	0.0141574	1	1	0.0261657	0.00876265	0.247038	0.899597	0.0120243	2.58593e+08	1.09642e+08	1.36755e+08	1.06077e+08
SNU13; CAALFM_C304380CA	Q5ANL6	13 kDa ribonucleoprotein-associated protein OS=Candida albicans (strain SC5314 / ATCC MYA-2876) OX=237561 GN=SNU13 PE=3 SV=1	27	227	0.698413	88	2	2	0		126	13.6	7.97	892	8736.04	72.74	0	22.164	metabolic process	nucleus;spliceosomal complex	RNA binding	Pf01248	3635173	W5Q_02947; I503_02941	Ribosome biogenesis in eukaryotes; Spliceosome	-71.9652	1.35742	968.556	9.91493	-6.16923	0.440862	9.91969	3.3096	0.0138956	1.35742	968.556	9.91493	0.0142555	1	0.0208027	0.0656405	0.0439726	0.669716	0.103178	0.108622	2.28029e+06	31686.1	2.26089e+07	3.06897e+07
GCA2; GCA12	A0A1D8PEW1	Gca2p OS=Candida albicans (strain SC5314 / ATCC MYA-2876) OX=237561 GN=GCA2 PE=3 SV=1	18	464	0.231501	219	9	9	0		946	105.6	4.93	1874	16775	129.49	0	47.989	metabolic process	extracellular	catalytic activity	Pf01055	3647194			-22.4971	-9.52481	1.09645	-2.15418	-4.49167	-3.25169	0.132841	-1.10714	0.0444501	0.104989	1.09645	0.464214	0.014285	0.0416112	1	0.34284	0.0320817	0.0676533	0.805406	0.189786	2.31984e+07	1.03117e+06	1.0769e+07	1.13063e+06
SRP1; CAALFM_C500150CA	A0A1D8PMU8	Importin subunit alpha OS=Candida albicans (strain SC5314 / ATCC MYA-2876) OX=237561 GN=orf19.5682 PE=3 SV=1	6	929	0.0294659	16	2	2	0		543	60.9	4.93	52	735.71	1.73	0	6.861	transport	cytoplasm;nucleus	protein binding;transporter activity	Pf00514, Pf01749, Pf13513, Pf13646	3647872	W5Q_04052; I503_04050		4.80748	-1.4571	24.5528	171.991	2.26528	-0.543096	4.61781	7.42619	4.80748	0.686296	24.5528	171.991	0.014371	1	0.0362624	0.0137193	0.0162772	0.533467	0.0837264	0.0509411	4020.78	19329.8	691539	474601
CaO19.2864; CAALFM_CR03020CA; CaO19.10382	Q5A1X9	Uncharacterized protein OS=Candida albicans (strain SC5314 / ATCC MYA-2876) OX=237561 GN=CAALFM_CR03020CA PE=4 SV=1	21	534	0.180769	47	4	4	0		260	30.3	7.21	141	2934.12	13.99	0	16.66				Pf01966, Pf13023	3642598			-13.3984	-4.20746	59.8071	18.781	-3.74399	-2.07295	5.90225	4.2312	0.0746357	0.237673	59.8071	18.781	0.0144112	0.0265456	0.0245357	0.00456929	0.0269776	0.0275138	0.0724079	0.0096668	545579	40719.6	1.02465e+07	2.43532e+06
CaO19.14055; CaO19.6763; SLK19	Q5ADT0	Slk19p OS=Candida albicans (strain SC5314 / ATCC MYA-2876) OX=237561 GN=SLK19 PE=4 SV=1	35	181	0.86132	1031	34	34	0		1197	133.9	5.16	10428	91701.1	610.27	0	192.861	cell organization and biogenesis;response to stimulus			Pf04502, Pf12757	3638466	W5Q_03240; I503_03241		-4.11757	-1.34787	32.3357	10.585	-2.04179	-0.430684	5.01506	3.40395	0.242862	0.74191	32.3357	10.585	0.0144557	1	0.00269864	0.0822495	0.0147578	0.640644	0.00676691	0.139986	4.37961e+07	1.06364e+07	4.63582e+08	3.43936e+08
RPL1; RPL10A	Q9UVJ4	60S ribosomal protein L10a OS=Candida albicans (strain SC5314 / ATCC MYA-2876) OX=237561 GN=RPL10A PE=3 SV=2	21	218	0.741935	161	5	5	0		217	24.4	9.76	1493	12075	71.26	0	32.309	metabolic process	ribosome	RNA binding;structural molecule activity	Pf00687	3645868	W5Q_04802; I503_04785	Ribosome	-3.80327	-9.0553	-2.97259	-1.2485	-1.92724	-3.17876	-1.57172	-0.320198	0.262932	0.110433	0.336407	0.80096	0.0144826	0.00824607	0.152889	1	0.0139557	0.0131061	0.120149	0.429306	1.78105e+07	4.68294e+06	1.42655e+07	1.57538e+06
COF1	A0A1D8PMW6	Cofilin OS=Candida albicans (strain SC5314 / ATCC MYA-2876) OX=237561 GN=COF1 PE=3 SV=1	96	2	20.1631	2843	20	20	0	Acetyl [N-Term]	141	15.8	5.21	26846	208020	1426.94	0	179.011	cell organization and biogenesis	cytoskeleton	protein binding	Pf00241	30515293	W5Q_04075; I503_04073		-8.82476	-1.00278	25.955	2.94934	-3.14156	-0.00400792	4.69794	1.56039	0.113317	0.997226	25.955	2.94934	0.0145132	1	0.0101333	0.2008	0.022797	0.995461	0.0238027	0.156663	1.49163e+09	1.69028e+08	4.39932e+09	4.38712e+09
CaO19.7239; MDG1	A0A1D8PFV7	Mdg1p OS=Candida albicans (strain SC5314 / ATCC MYA-2876) OX=237561 GN=MDG1 PE=4 SV=1	53	135	1.2303	812	27	27	0	Acetyl [N-Term]	660	70.5	4.86	4675	54718.5	328.37	0	130.86					3643311	W5Q_01381		-5.14592	-2.73329	20.1957	10.7271	-2.36343	-1.45064	4.33598	3.42319	0.194329	0.365859	20.1957	10.7271	0.014577	0.69992	0.0246364	0.206163	0.0172259	0.507666	0.0534114	0.352867	6.48618e+07	1.26045e+07	6.95778e+08	2.54557e+08
HEX1	A0A1D8PNR7	Beta-hexosaminidase OS=Candida albicans (strain SC5314 / ATCC MYA-2876) OX=237561 GN=HEX1 PE=3 SV=1	17	457	0.240214	135	5	5	0		562	63.4	5.53	1496	15717.2	101.73	0	77.822	metabolic process	extracellular	catalytic activity	Pf00728, Pf02838, Pf14845	3646981	W5Q_04381; I503_04378	Other glycan degradation; Metabolic pathways; Various types of N-glycan biosynthesis; Glycosaminoglycan degradation; Amino sugar and nucleotide sugar metabolism	-39.7471	-2.85504	2.37941	-5.85092	-5.31278	-1.51351	1.2506	-2.54866	0.0251591	0.350258	2.37941	0.170913	0.0146527	0.0499341	0.0365878	0.0492214	0.0389234	0.0377878	0.0228785	0.0627244	1.75135e+07	440623	2.99329e+06	1.04842e+06
ENG1	Q5AIR7	Endo-1,3(4)-beta-glucanase 1 OS=Candida albicans (strain SC5314 / ATCC MYA-2876) OX=237561 GN=ENG1 PE=1 SV=1	16	523	0.1869	214	11	11	0		1145	124	5.4	2807	20072.6	166.8	0	78.726	metabolic process	cell surface;extracellular	catalytic activity	Pf03639	3636886			-8.60799	-2.60152	4.01784	1.21428	-3.10568	-1.37935	2.00642	0.280096	0.116171	0.384391	4.01784	1.21428	0.0146542	0.538278	0.0270474	1	0.0227556	0.371238	0.0271342	0.796029	1.55429e+07	1.80563e+06	1.88733e+07	7.25475e+06
TIM44	Q5A7M2	Mitochondrial import inner membrane translocase subunit TIM44 OS=Candida albicans (strain SC5314 / ATCC MYA-2876) OX=237561 GN=TIM44 PE=3 SV=1	4	1020	0.0141509	6	2	2	0		424	47.5	8.81	33	301.62	0	0.003	4.312	transport	membrane;mitochondrion	protein binding	Pf04280	3640529	W5Q_02516; I503_02523		-10.266	-65.6518	9.39672	60.0928	-3.3598	-6.03676	3.23216	5.90912	0.097409	0.0152319	9.39672	60.0928	0.0146876	0.125776	0.232205	0.128689	0.0246736	0.379641	0.375262	0.380219	17066.9	1662.47	1.0256e+06	15621.8
TRP1	P43073	N-(5'-phosphoribosyl)anthranilate isomerase OS=Candida albicans (strain SC5314 / ATCC MYA-2876) OX=237561 GN=TRP1 PE=3 SV=2	6	774	0.0663717	15	1	1	0		226	24.8	5.33	173	1330.42	10.9	0.002	5.262	metabolic process		catalytic activity	Pf00697	3639321	W5Q_00010; I503_00011	Biosynthesis of antibiotics; Phenylalanine, tyrosine and tryptophan biosynthesis; Biosynthesis of amino acids; Biosynthesis of secondary metabolites; Metabolic pathways	-148.043	1.20267	334.398	1.87814	-7.20987	0.266245	8.38542	0.909308	0.00675481	1.20267	334.398	1.87814	0.0147034	1	0.0309062	0.772333	0.0530047	0.79909	0.129581	0.351144	246116	1662.47	462242	555926
RAX2	A0A1D8PFE5	Rax2p OS=Candida albicans (strain SC5314 / ATCC MYA-2876) OX=237561 GN=RAX2 PE=4 SV=1	4	712	0.091888	128	4	4	0		1393	154.3	4.79	1079	8723.81	54.92	0	19.27		cell surface;membrane		Pf12768	3647610			-12.7982	-1.81522	11.6205	1.64819	-3.67787	-0.860144	3.5386	0.720882	0.0781362	0.550898	11.6205	1.64819	0.0151579	0.716812	0.000546964	1	0.0278744	0.308281	0.000967745	0.397123	6.0688e+06	474193	1.00025e+07	5.51037e+06
VPS29; CAALFM_C100320WA	Q5AB94	Vacuolar protein sorting-associated protein 29 OS=Candida albicans (strain SC5314 / ATCC MYA-2876) OX=237561 GN=orf19.6076 PE=3 SV=1	18	396	0.318008	83	4	4	0		261	29.1	4.61	1078	7269.57	44.32	0	16.024	transport	cytosol		Pf12850	3639297	W5Q_00027; I503_00027	Endocytosis	-9.00398	-1.37995	26.2363	4.02099	-3.17056	-0.464621	4.71349	2.00755	0.111062	0.724661	26.2363	4.02099	0.0154728	1	8.4299e-05	0.0206456	0.0245287	0.240604	0.000198671	0.0207235	2.0171e+06	224023	8.11073e+06	5.87753e+06
RPL17; RPL17B	Q59TE0	Ribosomal 60S subunit protein L17B OS=Candida albicans (strain SC5314 / ATCC MYA-2876) OX=237561 GN=RPL17B PE=3 SV=1	16	735	0.0810811	15	1	1	0		185	21	10.77	18	582.95	0	0.01	3.296	metabolic process;response to stimulus	cell surface;ribosome	structural molecule activity	Pf00237	3645439	W5Q_01892; I503_01908	Ribosome	-5.04772	-2.25554	1.0882	-2.05653	-2.33563	-1.17347	0.121947	-1.04021	0.198109	0.443353	1.0882	0.486256	0.0155522	0.888943	1	0.522445	0.0181621	0.521574	0.923632	0.271727	790775	156660	384519	170478
RPS12	Q5ADQ6	40S ribosomal protein S12 OS=Candida albicans (strain SC5314 / ATCC MYA-2876) OX=237561 GN=RPS12 PE=3 SV=1	40	343	0.391608	56	4	4	0	Acetyl [N-Term]	143	15.7	4.7	332	3154.12	3.46	0	17.491	metabolic process	ribosome	structural molecule activity	Pf01248	3638438	W5Q_03225; I503_03225	Ribosome	-4.2686	-15.0447	2.39323	8.43497	-2.09376	-3.91118	1.25896	3.07638	0.234269	0.0664686	2.39323	8.43497	0.0156119	0.168802	0.703665	0.230253	0.0163438	0.330109	0.442944	0.354173	2.62571e+06	615123	2.21478e+07	1.47213e+06
CAR2	A0A1D8PL14	Ornithine aminotransferase OS=Candida albicans (strain SC5314 / ATCC MYA-2876) OX=237561 GN=CAR2 PE=3 SV=1	61	110	1.53899	671	22	22	0		436	47.3	6.42	5291	45561.3	264.08	0	129.099	metabolic process;response to stimulus		catalytic activity	Pf00202, Pf01212	3645027	W5Q_03318; I503_03319	Biosynthesis of antibiotics; Metabolic pathways; Biosynthesis of secondary metabolites; Arginine and proline metabolism	-8.59928	-5.26928	3.76789	2.3088	-3.10422	-2.3976	1.91376	1.20715	0.116289	0.189779	3.76789	2.3088	0.0157088	0.0868098	0.0402781	0.378169	0.0243818	0.104068	0.0385412	0.228253	4.88337e+07	5.67881e+06	1.12747e+08	2.13972e+07
RPO26	Q59QT0	DNA-directed RNA polymerase core subunit OS=Candida albicans (strain SC5314 / ATCC MYA-2876) OX=237561 GN=RPO26 PE=3 SV=1	22	260	0.573248	90	2	2	0		157	17.5	4.6	543	8178.76	51.75	0	21.417	metabolic process;response to stimulus	nucleus	catalytic activity;DNA binding	Pf01192	3646351	W5Q_04358; I503_04355	Metabolic pathways; Purine metabolism; RNA polymerase; Pyrimidine metabolism	-389.255	-3.5014	1753.11	15.7694	-8.60457	-1.80793	10.7757	3.97906	0.00256901	0.2856	1753.11	15.7694	0.0157445	0.270634	0.00223312	0.0736343	0.0677375	0.244644	0.0120317	0.146498	647124	1662.47	1.02048e+07	2.91449e+06
CaO19.11721; CaO19.4246; CAALFM_C502380WA	A0A1D8PNE5	Uncharacterized protein OS=Candida albicans (strain SC5314 / ATCC MYA-2876) OX=237561 GN=orf19.4246 PE=4 SV=1	10	956	0.0251256	15	4	4	0		597	66.3	5.59	123	1017.39	3.25	0	13.038	cell communication;response to stimulus			Pf13242, Pf13344	3637794			-586.963	-90.5138	17.0006	2.62161	-9.19712	-6.50007	4.08751	1.39045	0.00170369	0.011048	17.0006	2.62161	0.0157877	0.0899014	0.163868	0.716249	0.0726009	0.292182	0.334905	0.497955	975807	1662.47	2.55819e+06	28262.9
CYS4; CaO19.12011	Q59T95	Cystathionine beta-synthase OS=Candida albicans (strain SC5314 / ATCC MYA-2876) OX=237561 GN=CYS4 PE=3 SV=1	21	528	0.183468	91	5	5	0	Acetyl [N-Term]	496	53.9	6.35	729	5370.77	25.75	0	20.575	metabolic process	cytoplasm	catalytic activity	Pf00291, Pf00571	3645429	W5Q_00177; I503_00179	Cysteine and methionine metabolism; Glycine, serine and threonine metabolism; Metabolic pathways; Biosynthesis of antibiotics; Biosynthesis of amino acids	-7.89253	-1.68648	17.3855	3.71495	-2.98049	-0.754016	4.11981	1.89334	0.126702	0.592951	17.3855	3.71495	0.0158202	0.197989	0.000801352	0.0124577	0.023576	0.0746433	0.00165071	0.0117933	2.20649e+06	279567	8.197e+06	4.86042e+06
CaO19.1409; VAC7; CaO19.8985	Q59PA6	Vac7p OS=Candida albicans (strain SC5314 / ATCC MYA-2876) OX=237561 GN=VAC7 PE=4 SV=1	9	846	0.0462131	36	6	6	0		779	86.5	5.41	121	1812.27	4.03	0	17.476	cell organization and biogenesis;response to stimulus	membrane		Pf12751	3646849	W5Q_03740; I503_03734		2.5819	-3.02533	3.08546	24.1008	1.36843	-1.59709	1.62549	4.59101	2.5819	0.330542	3.08546	24.1008	0.0158708	0.593745	0.0666686	0.139268	0.0108591	0.474133	0.0541844	0.31969	120861	312052	2.91286e+06	962823
CST20	P0CY24	Serine/threonine-protein kinase CST20 OS=Candida albicans (strain SC5314 / ATCC MYA-2876) OX=237561 GN=CST20 PE=3 SV=1	3	1068	0.00732899	9	3	3	0		1228	132.7	7.06	104	571.86	3.77	0	10.053	cell communication;cell differentiation;cell organization and biogenesis;conjugation;metabolic process;regulation of biological process;reproduction;response to stimulus	cytoplasm;nucleus	catalytic activity;nucleotide binding	Pf00069, Pf00786, Pf07714, Pf14531	3637790	W5Q_04261; I503_04258	Hippo signaling pathway -multiple species; MAPK signaling pathway - yeast	-9.60596	-170.457	8.14742	144.576	-3.26393	-7.41327	3.02634	7.17568	0.104102	0.00586657	8.14742	144.576	0.0159353	0.10145	0.248161	0.104934	0.0260058	0.376038	0.37551	0.376486	15969.6	1662.47	2.30882e+06	13544.8
NBP2; CaJ7_0156	Q5AGV0	Nbp2p OS=Candida albicans (strain SC5314 / ATCC MYA-2876) OX=237561 GN=NBP2 PE=4 SV=1	5	918	0.0321637	11	1	1	0		342	39	4.4	0	345.4	0	0.003	4.442	cell organization and biogenesis		protein binding	Pf00018, Pf07653, Pf14604	3636963	W5Q_05184; I503_05143		-24.7552	-7.53457	19.5457	5.94898	-4.62966	-2.91352	4.28878	2.57264	0.0403956	0.132722	19.5457	5.94898	0.0159527	0.0723081	0.0660317	0.0890045	0.0369277	0.105336	0.141598	0.114488	238363	9628.8	1.41801e+06	188201
LSB5; CAALFM_C209710CA	A0A1D8PIJ4	Uncharacterized protein OS=Candida albicans (strain SC5314 / ATCC MYA-2876) OX=237561 GN=orf19.1381 PE=4 SV=1	13	675	0.105603	49	5	5	0		464	51.9	5.62	281	3611.75	17.06	0	19.763	transport			Pf00790, Pf03127	3643786			-5.00731	-2.89342	10.412	6.01648	-2.32404	-1.53277	3.38018	2.58892	0.199708	0.345612	10.412	6.01648	0.0161825	0.387383	0.0248396	0.150881	0.0188043	0.296885	0.0419812	0.195309	562651	112366	3.38518e+06	1.16996e+06
ACH1	P83773	Acetyl-CoA hydrolase OS=Candida albicans (strain SC5314 / ATCC MYA-2876) OX=237561 GN=ACH1 PE=1 SV=3	32	309	0.45229	237	11	11	0		524	58	6.92	1153	13698.4	56.35	0	55.707	metabolic process;response to stimulus	cytoplasm;cytosol;mitochondrion	catalytic activity	Pf02550, Pf13336	3643773	W5Q_04230; I503_04229	Pyruvate metabolism	-3.7051	-2.5723	6.71859	4.66444	-1.88951	-1.36306	2.74816	2.22171	0.269898	0.388757	6.71859	4.66444	0.0162038	0.490205	0.0431929	0.199865	0.0153087	0.334089	0.0593505	0.22202	4.80147e+06	1.29591e+06	2.23962e+07	8.70666e+06
IRE1	A0A1D8PE76	Bifunctional endoribonuclease/protein kinase OS=Candida albicans (strain SC5314 / ATCC MYA-2876) OX=237561 GN=IRE1 PE=4 SV=1	3	841	0.0474244	58	2	2	0		1223	139.2	5.81	690	5514.68	42.92	0	11.026	metabolic process;response to stimulus	membrane	catalytic activity;nucleotide binding	Pf00069, Pf06479, Pf07714	3640726		Protein processing in endoplasmic reticulum	-12.5705	-1.48992	12.5605	1.48874	-3.65196	-0.575232	3.65083	0.574094	0.0795516	0.671178	12.5605	1.48874	0.016227	0.674106	0.0146407	0.709026	0.0296303	0.193884	0.0267253	0.203524	1.27626e+06	101528	1.90002e+06	1.27525e+06
CaO19.1841; CAALFM_CR06920WA	A0A1D8PTC7	Uncharacterized protein OS=Candida albicans (strain SC5314 / ATCC MYA-2876) OX=237561 GN=CAALFM_CR06920WA PE=4 SV=1	3	719	0.0882353	33	1	1	0		374	44	5.38	429	2370.3	16.21	0.003	4					3647314			-222.563	-1.14115	1815	9.3061	-7.79807	-0.190491	10.8258	3.21818	0.00449311	0.876307	1815	9.3061	0.0162615	1	0.00530001	0.004521	0.063404	0.713078	0.0286883	0.00727469	370004	1662.47	3.4433e+06	3.01739e+06
CMD1	A0A1D8PMF8	Calmodulin OS=Candida albicans (strain SC5314 / ATCC MYA-2876) OX=237561 GN=CMD1 PE=3 SV=1	95	50	3.13423	467	19	19	0		149	16.5	4.41	3200	30877.3	161.31	0	134.969	metabolic process;regulation of biological process;response to stimulus		metal ion binding;protein binding	Pf00036, Pf12763, Pf13202, Pf13405, Pf13499, Pf13833, Pf14658	3646520	W5Q_03893; I503_03918		-2.81424	-3.34845	10.4259	12.405	-1.49274	-1.74349	3.3821	3.63285	0.355336	0.298646	10.4259	12.405	0.0164613	0.525902	0.0128041	0.188043	0.0122862	0.458453	0.0216523	0.341565	2.03907e+07	7.24555e+06	2.52947e+08	7.55415e+07
CRW1; CSA2	Q5A0X8	Surface antigen protein 2 OS=Candida albicans (strain SC5314 / ATCC MYA-2876) OX=237561 GN=CSA2 PE=1 SV=1	18	93	1.70748	251	4	4	0		147	15.1	7.5	1635	14578.2	40.64	0	12.269	cellular homeostasis;transport	extracellular	metal ion binding	Pf05730	3642930	W5Q_03979; I503_04004		-187.048	-527.754	-1.89823	1.48638	-7.54727	-9.04372	-0.924655	0.571801	0.00534622	0.00189482	0.526807	1.48638	0.016509	0.0732688	1	1	0.062299	0.331311	0.584712	0.745435	5.88298e+08	3.14517e+06	8.74433e+08	1.6569e+06
DCW1	Q5AD78	Mannan endo-1,6-alpha-mannosidase DCW1 OS=Candida albicans (strain SC5314 / ATCC MYA-2876) OX=237561 GN=DCW1 PE=1 SV=1	16	247	0.610619	276	5	5	0		452	50.3	4.73	1123	17909.3	84.42	0	45.712	cell organization and biogenesis;metabolic process	membrane	catalytic activity	Pf03663	3638842	W5Q_01581; I503_01575		-2.94787	1.38241	1.62964	-2.50066	-1.55967	0.467188	0.704553	-1.32231	0.339228	1.38241	1.62964	0.399895	0.0165504	0.154207	0.376828	0.0100484	0.0129066	0.0360217	0.132748	0.00664353	1.88026e+07	6.37837e+06	7.51906e+06	1.03944e+07
VIG9; SRB1	O93827	Mannose-1-phosphate guanyltransferase OS=Candida albicans (strain SC5314 / ATCC MYA-2876) OX=237561 GN=MPG1 PE=1 SV=1	20	718	0.0883978	32	5	5	0		362	40	6.3	191	2020.67	10.14	0	18.631	metabolic process	cell surface;cytoplasm;membrane	catalytic activity;nucleotide binding	Pf00132, Pf00483, Pf12804	3647454	W5Q_03300; I503_03301	Amino sugar and nucleotide sugar metabolism; Fructose and mannose metabolism; Metabolic pathways; Biosynthesis of secondary metabolites	2.92021	-7.51929	-2.40406	9.13369	1.54607	-2.9106	-1.26547	3.1912	2.92021	0.132991	0.415964	9.13369	0.0166192	0.186483	0.250977	0.160752	0.0128472	0.271388	0.158802	0.256495	444550	1.29818e+06	4.06039e+06	539996
APE3	A0A1D8PI95	Peptide hydrolase OS=Candida albicans (strain SC5314 / ATCC MYA-2876) OX=237561 GN=APE3 PE=3 SV=1	33	195	0.818182	450	10	10	0		550	60.9	5.08	3594	32207	195.73	0	79.49	metabolic process		catalytic activity;metal ion binding	Pf02225, Pf04389	3643875			-5.45367	1.67162	5.22976	-1.74319	-2.44723	0.741247	2.38674	-0.801728	0.183363	1.67162	5.22976	0.573662	0.0166346	1	0.0944597	0.422689	0.0203543	0.394487	0.112726	0.169441	3.44418e+07	6.31535e+06	1.97579e+07	3.30277e+07
ACP11; ACP12	Q5AHH7	Acyl carrier protein OS=Candida albicans (strain SC5314 / ATCC MYA-2876) OX=237561 GN=ACP12 PE=3 SV=1	30	76	2.07273	228	3	3	0		110	12.3	4.78	1626	14924.7	57.57	0	26.32	metabolic process			Pf00550, Pf14573	3637361	W5Q_01835; I503_01851	Oxidative phosphorylation; Metabolic pathways	-2.77348	-3.47899	5.99157	7.51569	-1.47169	-1.79867	2.58293	2.90991	0.360558	0.28744	5.99157	7.51569	0.0166867	0.501219	0.184111	0.246299	0.0122789	0.450763	0.237773	0.358353	1.71329e+07	6.17742e+06	1.28766e+08	3.70124e+07
RHR2	Q5A7M9	Glycerol-1-phosphatase OS=Candida albicans (strain SC5314 / ATCC MYA-2876) OX=237561 GN=RHR2 PE=4 SV=1	25	858	0.0433071	11	3	3	0		254	28.1	5.81	15	528.42	0	0	8.257	metabolic process;response to stimulus		catalytic activity	Pf00702, Pf13242, Pf13419	3640522	W5Q_02523; I503_02530	Glycerolipid metabolism; Metabolic pathways	-4.11456	-1.71344	3.71121	1.54548	-2.04074	-0.776897	1.89189	0.62805	0.243039	0.583621	3.71121	1.54548	0.0170187	1	0.0413299	1	0.0173654	0.595296	0.0390958	0.649477	377703	91796.7	583731	340677
RAD53	A0A1D8PJZ1	Serine/threonine-protein kinase RAD53 OS=Candida albicans (strain SC5314 / ATCC MYA-2876) OX=237561 GN=RAD53 PE=3 SV=1	3	787	0.0629471	44	1	1	0		699	78.3	6.46	109	2531.59	7.79	0	11.115	metabolic process;regulation of biological process;response to stimulus	nucleus	catalytic activity;DNA binding;nucleotide binding;protein binding	Pf00069, Pf00498, Pf06293, Pf07714, Pf14531	3645633		Meiosis - yeast; Cell cycle - yeast	-4.65775	-1.92346	23.4685	9.6915	-2.21963	-0.943702	4.55265	3.27672	0.214696	0.519897	23.4685	9.6915	0.017266	0.636469	0.0108227	0.047021	0.0191621	0.300319	0.0246359	0.0770373	352387	75656	3.41516e+06	1.77553e+06
EGD2	Q5ANP2	Nascent polypeptide-associated complex subunit alpha OS=Candida albicans (strain SC5314 / ATCC MYA-2876) OX=237561 GN=EGD2 PE=3 SV=1	60	147	1.11798	199	8	8	0	Acetyl [N-Term]	178	19.5	4.82	1826	15656.4	83.63	0	47.15	transport	cell surface;cytoplasm;nucleus		Pf00627, Pf01849	3635284	W5Q_02925; I503_02919		-2.6126	-2.96819	1.88967	2.14687	-1.38549	-1.56958	0.918134	1.10223	0.382761	0.336905	1.88967	2.14687	0.0177579	0.460938	0.417721	0.818096	0.0123017	0.36174	0.191762	0.450866	2.20182e+07	8.42771e+06	4.72702e+07	1.59256e+07
MCA1	Q5ANA8	Metacaspase-1 OS=Candida albicans (strain SC5314 / ATCC MYA-2876) OX=237561 GN=MCA1 PE=3 SV=1	19	384	0.330357	148	6	6	0		448	49.2	5.69	930	10074	63.16	0	28.456	cell death;metabolic process		catalytic activity	Pf00656, Pf01364	3635233	W5Q_03029; I503_03023		-4.64531	-1.55481	18.4028	6.15951	-2.21578	-0.636734	4.20186	2.62281	0.215271	0.643167	18.4028	6.15951	0.0179176	0.727226	0.00227837	0.0171431	0.0198506	0.231525	0.00478668	0.0224816	8.18861e+06	1.76277e+06	5.04378e+07	3.24399e+07
GLO1	Q5ABB2	Lactoylglutathione lyase OS=Candida albicans (strain SC5314 / ATCC MYA-2876) OX=237561 GN=GLO1 PE=3 SV=1	39	213	0.754386	258	9	9	0		342	39.5	6.54	1187	16756.9	92.46	0	68.29			catalytic activity;metal ion binding	Pf00903, Pf12681, Pf13669	3639312	W5Q_00044; I503_00044	Pyruvate metabolism	-5.17703	-3.45008	8.38353	5.58696	-2.37212	-1.78663	3.06756	2.48206	0.193161	0.289848	8.38353	5.58696	0.0179233	0.132732	0.0386417	0.0621721	0.0212582	0.118572	0.0592679	0.0771576	7.56731e+06	1.46171e+06	4.22783e+07	1.22543e+07
PGI1	P83780	Glucose-6-phosphate isomerase OS=Candida albicans (strain SC5314 / ATCC MYA-2876) OX=237561 GN=PGI1 PE=1 SV=2	47	136	1.21455	668	19	19	0		550	61.1	6.4	5114	51572.2	283.55	0	114.233	metabolic process	cytoplasm	catalytic activity	Pf00342	3644847	W5Q_06090; I503_06048	Carbon metabolism; Biosynthesis of antibiotics; Biosynthesis of secondary metabolites; Metabolic pathways; Amino sugar and nucleotide sugar metabolism; Pentose phosphate pathway; Glycolysis / Gluconeogenesis; Starch and sucrose metabolism	-4.76594	-1.85179	3.21501	1.24918	-2.25276	-0.888923	1.68482	0.320984	0.209822	0.540017	3.21501	1.24918	0.0179663	0.742998	0.017455	1	0.0202369	0.330234	0.0147043	0.67338	7.08708e+07	1.48703e+07	8.85305e+07	4.7808e+07
TXL1; CAALFM_C101300WA	Q5A915	Uncharacterized protein OS=Candida albicans (strain SC5314 / ATCC MYA-2876) OX=237561 GN=orf19.3319 PE=4 SV=1	17	194	0.819572	268	5	5	0		327	36.9	4.94	1833	19954.1	128.96	0	33.671	cellular homeostasis;metabolic process;regulation of biological process		catalytic activity	Pf00085, Pf06201, Pf13098, Pf13899, Pf13905, Pf14595	3640185	W5Q_00122; I503_00125		-14.1809	-3.23281	41.2322	9.39968	-3.82588	-1.69279	5.3657	3.23261	0.0705174	0.309328	41.2322	9.39968	0.0180319	0.00892467	0.000186006	0.00185882	0.0344939	0.00755379	0.000499026	0.00300442	1.3811e+07	973916	1.29819e+08	4.01567e+07
PSA1; PSA2	Q5AL34	Psa2p OS=Candida albicans (strain SC5314 / ATCC MYA-2876) OX=237561 GN=PSA2 PE=4 SV=1	13	838	0.0480349	22	5	5	0		458	50.8	5.63	115	1188.76	1.61	0	19.4	metabolic process		catalytic activity	Pf00132, Pf00483, Pf12804	3636159	W5Q_01271; I503_01294	Metabolic pathways; Biosynthesis of secondary metabolites; Amino sugar and nucleotide sugar metabolism; Fructose and mannose metabolism	5.65672	-4.61266	1.30547	34.0629	2.49997	-2.2056	0.384566	5.09013	5.65672	0.216795	1.30547	34.0629	0.0184296	0.236162	1	0.0698474	0.0230367	0.260439	0.542325	0.177766	56113.8	317420	1.9114e+06	414381
NPL4	Q5AA50	Nuclear protein localization protein 4 OS=Candida albicans (strain SC5314 / ATCC MYA-2876) OX=237561 GN=NPL4 PE=3 SV=1	3	848	0.0451505	27	1	1	0		598	67.3	6.29	236	1778.66	10.69	0	9.82	metabolic process;transport	cytoplasm;endoplasmic reticulum;membrane;nucleus		Pf05020, Pf05021, Pf11543	3639820		Protein processing in endoplasmic reticulum	-6.66251	-3.23495	6.03771	2.93158	-2.73607	-1.69374	2.594	1.55168	0.150094	0.309124	6.03771	2.93158	0.0184519	0.00129219	0.00692054	0.00402973	0.0252428	0.00109432	0.00897594	0.00312642	774558	116256	2.27068e+06	701921
CPR51; CYP5	A0A1D8PKL0	Peptidyl-prolyl cis-trans isomerase (Fragment) OS=Candida albicans (strain SC5314 / ATCC MYA-2876) OX=237561 GN=CYP5 PE=3 SV=1	48	43	3.40099	687	10	10	0		202	22.3	6.55	5372	51901.8	462.19	0	61.931	metabolic process	extracellular	catalytic activity	Pf00160	3642257			-50.3636	-1.05567	115.512	2.42124	-5.65431	-0.0781585	6.8519	1.27575	0.0198556	0.947266	115.512	2.42124	0.0185944	1	0.0042664	0.425687	0.0525691	0.91981	0.0146164	0.271535	2.92253e+08	5.80286e+06	7.07614e+08	6.70299e+08
ARG1	A0A1D8PRR5	Argininosuccinate synthase OS=Candida albicans (strain SC5314 / ATCC MYA-2876) OX=237561 GN=ARG1 PE=3 SV=1	6	1004	0.0168269	7	2	2	0		416	46.1	5.16	71	288.89	1.99	0.003	4.554	metabolic process		catalytic activity;nucleotide binding	Pf00733, Pf00764, Pf03054, Pf06508	3639691		Metabolic pathways; Arginine biosynthesis; Biosynthesis of amino acids; Biosynthesis of secondary metabolites; Biosynthesis of antibiotics; Alanine, aspartate and glutamate metabolism	-4.73075	-10.5262	5.02334	11.1772	-2.24207	-3.39591	2.32865	3.48249	0.211383	0.0950014	5.02334	11.1772	0.0187073	0.230209	0.148215	0.222742	0.0209715	0.390884	0.17257	0.387848	199986	42273.6	2.23528e+06	212355
FIS1; CAALFM_C700120WA	Q5AFF7	Mitochondrial fission 1 protein OS=Candida albicans (strain SC5314 / ATCC MYA-2876) OX=237561 GN=FIS1 PE=3 SV=2	30	255	0.584416	90	4	4	0		154	17.4	8.27	740	5659.8	10.2	0	12.161	cell organization and biogenesis	membrane;mitochondrion	protein binding	Pf14852, Pf14853	3637976	W5Q_05067; I503_05023	Mitophagy - yeast	-873.421	-1.03118	6773.54	7.99697	-9.77053	-0.0442943	12.7257	2.99945	0.00114492	0.969764	6773.54	7.99697	0.0188481	1	0.000619746	0.0207787	0.0920782	0.926684	0.00394335	0.0311624	1.45204e+06	1662.47	1.16119e+07	1.12608e+07
CDC3	A0A1D8PD83	Septin OS=Candida albicans (strain SC5314 / ATCC MYA-2876) OX=237561 GN=CDC3 PE=3 SV=1	27	340	0.39486	169	7	6	1		428	49	6.44	1212	10838.8	42.86	0	38.178		cytoskeleton	nucleotide binding	Pf00735	3644719	W5Q_00410; I503_00413		-2.11508	-1.82998	2.42881	2.10142	-1.08071	-0.871826	1.28025	1.07137	0.472796	0.546455	2.42881	2.10142	0.0188831	0.909483	0.360066	0.530194	0.0102036	0.396455	0.230487	0.284016	6.58661e+06	3.11413e+06	1.38413e+07	7.56362e+06
CaO19.2568; IFU5	A0A1D8PS14	Ifu5p OS=Candida albicans (strain SC5314 / ATCC MYA-2876) OX=237561 GN=IFU5 PE=4 SV=1	31	223	0.711864	168	4	4	0		236	26	4.7	1198	10502.5	85.94	0	43.46		membrane	protein binding	Pf00397	3640116			-3.45406	-1.45048	22.9677	9.64493	-1.78829	-0.536529	4.52153	3.26977	0.289515	0.689428	22.9677	9.64493	0.0191857	1	0.0107333	0.0943657	0.0171548	0.598457	0.0242654	0.154277	2.18882e+06	633695	2.1111e+07	1.45545e+07
NIC96; CAALFM_C201220WA	A0A1D8PGB0	Nuclear pore protein OS=Candida albicans (strain SC5314 / ATCC MYA-2876) OX=237561 GN=orf19.2002 PE=3 SV=1	6	988	0.0197917	19	3	3	0		960	108.6	6.81	74	1058.08	0	0	11.65	transport	membrane;nucleus		Pf04097	3638856		RNA transport	-16.7769	-7.67402	9.62571	4.40296	-4.0684	-2.93998	3.26689	2.13847	0.0596058	0.13031	9.62571	4.40296	0.0193284	0.192636	0.014804	0.312795	0.039318	0.283174	0.0241816	0.334452	578755	34497.1	2.54823e+06	332060
EXG2	Q5AIA1	Glucan 1,3-beta-glucosidase 2 OS=Candida albicans (strain SC5314 / ATCC MYA-2876) OX=237561 GN=EXG2 PE=1 SV=2	26	219	0.732777	351	12	12	0		479	54.5	5.53	2030	26740.1	148.67	0	63.827	cell organization and biogenesis;metabolic process	extracellular;membrane	catalytic activity	Pf00150, Pf02449	3636816	W5Q_00253	Starch and sucrose metabolism	-6.0505	-1.10279	2.67033	-2.05464	-2.59706	-0.141152	1.41702	-1.03889	0.165276	0.906795	2.67033	0.486703	0.0194895	1	0.371466	0.320201	0.0253076	0.88023	0.263187	0.166326	1.22513e+08	2.02483e+07	5.96273e+07	5.40697e+07
FZD3; IFR2	A0A1D8PSE7	Ifr2p OS=Candida albicans (strain SC5314 / ATCC MYA-2876) OX=237561 GN=IFR2 PE=4 SV=1	28	515	0.195531	70	6	6	0		358	38.5	6.29	335	5322.46	36.24	0	25.012	metabolic process		catalytic activity	Pf00107, Pf08240	3645100	I503_05740		-3.8063	-1.66048	20.8647	9.10216	-1.92839	-0.731604	4.383	3.18621	0.262722	0.602234	20.8647	9.10216	0.0195045	1	0.00160968	0.0949648	0.0188061	0.479619	0.00352761	0.151289	1.51596e+06	398276	1.37985e+07	8.30992e+06
VMA5	Q5A2U9	V-type proton ATPase subunit C OS=Candida albicans (strain SC5314 / ATCC MYA-2876) OX=237561 GN=VMA5 PE=3 SV=1	15	409	0.296392	115	5	5	0		388	44.7	6.21	750	7026.09	27.72	0	24.329	transport	membrane	transporter activity	Pf03223	3642316	W5Q_02240; I503_02251	Phagosome; Oxidative phosphorylation; Metabolic pathways	-5.3465	-1.10998	20.9826	4.35618	-2.41859	-0.150538	4.39112	2.12306	0.187038	0.900914	20.9826	4.35618	0.0197332	1	0.0118423	0.123669	0.0238633	0.844611	0.0260005	0.131278	2.20495e+06	412410	9.60516e+06	8.65343e+06
RPS21B	A0A1D8PCG7	40S ribosomal protein S21 OS=Candida albicans (strain SC5314 / ATCC MYA-2876) OX=237561 GN=RPS21B PE=3 SV=1	80	28	4.5977	400	8	8	0	Acetyl [N-Term]	87	9.6	8.15	3609	28099.4	142.42	0	51.963	metabolic process	cytoplasm;ribosome	structural molecule activity	Pf01249	30514961	W5Q_00129; I503_00132		-3.26399	-3.49026	4.13563	4.42234	-1.70664	-1.80334	2.04811	2.14481	0.306374	0.286511	4.13563	4.42234	0.0197591	0.253445	0.0020481	0.185299	0.0168608	0.228524	0.00209736	0.198715	8.29316e+07	2.54081e+07	3.66752e+08	1.05078e+08
TOM20	Q5AIA0	Tom20p OS=Candida albicans (strain SC5314 / ATCC MYA-2876) OX=237561 GN=TOM20 PE=3 SV=1	46	68	2.25731	386	6	6	0		171	19	8.46	2222	25166.5	172.21	0	54.275	transport	membrane;mitochondrion		Pf02064	3636817	W5Q_00254; I503_00253		-10.1565	-3.57734	26.4798	9.3268	-3.34433	-1.83889	4.72682	3.22138	0.0984593	0.279537	26.4798	9.3268	0.0197633	0.0881129	0.00194803	0.0274989	0.0330475	0.081015	0.004604	0.0442923	1.53469e+07	1.51105e+06	1.43138e+08	4.00123e+07
LHP1	A0A1D8PE36	Lhp1p OS=Candida albicans (strain SC5314 / ATCC MYA-2876) OX=237561 GN=LHP1 PE=4 SV=1	4	519	0.188272	61	1	1	0		324	37.6	5.48	630	4875.36	31.29	0	9.389	metabolic process	nucleus	RNA binding	Pf05383	3646665			-7.5601	-7.39222	1.24539	1.21774	-2.9184	-2.88601	0.316598	0.284202	0.132273	0.135277	1.24539	1.21774	0.0200731	0.0822851	1	1	0.0292908	0.118738	0.575201	0.730777	5.63936e+06	745937	6.86725e+06	928983
WWM1; CAALFM_C404330CA	A0A1D8PM15	Uncharacterized protein OS=Candida albicans (strain SC5314 / ATCC MYA-2876) OX=237561 GN=orf19.1414 PE=4 SV=1	28	205	0.790698	238	5	5	0		301	31.6	6.73	1058	13993.4	77.41	0	53.166			protein binding	Pf00397	3646840	W5Q_03736; I503_03730		-5.48157	-1.75758	18.6464	5.97868	-2.45459	-0.813594	4.22082	2.57983	0.18243	0.568963	18.6464	5.97868	0.0202384	1	0.000448858	0.125234	0.0248384	0.426957	0.000947275	0.161542	1.0702e+07	1.95235e+06	6.39836e+07	3.64043e+07
SEC22	A0A1D8PSL3	SNAP receptor OS=Candida albicans (strain SC5314 / ATCC MYA-2876) OX=237561 GN=SEC22 PE=3 SV=1	22	510	0.199074	43	3	3	0		216	25.1	8.87	145	2315.22	2.14	0	11.945	transport	membrane		Pf00957, Pf13774	30515391	W5Q_05828; I503_05810		-816.892	-2.29042	1061.58	2.97647	-9.674	-1.19561	10.052	1.5736	0.00122415	0.436602	1061.58	2.97647	0.0203101	0.329208	0.0128512	0.173238	0.0982401	0.196802	0.0645899	0.136304	1.35806e+06	1662.47	4.04222e+06	1.76484e+06
RPA12	A0A1D8PHV8	DNA-directed RNA polymerase subunit OS=Candida albicans (strain SC5314 / ATCC MYA-2876) OX=237561 GN=RPA12 PE=3 SV=1	9	834	0.0487805	6	2	2	0		123	13.5	8.29	73	320.78	0	0.002	5.76	metabolic process	nucleus	catalytic activity;metal ion binding	Pf01096	3643477	W5Q_02150	Metabolic pathways; Purine metabolism; Pyrimidine metabolism; RNA polymerase	-5.21703	-67.6627	7.66079	99.3571	-2.38323	-6.08029	2.93749	6.63455	0.19168	0.0147792	7.66079	99.3571	0.0206137	0.124885	0.271385	0.113822	0.0245636	0.379667	0.398596	0.377579	13797.6	2644.73	1.37089e+06	20260.7
GRS1	Q5A2A5	Glycine--tRNA ligase OS=Candida albicans (strain SC5314 / ATCC MYA-2876) OX=237561 GN=GRS1 PE=4 SV=1	11	650	0.116564	76	6	6	0		652	73.7	5.68	549	6383.01	68.27	0	37.205	metabolic process	cytoplasm	catalytic activity;nucleotide binding	Pf00587, Pf03129	3642474	W5Q_00516; I503_00519	Aminoacyl-tRNA biosynthesis	-12.3188	-5.24237	3.02765	1.28844	-3.6228	-2.39022	1.5982	0.365625	0.0811764	0.190753	3.02765	1.28844	0.0208777	0.107448	0.0900874	1	0.0378178	0.128412	0.0719889	0.665463	1.03412e+07	839458	1.3324e+07	2.54159e+06
RPS28B	A0A1D8PQN0	Ribosomal 40S subunit protein S28B OS=Candida albicans (strain SC5314 / ATCC MYA-2876) OX=237561 GN=RPS28B PE=3 SV=1	24	476	0.223881	15	2	2	0		67	7.5	10.36	160	739.91	1.68	0.002	5.719	metabolic process	ribosome	structural molecule activity	Pf01200	30515349	W5Q_05124; I503_05080		-16.4638	-21.2729	10.4045	13.4437	-4.04123	-4.41094	3.37914	3.74885	0.0607393	0.0470082	10.4045	13.4437	0.0214046	0.170182	0.113679	0.206892	0.0432505	0.375331	0.192068	0.387803	800360	48613.3	1.07598e+07	505798
CaO19.5949; FAS2	A0A1D8PK65	Fatty acid synthase subunit alpha OS=Candida albicans (strain SC5314 / ATCC MYA-2876) OX=237561 GN=FAS2 PE=3 SV=1	18	418	0.286624	540	23	23	0		1884	207.2	5.54	3592	33559.7	152.58	0	120.072	metabolic process		catalytic activity;metal ion binding	Pf00106, Pf00109, Pf01648, Pf02801, Pf13561	3635222	W5Q_02992; I503_02986	Metabolic pathways; Fatty acid biosynthesis; Fatty acid metabolism	-2.55618	-3.42925	1.79639	2.40994	-1.35399	-1.77789	0.845097	1.269	0.391208	0.291609	1.79639	2.40994	0.0214107	0.318138	0.744588	0.563906	0.0144949	0.282808	0.314625	0.357798	3.19428e+07	1.24963e+07	7.69804e+07	2.24482e+07
CAALFM_C304590WA	A0A1D8PK11	RNA-binding protein OS=Candida albicans (strain SC5314 / ATCC MYA-2876) OX=237561 GN=orf19.5917.3 PE=4 SV=1	23	399	0.312775	71	4	4	0		227	24	10.14	325	3533.2	2	0	12.961			RNA binding	Pf00076, Pf14259	30515204	W5Q_02968; I503_02962		-2.56113	-4.30136	4.98455	8.37143	-1.35678	-2.10479	2.31746	3.06547	0.390452	0.232485	4.98455	8.37143	0.0215475	0.126214	0.025634	0.0618845	0.0146177	0.132827	0.029703	0.0948526	1.34064e+06	523457	1.12231e+07	2.6092e+06
ECM14	A0A1D8PJK3	Putative metallocarboxypeptidase OS=Candida albicans (strain SC5314 / ATCC MYA-2876) OX=237561 GN=ECM14 PE=4 SV=1	19	627	0.12766	60	5	5	0		470	54.2	5.21	445	5755.58	50.75	0	34.675	metabolic process		catalytic activity;metal ion binding	Pf00246	3638392	W5Q_02816; I503_02803		-24.1666	-272.287	-16.1853	-1.43651	-4.59494	-8.08898	-4.01661	-0.522573	0.0413794	0.00367259	0.0617844	0.696129	0.0216892	0.00874015	0.00425822	1	0.0498304	0.0353495	0.00855181	0.499772	4.17258e+06	172659	2.90465e+06	10667.6
IDI1	A0A1D8PLI2	Isopentenyl-diphosphate delta-isomerase OS=Candida albicans (strain SC5314 / ATCC MYA-2876) OX=237561 GN=IDI1 PE=4 SV=1	47	127	1.28521	365	13	13	0		284	32.3	4.97	1810	25115.2	129.78	0	73.739	metabolic process		catalytic activity	Pf00293	3637894	I503_03520	Biosynthesis of secondary metabolites; Biosynthesis of antibiotics; Terpenoid backbone biosynthesis; Metabolic pathways	-7.27114	-6.28362	7.52354	6.50175	-2.86218	-2.6516	2.91141	2.70083	0.13753	0.159144	7.52354	6.50175	0.0218806	0.0951757	0.0039601	0.0926777	0.0313131	0.126184	0.00576473	0.125153	1.63009e+07	2.24186e+06	1.05984e+08	1.68667e+07
CaO19.11518; CaO19.4035; PGA4	Q5AJY5	1,3-beta-glucanosyltransferase PGA4 OS=Candida albicans (strain SC5314 / ATCC MYA-2876) OX=237561 GN=PGA4 PE=1 SV=1	15	290	0.498891	225	7	7	0		451	49	4.74	1988	15931.5	100.55	0	43.916	cell organization and biogenesis;response to stimulus	cell surface;extracellular;membrane	catalytic activity	Pf03198	3636406	W5Q_04558; I503_04556		-6.13592	-2.61301	1.53794	-1.52686	-2.61728	-1.38571	0.620997	-0.610568	0.162975	0.3827	1.53794	0.654939	0.0219556	0.353327	0.0524852	1	0.028732	0.244805	0.0162966	0.423683	5.66065e+07	9.22544e+06	3.70738e+07	1.41882e+07
CaO19.2200; CAALFM_C207810WA; CaO19.9746	Q5A2K5	Uncharacterized protein OS=Candida albicans (strain SC5314 / ATCC MYA-2876) OX=237561 GN=orf19.2200 PE=4 SV=1	10	955	0.0252294	11	2	2	0		436	50.5	9.01	36	409.83	0	0.002	5.516		membrane		Pf03388	3642324			-97.4627	-21.784	1.17926	-3.79394	-6.60678	-4.4452	0.237887	-1.9237	0.0102603	0.0459053	1.17926	0.263579	0.0219687	0.167459	1	0.207086	0.0725711	0.372195	0.504193	0.199185	162029	1662.47	42707.3	1960.49
CaO19.754; YBN5	A0A1D8PDE8	Obg-like ATPase 1 OS=Candida albicans (strain SC5314 / ATCC MYA-2876) OX=237561 GN=YBN5 PE=3 SV=1	8	701	0.0959596	38	2	2	0		396	44.3	5.95	91	2297.45	4.17	0	7.384		cytoplasm	catalytic activity;nucleotide binding	Pf01926, Pf06071	3644781	W5Q_00479		-1.70537	-1.42398	1.18542	-1.01028	-0.770084	-0.509927	0.245403	-0.0147534	0.586383	0.702258	1.18542	0.989826	0.0220327	1	1	1	0.00848352	0.532471	0.462255	0.981811	1.64468e+06	964412	1.62794e+06	1.14324e+06
CaO19.12359; CaO19.4894; CAALFM_C110240CA	Q5AP69	Bifunctional 4-hydroxy-4-methyl-2-oxoglutarate aldolase/oxaloacetate decarboxylase OS=Candida albicans (strain SC5314 / ATCC MYA-2876) OX=237561 GN=orf19.4894 PE=4 SV=1	42	398	0.315574	77	5	5	0		244	26.3	7.31	275	5399.56	14.88	0	27.153				Pf03737	3634881			-9.42446	-3.26991	58.7774	20.3934	-3.23641	-1.70925	5.87719	4.35003	0.106107	0.305819	58.7774	20.3934	0.0221374	0.0791817	0.000801712	0.0120254	0.0358229	0.0676707	0.00235591	0.0261555	1.07472e+06	114035	2.19172e+07	6.7027e+06
END3	Q5AJ82	Actin cytoskeleton-regulatory complex protein END3 OS=Candida albicans (strain SC5314 / ATCC MYA-2876) OX=237561 GN=END3 PE=2 SV=1	32	267	0.55443	219	10	10	0		395	45	5.03	1643	13843.5	43.85	0	43.183	cell organization and biogenesis;transport	cytoplasm;cytoskeleton;endosome;membrane	metal ion binding;protein binding	Pf00036, Pf12761, Pf12763, Pf13499, Pf13833	3636644	W5Q_02629; I503_02635		-23.1084	-1.36886	151.639	8.98256	-4.53035	-0.452974	7.2445	3.16713	0.0432743	0.730536	151.639	8.98256	0.0221475	1	0.0242244	0.060287	0.050168	0.631341	0.0877469	0.0954682	8.88058e+06	384301	7.97703e+07	5.82751e+07
GAL1	Q59VY8	Galactokinase OS=Candida albicans (strain SC5314 / ATCC MYA-2876) OX=237561 GN=GAL1 PE=4 SV=1	9	573	0.157282	81	3	3	0		515	57.1	5.33	866	7051.5	43.55	0	19.709	metabolic process;transport	cytoplasm	catalytic activity;nucleotide binding	Pf00288, Pf08544, Pf10509	3644581	I503_00203	Galactose metabolism; Amino sugar and nucleotide sugar metabolism; Metabolic pathways	-12.5847	-1.83041	22.3256	3.2472	-3.6536	-0.872167	4.48063	1.6992	0.0794616	0.546326	22.3256	3.2472	0.0221644	1	0.0272484	0.368797	0.0404899	0.508997	0.0610449	0.313329	2.7124e+06	215531	8.80768e+06	4.81186e+06
CaO19.338; CAALFM_C303410CA; CaO19.7971	Q5AED0	Uncharacterized protein OS=Candida albicans (strain SC5314 / ATCC MYA-2876) OX=237561 GN=orf19.338 PE=4 SV=1	5	1011	0.0152818	16	4	4	0		1047	121.2	5.41	104	887.02	0	0	11.138	metabolic process		catalytic activity	Pf03200	3638353	W5Q_02848; I503_02835		-5.30823	-1.39961	20.2812	5.34749	-2.40823	-0.485023	4.34207	2.41886	0.188387	0.714486	20.2812	5.34749	0.02222	1	0.075689	0.330302	0.0267555	0.778717	0.164324	0.399477	360717	67954.3	1.92893e+06	1.37819e+06
APL4	A0A1D8PSB0	AP-1 complex subunit gamma OS=Candida albicans (strain SC5314 / ATCC MYA-2876) OX=237561 GN=APL4 PE=3 SV=1	2	763	0.0688406	57	1	1	0		828	91.4	7.59	250	3452.28	19.75	0	8.75	transport	cytoplasm;Golgi;membrane	transporter activity	Pf01602, Pf02883	3642565			-6.60984	-2.52496	15.4245	5.89214	-2.72461	-1.33626	3.94715	2.55879	0.15129	0.396046	15.4245	5.89214	0.0224001	0.00100762	0.000163864	0.000226264	0.0305159	0.000673224	0.000323397	0.000289482	1.80193e+06	272614	1.06173e+07	4.20492e+06
CaO19.6553; CAALFM_C701710WA	A0A1D8PQW4	Uncharacterized protein OS=Candida albicans (strain SC5314 / ATCC MYA-2876) OX=237561 GN=orf19.6553 PE=4 SV=1	24	333	0.40458	159	6	6	0		393	44.2	7.21	1538	12583.1	93.48	0	50.461		membrane	protein binding	Pf00008, Pf12955	3637012	W5Q_05214; I503_05173		-120.461	-10.1913	5.02907	-2.35032	-6.91242	-3.34927	2.33029	-1.23286	0.00830147	0.0981228	5.02907	0.425473	0.0225127	0.0234016	0.0859574	0.423043	0.0778086	0.0391891	0.100153	0.260776	2.19241e+07	182002	9.3281e+06	915300
CaO19.4248; CAALFM_C502400WA	Q5AGD1	Acyl-protein thioesterase 1 OS=Candida albicans (strain SC5314 / ATCC MYA-2876) OX=237561 GN=CAALFM_C502400WA PE=3 SV=2	56	173	0.948052	219	7	7	0		231	25.3	6.39	1579	16600.2	116.5	0	54.189	metabolic process	cytoplasm	catalytic activity	Pf00561, Pf02230, Pf03959, Pf12695, Pf12697	3637724			-18.5789	-3.64558	33.3022	6.53463	-4.21559	-1.86615	5.05755	2.70811	0.0538246	0.274305	33.3022	6.53463	0.0225695	0.177799	0.000197841	0.089325	0.0475718	0.1659	0.000500295	0.120951	9.24557e+06	497639	6.04164e+07	1.65725e+07
SES1	Q9HGT6	Serine--tRNA ligase, cytoplasmic OS=Candida albicans (strain SC5314 / ATCC MYA-2876) OX=237561 GN=SES1 PE=1 SV=1	4	859	0.04329	20	2	2	0		462	53	5.73	96	1189.43	5.16	0	10.113	metabolic process	cytoplasm	catalytic activity;nucleotide binding	Pf00587, Pf02403	3638415		Aminoacyl-tRNA biosynthesis	-5.30316	-6.0632	-1.78649	-1.56255	-2.40685	-2.60008	-0.837129	-0.643904	0.188567	0.16493	0.559756	0.639979	0.0225831	0.0486247	1	0.935274	0.0271771	0.063214	0.421665	0.301113	1.03784e+06	195703	664198	109546
CaO19.415; CAALFM_C105490CA; CaO19.8045	Q5A2C6	MICOS complex subunit OS=Candida albicans (strain SC5314 / ATCC MYA-2876) OX=237561 GN=orf19.415 PE=4 SV=1	11	960	0.0241935	6	2	2	0		248	27.2	7.55	48	387.03	0	0	6.576	cell organization and biogenesis;transport	membrane;mitochondrion	transporter activity	Pf05052, Pf09769	3642507	W5Q_00535; I503_00538		-14.3049	-15.6407	37.0492	40.509	-3.83844	-3.96723	5.21137	5.34017	0.0699062	0.0639358	37.0492	40.509	0.0228709	0.201878	0.143612	0.143071	0.0438943	0.400448	0.374209	0.382012	23781.4	1662.47	963360	61593.2
TIF34	Q5AI86	Eukaryotic translation initiation factor 3 subunit I OS=Candida albicans (strain SC5314 / ATCC MYA-2876) OX=237561 GN=TIF34 PE=3 SV=1	37	302	0.471429	165	8	8	0		350	38.2	5.47	1171	10918	70.88	0	46.879	metabolic process;response to stimulus	cytoplasm	protein binding;RNA binding	Pf00400, Pf10282	3636872	W5Q_00269	RNA transport	-1.76258	-2.60691	1.48785	2.20058	-0.817687	-1.38234	0.57323	1.13788	0.567351	0.383596	1.48785	2.20058	0.023103	0.447843	0.020526	0.637074	0.0094455	0.309536	0.00588305	0.362458	6.30842e+06	3.57909e+06	1.38822e+07	5.32515e+06
DDR48	Q59X49	Stress protein DDR48 OS=Candida albicans (strain SC5314 / ATCC MYA-2876) OX=237561 GN=DDR48 PE=1 SV=1	87	373	0.349057	74	12	12	0		212	22.6	4.61	461	4415.09	19.96	0	45.606	cell communication;metabolic process;response to stimulus	cell surface;extracellular			3644061	W5Q_02343; I503_02349		-26.4853	-8.8314	30.0898	10.0333	-4.72712	-3.14264	4.9112	3.32673	0.0377568	0.113232	30.0898	10.0333	0.0232054	0.248788	0.0864182	0.230472	0.0548474	0.390926	0.212209	0.383359	4.53535e+06	171240	4.55046e+07	5.1526e+06
CAP100; CAALFM_CR09330CA	A0A1D8PTZ1	Uncharacterized protein OS=Candida albicans (strain SC5314 / ATCC MYA-2876) OX=237561 GN=CAALFM_CR09330CA PE=4 SV=1	18	533	0.18091	163	13	13	0		901	100	8.24	805	8831.29	35.68	0	51.962	regulation of biological process			Pf00565, Pf00567	3641899	W5Q_06381; I503_06327		-2.66333	-2.21204	8.4148	6.98896	-1.41323	-1.14538	3.07293	2.80508	0.37547	0.452071	8.4148	6.98896	0.0232619	0.643468	0.00438759	0.131995	0.0164372	0.368507	0.00674138	0.185129	2.73983e+06	1.02873e+06	1.91486e+07	8.65652e+06
YPD1	Q59WC6	Phosphorelay intermediate protein YPD1 OS=Candida albicans (strain SC5314 / ATCC MYA-2876) OX=237561 GN=YPD1 PE=3 SV=1	26	479	0.222826	41	3	3	0		184	20.6	4.42	24	1767.83	0	0	10.454	regulation of biological process;response to stimulus	cytoplasm;cytosol;nucleus	catalytic activity;signal transducer activity	Pf01627	3644458	W5Q_00703; I503_00707	MAPK signaling pathway - yeast	-9.20586	-1.42998	14.5803	2.26481	-3.20255	-0.515997	3.86594	1.17939	0.108626	0.699309	14.5803	2.26481	0.0233058	1	0.00915768	0.0903358	0.037319	0.265032	0.0177016	0.0532705	759367	82487.3	1.71982e+06	1.20269e+06
TPS1	Q92410	Alpha,alpha-trehalose-phosphate synthase [UDP-forming] OS=Candida albicans (strain SC5314 / ATCC MYA-2876) OX=237561 GN=TPS1 PE=1 SV=1	3	921	0.0313808	15	1	1	0		478	54.4	6.23	34	500.05	0	0.003	4.173	metabolic process;response to stimulus		catalytic activity	Pf00534, Pf00982, Pf13692	3646699	W5Q_06032; I503_05988	Metabolic pathways; Starch and sucrose metabolism	-6.17235	1.12955	2.76471	-2.52177	-2.62582	0.175746	1.46713	-1.33444	0.162013	1.12955	2.76471	0.396547	0.0233335	1	0.129845	0.0996826	0.0306348	0.633116	0.0952495	0.06651	565708	91652	224330	253392
RBT99; RBT1	Q59TP1	Cell wall protein RTB1 OS=Candida albicans (strain SC5314 / ATCC MYA-2876) OX=237561 GN=RBT1 PE=1 SV=2	13	367	0.356449	257	6	6	0		721	73.6	4.34	1967	18136.5	99.44	0	44.029	cell organization and biogenesis	cell surface;extracellular;membrane		Pf10182	3645377			-3.34603	1.6006	6.60499	1.23328	-1.74245	0.67861	2.72356	0.302495	0.298861	1.6006	6.60499	1.23328	0.0235607	0.413403	0.002517	1	0.0205267	0.14027	0.0034276	0.546239	1.08419e+07	3.24022e+06	1.3371e+07	2.14016e+07
TIM10	A0A1D8PLH1	Protein transporter OS=Candida albicans (strain SC5314 / ATCC MYA-2876) OX=237561 GN=TIM10 PE=4 SV=1	11	776	0.0659341	6	1	1	0		91	10.1	7.05	69	454.48	0	0	7.287	transport	mitochondrion	metal ion binding	Pf02953	30515247	W5Q_03514; I503_03506		-27.0807	-33.3609	9.89483	12.1895	-4.75919	-5.06009	3.30668	3.60757	0.0369266	0.0299752	9.89483	12.1895	0.0240001	0.152138	0.240454	0.226502	0.0571106	0.384916	0.397552	0.40856	99059.4	3657.93	1.20748e+06	36194.6
MNT1	Q00310	Glycolipid 2-alpha-mannosyltransferase 1 OS=Candida albicans (strain SC5314 / ATCC MYA-2876) OX=237561 GN=MNT1 PE=3 SV=1	26	361	0.366589	158	8	8	0		431	50	6.9	1536	11884.8	95.96	0	40.176	cell organization and biogenesis;metabolic process;response to stimulus	extracellular;Golgi;membrane	catalytic activity	Pf01793	3636585	W5Q_02669; I503_02675	Other types of O-glycan biosynthesis	-3.39719	-2.27713	-1.67186	-2.4942	-1.76434	-1.18722	-0.741451	-1.31858	0.294361	0.439149	0.598137	0.400931	0.0241634	0.646211	0.31047	0.168458	0.0213163	0.383597	0.115099	0.111062	1.17748e+07	3.46604e+06	4.72089e+06	2.07317e+06
RPL14	A0A1D8PFL9	Ribosomal 60S subunit protein L14B OS=Candida albicans (strain SC5314 / ATCC MYA-2876) OX=237561 GN=RPL14 PE=4 SV=1	32	71	2.20611	289	5	5	0		131	14.7	10.9	2285	20260.2	144.65	0	23.987	metabolic process	cell surface;ribosome	structural molecule activity	Pf01929	30515072	W5Q_01260; I503_01283		-3.6586	-1.52956	3.34179	1.39712	-1.87129	-0.61312	1.74062	0.482451	0.273329	0.653781	3.34179	1.39712	0.0244172	0.492375	0.0155319	1	0.0228458	0.150942	0.0135176	0.26112	1.81162e+07	4.95168e+06	2.53104e+07	1.65475e+07
LHS1	A0A1D8PGU0	Hsp70 family chaperone OS=Candida albicans (strain SC5314 / ATCC MYA-2876) OX=237561 GN=LHS1 PE=3 SV=1	10	862	0.0429185	40	5	5	0		932	104.7	5.05	336	2911.82	18.44	0	30.854			nucleotide binding	Pf00012	3643032		Protein processing in endoplasmic reticulum	-7.12073	-19.5657	-7.04964	-2.56565	-2.83202	-4.29025	-2.81755	-1.35932	0.140435	0.05111	0.141851	0.389765	0.0244639	0.00749055	0.0329843	0.145937	0.0346411	0.0160682	0.0464674	0.0991881	2.80566e+06	394013	1.09355e+06	55891.2
KAP95; CAALFM_C102240WA	Q59VX7	Karyopherin beta OS=Candida albicans (strain SC5314 / ATCC MYA-2876) OX=237561 GN=orf19.3681 PE=4 SV=1	4	911	0.0331429	29	2	2	0	Acetyl [N-Term]	875	96.5	4.58	399	2287.69	15.26	0	12.083	transport	cytoplasm;membrane;nucleus	protein binding;transporter activity	Pf03810, Pf13513, Pf13646	3644597	W5Q_00212; I503_00214	RNA transport	-11.4239	-1.61566	45.8132	6.47929	-3.51398	-0.692128	5.51769	2.69584	0.0875358	0.61894	45.8132	6.47929	0.0245919	0.75019	0.000121734	0.0320473	0.0432078	0.259614	0.000335845	0.0431971	249712	21858.8	1.61796e+06	1.00142e+06
RPS16A	A0A1D8PCW6	Ribosomal 40S subunit protein S16A OS=Candida albicans (strain SC5314 / ATCC MYA-2876) OX=237561 GN=RPS16A PE=3 SV=1	13	429	0.274648	39	2	2	0		142	15.7	10.29	190	2031.21	1.64	0	7.314	metabolic process	ribosome	structural molecule activity	Pf00380	30514974	W5Q_00293; I503_00292		7.4453	2.31242	-2.90728	1.10746	2.89633	1.2094	-1.53967	0.147256	7.4453	2.31242	0.343964	1.10746	0.0246908	0.675176	0.112504	1	0.0357563	0.40828	0.0866096	0.944422	261201	1.94472e+06	289270	668912
ROT2	Q5A4X3	Glucan 1\3-alpha-glucosidase ROT2 OS=Candida albicans (strain SC5314 / ATCC MYA-2876) OX=237561 GN=ROT2 PE=3 SV=1	2	983	0.0206659	18	1	1	0		871	100	5.81	95	832.88	0	0.003	4.155	metabolic process;regulation of biological process;response to stimulus	organelle lumen	catalytic activity	Pf01055, Pf13802	3641566	W5Q_04060; I503_04058	N-Glycan biosynthesis; Protein processing in endoplasmic reticulum; Metabolic pathways	-463.94	-6.07016	106.535	1.3939	-8.8578	-2.60173	6.73519	0.479124	0.00215545	0.16474	106.535	1.3939	0.0248975	0.0418776	0.00330877	1	0.110269	0.0544772	0.0111426	0.577131	771286	1662.47	1.07509e+06	177111
PLB1	Q9UWF6	Lysophospholipase 1 OS=Candida albicans (strain SC5314 / ATCC MYA-2876) OX=237561 GN=PLB1 PE=1 SV=1	6	762	0.0694215	42	2	2	0		605	66.4	4.87	127	2061.75	2.18	0	8.117	metabolic process	extracellular	catalytic activity	Pf01735	3644561	W5Q_04778; I503_04761	Glycerophospholipid metabolism	5.88542	28.3151	-1.27527	-6.13541	2.55715	4.8235	-0.350806	-2.61716	5.88542	28.3151	0.784146	0.162988	0.0249642	0.0109796	1	0.19615	0.0319185	0.02648	0.538015	0.256678	319830	1.88234e+06	52128.5	1.47603e+06
CaJ7_0477; SUI3	A0A1D8PRJ6	Translation initiation factor eIF2 subunit beta OS=Candida albicans (strain SC5314 / ATCC MYA-2876) OX=237561 GN=SUI3 PE=4 SV=1	14	222	0.715302	201	4	4	0		281	31.1	9.39	2503	17964.8	128.32	0	34.252	metabolic process		RNA binding	Pf01873	3643130	W5Q_05442; I503_05405	RNA transport	-471.388	-1.41879	9198.34	27.6853	-8.88077	-0.504662	13.1672	4.79105	0.00212139	0.704826	9198.34	27.6853	0.0249882	1	0.00380978	0.00189344	0.110957	0.322547	0.025082	0.00453578	783668	1662.47	2.16961e+07	1.5292e+07
CaO19.6324; VID27	A0A1D8PP94	Vid27p OS=Candida albicans (strain SC5314 / ATCC MYA-2876) OX=237561 GN=VID27 PE=4 SV=1	5	967	0.0228188	17	2	2	0		745	84.9	5.02	34	712.46	2.14	0	8.871	cell communication;response to stimulus		protein binding	Pf08553	3647894	W5Q_04603; I503_04578		3.13291	-31.8926	-3.39395	29.4396	1.6475	-4.99515	-1.76297	4.87969	3.13291	0.0313552	0.294642	29.4396	0.0252559	0.0466048	0.0129398	0.0480245	0.0208046	0.116399	0.0114062	0.117172	43562.8	136478	1.28247e+06	40212.2
RBT7	A0A1D8PLR0	Rbt7p OS=Candida albicans (strain SC5314 / ATCC MYA-2876) OX=237561 GN=RBT7 PE=3 SV=1	8	1056	0.00923077	3	1	1	0		325	36.8	5.08	31	207.7	2.43	0.002	5.455	metabolic process		catalytic activity;RNA binding	Pf00445	3637925			3.23928	1.66414	-1.65938	1.17304	1.69567	0.734779	-0.730644	0.23025	3.23928	1.66414	0.602635	1.17304	0.0254527	1	0.831224	1	0.0215797	0.505362	0.303664	0.774617	121617	393951	142661	237409
AAT22	A0A1D8PL85	Aspartate aminotransferase OS=Candida albicans (strain SC5314 / ATCC MYA-2876) OX=237561 GN=AAT22 PE=4 SV=1	20	736	0.0806846	33	5	5	0		409	46.8	6.15	131	2375.05	18.22	0	18.459	metabolic process		catalytic activity	Pf00155	3635651	W5Q_03422; I503_03421	Tyrosine metabolism; Phenylalanine, tyrosine and tryptophan biosynthesis; Cysteine and methionine metabolism; Phenylalanine metabolism; Alanine, aspartate and glutamate metabolism; Carbon metabolism; Biosynthesis of amino acids; Metabolic pathways; Biosynthesis of secondary metabolites; Biosynthesis of antibiotics; Arginine biosynthesis; Arginine and proline metabolism; 2-Oxocarboxylic acid metab…	-9.70668	-64.8495	-5.40737	1.23552	-3.27898	-6.01902	-2.43493	0.305118	0.103022	0.0154203	0.184933	1.23552	0.0256255	0.00676502	0.176778	1	0.0420128	0.0203594	0.215221	0.622759	2.19879e+06	226523	2.71665e+06	41891.5
BRE5; CAALFM_C604290WA	A0A1D8PQC8	Uncharacterized protein OS=Candida albicans (strain SC5314 / ATCC MYA-2876) OX=237561 GN=orf19.1086 PE=4 SV=1	10	698	0.096463	60	5	5	0		622	67	9.41	239	3356.46	8.88	0	15.654	transport		RNA binding	Pf02136	3646280		Mitophagy - yeast	-4.7722	-1.9928	7.89651	3.29745	-2.25466	-0.994794	2.98121	1.72135	0.209547	0.501807	7.89651	3.29745	0.0258078	0.724125	0.00450594	0.256278	0.0290939	0.360178	0.00671659	0.220572	2.09543e+06	439092	6.9096e+06	3.46729e+06
OPS4; OP4	A0A1D8PFJ9	Op4p OS=Candida albicans (strain SC5314 / ATCC MYA-2876) OX=237561 GN=OP4 PE=4 SV=1	3	549	0.168317	68	1	1	0		404	41.5	5.26	611	6544.33	66.13	0	9.102		extracellular			3636125			-5.87746	-1.00478	5.54357	-1.05519	-2.55519	-0.0068733	2.47081	-0.0775049	0.170142	0.995247	5.54357	0.947695	0.0261383	1	0.0103039	1	0.0333942	0.979199	0.0127295	0.84368	3.68481e+06	626939	3.49208e+06	3.47548e+06
PTC5	Q5A388	Type 2C protein phosphatase OS=Candida albicans (strain SC5314 / ATCC MYA-2876) OX=237561 GN=PTC5 PE=3 SV=1	2	830	0.05	29	1	1	0		580	64.9	9.03	146	1708.85	2.87	0.005	3.877	metabolic process;response to stimulus	membrane;mitochondrion	catalytic activity;metal ion binding	Pf00481	3642072	W5Q_06274; I503_06221		-7.78992	1.01758	24.2551	3.05986	-2.96161	0.0251414	4.60022	1.61347	0.128371	1.01758	24.2551	3.05986	0.0265745	1	0.0026577	0.350811	0.0393516	0.976703	0.00611299	0.283011	347112	44559.1	1.06211e+06	1.08078e+06
RPN13; CAALFM_C104230WA	A0A1D8PDB0	Proteasome regulatory particle lid subunit OS=Candida albicans (strain SC5314 / ATCC MYA-2876) OX=237561 GN=orf19.1058 PE=4 SV=1	63	96	1.66065	460	12	12	0		277	31.4	4.83	3001	33741.7	209.38	0	72.57		cytoplasm;nucleus;proteasome		Pf04683	3644722	W5Q_00412; I503_00415		-9.71229	-2.03445	31.2383	6.54355	-3.27981	-1.02464	4.96524	2.71007	0.102962	0.491532	31.2383	6.54355	0.0265963	0.280405	0.000697526	0.0277633	0.0436155	0.143657	0.00173169	0.0376203	2.19582e+07	2.26086e+06	1.43684e+08	7.06254e+07
LYS9	A0A1D8PKJ4	Saccharopine dehydrogenase (NADP+, L-glutamate-forming) OS=Candida albicans (strain SC5314 / ATCC MYA-2876) OX=237561 GN=LYS9 PE=4 SV=1	11	420	0.283784	126	4	4	0		444	49.2	5.59	701	8185.34	36.14	0	21.358	metabolic process		catalytic activity	Pf01488, Pf03435, Pf03446, Pf13460	3642279	W5Q_03170; I503_03170	Lysine biosynthesis; Metabolic pathways; Lysine degradation; Biosynthesis of amino acids; Biosynthesis of secondary metabolites; Biosynthesis of antibiotics	-5.8439	1.57037	28.8696	3.14583	-2.54693	0.651106	4.85148	1.65344	0.171119	1.57037	28.8696	3.14583	0.0272899	1	0.0159723	0.0390169	0.0347528	0.347761	0.0387446	0.0322561	2.53695e+06	434120	7.98084e+06	1.25329e+07
MRP8	Q5A646	Mrp8p OS=Candida albicans (strain SC5314 / ATCC MYA-2876) OX=237561 GN=MRP8 PE=4 SV=1	10	576	0.156098	32	2	2	0		205	23.4	4.97	157	1619.48	2.3	0	8.212				Pf07957	3641178	W5Q_03746; I503_03740		-3.14909	-2.22372	9.49677	6.70611	-1.65494	-1.15298	3.24744	2.74548	0.317552	0.449697	9.49677	6.70611	0.0277215	0.137068	0.00307554	0.0141946	0.0229387	0.0790178	0.00499381	0.0194855	839073	266449	5.62692e+06	2.53041e+06
SAP2	P0DJ06	Candidapepsin-2 OS=Candida albicans (strain SC5314 / ATCC MYA-2876) OX=237561 GN=SAP2 PE=1 SV=1	52	207	0.781407	311	13	12	1		398	42.3	4.7	1965	19387.5	99.66	0	75.722	metabolic process;regulation of biological process;response to stimulus	extracellular	catalytic activity	Pf00026	3647354	W5Q_06232		58.7294	9.38169	-5.48116	1.14209	5.87601	3.22985	-2.45448	0.191682	58.7294	9.38169	0.182443	1.14209	0.0277688	0.00381639	0.103503	1	0.081585	0.00616319	0.127024	0.886718	1.46509e+06	8.60437e+07	1.67327e+06	1.56981e+07
ARC18	Q59WT0	Actin-related protein 2/3 complex subunit 3 OS=Candida albicans (strain SC5314 / ATCC MYA-2876) OX=237561 GN=ARC18 PE=3 SV=1	8	559	0.164835	30	1	1	0		182	21.2	8.56	73	1025.56	0	0.007	3.427	cell organization and biogenesis;regulation of biological process;response to stimulus	cytoplasm;cytoskeleton	protein binding	Pf04062	3644056	W5Q_04704; I503_04679	Endocytosis	-27.8196	1.7809	251.78	5.08194	-4.79803	0.83261	7.97602	2.34538	0.0359459	1.7809	251.78	5.08194	0.0282175	0.749124	0.00447487	0.158065	0.0676943	0.311864	0.0178458	0.185361	327030	11755.4	1.66195e+06	2959767
CRZ1	Q5A4H5	Transcriptional regulator CRZ1 OS=Candida albicans (strain SC5314 / ATCC MYA-2876) OX=237561 GN=CRZ1 PE=1 SV=1	4	1060	0.00820793	6	2	2	0		731	81	5.81	70	324.47	0	0	6.837	cell communication;cell division;metabolic process;regulation of biological process;reproduction;response to stimulus	cytoplasm;nucleus	DNA binding;metal ion binding	Pf00096, Pf13465, Pf13894	3641722	W5Q_03086; I503_03080		-8.5087	-59.8272	6.23792	43.8607	-3.08894	-5.90273	2.64107	5.45486	0.117527	0.0167148	6.23792	43.8607	0.0283877	0.128757	0.305067	0.140292	0.043844	0.38001	0.402851	0.382636	21404.2	2515.57	938803	15691.9
DOR14; GND1	A0A1D8PFS4	6-phosphogluconate dehydrogenase, decarboxylating OS=Candida albicans (strain SC5314 / ATCC MYA-2876) OX=237561 GN=GND1 PE=3 SV=1	65	60	2.70303	1338	28	28	0		495	54.3	6.09	8948	95548.4	576.2	0	223.979	metabolic process	cytosol	catalytic activity	Pf00393, Pf03446	3636131	W5Q_01339; I503_01371		-5.75342	-2.33153	4.23709	1.71705	-2.52442	-1.22128	2.08308	0.779934	0.17381	0.428902	4.23709	1.71705	0.028527	0.327478	0.0264439	0.888178	0.0360071	0.199971	0.0275423	0.34636	1.15347e+08	2.00484e+07	1.98057e+08	8.49471e+07
PRE3	A0A1D8PK85	Proteasome core particle subunit beta 1 OS=Candida albicans (strain SC5314 / ATCC MYA-2876) OX=237561 GN=PRE3 PE=4 SV=1	9	941	0.0280374	6	2	2	0		214	23.3	6.89	52	314.45	0	0.002	5.536	metabolic process	nucleus;proteasome	catalytic activity	Pf00227	3643660	W5Q_03064; I503_03058	Proteasome	-19.6091	-25.7688	10.4122	13.6829	-4.29345	-4.68755	3.3802	3.7743	0.0509968	0.0388066	10.4122	13.6829	0.028558	0.166017	0.221945	0.214371	0.0613062	0.389108	0.37511	0.40455	32599.5	1662.47	446056	17309.9
EFB1	A0A1D8PM35	Translation elongation factor 1 subunit beta OS=Candida albicans (strain SC5314 / ATCC MYA-2876) OX=237561 GN=EFB1 PE=3 SV=1	88	20	5.38498	1147	14	14	0	Acetyl [N-Term]	213	23.5	4.4	7928	100696	698.35	0	242.953	metabolic process	cell surface;ribosome	RNA binding	Pf00736, Pf10587	3641125	W5Q_03751; I503_03745		-4.23803	-1.9491	15.1891	6.98558	-2.08339	-0.962805	3.92497	2.80438	0.235959	0.513058	15.1891	6.98558	0.0286038	0.318167	0.00730862	0.0198009	0.0297965	0.153166	0.014343	0.0277646	1.2225e+08	2.8846e+07	8.5399e+08	4.38146e+08
CaO19.4873; CAALFM_C110060CA	A0A1D8PEU0	Uncharacterized protein OS=Candida albicans (strain SC5314 / ATCC MYA-2876) OX=237561 GN=orf19.4873 PE=4 SV=1	8	520	0.188235	32	1	1	0		170	19.3	9.29	45	1459.47	1.63	0.01	3.28					3634812			-222.667	2.41966	1955.94	3.63032	-7.79874	1.27481	10.9336	1.86009	0.00449101	2.41966	1955.94	3.63032	0.028704	0.377747	0.00793665	0.336636	0.111928	0.240777	0.0433883	0.313088	370177	1662.47	1.34386e+06	3.25169e+06
CKS1	Q59LQ4	Cyclin-dependent kinases regulatory subunit OS=Candida albicans (strain SC5314 / ATCC MYA-2876) OX=237561 GN=CKS1 PE=3 SV=1	38	210	0.764706	78	2	2	0		102	12.1	6.8	88	3213.74	0	0	14.053	cell division;metabolic process;regulation of biological process		catalytic activity;enzyme regulator activity	Pf01111	3647732	W5Q_04426; I503_04423	Cell cycle - yeast	-43.0022	1.46127	80.3479	1.27866	-5.42634	0.547223	6.32819	0.354628	0.0232546	1.46127	80.3479	1.27866	0.0288132	1	0.0178591	1	0.0781751	0.528063	0.0565078	0.689579	3.65283e+06	84945.4	4.67072e+06	6.82518e+06
VMA7	A0A1D8PH17	V-type proton ATPase subunit F OS=Candida albicans (strain SC5314 / ATCC MYA-2876) OX=237561 GN=VMA7 PE=3 SV=1	91	12	8.60169	1015	13	13	0		118	13.1	5.12	10099	102062	778.76	0	162.022	cell communication;cellular homeostasis;regulation of biological process;response to stimulus;transport		catalytic activity;transporter activity	Pf01990	3637332	W5Q_01846; I503_01862	Oxidative phosphorylation; Metabolic pathways; Phagosome	-17.2161	-1.77008	71.1677	7.31712	-4.10569	-0.823813	6.15315	2.87128	0.0580851	0.564947	71.1677	7.31712	0.0289254	0.995189	0.00426771	0.0920317	0.0593794	0.409925	0.0131299	0.132124	9.31244e+07	5.40914e+06	6.81403e+08	3.84956e+08
TAL1	Q5A017	Transaldolase OS=Candida albicans (strain SC5314 / ATCC MYA-2876) OX=237561 GN=TAL1 PE=3 SV=1	51	100	1.63777	529	17	17	0	Acetyl [N-Term]	323	35.7	5	4279	36847.2	225.25	0	79.306	metabolic process	cell surface;cytoplasm	catalytic activity	Pf00923	3643225	W5Q_05803; I503_05785	Carbon metabolism; Biosynthesis of secondary metabolites; Metabolic pathways; Biosynthesis of antibiotics; Pentose phosphate pathway; Biosynthesis of amino acids	-2.10052	-2.33782	2.27183	2.52848	-1.07075	-1.22516	1.18386	1.33827	0.476072	0.427749	2.27183	2.52848	0.0290038	0.558483	0.23023	0.46044	0.0155279	0.342117	0.13628	0.308097	2.78396e+07	1.32536e+07	7.03919e+07	3.011e+07
ADE13	A0A1D8PT56	Adenylosuccinate lyase OS=Candida albicans (strain SC5314 / ATCC MYA-2876) OX=237561 GN=ADE13 PE=1 SV=1	12	550	0.16805	81	4	4	0		482	54.4	6.32	433	5359.47	28.43	0	17.506	metabolic process		catalytic activity	Pf00206, Pf10397	3644863	W5Q_06076; I503_06034	Alanine, aspartate and glutamate metabolism; Biosynthesis of antibiotics; Metabolic pathways; Purine metabolism; Biosynthesis of secondary metabolites	-17.2324	-1.2934	31.4242	2.35859	-4.10705	-0.371168	4.9738	1.23792	0.0580304	0.773157	31.4242	2.35859	0.0290301	1	0.0701228	0.686781	0.0596141	0.784886	0.174388	0.425091	1.67957e+06	97465.8	3.9614e+06	3.06278e+06
ERV1	A0A1D8PSD6	Sulfhydryl oxidase OS=Candida albicans (strain SC5314 / ATCC MYA-2876) OX=237561 GN=ERV1 PE=4 SV=1	19	540	0.175824	32	2	2	0		182	21	7.96	54	1372.7	2.82	0	6.775	metabolic process		catalytic activity	Pf04777	30515385	I503_05713		-232.52	1.13475	2888.75	10.9483	-7.86121	0.182379	11.4962	3.45264	0.00430071	1.13475	2888.75	10.9483	0.0295271	1	5.70826e-05	0.0400002	0.11606	0.739739	0.000328117	0.0690532	386557	1662.47	4.23215e+06	4.80245e+06
APT1	Q5ALX8	Adenine phosphoribosyltransferase OS=Candida albicans (strain SC5314 / ATCC MYA-2876) OX=237561 GN=APT1 PE=3 SV=1	39	193	0.824468	155	5	5	0		188	20.9	5.31	1360	13748.3	102.87	0	31.2	metabolic process	cytoplasm;nucleus	catalytic activity;metal ion binding	Pf00156	3635842	W5Q_01588; I503_01582	Metabolic pathways; Purine metabolism	-15.4768	-1.0457	105.154	7.10482	-3.95203	-0.0644729	6.71636	2.8288	0.064613	0.956295	105.154	7.10482	0.0299958	1	9.16423e-06	0.0326554	0.0592723	0.89129	3.07751e-05	0.0461878	1.55591e+06	100532	1.10544e+07	1.05713e+07
CaO19.4639; CAALFM_C401460CA	A0A1D8PLE6	Uncharacterized protein OS=Candida albicans (strain SC5314 / ATCC MYA-2876) OX=237561 GN=orf19.4639 PE=4 SV=1	13	415	0.290179	65	2	2	0		224	25.2	6.13	478	4803.58	17.46	0	16.248				Pf13462	3635622	I503_03449		-183.402	-1.47653	1546.96	12.4542	-7.51886	-0.562208	10.5952	3.63856	0.00545251	0.677265	1546.96	12.4542	0.0301207	1	0.0175402	0.00608333	0.113237	0.430322	0.092921	0.0110673	304900	1662.47	3.7973e+06	2.57178e+06
CaO19.6862; CAALFM_C405230CA	Q59RA0	Pre-rRNA-processing protein RIX1 OS=Candida albicans (strain SC5314 / ATCC MYA-2876) OX=237561 GN=RIX1 PE=3 SV=2	2	1097	0.00390117	3	1	1	0		769	87.6	5.07	67	291.29	1.93	0.002	5.507	metabolic process;response to stimulus	nucleus		Pf08167	3646156			-21.9737	-40.1985	19.7069	36.0517	-4.4577	-5.32907	4.30063	5.17199	0.045509	0.0248766	19.7069	36.0517	0.0301723	0.144169	0.17416	0.148998	0.0672496	0.384142	0.374499	0.385307	36530.5	1662.47	1.31699e+06	32762.1
SDS23; SDS24	Q5A744	Protein SDS23 OS=Candida albicans (strain SC5314 / ATCC MYA-2876) OX=237561 GN=SDS24 PE=2 SV=2	17	746	0.0764331	48	6	6	0		628	67.5	8.44	178	2641.73	8.36	0	33.226	cell communication;regulation of biological process;response to stimulus	cytoplasm;nucleus		Pf00571	3640756			-198.773	-1.62876	464.617	3.80711	-7.63498	-0.703776	8.8599	1.92869	0.00503086	0.613963	464.617	3.80711	0.0306804	1	0.00377044	0.351102	0.117122	0.602617	0.0167028	0.338584	1.32676e+06	6674.73	5.05111e+06	3.10119e+06
CaO19.14040; CaO19.6748; CAALFM_C307420WA	Q5ADU3	Eukaryotic translation initiation factor 3 subunit H OS=Candida albicans (strain SC5314 / ATCC MYA-2876) OX=237561 GN=orf19.6748 PE=3 SV=1	31	581	0.152439	50	4	4	0		328	37.4	5.25	228	2564.3	2.97	0	23.247	cell organization and biogenesis;metabolic process	cytoplasm	protein binding;RNA binding		3638485	W5Q_03251; I503_03252	RNA transport	-12.4763	-2.88148	18.2084	4.20534	-3.64112	-1.52681	4.18653	2.07222	0.080152	0.347044	18.2084	4.20534	0.0309587	0.109253	0.00385307	0.0554533	0.0563621	0.0834045	0.0080655	0.0574558	1.17565e+06	94231.1	4.94403e+06	1.71579e+06
NOP58; NOP5	Q59S06	Nucleolar protein 58 OS=Candida albicans (strain SC5314 / ATCC MYA-2876) OX=237561 GN=NOP58 PE=3 SV=2	3	782	0.0639535	33	1	1	0	Acetyl [N-Term]	516	57.1	8.31	848	5808.54		0	7.422	metabolic process	nucleus		Pf01798, Pf08060, Pf08156	3646084		Ribosome biogenesis in eukaryotes	-1165.4	-1.27179	2013.52	2.19732	-10.1866	-0.346859	10.9755	1.13574	0.000858071	0.786294	2013.52	2.19732	0.0310424	1	0.0045193	0.559341	0.158108	0.664961	0.0248008	0.317634	1.93745e+06	1662.47	4.2572e+06	3.34741e+06
SBA1	A0A1D8PQ94	Hsp90 cochaperone OS=Candida albicans (strain SC5314 / ATCC MYA-2876) OX=237561 GN=SBA1 PE=4 SV=1	41	139	1.17647	260	7	7	0	Acetyl [N-Term]	221	23.9	4.45	1482	17250.5	118.37	0	39.302	metabolic process			Pf04969	3640305	I503_04935		-10.2455	-4.42736	21.3994	9.24723	-3.35692	-2.14645	4.4195	3.20902	0.0976035	0.225868	21.3994	9.24723	0.0311483	0.151398	0.000906371	0.0750663	0.0522812	0.162483	0.00200285	0.120445	1.12583e+07	1.09885e+06	1.04109e+08	2.35148e+07
SPT5	Q5ALX3	Transcription elongation factor SPT5 OS=Candida albicans (strain SC5314 / ATCC MYA-2876) OX=237561 GN=SPT5 PE=3 SV=1	8	888	0.0366109	35	5	5	0		956	105.8	5.16	178	2129.11	8.61	0	16.489	cell communication;metabolic process;regulation of biological process;response to stimulus	nucleus		Pf00467, Pf03439, Pf11942	3635847	W5Q_01593; I503_01587		-16.0668	-1.57767	33.2653	3.26647	-4.00601	-0.657796	5.05595	1.70773	0.0622402	0.633846	33.2653	3.26647	0.0311525	1	0.0183806	0.295533	0.0623987	0.542687	0.0464657	0.252346	892843	55570.7	2.91645e+06	1.84858e+06
CaO19.5250; CAALFM_C112140WA; CaO19.12715	Q5A3M0	Uncharacterized protein OS=Candida albicans (strain SC5314 / ATCC MYA-2876) OX=237561 GN=orf19.5250 PE=4 SV=1	62	73	2.12346	344	7	7	0		162	17.9	5.35	2565	27879.1	227.22	0	57.292				Pf13380	3642050	W5Q_01174; I503_01184		-16.0278	-2.69718	32.1031	5.40235	-4.00251	-1.43145	5.00464	2.43359	0.0623916	0.370758	32.1031	5.40235	0.0311806	0.193778	0.0132284	0.0561976	0.0624002	0.138692	0.0331016	0.0683808	1.43019e+07	892317	7.72637e+07	2.86461e+07
ATX1	A0A1D8PTB8	Copper metallochaperone OS=Candida albicans (strain SC5314 / ATCC MYA-2876) OX=237561 GN=ATX1 PE=4 SV=1	19	562	0.162162	12	1	1	0		74	8.1	7.97	77	754.81	5.06	0	8.023	transport		metal ion binding	Pf00403	30515426	W5Q_06142; I503_06101		-2.91417	-6.17622	2.22974	4.72565	-1.54309	-2.62672	1.15687	2.24051	0.343151	0.161911	2.22974	4.72565	0.0312072	0.321929	0.727659	0.398688	0.0240777	0.422809	0.420905	0.446633	477426	163829	2.25615e+06	365296
RIP1	A0A1D8PJX3	Cytochrome b-c1 complex subunit Rieske, mitochondrial OS=Candida albicans (strain SC5314 / ATCC MYA-2876) OX=237561 GN=RIP1 PE=4 SV=1	44	104	1.62441	346	8	8	0		213	23.2	6.92	2885	31248.4	165.99	0	69.895	metabolic process;transport	membrane;mitochondrion	catalytic activity;transporter activity	Pf00355, Pf02921	3635204	W5Q_02952; I503_02946		-3.62378	-1.57897	22.4165	9.76745	-1.85749	-0.658986	4.48649	3.28798	0.275955	0.633323	22.4165	9.76745	0.0312487	1	0.000221267	0.061626	0.0290221	0.438717	0.000496355	0.101313	6.96723e+06	1.92264e+06	6.8052e+07	4.30989e+07
CaO19.8704; CaO19.1107; CAALFM_C503870CA	Q59N81	Uncharacterized protein OS=Candida albicans (strain SC5314 / ATCC MYA-2876) OX=237561 GN=orf19.1107 PE=4 SV=1	22	678	0.10396	21	4	4	0		202	21.4	9.67	160	1542.83	6.09	0	16.381				Pf12223	3647223	W5Q_04405; I503_04402		-14.7109	-29.1746	16.7884	33.2948	-3.87882	-4.86664	4.0694	5.05722	0.0679767	0.0342763	16.7884	33.2948	0.03126	0.158728	0.0286164	0.152	0.0606258	0.386237	0.0582257	0.384349	385196	26184.4	1.2825e+07	439595
CaO19.4964; CAALFM_C113380WA	Q5AL13	Pre-mRNA-splicing factor CWC26 OS=Candida albicans (strain SC5314 / ATCC MYA-2876) OX=237561 GN=CWC26 PE=3 SV=2	5	809	0.0569395	16	1	1	0		281	32.4	6.84	67	645.65	1.96	0.005	3.877	metabolic process	cytoplasm;nucleus;spliceosomal complex		Pf09736	3636217			-134.674	1.3931	338.197	1.80262	-7.07333	0.478297	8.40172	0.850094	0.00742533	1.3931	338.197	1.80262	0.0312971	1	0.000138513	1	0.110687	0.493438	0.000581873	0.478886	223892	1662.47	403591	562242
AGM1	Q5AKW4	Phosphoacetylglucosamine mutase OS=Candida albicans (strain SC5314 / ATCC MYA-2876) OX=237561 GN=AGM1 PE=3 SV=1	3	808	0.0569853	31	1	1	0		544	60.4	5.45	88	1325.7	0	0.002	4.873	metabolic process		catalytic activity;metal ion binding	Pf00408, Pf02878, Pf02879	3636138	W5Q_01329; I503_01361	Amino sugar and nucleotide sugar metabolism; Metabolic pathways; Biosynthesis of antibiotics	-6.42961	-1.37972	6.63463	1.42371	-2.68473	-0.464375	2.73002	0.509659	0.15553	0.724785	6.63463	1.42371	0.0314294	1	0.0647153	1	0.0421897	0.596553	0.0883369	0.537232	1419126	220717	2.02043e+06	1.46438e+06
CaO19.1533; CAALFM_C202170WA	A0A1D8PGJ8	Uncharacterized protein OS=Candida albicans (strain SC5314 / ATCC MYA-2876) OX=237561 GN=orf19.1533 PE=4 SV=1	6	700	0.0960699	44	2	2	0		458	53.1	8.62	291	2054.11	11.81	0	6.896		membrane		Pf14610	3635751			-2.34861	-2.51067	-2.4731	-2.31346	-1.23181	-1.32807	-1.30632	-1.21005	0.425783	0.3983	0.404351	0.432253	0.0314548	0.467027	0.034827	0.157742	0.0193732	0.310123	0.0227476	0.0954384	2.10381e+06	895767	909377	362205
GAD1	A0A1D8PF79	Glutamate decarboxylase OS=Candida albicans (strain SC5314 / ATCC MYA-2876) OX=237561 GN=GAD1 PE=3 SV=1	10	632	0.125	71	3	3	0		568	63.8	6.65	300	3777.2	15.24	0	11.479	metabolic process		catalytic activity	Pf00266, Pf00282	3645339		beta-Alanine metabolism; Taurine and hypotaurine metabolism; Biosynthesis of secondary metabolites; Metabolic pathways; Butanoate metabolism; Alanine, aspartate and glutamate metabolism	-109.357	-1.32812	71.599	-1.15001	-6.7729	-0.409389	6.16187	-0.201649	0.00914435	0.752942	71.599	0.869556	0.0316441	1	0.0106536	1	0.107161	0.658093	0.0328232	0.844944	1.76789e+06	16166.2	1.53728e+06	1.15748e+06
RPC53	A0A1D8PLP0	DNA-directed RNA polymerase III subunit OS=Candida albicans (strain SC5314 / ATCC MYA-2876) OX=237561 GN=RPC53 PE=4 SV=1	10	804	0.0575221	26	3	3	0		452	49.7	5.17	36	965.3	0	0	8.505	metabolic process		catalytic activity;DNA binding	Pf05132	3637898	I503_03579	RNA polymerase; Pyrimidine metabolism; Metabolic pathways; Purine metabolism	-7.30531	-3.37072	18.2363	8.41436	-2.86894	-1.75306	4.18874	3.07285	0.136887	0.296673	18.2363	8.41436	0.0317353	0.020788	0.000506915	0.0055608	0.0455234	0.0182213	0.00106167	0.00854376	556788	76216.9	4.68501e+06	1.38992e+06
CaO19.13537; CaO19.6118; CAALFM_CR07470WA	Q59RR5	Guanine nucleotide exchange factor OS=Candida albicans (strain SC5314 / ATCC MYA-2876) OX=237561 GN=CAALFM_CR07470WA PE=4 SV=1	15	1027	0.0133333	2	1	1	0		150	17.1	5.16	34	144.22		0.005	3.936	regulation of biological process;response to stimulus			Pf04421	3646048	W5Q_06196; I503_06154		-95.1799	-3.42451	41.3009	1.48598	-6.57258	-1.7759	5.3681	0.571415	0.0105064	0.292012	41.3009	1.48598	0.0318211	0.187249	0.0448739	1	0.104573	0.166268	0.120444	0.553111	158234	1662.47	235132	68661.5
CAALFM_C502190CA	A0A1D8PND4	Mitochondrial 37S ribosomal protein YMR31 OS=Candida albicans (strain SC5314 / ATCC MYA-2876) OX=237561 GN=orf19.4225.1 PE=4 SV=1	51	238	0.649485	63	2	2	0		97	10.6	9.13	141	2874.89	9.4	0	9.806		ribosome		Pf10937	30515303	W5Q_04247; I503_04244		-12.4279	-2.72205	47.3928	10.3803	-3.63551	-1.44469	5.5666	3.37578	0.0804641	0.36737	47.3928	10.3803	0.0318429	0.299437	0.000108253	0.0618081	0.0578826	0.216298	0.000301301	0.104325	1.22373e+06	98465.9	1.27027e+07	4.66658e+06
SMY2; CAALFM_C406680CA	A0A1D8PMM2	Uncharacterized protein OS=Candida albicans (strain SC5314 / ATCC MYA-2876) OX=237561 GN=orf19.3141 PE=4 SV=1	12	794	0.0618102	56	10	10	0		906	97.7	6.43	253	3283.29	11.65	0	34.44			protein binding	Pf02213	3642950	W5Q_03955		-2.77699	-4.90273	6.44439	11.3775	-1.47352	-2.29359	2.68804	3.50811	0.360102	0.203968	6.44439	11.3775	0.0318741	0.251552	0.0076416	0.132958	0.0234836	0.288478	0.0102705	0.233216	1.0875e+06	391609	1.23729e+07	2.52368e+06
MDH1; MDH1-1	Q5AMP4	Malate dehydrogenase OS=Candida albicans (strain SC5314 / ATCC MYA-2876) OX=237561 GN=MDH1-1 PE=3 SV=1	78	19	5.44578	1808	17	17	0		332	34.7	6.1	18314	144430	862.39	0	136.524	metabolic process		catalytic activity	Pf00056, Pf01073, Pf02866, Pf13460	3635636	W5Q_03490; I503_03482	Biosynthesis of antibiotics; Glyoxylate and dicarboxylate metabolism; Carbon metabolism; Pyruvate metabolism; Citrate cycle (TCA cycle); Metabolic pathways; Cysteine and methionine metabolism; Biosynthesis of secondary metabolites	-3.66737	1.47725	122.324	22.5789	-1.87475	0.562918	6.93457	4.4969	0.272675	1.47725	122.324	22.5789	0.0321782	1	0.0146199	0.0390857	0.030163	0.521257	0.0506914	0.0878823	5.10184e+07	1.39114e+07	1.15194e+09	1.7017e+09
RSC8; CAALFM_C114240WA	A0A1D8PFW3	Uncharacterized protein OS=Candida albicans (strain SC5314 / ATCC MYA-2876) OX=237561 GN=orf19.7234 PE=4 SV=1	14	815	0.0552585	31	6	6	0		561	64.3	5.17	155	1649.45	2.73	0	19.573		nucleus	DNA binding;protein binding	Pf04433	3643306	W5Q_01376; I503_01408		-17.9163	-3.88558	145.887	31.6391	-4.1632	-1.95813	7.18871	4.98364	0.0558151	0.257362	145.887	31.6391	0.0322421	0.318699	0.00392263	0.0820967	0.0671151	0.312026	0.0140993	0.20457	160491	8957.83	5.07779e+06	1.30683e+06
CaO19.6604; CAALFM_CR09580CA	A0A1D8PU09	Uncharacterized protein OS=Candida albicans (strain SC5314 / ATCC MYA-2876) OX=237561 GN=CAALFM_CR09580CA PE=4 SV=1	8	449	0.246411	103	3	3	0		418	47.8	5.72	354	6324.24	22.11	0	15.52					3647097	W5Q_06404		-8.07494	1.25833	158.166	15.566	-3.01345	0.331515	7.3053	3.96033	0.12384	1.25833	158.166	15.566	0.0323176	1	0.0182994	0.0388619	0.0486937	0.705929	0.0668413	0.076953	913441	113120	1.42187e+07	1.78918e+07
YCP4	A0A1D8PT03	Flavodoxin-like fold family protein OS=Candida albicans (strain SC5314 / ATCC MYA-2876) OX=237561 GN=YCP4 PE=4 SV=1	40	165	1.01736	293	5	5	0		288	29.8	7.96	1840	21736.1	108.67	0	56.49	metabolic process	membrane	catalytic activity;nucleotide binding	Pf00258, Pf03358	3648032	W5Q_06000; I503_05956		-7.59865	-1.99556	53.4324	14.0324	-2.92574	-0.996794	5.73964	3.81069	0.131602	0.501112	53.4324	14.0324	0.0323545	0.0345238	3.40238e-05	0.000923688	0.0473304	0.0172065	9.76422e-05	0.00175995	9.2211e+06	1.21352e+06	1.29395e+08	6.48412e+07
RBK1	A0A1D8PFI3	Ribokinase OS=Candida albicans (strain SC5314 / ATCC MYA-2876) OX=237561 GN=RBK1 PE=3 SV=1	15	797	0.0615385	24	4	4	0		390	41.8	5.45	104	1060.79	3.87	0	16.388	metabolic process	cytoplasm;nucleus	catalytic activity;metal ion binding;nucleotide binding	Pf00294	3646830		Pentose phosphate pathway	-22.1112	-31.5944	5.8016	8.28985	-4.4667	-4.9816	2.53645	3.05135	0.045226	0.0316512	5.8016	8.28985	0.0329721	0.154627	0.350526	0.279621	0.0736384	0.385145	0.444546	0.426611	344929	15599.8	2.85941e+06	90503.6
CaO19.3932; CAALFM_C504470CA; CaO19.11414	Q5AK88	Uncharacterized protein OS=Candida albicans (strain SC5314 / ATCC MYA-2876) OX=237561 GN=orf19.3932 PE=4 SV=1	48	81	1.93091	531	15	15	0	Acetyl [N-Term]	275	30.3	5.21	6366	49307.4	364.5	0	76.707				Pf14259	3636414			-3.83896	-2.23317	7.36999	4.28721	-1.94072	-1.15909	2.88166	2.10004	0.260487	0.447794	7.36999	4.28721	0.0329932	0.456742	0.00441443	0.13725	0.0320152	0.264703	0.00636045	0.144115	8.2201e+07	2.14123e+07	3.52413e+08	1.57809e+08
RPL25	A0A1D8PPS1	Ribosomal 60S subunit protein L25 OS=Candida albicans (strain SC5314 / ATCC MYA-2876) OX=237561 GN=RPL25 PE=3 SV=1	46	157	1.07042	152	6	6	0		142	15.8	10.15	994	9145	31	0	31.054	metabolic process	ribosome	structural molecule activity	Pf00276, Pf03939	30515338	W5Q_04776; I503_04759		-2.39457	-4.49197	1.01768	1.90907	-1.25977	-2.16735	0.0252892	0.932868	0.417611	0.222619	1.01768	1.90907	0.0331178	0.345488	1	1	0.0208604	0.374396	0.970163	0.572906	1.1859e+07	4.95244e+06	2.26396e+07	5.04002e+06
CSP37	Q5A9D4	Csp37p OS=Candida albicans (strain SC5314 / ATCC MYA-2876) OX=237561 GN=CSP37 PE=4 SV=1	42	310	0.451713	145	13	13	0		321	37	7.06	903	8244.74	12.78	0	42.502		cell surface;membrane			3640098	W5Q_05606; I503_05569		-4.82389	1.2928	24.0888	3.86268	-2.2702	0.370494	4.59029	1.9496	0.207301	1.2928	24.0888	3.86268	0.0332554	1	0.00209757	0.115639	0.0377482	0.525108	0.00481424	0.112725	1.18078e+07	2.44777e+06	4.56096e+07	5.89639e+07
NUP159	A0A1D8PKV6	FG-nucleoporin OS=Candida albicans (strain SC5314 / ATCC MYA-2876) OX=237561 GN=NUP159 PE=4 SV=1	3	1071	0.00705882	6	2	2	0		850	92.8	4.96	143	597.64	4.21	0	9.258			protein binding	Pf13634	3647458	W5Q_03286; I503_03287		-4.25854	-1076.9	1.35582	342.86	-2.09036	-10.0727	0.439163	8.42148	0.234822	0.000928589	1.35582	342.86	0.0332776	0.074195	1	0.0889455	0.0347811	0.373671	0.42833	0.374526	7079.69	1662.47	2.42734e+06	2254.01
LSC1	Q5A8X6	Succinate--CoA ligase [ADP-forming] subunit alpha, mitochondrial OS=Candida albicans (strain SC5314 / ATCC MYA-2876) OX=237561 GN=LSC1 PE=3 SV=1	52	161	1.06192	343	10	10	0		323	33.7	8.85	1229	22909.2	138.96	0	96.863	metabolic process	mitochondrion	catalytic activity;nucleotide binding	Pf00549, Pf02629, Pf13607	3640199	W5Q_00160; I503_00162	Citrate cycle (TCA cycle); Carbon metabolism; Biosynthesis of antibiotics; Biosynthesis of secondary metabolites; Propanoate metabolism; Metabolic pathways	-1.98015	-2.07742	4.05857	4.25794	-0.985609	-1.05479	2.02097	2.09015	0.505013	0.481367	4.05857	4.25794	0.0339059	0.834601	0.048896	0.254567	0.016709	0.440165	0.0494087	0.266042	1.18394e+07	5.97904e+06	5.04113e+07	2.42663e+07
POT1	A0A1D8PRL6	Acetyl-CoA C-acyltransferase OS=Candida albicans (strain SC5314 / ATCC MYA-2876) OX=237561 GN=POT1 PE=3 SV=1	3	930	0.0294118	12	1	1	0		408	42.9	6.1	45	569.68	0	0.005	3.742	metabolic process		catalytic activity	Pf00108, Pf02803	3639707	W5Q_05479; I503_05443	Biosynthesis of antibiotics; Biosynthesis of secondary metabolites; alpha-Linolenic acid metabolism; Fatty acid metabolism; Metabolic pathways; Fatty acid degradation; Biosynthesis of unsaturated fatty acids; Peroxisome; Valine, leucine and isoleucine degradation	-121.007	-2.50731	172.531	3.57489	-6.91895	-1.32614	7.43071	1.8379	0.00826397	0.398834	172.531	3.57489	0.0340878	0.0572725	0.0111073	0.0251882	0.117926	0.0379756	0.0412675	0.0231467	201171	1662.47	719164	286827
GRX3	Q5AF81	Monothiol glutaredoxin OS=Candida albicans (strain SC5314 / ATCC MYA-2876) OX=237561 GN=GRX3 PE=4 SV=1	29	189	0.837945	212	5	5	0		253	28.4	4.67	2440	17826.8	65.56	0	40.819	cellular homeostasis;metabolic process;regulation of biological process		catalytic activity	Pf00085, Pf00462, Pf13098, Pf13905	3637858	W5Q_03559; I503_03570; I503_03567		-4.06105	-2.85036	6.45406	4.52997	-2.02185	-1.51115	2.69021	2.1795	0.246242	0.350832	6.45406	4.52997	0.0343082	0.0581489	0.000139353	0.0248349	0.0346831	0.0439358	0.000187444	0.0270638	1.17073e+07	2.88283e+06	5.30336e+07	1.86059e+07
DAK2	A0A1D8PEI2	Dihydroxyacetone kinase OS=Candida albicans (strain SC5314 / ATCC MYA-2876) OX=237561 GN=DAK2 PE=4 SV=1	22	544	0.173109	103	7	7	0		595	64.9	5.44	346	5100.05	18.17	0	27.491	metabolic process		catalytic activity;nucleotide binding	Pf02733, Pf02734	3634895		Metabolic pathways; Glycerolipid metabolism; Methane metabolism; Fructose and mannose metabolism; Carbon metabolism	-4.02834	-2.23294	2.68525	1.48846	-2.01018	-1.15895	1.42506	0.573819	0.248242	0.447839	2.68525	1.48846	0.0345241	0.249396	0.0591695	1	0.0346999	0.144518	0.0421599	0.377942	4.24533e+06	1.05387e+06	6.31899e+06	2.82989e+06
ARC15	Q59RN2	Actin-related protein 2/3 complex subunit 5 OS=Candida albicans (strain SC5314 / ATCC MYA-2876) OX=237561 GN=ARC15 PE=3 SV=1	68	69	2.24051	354	8	8	0		158	17.7	4.88	2229	24934.5	168.4	0	53.256	cell organization and biogenesis;regulation of biological process;response to stimulus	cytoplasm;cytoskeleton		Pf04699	3646043	W5Q_06171; I503_06129	Endocytosis	-11.4952	-1.54311	125.094	16.7927	-3.52296	-0.625845	6.96687	4.06976	0.086993	0.64804	125.094	16.7927	0.0345356	1	0.00585059	0.0375351	0.0608338	0.46037	0.0203802	0.0763794	1.47681e+07	1.28472e+06	2.47996e+08	1.60711e+08
HSP90; CaJ7_0234	P46598	Heat shock protein 90 homolog OS=Candida albicans (strain SC5314 / ATCC MYA-2876) OX=237561 GN=HSP90 PE=1 SV=1	66	88	1.8232	1289	40	40	0		707	80.8	4.88	7586	90503.8	544.37	0	262.714	metabolic process;regulation of biological process;response to stimulus	cell surface;cytoplasm;membrane	catalytic activity;nucleotide binding;protein binding	Pf00183, Pf02518, Pf13589	3636951	W5Q_05246; I503_05205	Protein processing in endoplasmic reticulum	-3.09006	-2.26208	9.55884	6.99755	-1.62764	-1.17765	3.25684	2.80685	0.323618	0.442071	9.55884	6.99755	0.0354832	0.78429	0.091948	0.183565	0.0288769	0.46181	0.14973	0.25762	9.60374e+07	3.10794e+07	6.72027e+08	2.97083e+08
CaO19.4683; MLP1	A0A1D8PL86	Mlp1p OS=Candida albicans (strain SC5314 / ATCC MYA-2876) OX=237561 GN=MLP1 PE=4 SV=1	2	1000	0.0180131	33	3	3	0		1832	207.6	5.15	177	1607.01	1.82	0	10.427	transport			Pf01496, Pf01576, Pf02463, Pf04111, Pf05478, Pf05557, Pf05622, Pf07926, Pf12128, Pf13166, Pf13514	3635688		RNA transport	-3.75254	-2.82674	2.49176	1.87701	-1.90787	-1.49914	1.31717	0.908439	0.266486	0.353764	2.49176	1.87701	0.0355048	0.1427	0.0297447	0.507372	0.0338692	0.106964	0.0195894	0.230458	1.41664e+06	377514	2.65904e+06	940675
CaO19.4263; CAALFM_C502510CA	A0A1D8PNG2	Uncharacterized protein (Fragment) OS=Candida albicans (strain SC5314 / ATCC MYA-2876) OX=237561 GN=orf19.4263 PE=4 SV=1	12	521	0.188144	73	3	3	0		388	42.5	6.92	280	3932.61	7.05	0	12.927					3637767	W5Q_04278; I503_04274		-26.1294	-2.20554	123.411	10.417	-4.7076	-1.14113	6.94733	3.38086	0.038271	0.453403	123.411	10.417	0.0358313	0.0167325	0.00180142	0.000322414	0.0843397	0.00954702	0.00625752	0.000545018	597908	22882.6	6.22839e+06	2.82397e+06
CaO19.5671; CAALFM_C400420CA	A0A1D8PL12	Uncharacterized protein OS=Candida albicans (strain SC5314 / ATCC MYA-2876) OX=237561 GN=orf19.5671 PE=4 SV=1	18	513	0.197287	160	10	10	0		811	90.1	7.06	1679	13923.3	98.08	0	63.28				Pf10291	3645021	W5Q_03343		-8.4678	-1.79395	196.225	41.5714	-3.08199	-0.843143	7.61636	5.37752	0.118094	0.557428	196.225	41.5714	0.0358801	0.485502	0.0058871	0.0064248	0.0552909	0.204674	0.0224192	0.0172747	852361	100659	3.54338e+07	1.97518e+07
VTI1	A0A1D8PJW1	V-SNARE protein OS=Candida albicans (strain SC5314 / ATCC MYA-2876) OX=237561 GN=VTI1 PE=4 SV=1	26	780	0.0645161	14	5	5	0	Acetyl [N-Term]	217	24.8	5.52	123	717.68	2.25	0	14.557	cell organization and biogenesis;transport	Golgi;membrane	protein binding	Pf05008, Pf12352	3638352	I503_02836		-107.232	-24.1898	65.9001	14.866	-6.74459	-4.59633	6.04221	3.89394	0.00932557	0.0413397	65.9001	14.866	0.0359738	0.152064	0.0134759	0.185659	0.121314	0.349468	0.0407119	0.361474	178270	1662.47	2.65016e+06	109557
POB3	Q5ALL8	FACT complex subunit POB3 OS=Candida albicans (strain SC5314 / ATCC MYA-2876) OX=237561 GN=POB3 PE=3 SV=1	12	814	0.0557621	30	5	5	0		538	60.9	4.83	110	1375.34	3.74	0	14.582	cell communication;metabolic process;regulation of biological process;response to stimulus	chromosome;nucleus	DNA binding	Pf03531, Pf08512	3635827			4.28743	-4.45445	-1.45432	13.132	2.10011	-2.15525	-0.540348	3.71501	4.28743	0.224495	0.687605	13.132	0.0361873	0.394791	1	0.186889	0.0379987	0.425436	0.496397	0.347148	292620	1.25459e+06	3.84269e+06	862662
CaO19.1961; CAALFM_C501090CA	A0A1D8PN39	Uncharacterized protein OS=Candida albicans (strain SC5314 / ATCC MYA-2876) OX=237561 GN=orf19.1961 PE=4 SV=1	2	768	0.0679245	36	1	1	0		530	60.9	4.73	297	2048.96	1.96	0.003	4.22				Pf13621	3642625			-18.3017	-2.33993	38.0655	4.8668	-4.1939	-1.22646	5.25041	2.28297	0.0546398	0.427363	38.0655	4.8668	0.0365201	0.449086	0.000371204	0.138507	0.0765808	0.275394	0.000974486	0.158103	530193	28969.6	2.58034e+06	1.10274e+06
RRF1; CAALFM_CR03950WA	Q5A6S7	Uncharacterized protein OS=Candida albicans (strain SC5314 / ATCC MYA-2876) OX=237561 GN=CAALFM_CR03950WA PE=4 SV=1	5	903	0.0344828	9	1	1	0		261	29.6	9.63	121	749.74	5.51	0.003	4.396	metabolic process			Pf01765	3640960	W5Q_05826; I503_05808		-7.15115	-2.27547	18.2112	5.79474	-2.83818	-1.18616	4.18676	2.53474	0.139838	0.43947	18.2112	5.79474	0.0371486	0.658553	0.135777	0.125645	0.0527171	0.390576	0.284232	0.15924	176122	24628.5	1.02058e+06	448515
CaJ7_0018; SOD3	A0A1D8PQH5	Superoxide dismutase OS=Candida albicans (strain SC5314 / ATCC MYA-2876) OX=237561 GN=SOD3 PE=3 SV=1	73	39	3.66505	755	10	9	1		206	22.7	7.31	5590	57949.6	313.53	0	72.534	metabolic process;response to stimulus	cytosol	antioxidant activity;catalytic activity;metal ion binding	Pf00081, Pf02777	30515347	W5Q_05066; I503_05022		-3.11638	-1.85076	27.3748	16.2574	-1.63987	-0.888115	4.77478	4.02302	0.320885	0.54032	27.3748	16.2574	0.0371591	0.629617	0.00653582	0.026293	0.0304681	0.279586	0.0156035	0.0528886	4.58479e+07	1.47119e+07	7.45365e+08	4.02736e+08
SOL3	Q59PZ6	6-phosphogluconolactonase-like protein OS=Candida albicans (strain SC5314 / ATCC MYA-2876) OX=237561 GN=SOL3 PE=3 SV=1	69	45	3.30888	857	19	19	0		259	28.5	5.53	3463	55746.7	227.73	0	130.926	metabolic process		catalytic activity	Pf01182	3646625	W5Q_06118; I503_06077	Pentose phosphate pathway; Metabolic pathways; Biosynthesis of antibiotics; Biosynthesis of secondary metabolites; Carbon metabolism	-12.5938	-2.00573	86.5107	13.7779	-3.65465	-1.00413	6.43481	3.78429	0.0794039	0.498572	86.5107	13.7779	0.0373362	0.421208	0.00482873	0.0224823	0.0682254	0.211473	0.015536	0.0425398	6.06415e+07	4.81518e+06	8.35515e+08	4.16564e+08
CaO19.2241; PST1	A0A1D8PHR5	Pst1p OS=Candida albicans (strain SC5314 / ATCC MYA-2876) OX=237561 GN=PST1 PE=4 SV=1	43	122	1.41414	280	4	4	0		198	21.3	6.64	2661	27924	175.64	0	61.757	metabolic process	membrane	catalytic activity;nucleotide binding	Pf00258, Pf02525, Pf03358	3643520			-62.279	-1.05757	635.58	10.7928	-5.96067	-0.080748	9.31193	3.432	0.0160568	0.945567	635.58	10.7928	0.0376746	1	9.78944e-05	0.00636602	0.112283	0.813851	0.000455793	0.0109241	1.46456e+07	235160	1.58067e+08	1.49463e+08
CaO19.6160; CAALFM_C300850CA	A0A1D8PJ10	Uncharacterized protein OS=Candida albicans (strain SC5314 / ATCC MYA-2876) OX=237561 GN=orf19.6160 PE=4 SV=1	38	259	0.574755	469	25	25	0		816	89.6	5.63	3068	30320.7	152.12	0	154.811				Pf04111, Pf05262, Pf09731, Pf12757, Pf13514, Pf15070	3647748			-6.24293	-3.85227	12.1984	7.52717	-2.64222	-1.94571	3.60862	2.91211	0.160181	0.259587	12.1984	7.52717	0.0377694	0.411511	0.0175158	0.227555	0.0498976	0.40034	0.0316039	0.331332	1.96059e+07	3.1405e+06	1.47577e+08	3.83092e+07
ASF1	Q59MV1	Histone chaperone ASF1 OS=Candida albicans (strain SC5314 / ATCC MYA-2876) OX=237561 GN=ASF1 PE=3 SV=1	10	938	0.0283401	7	2	2	0	Acetyl [N-Term]	247	28	3.88	98	660.35	0	0	6.95	cell organization and biogenesis;metabolic process;regulation of biological process	nucleus	protein binding	Pf04729	3647348	W5Q_06238; I503_06193		-5.70258	-38.3174	4.28118	28.7666	-2.51162	-5.25993	2.09801	4.84632	0.175359	0.0260978	4.28118	28.7666	0.0378746	0.145616	0.393924	0.159592	0.0475632	0.382964	0.413227	0.386717	13281.7	2329.06	382068	9971.12
CAALFM_C104360CA	A0A1D8PD97	Uncharacterized protein OS=Candida albicans (strain SC5314 / ATCC MYA-2876) OX=237561 GN=orf19.5201.1 PE=4 SV=1	33	425	0.277108	23	3	3	0		83	9.6	9.48	229	1637.74	5.62	0	8.524	regulation of biological process	mitochondrion	enzyme regulator activity	Pf04568	30514985	W5Q_00426; I503_00429		-279.883	-9.61163	149.11	5.12066	-8.12868	-3.26478	7.22023	2.35633	0.00357292	0.104041	149.11	5.12066	0.0378834	0.244509	0.0361057	0.379346	0.153971	0.399134	0.130346	0.446932	2.8476e+06	10174.2	1.45816e+07	1.51708e+06
CaO19.7905; CaO19.273; CAALFM_C302820CA	A0A1D8PJM6	Uncharacterized protein OS=Candida albicans (strain SC5314 / ATCC MYA-2876) OX=237561 GN=NSG2 PE=4 SV=1	8	446	0.251497	84	2	2	0		334	36.7	6.7	693	7653.74	73.38	0	13.891		membrane		Pf07281	3638419			-56.2877	-1.83527	67.783	2.21007	-5.81475	-0.875991	6.08285	1.1441	0.0177659	0.54488	67.783	2.21007	0.0379625	0.826783	0.000278539	0.57007	0.110371	0.362127	0.000847154	0.326107	2.76415e+06	49107.6	6.10899e+06	3.32866e+06
CPR52; CAALFM_C305550CA	A0A1D8PKA6	Peptidyl-prolyl cis-trans isomerase OS=Candida albicans (strain SC5314 / ATCC MYA-2876) OX=237561 GN=orf19.6990 PE=3 SV=1	11	968	0.0228137	6	2	2	0		263	28.8	6.15	31	255.68	0	0.002	5.068	metabolic process	membrane	catalytic activity	Pf00160	3643659	W5Q_03063; I503_03057		-135.551	-3.29826	42.8916	1.04365	-7.08269	-1.72171	5.42262	0.0616418	0.00737732	0.30319	42.8916	1.04365	0.0387118	0.558064	0.0745792	1	0.137092	0.480411	0.202207	0.969081	225349	1662.47	235186	71306
PHZ1; CAALFM_C603320WA	A0A1D8PQ54	Uncharacterized protein OS=Candida albicans (strain SC5314 / ATCC MYA-2876) OX=237561 GN=orf19.5620 PE=4 SV=1	33	297	0.482201	149	8	8	0		309	33.6	5.66	1166	11399.4	89.84	0	40.04	metabolic process		catalytic activity	Pf02567, Pf05544	3639198			-3.05436	-1.89471	12.1772	7.55384	-1.61087	-0.921974	3.60611	2.91721	0.327401	0.527787	12.1772	7.55384	0.038767	0.163393	0.0019853	0.00623012	0.0312243	0.0753219	0.0035796	0.00908729	4.13294e+06	1.35313e+06	3.12196e+07	1.64773e+07
CaO19.3053; CAALFM_C103510CA	A0A1D8PD11	Uncharacterized protein OS=Candida albicans (strain SC5314 / ATCC MYA-2876) OX=237561 GN=orf19.3053 PE=4 SV=1	54	49	3.1768	575	8	8	0		181	20.3	5.26	3656	45859.3	307.34	0	68.961				Pf11578	3636916			-4.69721	-1.01741	23.4964	5.08929	-2.23181	-0.0248991	4.55437	2.34746	0.212892	0.982889	23.4964	5.08929	0.0389174	1	0.0104762	0.000953456	0.043428	0.95373	0.0238563	0.0011191	6.50219e+07	1.38427e+07	3.30915e+08	3.25253e+08
RPN1	A0A1D8PFL7	26S proteasome regulatory subunit RPN1 OS=Candida albicans (strain SC5314 / ATCC MYA-2876) OX=237561 GN=RPN1 PE=3 SV=1	14	798	0.060423	60	7	7	0		993	109.8	4.73	227	3226.78	21.3	0	32.638	regulation of biological process	proteasome	enzyme regulator activity		3636147		Proteasome	-35.1429	-2.79609	95.6292	7.60858	-5.13516	-1.48341	6.57938	2.92763	0.0284552	0.357643	95.6292	7.60858	0.0390135	0.497481	0.00130105	0.166117	0.10017	0.368984	0.00428003	0.243164	1.12094e+06	31896.7	8.52878e+06	3.05025e+06
DJP2; CAALFM_C405810WA	Q5A441	Uncharacterized protein OS=Candida albicans (strain SC5314 / ATCC MYA-2876) OX=237561 GN=orf19.1267 PE=4 SV=1	13	770	0.0672451	31	3	3	0		461	52.6	5.4	166	2176.57	0	0	13.46				Pf00226, Pf14308	3641786			-8.85535	-2.35498	9.18124	2.44164	-3.14655	-1.23571	3.19869	1.28785	0.112926	0.424633	9.18124	2.44164	0.0393938	0.573368	0.035469	0.532592	0.0619772	0.354259	0.0567271	0.342949	1.7214e+06	194391	4.20304e+06	1.78475e+06
FBP1	A0A1D8PKW2	Fructose 1,6-bisphosphate 1-phosphatase OS=Candida albicans (strain SC5314 / ATCC MYA-2876) OX=237561 GN=FBP1 PE=3 SV=1	25	532	0.181269	60	6	6	0	Acetyl [N-Term]	331	35.9	6.24	381	4002.61	15.93	0	20.85	metabolic process		catalytic activity	Pf00316, Pf10664	3647464	W5Q_03291; I503_03292	Biosynthesis of secondary metabolites; Biosynthesis of antibiotics; Methane metabolism; Carbon metabolism; Pentose phosphate pathway; Metabolic pathways; Fructose and mannose metabolism; Glycolysis / Gluconeogenesis	-27.8264	-3.33389	30.3272	3.63351	-4.79838	-1.73721	4.92254	1.86137	0.0359371	0.29995	30.3272	3.63351	0.0394453	0.0143916	0.00990314	0.0186776	0.0946369	0.0125006	0.0243743	0.0173829	2.53306e+06	91030.9	9.20393e+06	2.76071e+06
TTR11; TTR1	Q5ABB1	Dithiol glutaredoxin OS=Candida albicans (strain SC5314 / ATCC MYA-2876) OX=237561 GN=TTR1 PE=4 SV=1	55	118	1.42857	170	4	4	0		119	13.1	7.94	1720	13628.2	83.55	0	19.862	cellular homeostasis;metabolic process;regulation of biological process;response to stimulus		catalytic activity	Pf00462	3639313	W5Q_00043; I503_00043		-3.06424	-3.10202	8.56194	8.66749	-1.61553	-1.63321	3.09794	3.11561	0.326345	0.322371	8.56194	8.66749	0.0396339	0.578716	0.104379	0.225581	0.0320149	0.472581	0.16168	0.351411	1.29562e+07	4.22819e+06	1.12298e+08	3.62015e+07
CaO19.2296; CAALFM_C111200WA	A0A1D8PF42	Uncharacterized protein OS=Candida albicans (strain SC5314 / ATCC MYA-2876) OX=237561 GN=orf19.2296 PE=4 SV=1	33	473	0.225402	575	58	58	0		2551	264.4	6.38	4794	43516.2	260.9	0	259.548					3644396			-3.09113	-4.14917	14.3267	19.2305	-1.62813	-2.05282	3.84063	4.26532	0.323506	0.241012	14.3267	19.2305	0.0399025	0.374309	0.00526791	0.135458	0.0324833	0.384195	0.0101161	0.288887	1.30983e+07	4.23738e+06	2.51886e+08	6.07075e+07
CaO19.3887; CAALFM_CR06330CA; CaO19.11368	Q59V65	Uncharacterized protein OS=Candida albicans (strain SC5314 / ATCC MYA-2876) OX=237561 GN=CAALFM_CR06330CA PE=4 SV=1	32	234	0.68306	125	5	5	0		183	21.6	5.07	1514	8547.98	55.67	0	22.518				Pf08987	3644846	W5Q_06089; I503_06047		-11.1667	-5.51652	20.6264	10.1898	-3.48113	-2.46376	4.36642	3.34905	0.0895523	0.181274	20.6264	10.1898	0.039961	0.208528	0.000959581	0.131122	0.0695547	0.256881	0.00209497	0.219567	1.40447e+06	125774	1.43112e+07	2.59425e+06
AMS1	Q5AF38	Alpha-mannosidase OS=Candida albicans (strain SC5314 / ATCC MYA-2876) OX=237561 GN=AMS1 PE=4 SV=1	21	527	0.18355	212	16	16	0		1155	131.5	6.04	1208	15368.3	94.24	0	77.613	metabolic process		catalytic activity;metal ion binding	Pf01074, Pf07748, Pf09261	3637882	W5Q_03535; I503_03527	Other glycan degradation	-12.7772	-1.46449	62.8845	7.20767	-3.6755	-0.550403	5.97463	2.84953	0.0782642	0.682829	62.8845	7.20767	0.0399985	1	0.000193007	0.158282	0.0735074	0.626746	0.000576574	0.225515	1.56036e+07	1.22121e+06	1.12466e+08	7.67949e+07
CAP001; SRV2	Q5A6P9	Adenylyl cyclase-associated protein OS=Candida albicans (strain SC5314 / ATCC MYA-2876) OX=237561 GN=SRV2 PE=3 SV=1	40	169	0.985321	537	18	18	0	Acetyl [N-Term]	545	59.6	5.29	5192	45934.8	339.4	0	105.155	cell organization and biogenesis;regulation of biological process;response to stimulus		protein binding	Pf01213, Pf08603	3640938	W5Q_05850; I503_05832		-16.2961	-2.05576	47.1265	5.94505	-4.02645	-1.03967	5.55847	2.57169	0.0613645	0.486437	47.1265	5.94505	0.040273	0.00953658	3.25118e-05	0.00127795	0.0810786	0.00495747	9.0358e-05	0.00164324	2.98433e+07	1.83132e+06	1.7742e+08	8.63036e+07
NAS6; CAALFM_C304920CA	Q5ANE2	Uncharacterized protein OS=Candida albicans (strain SC5314 / ATCC MYA-2876) OX=237561 GN=orf19.5961 PE=4 SV=1	66	91	1.7992	448	12	12	0		249	27.3	5.96	3491	38043.7	242.08	0	95.89			protein binding	Pf00023, Pf12796, Pf13606, Pf13637, Pf13857	3635268	W5Q_03001; I503_02995		-29.1677	-2.05484	334.499	23.5652	-4.8663	-1.03902	8.38586	4.55859	0.0342846	0.486656	334.499	23.5652	0.0406364	1	0.0136758	0.113072	0.0988744	0.530644	0.0573417	0.257724	1.73605e+07	595198	4.09104e+08	1.99093e+08
ATP16	A0A1D8PUD2	F1F0 ATP synthase subunit delta OS=Candida albicans (strain SC5314 / ATCC MYA-2876) OX=237561 GN=ATP16 PE=3 SV=1	80	14	7.79503	1255	10	10	0		161	17.6	5.31	14407	97930.7	719.56	0	83.241	metabolic process;transport		catalytic activity;transporter activity	Pf02823	3638963	W5Q_06523; I503_06469	Metabolic pathways; Oxidative phosphorylation	-8.13251	-2.78012	128.218	43.8317	-3.0237	-1.47514	7.00246	5.4539	0.122963	0.359697	128.218	43.8317	0.0407104	0.263941	4.39207e-05	0.0278979	0.0615481	0.194676	0.000153776	0.0760762	1.28203e+08	1.57643e+07	5.61938e+09	2.02128e+09
CaO19.2794; CAALFM_C107510WA	A0A1D8PE30	Pyridoxal phosphate homeostasis protein OS=Candida albicans (strain SC5314 / ATCC MYA-2876) OX=237561 GN=orf19.2794 PE=3 SV=1	55	150	1.10469	306	12	12	0		277	31.3	8.81	1942	17396.2	32.18	0	66.802				Pf01168	3646664	W5Q_00723; I503_00727		-31.3292	-2.4946	208.79	16.625	-4.96943	-1.31881	7.70591	4.05528	0.0319191	0.400866	208.79	16.625	0.0407835	0.30052	0.00812359	0.0315402	0.101335	0.198164	0.0312998	0.0639521	7.10571e+06	226808	1.18132e+08	4.73552e+07
CaO19.7350; RCT1	A0A1D8PKD1	Rct1p OS=Candida albicans (strain SC5314 / ATCC MYA-2876) OX=237561 GN=RCT1 PE=4 SV=1	55	72	2.19372	419	9	9	0	Acetyl [N-Term]	191	20.5	6.44	4269	32252.8	189.27	0	61.226		membrane			3641727	W5Q_03079; I503_03073		-7.30232	1.37206	20.8767	2.08366	-2.86835	0.456348	4.38382	1.05912	0.136943	1.37206	20.8767	2.08366	0.0408766	1	0.00511319	0.436686	0.0586243	0.449094	0.0112077	0.231251	1.32861e+08	1.81944e+07	2.76837e+08	3.79838e+08
CaO19.7306; CAALFM_CR09100CA	A0A1D8PTW9	Pyridoxine 4-dehydrogenase OS=Candida albicans (strain SC5314 / ATCC MYA-2876) OX=237561 GN=CAALFM_CR09100CA PE=4 SV=1	33	561	0.163324	57	7	7	0	Acetyl [N-Term]	349	39	5.6	344	4127.24	24.95	0	27.479				Pf00248	3641928	W5Q_06362; I503_06308	Vitamin B6 metabolism; Metabolic pathways	-16.2456	-1.78992	19.1855	2.11384	-4.02197	-0.839896	4.26195	1.07987	0.0615553	0.558684	19.1855	2.11384	0.0409655	0.0590505	0.000171108	0.146893	0.0823812	0.0247982	0.000364626	0.0793128	2.94153e+06	181067	6.21793e+06	3.47386e+06
CaO19.4477; CSH1; CaO19.11957	Q59QH2	Csh1p OS=Candida albicans (strain SC5314 / ATCC MYA-2876) OX=237561 GN=CSH1 PE=4 SV=1	10	472	0.225519	76	4	4	0		337	38.2	6.34	377	4459.48	27.83	0	16.031	metabolic process	cell surface;cytosol	catalytic activity	Pf00248	3646427	W5Q_00391		-1.63137	-2.52244	-1.04788	1.47555	-0.706086	-1.33482	-0.0674788	0.561258	0.612981	0.396441	0.954304	1.47555	0.0413996	0.235975	1	1	0.0146158	0.157492	0.931755	0.322037	5.27615e+06	3.23418e+06	7.78524e+06	3.08639e+06
SEC13	Q5AEF2	Protein transport protein SEC13 OS=Candida albicans (strain SC5314 / ATCC MYA-2876) OX=237561 GN=SEC13 PE=1 SV=2	40	379	0.342282	102	7	7	0		298	33	5.62	348	5372.72	8.14	0	29.267	transport	endoplasmic reticulum;membrane;nucleus	protein binding	Pf00400	3638425	W5Q_02872; I503_02865	RNA transport; Protein processing in endoplasmic reticulum	-2.82929	-2.81399	3.22303	3.2056	-1.50044	-1.49262	1.68842	1.6806	0.353446	0.355367	3.22303	3.2056	0.0414512	0.506062	0.0268795	0.415702	0.0310976	0.377679	0.0226919	0.349314	4.28247e+06	1.51362e+06	1.37279e+07	4.87845e+06
MET6	P82610	5-methyltetrahydropteroyltriglutamate--homocysteine methyltransferase OS=Candida albicans (strain SC5314 / ATCC MYA-2876) OX=237561 GN=MET6 PE=1 SV=2	63	62	2.59322	1989	37	37	0		767	85.6	5.6	16537	170654	1131.12	0	324.576	metabolic process;regulation of biological process;response to stimulus	cell surface;nucleus	catalytic activity;metal ion binding	Pf01717, Pf08267	3640084	W5Q_05621; I503_05584	Biosynthesis of secondary metabolites; Metabolic pathways; Biosynthesis of amino acids; Cysteine and methionine metabolism; Selenocompound metabolism	-7.21375	-1.9268	11.6099	3.10102	-2.85075	-0.946209	3.53728	1.63274	0.138624	0.518995	11.6099	3.10102	0.0416656	0.00985664	0.0011483	0.00565499	0.0593891	0.00466322	0.00203094	0.00461657	1.95257e+08	2.70673e+07	6.05496e+08	3.14249e+08
SIS1	Q59V92	Type II HSP40 co-chaperone OS=Candida albicans (strain SC5314 / ATCC MYA-2876) OX=237561 GN=SIS1 PE=4 SV=1	27	217	0.74344	255	10	10	0		343	36.8	8.85	1974	17780.3	89.36	0	50.975	metabolic process		protein binding	Pf00226, Pf01556	3644841	W5Q_06069; I503_06027		-5.67427	-1.83005	9.81601	3.16583	-2.50443	-0.87188	3.29514	1.66258	0.176234	0.546434	9.81601	3.16583	0.0417893	1	0.00548395	0.389385	0.0523293	0.498253	0.00903518	0.323692	1.72526e+07	3.04049e+06	5.46187e+07	2.98455e+07
CaO19.9997; CaO19.2460; CAALFM_C105890WA	A0A1D8PDR3	Uncharacterized protein OS=Candida albicans (strain SC5314 / ATCC MYA-2876) OX=237561 GN=orf19.2460 PE=4 SV=1	15	586	0.150997	53	3	3	0		351	37	6.14	333	3256.57	17.73	0	15.49					3639876			-30.4485	-2.56639	16.1505	1.36126	-4.9283	-1.35974	4.01351	0.444947	0.0328423	0.389653	16.1505	1.36126	0.0424506	0.0667096	0.00645151	1	0.104605	0.0453538	0.0129466	0.53491	982136	32255.6	1.33695e+06	520945
CaO19.11397; CaO19.3915; CAALFM_C504300CA	Q5AKA5	Cys-Gly metallodipeptidase DUG1 OS=Candida albicans (strain SC5314 / ATCC MYA-2876) OX=237561 GN=DUG1 PE=1 SV=1	29	352	0.37732	183	10	10	0	Acetyl [N-Term]	485	53.6	5.24	1094	13903.9	41.61	0	43.633	metabolic process	cytoplasm	catalytic activity;metal ion binding	Pf01546, Pf07687	3636456		Metabolic pathways; Glutathione metabolism	-1.98536	1.03875	4.94641	2.39849	-0.989403	0.054851	2.30638	1.26213	0.503686	1.03875	4.94641	2.39849	0.042788	1	0.00993875	0.277154	0.0211673	0.926851	0.0114613	0.174902	6.66798e+06	3.35857e+06	1.59931e+07	1.66129e+07
CaO19.11133; CaO19.3649; CAALFM_C600760WA	Q59NN8	Hsp70 nucleotide exchange factor FES1 OS=Candida albicans (strain SC5314 / ATCC MYA-2876) OX=237561 GN=FES1 PE=3 SV=2	52	176	0.933099	265	11	11	0		284	31.8	4.72	1855	18892.5	116.72	0	58.925	regulation of biological process	cytoplasm		Pf08609	3647080	W5Q_04665; I503_04641		-240.581	-2.52572	1789.8	18.7901	-7.91038	-1.33669	10.8056	4.2319	0.00415661	0.395927	1789.8	18.7901	0.0428585	0.148203	0.00863966	0.00884401	0.169513	0.0990509	0.0466783	0.0187135	5.67375e+06	23583.5	1.0661e+08	4.22099e+07
CQR2; PST2	Q59Y37	Pst2p OS=Candida albicans (strain SC5314 / ATCC MYA-2876) OX=237561 GN=PST2 PE=4 SV=1	41	492	0.21393	43	3	3	0		201	21.7	7.06	110	2934.74	14.33	0	19.77	metabolic process	membrane	catalytic activity;nucleotide binding	Pf00258, Pf02525, Pf03358	3643909	W5Q_02277; I503_02291	Biosynthesis of secondary metabolites; Ubiquinone and other terpenoid-quinone biosynthesis	-250.686	-2.71749	862.541	9.35013	-7.96974	-1.44227	9.75245	3.22499	0.00398906	0.367987	862.541	9.35013	0.0429056	0.112112	0.000235252	0.0197064	0.170973	0.0808482	0.00114714	0.0317765	416758	1662.47	3.89674e+06	1.43395e+06
CaO19.12363; CaO19.4898; CAALFM_C110280CA	Q5AP65	Protein FMP52, mitochondrial OS=Candida albicans (strain SC5314 / ATCC MYA-2876) OX=237561 GN=FMP52 PE=3 SV=1	49	254	0.593886	136	8	8	0	Acetyl [N-Term]	229	24.3	8.98	1579	14537.6	25.72	0	38.103		membrane;mitochondrion	catalytic activity	Pf01370, Pf08732, Pf13460	3634902	W5Q_00992; I503_00999		-12.2187	1.07367	58.9855	4.49623	-3.61102	0.102551	5.88229	2.16872	0.0818416	1.07367	58.9855	4.49623	0.043023	1	0.00575791	0.0585325	0.0776785	0.861713	0.0169348	0.0634701	7.69357e+06	629654	3.4592e+07	3.71404e+07
CaO19.3488; CAALFM_CR07700WA	A0A1D8PTJ6	Uncharacterized protein OS=Candida albicans (strain SC5314 / ATCC MYA-2876) OX=237561 GN=CAALFM_CR07700WA PE=4 SV=1	21	607	0.138958	56	6	6	0	Acetyl [N-Term]	403	45.5	8.78	167	2660.68	4.47	0	19.38	metabolic process		catalytic activity;nucleotide binding	Pf01633, Pf01636, Pf02958, Pf07914	3648195	W5Q_06222; I503_06177		-5.21637	-3.28267	25.8701	16.2801	-2.38305	-1.71487	4.69321	4.02503	0.191704	0.30463	25.8701	16.2801	0.0430584	0.504387	0.13667	0.139888	0.0513051	0.432479	0.32071	0.281527	298183	57162.9	4.85444e+06	1.47881e+06
RUB1	A0A1D8PJP6	NEDD8 family protein OS=Candida albicans (strain SC5314 / ATCC MYA-2876) OX=237561 GN=RUB1 PE=4 SV=1	61	480	0.220779	17	3	3	0		77	8.5	5.38	252	1422.75	11.59	0	19.836	metabolic process		protein binding	Pf00240, Pf11976	30515194	W5Q_02857; I503_02850		-385.941	-104.542	24.4303	6.6176	-8.59224	-6.70794	4.6106	2.72631	0.00259107	0.0095655	24.4303	6.6176	0.0431045	0.105942	0.142183	0.31064	0.185182	0.355327	0.327775	0.423451	641616	1662.47	4.24595e+06	40614.7
PMI1	P34948	Mannose-6-phosphate isomerase OS=Candida albicans (strain SC5314 / ATCC MYA-2876) OX=237561 GN=PMI1 PE=1 SV=2	44	258	0.575964	254	11	11	0		441	48.8	5.33	1738	18962	111.07	0	65.473	cell organization and biogenesis;metabolic process	cytoplasm	catalytic activity;metal ion binding	Pf01238	3643795		Metabolic pathways; Biosynthesis of secondary metabolites; Amino sugar and nucleotide sugar metabolism; Fructose and mannose metabolism	-8.1544	-1.29851	24.0432	3.82864	-3.02758	-0.376852	4.58756	1.93683	0.122633	0.770116	24.0432	3.82864	0.0432895	1	0.00029873	0.120555	0.0655312	0.565269	0.000685221	0.116748	6.09769e+06	747779	2.33458e+07	1.7979e+07
CaO19.2653; CAALFM_C503260CA	A0A1D8PNM6	Uncharacterized protein OS=Candida albicans (strain SC5314 / ATCC MYA-2876) OX=237561 GN=orf19.2653 PE=4 SV=1	1	976	0.0219579	24	1	1	0		1093	125.8	8.06	267	1855.46	13.73	0.002	4.678		membrane		Pf00209, Pf06011	3646360			-2.69313	-1.30765	-1.35091	-2.78223	-1.42929	-0.38698	-0.433934	-1.47624	0.371314	0.764729	0.740241	0.359424	0.0433557	0.998231	1	0.0315729	0.0309839	0.193148	0.339095	0.0233046	1.19352e+06	443170	428979	328052
PGK1	P46273	Phosphoglycerate kinase OS=Candida albicans (strain SC5314 / ATCC MYA-2876) OX=237561 GN=PGK1 PE=3 SV=1	76	11	9.41966	3928	38	38	0		417	45.2	6.48	30757	309437	1893.78	0	340.466	cell organization and biogenesis;metabolic process;regulation of biological process;response to stimulus	cell surface;cytoplasm;extracellular;membrane	catalytic activity;nucleotide binding;protein binding	Pf00162	3647081	W5Q_04664; I503_04640	Biosynthesis of antibiotics; Glycolysis / Gluconeogenesis; Carbon metabolism; Biosynthesis of secondary metabolites; Metabolic pathways; Biosynthesis of amino acids	-8.5875	-2.45234	15.3696	4.38911	-3.10224	-1.29416	3.94201	2.13393	0.116448	0.407774	15.3696	4.38911	0.0435091	0.0536001	0.0364468	0.00399131	0.0674877	0.0346835	0.0718369	0.00425859	7.23317e+08	8.42291e+07	3.17472e+09	1.29457e+09
CSN2; CAALFM_C209560CA	A0A1D8PIE9	Uncharacterized protein OS=Candida albicans (strain SC5314 / ATCC MYA-2876) OX=237561 GN=orf19.1400 PE=4 SV=1	2	1094	0.00401606	3	1	1	0		747	86.6	4.84	54	262	2.08	0.003	4.186			protein binding		3643813			-6.22416	-4.69126	3.63706	2.74132	-2.63788	-2.22997	1.86277	1.45487	0.160664	0.213163	3.63706	2.74132	0.0438302	0.266771	0.0356593	0.541775	0.0578094	0.297446	0.0332126	0.394106	197657	31756.5	541841	115500
TRX1	A0A1D8PU69	Thioredoxin OS=Candida albicans (strain SC5314 / ATCC MYA-2876) OX=237561 GN=TRX1 PE=3 SV=1	69	8	11.233	1157	9	9	0	Acetyl [N-Term]	103	11.5	5.06	9359	109108	569.58	0	104.392	cellular homeostasis;metabolic process;regulation of biological process;response to stimulus	cytosol;nucleus	catalytic activity	Pf00085, Pf08534, Pf13098, Pf13905, Pf14595	3638950	W5Q_06475; I503_06421		-18.3261	-1.36855	99.0781	7.39894	-4.19582	-0.452647	6.63049	2.88732	0.0545671	0.730701	99.0781	7.39894	0.0440897	0.98775	0.00117922	0.00344552	0.0924964	0.223551	0.0039094	0.00497416	2.4962e+08	1.3621e+07	1.84692e+09	1.34955e+09
CAALFM_C404390WA	A0A1D8PM41	Ribosomal 60S subunit protein L22B OS=Candida albicans (strain SC5314 / ATCC MYA-2876) OX=237561 GN=orf19.1409.1 PE=4 SV=1	41	86	1.84677	229	4	4	0		124	14.1	5.36	1674	18609.8	157.7	0	41.332	metabolic process	ribosome	structural molecule activity	Pf01776	30515267	W5Q_03742; I503_03736		-12.0747	-1.60391	31.3091	4.15885	-3.59392	-0.681595	4.96851	2.05619	0.0828176	0.623476	31.3091	4.15885	0.0442971	0.758487	0.00461031	0.0461636	0.0796001	0.258491	0.0114532	0.0474604	2.65293e+07	2.19709e+06	1.10331e+08	6.87889e+07
CaJ7_0441; PRB12; CAALFM_C703860WA	A0A1D8PRH0	Proteinase B OS=Candida albicans (strain SC5314 / ATCC MYA-2876) OX=237561 GN=orf19.7196 PE=3 SV=1	23	467	0.229209	113	7	7	0		493	52.1	5.74	1145	10339.2	77.55	0	49.015	metabolic process		catalytic activity	Pf00082, Pf05922	3643144	W5Q_05415; I503_05378		-22.8039	-2.51535	25.6193	2.8259	-4.51121	-1.33076	4.67916	1.49871	0.0438522	0.397559	25.6193	2.8259	0.0443111	0.774857	0.000677418	0.658917	0.0999483	0.515574	0.00158487	0.493762	5.32393e+06	233466	1.50449e+07	5.98123e+06
MNN25; MNN2	Q59WF4	Alpha-1,2-mannosyltransferase MNN2 OS=Candida albicans (strain SC5314 / ATCC MYA-2876) OX=237561 GN=MNN2 PE=1 SV=2	11	752	0.0737018	44	4	4	0		597	69.1	6.27	265	2859.51	16.16	0	15.516	cell communication;metabolic process;response to stimulus	Golgi;membrane	catalytic activity	Pf11051	3644405		Other types of O-glycan biosynthesis	-10.179	-21.7248	-5.05278	-2.36745	-3.34753	-4.44127	-2.33708	-1.24334	0.0982412	0.0460304	0.197911	0.422395	0.044393	0.0925164	0.000590334	0.447444	0.0743035	0.205445	0.000689828	0.278161	3.65423e+06	358996	1.54353e+06	71049.1
VMA10	Q59U85	V-type proton ATPase subunit G OS=Candida albicans (strain SC5314 / ATCC MYA-2876) OX=237561 GN=VMA10 PE=3 SV=1	69	369	0.353982	40	6	6	0	Acetyl [N-Term]	113	12.8	7.39	231	2116.57	0	0	16.047	transport		catalytic activity;transporter activity	Pf03179	3645215	W5Q_02179; I503_02195	Oxidative phosphorylation; Phagosome; Metabolic pathways	-3.19532	-3.57097	3.13651	3.50525	-1.67596	-1.83631	1.64916	1.80952	0.312958	0.280036	3.13651	3.50525	0.0444031	0.469164	0.358781	0.472104	0.0372089	0.430766	0.295844	0.427139	4.5142e+06	1.41275e+06	1.58234e+07	4.43112e+06
CaO19.3688; CAALFM_C102310CA	Q59W04	EKC/KEOPS complex subunit GON7 OS=Candida albicans (strain SC5314 / ATCC MYA-2876) OX=237561 GN=GON7 PE=3 SV=1	14	421	0.280992	34	1	1	0		121	13.4	5.1	398	2253.95	5.19	0	5.96	metabolic process;regulation of biological process	chromosome;nucleus		Pf08738	3644570	W5Q_00222; I503_00221		-163.006	-1.65175	189.074	1.9159	-7.34878	-0.723994	7.56281	0.938021	0.00613473	0.605419	189.074	1.9159	0.0444731	0.953937	0.0036994	0.7542	0.163411	0.345322	0.0139889	0.353728	1.76768e+06	10844.2	3.38669e+06	2.05037e+06
TUB2	A0A1D8PC97	Tubulin beta chain OS=Candida albicans (strain SC5314 / ATCC MYA-2876) OX=237561 GN=TUB2 PE=3 SV=1	30	215	0.74833	336	9	9	0		449	50	4.78	2352	24119	134.12	0	64.565	cell organization and biogenesis;response to stimulus	cytoplasm;cytoskeleton	catalytic activity;nucleotide binding;structural molecule activity	Pf00091, Pf03953, Pf10644	3639329	W5Q_00065; I503_00065		-2.24768	-1.33458	3.13859	1.86357	-1.16844	-0.416389	1.65012	0.898068	0.444903	0.749298	3.13859	1.86357	0.044543	1	0.0151081	0.762391	0.0260229	0.597719	0.0124651	0.34234	1.89435e+07	8.428e+06	3.53024e+07	2.6452e+07
SOD2	Q5A8Z4	Superoxide dismutase OS=Candida albicans (strain SC5314 / ATCC MYA-2876) OX=237561 GN=SOD2 PE=3 SV=1	30	148	1.11111	260	4	3	0		234	26.2	8.94	1498	16784.6	81.83	0	26.275	metabolic process;response to stimulus	mitochondrion	antioxidant activity;catalytic activity;metal ion binding	Pf00081, Pf02777	3640231	W5Q_00143; I503_00145	Longevity regulating pathway - multiple species; Peroxisome	-6.90291	-2.15711	20.9109	6.5345	-2.7872	-1.1091	4.38618	2.70808	0.144867	0.463584	20.9109	6.5345	0.0446481	0.143391	0.00214594	0.0138907	0.0622217	0.0795173	0.00470624	0.0188086	2.82193e+06	408803	1.84399e+07	8.54844e+06
RPS20	Q5A389	Ribosomal 40S subunit protein S20 OS=Candida albicans (strain SC5314 / ATCC MYA-2876) OX=237561 GN=RPS20 PE=3 SV=1	49	197	0.815126	97	6	6	0		119	13.3	9.94	542	5193.35	18.67	0	23.47	metabolic process	ribosome	RNA binding;structural molecule activity	Pf00338	3642071	W5Q_06273; I503_06220	Ribosome	-3.15185	-6.95056	2.16225	4.76826	-1.6562	-2.79713	1.11253	2.25346	0.317274	0.143873	2.16225	4.76826	0.0448779	0.278055	0.432797	0.375252	0.0371634	0.388878	0.240751	0.422808	5.67621e+06	1.80091e+06	2.70657e+07	3.89403e+06
CaO19.11759; CaO19.4283; CAALFM_C502660CA	Q5AG96	Uncharacterized protein OS=Candida albicans (strain SC5314 / ATCC MYA-2876) OX=237561 GN=orf19.4283 PE=4 SV=1	46	256	0.58209	195	10	10	0		335	37.2	5.54	1512	15696.3	115.34	0	60.159	metabolic process	cytoplasm	protein binding;RNA binding	Pf01398	3637771	I503_04293	RNA transport	-7.85014	-1.91126	102.768	25.0208	-2.97272	-0.934524	6.68325	4.64506	0.127386	0.523215	102.768	25.0208	0.0450932	0.667092	0.0367763	0.0164736	0.0670246	0.311707	0.122892	0.0382603	2.27939e+06	290363	5.70322e+07	2.98401e+07
GLC3	A0A1D8PQ59	1,4-alpha-glucan branching enzyme OS=Candida albicans (strain SC5314 / ATCC MYA-2876) OX=237561 GN=GLC3 PE=4 SV=1	5	854	0.0438596	30	2	2	0		684	78.6	6.28	118	1370.99	4.1	0	6.301	metabolic process		catalytic activity	Pf00128, Pf02806, Pf02922	3639200			5.05478	1.00652	1.14688	5.75965	2.33765	0.00937797	0.197713	2.52598	5.05478	1.00652	1.14688	5.75965	0.0454217	1	1	0.267134	0.0530899	0.993826	0.72733	0.337388	98936.4	500101	569839	573556
RPL43A	A0A1D8PP14	Ribosomal 60S subunit protein L43A OS=Candida albicans (strain SC5314 / ATCC MYA-2876) OX=237561 GN=RPL43A PE=3 SV=1	28	621	0.130435	12	2	2	0		92	10.1	10.68	56	439.62	0	0	6.075	metabolic process	ribosome	structural molecule activity	Pf01780	30515319	W5Q_04479; I503_04475		-5.82907	-9.13282	5.80079	9.0885	-2.54327	-3.19106	2.53625	3.18404	0.171554	0.109495	5.80079	9.0885	0.045459	0.207687	0.15887	0.207826	0.0578071	0.331371	0.201467	0.330863	170721	29287.8	1.5516e+06	169893
CaO19.1889; CAALFM_C207420WA	A0A1D8PHW0	Sedoheptulose-bisphosphatase OS=Candida albicans (strain SC5314 / ATCC MYA-2876) OX=237561 GN=orf19.1889 PE=4 SV=1	21	324	0.420833	101	3	3	0		240	27.2	6.35	673	5830.92	20.85	0	22.643				Pf00300	3645202	W5Q_02162; I503_02178	Glycolysis / Gluconeogenesis; Biosynthesis of amino acids; Biosynthesis of antibiotics; Biosynthesis of secondary metabolites; Carbon metabolism; Glycine, serine and threonine metabolism; Metabolic pathways; Methane metabolism	-5.25556	-1.0657	15.0005	3.04174	-2.39385	-0.0918059	3.90694	1.6049	0.190275	0.938347	15.0005	3.04174	0.0454613	1	0.0377825	0.0344829	0.0544137	0.885668	0.073807	0.0276708	4.76717e+06	907071	1.45005e+07	1.36065e+07
HNT1	Q59WG0	Adenosine 5'-monophosphoramidase OS=Candida albicans (strain SC5314 / ATCC MYA-2876) OX=237561 GN=HNT1 PE=1 SV=1	38	53	2.98026	453	5	5	0		152	17	6.86	1938	31177.2	153.39	0	38.844			catalytic activity	Pf01230, Pf11969	3644441	W5Q_01042; I503_01052		-17.0884	1.64424	238.729	8.49644	-4.09495	0.717421	7.89923	3.08686	0.0585192	1.64424	238.729	8.49644	0.0457005	1	0.0298931	0.038125	0.0935707	0.508943	0.118066	0.0588432	2.21171e+07	1.29428e+06	1.87917e+08	3.08981e+08
GRE22; GRP2	P83775	Putative NADPH-dependent methylglyoxal reductase GRP2 OS=Candida albicans (strain SC5314 / ATCC MYA-2876) OX=237561 GN=GRP2 PE=1 SV=2	76	55	2.91496	994	19	19	0	Acetyl [N-Term]	341	37.6	6.44	10715	90536.6	470.75	0	160.914	metabolic process	cytoplasm	catalytic activity	Pf00106, Pf01073, Pf01370, Pf07993, Pf13460	3637744	W5Q_04312; I503_04312	MAPK signaling pathway - yeast; Pyruvate metabolism; Propanoate metabolism	-5.07849	-2.25551	12.6366	5.61227	-2.3444	-1.17345	3.65953	2.48859	0.196909	0.443359	12.6366	5.61227	0.0466252	0.317322	0.00261747	0.0613109	0.0546541	0.186181	0.00478936	0.0762886	8.92214e+07	1.75685e+07	5.00735e+08	2.22005e+08
CAALFM_C114090WA	A0A1D8PFU8	Uncharacterized protein OS=Candida albicans (strain SC5314 / ATCC MYA-2876) OX=237561 GN=orf19.7215.3 PE=3 SV=1	74	35	3.92453	416	8	8	0		106	11.5	8.97	2644	27360.6	145.85	0	50.184	metabolic process	cytoplasm		Pf00166	30515079	W5Q_01361; I503_01393		-2.77902	-1.48934	14.6894	7.87241	-1.47457	-0.574676	3.8767	2.9768	0.35984	0.671437	14.6894	7.87241	0.0467896	1	0.0137264	0.185053	0.0344974	0.669645	0.0266066	0.275434	6.74741e+07	2.42798e+07	5.31183e+08	3.56656e+08
CaO19.3341; CAALFM_C101530CA	A0A1D8PCI5	Arginine--tRNA ligase OS=Candida albicans (strain SC5314 / ATCC MYA-2876) OX=237561 GN=orf19.3341 PE=3 SV=1	11	933	0.0289389	18	4	4	0		622	70.7	6.13	51	764.63	0	0	10.228	metabolic process	cytoplasm	catalytic activity;nucleotide binding	Pf00750, Pf03485, Pf05746	3640232	W5Q_00144; I503_00146	Aminoacyl-tRNA biosynthesis	-1.75221	-1.55444	1.76862	1.569	-0.809176	-0.636399	0.822622	0.649844	0.570708	0.643317	1.76862	1.569	0.0468667	0.875078	0.502244	0.572514	0.0189617	0.278449	0.206579	0.186023	998155	569655	1.5661e+06	1.0075e+06
	P43065	Saccharopine dehydrogenase [NAD(+), L-lysine-forming] OS=Candida albicans (strain SC5314 / ATCC MYA-2876) OX=237561 GN=LYS1 PE=3 SV=1	23	669	0.109948	42	7	7	0		382	42.4	5.44	188	2145.82	6.71	0	25.96	metabolic process		catalytic activity	Pf01262, Pf05222				-5.20443	-14.7221	1.56501	4.42706	-2.37974	-3.87992	0.646172	2.14635	0.192144	0.0679249	1.56501	4.42706	0.0470703	0.186559	1	0.412091	0.0560076	0.361916	0.383938	0.442246	1.72352e+06	331164	7.63012e+06	518275
SDT1; CAALFM_C504360CA	Q5AK98	Nucleotidase OS=Candida albicans (strain SC5314 / ATCC MYA-2876) OX=237561 GN=orf19.3922 PE=4 SV=1	18	428	0.275261	79	4	4	0		287	33.2	5.66	318	4283.45	13.28	0	18.141				Pf00702, Pf13419	3636483	W5Q_04456; I503_04452	Nicotinate and nicotinamide metabolism	-3.73112	-6.53556	5.55386	9.72834	-1.89961	-2.70831	2.47349	3.28219	0.268016	0.153009	5.55386	9.72834	0.0475344	0.144248	0.0538868	0.106155	0.0451484	0.195335	0.0666443	0.17421	1.15606e+06	309842	1.12465e+07	1.72082e+06
ETR2; MRF1	Q59TU5	Mrf1p OS=Candida albicans (strain SC5314 / ATCC MYA-2876) OX=237561 GN=MRF1 PE=4 SV=1	52	345	0.387187	139	10	10	0		359	38.6	6.83	797	8463.65	51.97	0	45.353	metabolic process	mitochondrion	catalytic activity	Pf00107, Pf08240	3645321	W5Q_01132; I503_01142	Metabolic pathways; Fatty acid elongation; Fatty acid metabolism	-6.37205	-2.91553	10.6097	4.85446	-2.67176	-1.54376	3.40731	2.27931	0.156935	0.342991	10.6097	4.85446	0.0476454	0.128726	0.00757853	0.0531427	0.0636484	0.0993609	0.0129112	0.0605644	3.68352e+06	578076	1.78815e+07	6.13319e+06
CYC1	P53698	Cytochrome c OS=Candida albicans (strain SC5314 / ATCC MYA-2876) OX=237561 GN=CYC1 PE=3 SV=3	39	101	1.63636	180	4	4	0		110	12.2	9.66	819	8401.6	16.67	0	17.112	metabolic process;transport	mitochondrion	metal ion binding	Pf00034, Pf13442	3643937	W5Q_02432; I503_02436	Metabolic pathways; Sulfur metabolism	-3.58356	-10.558	3.80103	11.1987	-1.84139	-3.40026	1.92639	3.48526	0.279052	0.0947153	3.80103	11.1987	0.0477958	0.125592	0.229478	0.120735	0.0440054	0.213523	0.221032	0.210395	2.01202e+07	5.61458e+06	2.2532e+08	2.13412e+07
ATP1	A0A1D8PDC4	ATP synthase subunit alpha OS=Candida albicans (strain SC5314 / ATCC MYA-2876) OX=237561 GN=ATP1 PE=3 SV=1	41	102	1.62821	889	18	18	0		546	58.9	9.04	8600	66597.8	418.39	0	144.52	metabolic process;transport	cell surface;membrane	catalytic activity;nucleotide binding;transporter activity	Pf00006, Pf00306, Pf02874	3646134	W5Q_00450; I503_00453		-1.80207	-9.08966	1.83968	9.27937	-0.849655	-3.18423	0.879456	3.21403	0.554917	0.110015	1.83968	9.27937	0.0480406	0.133538	0.638784	0.131247	0.020409	0.212607	0.280891	0.210916	5.88045e+07	3.26316e+07	5.45669e+08	6.00318e+07
CaO19.9842; CaO19.2306; CAALFM_C111100WA	Q59WJ5	1,2-dihydroxy-3-keto-5-methylthiopentene dioxygenase OS=Candida albicans (strain SC5314 / ATCC MYA-2876) OX=237561 GN=ADI1 PE=3 SV=1	13	674	0.106742	19	2	2	0		178	21	5.14	57	813.92	0	0.002	5.537	metabolic process;regulation of biological process	cytoplasm;nucleus	catalytic activity;metal ion binding	Pf00190, Pf02311, Pf03079, Pf07883	3644414	W5Q_01074; I503_01084	Metabolic pathways; Cysteine and methionine metabolism	-29.9561	3.11896	389.531	4.16916	-4.90478	1.64106	8.60559	2.05976	0.0333822	3.11896	389.531	4.16916	0.048454	0.0370353	0.00119294	0.0874558	0.118828	0.0303886	0.00513298	0.0900687	49801	1662.47	207628	647583
CHT2	P40953	Chitinase 2 OS=Candida albicans (strain SC5314 / ATCC MYA-2876) OX=237561 GN=CHT2 PE=1 SV=2	18	242	0.619211	361	6	6	0		583	60.8	4.89	3668	35707.2	306.63	0	52.125	cell communication;metabolic process;response to stimulus	cell surface;extracellular;membrane	catalytic activity	Pf00704	3636523		Metabolic pathways; Amino sugar and nucleotide sugar metabolism	-3.08432	-3.48236	1.0822	1.22186	-1.62495	-1.80006	0.113962	0.289074	0.324221	0.287162	1.0822	1.22186	0.0485015	0.073145	1	1	0.0394063	0.0658328	0.555472	0.617733	3.84588e+07	1.24691e+07	4.69911e+07	1.3494e+07
HHO1	A0A1D8PR93	Histone OS=Candida albicans (strain SC5314 / ATCC MYA-2876) OX=237561 GN=HHO1 PE=3 SV=1	19	487	0.216667	39	4	4	0		180	18.5	10.61	269	2494.62	5.77	0	11.735	cell organization and biogenesis	chromosome;nucleus	DNA binding	Pf00538	30515358	W5Q_05348		-5.32333	-2.09015	12.6906	4.98284	-2.41233	-1.0636	3.66569	2.31697	0.187852	0.478436	12.6906	4.98284	0.0489255	0.820977	0.062197	0.199502	0.0590122	0.436597	0.113998	0.231119	752629	141383	3.75023e+06	1.79424e+06
PFK1	Q5AK53	ATP-dependent 6-phosphofructokinase OS=Candida albicans (strain SC5314 / ATCC MYA-2876) OX=237561 GN=PFK1 PE=3 SV=1	10	823	0.0526849	52	8	8	0		987	108.5	6.62	223	2799.82	7.33	0	22.126	metabolic process	cytoplasm	catalytic activity;metal ion binding;nucleotide binding	Pf00365	3636448	W5Q_04501; I503_04497	Biosynthesis of amino acids; Glycolysis / Gluconeogenesis; Metabolic pathways; Biosynthesis of secondary metabolites; RNA degradation; Galactose metabolism; Carbon metabolism; Pentose phosphate pathway; Fructose and mannose metabolism; Biosynthesis of antibiotics; Methane metabolism	-4.32903	-6.59238	6.30819	9.6063	-2.11405	-2.7208	2.65723	3.26398	0.230998	0.15169	6.30819	9.6063	0.0498342	0.172119	0.077396	0.129879	0.0526759	0.23415	0.102829	0.211961	1.51686e+06	350392	1.45714e+07	2.21034e+06
CaJ7_0021; CaO19.7109; CAALFM_C700140CA	A0A1D8PQI0	Uncharacterized protein OS=Candida albicans (strain SC5314 / ATCC MYA-2876) OX=237561 GN=orf19.7109 PE=4 SV=1	52	547	0.170455	30	7	7	0	Acetyl [N-Term]	176	19.8	4.3	206	1567.06	7.05	0	20.748			protein binding	Pf00023, Pf12796, Pf13637, Pf13857	3637974	W5Q_05069; I503_05025		-18.1045	-53.1029	8.86143	25.9917	-4.17828	-5.73072	3.14754	4.69998	0.0552349	0.0188314	8.86143	25.9917	0.0507334	0.132048	0.2144	0.164707	0.105989	0.378365	0.337416	0.387059	677735	37434.6	1.76155e+07	331724
MXR1	Q5AD39	Peptide-methionine-S-sulfoxide reductase OS=Candida albicans (strain SC5314 / ATCC MYA-2876) OX=237561 GN=MXR1 PE=3 SV=1	32	178	0.886486	164	5	5	0		185	21.1	6.92	1537	12554.9	88.46	0	22.893	metabolic process		catalytic activity	Pf01625	3638881	W5Q_01542; I503_01535		-5.59548	-1.20956	29.5442	6.38648	-2.48426	-0.274484	4.8848	2.67502	0.178716	0.826746	29.5442	6.38648	0.0509676	1	0.0180266	0.0429563	0.0633084	0.7001	0.0440282	0.0574545	1.06564e+07	1.90446e+06	6.80568e+07	5.62657e+07
CaO19.4278; CAALFM_C502620CA; CaO19.11754	Q5AGA2	Uncharacterized protein OS=Candida albicans (strain SC5314 / ATCC MYA-2876) OX=237561 GN=orf19.4278 PE=4 SV=1	9	732	0.083707	56	3	3	0		669	77.4	5.35	197	2893.64	2.48	0	11.518			protein binding	Pf00628, Pf07744	3637783	W5Q_04289; I503_04285; I503_04289		-4.52732	-2.04362	25.0049	11.2872	-2.17866	-1.03113	4.64414	3.49661	0.220881	0.489327	25.0049	11.2872	0.0510196	0.26038	0.00889047	0.0113608	0.0555771	0.134242	0.0206443	0.0198621	387160	85516.4	4.36994e+06	2.13833e+06
AGE3; GCS1	A0A1D8PCP6	Age3p OS=Candida albicans (strain SC5314 / ATCC MYA-2876) OX=237561 GN=AGE3 PE=4 SV=1	27	498	0.208443	79	8	8	0		379	41.9	6.2	412	4606.32	12.77	0	27.245	cell organization and biogenesis;regulation of biological process;response to stimulus;transport		enzyme regulator activity;metal ion binding	Pf01412	3644565	W5Q_00217		-6.84649	-1.35844	29.7155	5.89597	-2.77536	-0.441952	4.89314	2.55973	0.14606	0.736138	29.7155	5.89597	0.0513008	1	0.0155504	0.268793	0.0711892	0.759995	0.0380452	0.344018	2.35568e+06	344071	1.3889e+07	1.02242e+07
NAN1	Q5AFB9	Nan1p OS=Candida albicans (strain SC5314 / ATCC MYA-2876) OX=237561 GN=NAN1 PE=4 SV=1	3	897	0.0357569	30	1	1	0		839	94	7.37	277	2584.85	20.07	0	7.62			protein binding		3637932		Ribosome biogenesis in eukaryotes	-234.424	1.13914	784.937	2.93938	-7.87298	0.187942	9.61643	1.55551	0.00426577	1.13914	784.937	2.93938	0.0513816	1	5.36597e-05	0.337992	0.202263	0.779615	0.000258007	0.262875	389723	1662.47	1.14555e+06	1.30493e+06
RPN8	A0A1D8PNA8	Proteasome regulatory particle lid subunit OS=Candida albicans (strain SC5314 / ATCC MYA-2876) OX=237561 GN=RPN8 PE=4 SV=1	55	113	1.50909	498	14	14	0	Acetyl [N-Term]	330	36.7	5.47	5184	41423.2	298	0	99.658	response to stimulus	proteasome	protein binding	Pf01398, Pf13012	3643770		Proteasome	-6.00495	-2.46528	25.6232	10.5194	-2.58615	-1.30175	4.67938	3.39498	0.166529	0.405634	25.6232	10.5194	0.0514232	0.201187	0.00536717	0.023596	0.0664941	0.130947	0.0125575	0.0400539	1.4281e+07	2.37821e+06	1.50227e+08	6.09373e+07
TFP1	Q5AJB1	V-type proton ATPase catalytic subunit A OS=Candida albicans (strain SC5314 / ATCC MYA-2876) OX=237561 GN=TFP1 PE=1 SV=2	30	220	0.729335	450	15	15	0		617	67.6	5.27	2787	28118.9	147.5	0	81.683	cellular homeostasis;metabolic process;response to stimulus;transport	cytoplasm;cytosol;membrane;vacuole	catalytic activity;nucleotide binding;transporter activity	Pf00006, Pf00306, Pf02874	3636662	W5Q_02652; I503_02658		-2.95813	-1.16623	7.43307	2.93045	-1.56469	-0.221852	2.89396	1.55112	0.338051	0.857464	7.43307	2.93045	0.0516115	1	0.0187919	0.350765	0.0403779	0.810489	0.0271915	0.27204	1.52163e+07	5.14389e+06	4.45907e+07	3.82349e+07
DUT1	P0CY19	Deoxyuridine 5'-triphosphate nucleotidohydrolase OS=Candida albicans (strain SC5314 / ATCC MYA-2876) OX=237561 GN=DUT1 PE=3 SV=1	84	78	2.02516	322	13	13	0	Acetyl [N-Term]	159	16.9	5.92	2742	29466.7	229.81	0	87.771	metabolic process		catalytic activity;metal ion binding	Pf00692	3640188	W5Q_00125; I503_00128	Pyrimidine metabolism; Metabolic pathways	-24.0852	-3.17964	121.716	16.0685	-4.59008	-1.66886	6.92738	4.00617	0.0415193	0.314501	121.716	16.0685	0.0516683	0.399735	0.00924638	0.101451	0.118581	0.333551	0.0320266	0.203215	1.10209e+07	457580	1.7709e+08	5.5695e+07
CaO19.1350; CAALFM_C208330WA	A0A1D8PI40	Uncharacterized protein OS=Candida albicans (strain SC5314 / ATCC MYA-2876) OX=237561 GN=orf19.1350 PE=4 SV=1	19	714	0.0903614	30	4	4	0		332	37.6	4.98	166	2343.18	17.03	0	22.164	cellular homeostasis;metabolic process;regulation of biological process	membrane	catalytic activity		3648166			-112.425	-3.98838	8.90879	-3.16409	-6.81282	-1.9958	3.15523	-1.66179	0.0088948	0.250729	8.90879	0.316047	0.0517154	0.283033	0.221598	0.407566	0.176164	0.282439	0.349597	0.338644	3.29947e+06	29348.1	1.04279e+06	261456
UTR2	Q5AJC0	Extracellular glycosidase UTR2 OS=Candida albicans (strain SC5314 / ATCC MYA-2876) OX=237561 GN=UTR2 PE=1 SV=1	24	99	1.64255	772	13	13	0		470	51.7	4.73	5407	57335	368.33	0	100.33	cell organization and biogenesis;metabolic process	cell surface;extracellular;membrane	catalytic activity	Pf00187, Pf00722	3636591	W5Q_02661; I503_02667		-3.20661	-2.35369	-1.23412	-1.68133	-1.68105	-1.23492	-0.30348	-0.749606	0.311856	0.424865	0.810295	0.594766	0.052642	0.319148	1	0.702748	0.0442469	0.197062	0.550431	0.263392	7.04926e+08	2.19835e+08	4.19266e+08	1.78131e+08
MLS1	Q5APD2	Malate synthase OS=Candida albicans (strain SC5314 / ATCC MYA-2876) OX=237561 GN=MLS1 PE=3 SV=1	25	262	0.566243	312	13	13	0		551	62.5	8.57	3078	24306.6	157.19	0	68.817	metabolic process		catalytic activity	Pf01274, Pf14679	3634875	W5Q_00935; I503_00943	Glyoxylate and dicarboxylate metabolism; Pyruvate metabolism; Biosynthesis of secondary metabolites; Metabolic pathways; Carbon metabolism	-8.14269	-2.68476	16.6654	5.49483	-3.02551	-1.42479	4.05879	2.45807	0.12281	0.372473	16.6654	5.49483	0.0536827	0.370901	0.0384821	0.124974	0.0812086	0.264228	0.0780953	0.153598	1.00832e+07	1.23831e+06	5.54053e+07	2.0637e+07
CaO19.846; CAALFM_C203760CA	A0A1D8PH10	Protein kinase OS=Candida albicans (strain SC5314 / ATCC MYA-2876) OX=237561 GN=orf19.846 PE=4 SV=1	3	882	0.037422	36	1	1	0		962	108.4	7.97	151	2600.45	2.62	0.002	5.726	metabolic process		catalytic activity;nucleotide binding	Pf00069, Pf07714	3637371			-282.743	-1.96928	1325.04	9.22874	-8.14335	-0.977668	10.3718	3.20613	0.00353678	0.5078	1325.04	9.22874	0.0537643	0.611063	0.00492376	0.0534755	0.218911	0.298708	0.0255342	0.0857248	470052	1662.47	4.33799e+06	2.20283e+06
TIM9	Q59R24	Mitochondrial import inner membrane translocase subunit TIM9 OS=Candida albicans (strain SC5314 / ATCC MYA-2876) OX=237561 GN=TIM9 PE=3 SV=2	36	168	0.988506	86	2	2	0	Acetyl [N-Term]	87	10.2	6.04	798	6391.33	39.12	0	7.764	transport	membrane;mitochondrion	metal ion binding	Pf02953	3646243	W5Q_05393; I503_05356		-4.77114	-1.13754	10.5091	2.50558	-2.25434	-0.185916	3.39356	1.32514	0.209593	0.879091	10.5091	2.50558	0.0538281	1	0.000459802	0.131411	0.0606733	0.656693	0.000780183	0.0870691	4.98469e+06	1.04476e+06	1.24895e+07	10979419
HPT1	A0A1D8PGN7	Hypoxanthine phosphoribosyltransferase OS=Candida albicans (strain SC5314 / ATCC MYA-2876) OX=237561 GN=HPT1 PE=4 SV=1	30	206	0.784038	167	5	5	0		213	24.2	5.25	1214	11474.1	57.48	0	33.597	metabolic process		catalytic activity	Pf00156	3643034	W5Q_01710; I503_01720	Biosynthesis of secondary metabolites; Metabolic pathways; Purine metabolism	-6.55302	-1.6251	12.6285	3.13176	-2.71216	-0.700525	3.65861	1.64698	0.152601	0.615348	12.6285	3.13176	0.0540624	1	0.00192936	0.253434	0.073313	0.440956	0.00352939	0.2087	6.1893e+06	944496	1.93834e+07	1.19276e+07
CaO19.633; CRG1	A0A1D8PSY8	Crg1p OS=Candida albicans (strain SC5314 / ATCC MYA-2876) OX=237561 GN=CRG1 PE=4 SV=1	37	525	0.184818	56	7	7	0		303	33.8	6.81	232	2618.67	0	0	22.302	cellular homeostasis;metabolic process		catalytic activity	Pf01209, Pf03141, Pf05891, Pf08241, Pf08242, Pf12847, Pf13489, Pf13649, Pf13847	3646393			-10.26	-5.55796	16.9189	9.1652	-3.35895	-2.47456	4.08056	3.19617	0.0974663	0.179922	16.9189	9.1652	0.054688	0.212791	0.0170392	0.144003	0.0918472	0.263281	0.0347647	0.230129	987756	96272.9	9.05298e+06	1.62883e+06
CaJ7_0069; GLN4	A0A1D8PQM9	Glutamine--tRNA ligase OS=Candida albicans (strain SC5314 / ATCC MYA-2876) OX=237561 GN=GLN4 PE=3 SV=1	10	591	0.148936	119	6	6	0		799	91.3	7.17	586	6669.85	25.86	0	24.99	metabolic process	cytoplasm	catalytic activity;nucleotide binding	Pf00749, Pf03950, Pf04557, Pf04558	3637998	W5Q_05108; I503_05064	Metabolic pathways; Aminoacyl-tRNA biosynthesis	-3.28055	-1.2448	9.1251	3.4625	-1.71394	-0.315913	3.18984	1.79182	0.304827	0.803342	9.1251	3.4625	0.0549997	1	0.00427663	0.0461073	0.047133	0.503953	0.00682088	0.0413079	1.88909e+06	575846	6.54098e+06	5.25465e+06
PRO2	Q5ADR2	Glutamate-5-semialdehyde dehydrogenase OS=Candida albicans (strain SC5314 / ATCC MYA-2876) OX=237561 GN=PRO2 PE=3 SV=1	4	832	0.0493274	22	1	1	0		446	49.1	5.74	96	1248.2	3.38	0.002	4.74	metabolic process		catalytic activity;nucleotide binding	Pf00171	3638532	W5Q_03231; I503_03231	Arginine and proline metabolism; Biosynthesis of amino acids; Carbapenem biosynthesis; Biosynthesis of secondary metabolites; Metabolic pathways; Biosynthesis of antibiotics	-5.05813	-1.25778	7.41656	1.84423	-2.3386	-0.330875	2.89075	0.883022	0.197702	0.795054	7.41656	1.84423	0.0550168	1	0.0033393	0.947869	0.0643313	0.699182	0.00482655	0.418495	679390	134316	1.25295e+06	996166
TPI1	Q9P940	Triosephosphate isomerase OS=Candida albicans (strain SC5314 / ATCC MYA-2876) OX=237561 GN=TPI1 PE=1 SV=3	54	33	4.10887	1019	13	13	0		248	26.6	6.01	5166	78986.4	564.64	0	110.703	cell communication;metabolic process;regulation of biological process;response to stimulus	cell surface;cytoplasm	catalytic activity	Pf00121	3638482	W5Q_03253; I503_03254	Biosynthesis of antibiotics; Biosynthesis of amino acids; Metabolic pathways; Inositol phosphate metabolism; Fructose and mannose metabolism; Glycolysis / Gluconeogenesis; Carbon metabolism; Biosynthesis of secondary metabolites	-9.7227	-1.85591	34.0662	6.50271	-3.28136	-0.892128	5.09027	2.70104	0.102852	0.538819	34.0662	6.50271	0.0550829	0.16473	0.0038421	0.00522884	0.0903734	0.07348	0.00977867	0.00706165	2.51153e+08	2.58316e+07	1.63318e+09	8.79986e+08
CaJ7_0084; CYB5	A0A1D8PQP7	Cyb5p OS=Candida albicans (strain SC5314 / ATCC MYA-2876) OX=237561 GN=CYB5 PE=3 SV=1	57	134	1.2381	156	3	3	0	Acetyl [N-Term]	126	14	4.59	651	17374.3	144.8	0	34.687	metabolic process	membrane	metal ion binding	Pf00173	3637965	W5Q_05123; I503_05079		-3.98126	-3.78373	2.71055	2.57607	-1.99322	-1.91981	1.43859	1.36517	0.251177	0.26429	2.71055	2.57607	0.0552433	0.172642	0.0184196	0.354785	0.0550562	0.16572	0.0132491	0.242171	1.51051e+07	3.79406e+06	3.89118e+07	1.0284e+07
ESS1	Q59KZ2	Peptidyl-prolyl cis-trans isomerase OS=Candida albicans (strain SC5314 / ATCC MYA-2876) OX=237561 GN=ESS1 PE=1 SV=1	55	277	0.531073	94	5	5	0	Acetyl [N-Term]	177	19.8	8.15	484	6958.79	45.46	0	25.547	cell communication;metabolic process;response to stimulus		catalytic activity;protein binding	Pf00397, Pf00639, Pf13145, Pf13616	3647989	W5Q_00431; I503_00434		-220.045	-2.24505	469.844	4.79367	-7.78166	-1.16675	8.87604	2.26113	0.00454452	0.445424	469.844	4.79367	0.0555117	0.509717	0.00390606	0.148703	0.215987	0.297356	0.0173352	0.168119	8.52838e+06	38757.4	4.08822e+07	1.82099e+07
VPS28	Q59SD1	Vacuolar protein sorting-associated protein 28 OS=Candida albicans (strain SC5314 / ATCC MYA-2876) OX=237561 GN=VPS28 PE=3 SV=1	13	891	0.0362903	9	2	2	0		248	28.2	5.01	128	815.77	3.35	0	10.236	cell organization and biogenesis;metabolic process;response to stimulus;transport	endosome		Pf03997	3645794	W5Q_02314; I503_02321	Endocytosis	-25.8545	-106.016	4.34346	17.8103	-4.69234	-6.72814	2.11884	4.15464	0.038678	0.00943251	4.34346	17.8103	0.056103	0.0306137	0.231511	0.0557151	0.131627	0.102987	0.245268	0.115738	42982.3	1662.47	765530	7220.86
CNB1	A0A1D8PP58	Calcineurin regulatory subunit B OS=Candida albicans (strain SC5314 / ATCC MYA-2876) OX=237561 GN=CNB1 PE=4 SV=1	58	119	1.42775	247	9	9	0		173	19.4	4.54	1840	18797.3	121.88	0	53.858	cellular homeostasis;response to stimulus		metal ion binding;protein binding	Pf00036, Pf12763, Pf13499, Pf13833	3636463	W5Q_04535; I503_04533		-28.9632	-1.9012	128.542	8.43773	-4.85615	-0.926908	7.0061	3.07686	0.0345266	0.525985	128.542	8.43773	0.0561861	0.0781794	0.000725505	0.00243244	0.136424	0.0362325	0.00254148	0.00374213	7.49639e+06	258825	6.32526e+07	3.32699e+07
MNN26; CaJ7_0410	Q59R28	Alpha-1,2-mannosyltransferase MNN26 OS=Candida albicans (strain SC5314 / ATCC MYA-2876) OX=237561 GN=MNN26 PE=3 SV=1	11	688	0.101852	77	6	6	0		756	87.2	6.52	585	5328.08	32.87	0	24.053	metabolic process	Golgi;membrane	catalytic activity	Pf11051	3646240	W5Q_05390; I503_05353		-4.7147	-2.25574	-1.05436	-2.20371	-2.23717	-1.1736	-0.0763637	-1.13993	0.212103	0.443314	0.948445	0.453781	0.0562486	0.435422	1	0.357479	0.0629187	0.255505	0.807568	0.203751	5.82937e+06	1.23642e+06	2.64526e+06	1.17268e+06
GST2	Q5AFB4	Gst2p OS=Candida albicans (strain SC5314 / ATCC MYA-2876) OX=237561 GN=GST2 PE=3 SV=1	27	592	0.146119	32	3	3	0		219	25.2	6.23	74	1907.18	7.41	0	10.119	regulation of biological process;response to stimulus		catalytic activity;protein binding	Pf00043, Pf02798, Pf13409, Pf13410, Pf13417	3637937		Glutathione metabolism	-14.8287	-1.39204	175.229	16.4495	-3.89032	-0.4772	7.4531	4.03998	0.0674368	0.718371	175.229	16.4495	0.0567235	1	0.00144553	0.00823363	0.110336	0.354205	0.00538683	0.0166318	130172	8778.37	2.14127e+06	1.53822e+06
CLC1	Q5AMQ2	Clathrin light chain OS=Candida albicans (strain SC5314 / ATCC MYA-2876) OX=237561 GN=CLC1 PE=3 SV=1	42	531	0.182222	41	7	7	0	Acetyl [N-Term]	225	26	4.55	410	3277.94	1.64	0	28.266	transport	membrane	structural molecule activity	Pf01086	3635662	W5Q_03498; I503_03490		-4.57118	-5.76588	4.79141	6.04368	-2.19257	-2.52754	2.26045	2.59543	0.218762	0.173434	4.79141	6.04368	0.0569797	0.2127	0.037089	0.20428	0.0624659	0.268803	0.041919	0.265096	1.90962e+06	417751	1.15411e+07	2.00162e+06
LDG3	A0A1D8PR06	Ldg3p OS=Candida albicans (strain SC5314 / ATCC MYA-2876) OX=237561 GN=LDG3 PE=4 SV=1	31	289	0.5	76	3	1	0		152	16.4	5.14	860	6247.76	45.45	0	14.528					3637001			-6.3319	-9.04959	8.90659	12.7294	-2.66264	-3.17785	3.15487	3.67009	0.15793	0.110502	8.90659	12.7294	0.0574591	0.267257	0.262295	0.221961	0.0764965	0.424651	0.413754	0.407308	39516.4	6240.84	503018	55584.6
GLG21; CAALFM_C101360CA	A0A1D8PCG4	Glycogenin glucosyltransferase OS=Candida albicans (strain SC5314 / ATCC MYA-2876) OX=237561 GN=orf19.3325 PE=4 SV=1	5	334	0.40303	266	3	3	0		660	75.9	4.63	808	10785	0	0	11.46			catalytic activity	Pf01501	3640191			-13.2305	1.14098	52.8684	3.50221	-3.72579	0.190274	5.72433	1.80826	0.075583	1.14098	52.8684	3.50221	0.0576004	1	0.00280919	0.0127492	0.107304	0.601679	0.00804037	0.0115269	3.81329e+07	2.8822e+06	1.33549e+08	1.52377e+08
NPL3	A0A1D8PFV4	mRNA-binding protein OS=Candida albicans (strain SC5314 / ATCC MYA-2876) OX=237561 GN=NPL3 PE=4 SV=1	27	182	0.86014	246	8	8	0	Acetyl [N-Term]	286	32.2	9.11	3702	23041.1	159.15	0	61.69	transport	nucleus	RNA binding	Pf00076, Pf13893, Pf14259	3643310	W5Q_01380; I503_01412	Basal transcription factors	-11.4237	-1.17229	90.2282	9.25912	-3.51396	-0.229325	6.49551	3.21088	0.0875374	0.853034	90.2282	9.25912	0.0576384	1	0.00926917	0.0733294	0.101269	0.789348	0.030104	0.117726	1.2786e+07	1.11925e+06	1.18387e+08	1.00988e+08
CaO19.8659; CaO19.1057; CAALFM_C104220CA	Q59VN7	Uncharacterized protein OS=Candida albicans (strain SC5314 / ATCC MYA-2876) OX=237561 GN=orf19.1057 PE=4 SV=1	32	239	0.645503	122	3	3	0		189	20.4	5.17	794	8962.44	77.79	0	19.11				Pf02464	3644721	W5Q_00411; I503_00414		-10.0097	-1.21982	43.1827	5.26244	-3.32332	-0.286673	5.43238	2.39573	0.0999034	0.819791	43.1827	5.26244	0.0578834	1	2.07417e-05	0.0196993	0.0961826	0.454937	5.63383e-05	0.0235971	3.10304e+06	310004	1.63295e+07	1.33868e+07
LIP4	Q9P8W1	Lipase 4 OS=Candida albicans (strain SC5314 / ATCC MYA-2876) OX=237561 GN=LIP4 PE=3 SV=2	32	192	0.827887	380	15	14	1		459	49.5	6.18	2548	33233.1	262.73	0	112.908	metabolic process	extracellular	catalytic activity	Pf03583	3645987			-44.3952	-4.50457	2.28845	-4.30666	-5.47233	-2.17139	1.19437	-2.10657	0.022525	0.221997	2.28845	0.232199	0.0579361	0.142054	0.332474	0.239082	0.158523	0.154227	0.198549	0.251821	1.81454e+08	4.08725e+06	4.21334e+07	9.35348e+06
CaO19.7345; CAALFM_CR09500CA	A0A1D8PTZ9	Putative ATP-dependent kinase OS=Candida albicans (strain SC5314 / ATCC MYA-2876) OX=237561 GN=CAALFM_CR09500CA PE=4 SV=1	5	894	0.0359281	12	1	1	0		334	39	5.17	34	337.78	0	0.01	3.268	metabolic process		catalytic activity	Pf13207	3641897	W5Q_06397; I503_06343	Biosynthesis of antibiotics; Biosynthesis of secondary metabolites; Carbon metabolism; Glycine, serine and threonine metabolism; Metabolic pathways; Glyoxylate and dicarboxylate metabolism; Glycerolipid metabolism	-21.661	1.17023	57.1212	2.25345	-4.43703	0.226795	5.83595	1.17213	0.046166	1.17023	57.1212	2.25345	0.0579631	1	0.00332484	0.470451	0.128592	0.727075	0.00970182	0.275716	216445	9992.41	487748	570778
SGN12; CAALFM_C700250CA; CaJ7_0033	A0A1D8PQJ1	Uncharacterized protein OS=Candida albicans (strain SC5314 / ATCC MYA-2876) OX=237561 GN=orf19.7097 PE=4 SV=1	43	250	0.604278	113	6	6	0		187	20.5	9.6	1027	9676.32	64.21	0	34.816	response to stimulus		RNA binding	Pf00076, Pf13893, Pf14259	3637979	W5Q_05080; I503_05036	mRNA surveillance pathway	-3.70093	-2.26805	10.9151	6.6891	-1.88789	-1.18145	3.44825	2.74181	0.270202	0.440908	10.9151	6.6891	0.0590671	0.274414	0.0171468	0.0364153	0.0557561	0.162103	0.0295633	0.0499219	8.48033e+06	2.2914e+06	5.67258e+07	2.50109e+07
SOU1	P87219	Sorbose reductase SOU1 OS=Candida albicans (strain SC5314 / ATCC MYA-2876) OX=237561 GN=SOU1 PE=1 SV=1	9	391	0.323843	91	2	2	0		281	30	5.3	577	6465.8	39.89	0	8.665	metabolic process		catalytic activity	Pf00106, Pf08659, Pf13561	3642799	W5Q_03927; I503_03952	Fructose and mannose metabolism	-4.91279	1.19618	11.0876	1.88675	-2.29654	0.258432	3.47088	0.9159	0.20355	1.19618	11.0876	1.88675	0.0591496	1	0.00257276	0.311626	0.0679198	0.508667	0.00446487	0.142709	1.39622e+06	284201	2.63431e+06	3.15111e+06
IPP1	P83777	Inorganic pyrophosphatase OS=Candida albicans (strain SC5314 / ATCC MYA-2876) OX=237561 GN=IPP1 PE=1 SV=3	51	66	2.29861	662	11	11	0		288	32.1	5.26	6668	43603.1	197.09	0	80.876	metabolic process	cytoplasm	catalytic activity;metal ion binding	Pf00719	3643874	W5Q_02300	Oxidative phosphorylation	-2.58497	-1.16415	8.11031	3.65252	-1.37014	-0.21928	3.01976	1.86889	0.386852	0.858994	8.11031	3.65252	0.0593855	1	0.00341481	0.270462	0.0406834	0.812869	0.00515595	0.252732	6.44337e+07	2.49263e+07	2.35345e+08	2.0216e+08
SBP1	Q5ANP6	Sbp1p OS=Candida albicans (strain SC5314 / ATCC MYA-2876) OX=237561 GN=SBP1 PE=4 SV=1	31	172	0.957447	270	9	9	0		282	31.9	8.73	2013	15871.5	63.26	0	30.91			RNA binding	Pf00076, Pf13893, Pf14259	3635280	W5Q_02920; I503_02914		-2.64601	-2.54447	1.06631	1.02539	-1.40382	-1.34736	0.0926211	0.0361685	0.377928	0.39301	1.06631	1.02539	0.0595777	0.421268	1	1	0.0418181	0.2838	0.890868	0.963252	2.60141e+07	9.83147e+06	2.66745e+07	1.04833e+07
RRS1	A0A1D8PCC8	Ribosome biogenesis regulatory protein OS=Candida albicans (strain SC5314 / ATCC MYA-2876) OX=237561 GN=RRS1 PE=3 SV=1	30	393	0.321951	66	3	3	0		205	23.4	9.16	744	5718.71	38.41	0	18.852	response to stimulus	nucleus		Pf04939	3639352			-23.7313	-1.04261	118.918	5.22452	-4.56872	-0.0601933	6.89383	2.3853	0.0421384	0.959136	118.918	5.22452	0.0597748	1	0.0146675	0.15312	0.136547	0.949017	0.0505577	0.182618	1.3864e+06	58420.7	7.24328e+06	6.94729e+06
AAT1	A0A1D8PHC9	Aspartate transaminase OS=Candida albicans (strain SC5314 / ATCC MYA-2876) OX=237561 GN=AAT1 PE=4 SV=1	33	404	0.308924	135	9	9	0		437	48.9	8.51	463	7505.2	24.49	0	36.184	metabolic process		catalytic activity	Pf00155	3643468	I503_01970	Arginine and proline metabolism; 2-Oxocarboxylic acid metabolism; Tyrosine metabolism; Phenylalanine, tyrosine and tryptophan biosynthesis; Cysteine and methionine metabolism; Phenylalanine metabolism; Alanine, aspartate and glutamate metabolism; Carbon metabolism; Biosynthesis of amino acids; Metabolic pathways; Biosynthesis of secondary metabolites; Biosynthesis of antibiotics; Arginine biosynt…	-5.23427	-3.29956	16.0088	10.0916	-2.38799	-1.72227	4.00079	3.33508	0.191048	0.30307	16.0088	10.0916	0.0598363	0.164202	0.00845037	0.0446671	0.0714442	0.141401	0.0169041	0.0744841	1.39605e+06	266712	1.40883e+07	4.26974e+06
MDH2; MDH1	P83778	Malate dehydrogenase, cytoplasmic OS=Candida albicans (strain SC5314 / ATCC MYA-2876) OX=237561 GN=MDH1 PE=1 SV=2	68	23	4.86053	1638	14	14	0		337	36	5.62	18683	129723	933.03	0	140.992	metabolic process	cytoplasm;mitochondrion	catalytic activity	Pf00056, Pf01073, Pf02866	3639667	W5Q_05517; I503_05481	Cysteine and methionine metabolism; Glyoxylate and dicarboxylate metabolism; Biosynthesis of antibiotics; Citrate cycle (TCA cycle); Carbon metabolism; Pyruvate metabolism; Biosynthesis of secondary metabolites; Metabolic pathways	-7.41982	1.35133	121.583	12.126	-2.89138	0.434381	6.9258	3.60003	0.134774	1.35133	121.583	12.126	0.060626	1	0.0153935	0.0213398	0.0876464	0.576028	0.0533062	0.038412	1.35847e+08	1.83087e+07	1.64729e+09	2.22603e+09
SGA1	Q5AJ73	Glucan 1,4-alpha-glucosidase OS=Candida albicans (strain SC5314 / ATCC MYA-2876) OX=237561 GN=SGA1 PE=4 SV=1	9	919	0.0319149	18	2	2	0		564	65	5.31	154	1486.88	16.19	0	11.317	metabolic process		catalytic activity	Pf00723	3636652	W5Q_02622; I503_02628	Starch and sucrose metabolism; Metabolic pathways	-497.772	-1.27212	130.237	-3.00447	-8.95934	-0.347236	7.02499	-1.58711	0.00200895	0.786089	130.237	0.332837	0.060743	1	0.0140154	0.567643	0.272109	0.708059	0.0492291	0.450457	827531	1662.47	275433	216515
CAALFM_C203880CA	A0A1D8PH20	Small nuclear ribonucleoprotein G OS=Candida albicans (strain SC5314 / ATCC MYA-2876) OX=237561 GN=orf19.836.1 PE=3 SV=1	12	640	0.121622	9	1	1	0		74	8.1	5.36	119	682.62	3.49	0	6.646	cell organization and biogenesis	spliceosomal complex		Pf01423	30515108	W5Q_01820; I503_01836		-4.20413	-173.025	-1.19784	34.3585	-2.07181	-7.43483	-0.260431	5.1026	0.237862	0.00577952	0.834838	34.3585	0.0608908	0.0993921	1	0.14882	0.063077	0.369482	0.854428	0.379683	45327.2	10781.6	1.55738e+06	9000.9
CaO19.4349; CAALFM_C503170CA	A0A1D8PNL5	Uncharacterized protein OS=Candida albicans (strain SC5314 / ATCC MYA-2876) OX=237561 GN=orf19.4349 PE=4 SV=1	7	996	0.0184049	15	5	5	0		815	90.8	6.92	118	817.44	1.89	0	15.649					3637801			-9.67512	-75.576	7.43295	58.0615	-3.27428	-6.23986	2.89394	5.85951	0.103358	0.0132317	7.43295	58.0615	0.0610939	0.121484	0.286126	0.129955	0.100019	0.37902	0.414014	0.380737	84425.8	8726.07	4.90189e+06	64860.4
TRS23; CAALFM_C102160WA	Q59VY5	TRAPP subunit OS=Candida albicans (strain SC5314 / ATCC MYA-2876) OX=237561 GN=orf19.3673 PE=4 SV=1	23	348	0.380952	64	2	2	0		168	18.4	7.56	345	3977.65	14.26	0	15.629	transport			Pf04099, Pf04628	3644584	W5Q_00204; I503_00206		-114.384	-1.0463	961.615	8.79616	-6.83774	-0.0652931	9.90932	3.13687	0.00874251	0.955751	961.615	8.79616	0.0612205	1	6.52766e-05	0.011914	0.209305	0.85934	0.000323423	0.0186863	1.04955e+06	9175.67	9.23197e+06	8.82347e+06
CaO19.9626; CaO19.2079; PHHB	Q5ACY8	4a-hydroxytetrahydrobiopterin dehydratase OS=Candida albicans (strain SC5314 / ATCC MYA-2876) OX=237561 GN=PHHB PE=4 SV=1	65	65	2.34211	267	7	7	0		114	13.2	6.73	2334	18249.7	125.42	0	40.683	cell communication;metabolic process;response to stimulus		catalytic activity	Pf01329	3638871	W5Q_01494; I503_01487		-73.8421	1.37457	1392.94	13.7235	-6.20637	0.458976	10.4439	3.77857	0.0135424	1.37457	1392.94	13.7235	0.0618288	1	0.00665919	0.046234	0.191866	0.565419	0.034774	0.0873492	7.7348e+06	104748	1.06148e+08	1.45908e+08
LIP8	Q9P8V9	Lipase 8 OS=Candida albicans (strain SC5314 / ATCC MYA-2876) OX=237561 GN=LIP8 PE=3 SV=3	5	757	0.0717391	33	2	1	0		460	49.7	5.49	219	1660.56	1.79	0	8.179	metabolic process	extracellular	catalytic activity	Pf03583, Pf08270	3646727			-12.7098	-15.2385	-1.67736	-1.39901	-3.66787	-3.92965	-0.74619	-0.484406	0.0786795	0.0656231	0.596176	0.714791	0.0621995	0.205241	1	1	0.11407	0.403263	0.680235	0.752909	2.85541e+06	224663	2.04103e+06	133938
SAP5	P43094	Candidapepsin-5 OS=Candida albicans (strain SC5314 / ATCC MYA-2876) OX=237561 GN=SAP5 PE=1 SV=1	75	16	6.05742	2532	33	32	1		418	45.6	6.38	28841	235053	1957.78	0	351.959	metabolic process	extracellular	catalytic activity	Pf00026, Pf14543	3639268	W5Q_04877; I503_04860		-7.94091	-2.53253	1.32804	-2.36104	-2.9893	-1.34058	0.4093	-1.23942	0.12593	0.394862	1.32804	0.423542	0.0624051	0.612934	1	0.484974	0.093274	0.410844	0.319472	0.300544	1.75265e+09	2.20711e+08	7.42318e+08	2.93113e+08
PLB3; PLB4.5	A0A1D8PGF0	Lysophospholipase OS=Candida albicans (strain SC5314 / ATCC MYA-2876) OX=237561 GN=PLB4.5 PE=3 SV=1	21	252	0.602564	423	11	11	0		702	77	5.29	4097	34826.1	242.53	0	67.983	metabolic process	cell surface;extracellular	catalytic activity	Pf01735	3635724			-6.52419	-2.72188	1.68342	-1.42386	-2.7058	-1.44461	0.751393	-0.509802	0.153276	0.367393	1.68342	0.702319	0.0626146	0.337619	0.587243	1	0.0847113	0.243863	0.220625	0.575069	8.62355e+07	1.32178e+07	6.05648e+07	2.22511e+07
GAL7	A0A1D8PCM2	Galactose-1-phosphate uridylyltransferase OS=Candida albicans (strain SC5314 / ATCC MYA-2876) OX=237561 GN=GAL7 PE=3 SV=1	4	1047	0.0103627	4	1	1	0	Acetyl [N-Term]	386	44.7	6.87	23	325.46		0.01	3.31	metabolic process		catalytic activity;metal ion binding	Pf01087, Pf02744	3644591		Metabolic pathways; Galactose metabolism; Amino sugar and nucleotide sugar metabolism	-203.282	2.28415	158.63	-2.92709	-7.66734	1.19166	7.30952	-1.54947	0.00491928	2.28415	158.63	0.341636	0.0627646	0.144062	0.000153085	0.550245	0.240619	0.0858361	0.00055949	0.426293	337949	1662.47	115456	263718
CaO19.3505; SLM2	A0A1D8PPT0	Phosphatidylinositol 4,5-bisphosphate-binding protein OS=Candida albicans (strain SC5314 / ATCC MYA-2876) OX=237561 GN=SLM2 PE=4 SV=1	4	970	0.0225564	18	2	2	0		798	90.2	8.91	46	1098.98	0	0	6.866	cell organization and biogenesis;regulation of biological process;response to stimulus;transport			Pf00169	3647559	W5Q_04785; I503_04768		-12.739	-13.051	32.3057	33.097	-3.67118	-3.70609	5.01372	5.04863	0.0784994	0.0766225	32.3057	33.097	0.0629787	0.205902	0.0789121	0.142605	0.115603	0.381545	0.197821	0.35998	306297	24044.1	1.01375e+07	776762
LSM5; CAALFM_C114410WA	A0A1D8PFX4	RNA-binding protein OS=Candida albicans (strain SC5314 / ATCC MYA-2876) OX=237561 GN=orf19.7256 PE=4 SV=1	56	37	3.74026	288	3	3	0	Acetyl [N-Term]	77	8.4	4.75	3779	25439.4	151.71	0	43.499				Pf01423	3643293		Spliceosome; RNA degradation	-23.469	-1.6154	45.0781	3.10278	-4.55268	-0.691888	5.49436	1.63356	0.0426094	0.619043	45.0781	3.10278	0.0632814	1	0.000318799	0.230824	0.14405	0.393311	0.000875797	0.188533	1.29041e+07	549838	4.00387e+07	2.47857e+07
PBP1; CAALFM_C300130CA	Q5A7K7	Uncharacterized protein OS=Candida albicans (strain SC5314 / ATCC MYA-2876) OX=237561 GN=orf19.5459 PE=4 SV=1	12	816	0.0552381	29	3	3	0		525	59.4	8.68	93	1492.53	4.35	0	11.838				Pf06741, Pf14438	3640593	W5Q_02508; I503_02515		-9.62263	-2.63405	131.883	36.101	-3.26643	-1.39728	7.04311	5.17397	0.103922	0.379643	131.883	36.101	0.0633358	0.591528	0.0153034	0.0842466	0.103441	0.413266	0.0538917	0.217944	51525.8	5354.65	1.86013e+06	706186
MED7	Q5AEN6	Mediator of RNA polymerase II transcription subunit 7 OS=Candida albicans (strain SC5314 / ATCC MYA-2876) OX=237561 GN=MED7 PE=3 SV=1	5	633	0.125	38	1	1	0		304	34.5	4.84	164	2309.21	6.33	0.007	3.614	metabolic process;regulation of biological process	nucleus		Pf05983	3638344			-26.1071	-1.51867	45.3152	2.63601	-4.70637	-0.602805	5.50192	1.39836	0.0383038	0.658472	45.3152	2.63601	0.0646353	1	0.0111884	0.374442	0.152099	0.508831	0.0307788	0.261802	1.04217e+06	39918.9	2.74716e+06	1.80893e+06
KAR2	A0A1D8PG96	Hsp70 family ATPase OS=Candida albicans (strain SC5314 / ATCC MYA-2876) OX=237561 GN=KAR2 PE=3 SV=1	53	117	1.43959	989	27	25	0		687	74.5	4.94	9712	79114.4	517.5	0	176.003	cell organization and biogenesis;metabolic process;transport	cell surface;extracellular	nucleotide binding	Pf00012, Pf06723, Pf08841	3638830		Protein export; Protein processing in endoplasmic reticulum	-7.12595	-9.20082	-1.01928	1.26675	-2.83308	-3.20176	-0.0275455	0.341134	0.140332	0.108686	0.981088	1.26675	0.0648043	0.183874	1	1	0.0917979	0.29436	0.969599	0.805117	1.29204e+08	1.81314e+07	1.63669e+08	1.77885e+07
GDH1; GDH3	A0A1D8PMH8	Glutamate dehydrogenase OS=Candida albicans (strain SC5314 / ATCC MYA-2876) OX=237561 GN=GDH3 PE=3 SV=1	20	439	0.260965	119	6	6	0		456	49.5	5.91	886	11476.5	38.17	0	41.246	metabolic process		catalytic activity	Pf00208, Pf02812	3648086	W5Q_03902; I503_03927	Alanine, aspartate and glutamate metabolism; Nitrogen metabolism; Metabolic pathways; Arginine biosynthesis	3.11037	2.48122	1.88394	2.36164	1.63709	1.31105	0.91375	1.23979	3.11037	2.48122	1.88394	2.36164	0.0648951	0.013408	0.0919434	0.0947861	0.0531194	0.00878926	0.0420066	0.0587573	5.9042e+06	1.83642e+07	1.39436e+07	3.4597e+07
GRE23; GRE2	A0A1D8PHQ6	Gre2p OS=Candida albicans (strain SC5314 / ATCC MYA-2876) OX=237561 GN=GRE2 PE=4 SV=1	12	754	0.0724638	25	2	2	0		345	38	5.38	59	1575.33	2.15	0	10.411	metabolic process;response to stimulus		catalytic activity	Pf01073, Pf01370, Pf07993, Pf13460	3648026	W5Q_02095		-14.1247	1.70789	152.896	6.33806	-3.82015	0.772215	7.2564	2.66404	0.070798	1.70789	152.896	6.33806	0.0650592	0.274036	0.000281161	0.0318396	0.124268	0.105807	0.00102011	0.042411	276706	19590.2	1.75378e+06	2.99526e+06
CHC1	A0A1D8PPS9	Clathrin heavy chain (Fragment) OS=Candida albicans (strain SC5314 / ATCC MYA-2876) OX=237561 GN=CHC1 PE=4 SV=1	10	847	0.0457831	76	12	12	0	Acetyl [N-Term]	1660	188.3	5.2	279	5024.08	8.42	0	45.236	cell organization and biogenesis;transport		protein binding;structural molecule activity	Pf00637, Pf13838	3647552		Endocytosis	-2.30154	-7.33124	2.42114	7.71219	-1.2026	-2.87406	1.27569	2.94714	0.434491	0.136403	2.42114	7.71219	0.0650758	0.12315	0.360283	0.117229	0.0391301	0.17697	0.229804	0.172744	1.0343e+06	449395	7.97674e+06	1.08805e+06
CaO19.4293; CAALFM_C502730CA	Q5AG86	Probable cytosolic iron-sulfur protein assembly protein 1 OS=Candida albicans (strain SC5314 / ATCC MYA-2876) OX=237561 GN=CIA1 PE=3 SV=2	14	817	0.0548303	21	4	4	0		383	42.7	4.88	85	970.6	1.68	0	12.53	cell organization and biogenesis;metabolic process	cytoplasm;nucleus	protein binding	Pf00400	3637738			-4.12429	-3.93649	11.6986	11.1659	-2.04414	-1.97691	3.54827	3.48103	0.242466	0.254033	11.6986	11.1659	0.0656617	0.0834247	0.00422574	0.0271243	0.067111	0.0824615	0.00749704	0.0472104	277570	67301.4	3.09933e+06	787335
CaO19.2008; CAALFM_C201160WA	Q5AD59	Methylthioribose-1-phosphate isomerase OS=Candida albicans (strain SC5314 / ATCC MYA-2876) OX=237561 GN=MRI1 PE=3 SV=2	38	568	0.158654	66	6	6	0		416	46.2	5.41	103	3762.16	21.44	0	22.268	metabolic process	cytoplasm;nucleus	catalytic activity	Pf01008	3638861		Cysteine and methionine metabolism; Metabolic pathways	-10.5449	-1.31557	46.6427	5.81908	-3.39847	-0.395687	5.54358	2.54079	0.0948325	0.760127	46.6427	5.81908	0.0658133	1	0.000196191	0.0326518	0.111832	0.4382	0.000543802	0.0414807	969058	91898.2	5.63903e+06	4.28638e+06
NHP6A	Q9UVL1	Non-histone chromosomal protein 6 OS=Candida albicans (strain SC5314 / ATCC MYA-2876) OX=237561 GN=NHP6 PE=3 SV=1	43	196	0.815217	75	4	4	0		92	10.5	9.7	642	5055.85	18.56	0	16.03	metabolic process;regulation of biological process;response to stimulus	chromosome;nucleus	DNA binding	Pf00505, Pf09011	30515244	W5Q_03464; I503_03464		-7.99647	-1.80545	73.2497	16.5384	-2.99936	-0.852358	6.19475	4.04774	0.125055	0.553879	73.2497	16.5384	0.066386	1	0.00382697	0.107635	0.0995578	0.532975	0.0118536	0.21784	1.48024e+06	185111	2.44807e+07	1.35593e+07
CaO19.14171; CaO19.6882; OSM1	Q59T35	Osm1p OS=Candida albicans (strain SC5314 / ATCC MYA-2876) OX=237561 GN=OSM1 PE=4 SV=1	45	158	1.06958	538	17	17	0		503	54.3	7.87	3797	43187	281.92	0	115.818	metabolic process		catalytic activity;nucleotide binding	Pf00890, Pf01134, Pf01266, Pf01494, Pf01593, Pf01946, Pf03486, Pf07992, Pf12831, Pf13450	3645573	W5Q_01998; I503_02012		-13.7945	-2.7098	19.9407	3.91716	-3.78602	-1.43819	4.31764	1.96981	0.0724929	0.369031	19.9407	3.91716	0.0665506	0.0674978	0.0147134	0.0331833	0.125981	0.0485372	0.0317636	0.0326824	3.3534e+07	2.43098e+06	1.31358e+08	4.84753e+07
YOS9; CAALFM_CR10020CA	Q5ACR4	Protein OS-9 homolog OS=Candida albicans (strain SC5314 / ATCC MYA-2876) OX=237561 GN=YOS9 PE=3 SV=1	10	474	0.224806	58	2	2	0		258	29.4	5.87	661	4681.05	41.8	0	12.736	metabolic process;transport	endoplasmic reticulum;membrane;organelle lumen		Pf07915	3639032	W5Q_06447; I503_06393	Protein processing in endoplasmic reticulum	-2.95732	-1.88513	-2.26565	-3.55426	-1.56429	-0.914664	-1.17992	-1.82955	0.338144	0.530467	0.441375	0.281353	0.067061	0.999917	0.239594	0.062771	0.0524514	0.457294	0.141351	0.0574213	9.67095e+06	3.27018e+06	2.72095e+06	1.44337e+06
SCD6; CAALFM_C106600WA	Q5AAR2	Uncharacterized protein OS=Candida albicans (strain SC5314 / ATCC MYA-2876) OX=237561 GN=orf19.6250 PE=4 SV=1	22	131	1.26225	438	6	6	0	Acetyl [N-Term]	347	37.8	7.34	4323	42776.3	289.21	0	56.412				Pf09532, Pf12701	3639513	W5Q_00640; I503_00644		-2.72378	-2.75067	4.25721	4.29923	-1.44561	-1.45978	2.08991	2.10408	0.367137	0.363548	4.25721	4.29923	0.0671018	0.192438	0.00121823	0.0882737	0.0485015	0.140459	0.001273	0.0928675	2.45974e+07	9.03064e+06	1.0575e+08	3.84453e+07
MAM33; CaJ7_0451	A0A1D8PRG4	Mam33p OS=Candida albicans (strain SC5314 / ATCC MYA-2876) OX=237561 GN=MAM33 PE=4 SV=1	61	130	1.27273	336	10	10	0		264	29.9	4.63	3290	32323.8	285.79	0	81.718		organelle lumen		Pf02330	3643103	W5Q_05422; I503_05385		-6.4834	-3.83543	14.9273	8.83067	-2.69675	-1.93939	3.89989	3.14252	0.15424	0.260727	14.9273	8.83067	0.0674221	0.199788	0.000440257	0.0861339	0.0909102	0.193733	0.000858475	0.135339	1.08697e+07	1.67654e+06	9.59866e+07	2.50263e+07
ECM17	A0A1D8PHL8	Sulfite reductase (NADPH) subunit beta OS=Candida albicans (strain SC5314 / ATCC MYA-2876) OX=237561 GN=ECM17 PE=4 SV=1	1	1029	0.013222	19	1	1	0		1437	160	5.49	127	1179.82	5.22	0.003	4.194	metabolic process		catalytic activity;nucleotide binding	Pf00258, Pf01077, Pf03460	3644077	W5Q_02044; I503_02058	Metabolic pathways; Sulfur metabolism	3.45643	3.41331	-3.56168	-3.51725	1.78928	1.77117	-1.83256	-1.81445	3.45643	3.41331	0.280766	0.284313	0.067436	0.392847	0.0456661	0.451079	0.060331	0.3479	0.0418429	0.40923	395080	1.36557e+06	112326	383405
CaJ7_0022; RPE1; CAALFM_C700150WA	A0A1D8PQI4	Ribulose-phosphate 3-epimerase OS=Candida albicans (strain SC5314 / ATCC MYA-2876) OX=237561 GN=orf19.7108 PE=3 SV=1	58	132	1.25217	288	9	9	0		230	25.3	5.36	1337	20364.6	121.48	0	85.751	metabolic process		catalytic activity;metal ion binding	Pf00834	3637973	W5Q_05070; I503_05026	Biosynthesis of secondary metabolites; Biosynthesis of antibiotics; Metabolic pathways; Pentose and glucuronate interconversions; Biosynthesis of amino acids; Carbon metabolism; Pentose phosphate pathway	-2.74944	-1.31432	16.6445	7.95662	-1.45914	-0.394321	4.05697	2.99216	0.36371	0.760848	16.6445	7.95662	0.0677812	1	0.0039832	0.0654615	0.0494511	0.608615	0.00807987	0.0979355	3.66866e+06	1.33433e+06	2.91901e+07	2.22092e+07
ERG13	A0A1D8PTW6	3-hydroxy-3-methylglutaryl coenzyme A synthase OS=Candida albicans (strain SC5314 / ATCC MYA-2876) OX=237561 GN=ERG13 PE=3 SV=1	19	687	0.101996	46	4	4	0		451	49.7	5.97	194	2544.25	0	0	15.421	cell communication;metabolic process;response to stimulus		catalytic activity	Pf01154, Pf08540	3641881	W5Q_06367; I503_06313	Terpenoid backbone biosynthesis; Metabolic pathways; Butanoate metabolism; Valine, leucine and isoleucine degradation; Biosynthesis of antibiotics; Biosynthesis of secondary metabolites; Synthesis and degradation of ketone bodies	-1.52776	-1.96484	1.5882	2.04257	-0.611419	-0.974414	0.66739	1.03039	0.654553	0.508946	1.5882	2.04257	0.0679169	0.7421	0.608878	0.644685	0.0207628	0.361556	0.20318	0.332137	809294	529726	1.65304e+06	841309
SER1	Q59P52	Phosphoserine aminotransferase OS=Candida albicans (strain SC5314 / ATCC MYA-2876) OX=237561 GN=SER1 PE=3 SV=1	34	253	0.596939	234	8	8	0		392	43	6.34	1538	16341.8	92.09	0	41.433	metabolic process		catalytic activity	Pf00266	3646909	W5Q_02048; I503_02062	Metabolic pathways; Biosynthesis of antibiotics; Methane metabolism; Biosynthesis of amino acids; Carbon metabolism; Glycine, serine and threonine metabolism; Vitamin B6 metabolism	-6.89438	-1.69984	15.7914	3.89343	-2.78542	-0.765397	3.98106	1.96104	0.145046	0.588292	15.7914	3.89343	0.0680135	0.204416	0.0122037	0.00444569	0.0947232	0.0782297	0.0242919	0.00435909	6.28559e+06	911698	2.44725e+07	1.4397e+07
CaO19.2414; CAALFM_CR03120WA	A0A1D8PSE0	Uncharacterized protein OS=Candida albicans (strain SC5314 / ATCC MYA-2876) OX=237561 GN=CAALFM_CR03120WA PE=4 SV=1	11	792	0.0621118	20	2	2	0		322	37.1	5.67	77	748.34	0	0	7.799					3645123	W5Q_05756		-13.2576	-1.33185	17.1542	1.72329	-3.72875	-0.41343	4.10049	0.785169	0.0754284	0.750836	17.1542	1.72329	0.0681322	1	0.00150512	1	0.127024	0.704256	0.00308586	0.560788	719296	54255.4	1.23956e+06	930706
SMX4	A0A1D8PTG5	U6 snRNA-associated Sm-like protein LSm3 OS=Candida albicans (strain SC5314 / ATCC MYA-2876) OX=237561 GN=SMX4 PE=3 SV=1	36	214	0.75	72	3	3	0	Acetyl [N-Term]	96	10.9	4.51	330	4067.8	15.17	0	11.43	metabolic process		RNA binding	Pf01423	30515427	W5Q_06183; I503_06141		-3.59576	-2.30502	7.95917	5.10213	-1.8463	-1.20478	2.99262	2.3511	0.278105	0.433836	7.95917	5.10213	0.0681595	0.586129	0.00391037	0.177835	0.0629213	0.353078	0.00585113	0.209054	4.26303e+06	1.18557e+06	2.17505e+07	9.43616e+06
MVD1; MVD	A0A1D8PC43	Diphosphomevalonate decarboxylase OS=Candida albicans (strain SC5314 / ATCC MYA-2876) OX=237561 GN=MVD PE=3 SV=1	46	295	0.486188	176	12	12	0		362	39.5	6.46	1686	13262.5	76.88	0	57.79	metabolic process	cytosol	catalytic activity;nucleotide binding		3639306	W5Q_00005		-2.65082	-4.48596	3.12579	5.28974	-1.40644	-2.16542	1.64422	2.4032	0.377242	0.222918	3.12579	5.28974	0.0686183	0.223665	0.00955044	0.188185	0.0482537	0.242164	0.00785152	0.226123	4.51974e+06	1.70503e+06	2.39082e+07	5.32957e+06
POX181; CAALFM_C301420CA	Q5AJ84	Uncharacterized protein OS=Candida albicans (strain SC5314 / ATCC MYA-2876) OX=237561 GN=orf19.1709 PE=4 SV=1	58	48	3.18898	405	10	10	0	Acetyl [N-Term]	127	13.8	9.58	5188	34652.5	134.98	0	45.483				Pf02036	3636634	W5Q_02631; I503_02637		-37.8425	-2.4694	39.73	2.59257	-5.24194	-1.30416	5.31216	1.37438	0.0264253	0.404957	39.73	2.59257	0.0686809	0.568843	9.92121e-05	0.563653	0.18001	0.370931	0.000263515	0.387337	5.69998e+07	1.50624e+06	1.47776e+08	5.98428e+07
CaO19.590; CAALFM_CR08050CA; CaO19.8222	Q59X88	Uncharacterized protein OS=Candida albicans (strain SC5314 / ATCC MYA-2876) OX=237561 GN=CAALFM_CR08050CA PE=1 SV=1	77	183	0.856187	256	13	13	0		299	33.6	5.31	1523	18007.3	117.74	0	93.781			metal ion binding	Pf09084, Pf13379	3644133	W5Q_06256		-4.03498	-1.92439	21.381	10.1972	-2.01256	-0.944404	4.41826	3.3501	0.247833	0.519644	21.381	10.1972	0.0701764	0.48392	0.0154994	0.0239555	0.0706172	0.228508	0.0342402	0.0401266	9.2406e+06	2.29012e+06	9.42284e+07	4.89652e+07
SMT3	Q59W54	SUMO family protein OS=Candida albicans (strain SC5314 / ATCC MYA-2876) OX=237561 GN=SMT3 PE=4 SV=1	48	323	0.421569	43	4	4	0		102	11.1	5.52	260	1987.66	5.48	0	16.936	metabolic process;response to stimulus	cytoskeleton	protein binding	Pf00240, Pf11976	3644550	W5Q_01096; I503_01106	RNA transport	-9.05846	-6.10679	7.84495	5.2887	-3.17927	-2.61041	2.97176	2.40291	0.110394	0.163752	7.84495	5.2887	0.070224	0.342842	0.169071	0.382357	0.11163	0.447479	0.251219	0.459386	2.93725e+06	324255	1.55342e+07	2.54377e+06
AHP13; AHP2	A0A1D8PR39	Peroxiredoxin OS=Candida albicans (strain SC5314 / ATCC MYA-2876) OX=237561 GN=AHP2 PE=3 SV=1	63	82	1.90811	353	13	13	0		185	20	7.27	2159	27029.1	189.49	0	77.362	metabolic process		antioxidant activity;catalytic activity	Pf00578, Pf08534	3636977	W5Q_05282	Sulfur relay system	-5.44616	-1.10378	153.711	31.1526	-2.44524	-0.142447	7.26407	4.96128	0.183616	0.905981	153.711	31.1526	0.0703613	1	0.0138194	0.00221554	0.0860251	0.811845	0.0501925	0.00549595	7.27992e+06	1.33671e+06	2.26789e+08	2.05466e+08
CaO19.1510; SRD1	A0A1D8PGG7	Srd1p OS=Candida albicans (strain SC5314 / ATCC MYA-2876) OX=237561 GN=SRD1 PE=4 SV=1	3	1055	0.0096	6	2	2	0		625	67.4	5.95	45	244.61	0	0.002	4.766		membrane		Pf06687	3635764			-6.40286	-79.3706	2.99811	37.165	-2.67872	-6.31053	1.58406	5.21587	0.15618	0.0125991	2.99811	37.165	0.0706826	0.119976	0.637122	0.147555	0.0946694	0.378555	0.504618	0.384815	30080.6	4697.99	1.11794e+06	14085.1
CaJ7_0406; CaO19.6688; CAALFM_C703560WA; CaO19.13980	Q59R32	Virulence factor CaO19.6688 OS=Candida albicans (strain SC5314 / ATCC MYA-2876) OX=237561 GN=CAALFM_C703560WA PE=2 SV=1	5	651	0.116564	38	2	2	0		326	35.9	6.39	196	2349.21	11.52	0	8.358					3646236	W5Q_05386; I503_05349		-291.503	1.00949	2529.46	8.59572	-8.18737	0.013631	11.3046	3.10362	0.0034305	1.00949	2529.46	8.59572	0.0708683	1	0.0136243	0.112986	0.290112	0.989516	0.0770089	0.175333	484615	1662.47	4.16561e+06	4.20516e+06
RAD23	A0A1D8PGE3	Rad23p OS=Candida albicans (strain SC5314 / ATCC MYA-2876) OX=237561 GN=RAD23 PE=4 SV=1	14	364	0.360577	150	4	4	0		416	43.7	4.44	1361	15442.1	124.21	0	33.051	metabolic process;response to stimulus	nucleus	DNA binding;protein binding	Pf00240, Pf00627, Pf09280, Pf11976	3635834			-3.73849	-1.82468	17.4203	8.50249	-1.90245	-0.867642	4.1227	3.08789	0.267488	0.548042	17.4203	8.50249	0.0712966	0.731665	0.00108664	0.0561676	0.0678192	0.317412	0.00223995	0.0867196	3.4479e+06	922272	2.93158e+07	1.60663e+07
ALD99; ALD5	A0A1D8PGT5	Aldehyde dehydrogenase (NAD(P)(+)) OS=Candida albicans (strain SC5314 / ATCC MYA-2876) OX=237561 GN=ALD5 PE=3 SV=1	64	108	1.55912	778	20	20	0		499	54	5.67	4617	57368.7	331.22	0	168.743	metabolic process		catalytic activity	Pf00171	3643026	W5Q_01733; I503_01742	Biosynthesis of secondary metabolites; Metabolic pathways; Pyruvate metabolism; Arginine and proline metabolism; Glycolysis / Gluconeogenesis; Histidine metabolism; Biosynthesis of antibiotics; Lysine degradation; Fatty acid degradation; Tryptophan metabolism; Pentose and glucuronate interconversions; beta-Alanine metabolism; Valine, leucine and isoleucine degradation; Ascorbate and aldarate meta…	-14.4434	-2.19136	24.7787	3.75942	-3.85234	-1.13183	4.63103	1.91051	0.0692356	0.456337	24.7787	3.75942	0.0720604	0.0988867	0.00152811	0.0363231	0.138801	0.0559614	0.00353836	0.0346978	7.43883e+07	5.15031e+06	2.79657e+08	1.27618e+08
LDG8; CAALFM_C602100WA	A0A1D8PPT3	Uncharacterized protein OS=Candida albicans (strain SC5314 / ATCC MYA-2876) OX=237561 GN=orf19.3499 PE=4 SV=1	82	3	16.6826	2786	14	14	0		167	18.3	5	16578	218659	1477.28	0	133.821					3647554			-3.76429	-2.66535	2.52701	1.78928	-1.91238	-1.41433	1.33743	0.839381	0.265654	0.375185	2.52701	1.78928	0.0730591	0.291904	0.0484389	0.891844	0.0698583	0.206424	0.0323919	0.374298	2.51854e+09	6.69063e+08	4.50639e+09	1.69073e+09
CaO19.1032; SKO1	Q59VR1	Transcriptional regulator SKO1 OS=Candida albicans (strain SC5314 / ATCC MYA-2876) OX=237561 GN=SKO1 PE=1 SV=2	9	680	0.103806	60	4	4	0		578	62	8.81	446	3716.77	20.49	0	14.881	metabolic process;regulation of biological process;response to stimulus	nucleus	DNA binding	Pf00170, Pf07716	3644688			-2.18171	-2.39653	4.54465	4.99213	-1.12546	-1.26094	2.18417	2.31966	0.458357	0.417271	4.54465	4.99213	0.0735894	0.621927	0.0106054	0.221154	0.0414109	0.392108	0.011582	0.256501	1.09229e+06	500658	5.45285e+06	2.27531e+06
HOM6	Q5AIA2	Homoserine dehydrogenase OS=Candida albicans (strain SC5314 / ATCC MYA-2876) OX=237561 GN=HOM6 PE=3 SV=1	43	226	0.70195	252	11	11	0		359	38.8	5.31	1555	17855.6	126.23	0	54.473	metabolic process		catalytic activity;nucleotide binding	Pf00742, Pf03447	3636815	W5Q_00252; I503_00251	Glycine, serine and threonine metabolism; Metabolic pathways; Biosynthesis of antibiotics; Lysine biosynthesis; Biosynthesis of secondary metabolites; Cysteine and methionine metabolism; Biosynthesis of amino acids	-2.2196	1.11149	9.00721	3.65099	-1.1503	0.152492	3.17108	1.86829	0.450531	1.11149	9.00721	3.65099	0.0737953	1	0.00140679	0.0270416	0.0424434	0.674904	0.00223052	0.0252608	9.89024e+06	4.45586e+06	3.61092e+07	4.01349e+07
CaO19.6065; CAALFM_C100420WA; CaO19.13486	Q5ABA5	Uncharacterized protein OS=Candida albicans (strain SC5314 / ATCC MYA-2876) OX=237561 GN=orf19.6065 PE=4 SV=1	13	387	0.328173	106	3	3	0		323	37.3	6.19	638	6749.06	23.04	0	15.465				Pf12697	3639286	W5Q_00036; I503_00036		-7.17871	-1.06925	1.64028	-4.09307	-2.84373	-0.0966009	0.71394	-2.03318	0.139301	0.935234	1.64028	0.244315	0.0740475	1	1	0.12748	0.105285	0.836563	0.541589	0.129595	4.52161e+07	6.29864e+06	1.1047e+07	1.03315e+07
HIS6; CAALFM_C405640CA	A0A1D8PMD0	1-(5-phosphoribosyl)-5-[(5-phosphoribosylamino)methylideneamino] imidazole-4-carboxamide isomerase OS=Candida albicans (strain SC5314 / ATCC MYA-2876) OX=237561 GN=CAALFM_C405640CA PE=3 SV=1	10	679	0.103943	29	2	2	0		279	30.8	5.87	61	1245.91	0	0	6.143	metabolic process	cytoplasm	catalytic activity	Pf00977	3641813		Histidine metabolism; Metabolic pathways; Biosynthesis of amino acids; Biosynthesis of secondary metabolites	-3.46147	1.51778	8.4757	1.61327	-1.79138	0.601965	3.08333	0.689984	0.288895	1.51778	8.4757	1.61327	0.074419	1	0.000685567	1	0.0666565	0.378645	0.00105692	0.512421	583857	168673	941916	1.42962e+06
SHM2	O13426	Serine hydroxymethyltransferase, cytosolic OS=Candida albicans (strain SC5314 / ATCC MYA-2876) OX=237561 GN=SHM2 PE=1 SV=4	16	522	0.187234	88	4	4	0		470	52	7.2	698	6651.53	38.28	0	25.756	metabolic process	cytoplasm	catalytic activity	Pf00155, Pf00464	3640306	W5Q_04948; I503_04936	Cyanoamino acid metabolism; Biosynthesis of amino acids; Glyoxylate and dicarboxylate metabolism; Biosynthesis of antibiotics; Glycine, serine and threonine metabolism; Biosynthesis of secondary metabolites; One carbon pool by folate; Metabolic pathways; Carbon metabolism; Methane metabolism	-7.09277	1.23196	13.1964	1.51023	-2.82635	0.30096	3.72207	0.594764	0.140989	1.23196	13.1964	1.51023	0.074654	1	0.000480806	1	0.105499	0.572416	0.000894798	0.492724	5.0025e+06	705296	7.55491e+06	9.30737e+06
DDI1	A0A1D8PFX6	Ddi1p OS=Candida albicans (strain SC5314 / ATCC MYA-2876) OX=237561 GN=DDI1 PE=4 SV=1	24	366	0.359133	116	5	5	0		323	35.9	4.88	865	7079.1	44.45	0	28.576	metabolic process		catalytic activity;protein binding	Pf00240, Pf09668	3643295	W5Q_01393; I503_01425		-4.59352	-7.89456	1.19463	2.05313	-2.1996	-2.98086	0.256563	1.03782	0.217698	0.12667	1.19463	2.05313	0.0755377	0.0295213	1	0.400053	0.0830763	0.0439994	0.601216	0.207592	7.23878e+06	1.57587e+06	1.48621e+07	1.88258e+06
CaO19.9418; CaO19.1862; CAALFM_C207630CA	Q59U89	Uncharacterized protein OS=Candida albicans (strain SC5314 / ATCC MYA-2876) OX=237561 GN=orf19.1862 PE=4 SV=1	58	24	4.8595	588	7	7	0		121	13.1	5.33	3687	41796.5	305.52	0	40.295				Pf01172	3645193	W5Q_02183; I503_02199		-72.3438	2.73528	691.261	3.49333	-6.1768	1.45169	9.43309	1.8046	0.0138229	2.73528	691.261	3.49333	0.0755646	0.00160331	2.78403e-05	0.0356585	0.233374	0.00116375	0.00013131	0.0321747	2.53144e+08	3.49918e+06	8.84316e+08	2.41885e+09
CaO19.4193; CAALFM_C600660CA	A0A1D8PPG2	Uncharacterized protein OS=Candida albicans (strain SC5314 / ATCC MYA-2876) OX=237561 GN=orf19.4193 PE=3 SV=1	71	54	2.94853	401	10	10	0	Acetyl [N-Term]	136	15.7	4.75	2917	33440.8	136.77	0	68.53	regulation of biological process		protein binding	Pf00241	3647133	W5Q_04655; I503_04631		-26.1061	1.35047	203.818	5.78115	-4.70632	0.433461	7.67113	2.53136	0.0383052	1.35047	203.818	5.78115	0.0764829	1	6.9685e-05	0.0263333	0.179976	0.253549	0.000267281	0.0333295	1.9252e+07	737452	1.11299e+08	1.50306e+08
NCP1	A0A1D8PLR7	NADPH--cytochrome P450 reductase OS=Candida albicans (strain SC5314 / ATCC MYA-2876) OX=237561 GN=NCP1 PE=3 SV=1	6	1028	0.0132353	9	3	3	0		680	76.6	5.31	56	585.1	0	0	10.79	metabolic process;response to stimulus	cytoplasm;endoplasmic reticulum;membrane;mitochondrion	catalytic activity;nucleotide binding	Pf00175, Pf00258, Pf00667	3637839			-7.28668	-10.1718	14.9943	20.9312	-2.86526	-3.3465	3.90634	4.38758	0.137237	0.0983112	14.9943	20.9312	0.0765106	0.250554	0.202873	0.179611	0.109611	0.41924	0.396245	0.39403	45358.1	6224.79	949398	93336.5
TAF10; CAALFM_CR01120CA	Q5A886	Transcription initiation factor TFIID subunit 10 OS=Candida albicans (strain SC5314 / ATCC MYA-2876) OX=237561 GN=CAALFM_CR01120CA PE=3 SV=1	28	693	0.0983607	24	3	3	0		244	26.8	4.51	19	664.84	2.08	0	9.959	metabolic process;regulation of biological process	nucleus		Pf03540	3640434	W5Q_05571; I503_05534	Basal transcription factors	-5.09532	1.16937	16.679	2.79928	-2.34917	0.22573	4.05996	1.48506	0.196259	1.16937	16.679	2.79928	0.076549	1	0.00581282	0.295193	0.0899133	0.747522	0.0117999	0.219189	667121	130928	1.86746e+06	2.18375e+06
CCT2	Q59YC4	Chaperonin-containing T-complex subunit OS=Candida albicans (strain SC5314 / ATCC MYA-2876) OX=237561 GN=CCT2 PE=3 SV=1	3	1036	0.0114068	6	1	1	0		526	56.8	5.97	66	526.87	4.7	0	6.337	metabolic process	cytoplasm	nucleotide binding;protein binding	Pf00118	3643815	W5Q_02371; I503_02377		-2.4028	-31.5067	-36.7471	-2.80245	-1.26472	-4.97759	-5.19956	-1.48669	0.416181	0.0317393	0.027213	0.356831	0.0767897	0.0498519	0.0104425	0.0801229	0.0485585	0.124071	0.0271482	0.0595589	1.27495e+06	530609	454940	14439.5
CaJ7_0438; CaO19.7199; CAALFM_C703830CA	A0A1D8PRF3	Uncharacterized protein OS=Candida albicans (strain SC5314 / ATCC MYA-2876) OX=237561 GN=orf19.7199 PE=4 SV=1	8	407	0.303571	51	1	1	0		168	19.1	7.56	663	4565.44	27.28	0	6.112				Pf03928	3643147	W5Q_05412; I503_05375		-14.63	1.08034	43.6311	2.76051	-3.87086	0.111492	5.44728	1.46493	0.0683526	1.08034	43.6311	2.76051	0.0769137	1	0.000169864	0.0616743	0.148861	0.62774	0.000462649	0.0451744	772897	52829.5	2.13359e+06	2.30501e+06
RPS10; RPS1	P40910	40S ribosomal protein S1 OS=Candida albicans (strain SC5314 / ATCC MYA-2876) OX=237561 GN=RPS1 PE=3 SV=3	20	319	0.433594	111	4	4	0		256	29	10.04	425	5853.06	31.32	0	25.401	metabolic process	cytoplasm;ribosome	structural molecule activity	Pf01015	3636924	W5Q_00299; I503_00298	Ribosome	-3.73326	-2.05024	1.8745	1.02944	-1.90044	-1.03579	0.906504	0.0418599	0.267863	0.487748	1.8745	1.02944	0.0777026	0.901002	0.660838	1	0.0738344	0.466625	0.299526	0.968287	1.3785e+07	3.69247e+06	1.41908e+07	6.92153e+06
ARO4	P79023	Phospho-2-dehydro-3-deoxyheptonate aldolase, tyrosine-inhibited OS=Candida albicans (strain SC5314 / ATCC MYA-2876) OX=237561 GN=ARO4 PE=3 SV=1	11	493	0.213514	79	3	3	0		370	40.3	6.65	305	4888.19	29.21	0	12.542	metabolic process		catalytic activity	Pf00793	3647668	W5Q_00499; I503_00502	Biosynthesis of secondary metabolites; Metabolic pathways; Biosynthesis of amino acids; Biosynthesis of antibiotics; Phenylalanine, tyrosine and tryptophan biosynthesis	-3.7215	1.0316	7.51566	1.95766	-1.89589	0.0448804	2.9099	0.969133	0.268709	1.0316	7.51566	1.95766	0.0777711	1	0.00893425	0.452628	0.0737226	0.935099	0.0129989	0.219329	4.87024e+06	1.30867e+06	9.53429e+06	9.83555e+06
IST2	A0A1D8PE41	Ist2p OS=Candida albicans (strain SC5314 / ATCC MYA-2876) OX=237561 GN=IST2 PE=4 SV=1	3	1014	0.0146905	14	2	2	0		953	107	8.27	24	603.76	0	0	7.752		membrane		Pf04547	3646662			-6.19422	-1.71567	5.06487	1.40286	-2.63092	-0.778773	2.34053	0.488376	0.161441	0.582862	5.06487	1.40286	0.0778426	1	0.0275542	1	0.102399	0.471716	0.0322456	0.64591	724377	116944	1.0162e+06	592307
CaO19.6757; GCY1; CaO19.14049	Q5ADT4	Glycerol 2-dehydrogenase (NADP(+)) OS=Candida albicans (strain SC5314 / ATCC MYA-2876) OX=237561 GN=GCY1 PE=4 SV=1	68	59	2.70847	799	15	15	0		295	33	6.58	6419	67802.2	542.7	0	121.843	metabolic process;response to stimulus		catalytic activity	Pf00248, Pf04055	3638477	W5Q_03243; I503_03244	Glycerolipid metabolism; Metabolic pathways	-2.90841	-2.51266	9.43049	8.14726	-1.54023	-1.32921	3.23733	3.02631	0.34383	0.397985	9.43049	8.14726	0.0778685	0.381247	0.024732	0.0760231	0.0599678	0.253379	0.0400328	0.115035	9.5545e+07	3.28513e+07	7.7843e+08	3.09803e+08
NIUP2; CAALFM_C503550WA	A0A1D8PNP6	Nucleoporin OS=Candida albicans (strain SC5314 / ATCC MYA-2876) OX=237561 GN=orf19.6665 PE=4 SV=1	21	618	0.132576	105	11	11	0		792	84.3	5.64	973	6918.73	41.33	0	39.887	transport			Pf00638, Pf08911	3646973	W5Q_04375; I503_04372		-7.78851	-1.42274	79.1586	14.46	-2.96135	-0.508672	6.30667	3.854	0.128394	0.702869	79.1586	14.46	0.0780021	1	0.00539994	0.0143655	0.115496	0.412785	0.0170278	0.0276824	2.7288e+06	350363	3.94585e+07	2.77342e+07
GPM1	P82612	Phosphoglycerate mutase OS=Candida albicans (strain SC5314 / ATCC MYA-2876) OX=237561 GN=GPM1 PE=1 SV=3	81	31	4.31855	1071	15	15	0		248	27.4	6.16	11387	93732.9	697.52	0	131.081	metabolic process	cell surface;cytoplasm	catalytic activity;protein binding	Pf00300	3637431	W5Q_01762; I503_01778	Carbon metabolism; Methane metabolism; Biosynthesis of amino acids; Metabolic pathways; Biosynthesis of antibiotics; Glycine, serine and threonine metabolism; Glycolysis / Gluconeogenesis; Biosynthesis of secondary metabolites	-2.61564	-4.27078	2.513	4.10319	-1.38716	-2.0945	1.32941	2.03675	0.382316	0.234149	2.513	4.10319	0.0780969	0.00497682	0.00572504	0.00670722	0.0541665	0.00521198	0.00380546	0.00683046	1.53047e+08	5.85122e+07	6.27979e+08	1.47041e+08
CaO19.6200; CAALFM_C107040CA	Q5AB49	Probable pathogenesis-related protein CaO19.6200 OS=Candida albicans (strain SC5314 / ATCC MYA-2876) OX=237561 GN=CAALFM_C107040CA PE=2 SV=1	7	785	0.0630915	20	2	2	0		317	34.1	8.37	50	986.03	2.19	0	7.997		extracellular		Pf00188	3639533			-8.36846	4.37911	11.0301	-3.32241	-3.06496	2.13064	3.46337	-1.73223	0.119496	4.37911	11.0301	0.300986	0.0781566	0.00195758	0.000295846	0.22909	0.119774	0.00208545	0.000512312	0.198418	1.81381e+06	216744	545933	2.3907e+06
STI1	A0A1D8PN90	Hsp90 cochaperone OS=Candida albicans (strain SC5314 / ATCC MYA-2876) OX=237561 GN=STI1 PE=4 SV=1	26	170	0.96944	571	13	13	0		589	65.9	5.34	4843	44649.9	205.66	0	75.194			protein binding	Pf00515, Pf07719, Pf13181, Pf13414, Pf13424, Pf13432	3643758			-6.94068	-1.31172	17.7481	3.35421	-2.79508	-0.391461	4.14959	1.74597	0.144078	0.762357	17.7481	3.35421	0.0788865	1	8.69097e-05	0.0312246	0.110247	0.241465	0.00018032	0.0272586	2.6931e+07	3.88016e+06	9.03322e+07	6.88654e+07
CaO19.10743; CaO19.3233; HSE1	Q5A895	Class E vacuolar protein-sorting machinery protein HSE1 OS=Candida albicans (strain SC5314 / ATCC MYA-2876) OX=237561 GN=HSE1 PE=3 SV=1	15	643	0.120482	60	5	5	0		498	56.6	6.76	231	3559.94	17.12	0	19.234	transport	endosome;membrane	protein binding	Pf00018, Pf00790, Pf07653, Pf14604	3640407	W5Q_05580; I503_05543	Endocytosis	-61.2564	-1.25906	1356.1	27.8731	-5.93679	-0.332345	10.4052	4.8008	0.0163248	0.794244	1356.1	27.8731	0.0789392	1	0.00699886	0.00462868	0.234323	0.571517	0.0364124	0.0111107	147751	2412.01	4.11829e+06	3.27093e+06
HYR1	Q5AL03	Hyphally regulated cell wall protein 1 OS=Candida albicans (strain SC5314 / ATCC MYA-2876) OX=237561 GN=HYR1 PE=1 SV=2	8	598	0.142546	131	5	5	0		919	91.9	4.65	946	8624.6	56.34	0	32.832	response to stimulus	cell surface;extracellular;membrane	protein binding	Pf11765	3636226			-8.76238	-26.737	-1.82475	1.6722	-3.13132	-4.74077	-0.867697	0.741745	0.114124	0.0374014	0.548021	1.6722	0.0789567	0.0513159	0.0855366	1	0.123619	0.121638	0.03711	0.513697	1.6375e+07	1.86878e+06	2.73822e+07	1.02413e+06
RIB4	A0A1D8PDK6	6,7-dimethyl-8-ribityllumazine synthase OS=Candida albicans (strain SC5314 / ATCC MYA-2876) OX=237561 GN=RIB4 PE=3 SV=1	36	124	1.3932	287	8	8	0		206	23.1	8.72	1353	17770.7	35.17	0	52.171	metabolic process		catalytic activity	Pf00885	30514995			-5.17119	-1.55999	76.4942	23.0759	-2.3705	-0.641534	6.25728	4.52831	0.193379	0.641031	76.4942	23.0759	0.0798629	1	0.0164634	0.00553256	0.0946574	0.32389	0.0515079	0.0125266	3.42771e+06	662848	7.90975e+07	5.0704e+07
DOG1	A0A1D8PPR2	2-deoxyglucose-6-phosphatase OS=Candida albicans (strain SC5314 / ATCC MYA-2876) OX=237561 GN=DOG1 PE=4 SV=1	60	146	1.13333	272	9	9	0	Acetyl [N-Term]	240	26.2	5.3	1081	14803.6	14.76	0	46.91	metabolic process		catalytic activity	Pf00702, Pf13242, Pf13419	3641597			-6.26609	-1.94037	21.0716	6.52505	-2.64757	-0.956329	4.39723	2.70599	0.159589	0.515366	21.0716	6.52505	0.0800047	0.0564453	0.00603692	0.000880825	0.105909	0.0269902	0.0132729	0.00119175	4.93853e+06	788137	3.22242e+07	1.66073e+07
CaO19.5648; CAALFM_C400230WA	A0A1D8PKZ4	Uncharacterized protein OS=Candida albicans (strain SC5314 / ATCC MYA-2876) OX=237561 GN=orf19.5648 PE=4 SV=1	21	529	0.183168	37	3	3	0		202	23.5	9.25	588	4189.17	30.86	0	12.085					3645034	W5Q_03325; I503_03326		-20.226	-1.22035	84.8529	5.11967	-4.33814	-0.287297	6.40689	2.35605	0.0494414	0.819436	84.8529	5.11967	0.0805887	1	0.000536814	0.12843	0.174802	0.710776	0.00171965	0.151294	579461	28649.3	2.96665e+06	2.43098e+06
CaO19.6139; FRE7	A0A1D8PTG2	Fre7p OS=Candida albicans (strain SC5314 / ATCC MYA-2876) OX=237561 GN=FRE7 PE=4 SV=1	3	901	0.0347395	14	1	1	0		403	46.3	7.66	164	927.32	1.92	0.003	4.232	metabolic process	membrane	catalytic activity	Pf01794, Pf08022, Pf08030	3646024	W5Q_06179; I503_06137		-2.90467	2.78292	3.45549	-2.33931	-1.53838	1.4766	1.78889	-1.22608	0.344273	2.78292	3.45549	0.427476	0.0815521	0.46245	0.331934	0.150026	0.0627289	0.341427	0.296897	0.0919726	880149	303011	376243	1.04705e+06
ACS1	Q59XW4	Acetyl-coenzyme A synthetase OS=Candida albicans (strain SC5314 / ATCC MYA-2876) OX=237561 GN=ACS1 PE=3 SV=1	41	251	0.602963	407	18	17	0		675	75.1	6.32	2644	30032.9	193.06	0	121.806	metabolic process		catalytic activity;nucleotide binding	Pf00501, Pf13193	3643941		Pyruvate metabolism; Methane metabolism; Metabolic pathways; Propanoate metabolism; Biosynthesis of antibiotics; Biosynthesis of secondary metabolites; Carbon metabolism; Glycolysis / Gluconeogenesis	-8.86166	-1.00421	31.1531	3.53029	-3.14758	-0.00605988	4.96131	1.81979	0.112846	0.995808	31.1531	3.53029	0.0819526	1	0.00509037	0.133202	0.128976	0.99229	0.0126274	0.121199	1.26766e+07	1.4305e+06	4.47523e+07	4.45647e+07
MSO1	Q5A3M2	Mso1p OS=Candida albicans (strain SC5314 / ATCC MYA-2876) OX=237561 GN=MSO1 PE=4 SV=1	24	351	0.378698	64	4	4	0		169	19.3	9.47	152	3002.64	9.36	0	11.448				Pf14475	3642040	W5Q_01176; I503_01186		-6.70633	-1.36326	14.3128	2.90949	-2.74552	-0.447062	3.83923	1.54077	0.149113	0.733535	14.3128	2.90949	0.08208	1	0.00155672	0.203163	0.112676	0.504526	0.0029883	0.156514	3.16199e+06	471492	9.19978e+06	6.74836e+06
PGM2	A0A1D8PSA9	Phosphoglucomutase OS=Candida albicans (strain SC5314 / ATCC MYA-2876) OX=237561 GN=PGM2 PE=3 SV=1	33	274	0.533929	299	11	11	0		560	61.8	5.44	1593	18680.6	99.79	0	58.448	metabolic process		catalytic activity;metal ion binding	Pf00408, Pf02878, Pf02879, Pf02880	3642562	W5Q_05726; I503_05695		-2.81003	-1.68646	5.77674	3.46696	-1.49059	-0.754002	2.53026	1.79367	0.355868	0.592957	5.77674	3.46696	0.082081	0.646705	0.0296601	0.0590442	0.0611744	0.243808	0.0375238	0.052953	1.70429e+07	6.06503e+06	5.90871e+07	3.50361e+07
ENT3	A0A1D8PGL6	Ent3p OS=Candida albicans (strain SC5314 / ATCC MYA-2876) OX=237561 GN=ENT3 PE=4 SV=1	15	304	0.462389	209	7	7	0		452	48.5	5.29	1884	14616.7	63.22	0	33.047				Pf01417	3635813			-2.15559	-2.03781	10.7161	10.1306	-1.10808	-1.02702	3.42171	3.34064	0.463911	0.490724	10.7161	10.1306	0.0823911	0.533202	0.0204283	0.0447976	0.045648	0.273803	0.0349499	0.0748264	3.93953e+06	1.82759e+06	3.99097e+07	1.95846e+07
PRE6	A0A1D8PSS4	Proteasome endopeptidase complex OS=Candida albicans (strain SC5314 / ATCC MYA-2876) OX=237561 GN=PRE6 PE=3 SV=1	18	552	0.168	42	3	3	0		250	27.4	8.18	57	1292.84	0	0	11.053	metabolic process	cytoplasm;proteasome	catalytic activity	Pf00227, Pf10584	30515395	W5Q_05885; I503_05867		-85.3795	1.26311	1001.19	9.2837	-6.41582	0.33698	9.9675	3.2147	0.0117124	1.26311	1001.19	9.2837	0.0832596	1	0.000174992	0.0238591	0.267089	0.45059	0.000872115	0.0383499	141941	1662.47	1.31774e+06	1.66445e+06
CaJ7_0419; CaO19.6701; CAALFM_C703660CA; CaO19.13993	Q59R20	Proline--tRNA ligase OS=Candida albicans (strain SC5314 / ATCC MYA-2876) OX=237561 GN=orf19.6701 PE=3 SV=1	10	444	0.253256	175	5	5	0		691	77.3	6.07	1111	13875	88.61	0	29.04	metabolic process;regulation of biological process	cytoplasm	catalytic activity;nucleotide binding	Pf00587, Pf03129, Pf04073, Pf09180	3646226	W5Q_05396; I503_05359	Aminoacyl-tRNA biosynthesis	-14.8592	-1.16902	159.047	12.5127	-3.89329	-0.225302	7.31331	3.64532	0.0672982	0.855416	159.047	12.5127	0.0843336	1	0.00539543	0.000115542	0.164167	0.568322	0.0197292	0.000210593	9.28305e+06	624733	1.16156e+08	9.93616e+07
HTA2	Q59VP2	Histone H2A.2 OS=Candida albicans (strain SC5314 / ATCC MYA-2876) OX=237561 GN=HTA2 PE=3 SV=3	18	408	0.29771	39	1	1	0		131	13.8	10.24	111	2750.73	27.59	0	6.696	metabolic process;regulation of biological process;response to stimulus	chromosome;nucleus	DNA binding;protein binding	Pf00125	3644715	W5Q_00406; I503_00409		-16.1564	2.53347	77.9446	1.90425	-4.01404	1.34112	6.28438	0.929225	0.0618949	2.53347	77.9446	1.90425	0.0844465	0.47821	0.0390079	0.903569	0.169486	0.320668	0.12257	0.41981	2.93121e+06	181427	5.58177e+06	1.41413e+07
RSM18; CAALFM_C104370CA	Q59KY7	Mitochondrial 37S ribosomal protein RSM18 OS=Candida albicans (strain SC5314 / ATCC MYA-2876) OX=237561 GN=orf19.5201 PE=4 SV=1	16	926	0.03	6	2	2	0		200	22.4	9.76	42	230.2	0	0.002	5.589	metabolic process	ribosome	structural molecule activity	Pf01084	3647994		Ribosome	4.18229	-31.0654	1.17982	153.288	2.06429	-4.95724	0.238573	7.2601	4.18229	0.0321902	1.17982	153.288	0.0850528	0.156328	1	0.103591	0.087787	0.387478	0.886191	0.376039	8835.19	36951.3	1.35433e+06	43596.1
CaO19.2459; CAALFM_C105900WA	A0A1D8PDN5	Uncharacterized protein OS=Candida albicans (strain SC5314 / ATCC MYA-2876) OX=237561 GN=orf19.2459 PE=4 SV=1	4	1059	0.00823045	8	3	3	0		972	104.7	6.46	45	444.47	0	0	7.749		membrane			3639866	I503_00577		-2.83203	-118.509	1.79651	75.1761	-1.50184	-6.88885	0.845193	6.2322	0.353103	0.00843821	1.79651	75.1761	0.0853196	0.109481	1	0.12169	0.0640682	0.3771	0.67141	0.379199	37348.6	13187.9	2.80772e+06	23692.1
CaO19.9103; CaO19.1527; CAALFM_C202110CA	Q5ALP8	Uncharacterized protein OS=Candida albicans (strain SC5314 / ATCC MYA-2876) OX=237561 GN=orf19.1527 PE=4 SV=1	7	1042	0.0108696	2	1	1	0	Acetyl [N-Term]	184	20.7	5.35	33	317.52		0.003	4.183					3635745	W5Q_01656		17.4467	-273.098	-35.7815	133.16	4.12488	-8.09328	-5.16114	7.05702	17.4467	0.00366169	0.0279474	133.16	0.0853736	0.0923655	0.0640558	0.1064	0.176078	0.37377	0.165301	0.375435	4020.78	70149.3	535407	1960.49
SSN2; SRB9	Q5ALX5	Mediator of RNA polymerase II transcription subunit 13 OS=Candida albicans (strain SC5314 / ATCC MYA-2876) OX=237561 GN=SSN2 PE=3 SV=1	1	994	0.0186186	31	1	1	0		1665	186.5	4.82	116	2049.9	13.6	0.003	4.03	metabolic process;regulation of biological process	nucleus		Pf06333	3635845	W5Q_01592; I503_01586		-9.24591	1.14609	39.5932	3.73639	-3.20882	0.196721	5.30718	1.90164	0.108156	1.14609	39.5932	3.73639	0.0853779	1	0.00980471	0.160997	0.136981	0.789197	0.0260177	0.153079	674342	72934.1	2.5196e+06	2.88769e+06
CaO19.4570; CAALFM_C402200CA	A0A1D8PLG7	Uncharacterized protein OS=Candida albicans (strain SC5314 / ATCC MYA-2876) OX=237561 GN=orf19.4570 PE=4 SV=1	32	347	0.383562	56	4	4	0		146	16.8	6.02	245	4882.08	20.08	0	17.667					3635696			-18.8817	1.10451	115.667	5.54623	-4.23892	0.143404	6.85383	2.47151	0.0529613	1.10451	115.667	5.54623	0.0862365	1	0.00309379	0.006531	0.182775	0.722656	0.0106021	0.00807071	1.25196e+06	66305.4	6.94365e+06	7.66932e+06
GIM3; CAALFM_C405860WA	Q5A435	Prefoldin subunit 4 OS=Candida albicans (strain SC5314 / ATCC MYA-2876) OX=237561 GN=orf19.1273 PE=3 SV=1	52	313	0.446154	58	4	4	0		130	15	4.31	333	4285.89	35.21	0	13.685	metabolic process		protein binding	Pf01920	3641792	W5Q_03877; I503_03900		-21.1607	-2.69227	30.1781	3.83956	-4.40331	-1.42882	4.91543	1.94094	0.0472574	0.371434	30.1781	3.83956	0.0875051	0.19783	0.000818888	0.123585	0.192656	0.141332	0.00201259	0.119935	1.71212e+06	80910.6	6.5738e+06	2.44173e+06
MMD1	A0A1D8PDX5	Isoleucine biosynthesis protein OS=Candida albicans (strain SC5314 / ATCC MYA-2876) OX=237561 GN=MMD1 PE=4 SV=1	71	26	4.85256	757	8	8	0		156	17	8.6	5909	64570.6	363.36	0	88.225				Pf01042	30515015	W5Q_00669; I503_00673		-4.58642	-4.54639	16.1099	15.9693	-2.19737	-2.18472	4.00987	3.99723	0.218035	0.219955	16.1099	15.9693	0.0879255	0.0853077	0.000143051	0.028951	0.0966023	0.0931868	0.000286808	0.0578619	3.86851e+07	8.4347e+06	6.17772e+08	1.35882e+08
CSE1; CAALFM_C107690CA	A0A1D8PE78	Importin-alpha export receptor OS=Candida albicans (strain SC5314 / ATCC MYA-2876) OX=237561 GN=orf19.1229 PE=4 SV=1	1	898	0.0354067	37	1	1	0		1045	119.1	5.21	159	1617.52	0	0.007	3.492	transport	nucleus	protein binding	Pf03378, Pf03810, Pf08506	3641767			-2.64624	1.37519	13.8952	3.81832	-1.40395	0.459634	3.79652	1.93294	0.377894	1.37519	13.8952	3.81832	0.0891193	1	0.0215343	0.185673	0.0625593	0.578514	0.0408777	0.179447	340351	128617	1.29957e+06	1.78716e+06
NAG6	Q9C0L9	Protein SEY1 OS=Candida albicans (strain SC5314 / ATCC MYA-2876) OX=237561 GN=SEY1 PE=1 SV=2	2	1067	0.00759494	6	1	1	0		790	90.2	5.12	32	343.03	0	0.002	4.777	response to stimulus;transport	endoplasmic reticulum;membrane	catalytic activity;nucleotide binding	Pf00350, Pf02263, Pf05879	3645961			-13.8419	-452.835	-1.10021	29.7349	-3.79098	-8.82284	-0.137782	4.89408	0.0722442	0.00220831	0.908916	29.7349	0.090025	0.084167	1	0.157377	0.170641	0.371296	0.813702	0.385108	29856.5	2156.96	887779	1960.49
CaO19.7322; CAALFM_CR09240CA	A0A1D8PTY0	Uncharacterized protein OS=Candida albicans (strain SC5314 / ATCC MYA-2876) OX=237561 GN=CAALFM_CR09240CA PE=4 SV=1	72	38	3.70068	544	9	9	0	Acetyl [N-Term]	147	17.2	4.86	4018	50672.2	305.23	0	96.107				Pf04669	3641919	W5Q_06375; I503_06321		-13.5818	-2.08548	9.19105	1.41128	-3.7636	-1.06038	3.20023	0.497009	0.0736279	0.479505	9.19105	1.41128	0.0904302	0.371166	0.00503302	1	0.170172	0.196789	0.00805341	0.598242	6.90489e+07	5.08393e+06	9.74476e+07	4.67266e+07
TIF51; ANB1	O94083	Eukaryotic translation initiation factor 5A OS=Candida albicans (strain SC5314 / ATCC MYA-2876) OX=237561 GN=ANB1 PE=3 SV=2	68	4	16.2595	2569	17	17	0		158	17.1	5.05	22713	213852	1232.41	0	244.138	metabolic process;regulation of biological process	cytoplasm	RNA binding	Pf01287	3641648	W5Q_04740; I503_04723		-7.32895	-1.92219	25.4453	6.67363	-2.87361	-0.942754	4.66933	2.73847	0.136445	0.520239	25.4453	6.67363	0.0905933	0.805515	0.00146436	0.112541	0.130165	0.379701	0.00341879	0.154096	1.05426e+08	1.43849e+07	7.03576e+08	3.66027e+08
APR1	Q59U59	Proteinase A OS=Candida albicans (strain SC5314 / ATCC MYA-2876) OX=237561 GN=APR1 PE=3 SV=1	32	141	1.16945	490	10	10	0		419	45.4	4.83	4431	42324.2	334.47	0	60.566	metabolic process	vacuole	catalytic activity	Pf00026, Pf13650, Pf14541, Pf14543	3645204	W5Q_02160; I503_02176		-3.40717	1.04103	15.6816	4.42115	-1.76857	0.0580114	3.971	2.14442	0.293499	1.04103	15.6816	4.42115	0.0907369	1	0.00494837	0.0411273	0.0802374	0.907858	0.00982499	0.0440971	2.80545e+07	8.23397e+06	1.24033e+08	1.29122e+08
NAB2; CAALFM_C101470WA	A0A1D8PCH2	mRNA-binding protein OS=Candida albicans (strain SC5314 / ATCC MYA-2876) OX=237561 GN=orf19.3333 PE=4 SV=1	20	349	0.38051	164	9	9	0		431	48	8.19	657	10926.4	32.23	0	53.643					3640241			-3.09264	-3.98778	24.996	32.2309	-1.62884	-1.99559	4.64363	5.01037	0.323348	0.250766	24.996	32.2309	0.0909324	0.360776	0.0214426	0.0996698	0.0740571	0.359979	0.0497857	0.249692	1.12593e+06	364068	3.62898e+07	9.10024e+06
CaO19.3487; CAALFM_CR07690WA	A0A1D8PTK4	Uncharacterized protein OS=Candida albicans (strain SC5314 / ATCC MYA-2876) OX=237561 GN=CAALFM_CR07690WA PE=4 SV=1	31	332	0.405405	45	3	3	0		111	12.5	5.73	470	3770.06	28.85	0	13.155				Pf10448	3648194			-27.7755	1.93616	399.69	7.43225	-4.79574	0.953199	8.64274	2.8938	0.036003	1.93616	399.69	7.43225	0.0911226	0.21214	0.000526181	0.0487493	0.2185	0.101106	0.00227382	0.0705353	381022	13717.9	2.83185e+06	5.48291e+06
ALS1	Q5A8T4	Agglutinin-like protein 1 OS=Candida albicans (strain SC5314 / ATCC MYA-2876) OX=237561 GN=ALS1 PE=1 SV=1	6	486	0.216667	273	4	3	0		1260	132.8	4.45	3373	24166.7	236.31	0	48.434	cellular homeostasis;regulation of biological process;response to stimulus	cell surface;extracellular;membrane	protein binding	Pf11766	3640280			3.55362	1.31586	-3.68524	-1.3646	1.82929	0.396011	-1.88176	-0.448482	3.55362	1.31586	0.271353	0.732814	0.0915927	1	0.0639575	1	0.0837747	0.533498	0.0601763	0.681101	1.11273e+07	3.95423e+07	8.15425e+06	1.07299e+07
CaO19.5689; CAALFM_C500080CA	A0A1D8PMT6	Coatomer subunit epsilon OS=Candida albicans (strain SC5314 / ATCC MYA-2876) OX=237561 GN=orf19.5689 PE=3 SV=1	32	631	0.125402	39	5	5	0		311	35.6	4.54	212	2624.33	11.53	0	18.401	transport	cytoplasm;Golgi;membrane	protein binding;structural molecule activity	Pf04733	3647886	W5Q_04045; I503_04043		3.53322	-15.3281	1.6742	90.6703	1.82098	-3.93811	0.743469	6.50256	3.53322	0.0652397	1.6742	90.6703	0.0931842	0.0732727	0.74868	0.0392485	0.0848435	0.144278	0.27831	0.127608	67867.9	239792	6.1536e+06	401459
CaO19.842; ASR3	A0A1D8PH00	Asr3p OS=Candida albicans (strain SC5314 / ATCC MYA-2876) OX=237561 GN=ASR3 PE=4 SV=1	49	432	0.27193	31	6	6	0		114	13	5.88	130	1172.25	0	0	17.179					3637402	W5Q_01811		-4.23268	-5.1761	10.9016	13.3314	-2.08157	-2.37187	3.44646	3.73676	0.236257	0.193195	10.9016	13.3314	0.0932645	0.295708	0.137376	0.153789	0.0970684	0.350689	0.236731	0.287336	489642	115681	6.52763e+06	1.26111e+06
CAALFM_C104430CA	A0A1D8PDA0	Sepiapterin reductase family protein OS=Candida albicans (strain SC5314 / ATCC MYA-2876) OX=237561 GN=orf19.5194.1 PE=4 SV=1	49	371	0.351779	89	8	8	0	Acetyl [N-Term]	253	27.4	6.42	307	4690.86	10.51	0	31.995	metabolic process		catalytic activity	Pf00106, Pf01370, Pf02254, Pf07993, Pf08659, Pf13460, Pf13561	30514986			-9.32462	-3.38707	50.6875	18.4117	-3.22104	-1.76004	5.66356	4.20255	0.107243	0.295241	50.6875	18.4117	0.0935997	0.301459	0.00701352	0.0736077	0.150744	0.265289	0.0198607	0.15467	500423	53666.9	9.21363e+06	2.72024e+06
CaO19.5848; CAALFM_CR05540CA	A0A1D8PT11	Uncharacterized protein OS=Candida albicans (strain SC5314 / ATCC MYA-2876) OX=237561 GN=CAALFM_CR05540CA PE=4 SV=1	2	1062	0.00805153	5	1	1	0		621	69.9	6.3	34	236.9	2.32	0.003	4.008		membrane	metal ion binding	Pf00097, Pf02225, Pf12678, Pf12861, Pf13639, Pf13923, Pf14634	3647594			-3.96034	1.00931	68.4151	17.1157	-1.98563	0.0133655	6.09624	4.09725	0.252503	1.00931	68.4151	17.1157	0.0936877	1	0.00917973	0.0982339	0.0930143	0.989778	0.0279809	0.201245	6583.95	1662.47	112689	113738
DAD1	A0A1D8PFP9	Dad1p OS=Candida albicans (strain SC5314 / ATCC MYA-2876) OX=237561 GN=DAD1 PE=4 SV=1	23	296	0.484848	48	1	1	0		99	11.5	5.03	622	4257.33	27.77	0	7.584	cell organization and biogenesis		protein binding	Pf08649	30515077	W5Q_01324; I503_01356		-187.679	1.29195	1204.11	4.96598	-7.55212	0.369554	10.2338	2.31208	0.00532826	1.29195	1204.11	4.96598	0.0937684	1	0.000283235	0.144612	0.354075	0.563314	0.00144928	0.167178	312010	1662.47	1.54944e+06	2001799
URA4	Q5A1L8	Dihydroorotase OS=Candida albicans (strain SC5314 / ATCC MYA-2876) OX=237561 GN=URA4 PE=3 SV=1	34	368	0.354749	127	7	7	0	Acetyl [N-Term]	358	39.9	6.47	457	8925.87	42.25	0	44.584	metabolic process		catalytic activity	Pf04909	3642632	W5Q_04125; I503_04126	Metabolic pathways; Pyrimidine metabolism	-14.2722	-3.32662	8.43151	1.96525	-3.83513	-1.73406	3.07579	0.974714	0.0700664	0.300606	8.43151	1.96525	0.0942201	0.00433586	0.00246112	0.388984	0.180673	0.00375931	0.00378495	0.189574	1.24552e+07	872691	2.44776e+07	7.3581e+06
CaO19.1933; CAALFM_C501350WA	A0A1D8PN55	Uncharacterized protein OS=Candida albicans (strain SC5314 / ATCC MYA-2876) OX=237561 GN=orf19.1933 PE=4 SV=1	1	944	0.0275974	17	1	1	0		616	72	5.39	146	1060.51	1.71	0.01	3.296		membrane		Pf06398	3642640			-140.459	-1.79091	549.098	7.00122	-7.134	-0.840691	9.10092	2.80761	0.00711952	0.558376	549.098	7.00122	0.0944159	0.774452	0.000238215	0.0746249	0.336782	0.325538	0.00108399	0.104759	233509	1662.47	1.63484e+06	912858
CaO19.11853; CaO19.4375; CAALFM_CR03760WA	Q5A013	Protein N-terminal and lysine N-methyltransferase EFM7 OS=Candida albicans (strain SC5314 / ATCC MYA-2876) OX=237561 GN=EFM7 PE=3 SV=1	14	565	0.160305	42	2	2	0		262	30.4	5.12	89	1702.68	2.02	0	10.728	metabolic process	cytoplasm	catalytic activity	Pf10294, Pf12847	3643178	W5Q_05807; I503_05789		-5.60849	-3.14525	3.91466	2.19535	-2.48761	-1.65317	1.96889	1.13445	0.178301	0.31794	3.91466	2.19535	0.095061	0.105435	0.0420514	0.338664	0.118237	0.0871509	0.0413972	0.192099	1.10818e+06	197589	2.43283e+06	773496
SAC6	A0A1D8PPY8	Fimbrin OS=Candida albicans (strain SC5314 / ATCC MYA-2876) OX=237561 GN=SAC6 PE=4 SV=1	14	281	0.516229	334	9	9	0		647	72	5.48	4449	31834.9	257.46	0	59.262	response to stimulus		metal ion binding;protein binding	Pf00307, Pf13499	3639213	W5Q_04875; I503_04858		-41.8273	-1.39437	91.7316	3.058	-5.38637	-0.479618	6.51935	1.61259	0.0239078	0.717168	91.7316	3.058	0.0968853	1	0.000290057	0.258162	0.26093	0.503706	0.000945489	0.208155	5.58351e+07	1.3349e+06	1.70744e+08	1.22452e+08
HTA1	Q59SU5	Histone H2A.1 OS=Candida albicans (strain SC5314 / ATCC MYA-2876) OX=237561 GN=HTA1 PE=3 SV=3	17	401	0.310606	41	1	1	0		132	14	10.29	39	2038.82	10.77	0.002	5.399	metabolic process;response to stimulus	chromosome;nucleus	DNA binding;protein binding	Pf00125	3645658	W5Q_02904; I503_02898		-26.5575	2.22762	127.506	2.15528	-4.73105	1.1555	6.99443	1.10788	0.0376541	2.22762	127.506	2.15528	0.0970078	0.632552	0.0345148	0.671271	0.229474	0.365458	0.120706	0.371842	1.49639e+06	56345.4	3.22515e+06	7.1844e+06
GIM5	Q5AA13	Gim5p OS=Candida albicans (strain SC5314 / ATCC MYA-2876) OX=237561 GN=GIM5 PE=4 SV=1	30	318	0.436709	69	3	3	0		158	17.7	6.18	718	5127.3	13.01	0	15.288	metabolic process		protein binding	Pf02996	3639886	W5Q_00565; I503_00568		-18.5391	1.25042	226.495	9.77038	-4.2125	0.322416	7.82333	3.28841	0.0539399	1.25042	226.495	9.77038	0.097437	1	0.00697378	0.0786945	0.205227	0.694597	0.0272791	0.12939	883387	47649.8	8.63102e+06	1.07924e+07
MAL2	A0A1D8PUB9	Oligo-1,6-glucosidase IMA1 OS=Candida albicans (strain SC5314 / ATCC MYA-2876) OX=237561 GN=MAL2 PE=4 SV=1	13	748	0.0754386	43	5	5	0		570	66.2	5.36	243	2636.88	6.42	0	20.347	cell communication;metabolic process;response to stimulus	extracellular	catalytic activity	Pf00128, Pf02324	3638946	W5Q_06517; I503_06463	Metabolic pathways; Galactose metabolism; Starch and sucrose metabolism	-11.0995	-6.91124	3.1357	1.95248	-3.47243	-2.78894	1.64879	0.965309	0.090094	0.144692	3.1357	1.95248	0.0979211	0.192363	0.0228108	1	0.170012	0.268245	0.0188051	0.535948	1.5971e+06	143889	3.1183e+06	451193
CAALFM_C302270WA	A0A1D8PJE5	Uncharacterized protein OS=Candida albicans (strain SC5314 / ATCC MYA-2876) OX=237561 GN=orf19.1618.1 PE=4 SV=1	32	488	0.216216	16	1	1	0		74	8.3	9.13	166	1160.28	6.66	0	5.952	metabolic process			Pf05094, Pf08520	30515186	W5Q_02732; W5Q_02717; I503_02723		-99.2861	1.8987	875.685	4.64519	-6.63352	0.92501	9.77427	2.21574	0.0100719	1.8987	875.685	4.64519	0.0981181	0.812759	0.0112428	0.231787	0.325434	0.375905	0.0549453	0.25679	165060	1662.47	766735	1.4558e+06
PPX1; CAALFM_C206110WA	Q59X24	Exopolyphosphatase OS=Candida albicans (strain SC5314 / ATCC MYA-2876) OX=237561 GN=orf19.4107 PE=4 SV=1	19	655	0.114713	46	5	5	0		401	45.9	6.23	127	2302.71	5.9	0	15.31		cytoplasm	catalytic activity	Pf01368, Pf02833	3644094	W5Q_02038; I503_02052	Purine metabolism	-12.1437	-2.58624	100.949	21.4992	-3.60213	-1.37086	6.65748	4.42621	0.0823475	0.386661	100.949	21.4992	0.0983921	0.0476387	0.0179009	0.000721241	0.177211	0.032653	0.0595874	0.00159618	212845	17527.3	4.57599e+06	1.76936e+06
CAALFM_C113260WA	A0A1D8PFM9	Peptidylprolyl isomerase OS=Candida albicans (strain SC5314 / ATCC MYA-2876) OX=237561 GN=orf19.4952.1 PE=4 SV=1	25	225	0.701987	106	3	3	0		151	16.5	5.07	289	4635.44	7.93	0	11.02	metabolic process		catalytic activity	Pf00254	30515074	W5Q_01280; I503_01303		-2.72275	-14.9331	1.75792	9.64144	-1.44506	-3.90045	0.813866	3.26925	0.367276	0.0669652	1.75792	9.64144	0.0990902	0.125977	1	0.159849	0.0715958	0.245683	0.524144	0.261292	1.21722e+07	4.47055e+06	1.17357e+08	7.85885e+06
RIB5	A0A1D8PP67	Riboflavin synthase OS=Candida albicans (strain SC5314 / ATCC MYA-2876) OX=237561 GN=RIB5 PE=4 SV=1	7	317	0.438819	104	2	2	0		237	25.7	5.49	1095	10295.8	50.62	0	19.478	metabolic process		catalytic activity	Pf00677	3636499	W5Q_04549; I503_04547	Metabolic pathways; Biosynthesis of secondary metabolites; Riboflavin metabolism	-3.5584	1.16651	18.368	4.42507	-1.83123	0.222194	4.19912	2.1457	0.281025	1.16651	18.368	4.42507	0.09921	1	6.32677e-05	0.0840936	0.090838	0.657912	0.000132834	0.0902199	1.47049e+06	413244	6.50701e+06	7.59047e+06
TOA1; CAALFM_C403090WA	Q5AFC5	Transcription initiation factor IIA large subunit OS=Candida albicans (strain SC5314 / ATCC MYA-2876) OX=237561 GN=orf19.2682 PE=4 SV=1	5	855	0.0436364	12	1	1	0		275	30.4	4.21	114	954.79	7.9	0.002	4.711	metabolic process		RNA binding	Pf03153	3637926		Basal transcription factors	-9.8202	-4.70052	27.0575	12.9513	-3.29575	-2.23282	4.75796	3.69502	0.101831	0.212742	27.0575	12.9513	0.0993187	0.0367649	0.00353069	0.0136289	0.163665	0.0410447	0.00839943	0.0251796	173181	17635.2	2.24292e+06	477165
TPS3	A0A1D8PIS4	Trehalose 6-phosphate synthase/phosphatase complex subunit OS=Candida albicans (strain SC5314 / ATCC MYA-2876) OX=237561 GN=TPS3 PE=1 SV=1	8	943	0.0278054	28	6	6	0		1007	112.3	5.91	103	1376.97	4.19	0	19.898	metabolic process		catalytic activity	Pf00982, Pf02358	3641205	W5Q_02484		-12.0527	-11.8701	15.0937	14.865	-3.59128	-3.56926	3.91587	3.89385	0.0829692	0.0842454	15.0937	14.865	0.0995704	0.221519	0.117579	0.198811	0.178793	0.395329	0.230213	0.387071	602795	50013.5	8.96058e+06	754888
CaO19.5078; OFR1; CaO19.12544	Q5A784	Ofr1p OS=Candida albicans (strain SC5314 / ATCC MYA-2876) OX=237561 GN=OFR1 PE=4 SV=1	81	32	4.2963	580	14	14	0		135	15.4	9.5	4648	40734.2	232.1	0	90.994	regulation of biological process				3640710	W5Q_00776; I503_00784		-5.48498	1.13616	114.891	18.4362	-2.45549	0.184162	6.84412	4.20447	0.182316	1.13616	114.891	18.4362	0.100189	1	0.0198792	0.0454027	0.123007	0.839022	0.0680277	0.0954471	2.81474e+07	5.13173e+06	5.18931e+08	5.89587e+08
CaO19.14005; CaO19.6713; WOR4	Q5ADX8	Wor4p OS=Candida albicans (strain SC5314 / ATCC MYA-2876) OX=237561 GN=WOR4 PE=4 SV=1	13	756	0.0723192	29	3	3	0		401	45.3	9.01	100	1253.21	0	0	10.235	regulation of biological process	nucleus	DNA binding;metal ion binding		3638454	W5Q_03281; I503_03282		-9.59395	-5.52186	38.6619	22.2521	-3.26213	-2.46515	5.27284	4.47587	0.104232	0.181099	38.6619	22.2521	0.100566	0.133665	0.00175481	0.0529683	0.164029	0.164752	0.00462641	0.11854	706074	73595.8	1.57116e+07	2.84535e+06
YTM1	Q5APF0	Ribosome biogenesis protein YTM1 OS=Candida albicans (strain SC5314 / ATCC MYA-2876) OX=237561 GN=YTM1 PE=3 SV=1	10	536	0.180258	84	5	5	0		466	51.7	6	534	6085.63	32.13	0	21.164	cell communication;metabolic process;response to stimulus	nucleus	protein binding	Pf00400, Pf08154	3634765			-10.5454	-5.27921	30.211	15.1242	-3.39854	-2.40032	4.917	3.91878	0.0948282	0.189422	30.211	15.1242	0.100596	0.0524232	0.000118567	0.0218648	0.17094	0.0629163	0.000291496	0.0428418	437735	41509.6	6.62038e+06	1.25405e+06
CaO19.4628; CAALFM_C401650CA	A0A1D8PLB3	Cleavage polyadenylation factor subunit OS=Candida albicans (strain SC5314 / ATCC MYA-2876) OX=237561 GN=orf19.4628 PE=4 SV=1	9	893	0.0361446	18	4	4	0		498	56.2	6.61	44	742.66	1.86	0	9.437	response to stimulus	nucleus	metal ion binding	Pf00098, Pf08783, Pf13696	3635713		mRNA surveillance pathway	-51.2819	-3.92043	359.627	27.4931	-5.68038	-1.97101	8.49036	4.781	0.0195001	0.255074	359.627	27.4931	0.100632	0.300993	0.000179239	0.0819159	0.285813	0.296631	0.000760904	0.19582	85254.5	1662.47	2.34391e+06	597870
FMP31; CAALFM_CR07020WA	A0A1D8PTD8	Thiosulfate sulfurtransferase OS=Candida albicans (strain SC5314 / ATCC MYA-2876) OX=237561 GN=CAALFM_CR07020WA PE=4 SV=1	35	208	0.779006	141	6	6	0		181	20.3	8.12	453	8613.71	31.36	0	27.932			catalytic activity	Pf00581	3645731	I503_06108		-12.9994	-1.55463	24.9658	2.98573	-3.70037	-0.636574	4.64188	1.57808	0.0769268	0.643238	24.9658	2.98573	0.101216	1	0.00229902	0.237093	0.187268	0.408751	0.00533589	0.187076	7.29549e+06	561218	2.17823e+07	1.40112e+07
ARG5,6	A0A1D8PEI6	Bifunctional acetylglutamate kinase/N-acetyl-gamma-glutamyl-phosphate reductase OS=Candida albicans (strain SC5314 / ATCC MYA-2876) OX=237561 GN=ARG5,6 PE=3 SV=1	5	892	0.0361727	31	3	3	0		857	95	7.55	249	1980.87	6.58	0	11.803	metabolic process	cytoplasm;mitochondrion	catalytic activity;nucleotide binding	Pf00696, Pf01118, Pf02774, Pf04768	3634830		Metabolic pathways; Arginine biosynthesis; Biosynthesis of amino acids; Biosynthesis of antibiotics; Biosynthesis of secondary metabolites; 2-Oxocarboxylic acid metabolism	2.46693	-2.58236	2.4616	15.6816	1.30271	-1.36869	1.2996	3.971	2.46693	0.387242	2.4616	15.6816	0.102494	0.453033	2.16197e-05	0.0762338	0.0667604	0.310031	1.40485e-05	0.151362	211927	522807	3.32336e+06	1.28694e+06
BOI2	A0A1D8PRW9	Boi2p OS=Candida albicans (strain SC5314 / ATCC MYA-2876) OX=237561 GN=BOI2 PE=4 SV=1	3	993	0.0187713	22	2	2	0		1172	126.3	9.28	31	806.5	0	0	9.943	cell organization and biogenesis;response to stimulus		protein binding	Pf00018, Pf00169, Pf07653, Pf14604	3640404			-55.0763	-1.89683	800.981	27.5858	-5.78336	-0.923587	9.64562	4.78585	0.0181566	0.527197	800.981	27.5858	0.102551	1	0.00433878	0.0829902	0.296545	0.501974	0.0209251	0.198589	91562.6	1662.47	2.52582e+06	1.33161e+06
FDH99; FDH1	Q59QN6	Formate dehydrogenase OS=Candida albicans (strain SC5314 / ATCC MYA-2876) OX=237561 GN=FDH1 PE=3 SV=1	47	278	0.530343	201	11	11	0		379	41.8	5.76	870	11262.2	53.17	0	49.681	metabolic process	cytoplasm	catalytic activity;nucleotide binding	Pf00389, Pf02826	3646398	W5Q_05984; I503_05940	Methane metabolism; Carbon metabolism; Glyoxylate and dicarboxylate metabolism; Metabolic pathways	-3.55833	-2.32545	4.56402	2.98268	-1.8312	-1.21751	2.1903	1.57661	0.281031	0.430025	4.56402	2.98268	0.102564	0.701565	0.184729	0.433415	0.0939073	0.42708	0.202307	0.341664	8.91096e+06	2.50425e+06	2.65786e+07	1.14294e+07
SAP99	A0A1D8PGZ9	Sap99p OS=Candida albicans (strain SC5314 / ATCC MYA-2876) OX=237561 GN=SAP99 PE=3 SV=1	17	615	0.137741	50	3	3	0		363	39.1	6.09	401	3591.31	14.95	0	13.062	metabolic process		catalytic activity	Pf00026, Pf14541, Pf14543	3637436	W5Q_01799; I503_01815		-2.61629	2.05452	2.85434	-1.88318	-1.38752	1.0388	1.51316	-0.913168	0.382221	2.05452	2.85434	0.531018	0.102717	0.180355	0.0373584	0.401019	0.0712608	0.0936767	0.0282645	0.183099	3.47411e+06	1.32788e+06	1.84481e+06	3.79021e+06
CaO19.4292; PEP12	A0A1D8PNI0	SNAP receptor OS=Candida albicans (strain SC5314 / ATCC MYA-2876) OX=237561 GN=PEP12 PE=3 SV=1	5	796	0.0615942	17	1	1	0		276	32	4.97	46	442.47	0	0.005	3.88	cell organization and biogenesis;cellular homeostasis;transport	membrane	protein binding	Pf05739	3637737		Phagosome; SNARE interactions in vesicular transport	-3.7755	-2.5067	32.2763	21.4295	-1.91667	-1.32579	5.0124	4.42153	0.264866	0.39893	32.2763	21.4295	0.103059	0.431124	0.0455433	0.0457565	0.0987653	0.285791	0.114141	0.101157	46867.2	12413.5	1.00434e+06	400662
THR4	A0A1D8PNG9	Threonine synthase OS=Candida albicans (strain SC5314 / ATCC MYA-2876) OX=237561 GN=THR4 PE=4 SV=1	60	232	0.686275	350	24	24	0		510	57.7	5.35	2604	22275.7	124.86	0	105.913	metabolic process			Pf00291, Pf14821	3637711	W5Q_04254	Metabolic pathways; Biosynthesis of amino acids; Biosynthesis of secondary metabolites; Glycine, serine and threonine metabolism; Vitamin B6 metabolism	-1.83104	-1.91133	6.05412	6.31961	-0.872661	-0.934578	2.59792	2.65983	0.546138	0.523195	6.05412	6.31961	0.103665	0.573645	0.0101973	0.0586434	0.045232	0.268058	0.0132458	0.0779909	1.07757e+07	5.88501e+06	6.80981e+07	3.56286e+07
TUB1	A0A1D8PTV4	Tubulin alpha chain OS=Candida albicans (strain SC5314 / ATCC MYA-2876) OX=237561 GN=TUB1 PE=3 SV=1	15	436	0.265625	119	5	5	0		448	49.9	5.06	422	6450.22	10.7	0	23.337	cell organization and biogenesis	cytoplasm;cytoskeleton	catalytic activity;nucleotide binding;structural molecule activity	Pf00091, Pf03953	3641930	W5Q_06364; I503_06310		-2.93266	-1.93288	2.02632	1.33552	-1.55221	-0.950751	1.01886	0.417401	0.340987	0.517363	2.02632	1.33552	0.103787	1	0.627447	1	0.0805493	0.517248	0.31964	0.728344	6.6085e+06	2.25342e+06	8.82578e+06	4.56613e+06
CaO19.3226; CAALFM_CR01280CA	Q5A8A2	Phosphatidylglycerol/phosphatidylinositol transfer protein OS=Candida albicans (strain SC5314 / ATCC MYA-2876) OX=237561 GN=NPC2 PE=3 SV=2	23	236	0.671875	129	3	3	0		192	21.2	5.05	752	7634.69	28.12	0	25.409	transport			Pf02221	3640400	I503_05550		-23.7196	-3.15895	3.98139	-1.88595	-4.56801	-1.65944	1.99327	-0.91529	0.0421593	0.316561	3.98139	0.530237	0.104452	0.241521	0.0262402	1	0.238568	0.200395	0.026152	0.555188	2.62664e+07	1.10737e+06	1.39274e+07	4.40889e+06
CaO19.2269; CAALFM_C207140WA	A0A1D8PHU6	Putative phosphoric monoester hydrolase OS=Candida albicans (strain SC5314 / ATCC MYA-2876) OX=237561 GN=orf19.2269 PE=4 SV=1	23	526	0.183673	45	3	3	0		245	27.7	4.83	177	2754.81	6.1	0	17.384	metabolic process		catalytic activity	Pf00702, Pf12710, Pf13419	3643508			-5.79647	-1.4001	4.16754	1.00664	-2.53517	-0.485525	2.0592	0.00954532	0.172519	0.714237	4.16754	1.00664	0.105519	1	0.00956325	1	0.133755	0.56211	0.0098463	0.992008	2.37689e+06	410059	2.39267e+06	1.70894e+06
CPY1	A0A1D8PRC2	Carboxypeptidase OS=Candida albicans (strain SC5314 / ATCC MYA-2876) OX=237561 GN=CPY1 PE=3 SV=1	16	590	0.149446	81	5	5	0		542	61	5.47	434	4433.04	16.94	0	28.409	metabolic process	vacuole	catalytic activity	Pf00450, Pf05388	3646721	I503_05331		-4.28591	-14.1995	2.7416	9.0831	-2.0996	-3.82777	1.45502	3.18319	0.233323	0.0704251	2.7416	9.0831	0.105755	0.0979446	0.114847	0.128028	0.111022	0.187455	0.0835525	0.203768	2.05909e+06	480433	1.8703e+07	1.31716e+06
NUT2; MED10	Q5A3K2	Mediator of RNA polymerase II transcription subunit 10 OS=Candida albicans (strain SC5314 / ATCC MYA-2876) OX=237561 GN=NUT2 PE=3 SV=1	18	447	0.247059	42	2	2	0		170	18.7	5.17	45	2563.33	20.23	0	7.806	metabolic process;regulation of biological process	nucleus		Pf09748	3642043	W5Q_01158; I503_01168		-74.7555	1.58074	1973.59	16.7014	-6.22411	0.660602	10.9466	4.06189	0.0133769	1.58074	1973.59	16.7014	0.105882	1	0.0256102	0.07322	0.32951	0.595118	0.140172	0.148706	211339	2827.07	3.52965e+06	5.57947e+06
CaO19.374; CAALFM_C400070CA	A0A1D8PKX5	Putative zinc metalloprotease OS=Candida albicans (strain SC5314 / ATCC MYA-2876) OX=237561 GN=orf19.374 PE=4 SV=1	7	969	0.0227273	18	4	4	0		792	90.2	5.8	125	1152.34	5.02	0	11.822	metabolic process		catalytic activity	Pf02225, Pf04253, Pf04389	3648063	I503_03309		-3.69291	-3.91906	-1.51226	-1.425	-1.88476	-1.97051	-0.59671	-0.510962	0.270789	0.255164	0.66126	0.701754	0.108192	0.465842	1	1	0.101958	0.458972	0.335676	0.70027	810763	219546	568957	145177
CaO19.2534; PIN4	A0A1D8PRZ6	Pin4p OS=Candida albicans (strain SC5314 / ATCC MYA-2876) OX=237561 GN=PIN4 PE=4 SV=1	8	1045	0.010453	9	2	2	0		861	94.7	7.85	51	585.69	0	0	9.809	cell communication;response to stimulus		RNA binding	Pf00076, Pf13893, Pf14259	3640101			-105.802	-1.22632	1610.27	18.6642	-6.72522	-0.294337	10.6531	4.2222	0.00945164	0.815447	1610.27	18.6642	0.10876	1	0.0122475	0.0597362	0.365717	0.768328	0.0652366	0.126109	175892	1662.47	3.28288e+06	2.67702e+06
CaO19.1782; CAALFM_C210010CA	Q59XW9	Increased recombination centers protein 22-2 OS=Candida albicans (strain SC5314 / ATCC MYA-2876) OX=237561 GN=IRC22-2 PE=3 SV=2	5	452	0.242678	58	1	1	0		239	25.9	6.04	247	3532.57	35.44	0	6.095		endoplasmic reticulum;membrane			3643962	I503_02426		-3.29221	-2.36428	3.44722	2.47559	-1.71906	-1.2414	1.78543	1.30778	0.303747	0.422962	3.44722	2.47559	0.108992	0.218101	0.0511549	0.205074	0.0936821	0.135375	0.0456668	0.134095	5.92333e+06	1.79919e+06	1.46638e+07	6.20221e+06
BOS1; CAALFM_C102510WA	Q5AIB3	Protein transport protein BOS1 OS=Candida albicans (strain SC5314 / ATCC MYA-2876) OX=237561 GN=orf19.2940 PE=3 SV=1	9	512	0.197531	48	2	2	0		243	28.2	7.49	703	3789.45	23.08	0	18.029	cell organization and biogenesis;transport	Golgi;membrane	protein binding	Pf12352	3636796	W5Q_00242; I503_00241	SNARE interactions in vesicular transport	-102.323	2.47315	2069.26	8.17698	-6.67698	1.30635	11.0149	3.03157	0.00977301	2.47315	2069.26	8.17698	0.109461	0.309016	0.0110267	0.00627183	0.365434	0.201842	0.0607288	0.00950674	170108	1662.47	1.39097e+06	3.44009e+06
SWI3; CAALFM_C204620WA	A0A1D8PH73	Uncharacterized protein OS=Candida albicans (strain SC5314 / ATCC MYA-2876) OX=237561 GN=orf19.4488 PE=4 SV=1	2	1080	0.0061792	6	2	2	0		971	109.2	4.44	70	433.85	1.67	0	7.16		nucleus	DNA binding;protein binding	Pf00249, Pf04433, Pf13921	3645438			20.3797	-44.689	-4.47911	203.332	4.34906	-5.48185	-2.16321	7.6677	20.3797	0.0223769	0.223259	203.332	0.109598	0.139778	0.301742	0.0979424	0.238324	0.38312	0.326366	0.375496	8590.58	175073	1.74674e+06	39086.6
PEX7	Q59WW3	Pex7p OS=Candida albicans (strain SC5314 / ATCC MYA-2876) OX=237561 GN=PEX7 PE=4 SV=1	8	995	0.0184211	7	2	2	0		380	42.5	6.86	45	409	4.39	0	7.019	cell organization and biogenesis;metabolic process;transport	cytosol	protein binding	Pf00400	3644027	I503_04653	Peroxisome	1.52632	-4.53061	-1.09815	6.29707	0.610056	-2.1797	-0.135079	2.65468	1.52632	0.220721	0.91062	6.29707	0.110433	0.302623	1	0.221844	0.0336852	0.329814	0.820096	0.294463	121651	185678	766044	169082
TPM2	A0A1D8PTR7	Tropomyosin OS=Candida albicans (strain SC5314 / ATCC MYA-2876) OX=237561 GN=TPM2 PE=4 SV=1	65	237	0.652174	105	12	12	0		161	19	4.58	730	7264.31	35.11	0	44.869	metabolic process			Pf03961, Pf04111, Pf04156, Pf12718	30515441	W5Q_06307; I503_06253		-5.69538	-2.44612	7.32367	3.14545	-2.50979	-1.29049	2.87257	1.65327	0.175581	0.408812	7.32367	3.14545	0.110739	0.323029	0.00185092	0.213464	0.138966	0.208433	0.00265845	0.176457	6.23082e+06	1.09401e+06	1.95988e+07	8.0122e+06
CLU1; CAALFM_C104970WA	Q59MA9	Clustered mitochondria protein homolog OS=Candida albicans (strain SC5314 / ATCC MYA-2876) OX=237561 GN=CLU1 PE=3 SV=2	2	1008	0.0161409	22	2	2	0		1363	155.7	5.39	50	1238.18	1.74	0.002	5.349	cell organization and biogenesis	cytoplasm	protein binding	Pf12807, Pf13236, Pf13374, Pf13424, Pf15044	3647528	I503_00489		-5.95601	-1.51781	90.0896	22.9581	-2.57435	-0.601991	6.49329	4.52093	0.167898	0.658844	90.0896	22.9581	0.110941	1	0.000311877	0.169279	0.1428	0.745023	0.00101255	0.38265	59544.9	9997.45	1.36704e+06	900666
SOL2; CAALFM_C209970CA	Q59YH1	Uncharacterized protein OS=Candida albicans (strain SC5314 / ATCC MYA-2876) OX=237561 GN=orf19.1355 PE=4 SV=1	5	871	0.0403458	14	1	1	0		347	38.6	7.02	87	925.01	4.66	0.003	4.279	metabolic process		catalytic activity	Pf01182	3643820	W5Q_02416; I503_02422	Pentose phosphate pathway; Metabolic pathways; Biosynthesis of antibiotics; Biosynthesis of secondary metabolites; Carbon metabolism	-73.6193	1.90377	6.59416	-21.2543	-6.20201	0.92886	2.72119	-4.40968	0.0135834	1.90377	6.59416	0.0470493	0.111583	0.853048	0.0903959	0.1637	0.34602	0.396181	0.122992	0.360932	4.83999e+06	65743.4	227718	433523
GPH1	A0A1D8PQQ3	Alpha-1,4 glucan phosphorylase OS=Candida albicans (strain SC5314 / ATCC MYA-2876) OX=237561 GN=GPH1 PE=3 SV=1	8	791	0.0622222	56	4	4	0		900	102.8	6.02	405	4019.82	14.77	0	20.149	metabolic process	cell surface	catalytic activity	Pf00343	3637956	W5Q_05146; I503_05102	Starch and sucrose metabolism; Biosynthesis of secondary metabolites; Metabolic pathways	-4.34557	-4.50894	2.4736	2.5666	-2.11954	-2.17279	1.30661	1.35986	0.23012	0.221782	2.4736	2.5666	0.112436	0.232259	0.0315723	0.539754	0.119156	0.252325	0.0206263	0.366994	4.63633e+06	1.06691e+06	1.18996e+07	2.63911e+06
CaO19.13576; CaO19.6196; CAALFM_C107080WA	Q5AAW4	Uncharacterized protein OS=Candida albicans (strain SC5314 / ATCC MYA-2876) OX=237561 GN=orf19.6196 PE=4 SV=1	35	664	0.111702	21	4	4	0		188	21.6	6.37	101	1503.32	9.86	0	18.156					3639489	W5Q_00687; I503_00691		-72.4787	-2.74398	143.664	5.439	-6.17949	-1.45627	7.16656	2.44334	0.0137971	0.364434	143.664	5.439	0.112922	0.558179	0.0275956	0.245618	0.348901	0.40643	0.0988829	0.300064	491102	6775.8	2.6711e+06	973441
ATP14	A0A1D8PHL7	F1F0 ATP synthase subunit h OS=Candida albicans (strain SC5314 / ATCC MYA-2876) OX=237561 GN=ATP14 PE=4 SV=1	65	221	0.722222	78	3	3	0		108	12	5.25	465	7282.02	46.66	0	32.417	metabolic process;transport			Pf10775	30515134	W5Q_02056; I503_02071		-48.2008	-1.25726	871.297	22.7268	-5.59098	-0.330285	9.76702	4.50632	0.0207466	0.79538	871.297	22.7268	0.11395	1	0.0144913	0.0607482	0.318547	0.753199	0.0707683	0.136875	4.6568e+06	96612.5	1.05834e+08	8.41781e+07
ENO1	P30575	Enolase 1 OS=Candida albicans (strain SC5314 / ATCC MYA-2876) OX=237561 GN=ENO1 PE=2 SV=1	85	18	5.96591	2625	33	33	0		440	47.2	5.81	26084	229653	1604.27	0	308.668	metabolic process;regulation of biological process;response to stimulus	cell surface;cytoplasm;cytosol;extracellular;membrane;nucleus	catalytic activity;metal ion binding;protein binding	Pf00113, Pf03952	3646493	W5Q_00818; I503_00826	Biosynthesis of secondary metabolites; RNA degradation; Carbon metabolism; Methane metabolism; Biosynthesis of amino acids; Glycolysis / Gluconeogenesis; Biosynthesis of antibiotics; Metabolic pathways	-2.80273	-2.00112	7.44581	5.31622	-1.48683	-1.00081	2.89643	2.4104	0.356794	0.499721	7.44581	5.31622	0.114141	0.130253	0.0212363	0.00551882	0.0848543	0.0651789	0.0307546	0.00665128	4.63828e+08	1.65491e+08	2.46581e+09	1.23222e+09
CaO19.2901; NUP60	A0A1D8PMK3	FG-nucleoporin OS=Candida albicans (strain SC5314 / ATCC MYA-2876) OX=237561 GN=NUP60 PE=4 SV=1	6	619	0.13257	81	3	3	0		611	68.1	9.54	689	5146.61	28.89	0	10.102	transport		structural molecule activity;transporter activity		3642826			-7.71942	-1.07267	55.5896	7.72458	-2.94849	-0.101206	5.79674	2.94946	0.129543	0.932254	55.5896	7.72458	0.114454	1	0.0195964	0.0365694	0.168734	0.891722	0.0567976	0.05393	4.10464e+06	531729	3.17066e+07	2.95586e+07
ARP9	Q5A9X7	Arp9p OS=Candida albicans (strain SC5314 / ATCC MYA-2876) OX=237561 GN=ARP9 PE=3 SV=1	12	628	0.126033	61	4	4	0		484	54.6	4.96	195	3268.26	7.97	0	14.799	cell organization and biogenesis				3639829	I503_02598		-7.90303	-1.10769	35.9729	5.04199	-2.98241	-0.147558	5.16884	2.33399	0.126534	0.902777	35.9729	5.04199	0.114518	1	0.00935576	0.198748	0.170769	0.881577	0.0241792	0.231938	1.33513e+06	168939	6.73172e+06	6.07724e+06
SSB1	Q5A397	Hsp70 family ATPase OS=Candida albicans (strain SC5314 / ATCC MYA-2876) OX=237561 GN=SSB1 PE=3 SV=1	50	188	0.840131	515	21	20	0		613	66.4	5.38	4633	35002.2	201.62	0	115.654	cell organization and biogenesis;metabolic process;regulation of biological process;response to stimulus	cell surface;membrane	nucleotide binding	Pf00012, Pf06723	3642095	W5Q_06268; I503_06215	Endocytosis; Longevity regulating pathway - multiple species; Spliceosome; Protein processing in endoplasmic reticulum	-1.92138	-3.37137	1.87582	3.29144	-0.942139	-1.75333	0.907525	1.71872	0.520461	0.296615	1.87582	3.29144	0.114942	0.433961	0.362713	0.446007	0.0541455	0.380439	0.164585	0.383281	3.51861e+07	1.8313e+07	1.15813e+08	3.4352e+07
RKI1	Q5AJ92	Ribose-5-phosphate isomerase OS=Candida albicans (strain SC5314 / ATCC MYA-2876) OX=237561 GN=RKI1 PE=3 SV=2	54	133	1.25	300	10	10	0		240	26	5.82	1721	25290.9	128.38	0	61.171	metabolic process	cytoplasm	catalytic activity	Pf06026	3636574	W5Q_02637; I503_02643	Biosynthesis of antibiotics; Pentose phosphate pathway; Carbon metabolism; Metabolic pathways; Biosynthesis of amino acids; Biosynthesis of secondary metabolites	-1.67697	-1.71922	21.4393	21.9794	-0.745858	-0.781753	4.42219	4.45808	0.596313	0.58166	21.4393	21.9794	0.115412	0.955536	0.0182144	0.0284684	0.0430406	0.373497	0.0402737	0.0634572	4.47699e+06	2.66969e+06	9.84018e+07	5.72364e+07
YNK1	Q5AG68	Nucleoside diphosphate kinase OS=Candida albicans (strain SC5314 / ATCC MYA-2876) OX=237561 GN=YNK1 PE=3 SV=1	73	27	4.63576	700	9	9	0		151	16.9	6.57	5872	58062.8	409.13	0	122.605	metabolic process	cytosol	catalytic activity;nucleotide binding	Pf00334	3637746	W5Q_04314; I503_04314	Metabolic pathways; Biosynthesis of secondary metabolites; Biosynthesis of antibiotics; Pyrimidine metabolism; Purine metabolism	-2.63636	-2.64792	6.33791	6.36569	-1.39855	-1.40486	2.66401	2.67032	0.379311	0.377655	6.33791	6.36569	0.115436	0.0507712	0.00782171	0.00878203	0.0807213	0.0356632	0.0104186	0.0117254	9.36747e+07	3.55318e+07	5.96304e+08	2.25198e+08
EGD1	Q59TU0	Nascent polypeptide-associated complex subunit beta OS=Candida albicans (strain SC5314 / ATCC MYA-2876) OX=237561 GN=EGD1 PE=3 SV=1	59	128	1.27389	200	6	6	0		157	17	5.71	1643	17572.4	114.91	0	45.116	metabolic process;regulation of biological process;transport	cytoplasm;nucleus		Pf01849	3645340	W5Q_01127; I503_01137		-12.6098	1.42363	114.153	6.35888	-3.65648	0.509577	6.83483	2.66877	0.0793032	1.42363	114.153	6.35888	0.116332	1	0.0154432	0.107472	0.212683	0.571631	0.0527757	0.143409	1.15426e+07	915364	7.3398e+07	1.04492e+08
CaO19.9818; CaO19.2278; CAALFM_C207220WA	A0A1D8PHU2	Proteasome assembly chaperone 2 OS=Candida albicans (strain SC5314 / ATCC MYA-2876) OX=237561 GN=orf19.2278 PE=3 SV=1	58	263	0.564394	149	8	8	0		264	29.5	5.16	733	9842.66	51.67	0	42.21				Pf09754	3643483	W5Q_02142; I503_02158		-3.47098	-2.30434	9.63471	6.39635	-1.79534	-1.20435	3.26824	2.67725	0.288103	0.433964	9.63471	6.39635	0.11644	0.396908	0.0418093	0.068517	0.104525	0.239009	0.0683214	0.0917185	2.48194e+06	715053	1.58753e+07	6.88933e+06
CaO19.4953; CAALFM_C113270WA; CaO19.12418	Q5AL24	Nicotinamide-nucleotide adenylyltransferase OS=Candida albicans (strain SC5314 / ATCC MYA-2876) OX=237561 GN=orf19.4953 PE=4 SV=1	9	483	0.218121	65	3	3	0		298	34.3	7.02	272	4036.81	16.22	0	13.407	metabolic process		catalytic activity		3636144	W5Q_01281; I503_01304; I503_01310	Nicotinate and nicotinamide metabolism; Metabolic pathways	-13.6257	-5.84022	6.45121	2.7651	-3.76826	-2.54602	2.68957	1.46733	0.0733907	0.171227	6.45121	2.7651	0.117349	0.0749714	0.000840436	0.307132	0.2211	0.0954395	0.00113021	0.225332	2.36611e+06	173650	6.54253e+06	1.12025e+06
CaO19.4340; CAALFM_C503100CA; CaO19.11815	Q5AG39	Uncharacterized protein OS=Candida albicans (strain SC5314 / ATCC MYA-2876) OX=237561 GN=orf19.4340 PE=4 SV=1	21	806	0.0572289	19	4	4	0		332	38.4	5.07	47	935.4	2.28	0	11.474			RNA binding	Pf10309	3637704	W5Q_04335; I503_04335		-6.69032	-12.488	5.78455	10.7973	-2.74207	-3.64247	2.5322	3.4326	0.14947	0.0800768	5.78455	10.7973	0.118073	0.070522	0.00199599	0.0778491	0.161883	0.128437	0.00252713	0.133612	403635	60331.2	4.35818e+06	348989
SXM1; CAALFM_C202720WA	A0A1D8PGN9	Uncharacterized protein OS=Candida albicans (strain SC5314 / ATCC MYA-2876) OX=237561 GN=orf19.5834 PE=4 SV=1	2	886	0.0369261	37	2	2	0		1002	114.3	4.79	135	1571.27	4.18	0	6.376	transport	nucleus	protein binding	Pf03810, Pf08506	3643002	W5Q_01708		-16.136	-1.0211	48.8228	3.08955	-4.01221	-0.0301237	5.60948	1.6274	0.0619733	0.979336	48.8228	3.08955	0.118729	1	0.0406017	0.294902	0.238183	0.976053	0.113877	0.239961	272457	16885	841770	824376
CaO19.11626; CaO19.4150; CAALFM_C501560CA	Q59NQ2	Glutathione-disulfide reductase OS=Candida albicans (strain SC5314 / ATCC MYA-2876) OX=237561 GN=orf19.4150 PE=4 SV=1	16	638	0.122271	28	2	2	0		229	25.5	7.93	115	2031.3	22.84	0	9.215	cellular homeostasis;metabolic process;regulation of biological process		catalytic activity	Pf00462	3647064	W5Q_04186; I503_04187		-3.30156	-4.35193	-1.79497	-1.36174	-1.72315	-2.12166	-0.843962	-0.445452	0.302888	0.229783	0.557112	0.734354	0.119316	0.0680361	0.241246	1	0.102799	0.0721746	0.101801	0.542583	1.59003e+06	481599	1.16764e+06	268305
BLP1	P0CT51	Blood-induced peptide 1 OS=Candida albicans (strain SC5314 / ATCC MYA-2876) OX=237561 GN=BLP1 PE=1 SV=1	60	129	1.27273	98	5	5	0		77	9	5.54	318	4278.34	3.35	0	27.168					30515065	W5Q_01245; I503_01267		-7.0175	1.52174	10.9006	1.02077	-2.81096	0.605722	3.44634	0.0296573	0.142501	1.52174	10.9006	1.02077	0.120059	1	0.0904713	1	0.168741	0.631675	0.155897	0.980887	8.96526e+06	1.27756e+06	9.15146e+06	1.39261e+07
SGT2	Q5A0I8	Sgt2p OS=Candida albicans (strain SC5314 / ATCC MYA-2876) OX=237561 GN=SGT2 PE=4 SV=1	21	154	1.09012	375	7	7	0	Acetyl [N-Term]	344	36.4	4.93	3600	31847	119.92	0	53.676			protein binding	Pf00515, Pf07719, Pf13414, Pf13424, Pf13432	3642978	I503_01729		-21.2879	-1.0596	190.519	9.48307	-4.41196	-0.0835259	7.57379	3.24535	0.0469749	0.943748	190.519	9.48307	0.120386	1	0.00417651	0.0706794	0.26557	0.915218	0.015816	0.11469	4.62045e+07	2.17045e+06	4.3816e+08	4.13513e+08
CaO19.6658; CAALFM_C503490CA	A0A1D8PNP4	Uncharacterized protein OS=Candida albicans (strain SC5314 / ATCC MYA-2876) OX=237561 GN=orf19.6658 PE=4 SV=1	10	853	0.0441989	24	3	3	0		543	60.5	5.92	90	1292.84	2.02	0	11.089					3646967	W5Q_04369; I503_04366		-61.6832	-6.50706	55.9256	5.89968	-5.94681	-2.70201	5.80544	2.56064	0.0162119	0.153679	55.9256	5.89968	0.120977	0.0012075	0.0432663	0.00775985	0.359712	0.00163134	0.12559	0.00993508	102546	1662.47	604991	92974.5
RIM1	Q5AA01	Rim1p OS=Candida albicans (strain SC5314 / ATCC MYA-2876) OX=237561 GN=RIM1 PE=4 SV=1	36	75	2.08392	298	5	5	0		143	16.2	6.55	2577	20811	120.83	0	33.203	metabolic process		DNA binding	Pf00436	3639898	W5Q_00553; I503_00556		-13.0069	-2.14477	81.7456	13.4794	-3.70121	-1.10082	6.35307	3.75268	0.0768821	0.466251	81.7456	13.4794	0.121679	0.593054	0.0188953	0.0568373	0.22518	0.326423	0.0600217	0.106646	1.40386e+07	1.07931e+06	1.89231e+08	8.82292e+07
FET34	A0A1D8PPC9	Ferroxidase OS=Candida albicans (strain SC5314 / ATCC MYA-2876) OX=237561 GN=FET34 PE=3 SV=1	30	111	1.52	950	11	10	2		625	70.9	4.67	6067	67013.9	409.22	0	89.483	cell communication;metabolic process;response to stimulus;transport	membrane	catalytic activity;metal ion binding	Pf00394, Pf07731, Pf07732	3647131			-4.31056	-2.61464	-1.68446	-2.77704	-2.10787	-1.38661	-0.752286	-1.47355	0.231989	0.382462	0.593662	0.360095	0.121688	0.261546	0.441227	0.275316	0.128251	0.181331	0.165964	0.202846	8.7241e+08	2.02389e+08	3.14151e+08	1.20151e+08
XYL2	A0A1D8PUB4	L-iditol 2-dehydrogenase OS=Candida albicans (strain SC5314 / ATCC MYA-2876) OX=237561 GN=XYL2 PE=3 SV=1	23	600	0.141667	51	6	6	0		360	38.7	5.97	386	3425.21	13.86	0	30.353	metabolic process		catalytic activity;metal ion binding	Pf00107, Pf08240	3638961	W5Q_06522; I503_06468	Metabolic pathways; Pentose and glucuronate interconversions	-2.25779	-10.4309	2.74014	12.6594	-1.17491	-3.3828	1.45425	3.66214	0.44291	0.0958686	2.74014	12.6594	0.122149	0.228686	0.589986	0.206303	0.0717574	0.3868	0.428994	0.377755	1.21458e+06	537952	1.53759e+07	1.47406e+06
CaO19.1034; CAALFM_C103750WA	A0A1D8PD35	Uncharacterized protein OS=Candida albicans (strain SC5314 / ATCC MYA-2876) OX=237561 GN=orf19.1034 PE=3 SV=1	15	818	0.0546448	10	2	2	0		183	21.2	6.02	60	485.32	3.96	0	8.07		membrane		Pf00173	3644690	W5Q_00364		-57.018	-1.92713	160.368	5.42023	-5.83335	-0.946455	7.32525	2.43835	0.0175383	0.518906	160.368	5.42023	0.122921	1	0.0143979	0.268872	0.358519	0.548897	0.0527341	0.327803	94790.7	1662.47	513787	266607
STH1; CAALFM_C302490CA	A0A1D8PJG4	RSC chromatin remodeling complex ATPase subunit OS=Candida albicans (strain SC5314 / ATCC MYA-2876) OX=237561 GN=orf19.239 PE=4 SV=1	2	1057	0.00921659	12	2	2	0		1302	149.7	5.9	118	765.55	2.29	0	7.822			nucleotide binding;protein binding	Pf00176, Pf00271, Pf00439, Pf07529, Pf11496, Pf14619	3638351			-7.99338	-7.44619	4.89988	4.56446	-2.99881	-2.8965	2.29275	2.19044	0.125104	0.134297	4.89988	4.56446	0.123204	0.160466	0.075655	0.255541	0.184732	0.232395	0.0867289	0.279874	262128	32793.1	1.19647e+06	160682
CaO19.716; CAALFM_CR06500CA	A0A1D8PTA6	Uncharacterized protein OS=Candida albicans (strain SC5314 / ATCC MYA-2876) OX=237561 GN=CAALFM_CR06500CA PE=4 SV=1	35	357	0.373494	62	4	4	0		166	18.9	5.47	653	5490.65	42.07	0	17.894					3645274	I503_06059		-18.2399	-1.56399	84.0125	7.20369	-4.18903	-0.64523	6.39253	2.84874	0.0548248	0.639391	84.0125	7.20369	0.123984	1	0.00137692	0.0413795	0.259687	0.338248	0.004401	0.0589397	1.51016e+06	82794	1.08787e+07	6.95573e+06
NCE103	Q5AJ71	Carbonic anhydrase OS=Candida albicans (strain SC5314 / ATCC MYA-2876) OX=237561 GN=NCE103 PE=1 SV=1	5	589	0.149466	42	1	1	0		281	31.6	6.15	725	3875.98	28.05	0	6.205	regulation of biological process	cytoplasm;mitochondrion;nucleus	catalytic activity;metal ion binding	Pf00484	3636621		Nitrogen metabolism	-11.6941	-1.05467	97.2804	8.77352	-3.54771	-0.0767922	6.60408	3.13316	0.0855129	0.948164	97.2804	8.77352	0.124676	1	0.000452128	0.00455527	0.221158	0.808361	0.00149294	0.00713618	193154	16517.1	1.69464e+06	1.6068e+06
TIF46; TIF4631	A0A1D8PI73	Translation initiation factor eIF4G OS=Candida albicans (strain SC5314 / ATCC MYA-2876) OX=237561 GN=TIF4631 PE=4 SV=1	7	957	0.0249077	27	5	5	0		1084	118.2	6.13	160	1576.84	4.35	0	15.615	metabolic process		protein binding;RNA binding	Pf02854, Pf12152	3643880		RNA transport	-2.93558	-3.7791	3.10995	4.00357	-1.55365	-1.91804	1.63689	2.00129	0.340648	0.264614	3.10995	4.00357	0.125006	0.346459	0.110263	0.323229	0.0971077	0.332261	0.0902444	0.323437	882916	300764	3.53481e+06	935359
MMS2; CAALFM_C112650CA	A0A1D8PFF9	E2 ubiquitin-conjugating protein OS=Candida albicans (strain SC5314 / ATCC MYA-2876) OX=237561 GN=orf19.6358 PE=4 SV=1	17	608	0.138686	19	3	3	0		137	15.6	6.32	121	1073.49	2.53	0	12.282				Pf00179	3646836	W5Q_01225; I503_01243		-3.13489	-3.42534	-1.09008	1.00236	-1.64842	-1.77625	-0.124431	0.00339842	0.31899	0.291942	0.917366	1.00236	0.125084	0.0714461	1	1	0.103095	0.063453	0.724978	0.995801	2.58536e+07	8.24705e+06	2.59146e+07	7.56556e+06
CaO19.715; CAALFM_CR06510WA	A0A1D8PT83	Uncharacterized protein OS=Candida albicans (strain SC5314 / ATCC MYA-2876) OX=237561 GN=CAALFM_CR06510WA PE=4 SV=1	23	722	0.0875	14	4	4	0		160	18.5	5.11	65	651.97	0	0	10.319					3645264			-10.4035	-57.5343	3.17347	17.5501	-3.379	-5.84635	1.66606	4.13341	0.0961214	0.017381	3.17347	17.5501	0.125672	0.12674	0.61155	0.187908	0.212323	0.370484	0.50944	0.388351	309474	29747.1	5.43132e+06	94401.5
PRE7; CAALFM_C402470CA	A0A1D8PLK1	Proteasome core particle subunit beta 6 OS=Candida albicans (strain SC5314 / ATCC MYA-2876) OX=237561 GN=orf19.2755 PE=4 SV=1	5	708	0.0938776	23	1	1	0		245	27.3	5.53	189	1438.99	5.52	0.002	5.231	metabolic process	nucleus;proteasome	catalytic activity	Pf00227	3637869	W5Q_03546; I503_03538	Proteasome	-49.1441	-1.75982	258.757	9.26593	-5.61895	-0.815429	8.01545	3.21194	0.0203483	0.568239	258.757	9.26593	0.125929	0.0360723	0.00138214	0.000583902	0.353794	0.0147072	0.00553924	0.000937727	81700.5	1662.47	757031	430175
CaO19.12049; CaO19.4580; CAALFM_C402110WA	Q5AMR6	Uncharacterized protein OS=Candida albicans (strain SC5314 / ATCC MYA-2876) OX=237561 GN=orf19.4580 PE=4 SV=1	8	739	0.079096	14	1	1	0		177	20.3	4.44	100	984.41	2.1	0	6.278					3635673	W5Q_03511; I503_03503		-4.59802	-1.83317	11.1113	4.42995	-2.20101	-0.874344	3.47396	2.14729	0.217485	0.545502	11.1113	4.42995	0.126599	0.268111	0.00224815	0.0273738	0.139323	0.117211	0.00390499	0.0293897	371891	80880.6	1.64746e+06	898692
CaO19.461; MHP1	A0A1D8PT36	Mhp1p OS=Candida albicans (strain SC5314 / ATCC MYA-2876) OX=237561 GN=MHP1 PE=4 SV=1	1	1043	0.0107527	13	1	1	0		1209	134.6	6.87	50	470.4	0	0.003	4.358	cell communication;response to stimulus				3642460			-49.2369	1.2278	766.503	12.6793	-5.62167	0.296076	9.58215	3.6644	0.02031	1.2278	766.503	12.6793	0.126656	1	0.00278216	0.0199473	0.35601	0.607165	0.0133296	0.0365474	81854.8	1662.47	1.03786e+06	1.27429e+06
SLA1	Q5ALV2	Actin cytoskeleton-regulatory complex protein SLA1 OS=Candida albicans (strain SC5314 / ATCC MYA-2876) OX=237561 GN=SLA1 PE=1 SV=1	14	743	0.0771679	97	11	11	0		1257	138.8	6.05	311	4871.32	15.88	0	40.811	cell organization and biogenesis;regulation of biological process;transport	cytoplasm;cytoskeleton;endosome;membrane;nucleus	protein binding	Pf00018, Pf03983, Pf07653, Pf08226, Pf09606, Pf09770, Pf14604	3635739	W5Q_01608; I503_01602		-2.0868	-4.33897	3.37049	7.00808	-1.06129	-2.11735	1.75296	2.80902	0.479203	0.23047	3.37049	7.00808	0.127001	0.198408	0.00653112	0.122369	0.0673927	0.21005	0.00572439	0.171869	1.85984e+06	891242	1.30339e+07	3.00393e+06
CaO19.7297; CAALFM_CR09010CA	A0A1D8PTV7	Putative cystathionine beta-lyase OS=Candida albicans (strain SC5314 / ATCC MYA-2876) OX=237561 GN=CAALFM_CR09010CA PE=3 SV=1	43	383	0.331593	127	8	8	0		383	42.4	6.06	392	5907.42	3.68	0	41.412	metabolic process		catalytic activity	Pf01053, Pf02347	3641892	W5Q_06354; I503_06300	Sulfur metabolism; Biosynthesis of antibiotics; Biosynthesis of amino acids; Cysteine and methionine metabolism; Biosynthesis of secondary metabolites; Metabolic pathways; Selenocompound metabolism	-3.95502	1.14286	22.4446	4.96559	-1.98368	0.192648	4.4883	2.31197	0.252843	1.14286	22.4446	4.96559	0.127762	1	0.00189287	0.085858	0.12672	0.745098	0.00424789	0.0992504	1.88511e+06	476637	9.36068e+06	1.06979e+07
CaO19.2930; CAALFM_C102430CA	A0A1D8PCQ3	Eukaryotic translation initiation factor 2A OS=Candida albicans (strain SC5314 / ATCC MYA-2876) OX=237561 GN=orf19.2930 PE=3 SV=1	16	772	0.066874	43	8	8	0		643	71	9.06	228	2321.54	11.33	0	27.02	metabolic process;regulation of biological process		protein binding;RNA binding	Pf08662	3636846			-5.35599	-1.80676	13.3212	4.4937	-2.42115	-0.853402	3.73566	2.1679	0.186707	0.553478	13.3212	4.4937	0.127783	1	0.0477352	0.22995	0.154692	0.506295	0.0891611	0.249254	1.58759e+06	296413	7.13414e+06	3.94859e+06
PRT1; CaJ7_0160	Q5AGV4	Eukaryotic translation initiation factor 3 subunit B OS=Candida albicans (strain SC5314 / ATCC MYA-2876) OX=237561 GN=PRT1 PE=3 SV=1	4	907	0.0338295	25	3	3	0		739	84.2	6.39	134	1176.83	1.69	0	7.439	metabolic process;response to stimulus	cytoplasm	protein binding;RNA binding	Pf00076, Pf08662, Pf13893, Pf14259	3636959	W5Q_05188; I503_05147	RNA transport	-6.25102	-1.59991	22.2437	5.69314	-2.64409	-0.677988	4.47533	2.50922	0.159974	0.625036	22.2437	5.69314	0.128839	0.260854	0.000303959	0.00788074	0.170331	0.0884278	0.000680158	0.00988728	1.3344e+06	213469	7.59692e+06	4.74835e+06
MOG1; CAALFM_C601380CA	Q5A4J5	Ran GTPase-binding protein OS=Candida albicans (strain SC5314 / ATCC MYA-2876) OX=237561 GN=orf19.3446 PE=4 SV=1	41	272	0.539216	110	5	5	0	Acetyl [N-Term]	204	23.6	4.75	862	8612.33	56.03	0	21.949				Pf04603	3641606			-2.20068	-1.71758	21.8855	17.0812	-1.13795	-0.780379	4.4519	4.09433	0.454406	0.582214	21.8855	17.0812	0.129554	0.185548	1.68231e-05	0.00256877	0.0737127	0.0723987	3.74475e-05	0.00525871	1.183e+06	537564	2.02071e+07	1.17649e+07
CaO19.1795; PUF3	A0A1D8PMA5	mRNA-binding protein OS=Candida albicans (strain SC5314 / ATCC MYA-2876) OX=237561 GN=PUF3 PE=4 SV=1	3	822	0.0527449	49	4	4	0		929	102.1	6.46	337	3674.57	18.45	0	18.557	cell organization and biogenesis;regulation of biological process		RNA binding	Pf00806	3646950			-3.61168	-3.60913	5.66946	5.66545	-1.85267	-1.85165	2.50321	2.50219	0.276879	0.277075	5.66946	5.66545	0.130374	0.348846	0.0173802	0.214917	0.12077	0.322971	0.0217532	0.268882	683820	189336	3.87415e+06	1.07343e+06
PKA1; CaO19.2015; BCY1	Q9HEW1	cAMP-dependent protein kinase regulatory subunit OS=Candida albicans (strain SC5314 / ATCC MYA-2876) OX=237561 GN=BCY1 PE=3 SV=1	27	541	0.174292	80	8	8	0	Acetyl [N-Term]	459	50.3	5.48	182	3958.03	2.4	0	24.31	cell communication;regulation of biological process;response to stimulus	nucleus	enzyme regulator activity;nucleotide binding	Pf00027, Pf02197	3638832			-4.1168	-1.71316	8.25606	3.43567	-2.04152	-0.776662	3.04545	1.78059	0.242907	0.583716	8.25606	3.43567	0.13043	1	0.0177364	0.229335	0.133138	0.432203	0.0270078	0.204176	1.82036e+06	442178	6.25416e+06	3.65065e+06
GCV1	A0A1D8PPW9	Aminomethyltransferase OS=Candida albicans (strain SC5314 / ATCC MYA-2876) OX=237561 GN=GCV1 PE=3 SV=1	17	775	0.0659898	26	4	4	0		394	43.7	7.61	71	1322.13	8.93	0	12.008	metabolic process	mitochondrion	catalytic activity	Pf01571, Pf08669	3639172			-3.20722	-7.90771	6.84677	16.8814	-1.68132	-2.98326	2.77542	4.07736	0.311796	0.126459	6.84677	16.8814	0.131451	0.104475	0.283062	0.0618652	0.110506	0.155839	0.392809	0.126123	198286	61824.8	3.34733e+06	423300
PUT2	Q5AK46	1-pyrroline-5-carboxylate dehydrogenase OS=Candida albicans (strain SC5314 / ATCC MYA-2876) OX=237561 GN=PUT2 PE=3 SV=1	13	595	0.142857	85	6	6	0		595	65.7	7.58	287	4302.3	9.45	0	20.685	metabolic process		catalytic activity	Pf00171	3636439		Arginine and proline metabolism; Metabolic pathways; Alanine, aspartate and glutamate metabolism	2.08864	-3.80311	1.79384	14.249	1.06256	-1.92718	0.843048	3.83279	2.08864	0.262943	1.79384	14.249	0.133149	0.327351	0.692407	0.113626	0.0707396	0.315432	0.291866	0.217752	858243	1.79256e+06	1.22291e+07	3.21556e+06
PRD1	Q5A2A7	Metalloendopeptidase OS=Candida albicans (strain SC5314 / ATCC MYA-2876) OX=237561 GN=PRD1 PE=3 SV=1	8	836	0.048433	34	2	2	0		702	81.7	5.94	178	1822.52	0	0	10.067	metabolic process		catalytic activity;metal ion binding	Pf01432	3642471	I503_00520		-5.03671	-1.41174	13.2251	3.70687	-2.33248	-0.497474	3.72521	1.8902	0.198542	0.708346	13.2251	3.70687	0.134469	1	0.00345484	0.133711	0.156823	0.485053	0.006435	0.126371	740430	147007	2.74468e+06	1.94418e+06
CaO19.13346; CaO19.5925; CAALFM_C304650WA	Q5ANH8	Uncharacterized protein OS=Candida albicans (strain SC5314 / ATCC MYA-2876) OX=237561 GN=orf19.5925 PE=4 SV=1	7	535	0.180371	68	2	2	0		377	43.5	4.97	416	3324.6	12.35	0	11.244	metabolic process		catalytic activity	Pf04476	3635192	W5Q_02974; I503_02968		-3.0307	4.04748	9.13955	-1.34216	-1.59965	2.01702	3.19212	-0.424553	0.329957	4.04748	9.13955	0.74507	0.134726	0.00274946	0.00029526	1	0.107757	0.00277286	0.000471254	0.557016	1.39957e+06	461798	1.04278e+06	4.22062e+06
CaO19.3286; CAALFM_CR00690CA	A0A1D8PRS1	Uncharacterized protein OS=Candida albicans (strain SC5314 / ATCC MYA-2876) OX=237561 GN=CAALFM_CR00690CA PE=4 SV=1	4	978	0.0210773	9	1	1	0		427	48.9	5.25	64	430.55	3.43	0.002	5.328	metabolic process			Pf12999, Pf13015	3640390		Protein processing in endoplasmic reticulum	-35.9425	-7.52709	109.653	22.9635	-5.16762	-2.91209	6.7768	4.52127	0.0278222	0.132854	109.653	22.9635	0.135112	0.123327	0.000158567	0.0656405	0.349103	0.179569	0.000537288	0.148389	59753.4	1662.47	1.37214e+06	182294
FBA1	Q9URB4	Fructose-bisphosphate aldolase OS=Candida albicans (strain SC5314 / ATCC MYA-2876) OX=237561 GN=FBA1 PE=1 SV=2	68	41	3.50696	1259	19	19	0		359	39.2	6.06	12273	106847	580.94	0	165.318	metabolic process;regulation of biological process;response to stimulus	cell surface;cytoplasm;membrane	catalytic activity;metal ion binding;protein binding	Pf01116	3635585	W5Q_03476; W5Q_03468; I503_03468	Metabolic pathways; Biosynthesis of antibiotics; Fructose and mannose metabolism; Methane metabolism; Biosynthesis of amino acids; Carbon metabolism; Pentose phosphate pathway; Biosynthesis of secondary metabolites; Glycolysis / Gluconeogenesis	-2.22703	-1.80539	2.63043	2.13242	-1.15512	-0.852312	1.3953	1.09249	0.449028	0.553896	2.63043	2.13242	0.135146	0.974773	0.050317	0.623799	0.078055	0.415406	0.0351037	0.340747	1.72556e+08	7.74824e+07	3.67961e+08	2.03812e+08
CaO19.448; CUE5	A0A1D8PDI5	Ubiquitin-binding protein OS=Candida albicans (strain SC5314 / ATCC MYA-2876) OX=237561 GN=CUE5 PE=4 SV=1	6	1007	0.0164319	7	2	2	0		426	48	4.87	41	256.93	0	0.002	5.505			protein binding	Pf02845	3642467	W5Q_00505		-7.56708	-14.9828	8.84066	17.5045	-2.91974	-3.90524	3.14415	4.12966	0.132151	0.066743	8.84066	17.5045	0.135453	0.204561	0.255247	0.191006	0.197743	0.399431	0.401267	0.394395	67464.3	8915.5	1.18093e+06	78818.8
GLR1	Q59NQ5	Glutathione reductase OS=Candida albicans (strain SC5314 / ATCC MYA-2876) OX=237561 GN=GLR1 PE=3 SV=1	17	489	0.215116	111	5	5	0		516	56.4	7.53	501	7392.19	47.63	0	23.316	cellular homeostasis;metabolic process;regulation of biological process;response to stimulus		antioxidant activity;catalytic activity;nucleotide binding	Pf00070, Pf02852, Pf07992	3647061		Glutathione metabolism	-2.66951	-2.23375	1.5061	1.26025	-1.41657	-1.15947	0.590816	0.33371	0.374601	0.447677	1.5061	1.26025	0.135716	0.0248944	0.471003	1	0.0961257	0.0144321	0.139138	0.4589	7.5863e+06	2.84183e+06	9.56064e+06	4.28008e+06
YND1; CAALFM_C406230CA	Q5A1A4	Apyrase OS=Candida albicans (strain SC5314 / ATCC MYA-2876) OX=237561 GN=orf19.2915 PE=3 SV=1	4	1018	0.0143885	10	2	2	0		695	78.6	6.23	48	516.07	0	0	7.169		membrane	catalytic activity	Pf01150	3642808	W5Q_03912; I503_03937	Purine metabolism; Pyrimidine metabolism	-11.0068	-19.56	4.35783	7.74423	-3.46033	-4.28984	2.12361	2.95312	0.0908527	0.0511246	4.35783	7.74423	0.136702	0.084429	0.0371858	0.146003	0.236518	0.181093	0.0394841	0.215582	136685	12418.2	1.05852e+06	54116.5
CUP9; CaJ7_0235	Q5AH24	Cup9p OS=Candida albicans (strain SC5314 / ATCC MYA-2876) OX=237561 GN=CUP9 PE=4 SV=1	15	856	0.0436047	15	2	2	0		344	38.6	9.83	21	392.18	0	0.002	5.325	regulation of biological process	nucleus	DNA binding	Pf05920	3636950	W5Q_05247; I503_05206		-3.95587	1.05054	550.661	132.504	-1.984	0.0711348	9.10502	7.04989	0.252789	1.05054	550.661	132.504	0.13718	1	0.0205882	0.0357578	0.136082	0.946136	0.0937279	0.126044	6576.51	1662.47	871413	915457
DOT5	Q5A7P9	Thioredoxin peroxidase OS=Candida albicans (strain SC5314 / ATCC MYA-2876) OX=237561 GN=DOT5 PE=4 SV=1	38	344	0.387833	102	7	7	0		263	29.1	4.98	617	6544.9	27.55	0	36.326	cellular homeostasis;metabolic process;regulation of biological process		antioxidant activity;catalytic activity	Pf00578, Pf08534	3640519	W5Q_02538; I503_02545		-11.5509	-1.28979	66.9634	7.47726	-3.52993	-0.367141	6.0653	2.90251	0.0865735	0.775317	66.9634	7.47726	0.137267	1	0.00239621	0.0691289	0.242271	0.624949	0.00726688	0.100324	3.92262e+06	339595	2.93305e+07	2.27404e+07
INO80; CAALFM_CR04720CA	Q59KI4	Chromatin-remodeling ATPase INO80 OS=Candida albicans (strain SC5314 / ATCC MYA-2876) OX=237561 GN=INO80 PE=3 SV=2	1	1101	0.00216294	3	1	1	0		1387	158.7	8.09	47	223.32	0	0.003	4.49	cell organization and biogenesis;metabolic process;regulation of biological process;response to stimulus	nucleus	catalytic activity;DNA binding;nucleotide binding	Pf00176, Pf00271, Pf11496, Pf13892	3648140			-4.56312	-37.893	4.39622	36.507	-2.19002	-5.24386	2.13626	5.1901	0.219148	0.0263901	4.39622	36.507	0.138767	0.145759	0.353375	0.147416	0.151951	0.382169	0.377451	0.382551	7586.05	1662.47	276944	7308.57
CAALFM_C101930WA	A0A1D8PCL8	Uncharacterized protein OS=Candida albicans (strain SC5314 / ATCC MYA-2876) OX=237561 GN=orf19.4530.1 PE=4 SV=1	23	517	0.188525	69	4	4	0		366	40.6	4.84	536	4202.37	29.85	0	14.072					30514966	W5Q_00183; I503_00185		-1.95214	3.25245	1.18442	-5.3606	-0.965053	1.70153	0.244186	-2.42239	0.512259	3.25245	1.18442	0.186546	0.140124	0.160853	1	0.0112758	0.0676136	0.136848	0.700353	0.0136573	4.05724e+06	2.07836e+06	756863	2.46166e+06
CPR6	Q5ACI8	Peptidyl-prolyl cis-trans isomerase D OS=Candida albicans (strain SC5314 / ATCC MYA-2876) OX=237561 GN=CPR6 PE=3 SV=2	12	456	0.241192	89	3	2	0		369	40.7	6.39	556	4651.8	5.71	0	14.796	metabolic process	cytoplasm	catalytic activity;protein binding	Pf00160, Pf07719, Pf13181, Pf13414, Pf13424, Pf13432	3639020	W5Q_06505; I503_06451		-5.44731	-6.85812	10.6609	13.422	-2.44554	-2.77781	3.41425	3.74652	0.183577	0.145813	10.6609	13.422	0.140403	0.217904	0.0441229	0.143508	0.171681	0.302649	0.0753234	0.268829	511440	93888.6	6.86454e+06	1.00094e+06
HXK2	P83776	Hexokinase-2 OS=Candida albicans (strain SC5314 / ATCC MYA-2876) OX=237561 GN=HXK2 PE=1 SV=2	26	441	0.258264	125	7	7	0		484	53.4	5.55	961	9506.72	55.09	0	36.345	cellular homeostasis;metabolic process	cytoplasm	catalytic activity;nucleotide binding	Pf00349, Pf03727	3641015		Metabolic pathways; Biosynthesis of antibiotics; Fructose and mannose metabolism; Starch and sucrose metabolism; Carbon metabolism; Glycolysis / Gluconeogenesis; Biosynthesis of secondary metabolites; Galactose metabolism; Amino sugar and nucleotide sugar metabolism	-2.36566	-1.39124	4.03686	2.37407	-1.24224	-0.476371	2.01323	1.24736	0.422715	0.718783	4.03686	2.37407	0.140406	1	0.00558944	0.357317	0.0872092	0.520188	0.00562642	0.222852	3.74031e+06	1.58108e+06	8.87975e+06	6.38262e+06
YAH1	A0A1D8PJS2	Adrenodoxin OS=Candida albicans (strain SC5314 / ATCC MYA-2876) OX=237561 GN=YAH1 PE=4 SV=1	14	416	0.289941	49	2	2	0		169	18.9	5.92	238	2241.37	4.75	0	11.765	metabolic process		catalytic activity	Pf00111	3638368	W5Q_02850; I503_02837		-4.54335	-17.093	2.10722	7.92777	-2.18376	-4.09534	1.07534	2.98692	0.220102	0.0585034	2.10722	7.92777	0.1407	0.140382	0.934863	0.213731	0.153628	0.287456	0.502647	0.319199	2.41667e+06	531912	1.91588e+07	1.12085e+06
CaJ7_0193; CaO19.13907; CaO19.6554; CAALFM_C701700WA	Q5AGY4	Uncharacterized protein OS=Candida albicans (strain SC5314 / ATCC MYA-2876) OX=237561 GN=orf19.6554 PE=4 SV=1	31	376	0.345455	95	5	5	0		275	31.5	6.65	680	7178.01	32.68	0	26.282					3637013	W5Q_05213; I503_05172		-24.0798	1.33368	1012.31	31.5217	-4.58975	0.415409	9.98343	4.97827	0.0415286	1.33368	1012.31	31.5217	0.142199	1	0.0320797	0.0368303	0.32633	0.726379	0.160133	0.0916757	391677	16265.8	1.23463e+07	1.6466e+07
GLO3	Q5A7M1	ADP-ribosylation factor GTPase-activating protein OS=Candida albicans (strain SC5314 / ATCC MYA-2876) OX=237561 GN=GLO3 PE=4 SV=1	21	634	0.124169	56	8	8	0		451	49.3	9.07	470	3502.07	16.82	0	27.045	regulation of biological process		enzyme regulator activity;metal ion binding	Pf01412	3640556	W5Q_02515; I503_02522	Endocytosis	-2.36687	-3.63325	9.91881	15.2258	-1.24298	-1.86126	3.31017	3.92844	0.422498	0.275236	9.91881	15.2258	0.142286	0.505136	0.0199497	0.183689	0.0884294	0.470094	0.0330184	0.360807	2.15492e+06	910450	3.28103e+07	9.03057e+06
CAALFM_C502810WA	A0A1D8PNJ9	U6 snRNA-associated Sm-like protein LSm8 OS=Candida albicans (strain SC5314 / ATCC MYA-2876) OX=237561 GN=LSM8 PE=3 SV=1	14	868	0.0410959	6	2	2	0		146	16.8	7.02	62	398.66	1.82	0	6.087	metabolic process			Pf01423	30515304	I503_04308		-4.40817	-13.4521	5.08931	15.5307	-2.14018	-3.74976	2.34747	3.95705	0.226852	0.0743378	5.08931	15.5307	0.142361	0.17147	0.00850595	0.1603	0.152339	0.321487	0.00998374	0.317157	35880.5	8139.54	557249	41424.7
MYO2	Q5AKW2	Myosin 2 OS=Candida albicans (strain SC5314 / ATCC MYA-2876) OX=237561 GN=MYO2 PE=3 SV=1	1	902	0.0345932	54	1	1	0		1561	178.6	6	237	3023.38	8.62	0	9.247	cell organization and biogenesis;metabolic process;regulation of biological process;response to stimulus		catalytic activity;motor activity;nucleotide binding;protein binding;structural molecule activity	Pf00038, Pf00063, Pf00612, Pf01576, Pf01843, Pf03962, Pf04111, Pf05622, Pf05701, Pf07888, Pf09728, Pf10174, Pf10186, Pf10498, Pf11559, Pf12128, Pf13166, Pf13863	3636140	W5Q_01331; I503_01363		-23.8791	-1.49873	608.404	38.1853	-4.57768	-0.583738	9.24889	5.25495	0.0418776	0.667233	608.404	38.1853	0.144563	1	0.00506268	0.0572163	0.330881	0.59607	0.0234121	0.150334	39698.3	1662.47	1.51589e+06	1.01145e+06
Gal11; MED15	A0A1D8PEC5	Med15p OS=Candida albicans (strain SC5314 / ATCC MYA-2876) OX=237561 GN=MED15 PE=4 SV=1	3	1054	0.00960699	11	2	2	0		1145	128.2	9.86	35	450.36	1.63	0	7.069	regulation of biological process		protein binding	Pf05397	3640761			-14.8878	-1.42101	258.414	24.6652	-3.89605	-0.506921	8.01354	4.6244	0.0671693	0.703723	258.414	24.6652	0.144772	1	0.0181659	0.0204695	0.28202	0.54187	0.0727864	0.0473296	24750.4	1662.47	610474	429605
SNZ99; SNZ1	Q5AIA6	Pyridoxine biosynthesis protein OS=Candida albicans (strain SC5314 / ATCC MYA-2876) OX=237561 GN=SNZ1 PE=3 SV=1	44	327	0.414384	121	10	10	0		292	31.8	6.01	799	9795.98	74.56	0	52.849	metabolic process	cytoplasm	catalytic activity	Pf01680, Pf05690, Pf13500	3636803	W5Q_00249; I503_00248	Vitamin B6 metabolism	-6.81326	-3.80101	6.39065	3.56524	-2.76834	-1.92638	2.67596	1.834	0.146773	0.263088	6.39065	3.56524	0.145559	0.0874114	0.00768695	0.122883	0.201478	0.0841939	0.010285	0.112683	6.45377e+06	947237	2.30092e+07	6.05346e+06
CaO19.7210; CAALFM_C114030WA	A0A1D8PFU2	Uncharacterized protein OS=Candida albicans (strain SC5314 / ATCC MYA-2876) OX=237561 GN=orf19.7210 PE=3 SV=1	41	538	0.179104	60	8	8	0	Acetyl [N-Term]	335	37.4	6.8	159	3001.74	8.06	0	26.11				Pf01875	3643340	W5Q_01356; I503_01388		-5.70154	-4.90007	35.4538	30.47	-2.51135	-2.2928	5.14787	4.92932	0.175391	0.204079	35.4538	30.47	0.14648	0.00390521	1.93891e-06	0.000905398	0.183931	0.00447694	4.99062e-06	0.0022315	536834	94155.9	1.63573e+07	3.33819e+06
ARO9	A0A1D8PMC5	Aromatic-amino-acid:2-oxoglutarate transaminase OS=Candida albicans (strain SC5314 / ATCC MYA-2876) OX=237561 GN=ARO9 PE=1 SV=1	7	936	0.0286807	15	2	2	0		523	58.8	5.74	26	624.32	0	0	6.86	metabolic process		catalytic activity	Pf00155	3641773	W5Q_03846; I503_03870	Phenylalanine, tyrosine and tryptophan biosynthesis; Biosynthesis of antibiotics; Phenylalanine metabolism; Metabolic pathways; Biosynthesis of secondary metabolites; Tyrosine metabolism	-17.4129	-3.67832	30.5455	6.45245	-4.12209	-1.87905	4.93289	2.68985	0.0574286	0.271863	30.5455	6.45245	0.147972	0.0109745	0.00173465	0.0095085	0.304977	0.0103108	0.00427842	0.0127882	288917	16592.1	1.86422e+06	506814
ECE1	Q07730	Extent of cell elongation protein 1 OS=Candida albicans (strain SC5314 / ATCC MYA-2876) OX=237561 GN=ECE1 PE=1 SV=2	75	10	10.0701	2729	20	20	0		271	28.9	5.77	30545	235220	1659.06	0	176.799	regulation of biological process	extracellular;membrane			3646814	W5Q_03617; I503_03640		-1.49388	-1.37964	-1.26106	-1.36548	-0.579063	-0.46429	-0.334638	-0.449411	0.669398	0.724828	0.792983	0.732342	0.149826	1	1	1	0.0433795	0.398557	0.299301	0.275047	2.11854e+09	1.41815e+09	1.55149e+09	1.12457e+09
CaJ7_0501; CMT1; CAALFM_C704280CA	A0A1D8PRK7	Uncharacterized protein OS=Candida albicans (strain SC5314 / ATCC MYA-2876) OX=237561 GN=orf19.7140 PE=4 SV=1	13	890	0.0362903	9	3	3	0		248	28.2	5.26	71	468.09	0	0	7.489	metabolic process		catalytic activity	Pf01596, Pf12847, Pf13578, Pf13659	3643173	W5Q_05457; I503_05421	Metabolic pathways; Tyrosine metabolism	4.23665	-23.132	-3.58381	27.3458	2.08293	-4.53182	-1.84149	4.77325	4.23665	0.0432302	0.279033	27.3458	0.150279	0.140602	0.224253	0.13215	0.15651	0.318592	0.20648	0.315393	20823.2	88220.9	569428	24616.5
CaO19.7949; CaO19.317; PNP1	A0A1D8PJL8	Purine nucleoside phosphorylase OS=Candida albicans (strain SC5314 / ATCC MYA-2876) OX=237561 GN=PNP1 PE=3 SV=1	8	793	0.0618893	19	1	1	0		307	33.4	6.18	46	633.48	0	0	7.645	metabolic process		catalytic activity	Pf01048	3638426	W5Q_02871; I503_02864	Purine metabolism; Nicotinate and nicotinamide metabolism; Biosynthesis of secondary metabolites; Metabolic pathways; Pyrimidine metabolism	-12.7666	-2.30199	37.1598	6.70039	-3.67431	-1.20288	5.21567	2.74424	0.0783291	0.434407	37.1598	6.70039	0.151393	0.331767	0.0144102	0.0559056	0.278132	0.199538	0.0375795	0.0767093	299833	23485.6	2.009e+06	872722
LYS12	Q5A9D9	Homoisocitrate dehydrogenase OS=Candida albicans (strain SC5314 / ATCC MYA-2876) OX=237561 GN=LYS12 PE=4 SV=1	13	555	0.167553	63	5	5	0		376	40.6	5.85	305	3791.67	18.34	0	19.18	metabolic process		catalytic activity;metal ion binding;nucleotide binding	Pf00180	3640134	W5Q_05599; I503_05562	Biosynthesis of amino acids; 2-Oxocarboxylic acid metabolism; Metabolic pathways; Biosynthesis of antibiotics; Lysine biosynthesis	2.6939	-1.11332	1.0187	3.05526	1.4297	-0.154864	0.0267311	1.61129	2.6939	0.898217	1.0187	3.05526	0.151459	1	1	0.595393	0.10827	0.920996	0.975528	0.479676	743376	2.00258e+06	2.2712e+06	2.04003e+06
CaO19.3912; GLN3	A0A1D8PNX9	Nitrogen-responsive transcriptional regulator OS=Candida albicans (strain SC5314 / ATCC MYA-2876) OX=237561 GN=GLN3 PE=4 SV=1	2	821	0.0527859	36	1	1	0		682	74.1	9.77	216	2442.18	8.18	0.002	4.843	cell communication;regulation of biological process;response to stimulus		DNA binding;metal ion binding	Pf00320	3636453			-19.5399	-1.91952	387.761	38.0922	-4.28835	-0.940749	8.59902	5.25142	0.0511774	0.520962	387.761	38.0922	0.152334	0.889231	0.00304213	0.0506898	0.32663	0.418272	0.0130797	0.133097	32484.5	1662.47	1.2374e+06	644641
NUP1; CAALFM_C603460WA	A0A1D8PQ58	FG-nucleoporin OS=Candida albicans (strain SC5314 / ATCC MYA-2876) OX=237561 GN=orf19.5710 PE=4 SV=1	9	972	0.0223945	26	6	6	0		1161	123.1	9.26	99	1119.68	2.26	0	18.191					3640252			-16.8856	-10.4624	1.31638	-1.22604	-4.07772	-3.38714	0.396577	-0.294003	0.0592221	0.0955804	1.31638	0.815636	0.152526	0.230912	1	1	0.310979	0.391065	0.715427	0.876836	3.62599e+06	214739	2.95749e+06	282678
VMA4	A0A1D8PS38	H(+)-transporting V1 sector ATPase subunit E OS=Candida albicans (strain SC5314 / ATCC MYA-2876) OX=237561 GN=VMA4 PE=3 SV=1	52	89	1.82301	412	13	13	0		226	25.4	5.4	2814	32679.4	170.34	0	91.685	transport		catalytic activity;transporter activity	Pf01991	3640111	W5Q_05924; I503_05615		-5.47582	-1.70969	29.2648	9.13724	-2.45307	-0.773737	4.8711	3.19176	0.182621	0.5849	29.2648	9.13724	0.152669	1	0.0017208	0.180071	0.187254	0.600225	0.00419108	0.287372	7.57987e+06	1.38425e+06	6.92591e+07	4.05097e+07
CaO19.3183; CAALFM_C501890WA	A0A1D8PNB1	Uncharacterized protein OS=Candida albicans (strain SC5314 / ATCC MYA-2876) OX=237561 GN=orf19.3183 PE=4 SV=1	21	872	0.0401786	9	3	3	0		224	24.3	6.23	0	338.6	0	0	7.25					3643750			-11.4569	-1.46887	67.5807	8.66443	-3.51814	-0.554707	6.07854	3.11511	0.0872839	0.680796	67.5807	8.66443	0.152715	1	0.00169125	0.0470699	0.268636	0.444995	0.00514018	0.0733139	87971.2	7678.47	762221	518916
SGN11; CAALFM_C209650WA	A0A1D8PIF0	Uncharacterized protein OS=Candida albicans (strain SC5314 / ATCC MYA-2876) OX=237561 GN=orf19.1389 PE=4 SV=1	21	299	0.478528	78	2	2	0		163	18.5	6.62	797	7981.03	69.76	0	16.54			RNA binding	Pf00076, Pf13893, Pf14259	3643794		mRNA surveillance pathway	-2.31251	-5.13565	1.847	4.10184	-1.20946	-2.36055	0.885183	2.03627	0.432431	0.194717	1.847	4.10184	0.153113	0.0173251	0.0343602	0.0274964	0.0925919	0.0204484	0.0152075	0.0279951	3.54348e+06	1.53231e+06	1.45348e+07	2.83018e+06
GCV2	A0A1D8PE97	Glycine cleavage system P protein OS=Candida albicans (strain SC5314 / ATCC MYA-2876) OX=237561 GN=GCV2 PE=3 SV=1	1	1100	0.003003	3	1	1	0		999	109.8	6.58	70	196.03	0	0.009	3.314	metabolic process	mitochondrion	catalytic activity	Pf00266, Pf02347	3646505		Biosynthesis of secondary metabolites; Biosynthesis of antibiotics; Glycine, serine and threonine metabolism; Carbon metabolism; Metabolic pathways; Glyoxylate and dicarboxylate metabolism	-7.93183	-108.788	1.06762	14.6428	-2.98765	-6.76537	0.0943962	3.87212	0.126074	0.00919221	1.06762	14.6428	0.153916	0.110436	1	0.206779	0.229924	0.37357	0.783469	0.400336	14565.4	1836.32	213277	1960.49
PRB11; PRB1	Q59Z57	Prb1p OS=Candida albicans (strain SC5314 / ATCC MYA-2876) OX=237561 GN=PRB1 PE=3 SV=1	8	779	0.0645161	30	3	3	0		465	50.2	5.64	243	2108.58	17.63	0	11.931	metabolic process	vacuole	catalytic activity	Pf00082, Pf05922	3643521	W5Q_02111; I503_02127		-11.9406	-6.06652	6.95404	3.53306	-3.5778	-2.60087	2.79785	1.82092	0.0837479	0.164839	6.95404	3.53306	0.154116	0.112694	0.130776	0.247256	0.275698	0.146552	0.182945	0.225117	613438	51374.1	2.16731e+06	357258
IDP2	A0A1D8PS79	Isocitrate dehydrogenase [NADP] OS=Candida albicans (strain SC5314 / ATCC MYA-2876) OX=237561 GN=IDP2 PE=3 SV=1	31	465	0.230583	95	10	10	0		412	46.3	5.87	594	4948.4	18.97	0	35.088	metabolic process		catalytic activity;metal ion binding;nucleotide binding	Pf00180	3644934		Biosynthesis of antibiotics; Biosynthesis of secondary metabolites; 2-Oxocarboxylic acid metabolism; Glutathione metabolism; Carbon metabolism; Citrate cycle (TCA cycle); Metabolic pathways; Peroxisome; Biosynthesis of amino acids	-1.59382	-2.90639	2.1437	3.90911	-0.672492	-1.53923	1.10011	1.96684	0.627422	0.34407	2.1437	3.90911	0.154215	0.228312	0.563479	0.115296	0.0518544	0.175712	0.309943	0.113385	2.52013e+06	1.58118e+06	9.85146e+06	3.38959e+06
TWF1; CAALFM_C206770WA	A0A1D8PHR2	Uncharacterized protein OS=Candida albicans (strain SC5314 / ATCC MYA-2876) OX=237561 GN=orf19.2228 PE=4 SV=1	26	283	0.514778	209	7	7	0		406	45.5	5.12	1476	14338	80.84	0	33.597	cell organization and biogenesis;regulation of biological process		protein binding	Pf00241	3643515			-3.42552	-4.08922	21.7029	25.9078	-1.77632	-2.03183	4.43981	4.69532	0.291926	0.244545	21.7029	25.9078	0.154334	0.0749289	0.00963651	0.0156424	0.137073	0.0761213	0.0213921	0.0367229	1.2074e+06	352472	3.12811e+07	7.64965e+06
CaJ7_0309; TOM22	Q59LZ9	Tom22p OS=Candida albicans (strain SC5314 / ATCC MYA-2876) OX=237561 GN=TOM22 PE=4 SV=1	10	395	0.32	48	1	1	0		150	16.6	4.2	484	3580.81	19.47	0	9.052	transport	membrane		Pf04281	3647650	W5Q_05306; I503_05264		-7.46162	-1.41568	358.807	68.0758	-2.89949	-0.501495	8.48706	6.08907	0.134019	0.706374	358.807	68.0758	0.15446	1	0.00973131	0.0138004	0.223928	0.513307	0.0412951	0.0420157	186802	25035	1.27167e+07	8.98273e+06
CaO19.10393; CaO19.2875; CAALFM_C406590WA	Q5A1E4	Uncharacterized protein OS=Candida albicans (strain SC5314 / ATCC MYA-2876) OX=237561 GN=orf19.2875 PE=4 SV=1	6	915	0.0328467	9	1	1	0		274	32.7	7.27	30	482.45	0	0.01	3.31				Pf00226	3642778	W5Q_03946; I503_03971		-17.8029	-3.11316	115.062	20.1206	-4.15404	-1.63838	6.84627	4.3306	0.0561706	0.321217	115.062	20.1206	0.154853	0.0503552	0.0187066	0.00383911	0.321632	0.0412504	0.0640352	0.00831284	29596.8	1662.47	595507	191287
RPL20; RPL20B	A0A1D8PLC9	60S ribosomal protein L20 OS=Candida albicans (strain SC5314 / ATCC MYA-2876) OX=237561 GN=RPL20B PE=3 SV=1	12	761	0.0697674	12	2	2	0		172	20.3	10.24	87	578.03	0	0.002	5.592	metabolic process	cell surface;ribosome	structural molecule activity	Pf01775	3635615	W5Q_03455; I503_03455	Ribosome	8.33558	-2.50441	-4.77782	4.3693	3.05928	-1.32447	-2.25635	2.1274	8.33558	0.399295	0.2093	4.3693	0.155736	0.901012	0.26223	0.452303	0.238221	0.596683	0.295841	0.481115	63336.9	527950	276738	110500
CaO19.6758; CAALFM_C307330WA; CaO19.14050	Q5ADT3	Uncharacterized protein OS=Candida albicans (strain SC5314 / ATCC MYA-2876) OX=237561 GN=orf19.6758 PE=4 SV=1	17	656	0.114187	33	3	3	0		289	32.6	6.28	67	1788.78	10.5	0	10.402	metabolic process		catalytic activity	Pf00248	3638478	W5Q_03242; I503_03243		-13.4957	-3.25801	517.418	124.911	-3.75442	-1.70399	9.01519	6.96475	0.0740979	0.306936	517.418	124.911	0.156288	0.432132	0.0303017	0.0601174	0.293386	0.368175	0.136588	0.209351	22436.1	1662.47	2.80251e+06	860191
CaO19.6724; FUM12	A0A1D8PKV4	Fum12p OS=Candida albicans (strain SC5314 / ATCC MYA-2876) OX=237561 GN=FUM12 PE=3 SV=1	33	314	0.445098	227	12	12	0		510	55.2	7.53	2208	18926.3	107.02	0	66.949	metabolic process		catalytic activity	Pf00206, Pf10415	3638489		Carbon metabolism; Metabolic pathways; Biosynthesis of secondary metabolites; Biosynthesis of antibiotics; Citrate cycle (TCA cycle); Pyruvate metabolism	-2.88336	-9.42427	3.86944	12.6473	-1.52775	-3.23638	1.95213	3.66075	0.346817	0.106109	3.86944	12.6473	0.156305	0.238121	0.232778	0.203199	0.119398	0.385326	0.227206	0.37193	1.23905e+07	4.29724e+06	1.56706e+08	1.66279e+07
FMP35; CAALFM_C404130WA	Q5A5V4	Uncharacterized protein OS=Candida albicans (strain SC5314 / ATCC MYA-2876) OX=237561 GN=orf19.5296 PE=4 SV=1	20	799	0.0590909	13	3	3	0		220	25	9.89	25	531.26	0	0	9.019		membrane		Pf08695	3641221			-13.3641	-1.0922	270.538	22.1101	-3.74029	-0.127241	8.07968	4.46663	0.0748273	0.915581	270.538	22.1101	0.156402	1	0.0227597	0.114047	0.292494	0.923726	0.0919456	0.254704	22217.4	1662.47	491229	449760
SNF12; CAALFM_C207100WA	A0A1D8PHT4	Uncharacterized protein OS=Candida albicans (strain SC5314 / ATCC MYA-2876) OX=237561 GN=orf19.2265 PE=4 SV=1	4	1013	0.0149254	7	1	1	0		469	53.6	5.33	37	332.18	1.94	0.001	5.837			protein binding		3643504			-16.7455	-1.00279	193.005	11.558	-4.0657	-0.00402131	7.5925	3.53082	0.0597177	0.997217	193.005	11.558	0.156451	1	0.0518264	0.222415	0.318042	0.998181	0.196746	0.392654	27838.8	1662.47	321761	320865
MRPL3	Q5A798	Mitochondrial 54S ribosomal protein YmL3 OS=Candida albicans (strain SC5314 / ATCC MYA-2876) OX=237561 GN=MRPL3 PE=4 SV=1	7	851	0.0445545	18	2	2	0		404	45	8.31	51	935.72	0	0	7.445	metabolic process	ribosome	catalytic activity;RNA binding	Pf00035, Pf00636	3640722	W5Q_00762; I503_00770		-5.89643	-2.37585	6.99139	2.81705	-2.55984	-1.24844	2.80558	1.49418	0.169594	0.420902	6.99139	2.81705	0.157515	0.683673	0.156524	0.492871	0.201607	0.426764	0.21957	0.36822	449506	76233.6	1.26628e+06	532979
CDC31; CAALFM_CR04020CA	A0A1D8PSM8	Centrin OS=Candida albicans (strain SC5314 / ATCC MYA-2876) OX=237561 GN=CAALFM_CR04020CA PE=4 SV=1	12	850	0.0447761	9	1	1	0		201	23	4.64	59	630.77	3.01	0	6.325			metal ion binding	Pf00036, Pf13405, Pf13499, Pf13833	3640969	W5Q_05833; I503_05815		-16.0302	-6.12988	173.496	66.3444	-4.00272	-2.61586	7.43876	6.0519	0.0623824	0.163135	173.496	66.3444	0.157554	0.0542219	0.00440117	0.0146559	0.315323	0.0709184	0.0163696	0.0443481	26649.6	1662.47	1.76805e+06	288432
URA6	Q59KZ3	Uridylate kinase OS=Candida albicans (strain SC5314 / ATCC MYA-2876) OX=237561 GN=URA6 PE=3 SV=1	27	285	0.508961	142	6	6	0		279	30.8	9.51	885	7695.96	23.44	0	27.621	cell organization and biogenesis;metabolic process;transport	cytoplasm;nucleus	catalytic activity;nucleotide binding	Pf00406, Pf00448, Pf02223, Pf06414, Pf13207, Pf13238, Pf13671	3647988	W5Q_00432; I503_00435	Metabolic pathways; Pyrimidine metabolism	-1.90252	-1.66478	49.4628	43.2817	-0.927914	-0.735329	5.62827	5.43569	0.525618	0.600681	49.4628	43.2817	0.158021	1	0.00245765	0.0456019	0.0733151	0.481995	0.00691617	0.123939	1.06955e+06	562176	4.62921e+07	2.78068e+07
CaO19.6387; HSP104	A0A1D8PTP9	Chaperone ATPase OS=Candida albicans (strain SC5314 / ATCC MYA-2876) OX=237561 GN=HSP104 PE=1 SV=1	19	362	0.365962	329	15	15	0	Acetyl [N-Term]	899	99.9	5.57	2478	29305.3	220.07	0	93.843	metabolic process;response to stimulus	cell surface	catalytic activity;nucleotide binding	Pf00004, Pf01078, Pf02861, Pf07724, Pf07728, Pf10431, Pf13191, Pf13401	3642097			-3.71582	-1.57297	21.4194	9.06719	-1.89368	-0.653489	4.42085	3.18066	0.26912	0.635741	21.4194	9.06719	0.158633	1	0.00928706	0.0529554	0.1502	0.434225	0.0205283	0.0842165	8.86991e+06	2.38707e+06	8.04251e+07	5.11296e+07
CaO19.6843; CAALFM_C104490WA	A0A1D8PDB1	Uncharacterized protein OS=Candida albicans (strain SC5314 / ATCC MYA-2876) OX=237561 GN=orf19.6843 PE=4 SV=1	4	755	0.0723861	27	1	1	0		373	42.1	4.51	267	2113.68	7	0	8.191			protein binding	Pf10516	3646145			-14.8848	-6.78118	174.725	79.6009	-3.89577	-2.76154	7.44894	6.31471	0.0671826	0.147467	174.725	79.6009	0.159342	0.00740918	0.0121258	0.00168874	0.310379	0.0102304	0.0451623	0.00533196	24745.5	1662.47	1.96977e+06	290475
CDC37	Q8X1E6	Hsp90 co-chaperone Cdc37 OS=Candida albicans (strain SC5314 / ATCC MYA-2876) OX=237561 GN=CDC37 PE=3 SV=1	10	883	0.0374016	19	4	4	0		508	58.5	4.81	105	1181.66	4.97	0	14.455	cell division;response to stimulus	cytoplasm	protein binding	Pf03234, Pf08564, Pf08565	3639210	I503_04820		-2.53893	-20.1911	2.90027	23.0647	-1.34422	-4.33565	1.53619	4.52762	0.393866	0.0495267	2.90027	23.0647	0.161592	0.153875	0.132001	0.146124	0.108608	0.333574	0.101389	0.330797	337573	132959	7.78603e+06	385616
CaO19.9888; CaO19.2352; CAALFM_C110690WA	Q59WE9	Uncharacterized protein OS=Candida albicans (strain SC5314 / ATCC MYA-2876) OX=237561 GN=orf19.2352 PE=4 SV=1	15	778	0.0648148	21	3	3	0		324	36.6	7.55	116	838.32	1.89	0	10.874			catalytic activity	Pf00561, Pf07819, Pf12146, Pf12695, Pf12697	3644443			-12.6468	-2.61993	388.031	80.3851	-3.6607	-1.38953	8.60003	6.32886	0.0790715	0.38169	388.031	80.3851	0.16275	0.406985	0.0139736	0.0338314	0.297889	0.282758	0.0600866	0.107057	21024.9	1662.47	1.69009e+06	645090
DOA1	A0A1D8PEM3	Doa1p OS=Candida albicans (strain SC5314 / ATCC MYA-2876) OX=237561 GN=DOA1 PE=4 SV=1	9	914	0.0328515	25	4	4	0		761	84.3	5.14	156	1299.58	5.33	0	15.173	metabolic process;regulation of biological process		catalytic activity;protein binding	Pf00400, Pf08324, Pf09070	3634871	W5Q_00932	Protein processing in endoplasmic reticulum	2.55061	-10.6193	-1.18354	22.8853	1.35084	-3.40862	-0.243109	4.51635	2.55061	0.094168	0.844923	22.8853	0.162769	0.233232	1	0.165202	0.109938	0.397499	0.836101	0.373055	179529	457907	4.10857e+06	386896
PUB1; CAALFM_C305880CA	A0A1D8PKD0	Uncharacterized protein OS=Candida albicans (strain SC5314 / ATCC MYA-2876) OX=237561 GN=orf19.7368 PE=4 SV=1	12	342	0.392157	200	4	4	0		510	56.6	5.78	1307	12370.3	56.27	0	29.582			RNA binding	Pf00076, Pf13893, Pf14259	3641737	W5Q_03095; I503_03089		-2.63792	-8.96757	2.01805	6.86034	-1.3994	-3.16472	1.01297	2.77828	0.379087	0.111513	2.01805	6.86034	0.163105	0.0769386	0.250023	0.0961856	0.114125	0.121744	0.126632	0.133615	7.61384e+06	2.8863e+06	5.22335e+07	5.82472e+06
CaO19.11696; CaO19.4220; CAALFM_C502140CA	Q5AGF9	Pyridoxal 5'-phosphate synthase OS=Candida albicans (strain SC5314 / ATCC MYA-2876) OX=237561 GN=orf19.4220 PE=4 SV=1	34	190	0.836066	153	4	4	0		183	20.8	6.39	1423	11310.4	57.68	0	27.366	metabolic process		catalytic activity;nucleotide binding	Pf01243	3637752	I503_04239		-4.77187	-1.20813	28.3406	7.17521	-2.25456	-0.272778	4.8248	2.84302	0.209561	0.827724	28.3406	7.17521	0.163246	1	0.000997122	0.0268543	0.184023	0.594137	0.00240546	0.0381736	1.24887e+06	261715	8.9609e+06	7.41715e+06
AVT11; CAALFM_C700230WA; CaJ7_0030	A0A1D8PQK4	Uncharacterized protein OS=Candida albicans (strain SC5314 / ATCC MYA-2876) OX=237561 GN=orf19.7100 PE=4 SV=1	9	964	0.0238095	14	3	3	0		588	64.4	7.34	47	644.32	0	0	11.153		membrane		Pf01490	3637982	W5Q_05078; I503_05034		-23.0832	-25.9805	21.4126	24.1001	-4.52877	-4.69935	4.42038	4.59097	0.0433215	0.0384905	21.4126	24.1001	0.164377	0.163749	0.17148	0.168218	0.372212	0.384758	0.379005	0.386141	84258.8	3650.22	2.03065e+06	78160.5
PSP1	A0A1D8PF34	Psp1p OS=Candida albicans (strain SC5314 / ATCC MYA-2876) OX=237561 GN=PSP1 PE=4 SV=1	3	760	0.0702541	47	1	1	0		669	76.3	8.4	202	3002.11	12.47	0	6.566			protein binding	Pf04468	3644551			-4.18704	-1.68905	6.16915	2.48863	-2.06593	-0.756209	2.62507	1.31535	0.238832	0.59205	6.16915	2.48863	0.164844	1	0.00862565	0.456742	0.170278	0.444944	0.0113215	0.300388	1.44943e+06	346170	3.60709e+06	2.13558e+06
CaO19.2913; SEC3	A0A1D8PMI1	GTP-Rho binding exocyst subunit OS=Candida albicans (strain SC5314 / ATCC MYA-2876) OX=237561 GN=SEC3 PE=4 SV=1	5	1066	0.00759494	6	2	2	0		790	88.1	8.75	30	322.51	0	0	7.097	response to stimulus;transport			Pf09763, Pf15277	3642806			-10.2774	-4.05159	88.196	34.7689	-3.3614	-2.01849	6.46264	5.11972	0.0973008	0.246817	88.196	34.7689	0.165482	0.393197	0.0136444	0.111907	0.278126	0.396832	0.0440894	0.286467	17085.9	1662.47	594057	146623
CaJ7_0011; CaO19.7116; CAALFM_C700070CA	A0A1D8PQH1	Uncharacterized protein OS=Candida albicans (strain SC5314 / ATCC MYA-2876) OX=237561 GN=orf19.7116 PE=4 SV=1	5	1078	0.00630915	2	1	1	0	Acetyl [N-Term]	317	37.2	4.97	34	281.15		0.002	4.72	cell organization and biogenesis;metabolic process			Pf04004	3638011	W5Q_05061; I503_05018		-9.60196	-1.98997	14.0619	2.91429	-3.26333	-0.99275	3.81372	1.54314	0.104145	0.502519	14.0619	2.91429	0.165808	1	0.196534	0.701227	0.270544	0.664089	0.374764	0.541047	15963	1662.47	46520.7	23377.5
SEC24	Q5AQ76	Protein transport protein SEC24 OS=Candida albicans (strain SC5314 / ATCC MYA-2876) OX=237561 GN=SEC24 PE=3 SV=2	10	950	0.0258621	24	5	5	0		928	102	5.4	90	1023.3	1.77	0	16.225	transport	cytoplasm;endoplasmic reticulum;Golgi;membrane	metal ion binding	Pf00626, Pf04810, Pf04811, Pf04815, Pf08033	3634939		Protein processing in endoplasmic reticulum	2.156	-4.19567	2.07352	18.7568	1.10836	-2.0689	1.05208	4.22934	2.156	0.238341	2.07352	18.7568	0.166589	0.242619	0.677069	0.0775237	0.0923202	0.250977	0.356167	0.163937	149075	321405	2.79617e+06	666442
RIB3	Q5A3V6	3,4-dihydroxy-2-butanone 4-phosphate synthase OS=Candida albicans (strain SC5314 / ATCC MYA-2876) OX=237561 GN=RIB3 PE=1 SV=2	17	325	0.416667	85	2	2	0		204	22.6	5.44	1044	7276.94	57.18	0	10.938	metabolic process		catalytic activity;metal ion binding	Pf00926	3642062		Metabolic pathways; Riboflavin metabolism; Biosynthesis of secondary metabolites	-3.9604	1.68754	52.87	7.91072	-1.98565	0.754922	5.72438	2.98381	0.2525	1.68754	52.87	7.91072	0.166999	0.44808	0.00396335	0.00556883	0.165801	0.169133	0.0113439	0.00830817	1.47012e+06	371204	1.16297e+07	1.96255e+07
PAB1; CAALFM_C103370WA	Q5AI15	Polyadenylate-binding protein, cytoplasmic and nuclear OS=Candida albicans (strain SC5314 / ATCC MYA-2876) OX=237561 GN=PAB1 PE=3 SV=1	26	427	0.27663	174	13	13	0	Acetyl [N-Term]	629	70.4	5.29	1008	14132.3	97.87	0	88.306	metabolic process;regulation of biological process;transport	cytoplasm;nucleus	RNA binding	Pf00076, Pf00658, Pf09606, Pf09770, Pf12868, Pf13893, Pf14259	3636891		RNA degradation; RNA transport; mRNA surveillance pathway	-2.4189	-4.91477	1.73263	3.5204	-1.27435	-2.29712	0.792964	1.81574	0.413411	0.203468	1.73263	3.5204	0.168992	0.280763	0.800953	0.405802	0.107677	0.322474	0.317564	0.368415	8.05473e+06	3.32992e+06	2.83559e+07	5.76952e+06
SOD1	A0A1D8PLJ3	Superoxide dismutase [Cu-Zn] OS=Candida albicans (strain SC5314 / ATCC MYA-2876) OX=237561 GN=SOD1 PE=3 SV=1	29	430	0.272727	42	2	2	0		154	16.1	6.13	359	3329.19	19.13	0	10.748	metabolic process;response to stimulus		antioxidant activity;catalytic activity;metal ion binding	Pf00080	30515248	W5Q_03532; I503_03524		-2.30882	-1.44292	4.37161	2.73207	-1.20716	-0.52899	2.12816	1.45	0.433121	0.69304	4.37161	2.73207	0.169322	1	0.0167365	0.366013	0.102199	0.572015	0.017809	0.265359	2.17779e+06	943246	5.94987e+06	4.1235e+06
GDH2	A0A1D8PI00	NAD-specific glutamate dehydrogenase OS=Candida albicans (strain SC5314 / ATCC MYA-2876) OX=237561 GN=GDH2 PE=3 SV=1	5	937	0.0284091	30	3	3	0		1056	119.7	6.06	239	2336.91	15.14	0	11.744	metabolic process		catalytic activity	Pf00208, Pf02812, Pf05088	3642295	W5Q_02213; I503_02224	Alanine, aspartate and glutamate metabolism; Nitrogen metabolism; Metabolic pathways; Arginine biosynthesis; Taurine and hypotaurine metabolism	-3.5797	-9.03208	10.0203	25.2827	-1.83984	-3.17506	3.32486	4.66008	0.279353	0.110717	10.0203	25.2827	0.169828	0.100027	0.0441885	0.0576728	0.156228	0.158795	0.0734602	0.13438	186591	52124.7	4.71751e+06	522307
MEU1	Q59ST1	S-methyl-5'-thioadenosine phosphorylase OS=Candida albicans (strain SC5314 / ATCC MYA-2876) OX=237561 GN=MEU1 PE=3 SV=1	24	315	0.44186	152	4	4	0		344	37.6	7.62	1030	8287.5	14.69	0	24.798	metabolic process	cytoplasm;nucleus	catalytic activity	Pf01048	3645635	W5Q_02892; I503_02886	Metabolic pathways; Cysteine and methionine metabolism	-3.78778	-1.12594	9.4667	2.81404	-1.92135	-0.171132	3.24286	1.49264	0.264007	0.888145	9.4667	2.81404	0.170847	1	0.000828064	0.053901	0.164129	0.569643	0.00134265	0.0402275	3.36682e+06	888862	9.47435e+06	8.4146e+06
CaO19.11069; CaO19.3585; CAALFM_C208840WA	Q59Y64	RNA methylation protein OS=Candida albicans (strain SC5314 / ATCC MYA-2876) OX=237561 GN=orf19.3585 PE=4 SV=1	20	654	0.115385	15	2	2	0		130	15	4.97	102	1141.24	9.33	0	6.839	metabolic process			Pf03966	3643891	W5Q_02303; I503_02311		-3.93849	-4.52573	11.5911	13.3193	-1.97764	-2.17815	3.53494	3.73545	0.253904	0.220959	11.5911	13.3193	0.171608	0.286072	0.0308146	0.128206	0.16969	0.311554	0.0544639	0.239454	266459	67655.1	3.54906e+06	784196
CaO19.5773; CAALFM_C603960WA	A0A1D8PQB4	Dipeptidyl peptidase 3 OS=Candida albicans (strain SC5314 / ATCC MYA-2876) OX=237561 GN=orf19.5773 PE=3 SV=1	13	744	0.0771429	54	5	5	0		700	79.8	5.48	278	3092.41	22.59	0	20.323	metabolic process	cytoplasm	catalytic activity;metal ion binding	Pf03571	3640269			-3.33781	-5.83422	4.4853	7.83993	-1.7389	-2.54454	2.16521	2.97084	0.299597	0.171403	4.4853	7.83993	0.173857	0.191901	0.0623545	0.150805	0.15116	0.244149	0.0675051	0.224009	1.06591e+06	319345	8.3567e+06	1.43236e+06
YST1	O42817	40S ribosomal protein S0 OS=Candida albicans (strain SC5314 / ATCC MYA-2876) OX=237561 GN=RPS0 PE=2 SV=2	15	599	0.141762	37	3	3	0	Acetyl [N-Term]	261	28.7	4.91	290	2089.23	0	0	11.899	metabolic process	cytoplasm;membrane;ribosome	structural molecule activity	Pf00318	3643678	W5Q_03046; I503_03040	Ribosome	-2.44156	-1.67149	-2.56712	-3.74983	-1.2878	-0.741132	-1.36015	-1.90682	0.409574	0.59827	0.389541	0.266679	0.175715	1	0.162366	0.0702872	0.113143	0.445218	0.110422	0.0670127	4.00131e+06	1.63884e+06	1.06707e+06	638393
CaO19.6853; CAALFM_C104600CA	A0A1D8PDC7	Uncharacterized protein OS=Candida albicans (strain SC5314 / ATCC MYA-2876) OX=237561 GN=orf19.6853 PE=4 SV=1	5	742	0.0782609	27	2	2	0		345	39.2	10.58	123	1329.13	1.76	0.002	5.015					3646133			-9.86267	-1.40103	3.13152	-2.24797	-3.30198	-0.48649	1.64687	-1.16862	0.101392	0.713759	3.13152	0.444846	0.177478	1	0.0768919	0.857365	0.293014	0.416651	0.0633153	0.500968	5.71112e+06	579065	2.54057e+06	1.81336e+06
ULA1; CAALFM_C501590WA	A0A1D8PN68	NEDD8-activating enzyme E1 regulatory subunit OS=Candida albicans (strain SC5314 / ATCC MYA-2876) OX=237561 GN=orf19.4153 PE=3 SV=1	7	661	0.11257	60	3	3	0		533	60.9	5.71	361	3029.68	13.77	0	12.26	metabolic process		catalytic activity	Pf00899	3647041			-7.13778	1.12564	30.182	3.75651	-2.83548	0.170746	4.91561	1.90939	0.1401	1.12564	30.182	3.75651	0.179411	1	0.0146096	0.174137	0.254358	0.824407	0.0359077	0.166248	758641	106285	2.84984e+06	3.2079e+06
SHP1	A0A1D8PS15	Protein phosphatase regulator OS=Candida albicans (strain SC5314 / ATCC MYA-2876) OX=237561 GN=SHP1 PE=4 SV=1	47	293	0.490566	182	9	9	0	Acetyl [N-Term]	371	41.4	5.08	1391	13503.9	42.56	0	46.892	regulation of biological process		enzyme regulator activity;protein binding	Pf00789, Pf08059, Pf14555	3640083			-2.11737	-2.07952	8.6147	8.46072	-1.08227	-1.05625	3.1068	3.08078	0.472284	0.480879	8.6147	8.46072	0.181465	0.69301	0.00310817	0.101049	0.0981976	0.365997	0.00482823	0.155655	7.59426e+06	3.58664e+06	6.42529e+07	3.08979e+07
GLK1; GLK3	Q59TZ8	Phosphotransferase OS=Candida albicans (strain SC5314 / ATCC MYA-2876) OX=237561 GN=GLK1 PE=3 SV=1	48	200	0.807203	381	15	15	0		472	52.1	6.3	2062	23262.2	101.37	0	79.857	cellular homeostasis;metabolic process		catalytic activity;enzyme regulator activity;nucleotide binding	Pf00349, Pf03727	3648348		Amino sugar and nucleotide sugar metabolism; Fructose and mannose metabolism; Biosynthesis of antibiotics; Glycolysis / Gluconeogenesis; Galactose metabolism; Carbon metabolism; Biosynthesis of secondary metabolites; Starch and sucrose metabolism; Metabolic pathways	-3.28584	-2.9436	7.19189	6.4428	-1.71626	-1.55758	2.84637	2.68769	0.304336	0.339721	7.19189	6.4428	0.182929	0.179312	0.0461021	0.0525731	0.156977	0.139646	0.0656118	0.07065	1.27612e+07	3.8837e+06	8.22178e+07	2.79311e+07
TYS1	Q5AFB3	Tyrosine--tRNA ligase OS=Candida albicans (strain SC5314 / ATCC MYA-2876) OX=237561 GN=TYS1 PE=3 SV=1	9	759	0.0709046	29	4	4	0		409	45	7.03	187	1565.2	4.02	0	14.246	metabolic process	cytoplasm	catalytic activity;nucleotide binding	Pf00579	3637870	I503_03597	Aminoacyl-tRNA biosynthesis	-3.98923	-3.10169	10.7084	8.32598	-1.99611	-1.63305	3.42068	3.05762	0.250675	0.322405	10.7084	8.32598	0.183501	0.57684	0.151013	0.226352	0.183144	0.471005	0.258283	0.34605	450878	113024	3.754e+06	1.21031e+06
PAN1	Q5AHB1	Actin cytoskeleton-regulatory complex protein PAN1 OS=Candida albicans (strain SC5314 / ATCC MYA-2876) OX=237561 GN=PAN1 PE=3 SV=2	15	593	0.145415	203	16	16	0		1396	152.3	6.23	1037	10743.8	36.74	0	67.996	cell growth;cell organization and biogenesis;transport	cytoplasm;cytoskeleton;endosome;membrane	metal ion binding;protein binding	Pf08226, Pf12763	3637386			-2.13876	-8.9105	6.9988	29.1583	-1.09678	-3.15551	2.80711	4.86584	0.46756	0.112227	6.9988	29.1583	0.185441	0.146559	0.0163014	0.0819856	0.101694	0.231234	0.0228798	0.199464	2.13078e+06	996268	6.213e+07	6.97268e+06
MRPL12; CAALFM_C207190CA	Q59Z25	Mitochondrial nucleoid protein OS=Candida albicans (strain SC5314 / ATCC MYA-2876) OX=237561 GN=orf19.2275 PE=3 SV=1	59	151	1.10345	192	7	7	0		174	18.7	8.25	1726	15808.5	105.75	0	52.491	metabolic process	ribosome	structural molecule activity	Pf00542	3643513	W5Q_02139; I503_02155	Ribosome	-4.6323	-2.29635	57.7181	28.6123	-2.21173	-1.19934	5.85095	4.83856	0.215876	0.435474	57.7181	28.6123	0.186269	0.469872	0.00593569	0.0388401	0.205988	0.281768	0.0173647	0.093965	2.32858e+06	502684	6.66261e+07	2.9014e+07
CaO19.5783; CAALFM_C203130WA	A0A1D8PGT0	Protein-arginine N-methyltransferase OS=Candida albicans (strain SC5314 / ATCC MYA-2876) OX=237561 GN=orf19.5783 PE=4 SV=1	7	602	0.140777	29	1	1	0		206	23.6	4.74	136	1254.5	2.03	0.003	4.481	metabolic process		catalytic activity	Pf04252	3642993	I503_01758		-12.2177	-1.97589	74.2506	12.0081	-3.6109	-0.982503	6.21433	3.58594	0.0818486	0.506101	74.2506	12.0081	0.187158	0.565632	0.000452544	0.0451477	0.337904	0.277867	0.00140613	0.0809484	91036.1	7451.18	1.09317e+06	553255
RPS10	A0A1D8PI15	Ribosomal 40S subunit protein S10A OS=Candida albicans (strain SC5314 / ATCC MYA-2876) OX=237561 GN=RPS10 PE=4 SV=1	24	443	0.254237	30	2	2	0		118	13.8	9.83	73	1654.89	5.47	0	7.214		cell surface		Pf03501	30515149	W5Q_02226; I503_02237		2.65728	-1.34942	-7.34028	-2.04706	1.40995	-0.432337	-2.87584	-1.03355	2.65728	0.74106	0.136235	0.488507	0.188631	1	0.00518424	1	0.13298	0.789322	0.0074545	0.589237	551934	1.46664e+06	269623	199807
CaO19.4584; PHO114; CaO19.12053	Q5AMR2	Pho114p OS=Candida albicans (strain SC5314 / ATCC MYA-2876) OX=237561 GN=PHO114 PE=3 SV=1	18	715	0.0899123	41	4	4	0		456	52.1	5.33	166	2627.8	11.93	0	19.366	metabolic process		catalytic activity	Pf00328	3635644	W5Q_03507; I503_03499		-3.36062	-7.38831	-3.27249	-1.48852	-1.74873	-2.88524	-1.71039	-0.573874	0.297564	0.135349	0.305577	0.67181	0.188743	0.0212652	0.0303787	1	0.165031	0.0306776	0.0259797	0.503067	2.46939e+06	734802	1.65896e+06	224539
YIM1	Q5AHE9	Yim1p OS=Candida albicans (strain SC5314 / ATCC MYA-2876) OX=237561 GN=YIM1 PE=4 SV=1	17	500	0.207182	75	5	5	0		362	39.7	7.5	170	4169.65	19.35	0	17.437	metabolic process	membrane	catalytic activity	Pf00107, Pf08240, Pf13602	3637372	W5Q_01807; I503_01823		-2.68283	1.20138	32.6378	10.1262	-1.42376	0.264689	5.02847	3.34003	0.372741	1.20138	32.6378	10.1262	0.190633	1	0.00940229	0.150243	0.135707	0.800733	0.0236396	0.250908	636748	237342	6.44786e+06	7.74631e+06
RPN2	Q5A3L0	26S proteasome regulatory subunit RPN2 OS=Candida albicans (strain SC5314 / ATCC MYA-2876) OX=237561 GN=RPN2 PE=3 SV=1	5	975	0.0220588	21	3	3	0	Acetyl [N-Term]	952	104.7	5.63	120	1582.01	5.94	0	11.57	regulation of biological process	proteasome	enzyme regulator activity	Pf01851, Pf13646	3642027	W5Q_01165	Proteasome	-7.4712	-4.26035	10.3573	5.90613	-2.90134	-2.09097	3.37258	2.56221	0.133847	0.234723	10.3573	5.90613	0.195053	0.367772	0.0125064	0.275546	0.282957	0.3845	0.0210895	0.353004	673392	90131.6	3.97714e+06	933524
SEC14	P46250	SEC14 cytosolic factor OS=Candida albicans (strain SC5314 / ATCC MYA-2876) OX=237561 GN=SEC14 PE=2 SV=1	31	453	0.242525	73	8	8	0		301	34.7	6.4	406	4371.06	17.79	0	24.993	metabolic process;transport	Golgi;membrane	transporter activity	Pf00650, Pf03765, Pf13716	3641542	W5Q_04086; I503_04084		-1.70235	-6.05345	7.00369	24.9047	-0.767528	-2.59776	2.80812	4.63835	0.587423	0.165195	7.00369	24.9047	0.195861	0.215422	0.0636685	0.0960081	0.0751646	0.279807	0.0893942	0.222659	365040	214433	9.09121e+06	1.50182e+06
ATP7	Q59PV8	ATP synthase subunit d, mitochondrial OS=Candida albicans (strain SC5314 / ATCC MYA-2876) OX=237561 GN=ATP7 PE=3 SV=1	44	539	0.178161	31	5	5	0		174	19.4	6.61	122	1576.51	3.04	0	13.787	metabolic process;transport	membrane;mitochondrion	transporter activity	Pf05873	3646672	W5Q_00736; I503_00740	Metabolic pathways; Oxidative phosphorylation	2.05198	-2.2976	1.70366	8.0321	1.03702	-1.20013	0.768635	3.00578	2.05198	0.435237	1.70366	8.0321	0.195906	0.960593	1	0.255161	0.101579	0.576416	0.525789	0.383478	509679	1.04585e+06	4.0938e+06	1.78177e+06
CaO19.3219; CAALFM_C503930CA	A0A1D8PNT7	Uncharacterized protein OS=Candida albicans (strain SC5314 / ATCC MYA-2876) OX=237561 GN=orf19.3219 PE=4 SV=1	4	1050	0.00998336	6	2	2	0		601	68.8	6.9	50	282.23	1.75	0.002	5.494		membrane	catalytic activity	Pf00149	3647447			-2.99685	-48.7237	-2.09154	7.77335	-1.58345	-5.60655	-1.06457	2.95854	0.333683	0.0205239	0.478116	7.77335	0.195937	0.135971	1	0.291516	0.155128	0.381164	0.633073	0.43123	68912.9	22995.1	535684	10994.3
GSP1	Q59P43	GTP-binding nuclear protein OS=Candida albicans (strain SC5314 / ATCC MYA-2876) OX=237561 GN=GSP1 PE=3 SV=1	25	330	0.406542	87	3	3	0		214	24.3	7.02	407	7414.16	29.08	0	21.989	cell organization and biogenesis;regulation of biological process;response to stimulus;transport	nucleus	catalytic activity;nucleotide binding	Pf00025, Pf00071, Pf04670, Pf08477	3646925	W5Q_02058; I503_02073	Ribosome biogenesis in eukaryotes; RNA transport	-2.55184	1.06934	4.47339	1.63934	-1.35154	0.096715	2.16137	0.713119	0.391875	1.06934	4.47339	1.63934	0.196372	1	0.0218772	0.992191	0.132702	0.868417	0.0236424	0.353775	3.31999e+06	1.30102e+06	5.44261e+06	5.81998e+06
CaO19.3003; CAALFM_C103100WA	A0A1D8PCX0	Uncharacterized protein OS=Candida albicans (strain SC5314 / ATCC MYA-2876) OX=237561 GN=orf19.3003 PE=4 SV=1	6	844	0.0465773	66	6	6	0		1417	158.3	5.86	392	3062.07	2.34	0	20.381		membrane	protein binding	Pf00168	3636925	W5Q_00300		-3.17174	-4.82247	6.73944	10.247	-1.66528	-2.26977	2.75263	3.35712	0.315284	0.207363	6.73944	10.247	0.196425	0.313896	0.120595	0.177371	0.163551	0.356236	0.165977	0.297729	1.05833e+06	333673	1.08446e+07	2.24877e+06
CAALFM_C111320CA	A0A1D8PF49	Uncharacterized protein OS=Candida albicans (strain SC5314 / ATCC MYA-2876) OX=237561 GN=orf19.670.2 PE=4 SV=1	34	546	0.171053	13	2	2	0		76	8.4	6.87	87	839.94	1.89	0	12.109					30515052	W5Q_01095; I503_01105		-3.20917	-545.181	-1.27488	133.253	-1.6822	-9.09059	-0.35036	7.05803	0.311607	0.00183425	0.784388	133.253	0.197744	0.0823778	1	0.106794	0.166323	0.374431	0.793935	0.376878	31459.9	9803.11	4.19214e+06	7689.44
TOM71; CaJ7_0305; TOM70	Q59LZ5	Protein channel OS=Candida albicans (strain SC5314 / ATCC MYA-2876) OX=237561 GN=TOM70 PE=4 SV=1	11	696	0.0969793	61	4	4	0		629	69.6	5.35	384	3863.98	10.05	0	18.573		membrane	protein binding	Pf13414, Pf13432	3647645	W5Q_05302; I503_05260		-4.33741	1.59766	10.045	1.44955	-2.11684	0.675959	3.3284	0.535609	0.230552	1.59766	10.045	1.44955	0.19778	1	0.0196258	1	0.209334	0.385201	0.0326613	0.602373	1.02946e+06	237345	1.49226e+06	2.38412e+06
HRT2	A0A1D8PLC6	Putative methyltransferase OS=Candida albicans (strain SC5314 / ATCC MYA-2876) OX=237561 GN=HRT2 PE=4 SV=1	16	728	0.0862832	39	5	5	0		452	52.7	5.17	116	1591.52	7	0	11.922	metabolic process		catalytic activity	Pf01937	3635709			-2.60512	-8.61668	3.631	12.0099	-1.38135	-3.10713	1.86037	3.58615	0.38386	0.116054	3.631	12.0099	0.197825	0.137431	0.00155548	0.111788	0.136633	0.213508	0.00144688	0.200445	606039	232634	7.27847e+06	844696
DEP1; CAALFM_C204130WA	A0A1D8PH30	Rpd3L histone deacetylase complex subunit OS=Candida albicans (strain SC5314 / ATCC MYA-2876) OX=237561 GN=orf19.808 PE=4 SV=1	2	1088	0.00491803	3	1	1	0		610	68	4.41	55	181.77	0	0.007	3.586				Pf08598	3637334	W5Q_01844		-3.15035	-31.6861	3.4256	34.4546	-1.65551	-4.98578	1.77636	5.10662	0.317425	0.0315596	3.4256	34.4546	0.199501	0.153516	0.426766	0.149411	0.165138	0.382697	0.379044	0.381493	5237.36	1662.47	180451	5694.95
SAP6	Q5AC08	Candidapepsin-6 OS=Candida albicans (strain SC5314 / ATCC MYA-2876) OX=237561 GN=SAP6 PE=1 SV=1	71	47	3.20335	1339	26	25	0		418	45.4	8.03	11041	106155	707.66	0	192.045	metabolic process;regulation of biological process;response to stimulus	extracellular	catalytic activity	Pf00026	3639229			-3.29194	-4.36089	-1.72419	-1.30156	-1.71894	-2.12462	-0.785921	-0.38024	0.303772	0.229311	0.579981	0.76831	0.200967	0.259167	0.620526	1	0.172725	0.275316	0.243842	0.728661	4.69148e+08	1.42514e+08	3.60451e+08	8.26554e+07
SHO1; SSU81	Q5AQ36	High osmolarity signaling protein SHO1 OS=Candida albicans (strain SC5314 / ATCC MYA-2876) OX=237561 GN=SHO1 PE=2 SV=2	12	530	0.18299	71	4	4	0		388	41	6.04	483	5964.59	45.23	0	21.502	cell organization and biogenesis;regulation of biological process;response to stimulus	membrane	protein binding	Pf00018, Pf07653, Pf14604	3634944		MAPK signaling pathway - yeast	-1.8315	-1.75261	1.49114	1.42691	-0.873024	-0.809501	0.576417	0.512894	0.546001	0.570579	1.49114	1.42691	0.201033	0.85551	1	1	0.0877533	0.346268	0.323284	0.488631	2.24869e+06	1.22779e+06	3.20868e+06	1.8308e+06
SKN1	A0A1D8PKE1	Skn1p OS=Candida albicans (strain SC5314 / ATCC MYA-2876) OX=237561 GN=SKN1 PE=4 SV=1	12	689	0.101764	75	5	5	0		737	83.7	5.15	441	3999.12	23.21	0	20.313	metabolic process	membrane	catalytic activity	Pf03935	3641755	W5Q_03089; I503_03083		-2.06176	-1.00284	1.4695	-1.39907	-1.04388	-0.00408677	0.555324	-0.484466	0.485023	0.997171	1.4695	0.714762	0.2011	1	1	1	0.104962	0.997346	0.604873	0.577945	3.31911e+06	1.60985e+06	2.37238e+06	2.36567e+06
CaO19.12971; CaO19.5525; CAALFM_C602560WA	A0A1D8PPX6	Uncharacterized protein OS=Candida albicans (strain SC5314 / ATCC MYA-2876) OX=237561 GN=orf19.5525 PE=4 SV=1	11	706	0.0948276	33	2	2	0	Acetyl [N-Term]	348	37.7	5.77	219	4175.1	0	0	9.678	metabolic process		catalytic activity	Pf01408, Pf02894	3639205			-4.71324	1.05528	30.7465	6.18172	-2.23672	0.0776196	4.94235	2.62801	0.212168	1.05528	30.7465	6.18172	0.201292	1	0.010396	0.185819	0.225117	0.938716	0.0256904	0.244167	356312	75598	2.20262e+06	2.32437e+06
CaO19.7034; CAALFM_C700830CA	A0A1D8PQN6	Uncharacterized protein OS=Candida albicans (strain SC5314 / ATCC MYA-2876) OX=237561 GN=orf19.7034 PE=4 SV=1	1	1065	0.0078125	6	1	1	0		768	84.3	5.82	71	292.14	0	0.01	3.296					3637938	W5Q_05136; I503_05092		-2.37141	-1821.39	-15.6079	49.2098	-1.24574	-10.8308	-3.96421	5.62087	0.421691	0.000549032	0.06407	49.2098	0.204118	0.0690403	0.0251395	0.136087	0.127139	0.373881	0.049829	0.382465	72563.1	30599.2	3.57081e+06	1960.49
CAR1	A0A1D8PP00	Arginase OS=Candida albicans (strain SC5314 / ATCC MYA-2876) OX=237561 GN=CAR1 PE=3 SV=1	35	354	0.375394	119	9	9	0		317	34.3	5.25	524	6178.82	19.66	0	26.925	metabolic process		catalytic activity;metal ion binding	Pf00491	3636503	W5Q_04469; I503_04465	Metabolic pathways; Arginine biosynthesis; Biosynthesis of amino acids; Biosynthesis of secondary metabolites; Biosynthesis of antibiotics; Arginine and proline metabolism	-1.9296	-4.6315	1.6655	3.99761	-0.948298	-2.21148	0.735956	1.99914	0.518243	0.215913	1.6655	3.99761	0.204933	0.255982	0.489998	0.301896	0.0971687	0.283049	0.180309	0.301765	6.22959e+06	3.22844e+06	2.49034e+07	5.37697e+06
CaO19.94; CAALFM_C600930CA; CaO19.7740	Q59WV8	Uncharacterized protein OS=Candida albicans (strain SC5314 / ATCC MYA-2876) OX=237561 GN=orf19.94 PE=4 SV=1	27	751	0.0737705	18	5	5	0		244	26.4	7.62	136	1171.67	4.04	0	18.898		membrane			3644032	W5Q_04683; I503_04658		-3.13199	-40.0109	7.71606	98.5719	-1.64708	-5.32232	2.94786	6.6231	0.319286	0.0249932	7.71606	98.5719	0.205537	0.141803	0.290427	0.111954	0.169268	0.377362	0.428069	0.370741	191650	61191	1.88913e+07	472153
GFA1	P53704	Glutamine--fructose-6-phosphate aminotransferase [isomerizing] OS=Candida albicans (strain SC5314 / ATCC MYA-2876) OX=237561 GN=GFA1 PE=1 SV=3	4	953	0.0252454	18	2	2	0		713	79.2	6.24	113	995.46	5.48	0	6.341	metabolic process;response to stimulus		catalytic activity	Pf00310, Pf01380, Pf13230, Pf13522, Pf13537	3636557		Metabolic pathways; Biosynthesis of antibiotics; Alanine, aspartate and glutamate metabolism; Amino sugar and nucleotide sugar metabolism	-2.1428	-2.3759	-1.41196	-1.27344	-1.0995	-1.24847	-0.497701	-0.348727	0.466678	0.420893	0.708235	0.785277	0.20653	0.695968	1	1	0.11354	0.434449	0.658855	0.696685	890416	415538	699223	294298
SHS1; SEP7	Q59VX8	Septation protein 7 OS=Candida albicans (strain SC5314 / ATCC MYA-2876) OX=237561 GN=SEP7 PE=1 SV=1	10	824	0.0522388	35	6	6	0		670	75.8	6.02	302	2089.49	8.54	0	30.513	cell division	cytoskeleton	catalytic activity;nucleotide binding	Pf00735	3644596			-2.15862	-21.5702	3.27494	32.7253	-1.11011	-4.43097	1.71147	5.03233	0.46326	0.0463602	3.27494	32.7253	0.206997	0.172957	0.503597	0.149369	0.114894	0.383183	0.430945	0.375836	471753	218544	1.54383e+07	715720
CaO19.5626; CAALFM_C603370WA	A0A1D8PQ50	Uncharacterized protein OS=Candida albicans (strain SC5314 / ATCC MYA-2876) OX=237561 GN=orf19.5626 PE=4 SV=1	14	783	0.0635697	26	4	4	0		409	45.7	6.55	83	1403.09	0	0	15.408					3639230			-7.96961	-3.68186	94.9901	43.8843	-2.99451	-1.88044	6.56971	5.45563	0.125477	0.271601	94.9901	43.8843	0.209748	0.387281	0.00132453	0.0883965	0.314046	0.364129	0.0043509	0.241129	140557	17636.6	6.16825e+06	1.67531e+06
MED6; CAALFM_C306170CA; CAALFM_C306350WA	Q5A2Z1	Mediator of RNA polymerase II transcription subunit 6 OS=Candida albicans (strain SC5314 / ATCC MYA-2876) OX=237561 GN=MED6 PE=3 SV=1	23	685	0.102662	27	4	4	0		263	29.2	5.03	254	1995.85	4.39	0	17.456	metabolic process;regulation of biological process	nucleus		Pf04934	3642272; 30515215	W5Q_03126; I503_03120; I503_03146		-3.52908	-2.70926	22.3299	17.1426	-1.81929	-1.4379	4.48091	4.09951	0.28336	0.369105	22.3299	17.1426	0.209922	0.109113	0.000286681	0.0118842	0.190954	0.0784464	0.000642294	0.0243597	437439	123953	7.49883e+06	2.76785e+06
SIN3	A0A1D8PCC3	Transcriptional regulator OS=Candida albicans (strain SC5314 / ATCC MYA-2876) OX=237561 GN=SIN3 PE=4 SV=1	6	819	0.0545712	77	6	6	0		1411	159.9	5.48	95	2865.53	0	0	16.84	cell communication;regulation of biological process;response to stimulus	nucleus	DNA binding	Pf02671, Pf08295, Pf09770	3639282	W5Q_00087; I503_00090		-2.57301	-1.70653	10.2258	6.78221	-1.36346	-0.771065	3.35415	2.76176	0.38865	0.585985	10.2258	6.78221	0.212954	1	0.00353698	0.0817046	0.145177	0.389731	0.00593178	0.112824	975040	378949	6.61292e+06	3.87507e+06
ACC1	A0A1D8PRR7	Acetyl-CoA carboxylase OS=Candida albicans (strain SC5314 / ATCC MYA-2876) OX=237561 GN=ACC1 PE=4 SV=1	2	965	0.0237781	54	4	4	0		2271	253.3	6.4	283	3304.48	14.59	0	13.007	metabolic process		catalytic activity;metal ion binding;nucleotide binding	Pf00289, Pf00364, Pf01039, Pf02655, Pf02785, Pf02786, Pf08326, Pf13535, Pf15632	3639688	W5Q_05527; I503_05491	Metabolic pathways; Biosynthesis of secondary metabolites; Fatty acid biosynthesis; Pyruvate metabolism; Fatty acid metabolism; Propanoate metabolism	2.61006	-2.6006	-3.49647	1.9413	1.38408	-1.37884	-1.8059	0.957022	2.61006	0.384527	0.286002	1.9413	0.213436	0.785204	0.0452814	1	0.147706	0.541336	0.0408869	0.646974	1.22386e+06	3.19434e+06	2.37588e+06	913590
AGC1	Q5AL11	Amino acid transporter OS=Candida albicans (strain SC5314 / ATCC MYA-2876) OX=237561 GN=AGC1 PE=3 SV=1	8	788	0.0629275	46	4	4	0		731	81.9	8.63	297	2847.48	17.02	0	15.056	transport	membrane		Pf00153	3636219	I503_01325		-4.46287	1.3177	16.4641	2.79966	-2.15797	0.398027	4.04125	1.48525	0.224071	1.3177	16.4641	2.79966	0.214291	1	0.00752649	0.366888	0.231217	0.598449	0.0152082	0.27246	975522	218586	2.73113e+06	3.59882e+06
PHR1	P43076	pH-responsive protein 1 OS=Candida albicans (strain SC5314 / ATCC MYA-2876) OX=237561 GN=PHR1 PE=2 SV=4	32	67	2.28467	1252	16	15	1		548	59.4	5.07	11775	108569	783.32	0	138.358	cell organization and biogenesis;response to stimulus	cell surface;extracellular;membrane	catalytic activity	Pf03198, Pf07983	3641108			-2.615	-1.05601	2.30445	-1.07457	-1.38681	-0.0786275	1.20442	-0.103758	0.38241	0.946958	2.30445	0.930605	0.216353	1	0.319843	1	0.15002	0.934227	0.192613	0.910327	3.26702e+08	1.24934e+08	3.04031e+08	2.87905e+08
CaO19.1301; CAALFM_C403770WA	A0A1D8PLW9	Uncharacterized protein OS=Candida albicans (strain SC5314 / ATCC MYA-2876) OX=237561 GN=orf19.1301 PE=4 SV=1	74	115	1.4878	244	13	13	0	Acetyl [N-Term]	164	19.1	4.45	1387	16230.3	47.74	0	53.598					3645354			-5.77003	-1.93661	20.2549	6.79821	-2.52858	-0.953534	4.3402	2.76516	0.173309	0.516366	20.2549	6.79821	0.221003	0.9449	0.00444602	0.154606	0.279412	0.450497	0.00964831	0.213755	1.29889e+07	2.2511e+06	8.83014e+07	4.55959e+07
RPL15; RPL15A	Q5A6R1	Ribosomal protein L15 OS=Candida albicans (strain SC5314 / ATCC MYA-2876) OX=237561 GN=RPL15A PE=3 SV=1	6	574	0.156863	32	1	1	0		204	24.3	11.34	116	1336.78	0	0	8.06	metabolic process	ribosome	structural molecule activity	Pf00827	3641025	W5Q_05841; I503_05823	Ribosome	2.49885	-2.31996	-4.7803	1.21273	1.32126	-1.2141	-2.2571	0.278262	2.49885	0.431042	0.209192	1.21273	0.221903	0.937729	0.0344103	1	0.146596	0.569248	0.0388338	0.87099	1.1334e+06	2.8322e+06	1.37451e+06	592472
RET3; CAALFM_CR03600CA	Q5A006	Coatomer subunit zeta OS=Candida albicans (strain SC5314 / ATCC MYA-2876) OX=237561 GN=CAALFM_CR03600CA PE=4 SV=1	14	381	0.335	67	2	2	0		200	22.6	4.75	501	4063.26	17.5	0	8.065	transport			Pf01217	3643207	W5Q_05790; I503_05771		-3.95374	-1.81328	21.8338	10.0135	-1.98322	-0.858601	4.44849	3.32387	0.252925	0.551487	21.8338	10.0135	0.222442	1	0.0422128	0.0962624	0.220576	0.477385	0.0938916	0.159982	1.62526e+06	411068	1.62745e+07	8.97518e+06
CAALFM_C106050CA	A0A1D8PDP8	Ubiquinol--cytochrome-c reductase subunit 10 OS=Candida albicans (strain SC5314 / ATCC MYA-2876) OX=237561 GN=orf19.2439.1 PE=4 SV=1	24	163	1.03846	81	1	1	0		78	8.7	8.46	77	4653.37	32.8	0	10.759			catalytic activity;transporter activity	Pf09796	30515003	W5Q_00589; I503_00592		-5.82065	1.93895	46.8296	4.14937	-2.54118	0.955279	5.54935	2.05289	0.171802	1.93895	46.8296	4.14937	0.224608	0.306548	7.47237e-06	0.226795	0.285384	0.146419	2.07334e-05	0.232793	3.62373e+06	622564	1.50362e+07	2.91544e+07
SEC27	A0A1D8PPV5	Coatomer subunit beta' OS=Candida albicans (strain SC5314 / ATCC MYA-2876) OX=237561 GN=SEC27 PE=3 SV=1	13	686	0.102236	96	8	8	0		939	106.1	4.92	675	6067.6	29.43	0	31.037	transport	cytoplasm;Golgi;membrane	protein binding;structural molecule activity	Pf00400, Pf04053	3645870			-2.38991	-5.60533	1.03152	2.41934	-1.25695	-2.4868	0.04477	1.27461	0.418426	0.178402	1.03152	2.41934	0.225129	0.0389669	1	0.21468	0.141489	0.0484514	0.927562	0.136817	4.55064e+06	1.90411e+06	1.10096e+07	1.96412e+06
CaO19.6867; CAALFM_C205550WA	A0A1D8PHE5	Uncharacterized protein OS=Candida albicans (strain SC5314 / ATCC MYA-2876) OX=237561 GN=orf19.6867 PE=3 SV=1	39	202	0.806202	104	4	4	0		129	14.9	6	749	6016.82	26.01	0	16.689				Pf00173	3645560	W5Q_01984; I503_01998		-5.36967	-1.96845	8.4081	3.08229	-2.42483	-0.97706	3.07178	1.624	0.186231	0.508014	8.4081	3.08229	0.225839	0.933836	0.00951649	0.417655	0.273811	0.456206	0.0146163	0.339137	4.45139e+06	828986	1.37205e+07	6.9702e+06
CaO19.1490; MSB2	A0A1D8PGF8	Msb2p OS=Candida albicans (strain SC5314 / ATCC MYA-2876) OX=237561 GN=MSB2 PE=4 SV=1	11	125	1.39319	1963	13	13	0		1409	141	4.06	23517	180526	1424.01	0	184.151	cell organization and biogenesis;regulation of biological process;response to stimulus	cell surface;extracellular;membrane			3635830			-2.21909	-1.41276	1.94925	1.24097	-1.14997	-0.498517	0.962917	0.311465	0.450635	0.707834	1.94925	1.24097	0.227771	1	0.314918	1	0.130965	0.600119	0.15162	0.732577	1.2053e+09	5.43148e+08	1.49573e+09	1.05873e+09
SLA2; CaJ7_0436	A0A1D8PRF5	Sla2p OS=Candida albicans (strain SC5314 / ATCC MYA-2876) OX=237561 GN=SLA2 PE=4 SV=1	6	852	0.0442145	47	5	5	0		1063	120.8	5.36	301	2380.28	6.33	0	20.016	cell organization and biogenesis;transport		protein binding	Pf01417, Pf01608, Pf07651	3643149	W5Q_05410; I503_05373		-3.5444	-7.29073	1.712	3.52155	-1.82554	-2.86606	0.775686	1.81621	0.282135	0.13716	1.712	3.52155	0.229603	0.022487	1	0.0776807	0.209575	0.0322246	0.458525	0.0705422	1.35068e+06	381074	4.75647e+06	652400
NRD1; CAALFM_C500790CA	A0A1D8PN05	Nrd1 complex RNA-binding subunit OS=Candida albicans (strain SC5314 / ATCC MYA-2876) OX=237561 GN=orf19.581 PE=4 SV=1	14	499	0.207736	145	7	7	0		698	75.4	8.87	694	7966.47	28.69	0	28.885			RNA binding	Pf00076, Pf13893, Pf14259	3644125	I503_04115		-3.67356	-3.1791	25.7422	22.2773	-1.87718	-1.66862	4.68606	4.4775	0.272216	0.314555	25.7422	22.2773	0.229644	0.0376199	0.00652577	0.0038389	0.215541	0.0313866	0.0152901	0.00859433	978916	266476	2.18076e+07	6.85967e+06
IDH2	A0A1D8PGS5	Isocitrate dehydrogenase [NAD] subunit, mitochondrial OS=Candida albicans (strain SC5314 / ATCC MYA-2876) OX=237561 GN=IDH2 PE=3 SV=1	57	164	1.0271	379	14	14	0		369	39.8	7.18	1931	25699	190.35	0	81.296	metabolic process	mitochondrion	catalytic activity;metal ion binding;nucleotide binding	Pf00180	3642979	W5Q_01744; I503_01753	Biosynthesis of amino acids; Biosynthesis of antibiotics; Carbon metabolism; Biosynthesis of secondary metabolites; Metabolic pathways; 2-Oxocarboxylic acid metabolism; Citrate cycle (TCA cycle)	-2.08306	-3.87227	3.46546	6.44207	-1.0587	-1.95318	1.79305	2.68752	0.480063	0.258246	3.46546	6.44207	0.230741	0.20555	0.0879814	0.11412	0.122143	0.200739	0.0788774	0.153351	2.14914e+07	1.03172e+07	1.38449e+08	3.57539e+07
GNA1	Q5AHF9	Glucosamine 6-phosphate N-acetyltransferase OS=Candida albicans (strain SC5314 / ATCC MYA-2876) OX=237561 GN=GNA1 PE=3 SV=1	7	455	0.241611	36	1	1	0		149	16.9	6.18	187	2173.43	3.53	0.002	4.992			catalytic activity	Pf00583, Pf13508	3637397	W5Q_01819	Amino sugar and nucleotide sugar metabolism	-11.2378	-1.10588	78.3328	7.70846	-3.49029	-0.145191	6.29155	2.94644	0.088985	0.90426	78.3328	7.70846	0.233858	1	0.0106557	0.0596956	0.408117	0.845586	0.0335203	0.0879448	294042	26165.3	2.26661e+06	2.04961e+06
CaO19.92; CAALFM_C600910CA	A0A1D8PPH3	Uncharacterized protein OS=Candida albicans (strain SC5314 / ATCC MYA-2876) OX=237561 GN=orf19.92 PE=4 SV=1	25	580	0.152902	137	15	15	0		896	99.9	4.67	929	10669.1	44.09	0	67.812	cellular homeostasis;metabolic process;regulation of biological process		catalytic activity	Pf00462, Pf04908	3644030			-3.99313	-2.19857	15.4623	8.51335	-1.99752	-1.13657	3.95068	3.08973	0.25043	0.45484	15.4623	8.51335	0.236682	0.894641	0.00660553	0.196275	0.236389	0.50841	0.0130482	0.303219	1.88463e+06	471969	1.60445e+07	7.29771e+06
CaO19.2821; CAALFM_CR02620CA; CaO19.10339	Q5A222	NADH-ubiquinone oxidoreductase OS=Candida albicans (strain SC5314 / ATCC MYA-2876) OX=237561 GN=CAALFM_CR02620CA PE=3 SV=1	7	828	0.0514286	9	1	1	0		175	19.9	5.72	46	532.28	3.6	0.007	3.419	metabolic process;transport	membrane;mitochondrion			3642567	W5Q_05707; I503_05676	Oxidative phosphorylation; Metabolic pathways	-9.5654	2.83212	176.164	6.50282	-3.25783	1.50188	7.46077	2.70106	0.104543	2.83212	176.164	6.50282	0.23786	0.000219778	5.63558e-06	0.0037978	0.387453	0.00016504	2.10229e-05	0.00512905	62449.5	6528.69	406098	1.15012e+06
BFR1	Q5AMT7	Bfr1p OS=Candida albicans (strain SC5314 / ATCC MYA-2876) OX=237561 GN=BFR1 PE=4 SV=1	25	328	0.41342	191	9	9	0		462	53.5	8.92	1379	14191.8	82.74	0	43.728				Pf06419	3635579	W5Q_03527; I503_03519		-2.60216	-2.24009	2.11797	1.82326	-1.37971	-1.16356	1.08268	0.866523	0.384296	0.446411	2.11797	1.82326	0.238517	0.546976	0.0964824	0.998241	0.164542	0.318218	0.0522298	0.432499	6.16782e+06	2.37027e+06	1.12456e+07	5.02014e+06
SFL1	Q5A287	Transcription factor SFL1 OS=Candida albicans (strain SC5314 / ATCC MYA-2876) OX=237561 GN=SFL1 PE=1 SV=2	6	1040	0.0111801	9	3	3	0		805	90.1	9.5	40	391.96	0	0	7.317	metabolic process;regulation of biological process;response to stimulus	chromosome;nucleus	DNA binding;protein binding	Pf00447	3642498			-3.22569	-423.547	-1.18697	110.622	-1.68961	-8.72638	-0.247281	6.78949	0.310011	0.00236101	0.842483	110.622	0.23906	0.0856751	1	0.110967	0.201959	0.373816	0.715181	0.376704	7506.31	2327.04	830360	1960.49
CaO19.6967; USO6	A0A1D8PK69	Uso6p OS=Candida albicans (strain SC5314 / ATCC MYA-2876) OX=237561 GN=USO6 PE=4 SV=1	4	1064	0.0079646	9	3	3	0		1130	128.6	4.91	57	459.58	2.02	0	7.637	metabolic process;regulation of biological process;transport	membrane	transporter activity	Pf01496, Pf04111, Pf04156, Pf09731, Pf10186, Pf12128, Pf13166	3643647	W5Q_03040; I503_03034		-4.34436	-9.0552	9.13036	19.0309	-2.11914	-3.17875	3.19067	4.25027	0.230184	0.110434	9.13036	19.0309	0.243254	0.218929	0.0318612	0.151045	0.257745	0.34796	0.0508294	0.320991	166177	38251.3	3.16251e+06	349248
CaO19.10820; CaO19.3310; CAALFM_C101220CA	Q5A924	Uncharacterized protein OS=Candida albicans (strain SC5314 / ATCC MYA-2876) OX=237561 GN=orf19.3310 PE=4 SV=1	24	839	0.048	12	3	3	0		250	27.3	5.08	75	523.35	0	0	10.906					3640210	W5Q_00115; I503_00118		-9.35512	-11.0654	77.3306	91.4677	-3.22576	-3.46798	6.27297	6.51519	0.106893	0.0903721	77.3306	91.4677	0.244043	0.226144	0.0530787	0.109149	0.393611	0.392131	0.16648	0.355562	71897.1	7685.32	6.57626e+06	594310
HAM1	Q59N80	Inosine triphosphate pyrophosphatase OS=Candida albicans (strain SC5314 / ATCC MYA-2876) OX=237561 GN=HAM1 PE=3 SV=1	24	307	0.460396	93	3	3	0	Acetyl [N-Term]	202	22	5.66	332	4254.62	15.51	0	12.79	metabolic process	cytoplasm;nucleus	catalytic activity;metal ion binding;nucleotide binding	Pf01725	3647224	W5Q_04404; I503_04401	Purine metabolism; Metabolic pathways	-1.72278	-2.65626	2.54285	3.92068	-0.784738	-1.4094	1.34644	1.9711	0.580457	0.376469	2.54285	3.92068	0.244864	0.154367	0.180108	0.0595593	0.0960771	0.108782	0.121253	0.0586987	2.07644e+06	1.20529e+06	8.14106e+06	3.06486e+06
OSH2; CAALFM_C108180CA	A0A1D8PE79	Oxysterol-binding protein related protein OS=Candida albicans (strain SC5314 / ATCC MYA-2876) OX=237561 GN=orf19.5095 PE=3 SV=1	2	1092	0.00455235	6	2	2	0		1318	148.3	5.31	34	282.1	0	0.002	4.698			protein binding	Pf00023, Pf00169, Pf01237, Pf12796, Pf13606, Pf13637, Pf13857, Pf15409, Pf15413	3640743			2.76003	-15.524	-8.42244	5.08722	1.46468	-3.95643	-3.07424	2.34688	2.76003	0.0644162	0.11873	5.08722	0.24552	0.199237	0.0378677	0.393148	0.179805	0.394134	0.0582072	0.461335	65814.9	181651	334815	21567.5
ECM33	A0A1D8PCY4	Ecm33p OS=Candida albicans (strain SC5314 / ATCC MYA-2876) OX=237561 GN=ECM33 PE=4 SV=1	23	273	0.539007	228	6	6	0		423	43.5	5.05	3074	22577.5	198.27	0	44.93	cell communication;cell organization and biogenesis;response to stimulus	cell surface;extracellular;membrane		Pf01030	30514977	W5Q_00309; I503_00308		-3.41922	-3.00726	1.84465	1.6224	-1.77367	-1.58845	0.88335	0.698131	0.292464	0.332529	1.84465	1.6224	0.246233	0.369344	0.738571	1	0.218367	0.293342	0.326208	0.565364	1.59256e+07	4.65768e+06	2.58378e+07	8.59181e+06
CaJ7_0266; LDG4; CAALFM_C702280WA	Q5AH54	Uncharacterized protein OS=Candida albicans (strain SC5314 / ATCC MYA-2876) OX=237561 GN=orf19.6484 PE=4 SV=1	57	257	0.578947	88	4	2	2		152	16.5	5.11	887	7204.47	49.59	0	28.271					3636999	W5Q_05271; I503_05230		2.86052	1.17713	-3.08302	-1.26869	1.51628	0.235271	-1.62435	-0.343338	2.86052	1.17713	0.324357	0.788215	0.247547	1	0.200452	1	0.187675	0.779093	0.162801	0.7232	4.45339e+06	1.2739e+07	3.51023e+06	4.13199e+06
CaO19.2304; CAALFM_C111120CA; CaO19.9840	Q59WJ7	Uncharacterized protein OS=Candida albicans (strain SC5314 / ATCC MYA-2876) OX=237561 GN=orf19.2304 PE=4 SV=1	28	616	0.137427	47	9	9	0	Acetyl [N-Term]	342	38.4	4.93	353	3406.07	7.4	0	28.694	cell communication;response to stimulus	cytoplasm	protein binding	Pf03114, Pf10455	3644412	W5Q_01076; I503_01086		-5.79596	-2.04772	13.2005	4.66378	-2.53505	-1.03402	3.72253	2.2215	0.172534	0.488347	13.2005	4.66378	0.248855	1	0.0680231	0.386404	0.315429	0.604442	0.126609	0.429198	2.53574e+06	437500	1.18261e+07	5.77524e+06
CaO19.7531; CAALFM_CR00090CA	A0A1D8PRL3	Uncharacterized protein OS=Candida albicans (strain SC5314 / ATCC MYA-2876) OX=237561 GN=CAALFM_CR00090CA PE=4 SV=1	35	750	0.0742358	17	5	5	0		229	25.2	8.25	66	714.33	2.06	0	14.028	metabolic process		catalytic activity	Pf01370, Pf03435, Pf05368, Pf13460	3639734	W5Q_05473; I503_05437		-3.87924	-20.5995	2.55132	13.548	-1.95578	-4.36453	1.35125	3.76001	0.257782	0.048545	2.55132	13.548	0.249173	0.135075	0.564114	0.16291	0.243663	0.29477	0.381129	0.306272	142477	36728	1.93027e+06	93705.1
RPP2B	Q5ANH5	Ribosomal protein P2B OS=Candida albicans (strain SC5314 / ATCC MYA-2876) OX=237561 GN=RPP2B PE=3 SV=1	98	167	0.990991	110	6	6	0		111	11.2	4.07	777	8627.99	39.29	0	42.616	metabolic process	ribosome	catalytic activity;structural molecule activity	Pf00428, Pf10605	3635195	W5Q_02977; I503_02971	Ribosome	-2.91783	-5.38211	10.13	18.6854	-1.54489	-2.42817	3.34056	4.22384	0.342721	0.185801	10.13	18.6854	0.249526	0.234635	0.00845503	0.106239	0.192746	0.284867	0.0141223	0.224368	1.76819e+06	605997	3.30394e+07	6.13875e+06
CaO19.2670; CAALFM_C403200CA	A0A1D8PLR8	Hydroxyacyl-thioester dehydratase OS=Candida albicans (strain SC5314 / ATCC MYA-2876) OX=237561 GN=orf19.2670 PE=4 SV=1	4	657	0.113402	33	1	1	0		291	33.7	7.17	369	2643.2	13.54	0.002	5.363					3637837	I503_03627		-8.93588	-3.06178	123.4	42.2816	-3.15961	-1.61437	6.9472	5.40196	0.111908	0.326607	123.4	42.2816	0.254579	0.122073	0.0204072	0.0099138	0.402185	0.0985356	0.0708864	0.026777	94707.9	10598.6	4.0044e+06	1.30787e+06
SUN4; SUN41	Q59NP5	Secreted beta-glucosidase SUN41 OS=Candida albicans (strain SC5314 / ATCC MYA-2876) OX=237561 GN=SUN41 PE=1 SV=2	13	413	0.291866	122	3	3	0		418	43.7	4.84	1617	12580.9	141.43	0	39.196	cell organization and biogenesis;metabolic process;response to stimulus	cell surface;extracellular	catalytic activity	Pf03856	3647067	W5Q_04671; I503_04647		-2.79781	-5.93668	-1.68466	1.25954	-1.4843	-2.56966	-0.752456	0.332902	0.357423	0.168444	0.593592	1.25954	0.255847	0.0775984	0.834563	1	0.189876	0.0997006	0.313986	0.699322	1.08265e+07	3.86964e+06	1.36365e+07	2.29699e+06
PRN4	Q5AA23	Prn4p OS=Candida albicans (strain SC5314 / ATCC MYA-2876) OX=237561 GN=PRN4 PE=3 SV=1	12	681	0.103659	34	3	3	0		328	37	5.49	59	1531.69	3.32	0	9.443				Pf02678, Pf05726	3639877	I503_00575		-2.86144	-1.24945	18.0517	7.88227	-1.51674	-0.32129	4.17406	2.97861	0.349474	0.800354	18.0517	7.88227	0.260718	1	0.000191108	0.0718265	0.197721	0.662015	0.000398849	0.106972	456158	159415	3.59556e+06	2.87772e+06
ARC1	A0A1D8PSC8	Arc1p OS=Candida albicans (strain SC5314 / ATCC MYA-2876) OX=237561 GN=ARC1 PE=4 SV=1	28	711	0.0921409	34	9	9	0		369	40.9	8.72	193	1995.91	5.96	0	30.785			RNA binding	Pf01588, Pf13410, Pf14497	3645108			-2.10896	-10.2741	2.74594	13.3772	-1.07653	-3.36094	1.4573	3.74171	0.474167	0.0973321	2.74594	13.3772	0.261109	0.165959	0.530099	0.142919	0.140546	0.278888	0.386257	0.267381	585133	277451	7.82745e+06	761863
RGT1	A0A1D8PLL4	Rgt1p OS=Candida albicans (strain SC5314 / ATCC MYA-2876) OX=237561 GN=RGT1 PE=4 SV=1	4	1035	0.0116845	12	2	2	0		1027	115.2	8.31	53	677.54	2.45	0	9.286	metabolic process;regulation of biological process	nucleus	metal ion binding;protein binding	Pf00172	3637920			-3.78299	-1.72991	16.9934	7.77089	-1.91953	-0.7907	4.08691	2.95808	0.264341	0.578063	16.9934	7.77089	0.261902	1	0.00230733	0.150029	0.251364	0.5248	0.00471491	0.221899	332651	87933.4	2.585e+06	1.49429e+06
HMO1	Q59PR9	Transcriptional regulator HMO1 OS=Candida albicans (strain SC5314 / ATCC MYA-2876) OX=237561 GN=HMO1 PE=2 SV=1	5	353	0.376682	84	1	1	0		223	24.8	9.19	964	6946.72	57.3	0.002	4.895	metabolic process;regulation of biological process	nucleus	DNA binding	Pf00505	3646685	W5Q_06027; I503_05983		-2.01972	-1.65168	3.11896	2.55061	-1.01415	-0.723931	1.64106	1.35084	0.495118	0.605446	3.11896	2.55061	0.262884	1	0.135756	0.434285	0.133302	0.49923	0.111392	0.293325	6.03934e+06	2.99019e+06	1.5404e+07	9.32627e+06
COP1; CAALFM_C301720CA	A0A1D8PJB0	Coatomer subunit alpha OS=Candida albicans (strain SC5314 / ATCC MYA-2876) OX=237561 GN=orf19.1672 PE=4 SV=1	6	1003	0.017199	21	3	3	0		1221	138.1	5.87	32	783.17	0	0	10.889	transport	cytoplasm;Golgi;membrane	protein binding;structural molecule activity	Pf00400, Pf04053, Pf06957	3636601			-2.73517	-4.54998	1.48336	2.46759	-1.45163	-2.18586	0.568873	1.3031	0.365607	0.219781	1.48336	2.46759	0.264374	0.0473523	1	0.17943	0.191887	0.0517528	0.629288	0.116908	378503	138384	933990	205273
SAM2	A0A1D8PF68	S-adenosylmethionine synthase OS=Candida albicans (strain SC5314 / ATCC MYA-2876) OX=237561 GN=SAM2 PE=3 SV=1	40	417	0.288312	111	11	11	0		385	42.2	6.13	642	7063.07	34.1	0	46.753	metabolic process	cell surface;membrane	catalytic activity;metal ion binding;nucleotide binding	Pf00438, Pf02772, Pf02773	3644538	I503_01118	Cysteine and methionine metabolism; Metabolic pathways; Biosynthesis of amino acids; Biosynthesis of secondary metabolites	-1.77949	-4.39089	1.56175	3.85362	-0.831464	-2.13451	0.643166	1.94622	0.561959	0.227744	1.56175	3.85362	0.264499	0.350027	1	0.400943	0.109961	0.373569	0.383744	0.390161	3.02387e+06	1.69929e+06	1.16529e+07	2.65387e+06
CaO19.5627; CAALFM_C603380WA	A0A1D8PQ55	Uncharacterized protein OS=Candida albicans (strain SC5314 / ATCC MYA-2876) OX=237561 GN=orf19.5627 PE=4 SV=1	8	807	0.0570652	21	3	3	0		368	40.6	6.65	47	1277.28	6.39	0	9.664			RNA binding	Pf00013, Pf13014	3639231			-2.76187	-2.23335	5.03048	4.06782	-1.46565	-1.15921	2.3307	2.02426	0.362073	0.447758	5.03048	4.06782	0.264627	0.287016	0.00291202	0.0878058	0.193925	0.166356	0.00339352	0.0888708	580183	210069	2.36008e+06	1.05675e+06
CaO19.1658; CAALFM_C301890CA	A0A1D8PJA9	Uncharacterized protein OS=Candida albicans (strain SC5314 / ATCC MYA-2876) OX=237561 GN=orf19.1658 PE=4 SV=1	4	1025	0.013544	6	2	2	0		443	49.2	9.51	56	346.03	2.05	0.002	5.417				Pf08316	3636561			-4.92202	-29.8729	12.1303	73.6216	-2.29925	-4.90076	3.60055	6.20206	0.203168	0.0334752	12.1303	73.6216	0.266107	0.157894	0.193009	0.121894	0.305924	0.386901	0.347469	0.377996	14582.6	2962.72	1.07359e+06	35938.8
ERG10	A0A1D8PH52	Acetyl-CoA C-acetyltransferase OS=Candida albicans (strain SC5314 / ATCC MYA-2876) OX=237561 GN=ERG10 PE=3 SV=1	36	179	0.873134	351	11	11	0		402	41.9	6.9	2526	27238.1	218.28	0	74.554	metabolic process		catalytic activity	Pf00108, Pf00109, Pf02803	3648275	W5Q_01863; I503_01879	Butanoate metabolism; Fatty acid degradation; Tryptophan metabolism; Glyoxylate and dicarboxylate metabolism; Biosynthesis of antibiotics; Propanoate metabolism; Valine, leucine and isoleucine degradation; Pyruvate metabolism; Carbon metabolism; Biosynthesis of secondary metabolites; Synthesis and degradation of ketone bodies; Metabolic pathways; Fatty acid metabolism; Terpenoid backbone biosynth…	-2.40399	1.11256	8.89813	3.32691	-1.26543	0.153887	3.1535	1.73418	0.415975	1.11256	8.89813	3.32691	0.267759	1	0.0138357	0.00456359	0.169415	0.70401	0.0218155	0.00395705	2.5721e+07	1.06993e+07	8.55714e+07	9.52035e+07
CaO19.6336; PGA25	Q59L86	Probable GPI-anchored adhesin-like protein PGA25 OS=Candida albicans (strain SC5314 / ATCC MYA-2876) OX=237561 GN=PGA25 PE=1 SV=1	2	954	0.0252294	22	1	1	0		872	87.5	3.8	246	1630.87	8.68	0.002	5.247		extracellular;membrane		Pf11596	3647890			-4.87219	-1.32643	3.82234	1.04061	-2.28457	-0.407545	1.93446	0.0574315	0.205247	0.753905	3.82234	1.04061	0.272942	1	0.25487	1	0.311777	0.614221	0.246517	0.957371	462847	94997.8	481644	363114
IDH1	A0A1D8PEM5	Isocitrate dehydrogenase [NAD] subunit, mitochondrial OS=Candida albicans (strain SC5314 / ATCC MYA-2876) OX=237561 GN=IDH1 PE=3 SV=1	43	350	0.379121	138	12	12	0		364	39.2	8.38	759	9224.68	42.23	0	48.081	metabolic process	mitochondrion	catalytic activity;metal ion binding;nucleotide binding	Pf00180	3634893	W5Q_00929; I503_00937		-1.61578	-3.85873	1.63459	3.90367	-0.692227	-1.94813	0.708932	1.96483	0.618898	0.259153	1.63459	3.90367	0.273034	0.371941	0.546658	0.366116	0.0945008	0.362294	0.193772	0.359678	6.40497e+06	3.96402e+06	2.50029e+07	6.47956e+06
COR1; CAALFM_C505230CA	A0A1D8PP59	Ubiquinol--cytochrome-c reductase subunit OS=Candida albicans (strain SC5314 / ATCC MYA-2876) OX=237561 GN=orf19.4016 PE=4 SV=1	20	282	0.514806	226	4	4	0		439	47.9	7.17	2067	17656.7	111.6	0	37.941			catalytic activity;metal ion binding	Pf00675, Pf05193	3636470	W5Q_04542; I503_04540	Metabolic pathways; Oxidative phosphorylation	-1.82086	-2.47664	6.75833	9.19231	-0.864622	-1.30838	2.75667	3.20043	0.54919	0.403773	6.75833	9.19231	0.274509	0.680596	0.00698506	0.170433	0.118673	0.44524	0.00962774	0.27273	1.1113e+07	6.10317e+06	1.02155e+08	4.12472e+07
LPD1	Q59RQ6	Dihydrolipoyl dehydrogenase OS=Candida albicans (strain SC5314 / ATCC MYA-2876) OX=237561 GN=LPD1 PE=3 SV=1	52	166	1.00407	493	20	20	0		491	52.8	6.86	3194	32479.1	159.22	0	113.33	cellular homeostasis;metabolic process;regulation of biological process;response to stimulus	mitochondrion	catalytic activity;nucleotide binding	Pf00070, Pf01134, Pf02852, Pf07992	3646037	W5Q_06190; I503_06148	Biosynthesis of antibiotics; Biosynthesis of secondary metabolites; Glycolysis / Gluconeogenesis; Carbon metabolism; Pyruvate metabolism; Glycine, serine and threonine metabolism; Valine, leucine and isoleucine degradation; Glyoxylate and dicarboxylate metabolism; Propanoate metabolism; Citrate cycle (TCA cycle); Metabolic pathways	-1.77858	-3.78813	1.30061	2.7701	-0.830729	-1.92148	0.379183	1.46994	0.562245	0.263983	1.30061	2.7701	0.275732	0.0825431	1	0.140374	0.114529	0.0793026	0.618327	0.103171	2.21358e+07	1.24457e+07	6.13184e+07	1.6187e+07
CHT1	Q5AAH2	Chitinase 1 OS=Candida albicans (strain SC5314 / ATCC MYA-2876) OX=237561 GN=CHT1 PE=1 SV=1	7	939	0.0281385	13	1	1	0		462	48.9	4.84	106	830.38	6.31	0.002	5.421	metabolic process	extracellular	catalytic activity	Pf00704	3639704	W5Q_05482; I503_05446	Amino sugar and nucleotide sugar metabolism; Metabolic pathways	-4.27741	-8.4158	1.2471	2.45367	-2.09674	-3.0731	0.318581	1.29494	0.233786	0.118824	1.2471	2.45367	0.280121	0.0903009	1	0.502346	0.29367	0.138752	0.858304	0.325255	163844	38304.4	402019	47769.5
CAALFM_C203210WA	A0A1D8PGV8	Uncharacterized protein OS=Candida albicans (strain SC5314 / ATCC MYA-2876) OX=237561 GN=orf19.909.1 PE=4 SV=1	31	466	0.22973	17	1	1	0		74	8	6.02	34	757.64	4.81	0.002	5.124		membrane		Pf11022	30515098	W5Q_01756; I503_01765		8.17404	1.17524	4.22829	29.4088	3.03105	0.23295	2.08007	4.87817	8.17404	1.17524	4.22829	29.4088	0.281989	1	0.13795	0.108544	0.427362	0.84682	0.143473	0.264748	21070.4	172230	619654	728239
[truncated: 372 more rows]
[truncated: 64 more columns]

## Sheet: Peptides
Gene Symbol	Accession	Description	Coverage [%]	# PSMs	# Peptides	# Unique Peptides	# Razor Peptides	Modifications	# AAs	MW [kDa]	calc. pI	Score Mascot: Mascot	Score MS Amanda 2.0: MS Amanda 2.0	Score Sequest HT: Sequest HT	Exp. q-value: Combined	Sum PEP Score	Biological Process	Cellular Component	Molecular Function	Pfam IDs	Entrez Gene ID	Ensembl Gene ID	KEGG Pathways	Abundance: F1: Sample, BR1, wt-24h	Abundance: F2: Sample, BR2, wt-24h	Abundance: F3: Sample, BR3, wt-24h	Abundance: F4: Sample, BR1, stp2-24h	Abundance: F5: Sample, BR2, stp2-24h	Abundance: F6: Sample, BR3, stp2-24h	Abundance: F7: Sample, BR1, wt-48h	Abundance: F8: Sample, BR2, wt-48h	Abundance: F9: Sample, BR3, wt-48h	Abundance: F10: Sample, BR1, stp2-48h	Abundance: F11: Sample, BR2, stp2-48h	Abundance: F12: Sample, BR3, stp2-48h	Abundances Count: F1: Sample, BR1, wt-24h	Abundances Count: F2: Sample, BR2, wt-24h	Abundances Count: F3: Sample, BR3, wt-24h	Abundances Count: F4: Sample, BR1, stp2-24h	Abundances Count: F5: Sample, BR2, stp2-24h	Abundances Count: F6: Sample, BR3, stp2-24h	Abundances Count: F7: Sample, BR1, wt-48h	Abundances Count: F8: Sample, BR2, wt-48h	Abundances Count: F9: Sample, BR3, wt-48h	Abundances Count: F10: Sample, BR1, stp2-48h	Abundances Count: F11: Sample, BR2, stp2-48h	Abundances Count: F12: Sample, BR3, stp2-48h	Found in Sample: [S1] F1: Sample, BR1, wt-24h	Found in Sample: [S2] F2: Sample, BR2, wt-24h
[truncated: 8,916 more rows]
[truncated: 120 more columns]

[truncated: 6 more sheets: WT-24h (n=801), Stp2-24h (n=502), WT-48h (n=1067), Stp2-48h (n=820), Assignments SP, GOT non-SP proteins]
